# Supplementary material for: Characterization of Long Non-Coding RNAs in Systemic Sclerosis Monocytes: A Potential Role for PSMB8-AS1 in Altered Cytokine Secretion
Source: Int J Mol Sci. 2021 Apr 22;22(9):4365. doi: 10.3390/ijms22094365 (PMC8122435; doi:10.3390/ijms22094365)
Supplement: Supplementary file 1 [file ijms-22-04365-s001.zip]

Archive with 5 entries (5 files):
- Supplementary Figures.pdf
- SupplementaryTable_1.xlsx
- SupplementaryTable_2.xlsx
- SupplementaryTable_3.xlsx
- SupplementaryTable_4.xlsx
