# Supplementary material for: Characterization of Long Non-Coding RNAs in Systemic Sclerosis Monocytes: A Potential Role for PSMB8-AS1 in Altered Cytokine Secretion
Source: Int J Mol Sci. 2021 Apr 22;22(9):4365. doi: 10.3390/ijms22094365 (PMC8122435; doi:10.3390/ijms22094365)
Supplement: Supplementary file 1 [file ijms-22-04365-s001.zip › SupplementaryTable_1.xlsx]

## Sheet: HC_ncSSc
	Gene Name	Gene Type	baseMean	log2FoldChange	lfcSE	stat	pvalue	padj
ENSG00000156983	BRPF1	protein_coding	1498.79	-1.00162	0.171751	-5.83181	5.48277e-09	8.3633e-05
ENSG00000156030	ELMSAN1	protein_coding	2492.21	-1.00804	0.177323	-5.68478	1.30978e-08	8.3633e-05
ENSG00000265808	SEC22B	protein_coding	1333.1	0.656349	0.116589	5.62961	1.80618e-08	8.3633e-05
ENSG00000126351	THRA	protein_coding	475.948	-1.18894	0.212339	-5.59928	2.15244e-08	8.3633e-05
ENSG00000183955	SETD8	protein_coding	787.24	-0.677794	0.122326	-5.5409	3.00925e-08	9.35395e-05
ENSG00000274211	SOCS7	protein_coding	387.065	-0.94095	0.17084	-5.5078	3.63354e-08	9.41209e-05
ENSG00000174738	NR1D2	protein_coding	1131.35	-1.2165	0.224932	-5.40829	6.36301e-08	0.000141277
ENSG00000100335	MIEF1	protein_coding	1002.29	-0.657303	0.123313	-5.33034	9.80267e-08	0.000190441
ENSG00000250397	RP11-1391J7.1	antisense	16.8915	-1.51175	0.286998	-5.26747	1.38318e-07	0.000238861
ENSG00000229512	AC068580.5	sense_intronic	24.1322	-1.33457	0.256511	-5.20279	1.96322e-07	0.000247075
ENSG00000173930	SLCO4C1	protein_coding	156.168	0.910615	0.17513	5.19965	1.99662e-07	0.000247075
ENSG00000179094	PER1	protein_coding	6408.98	-1.32493	0.255008	-5.19562	2.04038e-07	0.000247075
ENSG00000139620	KANSL2	protein_coding	690.57	-0.926106	0.178329	-5.19324	2.06664e-07	0.000247075
ENSG00000270681	RP11-372K14.2	antisense	112.346	-1.24074	0.240853	-5.15142	2.5852e-07	0.000286994
ENSG00000163833	FBXO40	protein_coding	22.9169	-1.37083	0.267517	-5.12427	2.98688e-07	0.000309481
ENSG00000163961	RNF168	protein_coding	862.415	-0.818907	0.162395	-5.04267	4.59079e-07	0.000375514
ENSG00000112079	STK38	protein_coding	2655.48	0.625291	0.124143	5.03685	4.73253e-07	0.000375514
ENSG00000183044	ABAT	protein_coding	435.391	0.600927	0.119441	5.03115	4.87537e-07	0.000375514
ENSG00000213064	SFT2D2	protein_coding	2633.43	-0.647273	0.12879	-5.02582	5.01297e-07	0.000375514
ENSG00000225648	SBDSP1	transcribed_unprocessed_pseudogene	245.789	-0.738213	0.14713	-5.01741	5.23723e-07	0.000375514
ENSG00000158435	CNOT11	protein_coding	764.752	0.457144	0.0911799	5.01364	5.34087e-07	0.000375514
ENSG00000116793	PHTF1	protein_coding	236.604	0.472398	0.0942283	5.01334	5.34943e-07	0.000375514
ENSG00000024862	CCDC28A	protein_coding	422.128	0.664269	0.132694	5.00601	5.55708e-07	0.000375514
ENSG00000198380	GFPT1	protein_coding	513.711	-0.619449	0.124817	-4.96286	6.94634e-07	0.000424463
ENSG00000084093	REST	protein_coding	1260.83	-0.724403	0.146067	-4.95938	7.07199e-07	0.000424463
ENSG00000109686	SH3D19	protein_coding	54.2965	-1.18187	0.238999	-4.94508	7.61118e-07	0.000424463
ENSG00000110324	IL10RA	protein_coding	18953.3	-0.552883	0.111917	-4.94011	7.80773e-07	0.000424463
ENSG00000134602	MST4	protein_coding	1029.69	0.496723	0.100734	4.93102	8.18017e-07	0.000424463
ENSG00000229989	MIR181A1HG	lincRNA	47.3567	-1.47708	0.299559	-4.93085	8.18735e-07	0.000424463
ENSG00000137834	SMAD6	protein_coding	36.2975	-1.33216	0.270177	-4.93071	8.19321e-07	0.000424463
ENSG00000135828	RNASEL	protein_coding	308.112	1.02562	0.210167	4.88004	1.06065e-06	0.000517932
ENSG00000141026	MED9	protein_coding	243.792	-0.641931	0.131571	-4.87897	1.06639e-06	0.000517932
ENSG00000168785	TSPAN5	protein_coding	9.04381	1.26209	0.259185	4.86943	1.11918e-06	0.0005271
ENSG00000127804	METTL16	protein_coding	485.108	-0.665969	0.13732	-4.84977	1.23607e-06	0.000565029
ENSG00000244486	SCARF2	protein_coding	35.6103	-1.18401	0.245526	-4.82233	1.41891e-06	0.000630079
ENSG00000183741	CBX6	protein_coding	2978.2	-1.22336	0.254348	-4.80978	1.51094e-06	0.000652072
ENSG00000188070	C11orf95	protein_coding	133.49	-0.798202	0.166141	-4.80438	1.55235e-06	0.000652072
ENSG00000188811	NHLRC3	protein_coding	573.206	0.554215	0.11564	4.79259	1.64643e-06	0.00067339
ENSG00000101384	JAG1	protein_coding	352.863	-1.02879	0.215369	-4.77686	1.78056e-06	0.000705565
ENSG00000173846	PLK3	protein_coding	2336.25	-1.2531	0.262546	-4.7729	1.81589e-06	0.000705565
ENSG00000179833	SERTAD2	protein_coding	2969.4	-0.720954	0.151323	-4.76435	1.89466e-06	0.000718216
ENSG00000214706	IFRD2	protein_coding	254.232	-0.555939	0.116955	-4.75346	1.99962e-06	0.000738546
ENSG00000119203	CPSF3	protein_coding	592.826	0.614695	0.129434	4.74909	2.04333e-06	0.000738546
ENSG00000057252	SOAT1	protein_coding	1864.88	0.411203	0.0868218	4.73617	2.17799e-06	0.000768886
ENSG00000162517	PEF1	protein_coding	638.241	0.61376	0.129712	4.73172	2.22622e-06	0.000768886
ENSG00000087502	ERGIC2	protein_coding	271.422	0.740072	0.156664	4.72393	2.3133e-06	0.000771055
ENSG00000107201	DDX58	protein_coding	759.237	1.21834	0.257997	4.72232	2.33172e-06	0.000771055
ENSG00000113621	TXNDC15	protein_coding	531.032	0.713751	0.151563	4.70928	2.48593e-06	0.000781358
ENSG00000120254	MTHFD1L	protein_coding	54.3173	-0.873925	0.185685	-4.70649	2.52018e-06	0.000781358
ENSG00000115935	WIPF1	protein_coding	5858.32	0.649657	0.138253	4.69904	2.61387e-06	0.000781358
ENSG00000175573	C11orf68	protein_coding	301.752	0.723629	0.154071	4.69671	2.64384e-06	0.000781358
ENSG00000147457	CHMP7	protein_coding	696.699	0.681542	0.145126	4.6962	2.65045e-06	0.000781358
ENSG00000130803	ZNF317	protein_coding	1031.08	-0.669468	0.142588	-4.69512	2.66452e-06	0.000781358
ENSG00000160271	RALGDS	protein_coding	1368.53	-1.02859	0.220433	-4.66623	3.0678e-06	0.000854159
ENSG00000123405	NFE2	protein_coding	1121.3	0.878847	0.188346	4.66613	3.06932e-06	0.000854159
ENSG00000173120	KDM2A	protein_coding	5380.64	-0.510039	0.10932	-4.66557	3.07766e-06	0.000854159
ENSG00000151576	QTRTD1	protein_coding	748.061	-0.554992	0.119055	-4.66166	3.1367e-06	0.000855274
ENSG00000228427	RP5-1091N2.9	antisense	76.1843	0.818362	0.175694	4.65787	3.19491e-06	0.000856127
ENSG00000174456	C12orf76	protein_coding	159.152	0.670731	0.14425	4.64978	3.32293e-06	0.000864429
ENSG00000196700	ZNF512B	protein_coding	184.756	-0.783555	0.168546	-4.6489	3.33714e-06	0.000864429
ENSG00000170006	TMEM154	protein_coding	3135.98	0.632761	0.136472	4.63656	3.54265e-06	0.000880228
ENSG00000163811	WDR43	protein_coding	807.925	-0.929891	0.20059	-4.63577	3.55602e-06	0.000880228
ENSG00000161509	GRIN2C	protein_coding	59.5173	-1.30445	0.28143	-4.63508	3.56803e-06	0.000880228
ENSG00000108406	DHX40	protein_coding	855.522	0.49564	0.107041	4.63039	3.64969e-06	0.000886305
ENSG00000089127	OAS1	protein_coding	2788.57	1.22508	0.265021	4.62259	3.78976e-06	0.00090616
ENSG00000188211	NCR3LG1	protein_coding	69.0728	-1.33651	0.289492	-4.61672	3.89843e-06	0.000918022
ENSG00000204611	ZNF616	protein_coding	32.0788	0.999178	0.216724	4.61037	4.01958e-06	0.000932423
ENSG00000266017	MIR4477B	miRNA	10.3052	1.25551	0.273004	4.59886	4.24815e-06	0.000970953
ENSG00000163565	IFI16	protein_coding	3713.01	0.952716	0.20744	4.59272	4.37511e-06	0.000985478
ENSG00000113742	CPEB4	protein_coding	2597.05	-0.851895	0.186242	-4.57413	4.78196e-06	0.00104921
ENSG00000122257	RBBP6	protein_coding	2457.39	-0.698427	0.152707	-4.57365	4.79308e-06	0.00104921
ENSG00000105053	VRK3	protein_coding	630.944	0.531804	0.116645	4.55918	5.13531e-06	0.00110851
ENSG00000069329	VPS35	protein_coding	2540.68	0.626878	0.137704	4.55235	5.30489e-06	0.00112943
ENSG00000175104	TRAF6	protein_coding	676.045	-0.699198	0.153698	-4.54917	5.38565e-06	0.00113113
ENSG00000152117	AC093838.4	transcribed_processed_pseudogene	264.639	-0.902793	0.198576	-4.54633	5.45906e-06	0.00113126
ENSG00000162775	RBM15	protein_coding	515.127	-0.686303	0.151498	-4.53012	5.89505e-06	0.00120554
ENSG00000235027	AC068580.6	antisense	57.3877	-1.20096	0.266251	-4.51065	6.46305e-06	0.00130453
ENSG00000108244	KRT23	protein_coding	54.1994	1.26776	0.281293	4.50689	6.57838e-06	0.00131078
ENSG00000109906	ZBTB16	protein_coding	217.108	-1.31034	0.291101	-4.50133	6.753e-06	0.00131245
ENSG00000137807	KIF23	protein_coding	40.0127	1.14201	0.253731	4.50086	6.7679e-06	0.00131245
ENSG00000116489	CAPZA1	protein_coding	5354.88	0.558387	0.124163	4.4972	6.88534e-06	0.00131245
ENSG00000092330	TINF2	protein_coding	1830.46	0.433391	0.0963969	4.49591	6.92744e-06	0.00131245
ENSG00000155592	ZKSCAN2	protein_coding	145.665	-0.870627	0.193756	-4.49341	7.00899e-06	0.00131245
ENSG00000164967	RPP25L	protein_coding	203.466	0.813612	0.181297	4.48773	7.19862e-06	0.0013267
ENSG00000170915	PAQR8	protein_coding	267.571	1.1428	0.254771	4.48558	7.2717e-06	0.0013267
ENSG00000156232	WHAMM	protein_coding	649.327	-0.736186	0.164387	-4.47836	7.52173e-06	0.0013267
ENSG00000164916	FOXK1	protein_coding	780.771	-0.763236	0.170487	-4.4768	7.57688e-06	0.0013267
ENSG00000136504	KAT7	protein_coding	1519.98	-0.593046	0.132483	-4.47638	7.59189e-06	0.0013267
ENSG00000102699	PARP4	protein_coding	2853.04	0.697387	0.155804	4.47604	7.60388e-06	0.0013267
ENSG00000163568	AIM2	protein_coding	118.12	1.22064	0.272839	4.47384	7.6826e-06	0.0013267
ENSG00000072415	MPP5	protein_coding	245.733	-0.570019	0.127608	-4.46695	7.93424e-06	0.00134554
ENSG00000179933	C14orf119	protein_coding	333.894	1.02723	0.230005	4.46613	7.96486e-06	0.00134554
ENSG00000103269	RHBDL1	protein_coding	11.337	-1.28867	0.289308	-4.45432	8.416e-06	0.00140647
ENSG00000137628	DDX60	protein_coding	766.948	1.132	0.254477	4.44835	8.65312e-06	0.00141177
ENSG00000100647	KIAA0247	protein_coding	4334.37	-0.630866	0.141859	-4.44714	8.70205e-06	0.00141177
ENSG00000164674	SYTL3	protein_coding	531.281	0.651349	0.146479	4.44669	8.72024e-06	0.00141177
ENSG00000068024	HDAC4	protein_coding	1252.76	-0.660162	0.14871	-4.43926	9.02667e-06	0.00144632
ENSG00000004660	CAMKK1	protein_coding	364.841	-0.803992	0.181465	-4.43057	9.39833e-06	0.00149012
ENSG00000011243	AKAP8L	protein_coding	918.114	-0.427261	0.0964813	-4.42844	9.49185e-06	0.00149012
ENSG00000168495	POLR3D	protein_coding	344.449	-0.464489	0.10495	-4.42582	9.60779e-06	0.00149324
ENSG00000165355	FBXO33	protein_coding	1126.57	-0.720219	0.162906	-4.42107	9.8212e-06	0.00150928
ENSG00000104325	DECR1	protein_coding	1491.52	0.542628	0.122788	4.41923	9.90519e-06	0.00150928
ENSG00000107443	CCNJ	protein_coding	396.927	-0.757326	0.171603	-4.41324	1.01837e-05	0.00153664
ENSG00000148358	GPR107	protein_coding	1671.7	-0.34117	0.0773547	-4.41047	1.03148e-05	0.00154146
ENSG00000148426	PROSER2	protein_coding	111.117	-1.1171	0.253616	-4.40469	1.05936e-05	0.00156806
ENSG00000215271	HOMEZ	protein_coding	108.665	0.931612	0.211885	4.39678	1.09869e-05	0.00161044
ENSG00000197063	MAFG	protein_coding	962.634	-1.00042	0.227637	-4.39481	1.10872e-05	0.00161044
ENSG00000253616	RP11-875O11.3	antisense	13.4535	1.17878	0.268391	4.39203	1.12297e-05	0.0016133
ENSG00000105085	MED26	protein_coding	166.268	-0.80915	0.1843	-4.39039	1.13145e-05	0.00161331
ENSG00000109118	PHF12	protein_coding	1573.8	-0.57493	0.131121	-4.38474	1.16125e-05	0.00164075
ENSG00000184787	UBE2G2	protein_coding	2471.14	-0.36218	0.0826429	-4.38247	1.17342e-05	0.00164299
ENSG00000260916	CCPG1	protein_coding	466.086	0.691582	0.158058	4.37551	1.21152e-05	0.00167764
ENSG00000105127	AKAP8	protein_coding	1328.13	-0.851218	0.194607	-4.37403	1.21975e-05	0.00167764
ENSG00000125089	SH3TC1	protein_coding	3119.52	-0.599837	0.137594	-4.35946	1.30383e-05	0.00177755
ENSG00000107951	MTPAP	protein_coding	461.079	-0.524701	0.120428	-4.35698	1.31872e-05	0.00178014
ENSG00000204256	BRD2	protein_coding	7786.65	-0.600384	0.13788	-4.35439	1.33436e-05	0.00178014
ENSG00000260727	SLC7A5P1	unprocessed_pseudogene	8.59239	-1.31881	0.302935	-4.35345	1.34009e-05	0.00178014
ENSG00000165609	NUDT5	protein_coding	454.238	0.50357	0.115755	4.3503	1.35953e-05	0.00179066
ENSG00000115317	HTRA2	protein_coding	129.549	0.821316	0.189086	4.34361	1.40163e-05	0.00180813
ENSG00000197183	NOL4L	protein_coding	555.563	-0.857471	0.197477	-4.34214	1.41102e-05	0.00180813
ENSG00000169991	IFFO2	protein_coding	715.819	-0.774158	0.178337	-4.34098	1.41845e-05	0.00180813
ENSG00000149313	AASDHPPT	protein_coding	335.06	0.696269	0.160484	4.33857	1.43413e-05	0.00180813
ENSG00000126368	NR1D1	protein_coding	107.718	-1.04781	0.241558	-4.3377	1.43978e-05	0.00180813
ENSG00000206337	HCP5	sense_overlapping	490.231	0.635142	0.146438	4.33728	1.4426e-05	0.00180813
ENSG00000204619	PPP1R11	protein_coding	1410.47	0.60042	0.13858	4.33266	1.47318e-05	0.0018317
ENSG00000175505	CLCF1	protein_coding	189.424	-1.13375	0.261898	-4.32898	1.49801e-05	0.00184779
ENSG00000009844	VTA1	protein_coding	656.837	0.786222	0.181835	4.32383	1.53343e-05	0.00186718
ENSG00000169905	TOR1AIP2	protein_coding	709.137	-0.519966	0.120303	-4.32214	1.5452e-05	0.00186718
ENSG00000105722	ERF	protein_coding	758.686	-0.795712	0.184129	-4.32149	1.54978e-05	0.00186718
ENSG00000085978	ATG16L1	protein_coding	462.782	-0.726331	0.168263	-4.31665	1.58415e-05	0.00189392
ENSG00000162924	REL	protein_coding	2155.12	-1.00292	0.232536	-4.31297	1.61077e-05	0.00191104
ENSG00000073737	DHRS9	protein_coding	180.528	1.10893	0.25727	4.31039	1.62969e-05	0.00191584
ENSG00000135521	LTV1	protein_coding	233.338	-0.570509	0.132408	-4.30873	1.64196e-05	0.00191584
ENSG00000277053	GTF2IP1	transcribed_unprocessed_pseudogene	106.341	0.623044	0.144645	4.30741	1.6518e-05	0.00191584
ENSG00000094880	CDC23	protein_coding	319.168	0.548408	0.127443	4.30316	1.68379e-05	0.00193848
ENSG00000189319	FAM53B	protein_coding	2273.6	-0.532291	0.12377	-4.30064	1.70308e-05	0.00194478
ENSG00000132326	PER2	protein_coding	442.8	-1.11571	0.259518	-4.29918	1.71429e-05	0.00194478
ENSG00000119878	CRIPT	protein_coding	177.202	0.695135	0.161834	4.29535	1.74416e-05	0.00195459
ENSG00000213085	CFAP45	protein_coding	39.172	-1.14911	0.267555	-4.29485	1.74809e-05	0.00195459
ENSG00000120158	RCL1	protein_coding	117.8	-1.08698	0.253282	-4.29158	1.77404e-05	0.00196943
ENSG00000119138	KLF9	protein_coding	1590.89	-1.00578	0.234771	-4.28407	1.83508e-05	0.00201282
ENSG00000138078	PREPL	protein_coding	214.313	0.985976	0.230175	4.28359	1.83902e-05	0.00201282
ENSG00000164253	WDR41	protein_coding	813.849	0.506021	0.118294	4.27766	1.88866e-05	0.0020527
ENSG00000256806	C17orf100	lincRNA	7.05757	1.23517	0.289016	4.2737	1.92251e-05	0.00207498
ENSG00000176438	SYNE3	protein_coding	1937.5	-0.832151	0.194835	-4.27106	1.94548e-05	0.00208529
ENSG00000168092	PAFAH1B2	protein_coding	1742.79	-0.603578	0.141649	-4.26107	2.03452e-05	0.00214749
ENSG00000164082	GRM2	protein_coding	25.6661	-1.12463	0.263992	-4.26008	2.0435e-05	0.00214749
ENSG00000232815	RP11-764K9.2	unprocessed_pseudogene	55.9103	1.07175	0.251588	4.25992	2.04496e-05	0.00214749
ENSG00000118298	CA14	protein_coding	19.2216	-1.11118	0.260967	-4.25792	2.06339e-05	0.0021523
ENSG00000011007	TCEB3	protein_coding	1250.81	-0.41521	0.0976009	-4.25416	2.09835e-05	0.00217417
ENSG00000111801	BTN3A3	protein_coding	1149.27	0.598633	0.140787	4.25205	2.1182e-05	0.0021802
ENSG00000198042	MAK16	protein_coding	171.69	-0.729177	0.171763	-4.24525	2.18352e-05	0.00221855
ENSG00000101310	SEC23B	protein_coding	1622.08	0.499666	0.11773	4.24417	2.194e-05	0.00221855
ENSG00000006451	RALA	protein_coding	594.374	0.673626	0.158788	4.2423	2.21239e-05	0.00221855
ENSG00000144843	ADPRH	protein_coding	764.519	0.64913	0.153014	4.24228	2.21255e-05	0.00221855
ENSG00000169635	HIC2	protein_coding	502.937	-1.03013	0.243683	-4.22733	2.36482e-05	0.00235603
ENSG00000175538	KCNE3	protein_coding	1083.89	0.85647	0.202696	4.22539	2.38532e-05	0.00236132
ENSG00000119977	TCTN3	protein_coding	331.712	0.599697	0.142085	4.2207	2.43549e-05	0.00236795
ENSG00000166446	CDYL2	protein_coding	362.49	-0.680031	0.161137	-4.2202	2.4409e-05	0.00236795
ENSG00000128218	VPREB3	protein_coding	2.94988	1.27973	0.303254	4.22	2.44299e-05	NA
ENSG00000174010	KLHL15	protein_coding	1276.8	-0.63911	0.151479	-4.21912	2.45255e-05	0.00236795
ENSG00000168522	FNTA	protein_coding	695.071	0.454296	0.10768	4.21894	2.4545e-05	0.00236795
ENSG00000122218	COPA	protein_coding	4602.67	0.503544	0.119389	4.21769	2.4682e-05	0.00236795
ENSG00000164168	TMEM184C	protein_coding	418.674	0.491826	0.116658	4.21596	2.4872e-05	0.00237154
ENSG00000167258	CDK12	protein_coding	1674.95	-0.636788	0.151213	-4.2112	2.54014e-05	0.00240725
ENSG00000140743	CDR2	protein_coding	182.634	-0.544338	0.129348	-4.20833	2.57265e-05	0.00242328
ENSG00000100150	DEPDC5	protein_coding	447.782	-0.604768	0.143986	-4.20017	2.66711e-05	0.00249353
ENSG00000125149	C16orf70	protein_coding	788.981	-0.6316	0.150412	-4.19914	2.67932e-05	0.00249353
ENSG00000064393	HIPK2	protein_coding	1930.23	-0.670771	0.159852	-4.1962	2.71435e-05	0.00249969
ENSG00000171388	APLN	protein_coding	1.25786	-1.16779	0.278326	-4.19575	2.71966e-05	NA
ENSG00000103018	CYB5B	protein_coding	828.96	0.70974	0.169194	4.19484	2.73065e-05	0.00249969
ENSG00000120333	MRPS14	protein_coding	234.195	0.707391	0.168645	4.19455	2.73418e-05	0.00249969
ENSG00000259165	DDX18P1	processed_pseudogene	8.52674	-1.18598	0.283114	-4.18905	2.80127e-05	0.00254605
ENSG00000133704	IPO8	protein_coding	1071.66	0.533253	0.127449	4.18404	2.86374e-05	0.00258769
ENSG00000111335	OAS2	protein_coding	4806.21	1.17669	0.281457	4.18072	2.90593e-05	0.00261063
ENSG00000254685	FPGT	protein_coding	197.304	0.703156	0.168283	4.17841	2.93549e-05	0.00262203
ENSG00000183458	RP11-958N24.1	transcribed_unprocessed_pseudogene	73.8523	-0.864958	0.207149	-4.17554	2.97276e-05	0.00264015
ENSG00000008083	JARID2	protein_coding	2603.07	-0.785555	0.188359	-4.17052	3.03902e-05	0.00266442
ENSG00000175155	YPEL2	protein_coding	2511.2	-0.691517	0.165882	-4.16873	3.06303e-05	0.00266441
ENSG00000133574	GIMAP4	protein_coding	2701.58	1.10685	0.265666	4.16631	3.09568e-05	0.00266441
ENSG00000136807	CDK9	protein_coding	1943.6	-0.721091	0.173102	-4.16569	3.10411e-05	0.00266441
ENSG00000120889	TNFRSF10B	protein_coding	3878.51	-0.498448	0.119691	-4.16444	3.12114e-05	0.00266441
ENSG00000239306	RBM14	protein_coding	560.602	0.69007	0.165774	4.16272	3.14477e-05	0.00266441
ENSG00000173198	CYSLTR1	protein_coding	1025.13	0.836866	0.20104	4.16269	3.14523e-05	0.00266441
ENSG00000223891	OSER1-AS1	lincRNA	33.2803	0.886282	0.212958	4.16176	3.15798e-05	0.00266441
ENSG00000272886	DCP1A	protein_coding	770.629	-0.798969	0.192013	-4.16102	3.16827e-05	0.00266441
ENSG00000167325	RRM1	protein_coding	213.089	0.536518	0.128946	4.16079	3.17152e-05	0.00266441
ENSG00000111252	SH2B3	protein_coding	7699.14	-0.703288	0.169155	-4.15765	3.21539e-05	0.00268675
ENSG00000213593	TMX2	protein_coding	618.591	0.360992	0.0868596	4.15604	3.23813e-05	0.00268898
ENSG00000164080	RAD54L2	protein_coding	548.111	-0.669545	0.161141	-4.15502	3.25265e-05	0.00268898
ENSG00000267040	RP11-35G9.3	antisense	63.8765	0.808549	0.194745	4.15183	3.29824e-05	0.00269729
ENSG00000181929	PRKAG1	protein_coding	780.727	0.458999	0.110657	4.14794	3.35476e-05	0.00269729
ENSG00000107651	SEC23IP	protein_coding	703.67	0.528123	0.127337	4.14746	3.36182e-05	0.00269729
ENSG00000183628	DGCR6	protein_coding	31.6679	-0.95301	0.229853	-4.14617	3.38077e-05	0.00269729
ENSG00000128513	POT1	protein_coding	251.853	0.639232	0.154209	4.14522	3.39486e-05	0.00269729
ENSG00000152213	ARL11	protein_coding	585.766	0.794201	0.191692	4.14311	3.4263e-05	0.00269729
ENSG00000079263	SP140	protein_coding	216.762	0.87226	0.210534	4.14309	3.42658e-05	0.00269729
ENSG00000053702	NRIP2	protein_coding	97.4679	-0.844866	0.204017	-4.14116	3.45548e-05	0.00269729
ENSG00000235863	B3GALT4	protein_coding	293.089	0.799218	0.192997	4.14109	3.45657e-05	0.00269729
ENSG00000138018	EPT1	protein_coding	442.912	-0.560626	0.135413	-4.14011	3.47134e-05	0.00269729
ENSG00000128272	ATF4	protein_coding	8247.37	-0.67947	0.164123	-4.14002	3.47274e-05	0.00269729
ENSG00000028203	VEZT	protein_coding	608.315	0.485847	0.117405	4.1382	3.50036e-05	0.00269729
ENSG00000168389	MFSD2A	protein_coding	287.481	-0.938948	0.226906	-4.13804	3.50283e-05	0.00269729
ENSG00000108387	SEPT4	protein_coding	48.9874	0.972696	0.235073	4.13786	3.50568e-05	0.00269729
ENSG00000163810	TGM4	protein_coding	25.822	-0.941074	0.22757	-4.13531	3.54473e-05	0.0027139
ENSG00000114573	ATP6V1A	protein_coding	3078.84	0.570109	0.13793	4.13332	3.57557e-05	0.0027241
ENSG00000134086	VHL	protein_coding	1952.27	-0.396305	0.0959766	-4.12918	3.64062e-05	0.0027449
ENSG00000140749	IGSF6	protein_coding	2470.25	0.801318	0.194186	4.12654	3.68258e-05	0.0027449
ENSG00000184432	COPB2	protein_coding	1771.49	0.804094	0.194878	4.12613	3.68912e-05	0.0027449
ENSG00000142039	CCDC97	protein_coding	730.384	0.632592	0.15333	4.12569	3.69629e-05	0.0027449
ENSG00000160223	ICOSLG	protein_coding	568.128	-1.18513	0.287301	-4.12506	3.70645e-05	0.0027449
ENSG00000111641	NOP2	protein_coding	462.164	-0.750621	0.181991	-4.12448	3.7157e-05	0.0027449
ENSG00000163154	TNFAIP8L2	protein_coding	640.59	1.03011	0.249794	4.12381	3.7265e-05	0.0027449
ENSG00000116539	ASH1L	protein_coding	1234.76	-0.684953	0.166353	-4.11747	3.83056e-05	0.00280824
ENSG00000108256	NUFIP2	protein_coding	3677.01	-0.687276	0.167006	-4.11527	3.86735e-05	0.00281171
ENSG00000087152	ATXN7L3	protein_coding	3097.58	-0.378318	0.0919556	-4.11413	3.88635e-05	0.00281171
ENSG00000141506	PIK3R5	protein_coding	4744.2	-0.510779	0.124158	-4.11394	3.88957e-05	0.00281171
ENSG00000214402	LCNL1	protein_coding	2.8643	-1.22425	0.298125	-4.10649	4.01714e-05	NA
ENSG00000072042	RDH11	protein_coding	868.342	0.569301	0.138871	4.09948	4.14072e-05	0.0029794
ENSG00000178502	KLHL11	protein_coding	82.6686	-0.916294	0.223995	-4.0907	4.3008e-05	0.00305789
ENSG00000135378	PRRG4	protein_coding	753.471	0.722703	0.176687	4.0903	4.30825e-05	0.00305789
ENSG00000266412	NCOA4	protein_coding	15850.5	0.60647	0.148272	4.09026	4.30883e-05	0.00305789
ENSG00000178096	BOLA1	protein_coding	57.108	0.867461	0.212283	4.08635	4.38211e-05	0.00309126
ENSG00000139977	NAA30	protein_coding	344.068	-0.665745	0.162948	-4.08564	4.39563e-05	0.00309126
ENSG00000103472	RRN3P2	transcribed_unprocessed_pseudogene	149.893	-0.9674	0.236981	-4.08219	4.4613e-05	0.00312331
ENSG00000133059	DSTYK	protein_coding	680.335	-0.562056	0.137721	-4.08112	4.48198e-05	0.00312372
ENSG00000198909	MAP3K3	protein_coding	6455.01	-0.359584	0.0881749	-4.07808	4.5409e-05	0.00313783
ENSG00000171307	ZDHHC16	protein_coding	239.52	0.603778	0.148058	4.07799	4.54261e-05	0.00313783
ENSG00000165244	ZNF367	protein_coding	23.5551	-0.862104	0.211591	-4.07438	4.61363e-05	0.00313957
ENSG00000123411	IKZF4	protein_coding	189.731	-0.564432	0.138553	-4.07376	4.62602e-05	0.00313957
ENSG00000115137	DNAJC27	protein_coding	116.888	-0.875287	0.214911	-4.07278	4.64548e-05	0.00313957
ENSG00000088986	DYNLL1	protein_coding	1295.11	0.830834	0.204006	4.07259	4.64928e-05	0.00313957
ENSG00000066044	ELAVL1	protein_coding	884.09	0.467926	0.114919	4.07179	4.6654e-05	0.00313957
ENSG00000168795	ZBTB5	protein_coding	246.183	-0.813511	0.199795	-4.07174	4.66633e-05	0.00313957
ENSG00000107929	LARP4B	protein_coding	1588.24	0.343936	0.084582	4.0663	4.77654e-05	0.00318632
ENSG00000115548	KDM3A	protein_coding	1437.36	-0.891915	0.219494	-4.06351	4.83407e-05	0.00318632
ENSG00000219545	RPA3OS	protein_coding	276.63	0.524091	0.129017	4.06219	4.86146e-05	0.00318632
ENSG00000156671	SAMD8	protein_coding	1545.39	-0.851479	0.209633	-4.06176	4.87044e-05	0.00318632
ENSG00000100883	SRP54	protein_coding	664.444	0.422735	0.10408	4.06164	4.87299e-05	0.00318632
ENSG00000111877	MCM9	protein_coding	577.414	-0.42302	0.104214	-4.05916	4.92502e-05	0.00318632
ENSG00000213626	LBH	protein_coding	49.6715	1.12363	0.276832	4.05888	4.93094e-05	0.00318632
ENSG00000157916	RER1	protein_coding	1496.28	0.390861	0.0963201	4.05793	4.95088e-05	0.00318632
ENSG00000156502	SUPV3L1	protein_coding	310.447	-0.76757	0.189174	-4.05749	4.96036e-05	0.00318632
ENSG00000204519	ZNF551	protein_coding	212.924	-0.824276	0.203174	-4.05699	4.97094e-05	0.00318632
ENSG00000116701	NCF2	protein_coding	20835.5	0.477201	0.117628	4.05687	4.9734e-05	0.00318632
ENSG00000164134	NAA15	protein_coding	891.72	-0.667381	0.164522	-4.05648	4.98183e-05	0.00318632
ENSG00000171566	PLRG1	protein_coding	677.01	0.495887	0.122406	4.05118	5.09599e-05	0.00324243
ENSG00000240356	RPL23AP7	transcribed_processed_pseudogene	35.5228	0.784177	0.193601	4.05048	5.11128e-05	0.00324243
ENSG00000109685	WHSC1	protein_coding	709.294	-0.301488	0.0744848	-4.04764	5.17358e-05	0.00326861
ENSG00000140332	TLE3	protein_coding	6319.64	-1.05545	0.260904	-4.04535	5.22456e-05	0.00328745
ENSG00000119820	YIPF4	protein_coding	572.748	0.708856	0.175326	4.04308	5.27539e-05	0.00329636
ENSG00000138768	USO1	protein_coding	1082.98	0.50095	0.123911	4.04282	5.28113e-05	0.00329636
ENSG00000141385	AFG3L2	protein_coding	793.597	-0.462599	0.114466	-4.04138	5.31371e-05	0.00330084
ENSG00000272908	RP11-121A8.1	lincRNA	68.1318	0.896155	0.221816	4.04009	5.34306e-05	0.00330084
ENSG00000163877	SNIP1	protein_coding	413.1	-1.0007	0.247807	-4.03822	5.38576e-05	0.00330084
ENSG00000110721	CHKA	protein_coding	297.262	-0.875011	0.216774	-4.03651	5.42518e-05	0.00330084
ENSG00000123353	ORMDL2	protein_coding	137.202	0.680684	0.168636	4.03639	5.42789e-05	0.00330084
ENSG00000134987	WDR36	protein_coding	413.464	-0.510245	0.126436	-4.0356	5.44639e-05	0.00330084
ENSG00000138459	SLC35A5	protein_coding	793.451	0.704342	0.174534	4.03555	5.44735e-05	0.00330084
ENSG00000180871	CXCR2	protein_coding	403.411	1.17925	0.292249	4.03509	5.45821e-05	0.00330084
ENSG00000166439	RNF169	protein_coding	1057.13	-0.609358	0.151059	-4.03392	5.48534e-05	0.00330439
ENSG00000065559	MAP2K4	protein_coding	663.795	0.649221	0.161079	4.03045	5.56694e-05	0.00334059
ENSG00000142875	PRKACB	protein_coding	522.178	0.709353	0.176103	4.02807	5.62372e-05	0.00336168
ENSG00000156650	KAT6B	protein_coding	634.502	-0.578559	0.143676	-4.02682	5.65356e-05	0.0033622
ENSG00000174839	DENND6A	protein_coding	1018.28	-0.380105	0.0944071	-4.02623	5.66784e-05	0.0033622
ENSG00000204389	HSPA1A	protein_coding	848.358	1.04543	0.259923	4.02206	5.76918e-05	0.0034093
ENSG00000170836	PPM1D	protein_coding	453.849	-0.563833	0.140341	-4.01761	5.87921e-05	0.00344509
ENSG00000204152	TIMM23B	protein_coding	234.375	-0.545782	0.135851	-4.0175	5.8818e-05	0.00344509
ENSG00000090971	NAT14	protein_coding	56.8772	-0.791741	0.197152	-4.0159	5.92203e-05	0.00344509
ENSG00000242125	SNHG3	sense_intronic	501.985	-0.71118	0.177101	-4.01567	5.92761e-05	0.00344509
ENSG00000121807	CCR2	protein_coding	2834.64	0.984506	0.245251	4.01429	5.96262e-05	0.00344509
ENSG00000132773	TOE1	protein_coding	324.28	-0.553507	0.137957	-4.01217	6.01635e-05	0.00344509
ENSG00000196233	LCOR	protein_coding	1034.61	-0.702993	0.17522	-4.01205	6.01931e-05	0.00344509
ENSG00000164338	UTP15	protein_coding	182.601	-0.783192	0.19524	-4.01144	6.03503e-05	0.00344509
ENSG00000161277	THAP8	protein_coding	58.1506	0.884495	0.220545	4.01051	6.05891e-05	0.00344509
ENSG00000156384	SFR1	protein_coding	170.121	0.570576	0.142279	4.01027	6.06502e-05	0.00344509
ENSG00000127870	RNF6	protein_coding	988.906	-0.492382	0.122791	-4.00993	6.07356e-05	0.00344509
ENSG00000065526	SPEN	protein_coding	4523.16	-0.614009	0.153173	-4.00859	6.10827e-05	0.00345217
ENSG00000107362	ABHD17B	protein_coding	354.289	-0.57049	0.142395	-4.00638	6.16558e-05	0.00347189
ENSG00000152904	GGPS1	protein_coding	391.829	0.706925	0.176534	4.00447	6.21574e-05	0.00347189
ENSG00000171155	C1GALT1C1	protein_coding	419.333	0.755343	0.188646	4.00403	6.22739e-05	0.00347189
ENSG00000070731	ST6GALNAC2	protein_coding	224.363	0.793184	0.198106	4.00383	6.23251e-05	0.00347189
ENSG00000265806	MIR4292	miRNA	11.4414	-1.0078	0.251764	-4.00297	6.2552e-05	0.00347208
ENSG00000178385	PLEKHM3	protein_coding	278.659	-0.56174	0.140396	-4.00112	6.30431e-05	0.00348689
ENSG00000100281	HMGXB4	protein_coding	588.706	-0.587513	0.146964	-3.99766	6.39728e-05	0.00350869
ENSG00000072274	TFRC	protein_coding	2192.98	-0.979741	0.245129	-3.99684	6.41933e-05	0.00350869
ENSG00000114315	HES1	protein_coding	25.1068	-1.15411	0.288776	-3.99656	6.42704e-05	0.00350869
ENSG00000155640	C10orf12	protein_coding	196.611	-0.662496	0.165777	-3.9963	6.43403e-05	0.00350869
ENSG00000117528	ABCD3	protein_coding	472.297	0.459774	0.115164	3.99233	6.54278e-05	0.00355552
ENSG00000145990	GFOD1	protein_coding	382.369	-0.993834	0.249061	-3.99032	6.59844e-05	0.00356787
ENSG00000114120	SLC25A36	protein_coding	1320.56	-0.783034	0.196275	-3.98948	6.62193e-05	0.00356787
ENSG00000079950	STX7	protein_coding	1993.79	0.672485	0.168584	3.98903	6.63438e-05	0.00356787
ENSG00000136448	NMT1	protein_coding	1667.15	0.647691	0.162457	3.98686	6.69542e-05	0.00358829
ENSG00000272462	U91328.19	lincRNA	110.455	-0.925231	0.232167	-3.98518	6.74274e-05	0.00360123
ENSG00000175727	MLXIP	protein_coding	3136.7	-0.484689	0.121753	-3.98091	6.86508e-05	0.00365401
ENSG00000010165	METTL13	protein_coding	279.164	0.868173	0.218379	3.97553	7.02228e-05	0.00370136
ENSG00000110031	LPXN	protein_coding	1638.12	0.607599	0.15284	3.97539	7.02652e-05	0.00370136
ENSG00000129691	ASH2L	protein_coding	911.595	0.593967	0.14942	3.97515	7.03359e-05	0.00370136
ENSG00000196850	PPTC7	protein_coding	3919.45	-0.520886	0.131053	-3.97462	7.0493e-05	0.00370136
ENSG00000108946	PRKAR1A	protein_coding	6022.24	0.652564	0.164295	3.97191	7.12977e-05	0.00373101
ENSG00000103044	HAS3	protein_coding	44.8231	-0.899812	0.226677	-3.96957	7.20016e-05	0.00375156
ENSG00000139675	HNRNPA1L2	protein_coding	61.2261	-0.776001	0.195533	-3.96864	7.22828e-05	0.00375156
ENSG00000167962	ZNF598	protein_coding	739.543	-0.610136	0.153765	-3.96799	7.24813e-05	0.00375156
ENSG00000250959	GLUD1P3	transcribed_unprocessed_pseudogene	64.0706	-0.876095	0.220822	-3.96742	7.26559e-05	0.00375156
ENSG00000102977	ACD	protein_coding	247.68	0.595166	0.150156	3.96364	7.3814e-05	0.00378879
ENSG00000077721	UBE2A	protein_coding	1534.82	0.34308	0.0865632	3.96335	7.39057e-05	0.00378879
ENSG00000268001	CTC-241F20.3	antisense	444.433	0.779596	0.196734	3.9627	7.41083e-05	0.00378879
ENSG00000132109	TRIM21	protein_coding	544.854	0.659766	0.166743	3.95679	7.59637e-05	0.00387091
ENSG00000270223	RP13-36G14.4	sense_intronic	7.45203	1.07381	0.271471	3.95551	7.63729e-05	0.00387183
ENSG00000109572	CLCN3	protein_coding	739.837	0.576564	0.14579	3.95476	7.66128e-05	0.00387183
ENSG00000074755	ZZEF1	protein_coding	2763.1	-0.482023	0.121896	-3.95439	7.67291e-05	0.00387183
ENSG00000187688	TRPV2	protein_coding	1036.06	0.551372	0.139475	3.9532	7.71126e-05	0.00387859
ENSG00000155876	RRAGA	protein_coding	847.983	0.53638	0.135746	3.95134	7.77158e-05	0.00389632
ENSG00000169188	APEX2	protein_coding	359.376	0.582035	0.147347	3.95008	7.81245e-05	0.00389949
ENSG00000139146	FAM60A	protein_coding	802.721	-0.455401	0.115303	-3.9496	7.82809e-05	0.00389949
ENSG00000235245	RP11-122K13.12	antisense	80.4021	-1.08607	0.275219	-3.94621	7.93993e-05	0.00393565
ENSG00000163297	ANTXR2	protein_coding	2729.55	0.400221	0.101428	3.94586	7.95132e-05	0.00393565
ENSG00000178966	RMI1	protein_coding	107.294	0.820492	0.208054	3.94364	8.02529e-05	0.00395965
ENSG00000099622	CIRBP	protein_coding	4689.36	-0.430968	0.109357	-3.94093	8.11647e-05	0.00399197
ENSG00000172366	FAM195A	protein_coding	441.802	-0.591108	0.150095	-3.93822	8.20871e-05	0.0040246
ENSG00000159921	GNE	protein_coding	533.346	-0.743205	0.188767	-3.93715	8.24548e-05	0.00402991
ENSG00000187554	TLR5	protein_coding	946.474	0.745311	0.189467	3.93372	8.36414e-05	0.00407444
ENSG00000212978	AC016747.3	processed_transcript	42.952	0.856329	0.217729	3.93301	8.38902e-05	0.00407444
ENSG00000173276	ZBTB21	protein_coding	963.087	-0.800941	0.203742	-3.93115	8.45419e-05	0.00407844
ENSG00000135211	TMEM60	protein_coding	161.809	0.821725	0.209059	3.93058	8.47402e-05	0.00407844
ENSG00000198815	FOXJ3	protein_coding	1330.66	-0.332798	0.084678	-3.93015	8.48914e-05	0.00407844
ENSG00000177034	MTX3	protein_coding	145.744	-0.872939	0.222139	-3.92969	8.50557e-05	0.00407844
ENSG00000213799	ZNF845	protein_coding	215.301	-0.723784	0.184221	-3.92889	8.53408e-05	0.00407844
ENSG00000163563	MNDA	protein_coding	19020.6	0.884652	0.225199	3.9283	8.5547e-05	0.00407844
ENSG00000119630	PGF	protein_coding	4.86102	-1.11865	0.284844	-3.92726	8.59205e-05	NA
ENSG00000139719	VPS33A	protein_coding	299.577	0.692006	0.176229	3.92674	8.61064e-05	0.00407926
ENSG00000167851	CD300A	protein_coding	2968.11	0.728249	0.185486	3.92616	8.63129e-05	0.00407926
ENSG00000103489	XYLT1	protein_coding	1795.02	-0.754549	0.19219	-3.92605	8.63516e-05	0.00407926
ENSG00000183978	COA3	protein_coding	311.344	0.78996	0.201263	3.92501	8.67268e-05	0.00408457
ENSG00000178700	DHFRL1	protein_coding	52.4824	0.833905	0.212511	3.92407	8.70671e-05	0.00408821
ENSG00000198455	ZXDB	protein_coding	285.104	-0.646429	0.16477	-3.92323	8.73711e-05	0.00409012
ENSG00000111615	KRR1	protein_coding	460.52	-0.807117	0.205991	-3.91822	8.92051e-05	0.00416344
ENSG00000196664	TLR7	protein_coding	1098.01	0.962881	0.245791	3.91748	8.94807e-05	0.0041638
ENSG00000180747	SMG1P3	transcribed_unprocessed_pseudogene	108.008	-1.00254	0.256321	-3.91126	9.18164e-05	0.00423745
ENSG00000155252	PI4K2A	protein_coding	869.613	-1.05985	0.270979	-3.91121	9.18352e-05	0.00423745
ENSG00000103248	MTHFSD	protein_coding	181.982	0.637148	0.162908	3.91109	9.18814e-05	0.00423745
ENSG00000229320	KRT8P12	transcribed_processed_pseudogene	65.5801	0.781179	0.199855	3.90873	9.27819e-05	0.00425414
ENSG00000162894	FAIM3	protein_coding	62.3666	1.11742	0.285878	3.90871	9.27907e-05	0.00425414
ENSG00000148840	PPRC1	protein_coding	648.553	-0.91082	0.233147	-3.90664	9.35887e-05	0.00426874
ENSG00000077420	APBB1IP	protein_coding	3158.06	0.546436	0.13988	3.90646	9.36585e-05	0.00426874
ENSG00000166927	MS4A7	protein_coding	4066.66	0.542105	0.138814	3.90526	9.41232e-05	0.00427738
ENSG00000115486	GGCX	protein_coding	499.11	0.363491	0.0931826	3.90085	9.58562e-05	0.00434296
ENSG00000162413	KLHL21	protein_coding	762.875	-0.800955	0.205375	-3.89996	9.62099e-05	0.00434296
ENSG00000164961	KIAA0196	protein_coding	1173.67	0.46425	0.119093	3.89822	9.69027e-05	0.00434296
ENSG00000128394	APOBEC3F	protein_coding	94.0092	0.691238	0.177334	3.89795	9.7012e-05	0.00434296
ENSG00000198824	CHAMP1	protein_coding	377.53	-0.536797	0.137754	-3.89677	9.74821e-05	0.00434296
ENSG00000132357	CARD6	protein_coding	425.992	0.658255	0.168928	3.89666	9.75294e-05	0.00434296
ENSG00000115520	COQ10B	protein_coding	1296.31	-0.634305	0.162791	-3.89645	9.76142e-05	0.00434296
ENSG00000188305	C19orf35	protein_coding	78.4749	0.942251	0.241885	3.89544	9.80188e-05	0.00434296
ENSG00000171135	JAGN1	protein_coding	502.21	0.551602	0.141607	3.89529	9.80813e-05	0.00434296
ENSG00000204261	PSMB8-AS1	lincRNA	645.227	0.72714	0.186753	3.8936	9.87671e-05	0.0043609
ENSG00000123066	MED13L	protein_coding	5514.1	-0.610134	0.15675	-3.8924	9.92559e-05	0.00437007
ENSG00000197535	MYO5A	protein_coding	3578.2	-0.421913	0.10842	-3.89148	9.96335e-05	0.00437431
ENSG00000116138	DNAJC16	protein_coding	268.197	0.488998	0.125709	3.88992	0.000100278	0.00439021
ENSG00000088854	C20orf194	protein_coding	719.615	-0.553801	0.142415	-3.88863	0.000100811	0.00440114
ENSG00000008130	NADK	protein_coding	6766.07	0.565866	0.145656	3.88495	0.000102353	0.00444356
ENSG00000073969	NSF	protein_coding	932.27	0.662225	0.170459	3.88494	0.000102355	0.00444356
ENSG00000105613	MAST1	protein_coding	10.459	1.01133	0.260372	3.88417	0.00010268	0.00444466
ENSG00000005302	MSL3	protein_coding	1594.79	0.34971	0.0900497	3.88353	0.000102952	0.00444466
ENSG00000162664	ZNF326	protein_coding	663.776	-0.71951	0.185449	-3.87982	0.000104535	0.00450052
ENSG00000107938	EDRF1	protein_coding	509.564	-0.689634	0.177796	-3.87878	0.00010498	0.00450716
ENSG00000132613	MTSS1L	protein_coding	15.6125	-1.08893	0.280884	-3.87678	0.000105846	0.00453185
ENSG00000241878	PISD	protein_coding	1567.62	0.322932	0.0833814	3.87295	0.000107525	0.00459003
ENSG00000131470	PSMC3IP	protein_coding	25.8643	-0.893726	0.230903	-3.87057	0.000108581	0.00459003
ENSG00000181873	IBA57	protein_coding	184.489	-0.973449	0.251528	-3.87015	0.00010877	0.00459003
ENSG00000116574	RHOU	protein_coding	2154.1	-0.775841	0.200482	-3.86988	0.000108889	0.00459003
ENSG00000109756	RAPGEF2	protein_coding	1626.83	-0.810557	0.209481	-3.86935	0.000109126	0.00459003
ENSG00000183337	BCOR	protein_coding	886.557	-0.780847	0.201815	-3.86912	0.000109228	0.00459003
ENSG00000205413	SAMD9	protein_coding	1161.85	0.971383	0.251149	3.86775	0.000109843	0.00459003
ENSG00000006715	VPS41	protein_coding	1302.31	0.558742	0.144474	3.86741	0.000109997	0.00459003
ENSG00000172845	SP3	protein_coding	4704.26	-0.481595	0.124528	-3.86736	0.00011002	0.00459003
ENSG00000166860	ZBTB39	protein_coding	282.431	-0.756345	0.195636	-3.86608	0.0001106	0.00459003
ENSG00000177409	SAMD9L	protein_coding	2242.29	1.09275	0.282674	3.86575	0.000110749	0.00459003
ENSG00000132196	HSD17B7	protein_coding	83.9198	0.709604	0.183577	3.86543	0.000110894	0.00459003
ENSG00000198517	MAFK	protein_coding	935.227	-0.897511	0.232209	-3.8651	0.000111044	0.00459003
ENSG00000231113	RP3-475N16.1	antisense	171.591	-0.599209	0.155182	-3.86133	0.000112771	0.00464904
ENSG00000157601	MX1	protein_coding	2743.13	1.11658	0.289428	3.85787	0.000114377	0.00470216
ENSG00000182158	CREB3L2	protein_coding	1071.92	-0.404076	0.104757	-3.85726	0.000114665	0.00470216
ENSG00000167522	ANKRD11	protein_coding	2599.22	-0.435731	0.113013	-3.85557	0.000115458	0.00471241
ENSG00000105369	CD79A	protein_coding	57.0595	1.12896	0.292881	3.85466	0.000115892	0.00471241
ENSG00000148634	HERC4	protein_coding	759.083	0.667197	0.17312	3.85396	0.000116224	0.00471241
ENSG00000146476	C6orf211	protein_coding	471.728	0.769871	0.199764	3.8539	0.000116251	0.00471241
ENSG00000117305	HMGCL	protein_coding	286.927	0.719566	0.186729	3.85352	0.000116431	0.00471241
ENSG00000074054	CLASP1	protein_coding	885.899	-0.474964	0.123314	-3.85167	0.000117316	0.00472716
ENSG00000182700	IGIP	protein_coding	13.1489	1.05724	0.274524	3.85118	0.000117551	0.00472717
ENSG00000113368	LMNB1	protein_coding	1799.48	0.764029	0.198418	3.8506	0.00011783	0.00472716
ENSG00000149269	PAK1	protein_coding	4210.04	0.548847	0.142571	3.84963	0.000118295	0.00472717
ENSG00000006125	AP2B1	protein_coding	2675.25	0.46845	0.121688	3.84959	0.000118316	0.00472716
ENSG00000198218	QRICH1	protein_coding	1575.25	-0.579641	0.150627	-3.8482	0.00011899	0.0047419
ENSG00000197937	ZNF347	protein_coding	39.5446	0.65266	0.169669	3.84668	0.00011973	0.0047448
ENSG00000140280	LYSMD2	protein_coding	591.647	0.699572	0.181934	3.84519	0.000120457	0.0047448
ENSG00000168291	PDHB	protein_coding	915.977	0.461735	0.120089	3.84494	0.000120582	0.0047448
ENSG00000175938	ORAI3	protein_coding	203.607	0.800879	0.208305	3.84474	0.000120681	0.0047448
ENSG00000176994	SMCR8	protein_coding	1007.52	-0.73128	0.190211	-3.84457	0.000120763	0.0047448
ENSG00000264207	RP11-196G18.23	antisense	16.9566	1.03479	0.269176	3.8443	0.000120894	0.0047448
ENSG00000130544	ZNF557	protein_coding	135.412	-0.785632	0.204463	-3.84242	0.000121829	0.00476103
ENSG00000131381	ZFYVE20	protein_coding	649.237	-0.6097	0.158684	-3.84223	0.000121921	0.00476103
ENSG00000169641	LUZP1	protein_coding	676.29	-0.697407	0.181559	-3.84121	0.000122428	0.00476886
ENSG00000100804	PSMB5	protein_coding	225.244	0.602446	0.156896	3.83978	0.000123144	0.00478476
ENSG00000197782	ZNF780A	protein_coding	81.8184	1.01083	0.263353	3.83833	0.000123873	0.00479817
ENSG00000117036	ETV3	protein_coding	1001.48	-0.760605	0.198184	-3.83787	0.000124107	0.00479817
ENSG00000113300	CNOT6	protein_coding	936.148	0.483379	0.125981	3.83692	0.000124588	0.00480274
ENSG00000153885	KCTD15	protein_coding	765.572	-0.453506	0.118211	-3.83642	0.000124843	0.00480274
ENSG00000169508	GPR183	protein_coding	6489.39	-1.0521	0.274292	-3.83568	0.000125218	0.00480527
ENSG00000197037	ZSCAN25	protein_coding	444.265	-0.509799	0.132944	-3.83468	0.000125727	0.00481293
ENSG00000262714	RP11-44F14.8	lincRNA	6.20085	1.12775	0.294182	3.83352	0.000126321	0.0048238
ENSG00000272888	AC013394.2	processed_transcript	3809.32	-0.688461	0.179633	-3.83259	0.000126803	0.00483031
ENSG00000134504	KCTD1	protein_coding	13.2423	1.04139	0.271983	3.82887	0.000128733	0.00487449
ENSG00000165168	CYBB	protein_coding	38747.9	0.634018	0.165602	3.82856	0.000128895	0.00487449
ENSG00000128833	MYO5C	protein_coding	7.97105	-1.06565	0.278343	-3.82855	0.000128903	0.00487449
ENSG00000204308	RNF5	protein_coding	707.797	0.571632	0.14943	3.8254	0.000130557	0.00491613
ENSG00000175857	GAPT	protein_coding	1289.73	0.824894	0.215644	3.82525	0.000130637	0.00491613
ENSG00000170004	CHD3	protein_coding	2725.45	-0.519912	0.136026	-3.82215	0.000132291	0.00496019
ENSG00000121858	TNFSF10	protein_coding	3684.56	1.04493	0.273418	3.82173	0.000132517	0.00496019
ENSG00000172183	ISG20	protein_coding	293.64	0.906947	0.237349	3.82115	0.000132828	0.00496019
ENSG00000243927	MRPS6	protein_coding	343.819	0.519097	0.135866	3.82066	0.000133095	0.00496019
ENSG00000169429	CXCL8	protein_coding	37130.6	-1.09493	0.286625	-3.82009	0.000133404	0.00496019
ENSG00000149196	C11orf73	protein_coding	405.236	0.506558	0.132638	3.81909	0.000133944	0.00496838
ENSG00000109911	ELP4	protein_coding	249.086	0.48939	0.128201	3.81736	0.000134887	0.00497705
ENSG00000117139	KDM5B	protein_coding	564.519	-0.635077	0.166371	-3.81723	0.00013496	0.00497705
ENSG00000114439	BBX	protein_coding	1142.96	-0.473963	0.12419	-3.81645	0.000135387	0.00497705
ENSG00000227507	LTB	protein_coding	281.718	0.780486	0.204513	3.81632	0.000135458	0.00497705
ENSG00000132294	EFR3A	protein_coding	1827.44	0.503634	0.132061	3.81364	0.000136932	0.00501935
ENSG00000137478	FCHSD2	protein_coding	1527.73	-0.500449	0.131265	-3.81252	0.000137557	0.00503038
ENSG00000156239	N6AMT1	protein_coding	19.8832	0.910591	0.238937	3.81101	0.000138403	0.0050381
ENSG00000237499	RP11-356I2.4	antisense	66.0317	-0.809195	0.212341	-3.81083	0.000138502	0.0050381
ENSG00000168310	IRF2	protein_coding	1626.86	0.792363	0.207947	3.8104	0.000138741	0.0050381
ENSG00000169860	P2RY1	protein_coding	53.1611	-1.03279	0.271374	-3.80578	0.000141359	0.00509621
ENSG00000118363	SPCS2	protein_coding	1125.19	0.556454	0.146251	3.80479	0.000141927	0.00509621
ENSG00000204524	ZNF805	protein_coding	107.892	-0.660412	0.173631	-3.80354	0.000142644	0.00509621
ENSG00000144597	EAF1	protein_coding	2187.97	-1.03241	0.271442	-3.80341	0.000142719	0.00509621
ENSG00000115310	RTN4	protein_coding	6682.49	0.383494	0.100848	3.80271	0.000143121	0.00509621
ENSG00000269918	AF131215.9	sense_intronic	4.92551	1.11926	0.294367	3.80226	0.000143382	NA
ENSG00000161929	SCIMP	protein_coding	2063.91	0.681717	0.179297	3.80216	0.000143442	0.00509621
ENSG00000224470	ATXN1L	protein_coding	2077.48	-0.822013	0.216197	-3.80215	0.000143446	0.00509621
ENSG00000188981	MSANTD1	protein_coding	11.78	-0.934238	0.245725	-3.80197	0.000143553	0.00509621
ENSG00000173848	NET1	protein_coding	193.031	-1.08859	0.286349	-3.8016	0.000143763	0.00509621
ENSG00000279345	RP3-522J7.7	antisense	6.33613	-1.14833	0.302076	-3.80147	0.000143837	0.00509621
ENSG00000006712	PAF1	protein_coding	779.952	0.404424	0.106391	3.80128	0.000143948	0.00509621
ENSG00000205629	LCMT1	protein_coding	324.271	0.463565	0.121978	3.80041	0.00014446	0.0051027
ENSG00000198901	PRC1	protein_coding	76.9505	-0.999042	0.263068	-3.79765	0.000146073	0.00513835
ENSG00000136485	DCAF7	protein_coding	1843.81	0.760321	0.200213	3.79756	0.00014613	0.00513835
ENSG00000162702	ZNF281	protein_coding	1490.02	-0.650697	0.171405	-3.79624	0.000146905	0.00515395
ENSG00000196646	ZNF136	protein_coding	303.413	-0.678813	0.179007	-3.7921	0.00014938	0.00522203
ENSG00000139163	ETNK1	protein_coding	823.473	0.654927	0.172719	3.79187	0.000149518	0.00522203
ENSG00000185745	IFIT1	protein_coding	951.572	1.14909	0.30328	3.78886	0.000151338	0.00526933
ENSG00000168329	CX3CR1	protein_coding	3071.98	1.138	0.300392	3.78839	0.000151625	0.00526933
ENSG00000120685	PROSER1	protein_coding	935.132	-0.488235	0.128891	-3.78796	0.000151889	0.00526933
ENSG00000091106	NLRC4	protein_coding	894.38	0.853253	0.225359	3.7862	0.00015297	0.00529502
ENSG00000056050	C4orf27	protein_coding	206.874	0.739387	0.195329	3.78535	0.000153494	0.00530136
ENSG00000255092	RP11-58K22.4	antisense	3.86948	-1.12288	0.296665	-3.78502	0.000153697	NA
ENSG00000186340	THBS2	protein_coding	17.6559	0.778177	0.20561	3.78472	0.000153883	0.00530298
ENSG00000136603	SKIL	protein_coding	1012.83	-0.742022	0.196093	-3.78403	0.000154309	0.0053059
ENSG00000118971	CCND2	protein_coding	301.845	-1.03182	0.272737	-3.7832	0.000154825	0.00531191
ENSG00000160445	ZER1	protein_coding	863.686	0.509729	0.134784	3.78182	0.000155684	0.0053196
ENSG00000128563	PRKRIP1	protein_coding	412.316	-0.522239	0.138101	-3.78158	0.000155838	0.0053196
ENSG00000099910	KLHL22	protein_coding	169.867	0.541931	0.143325	3.78113	0.000156116	0.0053196
ENSG00000188396	TCTEX1D4	protein_coding	19.9238	-1.05791	0.279821	-3.78065	0.000156419	0.0053196
ENSG00000224420	ADM5	protein_coding	5.10502	-1.10369	0.291964	-3.78024	0.000156678	NA
ENSG00000237015	CTA-984G1.5	antisense	2.37765	-1.13716	0.30084	-3.77994	0.000156869	NA
ENSG00000081692	JMJD4	protein_coding	43.3284	0.644029	0.17049	3.77752	0.000158399	0.00537519
ENSG00000107554	DNMBP	protein_coding	507.687	-0.590061	0.15626	-3.77614	0.000159277	0.00539322
ENSG00000124641	MED20	protein_coding	184.358	0.774909	0.2053	3.77452	0.000160314	0.00541653
ENSG00000169155	ZBTB43	protein_coding	1139.44	-1.0894	0.288786	-3.77234	0.000161721	0.00543358
ENSG00000101665	SMAD7	protein_coding	372.455	-0.933731	0.24753	-3.7722	0.000161815	0.00543358
ENSG00000105705	SUGP1	protein_coding	529.165	0.426684	0.113127	3.77173	0.000162121	0.00543358
ENSG00000019991	HGF	protein_coding	535.671	0.659517	0.174873	3.7714	0.000162335	0.00543358
ENSG00000174007	CEP19	protein_coding	61.7024	0.870232	0.230824	3.77011	0.000163173	0.00543358
ENSG00000275023	MLLT6	protein_coding	2093.64	-0.446239	0.118363	-3.77007	0.0001632	0.00543358
ENSG00000173875	ZNF791	protein_coding	434.945	-0.606073	0.160763	-3.76997	0.000163266	0.00543358
ENSG00000091483	FH	protein_coding	636.655	0.486979	0.129236	3.76813	0.000164478	0.0054622
ENSG00000151239	TWF1	protein_coding	1088.43	-0.553251	0.146926	-3.76552	0.000166206	0.00550782
ENSG00000088035	ALG6	protein_coding	252.754	0.489186	0.129948	3.76448	0.000166894	0.00551886
ENSG00000161996	WDR90	protein_coding	116.047	-0.956391	0.254158	-3.76297	0.000167905	0.00554052
ENSG00000235750	KIAA0040	protein_coding	1374.73	0.637751	0.169556	3.76129	0.000169038	0.00555665
ENSG00000004961	HCCS	protein_coding	403.996	0.353911	0.0940968	3.76114	0.000169144	0.00555665
ENSG00000116604	MEF2D	protein_coding	3440	-0.790414	0.210198	-3.76033	0.000169691	0.00555665
ENSG00000196378	ZNF34	protein_coding	171.604	-0.504141	0.134075	-3.76013	0.000169824	0.00555665
ENSG00000257702	LBX2-AS1	antisense	81.5271	0.744385	0.19802	3.75914	0.000170496	0.0055669
ENSG00000186660	ZFP91	protein_coding	1966.54	-0.484559	0.128944	-3.75789	0.00017135	0.00558305
ENSG00000109814	UGDH	protein_coding	190.889	0.748354	0.199237	3.75611	0.000172574	0.00561118
ENSG00000066136	NFYC	protein_coding	1173.85	0.330417	0.0880033	3.7546	0.000173617	0.00561209
ENSG00000204568	MRPS18B	protein_coding	405.284	0.694699	0.185037	3.75437	0.000173776	0.00561209
ENSG00000102871	TRADD	protein_coding	634.096	0.601043	0.160103	3.75411	0.00017396	0.00561209
ENSG00000107371	EXOSC3	protein_coding	99.555	0.520843	0.138748	3.75387	0.000174125	0.00561209
ENSG00000143387	CTSK	protein_coding	276.993	-0.646657	0.172283	-3.75346	0.000174407	0.00561209
ENSG00000279412	RP11-394B2.5	TEC	12.6142	-1.04029	0.277227	-3.7525	0.00017508	0.00562208
ENSG00000113532	ST8SIA4	protein_coding	1813.85	0.49033	0.130729	3.75073	0.000176321	0.00565026
ENSG00000205133	TRIQK	protein_coding	978.767	0.570238	0.152061	3.75006	0.000176793	0.00565373
ENSG00000140992	PDPK1	protein_coding	1699.9	-0.381455	0.10174	-3.74931	0.000177325	0.00565909
ENSG00000162704	ARPC5	protein_coding	11155.7	0.562695	0.150199	3.74633	0.000179444	0.00569873
ENSG00000124164	VAPB	protein_coding	358.338	0.384643	0.102685	3.74587	0.000179769	0.00569873
ENSG00000164040	PGRMC2	protein_coding	527.653	0.46022	0.122874	3.74546	0.000180066	0.00569873
ENSG00000131263	RLIM	protein_coding	1582.48	-0.86737	0.231598	-3.74514	0.00018029	0.00569873
ENSG00000178057	NDUFAF3	protein_coding	455.59	0.549207	0.146651	3.74499	0.0001804	0.00569873
ENSG00000255050	RP11-661A12.9	antisense	24.6013	-1.07909	0.288296	-3.74298	0.000181848	0.00571796
ENSG00000166888	STAT6	protein_coding	12117.2	0.333863	0.089201	3.74282	0.000181968	0.00571796
ENSG00000138594	TMOD3	protein_coding	1401.14	0.673832	0.180046	3.74255	0.000182162	0.00571796
ENSG00000148331	ASB6	protein_coding	509.091	-0.471728	0.126082	-3.74143	0.000182973	0.00571796
ENSG00000230224	PHBP9	processed_pseudogene	27.7155	-1.03168	0.275747	-3.74141	0.000182991	0.00571796
ENSG00000186642	PDE2A	protein_coding	26.8194	-1.12119	0.299696	-3.7411	0.000183216	0.00571796
ENSG00000140450	ARRDC4	protein_coding	2226.86	-0.765759	0.204738	-3.74019	0.000183882	0.00572723
ENSG00000111331	OAS3	protein_coding	6216.3	1.05206	0.281618	3.73576	0.000187148	0.00581178
ENSG00000092470	WDR76	protein_coding	25.1578	0.809502	0.216705	3.7355	0.000187344	0.00581178
ENSG00000006062	MAP3K14	protein_coding	930.928	-0.50631	0.135588	-3.73417	0.000188336	0.00583092
ENSG00000106560	GIMAP2	protein_coding	1807.36	0.734398	0.196763	3.73239	0.000189669	0.00584606
ENSG00000265018	CTGLF12P	transcribed_unprocessed_pseudogene	3.12009	-1.05814	0.283525	-3.73208	0.000189907	NA
ENSG00000128654	MTX2	protein_coding	137.476	0.513473	0.137601	3.73161	0.000190258	0.00584606
ENSG00000125910	S1PR4	protein_coding	1043.9	0.733159	0.196476	3.73154	0.00019031	0.00584606
ENSG00000173575	CHD2	protein_coding	2552.94	-0.579437	0.155282	-3.73152	0.00019033	0.00584606
ENSG00000165233	C9orf89	protein_coding	1853.41	-0.646011	0.173361	-3.7264	0.000194235	0.00592017
ENSG00000161835	GRASP	protein_coding	1032.42	-1.08138	0.290203	-3.7263	0.000194313	0.00592017
ENSG00000168303	MPLKIP	protein_coding	366.553	0.577573	0.155003	3.72621	0.000194382	0.00592017
ENSG00000126016	AMOT	protein_coding	17.9983	0.788238	0.211545	3.72611	0.00019446	0.00592017
ENSG00000125812	GZF1	protein_coding	1188.94	-0.737899	0.198048	-3.72586	0.000194647	0.00592017
ENSG00000108826	MRPL27	protein_coding	279.565	0.439844	0.118136	3.72319	0.00019672	0.00597154
ENSG00000272489	RP11-182L21.5	sense_intronic	18.9529	-0.858364	0.230711	-3.72051	0.000198817	0.00600773
ENSG00000139793	MBNL2	protein_coding	657.684	-0.668622	0.179738	-3.71998	0.000199235	0.00600773
ENSG00000181220	ZNF746	protein_coding	783.063	-0.538902	0.144869	-3.71992	0.000199283	0.00600773
ENSG00000138448	ITGAV	protein_coding	565.868	0.516807	0.138938	3.7197	0.000199459	0.00600773
ENSG00000010072	SPRTN	protein_coding	309.966	-0.649731	0.174768	-3.71767	0.000201068	0.00604096
ENSG00000104695	PPP2CB	protein_coding	923.664	0.532405	0.143223	3.71733	0.000201339	0.00604096
ENSG00000156261	CCT8	protein_coding	3630.93	0.545322	0.146835	3.71385	0.000204129	0.00609874
ENSG00000123338	NCKAP1L	protein_coding	7560.33	0.386317	0.104042	3.71309	0.000204747	0.00609874
ENSG00000090054	SPTLC1	protein_coding	1320	0.390909	0.10528	3.71304	0.000204785	0.00609874
ENSG00000119392	GLE1	protein_coding	701.313	0.507996	0.136816	3.71298	0.000204835	0.00609874
ENSG00000143553	SNAPIN	protein_coding	529.705	0.598911	0.161333	3.71227	0.000205411	0.00610421
ENSG00000126883	NUP214	protein_coding	2295.54	0.40411	0.108976	3.70825	0.000208698	0.00618589
ENSG00000130734	ATG4D	protein_coding	293.432	-0.625713	0.16875	-3.70794	0.000208956	0.00618589
ENSG00000154429	CCSAP	protein_coding	832.841	-0.472891	0.127576	-3.70674	0.000209941	0.00619583
ENSG00000264773	MIR4420	miRNA	33.7154	-1.02642	0.276924	-3.7065	0.00021014	0.00619583
ENSG00000183722	LHFP	protein_coding	17.6551	-1.0393	0.280431	-3.70608	0.000210488	0.00619583
ENSG00000116809	ZBTB17	protein_coding	641.023	-0.851721	0.229876	-3.70513	0.000211282	0.0062046
ENSG00000141526	SLC16A3	protein_coding	2526.51	0.573242	0.154731	3.70477	0.000211584	0.0062046
ENSG00000087266	SH3BP2	protein_coding	7397.88	-0.659976	0.178193	-3.70372	0.000212463	0.00621866
ENSG00000139697	SBNO1	protein_coding	1321.58	-0.579994	0.156624	-3.7031	0.000212981	0.0062221
ENSG00000137944	CCBL2	protein_coding	493.97	0.477145	0.12889	3.70196	0.000213939	0.00623833
ENSG00000135452	TSPAN31	protein_coding	361.608	0.495227	0.133802	3.70119	0.000214587	0.00624372
ENSG00000079435	LIPE	protein_coding	7.454	1.01262	0.273623	3.70079	0.000214927	0.00624372
ENSG00000142166	IFNAR1	protein_coding	2145.32	0.56863	0.153728	3.69893	0.000216514	0.00627809
ENSG00000169926	KLF13	protein_coding	9649.99	-0.478043	0.129263	-3.69823	0.000217104	0.00628347
ENSG00000031698	SARS	protein_coding	1964.7	0.426185	0.115275	3.69713	0.000218049	0.00629045
ENSG00000083635	NUFIP1	protein_coding	96.6629	-0.642316	0.173739	-3.69701	0.000218154	0.00629045
ENSG00000111653	ING4	protein_coding	630.902	0.749668	0.202829	3.69606	0.000218967	0.006294
ENSG00000139112	GABARAPL1	protein_coding	2555.32	-0.973701	0.263453	-3.69592	0.000219087	0.006294
ENSG00000250251	PKD1P6	transcribed_unprocessed_pseudogene	115.215	-0.767701	0.207761	-3.69512	0.000219784	0.00630238
ENSG00000128311	TST	protein_coding	368.947	0.689527	0.186657	3.69409	0.000220672	0.00631618
ENSG00000274677	RP11-505K9.5	sense_intronic	21.0603	-1.00041	0.270875	-3.69326	0.000221398	0.00632466
ENSG00000100504	PYGL	protein_coding	4182.38	0.460159	0.124609	3.69282	0.000221782	0.00632466
ENSG00000132824	SERINC3	protein_coding	2930.95	0.527538	0.142899	3.69169	0.000222768	0.00634113
ENSG00000188542	DUSP28	protein_coding	150.647	-0.635819	0.172267	-3.69088	0.000223478	0.00634561
ENSG00000221909	FAM200A	protein_coding	29.9189	0.657399	0.178129	3.69058	0.000223742	0.00634561
ENSG00000122729	ACO1	protein_coding	290.792	0.530551	0.14383	3.68873	0.000225377	0.00638034
ENSG00000152242	C18orf25	protein_coding	1042.89	-0.568467	0.154211	-3.68629	0.000227544	0.00641637
ENSG00000206992	RNU6-574P	snRNA	13.0892	-1.11008	0.301143	-3.68622	0.000227613	0.00641637
ENSG00000007944	MYLIP	protein_coding	1319.68	-0.705696	0.191461	-3.68584	0.000227948	0.00641637
ENSG00000157191	NECAP2	protein_coding	2981.82	0.661444	0.179475	3.68545	0.000228301	0.00641637
ENSG00000204392	LSM2	protein_coding	254.469	0.575701	0.156268	3.68406	0.000229544	0.00643514
ENSG00000137752	CASP1	protein_coding	7105.47	0.526881	0.143035	3.68357	0.000229989	0.00643514
ENSG00000168216	LMBRD1	protein_coding	1890.57	0.501398	0.136127	3.68333	0.000230211	0.00643514
ENSG00000137500	CCDC90B	protein_coding	508.045	0.5082	0.137997	3.68267	0.0002308	0.00643667
ENSG00000116874	WARS2	protein_coding	114.47	0.609499	0.165519	3.68235	0.000231094	0.00643667
ENSG00000168477	TNXB	protein_coding	11.8792	-0.903511	0.245503	-3.68025	0.000233005	0.00646632
ENSG00000133119	RFC3	protein_coding	125.278	0.501953	0.136405	3.67988	0.000233341	0.00646632
ENSG00000131966	ACTR10	protein_coding	949.492	0.445055	0.120945	3.67981	0.000233407	0.00646632
ENSG00000162408	NOL9	protein_coding	291.134	-0.634146	0.172377	-3.67884	0.0002343	0.00647021
ENSG00000103591	AAGAB	protein_coding	755.819	0.355309	0.0965841	3.67875	0.00023438	0.00647021
ENSG00000124782	RREB1	protein_coding	2143.98	-0.426078	0.115869	-3.67723	0.000235777	0.00648107
ENSG00000113448	PDE4D	protein_coding	519.197	-1.06868	0.290643	-3.67695	0.000236039	0.00648107
ENSG00000101457	DNTTIP1	protein_coding	898.158	0.571129	0.155338	3.67669	0.000236284	0.00648107
ENSG00000106299	WASL	protein_coding	427.309	-0.568033	0.154514	-3.67626	0.000236674	0.00648107
ENSG00000235499	AC073046.25	lincRNA	114.07	-0.672277	0.182895	-3.67576	0.000237139	0.00648107
ENSG00000115145	STAM2	protein_coding	601.274	0.492862	0.13409	3.67562	0.000237275	0.00648107
ENSG00000155545	MIER3	protein_coding	407.34	-0.683477	0.185976	-3.67508	0.000237776	0.00648335
ENSG00000187994	RINL	protein_coding	234.979	0.569381	0.155064	3.67191	0.000240746	0.00655285
ENSG00000135638	EMX1	protein_coding	3.14908	-1.106	0.301227	-3.67166	0.00024098	NA
ENSG00000166716	ZNF592	protein_coding	2523.5	-0.317976	0.0866324	-3.67041	0.00024216	0.00655552
ENSG00000179115	FARSA	protein_coding	487.163	0.709739	0.193371	3.67035	0.000242217	0.00655552
ENSG00000109854	HTATIP2	protein_coding	1048.81	0.499599	0.136127	3.67009	0.000242468	0.00655552
ENSG00000196741	CXorf24	lincRNA	35.3009	0.582583	0.158741	3.67002	0.000242531	0.00655552
ENSG00000117394	SLC2A1	protein_coding	176.915	-0.99487	0.271214	-3.6682	0.00024426	0.00657978
ENSG00000269951	RP11-797A18.6	sense_intronic	37.6933	-0.872553	0.23787	-3.66819	0.000244276	0.00657978
ENSG00000108651	UTP6	protein_coding	849.151	0.501802	0.136826	3.66746	0.000244974	0.00658386
ENSG00000118263	KLF7	protein_coding	2376.92	-0.636578	0.173604	-3.66685	0.000245557	0.00658386
ENSG00000145675	PIK3R1	protein_coding	2254.08	-0.814096	0.222024	-3.6667	0.000245698	0.00658386
ENSG00000112304	ACOT13	protein_coding	144.934	0.654463	0.178525	3.66595	0.000246418	0.00659179
ENSG00000172345	STARD5	protein_coding	52.0128	-1.10449	0.301493	-3.66339	0.000248898	0.00664389
ENSG00000101452	DHX35	protein_coding	270.535	-0.513481	0.140185	-3.66288	0.000249395	0.00664389
ENSG00000229754	CXCR2P1	transcribed_unprocessed_pseudogene	514.844	1.04178	0.284437	3.66262	0.000249648	0.00664389
ENSG00000136450	SRSF1	protein_coding	1689.5	0.525349	0.143475	3.6616	0.000250646	0.00665903
ENSG00000145241	CENPC	protein_coding	507.177	-0.744422	0.203339	-3.66099	0.000251247	0.00666363
ENSG00000090339	ICAM1	protein_coding	2515.54	-0.825877	0.225701	-3.65917	0.000253034	0.00669214
ENSG00000169016	E2F6	protein_coding	386.526	-0.748155	0.204469	-3.65902	0.000253183	0.00669214
ENSG00000163257	DCAF16	protein_coding	419.398	-0.783252	0.214148	-3.65753	0.000254659	0.0067197
ENSG00000168826	ZBTB49	protein_coding	146.287	-0.687247	0.18799	-3.65577	0.00025641	0.00675444
ENSG00000185305	ARL15	protein_coding	337.832	0.454709	0.124414	3.6548	0.000257383	0.00676847
ENSG00000105011	ASF1B	protein_coding	148.475	0.859866	0.235298	3.65437	0.000257813	0.00676847
ENSG00000135679	MDM2	protein_coding	1319.31	-0.48422	0.13254	-3.65339	0.000258801	0.00678293
ENSG00000143409	FAM63A	protein_coding	453.923	0.585526	0.160338	3.65182	0.000260384	0.00681295
ENSG00000179456	ZBTB18	protein_coding	1716.39	-0.507679	0.139091	-3.64999	0.000262252	0.00683926
ENSG00000214783	POLR2J4	processed_transcript	26.7415	-0.975019	0.26713	-3.64997	0.00026227	0.00683926
ENSG00000104889	RNASEH2A	protein_coding	141.264	0.613291	0.168068	3.64906	0.000263201	0.00684618
ENSG00000066583	ISOC1	protein_coding	189.727	0.545274	0.149437	3.64885	0.000263416	0.00684618
ENSG00000102401	ARMCX3	protein_coding	267.183	0.604758	0.165898	3.64536	0.000267023	0.00692289
ENSG00000111684	LPCAT3	protein_coding	725.931	0.464233	0.12736	3.64503	0.00026736	0.00692289
ENSG00000119922	IFIT2	protein_coding	1378.75	1.0892	0.29886	3.64452	0.000267888	0.00692289
ENSG00000259623	RP11-156E6.1	sense_overlapping	126.382	-0.675963	0.185518	-3.64366	0.000268788	0.00692289
ENSG00000279117	CTD-2562J17.6	TEC	533.878	-0.443685	0.121774	-3.64352	0.000268929	0.00692289
ENSG00000062598	ELMO2	protein_coding	1096.17	0.454876	0.124849	3.64342	0.00026904	0.00692289
ENSG00000157557	ETS2	protein_coding	7515.93	-0.889735	0.244276	-3.64234	0.000270172	0.00694052
ENSG00000204946	ZNF783	protein_coding	364.371	-0.530433	0.145704	-3.64048	0.000272133	0.00695747
ENSG00000118960	HS1BP3	protein_coding	948.905	0.502027	0.137902	3.64046	0.000272152	0.00695747
ENSG00000070444	MNT	protein_coding	1329.71	-0.8112	0.22283	-3.64044	0.000272175	0.00695747
ENSG00000011638	TMEM159	protein_coding	246.637	0.563789	0.154921	3.63921	0.00027348	0.00697935
ENSG00000115919	KYNU	protein_coding	1893.34	0.570919	0.15693	3.63805	0.000274709	0.00699922
ENSG00000060656	PTPRU	protein_coding	15.3155	0.9619	0.264505	3.6366	0.000276261	0.0070268
ENSG00000163684	RPP14	protein_coding	191.821	-0.462348	0.127152	-3.63619	0.000276695	0.0070268
ENSG00000163840	DTX3L	protein_coding	1463.49	0.774131	0.212924	3.63572	0.000277208	0.00702834
ENSG00000215154	AC141586.5	transcribed_unprocessed_pseudogene	109.671	-0.696262	0.191538	-3.63512	0.000277852	0.00703318
ENSG00000160218	TRAPPC10	protein_coding	1585.76	-0.423555	0.116563	-3.63369	0.000279397	0.00704983
ENSG00000243406	MRPS31P5	transcribed_unprocessed_pseudogene	11.2401	-1.00131	0.275564	-3.63367	0.000279417	0.00704983
ENSG00000158828	PINK1	protein_coding	268.523	0.481291	0.13249	3.63266	0.000280511	0.00706598
ENSG00000069956	MAPK6	protein_coding	2296.74	-1.01233	0.278903	-3.62967	0.000283784	0.00711919
ENSG00000175221	MED16	protein_coding	733.253	0.64254	0.177027	3.62962	0.000283841	0.00711919
ENSG00000211677	IGLC2	IG_C_gene	36.688	1.08176	0.298049	3.62947	0.000283998	0.00711919
ENSG00000242485	MRPL20	protein_coding	695.033	0.306775	0.0845599	3.62791	0.00028573	0.00715108
ENSG00000086827	ZW10	protein_coding	205.223	0.708621	0.195358	3.62729	0.000286409	0.00715653
ENSG00000103544	C16orf62	protein_coding	1124.47	0.438908	0.121057	3.62562	0.000288269	0.0071821
ENSG00000123609	NMI	protein_coding	1303.68	0.682729	0.188315	3.62546	0.000288445	0.0071821
ENSG00000130766	SESN2	protein_coding	336.806	-0.624659	0.172314	-3.62513	0.000288818	0.0071821
ENSG00000211772	TRBC2	TR_C_gene	61.1547	1.0338	0.285211	3.62469	0.000289312	0.00718289
ENSG00000198742	SMURF1	protein_coding	647.577	-0.884552	0.244226	-3.62186	0.000292492	0.007224
ENSG00000156973	PDE6D	protein_coding	443.051	0.495545	0.136825	3.62176	0.00029261	0.007224
ENSG00000179454	KLHL28	protein_coding	414.32	-0.455198	0.125687	-3.62168	0.000292701	0.007224
ENSG00000182287	AP1S2	protein_coding	12408.2	0.451183	0.124589	3.62137	0.000293048	0.007224
ENSG00000159131	GART	protein_coding	491.289	0.664613	0.18354	3.62108	0.000293376	0.007224
ENSG00000168439	STIP1	protein_coding	1082.88	0.498852	0.137776	3.62074	0.000293757	0.007224
ENSG00000173535	TNFRSF10C	protein_coding	452.654	0.845698	0.233598	3.62031	0.000294252	0.00722475
ENSG00000122986	HVCN1	protein_coding	1189.33	0.712982	0.197041	3.61845	0.000296376	0.00724515
ENSG00000080819	CPOX	protein_coding	370.8	0.589151	0.162823	3.61836	0.00029647	0.00724515
ENSG00000068745	IP6K2	protein_coding	759.982	-0.439623	0.121521	-3.61767	0.000297272	0.00724515
ENSG00000136870	ZNF189	protein_coding	114.963	0.580932	0.16059	3.61748	0.000297479	0.00724515
ENSG00000177191	B3GNT8	protein_coding	78.7945	0.920936	0.254592	3.61729	0.0002977	0.00724515
ENSG00000151743	AMN1	protein_coding	31.014	0.692521	0.191456	3.61714	0.00029788	0.00724515
ENSG00000130203	APOE	protein_coding	4.67448	-1.08546	0.300132	-3.61663	0.000298461	NA
ENSG00000145740	SLC30A5	protein_coding	496.547	0.370687	0.102496	3.6166	0.000298502	0.00724895
ENSG00000164556	FAM183B	protein_coding	4.93189	-1.09349	0.302389	-3.61616	0.000299004	NA
ENSG00000196418	ZNF124	protein_coding	145.816	-0.728397	0.201459	-3.61561	0.000299646	0.00726335
ENSG00000198736	MSRB1	protein_coding	2604.47	0.735609	0.203472	3.61527	0.000300031	0.00726335
ENSG00000213923	CSNK1E	protein_coding	560.619	-0.556204	0.153886	-3.61438	0.000301064	0.00727704
ENSG00000076604	TRAF4	protein_coding	156.941	-0.909802	0.251783	-3.61343	0.000302167	0.00729237
ENSG00000215251	FASTKD5	protein_coding	835.699	-0.552956	0.153096	-3.61182	0.00030406	0.00732668
ENSG00000163159	VPS72	protein_coding	399.51	0.711455	0.197148	3.60874	0.000307687	0.00740259
ENSG00000167604	NFKBID	protein_coding	1138.49	-1.0091	0.279694	-3.60789	0.0003087	0.00741548
ENSG00000117226	GBP3	protein_coding	415.934	0.838978	0.23257	3.60742	0.00030926	0.00741747
ENSG00000055147	FAM114A2	protein_coding	288.898	0.576812	0.159974	3.60567	0.000311349	0.00745606
ENSG00000100441	KHNYN	protein_coding	1547.81	-0.429697	0.119208	-3.6046	0.000312638	0.00747542
ENSG00000047249	ATP6V1H	protein_coding	611.215	0.411683	0.114269	3.60277	0.000314848	0.00751669
ENSG00000155846	PPARGC1B	protein_coding	674.334	-0.628542	0.174499	-3.60197	0.000315812	0.00752815
ENSG00000172264	MACROD2	protein_coding	3.97174	1.09336	0.303673	3.60045	0.000317666	NA
ENSG00000100393	EP300	protein_coding	5298.65	-0.617833	0.17162	-3.60001	0.0003182	0.00757345
ENSG00000173338	KCNK7	protein_coding	58.687	-0.904117	0.251186	-3.5994	0.000318954	0.00757979
ENSG00000172716	SLFN11	protein_coding	1499.27	0.505067	0.140403	3.59727	0.000321577	0.00762682
ENSG00000126804	ZBTB1	protein_coding	1666.96	-0.447371	0.124379	-3.59682	0.000322126	0.00762682
ENSG00000115904	SOS1	protein_coding	1048.23	0.612522	0.170341	3.59586	0.000323316	0.00762682
ENSG00000242689	CNTF	protein_coding	34.8376	-0.971236	0.270101	-3.59582	0.000323373	0.00762682
ENSG00000174032	SLC25A30	protein_coding	443.273	-0.48962	0.136171	-3.59564	0.000323597	0.00762682
ENSG00000231680	AP003774.6	lincRNA	138.28	0.765377	0.212876	3.59541	0.000323877	0.00762682
ENSG00000158864	NDUFS2	protein_coding	1675.77	0.452485	0.125877	3.59466	0.000324815	0.00763324
ENSG00000129450	SIGLEC9	protein_coding	1468.35	0.380243	0.105787	3.59441	0.000325132	0.00763324
ENSG00000141699	FAM134C	protein_coding	684.358	0.588669	0.163808	3.59364	0.000326087	0.00764411
ENSG00000095002	MSH2	protein_coding	111.557	0.836091	0.232811	3.59128	0.000329054	0.00770206
ENSG00000151893	CACUL1	protein_coding	1693.7	-0.501703	0.139723	-3.59069	0.000329806	0.00770803
ENSG00000007129	CEACAM21	protein_coding	61.2109	0.882923	0.245924	3.59023	0.000330388	0.00771005
ENSG00000035720	STAP1	protein_coding	9.8551	1.08882	0.30341	3.58862	0.000332429	0.00772207
ENSG00000109670	FBXW7	protein_coding	1506.67	-0.55376	0.154332	-3.5881	0.000333094	0.00772207
ENSG00000084733	RAB10	protein_coding	3752.01	0.755224	0.21049	3.58794	0.000333302	0.00772207
ENSG00000196756	SNHG17	processed_transcript	271.021	-0.656567	0.182994	-3.58792	0.000333328	0.00772207
ENSG00000116731	PRDM2	protein_coding	1371.19	-0.612537	0.170724	-3.58787	0.000333387	0.00772207
ENSG00000102524	TNFSF13B	protein_coding	5927.34	0.548332	0.152869	3.58694	0.000334577	0.00773809
ENSG00000037897	METTL1	protein_coding	41.9605	-0.821864	0.22928	-3.58454	0.00033767	0.00779803
ENSG00000028528	SNX1	protein_coding	2692.03	0.584467	0.163118	3.58309	0.000339547	0.00781924
ENSG00000110077	MS4A6A	protein_coding	15240.3	0.504498	0.140802	3.58304	0.000339618	0.00781924
ENSG00000121022	COPS5	protein_coding	661.764	0.439273	0.12261	3.58267	0.000340098	0.00781924
ENSG00000205885	C1RL-AS1	antisense	78.5881	-0.952962	0.266048	-3.58192	0.000341077	0.00783015
ENSG00000080189	SLC35C2	protein_coding	910.716	0.338191	0.0944441	3.58086	0.000342469	0.00785052
ENSG00000248334	WHAMMP2	transcribed_unprocessed_pseudogene	42.1707	-0.81058	0.226482	-3.579	0.00034491	0.00788415
ENSG00000067365	METTL22	protein_coding	365.155	-0.348716	0.0974548	-3.57824	0.000345918	0.00788415
ENSG00000198171	DDRGK1	protein_coding	802.473	0.488403	0.136502	3.57799	0.00034625	0.00788415
ENSG00000143514	TP53BP2	protein_coding	1578.01	-0.762	0.212973	-3.57792	0.000346345	0.00788415
ENSG00000152382	TADA1	protein_coding	287.349	-0.578949	0.161816	-3.57782	0.000346472	0.00788415
ENSG00000126775	ATG14	protein_coding	543.51	-0.578106	0.161714	-3.57485	0.000350423	0.00796238
ENSG00000135899	SP110	protein_coding	1882.75	0.647528	0.181223	3.5731	0.000352778	0.00799821
ENSG00000019102	VSIG2	protein_coding	122.528	-0.67541	0.189036	-3.57292	0.000353029	0.00799821
ENSG00000168016	TRANK1	protein_coding	849.583	0.737133	0.206381	3.57171	0.000354659	0.00801066
ENSG00000241258	CRCP	protein_coding	651.003	-0.539197	0.150974	-3.57145	0.000355012	0.00801066
ENSG00000132256	TRIM5	protein_coding	463.649	0.819464	0.229454	3.57137	0.000355125	0.00801066
ENSG00000133226	SRRM1	protein_coding	2048.96	-0.411326	0.115215	-3.57006	0.000356897	0.00803717
ENSG00000121671	CRY2	protein_coding	726.992	-0.922171	0.25833	-3.56974	0.000357334	0.00803717
ENSG00000196329	GIMAP5	protein_coding	327.517	0.960133	0.269067	3.56837	0.000359203	0.00804739
ENSG00000272768	RP4-673M15.1	antisense	22.0086	-0.937536	0.262745	-3.56823	0.0003594	0.00804739
ENSG00000139194	RBP5	protein_coding	34.682	-1.05036	0.294389	-3.56792	0.000359826	0.00804739
ENSG00000236199	RP11-264I13.2	antisense	74.039	-0.702037	0.196765	-3.5679	0.00035986	0.00804739
ENSG00000036448	MYOM2	protein_coding	24.092	1.06215	0.297974	3.56457	0.000364453	0.00813839
ENSG00000136514	RTP4	protein_coding	83.5215	0.796659	0.223598	3.56291	0.000366767	0.00817832
ENSG00000120948	TARDBP	protein_coding	635.4	0.457038	0.128301	3.56224	0.000367708	0.00818757
ENSG00000171497	PPID	protein_coding	351.742	0.500679	0.140587	3.56135	0.000368951	0.00820349
ENSG00000267702	RP11-53B2.2	sense_intronic	16.4811	-0.994325	0.279312	-3.5599	0.000370992	0.00822043
ENSG00000133835	HSD17B4	protein_coding	2653.27	0.518848	0.145762	3.55955	0.000371489	0.00822043
ENSG00000130038	CRACR2A	protein_coding	329.008	-0.385312	0.108254	-3.55932	0.000371813	0.00822043
ENSG00000068394	GPKOW	protein_coding	346.732	0.546481	0.153535	3.55931	0.000371829	0.00822043
ENSG00000137806	NDUFAF1	protein_coding	192.949	0.798326	0.224397	3.55766	0.00037418	0.00822767
ENSG00000147421	HMBOX1	protein_coding	512.433	-0.565627	0.158992	-3.5576	0.000374266	0.00822767
ENSG00000246334	PRR7-AS1	antisense	56.0543	-1.0196	0.286606	-3.55748	0.000374433	0.00822767
ENSG00000109971	HSPA8	protein_coding	11640	0.595829	0.167512	3.55692	0.000375223	0.00822767
ENSG00000006634	DBF4	protein_coding	193.647	-0.810287	0.227822	-3.55667	0.000375583	0.00822767
ENSG00000243646	IL10RB	protein_coding	1524.97	0.513644	0.144424	3.55651	0.000375811	0.00822767
ENSG00000141446	ESCO1	protein_coding	606.48	-0.732052	0.205836	-3.55648	0.000375862	0.00822767
ENSG00000177426	TGIF1	protein_coding	886.735	-0.720282	0.202699	-3.55346	0.000380203	0.00831098
ENSG00000135974	C2orf49	protein_coding	527.046	-0.433996	0.122149	-3.55299	0.000380879	0.00831407
ENSG00000170385	SLC30A1	protein_coding	1767.67	-0.510425	0.143689	-3.55229	0.000381888	0.0083244
ENSG00000105821	DNAJC2	protein_coding	487.652	-0.616681	0.173627	-3.55176	0.000382665	0.00832967
ENSG00000131379	C3orf20	protein_coding	8.27656	-1.02241	0.287913	-3.5511	0.000383632	0.00833902
ENSG00000143297	FCRL5	protein_coding	13.16	1.07837	0.303723	3.55052	0.000384476	0.0083457
ENSG00000273559	CWC25	protein_coding	1242.05	-0.863667	0.243284	-3.55003	0.000385189	0.00834952
ENSG00000169813	HNRNPF	protein_coding	4146.84	0.406915	0.114648	3.54925	0.000386331	0.00836262
ENSG00000189079	ARID2	protein_coding	632.663	-0.560376	0.157924	-3.54839	0.000387595	0.00837832
ENSG00000237765	FAM200B	protein_coding	702.183	0.440398	0.124129	3.54791	0.000388294	0.00838176
ENSG00000124256	ZBP1	protein_coding	239.794	0.946673	0.266947	3.5463	0.000390683	0.00842162
ENSG00000141994	DUS3L	protein_coding	533.727	-0.659551	0.186029	-3.54543	0.000391974	0.00843283
ENSG00000171055	FEZ2	protein_coding	786.061	0.386027	0.108887	3.54522	0.000392288	0.00843283
ENSG00000151952	TMEM132D	protein_coding	12.5837	-0.910084	0.256802	-3.54392	0.000394232	0.00846293
ENSG00000139645	ANKRD52	protein_coding	662.886	-0.536953	0.151531	-3.54353	0.000394805	0.00846353
ENSG00000255198	SNHG9	lincRNA	83.7209	-0.816453	0.230511	-3.54192	0.000397222	0.00849673
ENSG00000173889	PHC3	protein_coding	1259.85	-0.576682	0.162842	-3.54137	0.000398058	0.00849673
ENSG00000129315	CCNT1	protein_coding	874.26	-0.776332	0.21923	-3.54118	0.00039834	0.00849673
ENSG00000162236	STX5	protein_coding	1000.57	0.397379	0.112221	3.54105	0.000398541	0.00849673
ENSG00000176974	SHMT1	protein_coding	176.241	0.832627	0.235281	3.53887	0.000401848	0.00855551
ENSG00000262484	CCER2	protein_coding	4.07284	-1.06666	0.301473	-3.53816	0.000402923	NA
ENSG00000158793	NIT1	protein_coding	426.729	0.559731	0.158256	3.53688	0.000404885	0.00860786
ENSG00000168995	SIGLEC7	protein_coding	703.737	0.494901	0.139939	3.53653	0.000405415	0.00860786
ENSG00000263847	RP11-143J12.3	antisense	22.0921	-1.03631	0.29314	-3.53519	0.00040748	0.00863798
ENSG00000148153	INIP	protein_coding	610.693	0.343052	0.0970475	3.53489	0.000407945	0.00863798
ENSG00000214765	SEPT7P2	transcribed_unprocessed_pseudogene	196.964	-0.77207	0.2185	-3.5335	0.000410089	0.00867069
ENSG00000205155	PSENEN	protein_coding	186.18	0.547774	0.155037	3.53317	0.000410605	0.00867069
ENSG00000152409	JMY	protein_coding	462.499	-0.533616	0.151049	-3.53273	0.000411286	0.00867328
ENSG00000139354	GAS2L3	protein_coding	110.536	-1.04887	0.296965	-3.53197	0.000412474	0.00868656
ENSG00000135632	SMYD5	protein_coding	103.428	-0.47278	0.133885	-3.53124	0.000413611	0.00869869
ENSG00000118961	C2orf43	protein_coding	105.051	0.547744	0.155137	3.53071	0.000414447	0.00870452
ENSG00000164024	METAP1	protein_coding	727.427	0.37542	0.106344	3.53025	0.000415163	0.00870777
ENSG00000138646	HERC5	protein_coding	678.308	1.05155	0.297944	3.52937	0.000416547	0.00872504
ENSG00000153767	GTF2E1	protein_coding	123.753	0.617698	0.175066	3.52838	0.000418111	0.008746
ENSG00000177374	HIC1	protein_coding	151.827	-1.06865	0.303006	-3.52684	0.000420559	0.00877591
ENSG00000165511	C10orf25	protein_coding	89.5934	-0.813287	0.230604	-3.52677	0.00042067	0.00877591
ENSG00000277734	TRAC	TR_C_gene	37.0817	1.05554	0.299391	3.52562	0.000422491	0.00880208
ENSG00000131051	RBM39	protein_coding	7883.91	-0.766395	0.217415	-3.52504	0.000423416	0.00880955
ENSG00000165271	NOL6	protein_coding	644.616	-0.431868	0.122562	-3.52366	0.000425629	0.00883857
ENSG00000162869	PPP1R21	protein_coding	734.015	0.461465	0.130982	3.52311	0.000426519	0.00883857
ENSG00000033327	GAB2	protein_coding	4667.46	-0.526948	0.149572	-3.52303	0.000426646	0.00883857
ENSG00000139718	SETD1B	protein_coding	1826.95	-0.472379	0.134094	-3.52276	0.000427086	0.00883857
ENSG00000137817	PARP6	protein_coding	1127.81	-0.502097	0.142559	-3.52203	0.000428254	0.00885097
ENSG00000166750	SLFN5	protein_coding	786.036	0.858805	0.243882	3.5214	0.000429283	0.00886045
ENSG00000181704	YIPF6	protein_coding	359.59	0.471773	0.134013	3.52036	0.000430957	0.00887534
ENSG00000109586	GALNT7	protein_coding	755.648	0.53188	0.151092	3.52025	0.000431147	0.00887534
ENSG00000136631	VPS45	protein_coding	812.339	0.390306	0.110894	3.51963	0.000432146	0.00888415
ENSG00000100147	CCDC134	protein_coding	78.7516	-0.700402	0.199063	-3.51849	0.000434004	0.00890544
ENSG00000270550	IGHV3-30	IG_V_gene	3.76963	1.01849	0.289493	3.5182	0.000434479	NA
ENSG00000131779	PEX11B	protein_coding	278.031	0.658445	0.187155	3.51817	0.000434527	0.00890544
ENSG00000135622	SEMA4F	protein_coding	12.3893	0.906651	0.257721	3.51795	0.000434901	0.00890544
ENSG00000260006	RP11-469M7.1	lincRNA	241.371	-0.925535	0.263136	-3.51733	0.000435908	0.00891433
ENSG00000196110	ZNF699	protein_coding	89.3927	-0.641926	0.182593	-3.51562	0.000438735	0.00896033
ENSG00000101216	GMEB2	protein_coding	647.873	-0.759261	0.216008	-3.51496	0.000439823	0.00897078
ENSG00000176472	ZNF575	protein_coding	24.1659	0.72751	0.207029	3.51404	0.00044134	0.00898678
ENSG00000173914	RBM4B	protein_coding	107.492	0.624746	0.177798	3.51379	0.000441764	0.00898678
ENSG00000135503	ACVR1B	protein_coding	935.264	-0.653658	0.186068	-3.513	0.000443076	0.00900169
ENSG00000179921	GPBAR1	protein_coding	1078.96	0.78604	0.223794	3.51234	0.000444172	0.00901216
ENSG00000008323	PLEKHG6	protein_coding	18.9578	-0.929286	0.264659	-3.51125	0.000446001	0.00903688
ENSG00000134061	CD180	protein_coding	412.786	0.921499	0.262466	3.51092	0.000446553	0.00903688
ENSG00000105173	CCNE1	protein_coding	19.5223	-0.835662	0.238127	-3.50931	0.000449275	0.00907252
ENSG00000148154	UGCG	protein_coding	548.382	-0.593402	0.1691	-3.50918	0.000449482	0.00907252
ENSG00000138138	ATAD1	protein_coding	362.895	0.441966	0.126009	3.50742	0.000452468	0.00911344
ENSG00000153130	SCOC	protein_coding	369.873	0.682949	0.194722	3.5073	0.000452681	0.00911344
ENSG00000124786	SLC35B3	protein_coding	295.179	0.483604	0.137983	3.50481	0.000456934	0.00918716
ENSG00000231852	CYP21A2	protein_coding	2.21339	-1.03963	0.296629	-3.50481	0.000456934	NA
ENSG00000163013	FBXO41	protein_coding	819.885	-0.436371	0.124545	-3.50372	0.000458811	0.00921297
ENSG00000025800	KPNA6	protein_coding	924.164	-0.398678	0.113817	-3.50279	0.000460414	0.00923042
ENSG00000121931	LRIF1	protein_coding	79.1125	0.673707	0.192353	3.50245	0.000461001	0.00923042
ENSG00000162777	DENND2D	protein_coding	365.958	0.466776	0.133281	3.50218	0.000461461	0.00923042
ENSG00000068079	IFI35	protein_coding	1443.23	0.816871	0.233402	3.49985	0.000465519	0.00929961
ENSG00000163449	TMEM169	protein_coding	13.9101	0.923959	0.264046	3.49924	0.000466589	0.00930733
ENSG00000177628	GBA	protein_coding	1028.09	0.531671	0.151962	3.49872	0.000467492	0.00930733
ENSG00000154124	OTULIN	protein_coding	983.782	-0.602789	0.1723	-3.49849	0.000467907	0.00930733
ENSG00000231611	AP006216.11	lincRNA	45.4521	-0.864279	0.247061	-3.49823	0.000468351	0.00930733
ENSG00000163755	HPS3	protein_coding	917.102	0.322718	0.0922675	3.49763	0.000469403	0.00930733
ENSG00000196510	ANAPC7	protein_coding	297.129	0.503121	0.143848	3.49758	0.000469498	0.00930733
ENSG00000185885	IFITM1	protein_coding	272.445	1.06108	0.303422	3.49704	0.000470455	0.00930754
ENSG00000092148	HECTD1	protein_coding	2054.18	-0.521765	0.149218	-3.49667	0.000471103	0.00930754
ENSG00000066654	THUMPD1	protein_coding	1250.75	-0.338351	0.0967683	-3.49651	0.000471395	0.00930754
ENSG00000252061	RNU6-415P	snRNA	86.8844	-0.817976	0.23396	-3.49622	0.000471905	0.00930754
ENSG00000188428	BLOC1S5	protein_coding	143.811	0.660168	0.188929	3.49426	0.000475379	0.00936418
ENSG00000133773	CCDC59	protein_coding	856.867	-0.471287	0.134906	-3.49345	0.00047683	0.00938088
ENSG00000075945	KIFAP3	protein_coding	97.1103	0.430302	0.123223	3.49207	0.000479297	0.00940023
ENSG00000129515	SNX6	protein_coding	2148.12	0.445276	0.127515	3.49194	0.000479522	0.00940023
ENSG00000012983	MAP4K5	protein_coding	491.627	-0.523399	0.149913	-3.49136	0.000480571	0.00940023
ENSG00000131069	ACSS2	protein_coding	1403.15	0.349455	0.100094	3.49128	0.000480705	0.00940023
ENSG00000137965	IFI44	protein_coding	1775.54	1.00295	0.287305	3.49088	0.000481426	0.00940023
ENSG00000175216	CKAP5	protein_coding	676.678	0.381369	0.109247	3.49087	0.000481443	0.00940023
ENSG00000108592	FTSJ3	protein_coding	676.321	0.474756	0.136034	3.48998	0.000483052	0.00941981
ENSG00000167074	TEF	protein_coding	110.074	-0.771362	0.221091	-3.48888	0.000485045	0.00944682
ENSG00000130338	TULP4	protein_coding	431.676	-0.486338	0.139412	-3.48851	0.000485726	0.00944826
ENSG00000178381	ZFAND2A	protein_coding	571.293	-0.55867	0.16018	-3.48777	0.000487066	0.00945264
ENSG00000175556	LONRF3	protein_coding	223.231	-0.972042	0.278745	-3.48721	0.000488092	0.00945264
ENSG00000236438	FAM157A	lincRNA	18.6505	-0.979156	0.280792	-3.48713	0.000488235	0.00945264
ENSG00000219626	FAM228B	protein_coding	131.069	-0.501926	0.143956	-3.48665	0.000489109	0.00945264
ENSG00000173480	ZNF417	protein_coding	140.03	-0.810771	0.232553	-3.48639	0.000489588	0.00945264
ENSG00000101146	RAE1	protein_coding	568.283	-0.539852	0.154846	-3.48638	0.000489601	0.00945264
ENSG00000101187	SLCO4A1	protein_coding	7.29058	-1.04535	0.299951	-3.48507	0.000491999	0.00948717
ENSG00000138413	IDH1	protein_coding	1551.2	0.706946	0.2029	3.4842	0.000493607	0.00950636
ENSG00000166747	AP1G1	protein_coding	1628.95	-0.80672	0.231566	-3.48375	0.000494432	0.0095066
ENSG00000172409	CLP1	protein_coding	405.409	-0.583991	0.167643	-3.48353	0.000494842	0.0095066
ENSG00000196387	ZNF140	protein_coding	83.1037	0.58847	0.168957	3.48296	0.00049591	0.00951535
ENSG00000198417	MT1F	protein_coding	89.31	0.792395	0.227538	3.48248	0.000496794	0.00952056
ENSG00000139410	SDSL	protein_coding	93.8568	0.681686	0.195795	3.48163	0.000498371	0.00952518
ENSG00000279561	AL845472.1	pseudogene	11.378	0.875524	0.251478	3.4815	0.000498604	0.00952518
ENSG00000123352	SPATS2	protein_coding	86.1717	-0.512502	0.147213	-3.48136	0.000498874	0.00952518
ENSG00000165118	C9orf64	protein_coding	181.637	0.822486	0.236382	3.47948	0.000502388	0.0095805
ENSG00000100330	MTMR3	protein_coding	448.77	-0.603553	0.17354	-3.47788	0.000505395	0.00962604
ENSG00000117676	RPS6KA1	protein_coding	4381.24	0.545723	0.156983	3.47633	0.000508334	0.00965486
ENSG00000029363	BCLAF1	protein_coding	5089.98	-0.631716	0.181722	-3.47629	0.000508407	0.00965486
ENSG00000124789	NUP153	protein_coding	1074.82	-0.671466	0.193178	-3.47588	0.000509176	0.00965486
ENSG00000166170	BAG5	protein_coding	1283.07	-0.407216	0.117159	-3.47577	0.000509393	0.00965486
ENSG00000163739	CXCL1	protein_coding	457.389	-0.997411	0.287042	-3.47479	0.00051126	0.00966068
ENSG00000165943	MOAP1	protein_coding	1076.84	-0.558198	0.160645	-3.47473	0.000511372	0.00966068
ENSG00000136147	PHF11	protein_coding	1183.43	0.522763	0.150452	3.47463	0.000511565	0.00966068
ENSG00000168300	PCMTD1	protein_coding	1002.86	0.480662	0.138349	3.47426	0.00051227	0.00966225
ENSG00000134955	SLC37A2	protein_coding	2100.57	0.56267	0.161997	3.47333	0.000514043	0.00968036
ENSG00000185127	C6orf120	protein_coding	483.618	0.34531	0.0994239	3.4731	0.000514475	0.00968036
ENSG00000184389	A3GALT2	protein_coding	6.74951	-1.02557	0.29539	-3.47193	0.000516738	0.00970736
ENSG00000162461	SLC25A34	protein_coding	57.3103	-0.876104	0.252355	-3.47171	0.00051716	0.00970736
ENSG00000009790	TRAF3IP3	protein_coding	1774.45	0.482872	0.139125	3.47078	0.00051895	0.00972306
ENSG00000155959	VBP1	protein_coding	587.981	0.493689	0.142248	3.47063	0.000519247	0.00972306
ENSG00000167977	KCTD5	protein_coding	895.604	-0.537059	0.154842	-3.46843	0.000523514	0.00977486
ENSG00000276672	RP11-142E9.1	sense_intronic	32.0539	-0.86554	0.249577	-3.46803	0.000524295	0.00977486
ENSG00000069431	ABCC9	protein_coding	149.573	-0.805505	0.232285	-3.46775	0.000524832	0.00977485
ENSG00000138642	HERC6	protein_coding	309.346	0.884394	0.255045	3.4676	0.000525131	0.00977486
ENSG00000204209	DAXX	protein_coding	657.138	0.660867	0.190584	3.46759	0.000525158	0.00977486
ENSG00000164597	COG5	protein_coding	786.24	0.367841	0.106106	3.46672	0.000526859	0.009789
ENSG00000182154	MRPL41	protein_coding	421.567	0.486343	0.140296	3.46655	0.000527177	0.009789
ENSG00000171453	POLR1C	protein_coding	141.186	-0.779734	0.225091	-3.46408	0.000532056	0.00985168
ENSG00000177173	NAP1L4P1	processed_pseudogene	79.3356	-1.05138	0.303514	-3.46403	0.000532155	0.00985168
ENSG00000102805	CLN5	protein_coding	149.172	0.454272	0.131146	3.46387	0.000532455	0.00985168
ENSG00000162600	OMA1	protein_coding	192.454	0.604717	0.174706	3.46134	0.000537486	0.00992472
ENSG00000152147	GEMIN6	protein_coding	90.6055	0.738648	0.213405	3.46125	0.00053768	0.00992472
ENSG00000145439	CBR4	protein_coding	154.13	0.624685	0.180501	3.46084	0.000538487	0.00992783
ENSG00000028310	BRD9	protein_coding	753.246	-0.282096	0.0815263	-3.46019	0.0005398	0.00993174
ENSG00000244242	IFITM10	protein_coding	99.6303	-0.975188	0.28184	-3.46007	0.000540026	0.00993174
ENSG00000164219	PGGT1B	protein_coding	737.476	-0.436449	0.126149	-3.45978	0.000540616	0.00993174
ENSG00000223704	LINC01422	lincRNA	9.32251	-0.92238	0.266637	-3.45931	0.000541559	0.00993325
ENSG00000115415	STAT1	protein_coding	7558.69	0.810244	0.234235	3.4591	0.000541977	0.00993325
ENSG00000243708	PLA2G4B	protein_coding	11.2551	-1.0181	0.294382	-3.45843	0.000543325	0.00993943
ENSG00000104983	CCDC61	protein_coding	160.564	0.577342	0.166944	3.4583	0.000543593	0.00993943
ENSG00000135148	TRAFD1	protein_coding	1660.14	0.663881	0.192038	3.45702	0.000546175	0.00997492
ENSG00000172005	MAL	protein_coding	9.00832	1.03959	0.300846	3.45557	0.000549126	0.010017
ENSG00000178458	H3F3AP6	processed_pseudogene	6.66927	1.01873	0.294874	3.45482	0.000550659	0.0100231
ENSG00000138496	PARP9	protein_coding	2475.48	0.871573	0.252299	3.45453	0.000551253	0.0100231
ENSG00000175591	P2RY2	protein_coding	402.883	-0.650365	0.188268	-3.45446	0.000551391	0.0100231
ENSG00000106246	PTCD1	protein_coding	56.9987	-0.514116	0.148856	-3.45378	0.000552783	0.0100352
ENSG00000111671	SPSB2	protein_coding	129.838	0.738804	0.213946	3.45322	0.000553927	0.0100352
ENSG00000215114	UBXN2B	protein_coding	1396.49	0.484891	0.140418	3.45319	0.000553996	0.0100352
ENSG00000069509	FUNDC1	protein_coding	95.5675	0.581725	0.168507	3.45224	0.000555953	0.0100589
ENSG00000275835	TUBGCP5	protein_coding	142.008	-0.654562	0.189645	-3.45152	0.000557442	0.0100711
ENSG00000168394	TAP1	protein_coding	3062.16	0.755302	0.218846	3.45129	0.000557921	0.0100711
ENSG00000113552	GNPDA1	protein_coding	615.438	0.570409	0.165346	3.44979	0.000561017	0.0101051
ENSG00000136159	NUDT15	protein_coding	331.425	-0.392691	0.113832	-3.44975	0.000561106	0.0101051
ENSG00000118655	DCLRE1B	protein_coding	239.33	0.671263	0.194643	3.44869	0.000563314	0.0101331
ENSG00000184730	APOBR	protein_coding	3910.57	0.456253	0.132348	3.44739	0.000566042	0.0101603
ENSG00000184305	CCSER1	protein_coding	16.7836	-0.842742	0.244461	-3.44734	0.000566132	0.0101603
ENSG00000131188	PRR7	protein_coding	101.886	-0.869728	0.252381	-3.44609	0.000568765	0.0101958
ENSG00000026103	FAS	protein_coding	875.645	0.539614	0.156612	3.44554	0.000569923	0.0102048
ENSG00000116906	GNPAT	protein_coding	951.552	0.419661	0.1219	3.44266	0.000576023	0.0103021
ENSG00000101464	PIGU	protein_coding	98.7916	0.608554	0.176815	3.44175	0.000577968	0.0103165
ENSG00000167136	ENDOG	protein_coding	56.4365	0.688435	0.200044	3.44141	0.000578687	0.0103165
ENSG00000100342	APOL1	protein_coding	749.239	0.731022	0.212423	3.44135	0.000578818	0.0103165
ENSG00000255004	RP1-68D18.3	antisense	2.65509	-0.970672	0.282192	-3.43976	0.000582237	NA
ENSG00000171204	TMEM126B	protein_coding	491.942	0.40429	0.117538	3.43967	0.000582424	0.0103689
ENSG00000137337	MDC1	protein_coding	149.877	-0.628678	0.182796	-3.43923	0.000583366	0.0103738
ENSG00000278493	CTD-2382E5.6	sense_intronic	11.2411	-1.04117	0.302818	-3.43825	0.00058548	0.0103995
ENSG00000162139	NEU3	protein_coding	478.979	-0.721086	0.209747	-3.43789	0.000586276	0.0104017
ENSG00000096063	SRPK1	protein_coding	429.323	0.351511	0.102287	3.43653	0.000589222	0.0104421
ENSG00000256185	RP11-612B6.2	3prime_overlapping_ncrna	2.12363	1.03643	0.301597	3.43648	0.000589329	NA
ENSG00000085719	CPNE3	protein_coding	2201.36	0.490424	0.142845	3.43325	0.000596389	0.0105482
ENSG00000171604	CXXC5	protein_coding	1248.7	-0.836726	0.243729	-3.43302	0.00059691	0.0105482
ENSG00000118007	STAG1	protein_coding	651.049	-0.306227	0.0892163	-3.43242	0.000598225	0.0105482
ENSG00000100105	PATZ1	protein_coding	573.95	-0.415378	0.121024	-3.4322	0.000598716	0.0105482
ENSG00000134851	TMEM165	protein_coding	1613.39	0.538919	0.157024	3.43208	0.000598959	0.0105482
ENSG00000188807	TMEM201	protein_coding	122.394	-0.508061	0.148039	-3.43194	0.000599281	0.0105482
ENSG00000183826	BTBD9	protein_coding	415.362	-0.469113	0.136719	-3.43122	0.000600864	0.0105619
ENSG00000213600	XXcos-LUCA16.1	sense_intronic	8.9175	-1.02521	0.29881	-3.43097	0.000601421	0.0105619
ENSG00000063587	ZNF275	protein_coding	227.284	-0.443817	0.129371	-3.43057	0.000602311	0.0105646
ENSG00000114841	DNAH1	protein_coding	923.452	-0.805533	0.23486	-3.42985	0.000603921	0.0105646
ENSG00000113583	C5orf15	protein_coding	1795.65	0.456184	0.133008	3.42975	0.000604139	0.0105646
ENSG00000143363	PRUNE	protein_coding	287.687	0.670889	0.195613	3.42968	0.000604294	0.0105646
ENSG00000150681	RGS18	protein_coding	1243.31	0.67884	0.197962	3.42914	0.000605495	0.0105737
ENSG00000163874	ZC3H12A	protein_coding	1118.01	-0.863925	0.251965	-3.42875	0.000606378	0.0105772
ENSG00000186603	HPDL	protein_coding	6.56408	-0.997416	0.290976	-3.42783	0.000608423	0.0105968
ENSG00000122482	ZNF644	protein_coding	736.586	-0.686451	0.200287	-3.42733	0.000609544	0.0105968
ENSG00000164054	SHISA5	protein_coding	3847.49	0.701183	0.204586	3.42732	0.000609567	0.0105968
ENSG00000269937	RP11-20I23.8	antisense	138.751	-0.717345	0.20932	-3.42703	0.000610224	0.0105968
ENSG00000261799	RP11-283I3.6	sense_overlapping	50.0205	0.800725	0.233708	3.42617	0.000612159	0.0106064
ENSG00000081041	CXCL2	protein_coding	1370.44	-1.03988	0.303543	-3.42582	0.000612957	0.0106063
ENSG00000197976	AKAP17A	protein_coding	2488.94	-0.413196	0.120618	-3.42566	0.000613314	0.0106064
ENSG00000134882	UBAC2	protein_coding	1418.32	0.434844	0.126941	3.42557	0.000613506	0.0106064
ENSG00000166166	TRMT61A	protein_coding	247.207	-0.520397	0.151983	-3.42405	0.000616963	0.0106543
ENSG00000151116	UEVLD	protein_coding	394.812	0.557349	0.162844	3.4226	0.000620246	0.0106991
ENSG00000108883	EFTUD2	protein_coding	2957.79	0.356691	0.104249	3.42153	0.000622705	0.0107296
ENSG00000014919	COX15	protein_coding	610.65	0.511868	0.149651	3.42042	0.000625253	0.010755
ENSG00000182180	MRPS16	protein_coding	604.869	0.418521	0.122365	3.42028	0.000625566	0.010755
ENSG00000154640	BTG3	protein_coding	134.787	-0.91921	0.268865	-3.41885	0.000628858	0.0107997
ENSG00000125779	PANK2	protein_coding	983.032	0.43734	0.127942	3.41825	0.000630251	0.0108117
ENSG00000175197	DDIT3	protein_coding	411.226	-0.825253	0.241458	-3.41779	0.000631321	0.0108135
ENSG00000153066	TXNDC11	protein_coding	1660.77	-0.631335	0.18473	-3.41761	0.000631747	0.0108135
ENSG00000185972	CCIN	protein_coding	27.9237	-0.880537	0.257697	-3.41694	0.000633283	0.0108278
ENSG00000196655	TRAPPC4	protein_coding	285.332	0.488036	0.142846	3.41652	0.000634277	0.0108329
ENSG00000171466	ZNF562	protein_coding	479.885	-0.464902	0.136113	-3.41556	0.000636518	0.0108592
ENSG00000170191	NANP	protein_coding	112.286	-0.540026	0.158169	-3.41424	0.000639599	0.0108948
ENSG00000166582	CENPV	protein_coding	25.7346	-0.754734	0.221066	-3.41407	0.000640006	0.0108948
ENSG00000157869	RAB28	protein_coding	356.239	0.447954	0.131309	3.41145	0.000646178	0.0109879
ENSG00000128908	INO80	protein_coding	1232.93	-0.318495	0.0933724	-3.41102	0.000647197	0.0109932
ENSG00000163376	KBTBD8	protein_coding	408.799	-0.961249	0.281853	-3.41047	0.00064852	0.0110036
ENSG00000146221	TCTE1	protein_coding	4.42342	-1.03157	0.302542	-3.40967	0.000650415	NA
ENSG00000213203	GIMAP1	protein_coding	755.868	0.888731	0.26072	3.40876	0.00065259	0.0110606
ENSG00000076258	FMO4	protein_coding	45.5477	0.533747	0.156636	3.40756	0.000655457	0.0110949
ENSG00000123505	AMD1	protein_coding	2265.53	-0.422373	0.123964	-3.40721	0.000656303	0.0110949
ENSG00000179978	RP11-1319K7.1	unprocessed_pseudogene	105.02	0.648863	0.190466	3.40672	0.000657482	0.0110949
ENSG00000166272	WBP1L	protein_coding	2388.39	0.486428	0.142793	3.40652	0.000657974	0.0110949
ENSG00000232956	SNHG15	lincRNA	802.309	-0.608047	0.1785	-3.40643	0.000658183	0.0110949
ENSG00000187605	TET3	protein_coding	5162.06	-0.425149	0.124823	-3.40601	0.000659189	0.0110974
ENSG00000182628	SKA2	protein_coding	280.2	0.626907	0.184081	3.4056	0.000660178	0.0110974
ENSG00000186063	AIDA	protein_coding	1043.38	0.550919	0.161774	3.40548	0.000660475	0.0110974
ENSG00000221491	SNORA34	snoRNA	16.9414	-0.800006	0.235115	-3.40262	0.000667437	0.0112023
ENSG00000023697	DERA	protein_coding	730.361	0.418407	0.123007	3.40148	0.000670225	0.0112253
ENSG00000182484	WASH6P	transcribed_unprocessed_pseudogene	410.425	-0.686273	0.20176	-3.40143	0.000670333	0.0112253
ENSG00000187741	FANCA	protein_coding	125.032	0.477724	0.140459	3.40117	0.000670977	0.0112253
ENSG00000262587	RP11-266L9.4	transcribed_unprocessed_pseudogene	4.01496	1.01591	0.298765	3.40035	0.000672992	NA
ENSG00000075188	NUP37	protein_coding	165.985	0.603058	0.177364	3.40012	0.000673552	0.0112555
ENSG00000166908	PIP4K2C	protein_coding	443.827	0.351088	0.103266	3.39985	0.000674231	0.0112555
ENSG00000123415	SMUG1	protein_coding	224.733	0.545166	0.160374	3.39934	0.000675495	0.0112614
ENSG00000100664	EIF5	protein_coding	5976.23	-0.719621	0.211708	-3.39912	0.000676035	0.0112615
ENSG00000206562	METTL6	protein_coding	98.8902	0.499545	0.146988	3.39854	0.00067747	0.0112638
ENSG00000038274	MAT2B	protein_coding	2207	0.617629	0.181737	3.39848	0.000677623	0.0112638
ENSG00000204977	TRIM13	protein_coding	299.501	-0.703032	0.206971	-3.39676	0.000681883	0.0113225
ENSG00000196922	ZNF252P	unitary_pseudogene	246.791	0.450376	0.132625	3.39585	0.000684154	0.0113289
ENSG00000246731	MGC16275	antisense	47.8421	0.751531	0.221309	3.39584	0.000684184	0.0113289
ENSG00000167394	ZNF668	protein_coding	126.099	-0.61742	0.181822	-3.39573	0.00068446	0.0113289
ENSG00000139193	CD27	protein_coding	4.86021	1.02046	0.300545	3.39537	0.000685349	NA
ENSG00000278991	RP11-797A18.5	TEC	19.9071	-0.951518	0.280246	-3.39529	0.000685556	0.011335
ENSG00000143149	ALDH9A1	protein_coding	910.404	0.425331	0.125361	3.39286	0.000691673	0.011424
ENSG00000172586	CHCHD1	protein_coding	378.867	0.504351	0.148716	3.39137	0.000695452	0.0114742
ENSG00000278311	GGNBP2	protein_coding	2260.13	-0.583167	0.172036	-3.38979	0.00069945	0.011528
ENSG00000100425	BRD1	protein_coding	928.04	-0.573318	0.169148	-3.38944	0.000700345	0.0115305
ENSG00000135144	DTX1	protein_coding	3.48472	1.02327	0.301937	3.38902	0.00070143	NA
ENSG00000230513	THAP7-AS1	antisense	18.225	0.762789	0.225099	3.38869	0.000702284	0.0115457
ENSG00000135766	EGLN1	protein_coding	1600.3	0.475988	0.140498	3.38787	0.000704382	0.0115457
ENSG00000119321	FKBP15	protein_coding	3930.71	0.37783	0.111529	3.38773	0.000704724	0.0115457
ENSG00000242324	RP4-576H24.2	unprocessed_pseudogene	42.736	0.672207	0.198427	3.38768	0.000704874	0.0115457
ENSG00000178127	NDUFV2	protein_coding	55.8979	-0.999256	0.294984	-3.38749	0.000705351	0.0115457
ENSG00000205846	CLEC6A	protein_coding	195.322	0.690622	0.203883	3.38734	0.00070573	0.0115457
ENSG00000142687	KIAA0319L	protein_coding	1758.31	0.417061	0.123143	3.3868	0.000707131	0.0115565
ENSG00000149131	SERPING1	protein_coding	566.806	1.0278	0.303524	3.38621	0.000708638	0.011569
ENSG00000224051	CPTP	protein_coding	230.329	0.671458	0.19831	3.3859	0.000709455	0.0115701
ENSG00000204345	CD300LD	protein_coding	16.9683	-0.862889	0.254894	-3.38528	0.000711053	0.0115841
ENSG00000132581	SDF2	protein_coding	615.61	0.377228	0.111442	3.38496	0.000711891	0.0115856
ENSG00000084073	ZMPSTE24	protein_coding	1081.1	0.474704	0.140253	3.38464	0.000712718	0.0115869
ENSG00000277496	RP11-93B14.9	antisense	59.1146	0.63099	0.186454	3.38416	0.000713967	0.0115951
ENSG00000239713	APOBEC3G	protein_coding	779.799	0.683564	0.202044	3.38325	0.000716337	0.0116214
ENSG00000172059	KLF11	protein_coding	3887.06	-0.446231	0.131951	-3.38178	0.000720169	0.0116617
ENSG00000113312	TTC1	protein_coding	574.988	0.489933	0.144877	3.38172	0.000720324	0.0116617
ENSG00000232748	RP11-196G11.6	lincRNA	33.769	-0.687291	0.203256	-3.38141	0.000721159	0.0116631
ENSG00000280020	CTD-2095E4.4	TEC	19.6624	-0.868673	0.256952	-3.38068	0.000723072	0.0116662
ENSG00000272333	KMT2B	protein_coding	1559.66	-0.446312	0.132022	-3.3806	0.000723287	0.0116662
ENSG00000105643	ARRDC2	protein_coding	2092.24	-0.389713	0.115283	-3.38048	0.000723604	0.0116662
ENSG00000159713	TPPP3	protein_coding	877.182	0.747254	0.221116	3.37946	0.000726284	0.0116896
ENSG00000232160	RAP2C-AS1	antisense	48.9699	-0.513024	0.151811	-3.37936	0.000726556	0.0116896
ENSG00000278129	ZNF8	protein_coding	102.336	-0.736518	0.218032	-3.37803	0.000730081	0.0117341
ENSG00000092067	CEBPE	protein_coding	36.8678	0.761571	0.22548	3.37755	0.000731343	0.0117423
ENSG00000101997	CCDC22	protein_coding	797.589	0.452812	0.134092	3.37688	0.00073314	0.011759
ENSG00000279179	RP11-131M11.3	TEC	17.146	-0.921058	0.272963	-3.3743	0.000740035	0.0118531
ENSG00000107937	GTPBP4	protein_coding	858.672	-0.808644	0.239661	-3.37412	0.000740534	0.0118531
ENSG00000179361	ARID3B	protein_coding	676.844	-0.711562	0.210953	-3.37308	0.000743337	0.0118858
ENSG00000086065	CHMP5	protein_coding	1106.11	0.625927	0.185627	3.37195	0.000746372	0.011912
ENSG00000051108	HERPUD1	protein_coding	3778.11	-0.549303	0.162914	-3.37175	0.000746933	0.011912
ENSG00000197380	DACT3	protein_coding	11.7964	-1.01466	0.30094	-3.37162	0.000747279	0.011912
ENSG00000276961	MIR7848	miRNA	4.71105	-1.01809	0.30199	-3.37128	0.000748194	NA
ENSG00000162851	TFB2M	protein_coding	208.811	-0.44901	0.133212	-3.37064	0.00074993	0.011942
ENSG00000127081	ZNF484	protein_coding	118.441	-0.685851	0.203498	-3.3703	0.000750864	0.0119446
ENSG00000154957	ZNF18	protein_coding	199.549	-0.422576	0.125396	-3.36994	0.000751841	0.011948
ENSG00000089057	SLC23A2	protein_coding	886.283	-0.540082	0.160283	-3.36955	0.000752902	0.0119526
ENSG00000182093	WRB	protein_coding	194.561	0.548743	0.162918	3.36821	0.000756572	0.0119986
ENSG00000121940	CLCC1	protein_coding	160.272	0.385104	0.11435	3.36778	0.000757772	0.0120054
ENSG00000164754	RAD21	protein_coding	2843.49	0.273108	0.0811251	3.36651	0.00076127	0.0120475
ENSG00000111670	GNPTAB	protein_coding	1414.15	0.447071	0.13281	3.36625	0.000761978	0.0120475
ENSG00000130935	NOL11	protein_coding	375.247	-0.619023	0.183955	-3.36508	0.000765225	0.0120865
ENSG00000182831	C16orf72	protein_coding	2709.09	-0.716125	0.212867	-3.36419	0.000767699	0.0121051
ENSG00000182400	TRAPPC6B	protein_coding	253.862	0.570615	0.169619	3.36409	0.000767957	0.0121051
ENSG00000101882	NKAP	protein_coding	302.735	0.459681	0.13668	3.3632	0.000770438	0.0121125
ENSG00000130150	MOSPD2	protein_coding	960.539	0.868899	0.258373	3.36296	0.000771103	0.0121125
ENSG00000234329	RP11-767N6.2	processed_pseudogene	19.0406	-0.902166	0.268266	-3.36295	0.000771135	0.0121125
ENSG00000196954	CASP4	protein_coding	3853.74	0.409837	0.121882	3.36258	0.000772192	0.0121125
ENSG00000143756	FBXO28	protein_coding	788.869	-0.377445	0.11225	-3.36253	0.000772327	0.0121125
ENSG00000087269	NOP14	protein_coding	429.91	-0.250093	0.0743954	-3.36168	0.000774711	0.0121307
ENSG00000238227	C9orf69	protein_coding	707.686	0.709041	0.210926	3.36156	0.000775045	0.0121307
ENSG00000279162	CTD-3126B10.2	TEC	12.9431	-0.986197	0.29342	-3.36104	0.000776508	0.0121413
ENSG00000169379	ARL13B	protein_coding	108.177	0.494327	0.147121	3.36001	0.000779412	0.0121745
ENSG00000182648	LINC01006	lincRNA	12.1017	0.94278	0.280637	3.35943	0.00078102	0.0121874
ENSG00000140750	ARHGAP17	protein_coding	1642.37	0.44864	0.133575	3.35873	0.00078303	0.0122008
ENSG00000100109	TFIP11	protein_coding	638.654	-0.657416	0.195768	-3.35814	0.000784675	0.0122008
ENSG00000085377	PREP	protein_coding	886.177	0.344304	0.10253	3.35806	0.000784914	0.0122008
ENSG00000173786	CNP	protein_coding	1205.05	0.564058	0.16799	3.35768	0.000785993	0.0122008
ENSG00000198252	STYX	protein_coding	889.681	0.464389	0.138313	3.35752	0.000786449	0.0122008
ENSG00000172367	PDZD3	protein_coding	9.80981	-0.949224	0.282759	-3.35701	0.000787907	0.0122008
ENSG00000275111	ZNF2	protein_coding	30.7132	0.766437	0.228325	3.35678	0.000788561	0.0122008
ENSG00000163536	SERPINI1	protein_coding	10.2016	0.875262	0.260759	3.35659	0.000789107	0.0122008
ENSG00000188997	KCTD21	protein_coding	107.258	0.639911	0.190664	3.35622	0.000790157	0.0122008
ENSG00000132185	FCRLA	protein_coding	14.694	1.0136	0.302007	3.35622	0.000790163	0.0122008
ENSG00000204839	MROH6	protein_coding	340.659	-0.740359	0.220601	-3.35609	0.000790518	0.0122008
ENSG00000107560	RAB11FIP2	protein_coding	565.295	-0.569432	0.169813	-3.3533	0.000798546	0.0123125
ENSG00000181418	DDN	protein_coding	5.3211	-0.99332	0.296279	-3.35265	0.000800421	0.0123235
ENSG00000197780	TAF13	protein_coding	607.93	-0.732448	0.218492	-3.35229	0.000801446	0.0123235
ENSG00000198130	HIBCH	protein_coding	114.031	0.548432	0.163602	3.35223	0.00080164	0.0123235
ENSG00000115446	UNC50	protein_coding	569.476	0.341623	0.101935	3.35137	0.000804138	0.0123497
ENSG00000106346	USP42	protein_coding	358.939	-0.700103	0.208954	-3.35051	0.000806622	0.0123747
ENSG00000089902	RCOR1	protein_coding	2564.78	-0.401272	0.119774	-3.35026	0.00080736	0.0123747
ENSG00000114956	DGUOK	protein_coding	440.846	0.398198	0.118908	3.34879	0.000811642	0.0124281
ENSG00000154473	BUB3	protein_coding	1096.67	0.279824	0.0835778	3.34807	0.000813767	0.0124484
ENSG00000128271	ADORA2A	protein_coding	15.683	-1.00885	0.301358	-3.34768	0.000814916	0.0124537
ENSG00000005812	FBXL3	protein_coding	1276.21	-0.550312	0.16441	-3.34719	0.000816364	0.0124636
ENSG00000110921	MVK	protein_coding	89.7707	0.554893	0.165819	3.34637	0.00081877	0.0124717
ENSG00000214114	MYCBP	protein_coding	452.145	0.478516	0.143007	3.34611	0.000819533	0.0124717
ENSG00000049246	PER3	protein_coding	82.8965	-0.733419	0.219189	-3.34606	0.000819679	0.0124717
ENSG00000280027	RP11-44F14.10	TEC	3.05683	1.01355	0.302919	3.34595	0.00082002	NA
ENSG00000280407	RP13-516M14.8	TEC	55.5467	-0.972256	0.290582	-3.34589	0.0008202	0.0124717
ENSG00000196591	HDAC2	protein_coding	1064.19	0.342554	0.102388	3.34565	0.000820905	0.0124717
ENSG00000111540	RAB5B	protein_coding	2467.93	0.487075	0.145609	3.3451	0.000822527	0.0124841
ENSG00000196338	NLGN3	protein_coding	21.1657	-0.824268	0.246469	-3.34431	0.000824875	0.012506
ENSG00000156928	MALSU1	protein_coding	147.554	0.393372	0.117633	3.34407	0.000825582	0.012506
ENSG00000122912	SLC25A16	protein_coding	347.067	-0.416052	0.124446	-3.34324	0.000828073	0.0125316
ENSG00000117153	KLHL12	protein_coding	752.993	0.357665	0.107	3.34266	0.0008298	0.0125455
ENSG00000225092	RP11-405O10.2	sense_intronic	3.10537	-0.995377	0.29788	-3.34154	0.000833149	NA
ENSG00000010539	ZNF200	protein_coding	68.1683	0.611933	0.183159	3.34099	0.000834806	0.0126089
ENSG00000218226	TATDN2P2	processed_pseudogene	33.1211	-0.903814	0.270582	-3.34025	0.000837015	0.012622
ENSG00000134014	ELP3	protein_coding	333.205	0.603975	0.180822	3.34016	0.000837298	0.012622
ENSG00000133104	SPG20	protein_coding	844.13	0.402252	0.120474	3.33891	0.000841085	0.0126668
ENSG00000112137	PHACTR1	protein_coding	804.036	-1.01342	0.303583	-3.33819	0.000843268	0.0126742
ENSG00000105656	ELL	protein_coding	1397.12	-0.669202	0.200481	-3.33797	0.000843918	0.0126742
ENSG00000174004	NRROS	protein_coding	2681.54	-0.646769	0.193763	-3.33794	0.000844022	0.0126742
ENSG00000135373	EHF	protein_coding	3.60498	1.01389	0.303766	3.33774	0.000844617	NA
ENSG00000228809	RP4-705D16.3	antisense	6.03867	-0.988926	0.296315	-3.33742	0.000845603	0.0126857
ENSG00000143384	MCL1	protein_coding	65533.3	-0.723991	0.217007	-3.33625	0.000849165	0.0127268
ENSG00000181284	TMEM102	protein_coding	100.349	0.692637	0.207632	3.33588	0.000850292	0.0127314
ENSG00000163346	PBXIP1	protein_coding	1524.56	0.444247	0.133219	3.33472	0.000853859	0.0127725
ENSG00000135318	NT5E	protein_coding	4.52583	1.01331	0.303887	3.3345	0.000854526	NA
ENSG00000162222	TTC9C	protein_coding	155.315	0.708479	0.212557	3.33312	0.000858769	0.0128181
ENSG00000100934	SEC23A	protein_coding	1097.97	0.350643	0.10521	3.3328	0.000859767	0.0128181
ENSG00000143622	RIT1	protein_coding	2225.44	-0.706817	0.212105	-3.33239	0.000861025	0.0128181
ENSG00000166822	TMEM170A	protein_coding	672.399	-0.672545	0.201824	-3.33234	0.000861194	0.0128181
ENSG00000198355	PIM3	protein_coding	6594.74	-0.689886	0.207036	-3.3322	0.000861621	0.0128181
ENSG00000163528	CHCHD4	protein_coding	163.76	0.610791	0.18331	3.33202	0.000862193	0.0128181
ENSG00000118508	RAB32	protein_coding	2509.16	0.481141	0.144406	3.33186	0.00086268	0.0128181
ENSG00000141582	CBX4	protein_coding	1690.67	-0.407632	0.122367	-3.33122	0.000864657	0.0128262
ENSG00000174579	MSL2	protein_coding	1494.31	-0.44371	0.1332	-3.33115	0.000864872	0.0128262
ENSG00000162654	GBP4	protein_coding	2155.73	0.867639	0.260487	3.33084	0.000865849	0.0128284
ENSG00000143155	TIPRL	protein_coding	583.438	0.498006	0.149538	3.3303	0.000867521	0.012841
ENSG00000120709	FAM53C	protein_coding	1889.87	-0.527888	0.158557	-3.32932	0.000870585	0.0128657
ENSG00000136802	LRRC8A	protein_coding	684.99	-0.628631	0.188822	-3.32924	0.000870848	0.0128657
ENSG00000266539	AC078889.1	miRNA	6.68089	-1.00319	0.301379	-3.32866	0.000872639	0.0128773
ENSG00000183486	MX2	protein_coding	4187.82	0.830922	0.249651	3.32834	0.000873657	0.0128773
ENSG00000064999	ANKS1A	protein_coding	624.211	-0.423558	0.127269	-3.32807	0.000874505	0.0128773
ENSG00000171617	ENC1	protein_coding	712.105	-0.630225	0.189383	-3.32777	0.000875426	0.0128773
ENSG00000111012	CYP27B1	protein_coding	7.35123	-0.995236	0.29908	-3.32766	0.000875784	0.0128773
ENSG00000132530	XAF1	protein_coding	679.244	0.91635	0.275395	3.3274	0.000876602	0.0128773
ENSG00000100220	RTCB	protein_coding	1407.02	0.531602	0.159787	3.32693	0.000878074	0.0128867
ENSG00000139291	TMEM19	protein_coding	316.743	0.469564	0.141156	3.32655	0.000879267	0.012892
ENSG00000165650	PDZD8	protein_coding	1577.64	-0.656227	0.197314	-3.3258	0.000881649	0.0129148
ENSG00000158109	TPRG1L	protein_coding	853.018	0.501027	0.150678	3.32515	0.000883722	0.012933
ENSG00000188735	TMEM120B	protein_coding	71.9516	-0.602705	0.181291	-3.32452	0.000885713	0.0129406
ENSG00000117228	GBP1	protein_coding	1568.17	0.942962	0.283644	3.32446	0.000885913	0.0129407
ENSG00000109016	DHRS7B	protein_coding	241.235	0.417108	0.125536	3.32261	0.000891804	0.0130103
ENSG00000035403	VCL	protein_coding	4267.03	0.45521	0.137015	3.32233	0.000892684	0.0130103
ENSG00000155827	RNF20	protein_coding	852.43	0.625432	0.188273	3.32195	0.00089392	0.0130103
ENSG00000095574	IKZF5	protein_coding	662.676	-0.612965	0.18453	-3.32176	0.000894519	0.0130103
ENSG00000113194	FAF2	protein_coding	950.07	-0.480695	0.144716	-3.32165	0.000894866	0.0130103
ENSG00000198689	SLC9A6	protein_coding	615.45	0.288326	0.0868292	3.32061	0.000898221	0.0130193
ENSG00000231663	RP5-827C21.4	antisense	24.8396	-0.629701	0.189637	-3.32055	0.00089839	0.0130193
ENSG00000198876	DCAF12	protein_coding	867.225	0.731116	0.220198	3.32027	0.000899306	0.0130193
ENSG00000280088	RP11-135F9.3	TEC	141.857	0.630979	0.190042	3.32021	0.000899497	0.0130193
ENSG00000175575	PAAF1	protein_coding	121.884	0.554361	0.166979	3.31995	0.000900338	0.0130193
ENSG00000076321	KLHL20	protein_coding	283.908	-0.393148	0.118422	-3.3199	0.000900511	0.0130193
ENSG00000102309	PIN4	protein_coding	214.641	0.546978	0.164811	3.31882	0.000903984	0.0130502
ENSG00000122705	CLTA	protein_coding	2084.52	0.456192	0.13746	3.31872	0.000904325	0.0130502
ENSG00000168246	UBTD2	protein_coding	210.708	0.462253	0.139306	3.31827	0.00090577	0.0130589
ENSG00000110958	PTGES3	protein_coding	3940.62	0.418789	0.126224	3.31782	0.00090722	0.0130677
ENSG00000185880	TRIM69	protein_coding	637.877	0.840319	0.253394	3.31626	0.000912305	0.0131287
ENSG00000160908	ZNF394	protein_coding	1438.79	-0.548227	0.165346	-3.31564	0.000914328	0.013145
ENSG00000275210	AC008984.2	processed_transcript	316.364	-0.807125	0.243462	-3.3152	0.000915782	0.013145
ENSG00000204264	PSMB8	protein_coding	3551.8	0.51718	0.156017	3.31491	0.00091674	0.013145
ENSG00000177000	MTHFR	protein_coding	1197.6	-0.57412	0.173195	-3.31488	0.000916817	0.013145
ENSG00000237437	ASS1P12	processed_pseudogene	15.1735	-0.787474	0.237615	-3.31407	0.000919478	0.0131674
ENSG00000134198	TSPAN2	protein_coding	398.653	0.711525	0.214716	3.3138	0.000920387	0.0131674
ENSG00000267350	RP1-178F10.3	processed_transcript	1349.35	-0.516195	0.155781	-3.31359	0.000921078	0.0131674
ENSG00000115649	CNPPD1	protein_coding	1889.93	0.379075	0.114408	3.31338	0.00092177	0.0131674
ENSG00000112367	FIG4	protein_coding	1366.23	0.466328	0.140761	3.3129	0.000923324	0.0131708
ENSG00000160055	TMEM234	protein_coding	102.463	0.438077	0.132238	3.31279	0.000923699	0.0131708
ENSG00000273008	RP11-351D16.3	lincRNA	17.2111	-0.810659	0.244766	-3.31197	0.00092642	0.0131871
ENSG00000183569	SERHL2	protein_coding	26.599	-0.865178	0.261231	-3.31193	0.000926542	0.0131871
ENSG00000023445	BIRC3	protein_coding	1269.47	-0.569481	0.171971	-3.3115	0.000927969	0.0131953
ENSG00000101347	SAMHD1	protein_coding	18570.8	0.606507	0.183194	3.31074	0.000930511	0.0132194
ENSG00000130303	BST2	protein_coding	2990.78	0.587721	0.17755	3.31017	0.000932399	0.0132341
ENSG00000165219	GAPVD1	protein_coding	1146.17	-0.430929	0.1302	-3.30975	0.000933786	0.0132403
ENSG00000015676	NUDCD3	protein_coding	776.878	0.299635	0.0905373	3.30953	0.000934541	0.0132403
ENSG00000269728	RP11-145M9.4	lincRNA	492.46	0.467658	0.141383	3.30773	0.00094056	0.0133135
ENSG00000134864	GGACT	protein_coding	95.3669	0.565126	0.170909	3.30658	0.000944412	0.0133558
ENSG00000151240	DIP2C	protein_coding	3.30056	1.00173	0.30297	3.30637	0.000945144	NA
ENSG00000145632	PLK2	protein_coding	605.392	-0.95038	0.287512	-3.30553	0.000947971	0.013394
ENSG00000072364	AFF4	protein_coding	2154.72	-0.689674	0.2087	-3.30462	0.000951052	0.0134253
ENSG00000167721	TSR1	protein_coding	331.431	-0.315909	0.09561	-3.30414	0.000952692	0.0134362
ENSG00000120265	PCMT1	protein_coding	1772.89	0.570051	0.172564	3.30342	0.000955123	0.0134583
ENSG00000012963	UBR7	protein_coding	450.564	0.490813	0.148626	3.30233	0.000958855	0.0134987
ENSG00000264056	MIR5685	miRNA	2.14621	-0.984901	0.298268	-3.30207	0.000959745	NA
ENSG00000113407	TARS	protein_coding	771.946	0.378096	0.114505	3.30201	0.000959943	0.0135017
ENSG00000154781	CCDC174	protein_coding	390.46	-0.424184	0.128482	-3.3015	0.00096168	0.013514
ENSG00000225032	RP11-228B15.4	antisense	28.5984	-0.940033	0.284802	-3.30066	0.000964591	0.0135426
ENSG00000140718	FTO	protein_coding	375.377	0.36579	0.110845	3.30002	0.000966787	0.0135491
ENSG00000180185	FAHD1	protein_coding	200.278	0.700527	0.212307	3.29959	0.000968264	0.0135491
ENSG00000058799	YIPF1	protein_coding	657.825	0.4496	0.136269	3.29935	0.000969078	0.0135491
ENSG00000124383	MPHOSPH10	protein_coding	490.519	-0.437347	0.132555	-3.29935	0.000969101	0.0135491
ENSG00000155189	AGPAT5	protein_coding	216.05	0.649461	0.196863	3.29906	0.000970107	0.0135491
ENSG00000161204	ABCF3	protein_coding	840.327	-0.533965	0.161872	-3.29869	0.000971355	0.0135491
ENSG00000136527	TRA2B	protein_coding	4573.47	-0.442133	0.13404	-3.29853	0.000971938	0.0135491
ENSG00000165782	TMEM55B	protein_coding	1020.41	-0.621758	0.188519	-3.29811	0.000973366	0.0135491
ENSG00000012779	ALOX5	protein_coding	8262.84	0.374057	0.113431	3.29766	0.000974943	0.0135491
ENSG00000213714	FAM209B	protein_coding	13.0073	-0.801197	0.242968	-3.29754	0.000975354	0.0135491
ENSG00000137413	TAF8	protein_coding	525.638	-0.456873	0.13855	-3.29754	0.000975364	0.0135491
ENSG00000079313	REXO1	protein_coding	931.825	-0.576572	0.174851	-3.29749	0.000975517	0.0135491
ENSG00000095015	MAP3K1	protein_coding	7976.46	-0.601669	0.182507	-3.29669	0.000978309	0.0135758
ENSG00000164935	DCSTAMP	protein_coding	6.57238	-0.925949	0.281066	-3.29442	0.00098626	0.0136739
ENSG00000101544	ADNP2	protein_coding	859.311	-0.753794	0.228845	-3.29391	0.000988038	0.0136863
ENSG00000134910	STT3A	protein_coding	940.491	0.515912	0.156651	3.29338	0.000989917	0.0137002
ENSG00000180921	FAM83H	protein_coding	92.0095	-0.596428	0.181117	-3.29305	0.000991071	0.0137039
ENSG00000225964	AC017076.5	antisense	34.8625	0.997544	0.302985	3.29238	0.000993426	0.0137124
ENSG00000167797	CDK2AP2	protein_coding	724.645	0.628348	0.190849	3.29238	0.000993448	0.0137124
ENSG00000100439	ABHD4	protein_coding	408.798	0.483949	0.147074	3.2905	0.00100008	0.0137917
ENSG00000196459	TRAPPC2	protein_coding	146.123	0.39434	0.119857	3.29011	0.0010015	0.013799
ENSG00000117318	ID3	protein_coding	38.6868	-0.83606	0.254184	-3.28919	0.00100476	0.0138317
ENSG00000122033	MTIF3	protein_coding	448.007	0.488323	0.14848	3.28881	0.00100611	0.013838
ENSG00000172775	FAM192A	protein_coding	1319.19	0.329119	0.100085	3.28839	0.00100761	0.0138464
ENSG00000165240	ATP7A	protein_coding	233.291	0.422839	0.128618	3.28756	0.0010106	0.0138753
ENSG00000170525	PFKFB3	protein_coding	8706.12	-0.912693	0.277659	-3.2871	0.00101225	0.0138856
ENSG00000177352	CCDC71	protein_coding	252.316	0.448708	0.136523	3.28669	0.00101371	0.0138934
ENSG00000146232	NFKBIE	protein_coding	1355.39	-0.651133	0.198135	-3.28631	0.00101511	0.0139003
ENSG00000166233	ARIH1	protein_coding	1299.69	-0.57323	0.174448	-3.28597	0.00101632	0.0139046
ENSG00000162521	RBBP4	protein_coding	2349.52	0.379315	0.115464	3.28514	0.00101933	0.0139335
ENSG00000070214	SLC44A1	protein_coding	1951.94	0.406312	0.1237	3.28465	0.00102111	0.0139389
ENSG00000272520	CTD-2044J15.2	lincRNA	54.3415	0.738276	0.224774	3.28453	0.00102152	0.0139389
ENSG00000007237	GAS7	protein_coding	10093.8	-0.409756	0.124776	-3.28392	0.00102374	0.013952
ENSG00000116918	TSNAX	protein_coding	791.495	0.549445	0.167321	3.28377	0.00102427	0.013952
ENSG00000101246	ARFRP1	protein_coding	375.106	0.395709	0.120562	3.28221	0.00102996	0.0140172
ENSG00000180329	CCDC43	protein_coding	232.373	-0.356732	0.108701	-3.28178	0.00103154	0.0140264
ENSG00000274627	RP11-104N10.2	sense_intronic	72.5062	-0.956222	0.291463	-3.28077	0.00103524	0.0140523
ENSG00000100554	ATP6V1D	protein_coding	717.553	0.576735	0.175793	3.28077	0.00103526	0.0140523
ENSG00000166452	AKIP1	protein_coding	190.354	0.51573	0.15723	3.28009	0.00103774	0.014067
ENSG00000134077	THUMPD3	protein_coding	439.487	-0.557693	0.170029	-3.27998	0.00103814	0.014067
ENSG00000197355	UAP1L1	protein_coding	781.568	-0.830644	0.25328	-3.27955	0.00103971	0.014076
ENSG00000125968	ID1	protein_coding	85.6306	-0.957987	0.292176	-3.2788	0.00104249	0.0140911
ENSG00000170581	STAT2	protein_coding	4725.2	0.705352	0.215128	3.27876	0.00104265	0.0140911
ENSG00000183161	FANCF	protein_coding	87.9273	0.618104	0.188539	3.27838	0.00104405	0.0140979
ENSG00000025156	HSF2	protein_coding	152.769	-0.642788	0.196094	-3.27796	0.00104561	0.0141066
ENSG00000177485	ZBTB33	protein_coding	870.726	-0.471895	0.143973	-3.27765	0.00104674	0.0141096
ENSG00000104872	PIH1D1	protein_coding	855.572	0.363252	0.110836	3.27739	0.00104773	0.0141107
ENSG00000198106	SNX29P2	lincRNA	39.6484	-0.834424	0.254648	-3.27678	0.00105	0.0141235
ENSG00000048028	USP28	protein_coding	318.1	0.464899	0.141885	3.2766	0.00105065	0.0141235
ENSG00000174437	ATP2A2	protein_coding	3677.4	-0.531859	0.16233	-3.2764	0.0010514	0.0141235
ENSG00000077380	DYNC1I2	protein_coding	1718.99	0.632157	0.193017	3.27514	0.00105609	0.0141742
ENSG00000085832	EPS15	protein_coding	2182.7	0.465907	0.142305	3.27401	0.00106034	0.0142123
ENSG00000256683	ZNF350	protein_coding	364.887	-0.468128	0.142988	-3.2739	0.00106076	0.0142123
ENSG00000225828	FAM229A	protein_coding	70.2027	-0.732341	0.223718	-3.2735	0.00106223	0.0142198
ENSG00000100889	PCK2	protein_coding	762.37	0.575325	0.175785	3.27289	0.00106453	0.0142383
ENSG00000100365	NCF4	protein_coding	2547.57	0.392096	0.119826	3.27221	0.0010671	0.014253
ENSG00000106608	URGCP	protein_coding	236.869	-0.611183	0.186785	-3.27212	0.00106746	0.014253
ENSG00000182372	CLN8	protein_coding	373.363	-0.60613	0.185273	-3.27155	0.00106959	0.0142691
ENSG00000144674	GOLGA4	protein_coding	1171.55	-0.544961	0.16659	-3.27127	0.00107065	0.014271
ENSG00000115598	IL1RL2	protein_coding	15.6575	-0.992196	0.303345	-3.27084	0.00107227	0.0142804
ENSG00000175793	SFN	protein_coding	5.7414	-0.967529	0.295928	-3.26947	0.00107749	0.0143376
ENSG00000119718	EIF2B2	protein_coding	223.583	0.50825	0.155466	3.26921	0.00107849	0.0143387
ENSG00000166025	AMOTL1	protein_coding	64.3612	-0.687723	0.210398	-3.26868	0.00108051	0.0143533
ENSG00000133106	EPSTI1	protein_coding	2066.21	0.935752	0.286343	3.26794	0.00108335	0.0143787
ENSG00000157379	DHRS1	protein_coding	437.437	0.37924	0.116105	3.26634	0.00108948	0.0144478
ENSG00000150712	MTMR12	protein_coding	883.341	0.30065	0.0920764	3.26523	0.00109376	0.0144921
ENSG00000120925	RNF170	protein_coding	255.609	0.523063	0.16021	3.26487	0.00109514	0.0144981
ENSG00000048405	ZNF800	protein_coding	1133.9	-0.637222	0.195209	-3.2643	0.00109736	0.014515
ENSG00000137207	YIPF3	protein_coding	1636.81	0.406212	0.124452	3.26401	0.00109849	0.0145176
ENSG00000136816	TOR1B	protein_coding	931.429	0.677251	0.207528	3.26342	0.00110078	0.0145355
ENSG00000197114	ZGPAT	protein_coding	188.402	-0.55769	0.17094	-3.26249	0.00110436	0.0145705
ENSG00000130713	EXOSC2	protein_coding	294.184	-0.355147	0.10887	-3.26211	0.00110585	0.0145778
ENSG00000134001	EIF2S1	protein_coding	724.547	0.469928	0.144074	3.26173	0.00110736	0.0145809
ENSG00000163832	ELP6	protein_coding	170.749	0.425048	0.130329	3.26134	0.00110887	0.0145809
ENSG00000198538	ZNF28	protein_coding	51.4645	0.786888	0.241292	3.26114	0.00110964	0.0145809
ENSG00000261884	CTC-479C5.12	protein_coding	138.922	-0.83042	0.254645	-3.26109	0.00110985	0.0145809
ENSG00000177854	TMEM187	protein_coding	69.8182	0.585496	0.179564	3.26065	0.00111155	0.014591
ENSG00000277232	GTSE1-AS1	lincRNA	4.91011	0.940922	0.288588	3.26044	0.0011124	NA
ENSG00000079246	XRCC5	protein_coding	6446.05	0.491025	0.150643	3.25952	0.00111602	0.0146217
ENSG00000179941	BBS10	protein_coding	74.5154	0.740115	0.227063	3.25951	0.00111605	0.0146217
ENSG00000164077	MON1A	protein_coding	95.0315	0.639898	0.196327	3.25934	0.00111671	0.0146217
ENSG00000119900	OGFRL1	protein_coding	10227.5	0.417331	0.128078	3.2584	0.00112041	0.0146366
ENSG00000196428	TSC22D2	protein_coding	1202.72	-0.599128	0.183887	-3.25813	0.0011215	0.0146366
ENSG00000273951	RP4-620E11.8	sense_intronic	21.174	-0.804471	0.246913	-3.25812	0.00112152	0.0146366
ENSG00000143156	NME7	protein_coding	44.4104	0.632168	0.194042	3.25789	0.00112242	0.0146366
ENSG00000139323	POC1B	protein_coding	527.592	0.39512	0.121296	3.25748	0.00112406	0.0146366
ENSG00000084112	SSH1	protein_coding	2053.8	-0.423977	0.130155	-3.25747	0.00112411	0.0146366
ENSG00000111011	RSRC2	protein_coding	1740.95	-0.712257	0.218682	-3.25704	0.00112579	0.0146366
ENSG00000204514	ZNF814	protein_coding	92.5537	-0.677992	0.20817	-3.25692	0.0011263	0.0146366
ENSG00000108021	FAM208B	protein_coding	814.371	-0.574451	0.176379	-3.25691	0.00112633	0.0146366
ENSG00000149929	HIRIP3	protein_coding	91.8047	0.636529	0.195497	3.25595	0.00113012	0.0146664
ENSG00000138834	MAPK8IP3	protein_coding	2812.03	-0.700093	0.215026	-3.25586	0.00113051	0.0146664
ENSG00000126709	IFI6	protein_coding	3288.04	0.982155	0.301706	3.25533	0.00113259	0.0146812
ENSG00000124496	TRERF1	protein_coding	1010.37	-0.38898	0.119534	-3.25414	0.00113738	0.0147187
ENSG00000109047	RCVRN	protein_coding	29.1918	-0.781175	0.240056	-3.25413	0.00113738	0.0147188
ENSG00000100314	CABP7	protein_coding	5.04268	-0.97354	0.299204	-3.25376	0.00113887	NA
ENSG00000275074	NUDT18	protein_coding	230.553	0.649378	0.199599	3.25341	0.00114031	0.0147443
ENSG00000017260	ATP2C1	protein_coding	1157.77	0.242477	0.0745578	3.2522	0.00114516	0.0147947
ENSG00000089012	SIRPG	protein_coding	4.7666	0.981106	0.301697	3.25196	0.00114614	NA
ENSG00000183496	MEX3B	protein_coding	57.3061	-0.771799	0.237397	-3.25109	0.00114962	0.01484
ENSG00000249437	NAIP	protein_coding	2682.54	0.523448	0.161028	3.25066	0.00115138	0.0148504
ENSG00000008513	ST3GAL1	protein_coding	2467.24	-0.325673	0.100198	-3.25028	0.0011529	0.0148577
ENSG00000270120	RP11-327F22.6	sense_intronic	44.0422	-0.860814	0.265029	-3.24799	0.00116221	0.0149653
ENSG00000055483	USP36	protein_coding	895.886	-0.840483	0.258849	-3.247	0.00116627	0.0150051
ENSG00000147316	MCPH1	protein_coding	426.818	-0.351589	0.108313	-3.24606	0.00117013	0.0150423
ENSG00000275807	RP11-1348G14.8	antisense	15.4168	-0.90633	0.279329	-3.24467	0.00117587	0.0151036
ENSG00000129460	NGDN	protein_coding	549.545	-0.491125	0.15139	-3.24411	0.00117818	0.0151207
ENSG00000277423	RP11-173P15.9	lincRNA	6.17303	-0.947327	0.292083	-3.24335	0.00118133	0.0151486
ENSG00000146757	ZNF92	protein_coding	368.945	-0.548371	0.169126	-3.24239	0.00118534	0.0151876
ENSG00000258439	RP11-173A8.2	processed_pseudogene	5.14968	-0.90841	0.280176	-3.24229	0.00118574	NA
ENSG00000105655	ISYNA1	protein_coding	38.8757	-0.934425	0.288234	-3.2419	0.00118737	0.015201
ENSG00000136108	CKAP2	protein_coding	512.979	-0.464487	0.143336	-3.24054	0.00119304	0.015241
ENSG00000032219	ARID4A	protein_coding	1108.73	-0.531967	0.164161	-3.24053	0.00119307	0.015241
ENSG00000162852	CNST	protein_coding	471.271	-0.281793	0.0869612	-3.24045	0.00119343	0.015241
ENSG00000136518	ACTL6A	protein_coding	272.767	0.554632	0.171216	3.23937	0.00119796	0.0152862
ENSG00000169764	UGP2	protein_coding	1485.86	0.550502	0.169977	3.23868	0.00120086	0.015308
ENSG00000117593	DARS2	protein_coding	170.557	0.587619	0.181448	3.23849	0.00120163	0.015308
ENSG00000213079	SCAF8	protein_coding	1154.23	-0.491191	0.151687	-3.2382	0.00120288	0.0153113
ENSG00000119231	SENP5	protein_coding	559.796	-0.499108	0.154225	-3.23624	0.00121116	0.0154041
ENSG00000064703	DDX20	protein_coding	283.045	-0.57154	0.176626	-3.23588	0.00121266	0.0154048
ENSG00000163319	MRPS18C	protein_coding	105.063	0.519008	0.160407	3.23556	0.00121404	0.0154048
ENSG00000168061	SAC3D1	protein_coding	95.0705	0.803996	0.248512	3.23524	0.00121542	0.0154048
ENSG00000186106	ANKRD46	protein_coding	78.492	0.542165	0.167584	3.23518	0.00121567	0.0154048
ENSG00000187609	EXD3	protein_coding	97.2412	-0.571377	0.17662	-3.23506	0.00121617	0.0154048
ENSG00000100387	RBX1	protein_coding	1114.49	0.486212	0.150314	3.23465	0.00121792	0.0154077
ENSG00000189420	ZFP92	protein_coding	17.01	-0.854428	0.264157	-3.23454	0.00121838	0.0154077
ENSG00000140044	JDP2	protein_coding	2329.72	-0.722549	0.223416	-3.23409	0.00122032	0.0154152
ENSG00000076242	MLH1	protein_coding	586.518	0.372809	0.11528	3.23394	0.00122095	0.0154152
ENSG00000153140	CETN3	protein_coding	70.7891	0.755391	0.233603	3.23366	0.00122216	0.0154179
ENSG00000144535	DIS3L2	protein_coding	392.262	-0.280425	0.0867924	-3.23099	0.00123364	0.0155501
ENSG00000165494	PCF11	protein_coding	2248.24	-0.515518	0.159625	-3.22957	0.00123978	0.0156148
ENSG00000171115	GIMAP8	protein_coding	1111.16	0.841168	0.260517	3.22884	0.00124295	0.0156421
ENSG00000279863	RP11-521C22.2	TEC	33.8604	-0.87742	0.271786	-3.22835	0.00124508	0.0156562
ENSG00000226210	WASH7P	unprocessed_pseudogene	342.189	-0.754852	0.233856	-3.22785	0.00124722	0.0156704
ENSG00000117523	PRRC2C	protein_coding	4602.22	-0.525162	0.162711	-3.22757	0.00124846	0.0156733
ENSG00000132952	USPL1	protein_coding	591.481	-0.641456	0.198768	-3.22716	0.00125026	0.0156832
ENSG00000131943	C19orf12	protein_coding	217.028	0.333206	0.103286	3.22605	0.0012551	0.0157278
ENSG00000130985	UBA1	protein_coding	5701.75	0.422961	0.131115	3.22589	0.00125584	0.0157278
ENSG00000249138	SLED1	transcribed_processed_pseudogene	31.0182	-0.929423	0.28824	-3.22448	0.00126201	0.0157924
ENSG00000114988	LMAN2L	protein_coding	183.874	0.727637	0.225693	3.22401	0.00126409	0.0157991
ENSG00000152484	USP12	protein_coding	1433.95	-0.523209	0.162295	-3.22381	0.00126496	0.0157991
ENSG00000145916	RMND5B	protein_coding	556.694	0.3239	0.100476	3.22367	0.0012656	0.0157991
ENSG00000207588	MIR593	miRNA	1.30248	-0.934925	0.290052	-3.2233	0.00126722	NA
ENSG00000172086	KRCC1	protein_coding	480.524	0.707939	0.219641	3.22317	0.00126782	0.0158141
ENSG00000218510	LINC00339	lincRNA	209.426	0.621981	0.192991	3.22286	0.00126919	0.0158185
ENSG00000143106	PSMA5	protein_coding	1618.95	0.435903	0.135272	3.22242	0.00127112	0.0158299
ENSG00000266320	MIR3909	miRNA	7.04687	-0.97523	0.302898	-3.21966	0.00128343	0.0159692
ENSG00000126860	EVI2A	protein_coding	3166.9	0.586021	0.182037	3.21924	0.0012853	0.0159692
ENSG00000277072	STAG3L2	transcribed_unprocessed_pseudogene	59.7586	-0.617502	0.191817	-3.21922	0.00128539	0.0159692
ENSG00000166886	NAB2	protein_coding	943.199	-0.969363	0.301162	-3.21875	0.00128752	0.0159795
ENSG00000104859	CLASRP	protein_coding	1534.85	-0.617624	0.191893	-3.21858	0.00128827	0.0159795
ENSG00000280111	CTA-292E10.9	antisense	102.723	-0.725552	0.225502	-3.2175	0.00129314	0.0160185
ENSG00000171105	INSR	protein_coding	936.99	-0.364943	0.113427	-3.21742	0.00129348	0.0160185
ENSG00000274475	Metazoa_SRP	misc_RNA	10.2411	-0.890602	0.276832	-3.21712	0.00129483	0.0160224
ENSG00000215421	ZNF407	protein_coding	440.212	-0.425215	0.132205	-3.21633	0.00129842	0.016048
ENSG00000115170	ACVR1	protein_coding	439.094	0.351296	0.109227	3.21621	0.00129895	0.016048
ENSG00000148841	ITPRIP	protein_coding	5026.54	-0.732667	0.227918	-3.21461	0.0013062	0.0161247
ENSG00000198160	MIER1	protein_coding	1814.76	-0.553825	0.172328	-3.21379	0.00130996	0.0161582
ENSG00000160602	NEK8	protein_coding	110.751	0.446935	0.139084	3.21341	0.00131169	0.0161667
ENSG00000082898	XPO1	protein_coding	2418.08	0.437842	0.136274	3.21295	0.00131381	0.0161722
ENSG00000168062	BATF2	protein_coding	70.2814	0.944056	0.293837	3.21286	0.00131422	0.0161722
ENSG00000151414	NEK7	protein_coding	1633.65	0.610454	0.190076	3.21163	0.00131986	0.0162288
ENSG00000171316	CHD7	protein_coding	168.762	-0.709438	0.220914	-3.21138	0.001321	0.016229
ENSG00000239857	GET4	protein_coding	31.7823	-0.632356	0.196924	-3.21117	0.00132196	0.016229
ENSG00000187608	ISG15	protein_coding	1507.65	0.971218	0.30252	3.21042	0.00132539	0.0162583
ENSG00000279776	RP1-86D1.3	TEC	2.06239	-0.963881	0.300269	-3.21006	0.00132707	NA
ENSG00000197601	FAR1	protein_coding	2596.22	0.410321	0.127824	3.21005	0.00132712	0.0162585
ENSG00000155111	CDK19	protein_coding	1266.36	0.278164	0.0866564	3.20997	0.00132751	0.0162585
ENSG00000246560	RP11-10L12.4	antisense	5.97332	0.900187	0.280506	3.20916	0.00133124	0.0162914
ENSG00000143226	FCGR2A	protein_coding	7534.27	0.516421	0.160954	3.20849	0.00133432	0.0163155
ENSG00000124193	SRSF6	protein_coding	5322.54	-0.517556	0.161319	-3.20828	0.0013353	0.0163155
ENSG00000242110	AMACR	protein_coding	3.77679	0.939802	0.292995	3.20757	0.00133863	NA
ENSG00000136783	NIPSNAP3A	protein_coding	1157.93	0.423838	0.132144	3.2074	0.00133942	0.0163409
ENSG00000138303	ASCC1	protein_coding	268.239	0.49743	0.155089	3.20738	0.00133948	0.0163409
ENSG00000175137	SH3BP5L	protein_coding	614.559	0.385221	0.120139	3.20646	0.00134379	0.0163806
ENSG00000147383	NSDHL	protein_coding	225.021	0.426325	0.132987	3.20577	0.001347	0.0164068
ENSG00000166266	CUL5	protein_coding	862.478	-0.415689	0.129707	-3.20484	0.00135137	0.0164471
ENSG00000133114	GPALPP1	protein_coding	285.562	0.358365	0.111872	3.20334	0.00135846	0.0165204
ENSG00000157077	ZFYVE9	protein_coding	6.85905	-0.952957	0.29751	-3.2031	0.00135955	0.0165209
ENSG00000138623	SEMA7A	protein_coding	82.7028	-0.81725	0.255212	-3.20224	0.00136364	0.0165575
ENSG00000170266	GLB1	protein_coding	3237.4	0.431824	0.134869	3.2018	0.00136572	0.0165654
ENSG00000196547	MAN2A2	protein_coding	2447.4	-0.610448	0.190667	-3.20165	0.00136642	0.0165654
ENSG00000152683	SLC30A6	protein_coding	327.867	0.45423	0.141905	3.20093	0.00136984	0.016594
ENSG00000173614	NMNAT1	protein_coding	161.111	0.548168	0.171277	3.20048	0.00137198	0.0165948
ENSG00000118894	FAM86A	protein_coding	47.0605	0.637641	0.199234	3.20047	0.00137205	0.0165948
ENSG00000170677	SOCS6	protein_coding	584.83	-0.775558	0.242348	-3.20018	0.0013734	0.0165977
ENSG00000119471	HSDL2	protein_coding	619.589	0.559126	0.174738	3.1998	0.00137522	0.0165977
ENSG00000075303	SLC25A40	protein_coding	841.772	0.529006	0.165328	3.19975	0.00137549	0.0165977
ENSG00000167987	VPS37C	protein_coding	693.16	-0.530104	0.165708	-3.19903	0.00137893	0.0166263
ENSG00000135341	MAP3K7	protein_coding	833.964	0.371894	0.116275	3.1984	0.00138195	0.0166498
ENSG00000162614	NEXN	protein_coding	184.7	0.917395	0.286985	3.19666	0.00139027	0.016737
ENSG00000205534	SMG1P2	unprocessed_pseudogene	50.9429	-0.771257	0.241351	-3.19558	0.0013955	0.0167818
ENSG00000167110	GOLGA2	protein_coding	790.685	0.249186	0.0779816	3.19545	0.00139614	0.0167818
ENSG00000169599	NFU1	protein_coding	262.479	0.463408	0.145042	3.195	0.0013983	0.0167947
ENSG00000108963	DPH1	protein_coding	213.258	-0.579626	0.181478	-3.19391	0.00140358	0.0168451
ENSG00000135093	USP30	protein_coding	243.989	-0.451428	0.141354	-3.19359	0.00140516	0.0168511
ENSG00000180964	TCEAL8	protein_coding	332.222	0.407165	0.127535	3.19257	0.00141015	0.0168979
ENSG00000143183	TMCO1	protein_coding	1291.73	0.490618	0.153708	3.19188	0.00141351	0.0169223
ENSG00000103313	MEFV	protein_coding	3162.42	0.520854	0.16319	3.1917	0.00141436	0.0169223
ENSG00000023892	DEF6	protein_coding	2084.17	0.333846	0.104616	3.19115	0.00141709	0.0169419
ENSG00000138613	APH1B	protein_coding	473.111	0.374372	0.117334	3.19065	0.00141952	0.0169579
ENSG00000112118	MCM3	protein_coding	399.202	0.607378	0.19039	3.19018	0.00142182	0.0169723
ENSG00000169018	FEM1B	protein_coding	2156.26	-0.359604	0.112742	-3.18961	0.00142466	0.0169931
ENSG00000101654	RNMT	protein_coding	787.272	-0.581112	0.182212	-3.18921	0.00142661	0.0170034
ENSG00000091947	TMEM101	protein_coding	484.227	0.525886	0.164908	3.18896	0.00142784	0.017005
ENSG00000151500	THYN1	protein_coding	333.748	0.502625	0.157642	3.1884	0.00143063	0.0170251
ENSG00000260669	AL136419.6	processed_transcript	15.215	-0.690968	0.216735	-3.18807	0.00143226	0.0170315
ENSG00000124103	FAM209A	protein_coding	13.0913	-0.849239	0.266481	-3.18686	0.00143825	0.0170897
ENSG00000134294	SLC38A2	protein_coding	4402.1	-0.591829	0.18578	-3.18565	0.00144431	0.0171441
ENSG00000169223	LMAN2	protein_coding	2621.57	0.455271	0.14292	3.1855	0.00144503	0.0171441
ENSG00000182952	HMGN4	protein_coding	1478.94	0.391001	0.122765	3.18495	0.00144779	0.0171636
ENSG00000099381	SETD1A	protein_coding	1153.43	-0.580976	0.182471	-3.18394	0.00145283	0.0172103
ENSG00000134996	OSTF1	protein_coding	3035.32	0.472199	0.148333	3.18337	0.00145569	0.017231
ENSG00000269982	RP11-1020A11.2	antisense	48.69	-0.712145	0.223777	-3.18238	0.00146068	0.0172769
ENSG00000026751	SLAMF7	protein_coding	671.689	0.883393	0.277663	3.18153	0.00146501	0.0173026
ENSG00000106211	HSPB1	protein_coding	183.482	0.691198	0.217254	3.18151	0.00146507	0.0173026
ENSG00000135686	KLHL36	protein_coding	941.304	-0.390521	0.122776	-3.18076	0.0014689	0.0173321
ENSG00000113649	TCERG1	protein_coding	1003.97	-0.58107	0.182693	-3.18058	0.00146981	0.0173321
ENSG00000269901	RP11-178L8.9	antisense	1.51237	-0.923533	0.29044	-3.17977	0.0014739	NA
ENSG00000066322	ELOVL1	protein_coding	1615.29	0.367049	0.115443	3.17947	0.00147543	0.017379
ENSG00000079785	DDX1	protein_coding	751.5	0.370347	0.116485	3.17936	0.00147602	0.017379
ENSG00000125449	ARMC7	protein_coding	211.13	0.551468	0.173476	3.17893	0.00147819	0.0173914
ENSG00000113384	GOLPH3	protein_coding	2260.76	0.319603	0.100549	3.17858	0.00148	0.0173995
ENSG00000177646	ACAD9	protein_coding	415.305	0.393076	0.123676	3.17826	0.00148164	0.0174056
ENSG00000143862	ARL8A	protein_coding	1706.17	-0.511206	0.160877	-3.17762	0.00148491	0.0174309
ENSG00000118900	UBN1	protein_coding	1820.1	-0.441153	0.138853	-3.17713	0.00148743	0.0174472
ENSG00000185947	ZNF267	protein_coding	1567.87	-0.721541	0.227285	-3.17461	0.00150039	0.0175649
ENSG00000005175	RPAP3	protein_coding	661.988	0.626186	0.197252	3.17456	0.00150066	0.0175649
ENSG00000110042	DTX4	protein_coding	347.913	-0.651504	0.205238	-3.17438	0.00150156	0.0175649
ENSG00000101413	RPRD1B	protein_coding	447.838	-0.573117	0.180549	-3.1743	0.00150198	0.0175649
ENSG00000100629	CEP128	protein_coding	51.8528	-0.52498	0.165397	-3.17406	0.0015032	0.017566
ENSG00000140575	IQGAP1	protein_coding	20484.4	0.444491	0.140117	3.17229	0.00151243	0.0176539
ENSG00000123908	37469	protein_coding	483.945	-0.511767	0.16133	-3.17218	0.00151299	0.0176539
ENSG00000246898	LINC00920	lincRNA	20.0457	0.882653	0.27829	3.17171	0.00151545	0.017661
ENSG00000269066	CTD-2528A14.5	antisense	6.59486	-0.96086	0.302978	-3.17138	0.00151716	0.017661
ENSG00000144848	ATG3	protein_coding	2674.04	0.423561	0.133565	3.17119	0.00151816	0.017661
ENSG00000164512	ANKRD55	protein_coding	10.1625	0.753388	0.237582	3.17106	0.00151883	0.017661
ENSG00000057608	GDI2	protein_coding	8636.55	0.558449	0.176113	3.17097	0.00151929	0.017661
ENSG00000116957	TBCE	protein_coding	309.178	0.499186	0.157465	3.17013	0.00152369	0.0176989
ENSG00000138375	SMARCAL1	protein_coding	345.674	0.477888	0.150802	3.16897	0.0015298	0.0177434
ENSG00000123360	PDE1B	protein_coding	230.173	-0.767125	0.242074	-3.16897	0.0015298	0.0177434
ENSG00000171311	EXOSC1	protein_coding	477.446	0.40614	0.128175	3.16865	0.00153151	0.01775
ENSG00000138629	UBL7	protein_coding	908.784	0.452957	0.142963	3.16835	0.00153307	0.0177548
ENSG00000227741	RP11-536C5.7	antisense	16.2224	-0.864931	0.273051	-3.16765	0.00153674	0.0177687
ENSG00000082146	STRADB	protein_coding	370.532	0.354937	0.112054	3.16756	0.00153725	0.0177687
ENSG00000104412	EMC2	protein_coding	228.692	0.475543	0.150139	3.16736	0.00153829	0.0177687
ENSG00000270049	RP11-297D21.4	antisense	24.6225	0.586588	0.185204	3.16726	0.00153884	0.0177687
ENSG00000163554	SPTA1	protein_coding	6.42897	0.892029	0.281738	3.16616	0.00154466	0.0178227
ENSG00000100246	DNAL4	protein_coding	140.893	0.482799	0.152504	3.16582	0.00154647	0.0178295
ENSG00000115484	CCT4	protein_coding	1389.42	0.327886	0.103577	3.16562	0.00154755	0.0178295
ENSG00000160087	UBE2J2	protein_coding	1048.08	0.367125	0.115998	3.16492	0.00155126	0.017859
ENSG00000118503	TNFAIP3	protein_coding	6596.21	-0.799145	0.25262	-3.16342	0.00155926	0.0179253
ENSG00000140553	UNC45A	protein_coding	781.693	0.47727	0.150872	3.16341	0.00155932	0.0179253
ENSG00000102760	RGCC	protein_coding	1706.94	-0.955287	0.302134	-3.16181	0.00156794	0.0180036
ENSG00000178977	LINC00324	lincRNA	168.061	0.599169	0.189508	3.16171	0.00156845	0.0180036
ENSG00000117697	NSL1	protein_coding	671.977	0.490651	0.155212	3.16117	0.00157136	0.0180202
ENSG00000006118	TMEM132A	protein_coding	31.2273	-0.920088	0.291074	-3.16101	0.00157222	0.0180202
ENSG00000174928	C3orf33	protein_coding	18.7848	-0.743	0.23509	-3.16049	0.00157504	0.0180392
ENSG00000113732	ATP6V0E1	protein_coding	4458.97	0.52177	0.165115	3.16003	0.0015775	0.018052
ENSG00000015285	WAS	protein_coding	5152.8	0.439206	0.139002	3.1597	0.0015793	0.018052
ENSG00000100644	HIF1A	protein_coding	8544.61	-0.886926	0.280714	-3.15953	0.00158023	0.018052
ENSG00000142694	EVA1B	protein_coding	120.152	0.651597	0.206239	3.15943	0.0015808	0.018052
ENSG00000124733	MEA1	protein_coding	491.983	0.448792	0.142063	3.1591	0.00158259	0.0180591
ENSG00000131398	KCNC3	protein_coding	453.657	-0.549776	0.174078	-3.15821	0.00158743	0.0180946
ENSG00000101916	TLR8	protein_coding	4668.85	0.649882	0.205783	3.1581	0.00158802	0.0180946
ENSG00000153029	MR1	protein_coding	1520.13	0.352484	0.111631	3.15757	0.0015909	0.018101
ENSG00000211899	IGHM	IG_C_gene	273.641	0.958538	0.303584	3.15741	0.00159177	0.018101
ENSG00000110619	CARS	protein_coding	814.436	0.351785	0.111418	3.15735	0.00159208	0.018101
ENSG00000261267	RP11-44I10.3	antisense	44.7424	-0.698611	0.221293	-3.15694	0.00159433	0.0181133
ENSG00000075426	FOSL2	protein_coding	16213.2	-0.754205	0.23896	-3.1562	0.00159842	0.0181442
ENSG00000089916	GPATCH2L	protein_coding	1477.83	-0.594361	0.188326	-3.15602	0.00159938	0.0181442
ENSG00000171456	ASXL1	protein_coding	1168.77	-0.383757	0.121616	-3.15547	0.00160241	0.0181634
ENSG00000196296	ATP2A1	protein_coding	9.56622	-0.903136	0.28623	-3.15528	0.00160345	0.0181634
ENSG00000148925	BTBD10	protein_coding	311.517	0.480595	0.152324	3.15507	0.00160458	0.0181634
ENSG00000180667	YOD1	protein_coding	637.326	-0.764203	0.242264	-3.15442	0.00160817	0.0181908
ENSG00000219881	GAPDHP42	processed_pseudogene	11.2879	-0.922989	0.292669	-3.15369	0.00161218	0.0182229
ENSG00000090273	NUDC	protein_coding	888.091	0.386622	0.122619	3.15302	0.00161588	0.0182305
ENSG00000080845	DLGAP4	protein_coding	746.163	0.380381	0.120644	3.15293	0.00161642	0.0182305
ENSG00000198924	DCLRE1A	protein_coding	58.7819	0.488526	0.15495	3.15281	0.00161709	0.0182305
ENSG00000225492	GBP1P1	transcribed_unprocessed_pseudogene	39.3461	0.956188	0.303289	3.15272	0.00161755	0.0182305
ENSG00000163734	CXCL3	protein_coding	415.142	-0.940059	0.298211	-3.15233	0.00161972	0.0182418
ENSG00000183696	UPP1	protein_coding	2785.65	-0.671604	0.213089	-3.15175	0.00162294	0.0182648
ENSG00000157540	DYRK1A	protein_coding	2567.05	-0.44485	0.141176	-3.15104	0.00162692	0.0182911
ENSG00000041802	LSG1	protein_coding	557.23	-0.562794	0.178621	-3.15077	0.00162839	0.0182911
ENSG00000124251	TP53TG5	protein_coding	13.7202	-0.888119	0.281888	-3.15061	0.0016293	0.0182911
ENSG00000111077	TENC1	protein_coding	10.1421	-0.922193	0.292714	-3.15049	0.00162998	0.0182911
ENSG00000110876	SELPLG	protein_coding	7881.46	0.580686	0.184369	3.14959	0.00163501	0.0183343
ENSG00000100591	AHSA1	protein_coding	895.574	0.574654	0.182563	3.14771	0.00164557	0.0184362
ENSG00000196678	ERI2	protein_coding	85.4421	0.70744	0.224759	3.14755	0.00164647	0.0184362
ENSG00000174327	SLC16A13	protein_coding	39.794	0.761926	0.242097	3.1472	0.00164843	0.0184448
ENSG00000112303	VNN2	protein_coding	6609.42	0.685627	0.217919	3.14625	0.00165378	0.0184793
ENSG00000185728	YTHDF3	protein_coding	2965.92	-0.594335	0.188904	-3.14623	0.00165389	0.0184793
ENSG00000246067	RAB30-AS1	lincRNA	41.6332	0.581126	0.184718	3.14601	0.00165513	0.0184799
ENSG00000148288	GBGT1	protein_coding	620.952	0.524519	0.16675	3.14554	0.00165782	0.0184967
ENSG00000102081	FMR1	protein_coding	1050.26	0.358706	0.114049	3.14519	0.00165977	0.0185051
ENSG00000164530	PI16	protein_coding	2.23278	0.942179	0.299599	3.1448	0.00166203	NA
ENSG00000075568	TMEM131	protein_coding	1987.89	0.268592	0.0854101	3.14474	0.00166237	0.0185208
ENSG00000124788	ATXN1	protein_coding	1461.27	-0.430353	0.136873	-3.14419	0.0016655	0.0185424
ENSG00000151445	VIPAS39	protein_coding	390.912	0.524955	0.167007	3.14332	0.00167042	0.0185776
ENSG00000181523	SGSH	protein_coding	1759	-0.4867	0.154852	-3.143	0.00167226	0.0185776
ENSG00000259065	RP5-1021I20.1	antisense	14.2829	-0.945513	0.300866	-3.14264	0.00167434	0.0185776
ENSG00000166169	POLL	protein_coding	397.328	0.382343	0.121666	3.14257	0.00167473	0.0185776
ENSG00000127951	FGL2	protein_coding	42186.7	0.613732	0.195302	3.14248	0.00167525	0.0185776
ENSG00000125971	DYNLRB1	protein_coding	890.202	0.44264	0.140862	3.14237	0.00167583	0.0185776
ENSG00000102981	PARD6A	protein_coding	53.1219	0.55042	0.175193	3.14179	0.00167918	0.0186014
ENSG00000169105	CHST14	protein_coding	253.411	0.549471	0.17497	3.14037	0.00168738	0.0186699
ENSG00000198369	SPRED2	protein_coding	150.119	-0.907057	0.288861	-3.14012	0.0016888	0.0186699
ENSG00000114316	USP4	protein_coding	2701.61	0.198012	0.0630593	3.14009	0.00168896	0.0186698
ENSG00000144118	RALB	protein_coding	3653.48	0.428897	0.136604	3.1397	0.0016912	0.0186813
ENSG00000082805	ERC1	protein_coding	947.085	-0.419754	0.133713	-3.13921	0.00169405	0.0186918
ENSG00000151332	MBIP	protein_coding	226.857	-0.388509	0.123763	-3.13912	0.00169455	0.0186918
ENSG00000142546	NOSIP	protein_coding	646.586	0.503797	0.160531	3.13831	0.00169927	0.018717
ENSG00000162813	BPNT1	protein_coding	251.435	0.655432	0.208849	3.1383	0.00169928	0.018717
ENSG00000163435	ELF3	protein_coding	49.02	-0.883563	0.28156	-3.1381	0.00170045	0.018717
ENSG00000038945	MSR1	protein_coding	634.059	0.91915	0.292961	3.13745	0.00170426	0.0187326
ENSG00000275022	MIR6753	miRNA	9.6879	-0.915787	0.291904	-3.13729	0.00170518	0.0187326
ENSG00000183726	TMEM50A	protein_coding	3945.49	0.411349	0.131118	3.13724	0.00170549	0.0187326
ENSG00000261652	C15orf65	protein_coding	5.01179	0.901718	0.287435	3.13712	0.00170619	NA
ENSG00000126524	SBDS	protein_coding	1322.95	-0.628808	0.200479	-3.13653	0.0017096	0.0187646
ENSG00000133808	MICALCL	protein_coding	272.512	-0.647119	0.206387	-3.13547	0.00171578	0.0188191
ENSG00000081320	STK17B	protein_coding	23216.8	-0.479363	0.152897	-3.1352	0.00171735	0.0188231
ENSG00000169139	UBE2V2	protein_coding	710.357	0.4634	0.147825	3.13479	0.0017198	0.0188365
ENSG00000233668	RP11-571F15.3	processed_pseudogene	10.7696	-0.950157	0.303198	-3.13378	0.00172571	0.018888
ENSG00000168395	ING5	protein_coding	280.645	-0.600566	0.191698	-3.13288	0.00173101	0.0189327
ENSG00000276744	CTD-2562G15.3	sense_intronic	1.57823	0.938998	0.299752	3.13258	0.00173276	NA
ENSG00000162650	ATXN7L2	protein_coding	139.822	-0.633238	0.202147	-3.13256	0.00173288	0.0189398
ENSG00000115364	MRPL19	protein_coding	356.04	0.488123	0.155876	3.13149	0.00173923	0.0189816
ENSG00000198746	GPATCH3	protein_coding	343.651	-0.438771	0.140124	-3.13131	0.00174027	0.0189816
ENSG00000176915	ANKLE2	protein_coding	1693.59	-0.460128	0.146945	-3.1313	0.00174037	0.0189816
ENSG00000143851	PTPN7	protein_coding	396.407	-0.934764	0.298575	-3.13075	0.00174359	0.0189912
ENSG00000108179	PPIF	protein_coding	4986.62	-0.908642	0.290248	-3.13057	0.00174467	0.0189912
ENSG00000107341	UBE2R2	protein_coding	3530.81	0.371612	0.118706	3.13053	0.00174491	0.0189912
ENSG00000145780	FEM1C	protein_coding	1359.05	-0.776006	0.247901	-3.13031	0.00174622	0.0189922
ENSG00000105321	CCDC9	protein_coding	672.094	-0.74056	0.236601	-3.13	0.00174809	0.0189991
ENSG00000280037	RP11-434P11.1	TEC	1.89626	-0.938632	0.299886	-3.12996	0.0017483	NA
ENSG00000143373	ZNF687	protein_coding	1167.16	-0.517822	0.165505	-3.12873	0.00175563	0.0190654
ENSG00000095383	TBC1D2	protein_coding	1247.12	0.418324	0.133711	3.12856	0.00175664	0.0190654
ENSG00000102225	CDK16	protein_coding	884.119	-0.668012	0.213547	-3.12817	0.00175898	0.0190662
ENSG00000107758	PPP3CB	protein_coding	1455.78	0.37093	0.118587	3.12792	0.00176045	0.0190662
ENSG00000197771	MCMBP	protein_coding	2281.05	0.566696	0.181179	3.12782	0.00176107	0.0190662
ENSG00000168140	VASN	protein_coding	20.7289	-0.835959	0.267273	-3.12773	0.00176162	0.0190662
ENSG00000272836	RP3-402G11.27	antisense	19.8335	-0.896833	0.286811	-3.12692	0.0017665	0.0191057
ENSG00000128000	ZNF780B	protein_coding	71.8948	0.722459	0.231125	3.12583	0.00177301	0.0191628
ENSG00000139737	SLAIN1	protein_coding	38.9215	0.589648	0.188691	3.12494	0.00177843	0.019208
ENSG00000197694	SPTAN1	protein_coding	1562.06	0.329367	0.105425	3.12418	0.001783	0.0192441
ENSG00000113240	CLK4	protein_coding	481.619	-0.732441	0.234479	-3.12369	0.00178597	0.0192627
ENSG00000176624	MEX3C	protein_coding	1609.68	-0.666791	0.213543	-3.12251	0.00179313	0.0192955
ENSG00000164663	USP49	protein_coding	202.655	-0.694623	0.222458	-3.1225	0.00179324	0.0192955
ENSG00000170876	TMEM43	protein_coding	1989.37	0.361035	0.115626	3.12243	0.00179363	0.0192955
ENSG00000227201	CNN2P1	processed_pseudogene	13.7522	-0.86885	0.278266	-3.12238	0.00179398	0.0192955
ENSG00000127334	DYRK2	protein_coding	707.415	-0.387232	0.124056	-3.12143	0.00179974	0.0193441
ENSG00000109381	ELF2	protein_coding	1061.62	-0.532155	0.170505	-3.12105	0.00180208	0.0193501
ENSG00000158805	ZNF276	protein_coding	604.019	-0.674553	0.216138	-3.12093	0.00180279	0.0193501
ENSG00000187118	CMC1	protein_coding	181.779	0.425516	0.136384	3.11997	0.00180869	0.0194001
ENSG00000132912	DCTN4	protein_coding	1491.11	-0.60436	0.193776	-3.11886	0.00181554	0.0194601
ENSG00000188167	TMPPE	protein_coding	204.557	-0.502087	0.161074	-3.11712	0.00182626	0.0195615
ENSG00000164164	OTUD4	protein_coding	1744.87	-0.472431	0.151594	-3.11643	0.00183056	0.019592
ENSG00000239672	NME1	protein_coding	59.9469	-0.575364	0.184633	-3.11626	0.00183163	0.019592
ENSG00000075089	ACTR6	protein_coding	255.662	0.516203	0.165686	3.11556	0.00183599	0.0196251
ENSG00000188554	NBR1	protein_coding	3424.49	0.540519	0.173524	3.11496	0.00183971	0.0196514
ENSG00000054967	RELT	protein_coding	2617.08	-0.66346	0.213021	-3.11454	0.00184235	0.019666
ENSG00000130517	PGPEP1	protein_coding	742.447	-0.537505	0.172607	-3.11404	0.00184544	0.0196855
ENSG00000176014	TUBB6	protein_coding	585.397	-0.860118	0.276229	-3.11379	0.00184702	0.0196889
ENSG00000126106	TMEM53	protein_coding	64.3125	0.463931	0.149025	3.11312	0.00185123	0.0197202
ENSG00000204444	APOM	protein_coding	62.7488	-0.605706	0.194585	-3.11281	0.00185317	0.0197274
ENSG00000256087	ZNF432	protein_coding	160.771	-0.494591	0.158902	-3.11256	0.00185474	0.0197306
ENSG00000152102	FAM168B	protein_coding	2210.24	-0.504673	0.162158	-3.11222	0.00185685	0.0197395
ENSG00000188321	ZNF559	protein_coding	149.142	0.661294	0.212545	3.11131	0.00186257	0.0197758
ENSG00000085871	MGST2	protein_coding	701.346	0.510842	0.164197	3.11116	0.00186356	0.0197758
ENSG00000108840	HDAC5	protein_coding	1679.27	0.47731	0.153423	3.11107	0.00186408	0.0197758
ENSG00000135426	TESPA1	protein_coding	31.1462	0.746479	0.240002	3.1103	0.00186897	0.0198142
ENSG00000144031	ANKRD53	protein_coding	3.32164	-0.93596	0.300961	-3.10991	0.00187145	NA
ENSG00000150753	CCT5	protein_coding	2552.12	0.333563	0.10726	3.10986	0.00187179	0.0198282
ENSG00000132953	XPO4	protein_coding	708.394	-0.329119	0.105837	-3.10969	0.00187285	0.0198282
ENSG00000119457	SLC46A2	protein_coding	497.564	0.686932	0.220939	3.10915	0.00187627	0.01984
ENSG00000130598	TNNI2	protein_coding	216.262	-0.639937	0.205826	-3.10911	0.00187652	0.01984
ENSG00000261428	RP11-16P6.1	antisense	14.1027	-0.720407	0.23175	-3.10856	0.00188004	0.0198466
ENSG00000101247	NDUFAF5	protein_coding	200.697	-0.712892	0.229344	-3.10839	0.00188108	0.0198466
ENSG00000138639	ARHGAP24	protein_coding	656.318	-0.611254	0.196683	-3.10782	0.00188474	0.0198466
ENSG00000132646	PCNA	protein_coding	404.739	0.616784	0.198472	3.10765	0.00188579	0.0198466
ENSG00000117133	RPF1	protein_coding	729.068	-0.37556	0.12085	-3.10765	0.00188584	0.0198466
ENSG00000170270	C14orf142	protein_coding	162.991	0.531701	0.171102	3.1075	0.00188678	0.0198466
ENSG00000172113	NME6	protein_coding	235.968	0.515601	0.165928	3.10738	0.00188756	0.0198466
ENSG00000105576	TNPO2	protein_coding	548.057	-0.624441	0.200961	-3.10727	0.00188821	0.0198466
ENSG00000144476	ACKR3	protein_coding	72.0477	-0.912987	0.293845	-3.10704	0.00188971	0.0198466
ENSG00000205352	PRR13	protein_coding	2391.24	0.402686	0.129606	3.10701	0.00188991	0.0198466
ENSG00000261140	RP11-20I23.6	antisense	22.6549	-0.733867	0.236287	-3.10582	0.0018975	0.0199129
ENSG00000147471	PROSC	protein_coding	1305.77	0.492598	0.158683	3.1043	0.00190733	0.0200025
ENSG00000097046	CDC7	protein_coding	63.7197	0.563166	0.181449	3.10372	0.00191106	0.0200282
ENSG00000228451	SDAD1P1	transcribed_processed_pseudogene	18.9859	0.761269	0.245293	3.1035	0.00191244	0.0200291
ENSG00000110002	VWA5A	protein_coding	221.982	0.49988	0.161086	3.10319	0.00191446	0.0200367
ENSG00000181722	ZBTB20	protein_coding	51.8518	-0.613191	0.197647	-3.10245	0.00191924	0.020062
ENSG00000124772	CPNE5	protein_coding	20.199	0.869697	0.280353	3.10215	0.00192123	0.020062
ENSG00000130348	QRSL1	protein_coding	269.943	0.419405	0.135205	3.102	0.00192219	0.020062
ENSG00000089505	CMTM1	protein_coding	23.9635	0.650189	0.209612	3.10186	0.00192307	0.020062
ENSG00000197872	FAM49A	protein_coding	4043.31	-0.408657	0.131747	-3.10182	0.00192333	0.020062
ENSG00000141034	GID4	protein_coding	243.408	0.658636	0.21238	3.10121	0.00192731	0.0200892
ENSG00000173530	TNFRSF10D	protein_coding	561.012	-0.688084	0.221889	-3.10102	0.00192852	0.0200892
ENSG00000173692	PSMD1	protein_coding	1117.12	0.418036	0.13484	3.10023	0.0019337	0.0201215
ENSG00000177917	ARL6IP6	protein_coding	536.035	0.412213	0.132965	3.10015	0.00193421	0.0201215
ENSG00000143554	SLC27A3	protein_coding	1703.2	0.496879	0.160327	3.09917	0.00194067	0.0201752
ENSG00000100744	GSKIP	protein_coding	283.487	0.429692	0.138668	3.09872	0.00194359	0.0201921
ENSG00000141376	BCAS3	protein_coding	364.971	0.364612	0.117679	3.09837	0.00194585	0.020202
ENSG00000164830	OXR1	protein_coding	1398.87	0.449066	0.144964	3.09776	0.00194987	0.0202302
ENSG00000010030	ETV7	protein_coding	83.5154	0.939156	0.3032	3.09748	0.00195176	0.0202364
ENSG00000198223	CSF2RA	protein_coding	1829.47	0.419275	0.135399	3.0966	0.00195754	0.0202827
ENSG00000124145	SDC4	protein_coding	379.954	-0.93985	0.303583	-3.09586	0.00196246	0.0203201
ENSG00000134375	TIMM17A	protein_coding	793.095	-0.398203	0.128637	-3.09555	0.00196445	0.0203273
ENSG00000104691	UBXN8	protein_coding	102.056	0.465928	0.150567	3.09449	0.0019715	0.020384
ENSG00000130559	CAMSAP1	protein_coding	998.596	-0.428045	0.138341	-3.09412	0.00197395	0.020384
ENSG00000168939	SPRY3	protein_coding	49.3751	-0.721196	0.233092	-3.09403	0.00197454	0.020384
ENSG00000127125	PPCS	protein_coding	993.984	0.320867	0.103714	3.09377	0.0019763	0.020384
ENSG00000162591	MEGF6	protein_coding	222.797	-0.71957	0.232589	-3.09374	0.00197649	0.020384
ENSG00000188641	DPYD	protein_coding	7182.99	0.445603	0.144069	3.09298	0.00198159	0.0204099
ENSG00000186854	TRABD2A	protein_coding	28.2273	0.676906	0.218853	3.09297	0.00198164	0.0204099
ENSG00000155926	SLA	protein_coding	3113.51	-0.760415	0.24589	-3.09251	0.00198474	0.0204284
ENSG00000153214	TMEM87B	protein_coding	1013.6	0.458851	0.148424	3.09148	0.00199159	0.0204852
ENSG00000168038	ULK4	protein_coding	92.1409	-0.639706	0.20695	-3.09111	0.00199411	0.0204976
ENSG00000245748	RP11-367J11.2	antisense	7.20569	-0.906559	0.293374	-3.09012	0.00200076	0.0205524
ENSG00000134070	IRAK2	protein_coding	227.505	-0.934129	0.302327	-3.0898	0.00200293	0.0205612
ENSG00000160654	CD3G	protein_coding	11.5938	0.928928	0.300674	3.08948	0.00200505	0.0205693
ENSG00000119559	C19orf25	protein_coding	310.982	0.489624	0.158493	3.08925	0.00200665	0.0205721
ENSG00000163683	SMIM14	protein_coding	1617.91	0.523735	0.169547	3.08903	0.00200811	0.0205735
ENSG00000115816	CEBPZ	protein_coding	500.764	-0.393467	0.127396	-3.08852	0.00201154	0.0205951
ENSG00000151465	CDC123	protein_coding	612.486	0.378304	0.122516	3.0878	0.00201642	0.0206315
ENSG00000177640	CASC2	antisense	7.87312	-0.843369	0.273163	-3.08742	0.00201904	0.0206447
ENSG00000099769	IGFALS	protein_coding	4.92511	-0.896828	0.290644	-3.08566	0.002031	NA
ENSG00000123200	ZC3H13	protein_coding	900.514	0.455892	0.147782	3.0849	0.00203621	0.0208065
ENSG00000164885	CDK5	protein_coding	321.35	0.420135	0.136205	3.08458	0.0020384	0.0208085
ENSG00000171503	ETFDH	protein_coding	284.327	0.440272	0.142739	3.08446	0.00203924	0.0208085
ENSG00000120509	PDZD11	protein_coding	126.329	0.502138	0.162805	3.08429	0.00204042	0.0208085
ENSG00000279071	RP11-83B20.3	TEC	5.73853	-0.929932	0.301592	-3.08341	0.00204645	0.0208564
ENSG00000137845	ADAM10	protein_coding	6124.92	0.377991	0.122612	3.08282	0.00205049	0.0208838
ENSG00000273018	CTD-2303H24.2	processed_transcript	109.493	-0.908809	0.294919	-3.08155	0.00205925	0.0209594
ENSG00000181026	AEN	protein_coding	271.011	-0.77003	0.249951	-3.08072	0.00206499	0.0210039
ENSG00000101493	ZNF516	protein_coding	2286.56	-0.41943	0.136171	-3.08017	0.00206881	0.0210196
ENSG00000110075	PPP6R3	protein_coding	1979.75	-0.248645	0.0807261	-3.08011	0.00206923	0.0210196
ENSG00000182022	CHST15	protein_coding	4035.63	0.375496	0.121918	3.07992	0.00207059	0.0210197
ENSG00000120616	EPC1	protein_coding	1427.58	-0.565288	0.183632	-3.07838	0.00208131	0.0211134
ENSG00000181924	COA4	protein_coding	362.254	0.458906	0.14909	3.07806	0.00208355	0.0211134
ENSG00000006757	PNPLA4	protein_coding	138.459	0.516088	0.16767	3.07801	0.0020839	0.0211134
ENSG00000163635	ATXN7	protein_coding	1656.94	-0.473586	0.153887	-3.07749	0.00208754	0.0211365
ENSG00000088826	SMOX	protein_coding	166.191	-0.822732	0.267356	-3.07729	0.00208893	0.0211368
ENSG00000147533	GOLGA7	protein_coding	1798.85	0.395146	0.128431	3.07673	0.00209282	0.0211624
ENSG00000154874	CCDC144B	transcribed_unprocessed_pseudogene	96.1469	-0.918607	0.298609	-3.07629	0.00209597	0.0211805
ENSG00000113716	HMGXB3	protein_coding	789.868	-0.451406	0.146753	-3.07595	0.00209833	0.0211887
ENSG00000172578	KLHL6	protein_coding	852.357	0.53817	0.174978	3.07564	0.00210049	0.0211887
ENSG00000171492	LRRC8D	protein_coding	1638.15	0.600083	0.195119	3.07547	0.00210172	0.0211887
ENSG00000168887	C2orf68	protein_coding	875.112	0.376918	0.122559	3.07539	0.00210224	0.0211887
ENSG00000065060	UHRF1BP1	protein_coding	779.794	-0.548263	0.178309	-3.07478	0.00210655	0.0212184
ENSG00000142892	PIGK	protein_coding	500.504	0.379005	0.123297	3.07393	0.00211258	0.021248
ENSG00000165934	CPSF2	protein_coding	1047.4	0.554625	0.180433	3.07386	0.0021131	0.021248
ENSG00000099875	MKNK2	protein_coding	5292.51	-0.427534	0.13909	-3.07379	0.00211359	0.021248
ENSG00000137947	GTF2B	protein_coding	776.112	-0.459342	0.149457	-3.0734	0.00211637	0.0212582
ENSG00000136143	SUCLA2	protein_coding	439.259	0.525566	0.171018	3.07316	0.00211807	0.0212582
ENSG00000113460	BRIX1	protein_coding	231.318	-0.438659	0.142743	-3.07307	0.00211871	0.0212582
ENSG00000165476	REEP3	protein_coding	977.976	0.436695	0.142188	3.07124	0.0021317	0.0213748
ENSG00000162384	C1orf123	protein_coding	629.106	0.379453	0.1236	3.07001	0.00214053	0.021416
ENSG00000197713	RPE	protein_coding	372.645	0.618966	0.20162	3.06997	0.00214083	0.021416
ENSG00000174446	SNAPC5	protein_coding	238.452	0.371257	0.120937	3.06985	0.00214165	0.021416
ENSG00000066422	ZBTB11	protein_coding	901.939	-0.529817	0.172608	-3.06949	0.00214425	0.021416
ENSG00000275700	AATF	protein_coding	1337.3	0.361975	0.117929	3.06943	0.00214464	0.021416
ENSG00000257497	RP11-585P4.5	antisense	22.3011	-0.689639	0.224682	-3.0694	0.00214487	0.021416
ENSG00000277687	RP11-427L15.2	sense_intronic	67.7234	-0.828584	0.269957	-3.06932	0.00214546	0.021416
ENSG00000108797	CNTNAP1	protein_coding	46.9739	-0.745587	0.243034	-3.06783	0.00215621	0.0215095
ENSG00000188868	ZNF563	protein_coding	5.9713	0.846205	0.275853	3.06759	0.00215791	0.0215127
ENSG00000169682	SPNS1	protein_coding	50.9503	-0.848323	0.276562	-3.06738	0.00215941	0.0215138
ENSG00000240163	RP11-745A24.1	processed_pseudogene	9.17132	-0.928776	0.302911	-3.06617	0.00216821	0.0215876
ENSG00000156052	GNAQ	protein_coding	4010.42	-0.426225	0.139035	-3.06559	0.00217242	0.0216157
ENSG00000144736	SHQ1	protein_coding	182.327	0.367958	0.120046	3.06515	0.00217563	0.0216277
ENSG00000166526	ZNF3	protein_coding	347.277	-0.388609	0.126787	-3.06504	0.0021764	0.0216277
ENSG00000117322	CR2	protein_coding	3.81923	0.917287	0.299291	3.06486	0.0021777	NA
ENSG00000178607	ERN1	protein_coding	1116.33	-0.438931	0.143223	-3.06467	0.00217908	0.0216404
ENSG00000139508	SLC46A3	protein_coding	459.317	0.494261	0.16131	3.06404	0.00218369	0.0216605
ENSG00000115526	CHST10	protein_coding	24.832	-0.796725	0.260038	-3.06388	0.0021849	0.0216605
ENSG00000142405	NLRP12	protein_coding	1876.61	0.496705	0.162119	3.06382	0.00218528	0.0216605
ENSG00000129038	LOXL1	protein_coding	2.98729	-0.901369	0.294202	-3.06378	0.00218563	NA
ENSG00000146872	TLK2	protein_coding	884.891	-0.325443	0.10624	-3.0633	0.00218914	0.0216726
ENSG00000181826	RELL1	protein_coding	341.971	-0.59405	0.193926	-3.06327	0.00218929	0.0216726
ENSG00000186827	TNFRSF4	protein_coding	4.82331	-0.926759	0.302619	-3.06246	0.00219523	NA
ENSG00000167065	DUSP18	protein_coding	137.528	0.449503	0.146782	3.06239	0.00219578	0.0217229
ENSG00000149289	ZC3H12C	protein_coding	229.945	-0.611576	0.199741	-3.06184	0.00219978	0.0217487
ENSG00000260179	RP5-902P8.12	lincRNA	12.0584	-0.771554	0.252055	-3.06105	0.0022056	0.0217924
ENSG00000197769	MAP1LC3C	protein_coding	8.60271	-0.853709	0.278923	-3.06073	0.00220799	0.0217942
ENSG00000131373	HACL1	protein_coding	272.651	0.334136	0.109172	3.06065	0.00220859	0.0217942
ENSG00000101336	HCK	protein_coding	13359.2	0.461445	0.150801	3.05996	0.00221363	0.0218293
ENSG00000159479	MED8	protein_coding	405.456	0.316097	0.103307	3.05979	0.00221495	0.0218293
ENSG00000166477	LEO1	protein_coding	152.811	0.441298	0.144266	3.05892	0.00222134	0.0218717
ENSG00000138835	RGS3	protein_coding	445.33	0.528084	0.172652	3.05866	0.00222332	0.0218717
ENSG00000105939	ZC3HAV1	protein_coding	1827.71	0.448479	0.146633	3.05851	0.0022244	0.0218717
ENSG00000010803	SCMH1	protein_coding	197.268	-0.32972	0.107807	-3.05845	0.00222488	0.0218717
ENSG00000278918	CTD-2267D19.1	TEC	145.782	-0.775923	0.253763	-3.05766	0.00223071	0.0219151
ENSG00000272902	RP11-299H21.1	lincRNA	14.0572	0.735259	0.240525	3.0569	0.00223639	0.0219307
ENSG00000104142	VPS18	protein_coding	919.541	-0.391549	0.128088	-3.05686	0.00223668	0.0219307
ENSG00000239127	SNORD125	snoRNA	10.3194	-0.762173	0.249339	-3.05678	0.00223729	0.0219307
ENSG00000232926	AC000078.5	processed_pseudogene	15.4155	-0.906973	0.296717	-3.05669	0.00223794	0.0219307
ENSG00000266074	BAHCC1	protein_coding	394.838	-0.435703	0.142617	-3.05506	0.00225017	0.0220366
ENSG00000173812	EIF1	protein_coding	30714.8	-0.46432	0.151999	-3.05475	0.00225245	0.0220451
ENSG00000185485	SDHAP1	transcribed_unprocessed_pseudogene	148.244	-0.717192	0.234795	-3.05454	0.00225406	0.0220456
ENSG00000100897	DCAF11	protein_coding	1374.99	0.287125	0.0940066	3.0543	0.00225585	0.0220456
ENSG00000159596	TMEM69	protein_coding	470.778	0.47538	0.155649	3.05418	0.00225676	0.0220456
ENSG00000260793	RP5-882C2.2	antisense	96.5159	-0.452856	0.148301	-3.05362	0.00226099	0.022073
ENSG00000157343	ARMC12	protein_coding	6.82939	-0.865256	0.283414	-3.05298	0.00226583	0.0220956
ENSG00000111639	MRPL51	protein_coding	558.581	0.4566	0.149561	3.05294	0.00226614	0.0220956
ENSG00000106546	AHR	protein_coding	9258.64	-0.778057	0.254965	-3.05162	0.00227609	0.0221787
ENSG00000122861	PLAU	protein_coding	59.4729	-0.925548	0.303323	-3.05137	0.00227803	0.0221837
ENSG00000151233	GXYLT1	protein_coding	388.581	0.40136	0.131557	3.05084	0.00228202	0.0222087
ENSG00000177683	THAP5	protein_coding	273.213	0.466659	0.152999	3.05009	0.00228777	0.0222496
ENSG00000266709	MGC12916	lincRNA	19.5751	-0.912658	0.299241	-3.04991	0.00228911	0.0222496
ENSG00000115839	RAB3GAP1	protein_coding	1044.99	0.270287	0.0886269	3.04972	0.00229052	0.0222496
ENSG00000132274	TRIM22	protein_coding	5967.05	0.610019	0.20009	3.04873	0.00229812	0.0222962
ENSG00000257108	NHLRC4	protein_coding	14.167	0.779749	0.255763	3.04872	0.00229819	0.0222962
ENSG00000121104	FAM117A	protein_coding	619.364	0.467025	0.153201	3.04845	0.00230026	0.022298
ENSG00000167978	SRRM2	protein_coding	19358.2	-0.408795	0.134112	-3.04816	0.00230251	0.022298
ENSG00000174243	DDX23	protein_coding	1222.11	0.499533	0.163891	3.04795	0.00230405	0.022298
ENSG00000119986	AVPI1	protein_coding	324.285	-0.924063	0.303176	-3.04795	0.00230412	0.022298
ENSG00000204564	C6orf136	protein_coding	145.81	-0.390979	0.128298	-3.04744	0.00230803	0.0223153
ENSG00000167333	TRIM68	protein_coding	78.7627	0.670958	0.220201	3.04703	0.00231117	0.0223153
ENSG00000169019	COMMD8	protein_coding	909.971	0.515548	0.169202	3.04695	0.00231179	0.0223153
ENSG00000143437	ARNT	protein_coding	1530.07	0.187692	0.0616003	3.04693	0.00231192	0.0223153
ENSG00000188042	ARL4C	protein_coding	3648.61	-0.786934	0.258296	-3.04663	0.00231422	0.0223153
ENSG00000096717	SIRT1	protein_coding	874.568	-0.508486	0.166903	-3.04659	0.00231452	0.0223153
ENSG00000185721	DRG1	protein_coding	684.702	0.370951	0.121773	3.04626	0.00231704	0.0223158
ENSG00000059804	SLC2A3	protein_coding	21213.6	-0.715215	0.234788	-3.04621	0.00231744	0.0223158
ENSG00000128284	APOL3	protein_coding	1684.46	0.494633	0.162436	3.04509	0.00232608	0.0223851
ENSG00000112062	MAPK14	protein_coding	2311.11	0.338886	0.111305	3.04466	0.00232947	0.0224039
ENSG00000070495	JMJD6	protein_coding	1443.49	-0.634318	0.208362	-3.0443	0.00233223	0.0224165
ENSG00000112339	HBS1L	protein_coding	694.897	-0.288834	0.0949044	-3.04342	0.00233909	0.0224685
ENSG00000108468	CBX1	protein_coding	956.368	0.482038	0.158406	3.04306	0.00234186	0.022478
ENSG00000101343	CRNKL1	protein_coding	567.323	-0.38895	0.127827	-3.04278	0.00234403	0.022478
ENSG00000184857	TMEM186	protein_coding	34.1311	0.56968	0.187226	3.04273	0.00234441	0.022478
ENSG00000176155	CCDC57	protein_coding	470.2	-0.613356	0.201623	-3.04209	0.00234943	0.0225022
ENSG00000280011	RP4-671O14.7	antisense	47.1515	-0.644738	0.211946	-3.04199	0.00235019	0.0225022
ENSG00000213762	ZNF134	protein_coding	307.096	-0.550792	0.181094	-3.04147	0.00235425	0.0225022
ENSG00000174123	TLR10	protein_coding	50.8125	0.594924	0.195623	3.04118	0.00235654	0.0225022
ENSG00000101278	RPS10L	processed_pseudogene	14.307	-0.851317	0.279946	-3.041	0.00235792	0.0225022
ENSG00000185201	IFITM2	protein_coding	4489.14	0.715057	0.235141	3.04097	0.00235819	0.0225022
ENSG00000164151	ICE1	protein_coding	1016.25	-0.399335	0.131321	-3.04091	0.00235863	0.0225022
ENSG00000163464	CXCR1	protein_coding	147.339	0.92128	0.302986	3.04067	0.00236052	0.0225022
ENSG00000165071	TMEM71	protein_coding	2589.94	0.507908	0.167041	3.04062	0.00236092	0.0225022
ENSG00000197961	ZNF121	protein_coding	445.147	-0.637402	0.209634	-3.04056	0.00236141	0.0225022
ENSG00000146833	TRIM4	protein_coding	669.646	0.384625	0.12652	3.04003	0.00236556	0.0225279
ENSG00000163795	ZNF513	protein_coding	367.615	-0.390116	0.128342	-3.03966	0.0023685	0.02253
ENSG00000062716	VMP1	protein_coding	5864.6	0.47632	0.156719	3.03933	0.00237108	0.02253
ENSG00000126226	PCID2	protein_coding	518.054	0.397113	0.130663	3.0392	0.00237203	0.02253
ENSG00000189091	SF3B3	protein_coding	1494.65	0.440137	0.144831	3.03898	0.00237378	0.02253
ENSG00000103502	CDIPT	protein_coding	1196.46	0.409693	0.134815	3.03893	0.00237417	0.02253
ENSG00000224531	SMIM13	protein_coding	393.551	-0.581669	0.191408	-3.03889	0.00237448	0.02253
ENSG00000109606	DHX15	protein_coding	2231.84	-0.531786	0.175013	-3.03856	0.00237715	0.0225387
ENSG00000111707	SUDS3	protein_coding	715.303	0.268292	0.0883002	3.03841	0.00237829	0.0225387
ENSG00000013374	NUB1	protein_coding	1532.3	0.495224	0.163005	3.03808	0.00238089	0.0225496
ENSG00000145779	TNFAIP8	protein_coding	1290.68	0.33685	0.110895	3.03756	0.00238503	0.022575
ENSG00000108559	NUP88	protein_coding	408.642	0.330452	0.1088	3.03724	0.00238755	0.0225851
ENSG00000158290	CUL4B	protein_coding	1414.3	0.305868	0.100723	3.03674	0.00239152	0.0226055
ENSG00000121775	TMEM39B	protein_coding	399.658	0.362826	0.119484	3.0366	0.00239262	0.0226055
ENSG00000198625	MDM4	protein_coding	1826.36	-0.689402	0.227068	-3.0361	0.00239657	0.0226291
ENSG00000136933	RABEPK	protein_coding	195.535	0.430872	0.14193	3.03581	0.00239892	0.0226363
ENSG00000122694	GLIPR2	protein_coding	8667.56	0.394053	0.129809	3.03564	0.00240025	0.0226363
ENSG00000137814	HAUS2	protein_coding	396.135	-0.287755	0.0947981	-3.03546	0.00240172	0.0226364
ENSG00000205302	SNX2	protein_coding	4974.48	0.31177	0.102726	3.03497	0.00240557	0.022659
ENSG00000263002	ZNF234	protein_coding	43.4304	0.731133	0.240922	3.03473	0.00240754	0.0226638
ENSG00000151490	PTPRO	protein_coding	207.643	0.769452	0.253638	3.03367	0.00241602	0.0227299
ENSG00000166145	SPINT1	protein_coding	888.489	0.586578	0.19342	3.03266	0.00242408	0.0227699
ENSG00000269343	ZNF587B	protein_coding	92.1676	-0.728578	0.240256	-3.03251	0.00242527	0.0227699
ENSG00000153922	CHD1	protein_coding	2759.28	-0.746994	0.246333	-3.03245	0.00242575	0.0227699
ENSG00000188404	SELL	protein_coding	24126.7	0.519459	0.171303	3.0324	0.00242613	0.0227699
ENSG00000270696	RP11-342K6.1	antisense	43.7531	0.592767	0.19549	3.03222	0.00242764	0.02277
ENSG00000151164	RAD9B	protein_coding	30.9705	0.620689	0.20471	3.03204	0.00242907	0.02277
ENSG00000005483	KMT2E	protein_coding	2573.42	-0.393737	0.129881	-3.03152	0.00243324	0.0227953
ENSG00000260943	RP11-476D10.1	lincRNA	12.3557	0.920409	0.303647	3.03118	0.00243598	0.0228072
ENSG00000078304	PPP2R5C	protein_coding	2966.06	0.235875	0.0778572	3.02958	0.00244892	0.0229146
ENSG00000127452	FBXL12	protein_coding	582.334	-0.396227	0.130843	-3.02827	0.00245956	0.0229819
ENSG00000100068	LRP5L	protein_coding	133.754	-0.794715	0.262435	-3.02824	0.00245983	0.0229819
ENSG00000248367	CTB-129O4.1	antisense	1.11374	0.863938	0.2853	3.02818	0.00246035	NA
ENSG00000164144	ARFIP1	protein_coding	551.677	0.589349	0.194624	3.02815	0.00246055	0.0229819
ENSG00000101811	CSTF2	protein_coding	131.78	0.481127	0.158909	3.0277	0.00246426	0.0229853
ENSG00000210082	MT-RNR2	Mt_rRNA	75440.1	0.464088	0.153294	3.02745	0.0024663	0.0229853
ENSG00000185561	TLCD2	protein_coding	13.6102	-0.899208	0.297025	-3.02738	0.00246683	0.0229853
ENSG00000103769	RAB11A	protein_coding	2898.39	0.395498	0.13064	3.02738	0.00246683	0.0229853
ENSG00000146072	TNFRSF21	protein_coding	260.498	-0.916658	0.302886	-3.02641	0.00247474	0.0230452
ENSG00000013275	PSMC4	protein_coding	1157.75	0.323565	0.106922	3.02618	0.00247668	0.0230495
ENSG00000104866	PPP1R37	protein_coding	311.436	-0.420923	0.139111	-3.0258	0.00247977	0.0230644
ENSG00000273987	RP11-585P4.6	sense_intronic	3.59541	-0.903797	0.298753	-3.02523	0.00248446	NA
ENSG00000128245	YWHAH	protein_coding	1659.44	0.585055	0.193426	3.02469	0.00248889	0.0231322
ENSG00000125166	GOT2	protein_coding	450.188	0.454064	0.150126	3.02455	0.00249004	0.0231322
ENSG00000166130	IKBIP	protein_coding	447.686	0.596842	0.197357	3.02417	0.00249319	0.0231335
ENSG00000124713	GNMT	protein_coding	34.4936	-0.82544	0.272969	-3.02393	0.00249511	0.0231335
ENSG00000162747	FCGR3B	protein_coding	844.859	0.917969	0.303576	3.02385	0.00249577	0.0231335
ENSG00000254595	CTD-2010I16.1	processed_pseudogene	21.7984	-0.832384	0.275276	-3.02381	0.00249613	0.0231335
ENSG00000184068	RP5-821D11.7	antisense	82.3428	-0.714335	0.236257	-3.02355	0.00249828	0.0231396
ENSG00000034713	GABARAPL2	protein_coding	1506.06	0.390133	0.1291	3.02195	0.00251155	0.0232487
ENSG00000129194	SOX15	protein_coding	27.4428	-0.703164	0.23274	-3.02124	0.00251744	0.0232878
ENSG00000266947	RP11-799D4.4	antisense	17.985	0.749795	0.248188	3.02108	0.00251877	0.0232878
ENSG00000185477	GPRIN3	protein_coding	613.681	-0.811095	0.268518	-3.02064	0.00252244	0.0232987
ENSG00000010671	BTK	protein_coding	3805.52	0.40983	0.135679	3.02058	0.00252295	0.0232987
ENSG00000100266	PACSIN2	protein_coding	1862.23	0.318003	0.105316	3.01952	0.00253173	0.0233659
ENSG00000149792	MRPL49	protein_coding	408.565	0.365718	0.12115	3.01871	0.00253853	0.0234147
ENSG00000147996	CBWD5	protein_coding	180.904	0.631822	0.209318	3.01848	0.00254046	0.0234166
ENSG00000179119	SPTY2D1	protein_coding	1177.43	-0.585122	0.193856	-3.01833	0.00254175	0.0234166
ENSG00000160593	AMICA1	protein_coding	13070.9	0.332618	0.110229	3.01752	0.00254855	0.0234654
ENSG00000160408	ST6GALNAC6	protein_coding	496.222	-0.42944	0.14235	-3.01679	0.00255464	0.0235075
ENSG00000182841	RRP7B	transcribed_unprocessed_pseudogene	57.2775	-0.805657	0.267106	-3.01624	0.0025593	0.0235365
ENSG00000169413	RNASE6	protein_coding	3193.93	0.516686	0.171377	3.01491	0.00257059	0.023606
ENSG00000066379	ZNRD1	protein_coding	96.1335	0.439608	0.145812	3.0149	0.00257067	0.023606
ENSG00000103490	PYCARD	protein_coding	1732.55	0.507253	0.168254	3.01481	0.00257142	0.023606
ENSG00000236859	NIFK-AS1	antisense	48.9776	0.628146	0.208383	3.01437	0.00257509	0.0236258
ENSG00000006606	CCL26	protein_coding	0.816077	-0.798544	0.264916	-3.01433	0.00257549	NA
ENSG00000185163	DDX51	protein_coding	416.685	-0.423475	0.140519	-3.01364	0.00258132	0.023669
ENSG00000138081	FBXO11	protein_coding	1152.35	-0.47686	0.158295	-3.01248	0.00259118	0.0237454
ENSG00000142731	PLK4	protein_coding	36.5697	-0.607091	0.201538	-3.01229	0.00259284	0.0237466
ENSG00000178927	C17orf62	protein_coding	2957.27	0.472171	0.156846	3.01042	0.0026089	0.0238676
ENSG00000134954	ETS1	protein_coding	334.969	0.738088	0.245183	3.01036	0.0026094	0.0238676
ENSG00000139572	GPR84	protein_coding	113.337	-0.82289	0.273366	-3.01021	0.00261067	0.0238676
ENSG00000123739	PLA2G12A	protein_coding	115.988	0.433585	0.14405	3.00995	0.00261287	0.0238737
ENSG00000232721	RP11-403I13.5	lincRNA	7.85966	0.826474	0.274646	3.00924	0.00261904	0.0239044
ENSG00000069943	PIGB	protein_coding	220.102	0.442712	0.147119	3.00921	0.0026193	0.0239044
ENSG00000074201	CLNS1A	protein_coding	1549.76	0.395073	0.131308	3.00874	0.00262333	0.0239271
ENSG00000150456	N6AMT2	protein_coding	27.7285	0.566411	0.188273	3.00846	0.00262574	0.0239351
ENSG00000260539	GLG1	lincRNA	188.933	0.555781	0.184784	3.00773	0.00263211	0.023979
ENSG00000181744	C3orf58	protein_coding	1601.21	-0.589968	0.196177	-3.00733	0.00263554	0.0239963
ENSG00000168876	ANKRD49	protein_coding	443.469	-0.49615	0.165024	-3.00652	0.00264253	0.0240458
ENSG00000196313	POM121	protein_coding	1144.8	-0.426057	0.141748	-3.00573	0.00264945	0.0240768
ENSG00000260708	CTA-29F11.1	antisense	134.191	-0.777824	0.258782	-3.00571	0.0026496	0.0240768
ENSG00000011132	APBA3	protein_coding	246.152	0.441865	0.147021	3.00546	0.00265182	0.0240768
ENSG00000261087	KB-1460A1.5	lincRNA	10.5024	0.759849	0.252826	3.00542	0.00265213	0.0240768
ENSG00000184988	TMEM106A	protein_coding	290.749	0.599576	0.199543	3.00475	0.00265801	0.0241149
ENSG00000138050	THUMPD2	protein_coding	185.268	-0.636671	0.211909	-3.00446	0.00266053	0.0241149
ENSG00000232630	PRPS1P2	processed_pseudogene	27.7401	-0.828604	0.275796	-3.00441	0.00266099	0.0241149
ENSG00000171865	RNASEH1	protein_coding	248.779	-0.309686	0.103098	-3.00382	0.00266616	0.0241434
ENSG00000231705	RP11-432J24.2	lincRNA	8.30916	-0.819106	0.272712	-3.00355	0.00266848	0.0241434
ENSG00000279108	CTC-490E21.11	TEC	4.28159	-0.886199	0.295051	-3.00354	0.00266858	NA
ENSG00000081059	TCF7	protein_coding	66.8209	0.856993	0.28533	3.00351	0.00266881	0.0241434
ENSG00000121764	HCRTR1	protein_coding	6.31397	-0.897018	0.298674	-3.00334	0.00267035	0.0241434
ENSG00000143322	ABL2	protein_coding	422.688	-0.48882	0.16277	-3.00313	0.00267216	0.0241458
ENSG00000259943	RP1-39G22.7	antisense	50.433	0.595967	0.198482	3.00263	0.00267656	0.0241715
ENSG00000147526	TACC1	protein_coding	4553.81	-0.472074	0.157239	-3.00227	0.00267975	0.0241862
ENSG00000247679	RP11-1277A3.1	antisense	37.9352	-0.645377	0.214989	-3.0019	0.00268299	0.0242014
ENSG00000170315	UBB	protein_coding	3016.64	0.519021	0.172919	3.00153	0.00268629	0.0242149
ENSG00000143815	LBR	protein_coding	2661.87	0.258272	0.0860559	3.00121	0.00268906	0.0242149
ENSG00000144218	AFF3	protein_coding	167.673	-0.719364	0.239692	-3.0012	0.00268916	0.0242149
ENSG00000274281	RP11-326N17.2	lincRNA	23.4111	-0.744049	0.247971	-3.00055	0.00269495	0.024253
ENSG00000272707	RP11-534C12.1	lincRNA	1.9548	-0.898803	0.299578	-3.00023	0.00269772	NA
ENSG00000166181	API5	protein_coding	1567.44	0.340697	0.113569	2.99992	0.0027005	0.0242761
ENSG00000151092	NGLY1	protein_coding	599.392	0.328312	0.109441	2.99991	0.00270064	0.0242761
ENSG00000276008	RP11-137H15.4	lincRNA	233.923	-0.462975	0.154376	-2.99901	0.00270862	0.0243337
ENSG00000169432	SCN9A	protein_coding	40.3836	0.841817	0.280734	2.99863	0.00271193	0.0243432
ENSG00000198829	SUCNR1	protein_coding	13.3565	0.809197	0.269864	2.99854	0.0027128	0.0243432
ENSG00000205707	LYRM5	protein_coding	212.811	0.379124	0.126452	2.99816	0.00271614	0.0243471
ENSG00000187601	MAGEH1	protein_coding	91.6778	0.643602	0.214667	2.99813	0.00271637	0.0243471
ENSG00000064115	TM7SF3	protein_coding	1052.23	0.343852	0.114712	2.99752	0.00272182	0.0243819
ENSG00000134802	SLC43A3	protein_coding	617.432	0.367633	0.122653	2.99735	0.00272339	0.0243819
ENSG00000184371	CSF1	protein_coding	165.582	-0.897941	0.299663	-2.9965	0.002731	0.0244308
ENSG00000110811	LEPREL2	protein_coding	14.1162	-0.843634	0.28155	-2.99639	0.002732	0.0244308
ENSG00000136280	CCM2	protein_coding	1349.39	0.465271	0.155289	2.99615	0.00273408	0.0244354
ENSG00000130305	NSUN5	protein_coding	339.515	0.459333	0.153321	2.99589	0.00273646	0.0244425
ENSG00000169282	KCNAB1	protein_coding	18.3036	-0.696946	0.232655	-2.99561	0.00273892	0.0244505
ENSG00000149658	YTHDF1	protein_coding	1334.36	-0.332146	0.110911	-2.99471	0.00274708	0.0245092
ENSG00000145414	NAF1	protein_coding	146.225	-0.454814	0.151926	-2.99366	0.00275653	0.0245795
ENSG00000252245	RNU6-736P	snRNA	2.69947	-0.903285	0.301789	-2.9931	0.00276159	NA
ENSG00000231721	LINC-PINT	antisense	242.5	-0.69867	0.23348	-2.99242	0.00276778	0.0246656
ENSG00000214145	LINC00887	lincRNA	6.28296	-0.853213	0.285182	-2.99182	0.00277319	0.0246921
ENSG00000108175	ZMIZ1	protein_coding	5925.15	-0.457873	0.153046	-2.99174	0.00277393	0.0246921
ENSG00000166707	ZCCHC18	protein_coding	1.06843	0.839424	0.280582	2.99172	0.00277409	NA
ENSG00000059573	ALDH18A1	protein_coding	80.8829	0.537601	0.179732	2.99113	0.00277951	0.0247248
ENSG00000143751	SDE2	protein_coding	975.291	-0.522274	0.174616	-2.99099	0.00278078	0.0247248
ENSG00000171988	JMJD1C	protein_coding	5013.58	-0.747176	0.249871	-2.99025	0.00278747	0.0247701
ENSG00000176542	KIAA2018	protein_coding	1289.87	-0.49525	0.165665	-2.98946	0.00279467	0.0248199
ENSG00000168802	CHTF8	protein_coding	1354.51	0.444287	0.148655	2.9887	0.00280164	0.0248676
ENSG00000109775	UFSP2	protein_coding	170.992	0.438735	0.146818	2.9883	0.00280538	0.0248866
ENSG00000163219	ARHGAP25	protein_coding	1074.94	0.299832	0.100345	2.98801	0.00280801	0.0248956
ENSG00000205659	LIN52	protein_coding	109.852	0.464473	0.155472	2.98751	0.00281262	0.024918
ENSG00000274021	RP11-823E8.3	lincRNA	118.479	-0.810678	0.271367	-2.98739	0.00281373	0.024918
ENSG00000136152	COG3	protein_coding	711.026	-0.483902	0.162106	-2.9851	0.0028349	0.0250839
ENSG00000171777	RASGRP4	protein_coding	3612.83	0.319829	0.107145	2.98501	0.0028357	0.0250839
ENSG00000278970	HEIH	TEC	576.305	0.42732	0.143183	2.98443	0.00284111	0.0251072
ENSG00000141510	TP53	protein_coding	530.497	0.576751	0.193265	2.98425	0.00284277	0.0251072
ENSG00000166946	CCNDBP1	protein_coding	2098.57	0.355735	0.119206	2.9842	0.00284318	0.0251072
ENSG00000141367	CLTC	protein_coding	5297.68	0.288842	0.0968077	2.98367	0.00284815	0.0251075
ENSG00000118496	FBXO30	protein_coding	345.846	-0.539184	0.180716	-2.98361	0.00284873	0.0251075
ENSG00000136141	LRCH1	protein_coding	491.747	-0.379772	0.127286	-2.9836	0.00284878	0.0251075
ENSG00000185432	METTL7A	protein_coding	2124.12	0.696984	0.233613	2.98351	0.00284967	0.0251075
ENSG00000130749	ZC3H4	protein_coding	692.107	0.492197	0.165014	2.98276	0.00285667	0.0251177
ENSG00000026036	RTEL1-TNFRSF6B	protein_coding	37.793	-0.818743	0.274493	-2.98274	0.00285678	0.0251177
ENSG00000105953	OGDH	protein_coding	3998.34	0.438676	0.147079	2.98258	0.00285829	0.0251177
ENSG00000124602	UNC5CL	protein_coding	31.6741	-0.673214	0.225728	-2.98242	0.00285981	0.0251177
ENSG00000182872	RBM10	protein_coding	780.053	0.307059	0.102959	2.98233	0.00286064	0.0251177
ENSG00000135535	CD164	protein_coding	7650.09	0.285932	0.0958776	2.98227	0.00286122	0.0251177
ENSG00000148200	NR6A1	protein_coding	108.488	-0.571276	0.191564	-2.98217	0.00286214	0.0251177
ENSG00000061936	SFSWAP	protein_coding	1168.34	-0.29845	0.100099	-2.98154	0.00286802	0.025155
ENSG00000135525	MAP7	protein_coding	73.8548	0.824742	0.2767	2.98064	0.00287649	0.0252151
ENSG00000241732	RP11-38P22.2	lincRNA	33.9538	-0.805632	0.27031	-2.9804	0.00287873	0.0252206
ENSG00000234617	SNRK-AS1	antisense	6.26947	-0.853094	0.286341	-2.97929	0.00288914	0.0252975
ENSG00000177054	ZDHHC13	protein_coding	134.989	0.544181	0.182678	2.97891	0.00289274	0.0253031
ENSG00000196411	EPHB4	protein_coding	108.301	0.729519	0.244897	2.97888	0.00289304	0.0253031
ENSG00000188785	ZNF548	protein_coding	226.206	-0.462805	0.155379	-2.97857	0.00289602	0.0253149
ENSG00000273314	RP5-1136G13.2	antisense	27.4248	0.779239	0.261657	2.97809	0.00290053	0.0253401
ENSG00000268043	NBPF12	protein_coding	356.541	-0.538847	0.180964	-2.97765	0.00290471	0.0253491
ENSG00000103381	CPPED1	protein_coding	9196.08	0.402642	0.135222	2.97763	0.00290483	0.0253491
ENSG00000198721	ECI2	protein_coding	135.726	0.47153	0.158392	2.97697	0.00291112	0.0253898
ENSG00000181192	DHTKD1	protein_coding	561.769	0.393389	0.132195	2.97582	0.00292206	0.0254637
ENSG00000198026	ZNF335	protein_coding	822.741	-0.527796	0.17737	-2.97568	0.00292336	0.0254637
ENSG00000102780	DGKH	protein_coding	123.572	-0.595954	0.200283	-2.97556	0.00292451	0.0254637
ENSG00000182327	GLTPD2	protein_coding	65.1655	-0.692868	0.232897	-2.975	0.00292989	0.0254963
ENSG00000092964	DPYSL2	protein_coding	2629.65	0.659991	0.22186	2.9748	0.00293178	0.0254985
ENSG00000125826	RBCK1	protein_coding	2256.18	0.421205	0.141599	2.97462	0.00293348	0.025499
ENSG00000186566	GPATCH8	protein_coding	1660.68	-0.257867	0.0867006	-2.97423	0.00293727	0.0255177
ENSG00000120949	TNFRSF8	protein_coding	403.498	0.610838	0.205435	2.97338	0.00294539	0.0255739
ENSG00000241764	AC002467.7	antisense	23.4672	0.755417	0.254108	2.97282	0.00295079	0.025586
ENSG00000180573	HIST1H2AC	protein_coding	338.988	0.686165	0.230824	2.97268	0.00295216	0.025586
ENSG00000118515	SGK1	protein_coding	25304.5	-0.75908	0.255354	-2.97266	0.00295233	0.025586
ENSG00000169981	ZNF35	protein_coding	94.4883	-0.504606	0.169755	-2.97255	0.00295337	0.025586
ENSG00000072210	ALDH3A2	protein_coding	1080.87	0.343046	0.115438	2.97169	0.00296167	0.0256436
ENSG00000229809	ZNF688	protein_coding	256.251	0.475093	0.159897	2.97125	0.00296589	0.0256659
ENSG00000254842	RP11-890B15.2	lincRNA	0.866694	-0.820065	0.276021	-2.97103	0.00296806	NA
ENSG00000143110	C1orf162	protein_coding	4604.19	0.457385	0.153963	2.97074	0.00297082	0.0256942
ENSG00000240449	RP4-584D14.5	antisense	10.8138	-0.76356	0.257102	-2.96987	0.00297922	0.0257464
ENSG00000153179	RASSF3	protein_coding	3990.81	0.481146	0.162021	2.96965	0.00298135	0.0257464
ENSG00000083312	TNPO1	protein_coding	1613.42	-0.344487	0.116004	-2.96961	0.00298182	0.0257464
ENSG00000146376	ARHGAP18	protein_coding	510.338	0.49187	0.165662	2.96911	0.00298663	0.0257736
ENSG00000132361	CLUH	protein_coding	544.05	-0.437843	0.147502	-2.96839	0.00299361	0.0258195
ENSG00000269506	RP11-571I18.5	antisense	16.2397	-0.808418	0.272451	-2.96721	0.00300519	0.025905
ENSG00000184635	ZNF93	protein_coding	51.6416	0.545289	0.183829	2.96628	0.00301423	0.0259685
ENSG00000235652	RP11-545I5.3	antisense	46.6875	-0.608315	0.205161	-2.96506	0.00302624	0.0260575
ENSG00000179364	PACS2	protein_coding	1142.37	-0.315067	0.106288	-2.96426	0.00303409	0.0261053
ENSG00000112130	RNF8	protein_coding	141.834	0.450676	0.152042	2.96416	0.00303515	0.0261053
ENSG00000132541	HRSP12	protein_coding	98.6723	0.469594	0.158444	2.96379	0.00303878	0.026122
ENSG00000102316	MAGED2	protein_coding	927.976	0.38829	0.131045	2.96303	0.00304631	0.0261723
ENSG00000144711	IQSEC1	protein_coding	4179.55	-0.572616	0.193304	-2.96225	0.00305398	0.0262133
ENSG00000163945	UVSSA	protein_coding	599.686	-0.542423	0.183115	-2.9622	0.00305445	0.0262133
ENSG00000111726	CMAS	protein_coding	575.267	0.409148	0.138133	2.96199	0.00305655	0.0262169
ENSG00000189077	TMEM120A	protein_coding	804.053	0.370035	0.124948	2.96151	0.00306137	0.0262437
ENSG00000177200	CHD9	protein_coding	1221.34	-0.441421	0.149062	-2.96134	0.00306306	0.0262437
ENSG00000047634	SCML1	protein_coding	172.135	-0.804179	0.271579	-2.96112	0.00306522	0.0262477
ENSG00000176108	CHMP6	protein_coding	396.38	0.416804	0.140794	2.96037	0.00307266	0.0262846
ENSG00000078668	VDAC3	protein_coding	1347.62	0.418765	0.141458	2.96035	0.0030729	0.0262846
ENSG00000136100	VPS36	protein_coding	1181.57	0.445994	0.150673	2.96001	0.00307628	0.026299
ENSG00000155096	AZIN1	protein_coding	4500.99	-0.470673	0.159061	-2.95907	0.00308573	0.0263509
ENSG00000185482	STAC3	protein_coding	891.121	0.3816	0.12896	2.95906	0.00308574	0.0263509
ENSG00000147654	EBAG9	protein_coding	286.863	0.398144	0.134575	2.95853	0.00309111	0.0263822
ENSG00000267244	CTB-31O20.4	processed_transcript	101.57	-0.822832	0.278217	-2.95752	0.00310124	0.0264542
ENSG00000122641	INHBA	protein_coding	27.2736	-0.890969	0.30128	-2.95728	0.0031037	0.0264606
ENSG00000104835	SARS2	protein_coding	11.2332	-0.867126	0.293235	-2.9571	0.00310547	0.0264612
ENSG00000241155	ARHGAP31-AS1	antisense	12.8145	-0.771259	0.260845	-2.95677	0.00310884	0.0264754
ENSG00000012822	CALCOCO1	protein_coding	2112.27	0.216062	0.0731301	2.95449	0.00313191	0.0266494
ENSG00000180979	LRRC57	protein_coding	441.288	-0.430715	0.145787	-2.95441	0.00313271	0.0266495
ENSG00000132286	TIMM10B	protein_coding	441.673	-0.387539	0.131198	-2.95385	0.00313834	0.0266708
ENSG00000124151	NCOA3	protein_coding	2620.7	-0.35821	0.121276	-2.95368	0.00314014	0.0266708
ENSG00000167220	HDHD2	protein_coding	362.934	0.396062	0.134092	2.95365	0.00314037	0.0266708
ENSG00000214176	PLEKHM1P	transcribed_unprocessed_pseudogene	1579.83	-0.734638	0.248748	-2.95334	0.00314352	0.026683
ENSG00000143493	INTS7	protein_coding	220.432	0.389721	0.131994	2.95256	0.00315152	0.0267363
ENSG00000261471	RP11-61F12.1	antisense	16.0026	-0.853832	0.289247	-2.95191	0.00315814	0.0267766
ENSG00000168685	IL7R	protein_coding	90.3275	0.861578	0.291886	2.95176	0.00315971	0.0267766
ENSG00000120733	KDM3B	protein_coding	2508.93	-0.440423	0.149232	-2.95127	0.00316472	0.0268044
ENSG00000143740	SNAP47	protein_coding	272.535	0.364981	0.123729	2.94985	0.00317932	0.0269073
ENSG00000158769	F11R	protein_coding	947.206	0.439474	0.148987	2.94975	0.00318034	0.0269073
ENSG00000140279	DUOX2	protein_coding	9.84401	-0.793356	0.268987	-2.94942	0.00318371	0.0269212
ENSG00000196455	PIK3R4	protein_coding	327.046	0.304085	0.103111	2.94911	0.00318695	0.0269339
ENSG00000261373	VPS9D1-AS1	antisense	27.799	-0.791416	0.26847	-2.94787	0.00319966	0.0270267
ENSG00000242779	ZNF702P	transcribed_processed_pseudogene	35.5361	0.87215	0.295917	2.94728	0.00320581	0.0270639
ENSG00000107372	ZFAND5	protein_coding	12437.3	-0.397313	0.134857	-2.94619	0.00321713	0.0271236
ENSG00000028277	POU2F2	protein_coding	4241.49	0.382581	0.12986	2.94611	0.00321796	0.0271236
ENSG00000178537	SLC25A20	protein_coding	675.298	0.672949	0.228424	2.94605	0.00321856	0.0271236
ENSG00000276107	CTD-2033D15.2	sense_intronic	40.7755	-0.893954	0.303454	-2.94593	0.00321985	0.0271236
ENSG00000253667	RP11-30L15.4	processed_pseudogene	8.73467	-0.88598	0.300777	-2.94563	0.00322295	0.0271349
ENSG00000070476	ZXDC	protein_coding	1161.37	-0.346122	0.117513	-2.9454	0.00322539	0.0271408
ENSG00000008710	PKD1	protein_coding	918.483	-0.407195	0.138268	-2.94497	0.00322983	0.0271527
ENSG00000198898	CAPZA2	protein_coding	6361.33	0.3894	0.132227	2.94493	0.00323031	0.0271527
ENSG00000139624	CERS5	protein_coding	657.225	0.240078	0.0815431	2.94419	0.00323804	0.0271932
ENSG00000081177	EXD2	protein_coding	125.995	0.518256	0.17603	2.94413	0.00323862	0.0271932
ENSG00000146834	MEPCE	protein_coding	1049.23	-0.474818	0.161302	-2.94367	0.00324348	0.0272193
ENSG00000114395	CYB561D2	protein_coding	481.284	0.324933	0.110399	2.94327	0.00324769	0.0272399
ENSG00000173114	LRRN3	protein_coding	2.53563	0.846529	0.287637	2.94304	0.00325003	NA
ENSG00000171502	COL24A1	protein_coding	13.2336	-0.783969	0.266399	-2.94283	0.00325225	0.0272444
ENSG00000279700	RP13-554M15.2	TEC	11.708	-0.867967	0.29496	-2.94266	0.00325406	0.0272444
ENSG00000170185	USP38	protein_coding	1186.64	-0.413296	0.14045	-2.94265	0.00325413	0.0272444
ENSG00000141458	NPC1	protein_coding	611.927	0.325376	0.110576	2.94255	0.00325523	0.0272444
ENSG00000235859	DKFZP586I1420	processed_pseudogene	354.581	-0.623805	0.212021	-2.94219	0.00325899	0.0272499
ENSG00000159079	C21orf59	protein_coding	86.5536	0.452574	0.15383	2.94205	0.00326051	0.0272499
ENSG00000175873	AC004840.9	lincRNA	22.6896	0.625305	0.212545	2.94198	0.00326116	0.0272499
ENSG00000184634	MED12	protein_coding	838.233	0.364091	0.123779	2.94147	0.00326661	0.0272697
ENSG00000167196	FBXO22	protein_coding	169.599	0.437489	0.148734	2.94143	0.00326703	0.0272697
ENSG00000142784	WDTC1	protein_coding	2079.32	0.389203	0.132343	2.94088	0.00327284	0.0273035
ENSG00000108510	MED13	protein_coding	2637.14	-0.347191	0.118077	-2.94037	0.00327816	0.0273333
ENSG00000137393	RNF144B	protein_coding	2493.03	-0.561411	0.190959	-2.93996	0.00328254	0.0273551
ENSG00000158715	SLC45A3	protein_coding	29.9711	-0.83765	0.285021	-2.9389	0.00329377	0.0273969
ENSG00000153898	MCOLN2	protein_coding	23.4018	-0.834768	0.284055	-2.93876	0.00329532	0.0273969
ENSG00000164163	ABCE1	protein_coding	848.891	-0.326826	0.111213	-2.93874	0.00329544	0.0273969
ENSG00000167114	SLC27A4	protein_coding	354.853	0.492846	0.167711	2.93866	0.00329629	0.0273969
ENSG00000232119	MCTS1	protein_coding	464.848	0.434032	0.147703	2.93855	0.00329754	0.0273969
ENSG00000158427	TMSB15B	protein_coding	2.0832	-0.886758	0.301772	-2.9385	0.00329806	NA
ENSG00000012124	CD22	protein_coding	46.5112	0.794343	0.270323	2.93849	0.00329814	0.0273969
ENSG00000185753	CXorf38	protein_coding	1598.44	0.507711	0.17282	2.9378	0.00330549	0.0274433
ENSG00000109654	TRIM2	protein_coding	36.2043	0.666512	0.22689	2.9376	0.00330764	0.0274465
ENSG00000233231	HNRNPA1P49	processed_pseudogene	26.6073	-0.828037	0.281906	-2.93728	0.00331102	0.0274599
ENSG00000133103	COG6	protein_coding	239.464	0.614823	0.20933	2.9371	0.003313	0.0274602
ENSG00000163803	PLB1	protein_coding	882.989	0.410106	0.139655	2.93657	0.00331859	0.0274602
ENSG00000005020	SKAP2	protein_coding	3954.81	0.439462	0.149652	2.93657	0.00331866	0.0274602
ENSG00000008853	RHOBTB2	protein_coding	178.518	0.495422	0.168715	2.93645	0.00331998	0.0274602
ENSG00000260196	RP1-239B22.5	antisense	16.3192	-0.867821	0.295536	-2.93643	0.00332016	0.0274602
ENSG00000179918	SEPHS2	protein_coding	901.341	0.587597	0.200127	2.93612	0.00332342	0.0274602
ENSG00000153933	DGKE	protein_coding	222.177	-0.635639	0.216499	-2.93599	0.0033249	0.0274602
ENSG00000170502	NUDT9	protein_coding	274.499	0.440036	0.149878	2.93596	0.00332519	0.0274602
ENSG00000083896	YTHDC1	protein_coding	1708.73	-0.557136	0.189789	-2.93555	0.00332953	0.0274814
ENSG00000120860	CCDC53	protein_coding	364.315	0.503206	0.1715	2.93414	0.00334471	0.0275921
ENSG00000138794	CASP6	protein_coding	112.707	0.533495	0.181836	2.93394	0.00334689	0.0275955
ENSG00000112640	PPP2R5D	protein_coding	663.479	0.394002	0.134316	2.9334	0.00335267	0.0276284
ENSG00000140632	GLYR1	protein_coding	2479.05	0.277382	0.0945889	2.9325	0.00336241	0.0276803
ENSG00000124177	CHD6	protein_coding	1062.61	-0.370937	0.126493	-2.93248	0.00336268	0.0276803
ENSG00000196935	SRGAP1	protein_coding	33.6202	-0.864426	0.294792	-2.93233	0.00336431	0.0276803
ENSG00000242588	RP11-274B21.1	transcribed_unprocessed_pseudogene	347.517	-0.728018	0.24836	-2.9313	0.00337546	0.0277511
ENSG00000267255	CTB-50L17.5	antisense	1.26275	-0.824376	0.281233	-2.93129	0.00337555	NA
ENSG00000116747	TROVE2	protein_coding	754.429	-0.390853	0.133347	-2.93108	0.00337781	0.0277511
ENSG00000153207	AHCTF1	protein_coding	954.262	-0.787943	0.268827	-2.93104	0.00337827	0.0277511
ENSG00000125633	CCDC93	protein_coding	775.266	-0.501488	0.171122	-2.93058	0.00338328	0.0277775
ENSG00000139826	ABHD13	protein_coding	1615.7	-0.356121	0.121543	-2.93001	0.00338953	0.0278029
ENSG00000143612	C1orf43	protein_coding	3242.26	0.362437	0.1237	2.92997	0.00338994	0.0278029
ENSG00000167037	SGSM1	protein_coding	3.49321	-0.883517	0.301559	-2.92984	0.0033914	NA
ENSG00000115514	TXNDC9	protein_coding	252.801	0.344474	0.117577	2.92977	0.00339208	0.0278058
ENSG00000136240	KDELR2	protein_coding	1254.99	0.409289	0.139716	2.92943	0.00339579	0.0278215
ENSG00000205765	C5orf51	protein_coding	364.293	0.464052	0.158441	2.92887	0.00340198	0.0278424
ENSG00000157978	LDLRAP1	protein_coding	425.911	0.469172	0.160192	2.92881	0.00340264	0.0278424
ENSG00000085514	PILRA	protein_coding	5010.37	0.417222	0.142472	2.92846	0.00340647	0.0278424
ENSG00000116560	SFPQ	protein_coding	6972.15	-0.595141	0.203234	-2.92835	0.00340764	0.0278424
ENSG00000272483	RP11-169K17.3	antisense	9.69665	-0.880303	0.300623	-2.92826	0.00340865	0.0278424
ENSG00000076043	REXO2	protein_coding	103.457	0.395955	0.135223	2.92817	0.00340963	0.0278424
ENSG00000114480	GBE1	protein_coding	574.355	0.322833	0.110265	2.92779	0.00341384	0.0278424
ENSG00000119711	ALDH6A1	protein_coding	182.212	0.474527	0.162077	2.92778	0.00341394	0.0278424
ENSG00000120656	TAF12	protein_coding	613.902	0.474098	0.161939	2.92764	0.00341545	0.0278424
ENSG00000132604	TERF2	protein_coding	332.571	0.279706	0.0955446	2.92749	0.00341706	0.0278424
ENSG00000272760	RP11-5C23.1	antisense	35.486	0.761461	0.260115	2.9274	0.00341805	0.0278424
ENSG00000155393	HEATR3	protein_coding	808.8	-0.532309	0.181858	-2.92706	0.00342182	0.0278489
ENSG00000214846	RP11-115L11.1	processed_pseudogene	18.1641	0.86753	0.296388	2.927	0.00342243	0.0278489
ENSG00000198814	GK	protein_coding	1088.85	0.496432	0.16962	2.92673	0.00342541	0.0278503
ENSG00000142156	COL6A1	protein_coding	6.92412	0.862573	0.294729	2.92666	0.00342619	0.0278503
ENSG00000123643	SLC36A1	protein_coding	889.975	-0.387178	0.132327	-2.92591	0.00343448	0.0279031
ENSG00000152818	UTRN	protein_coding	5176.26	-0.432771	0.147925	-2.92561	0.00343779	0.0279104
ENSG00000175029	CTBP2	protein_coding	1418.94	0.360612	0.123265	2.9255	0.00343897	0.0279104
ENSG00000186767	SPIN4	protein_coding	118.189	-0.623612	0.213194	-2.9251	0.00344349	0.0279325
ENSG00000229931	RP1-151F17.1	antisense	11.437	-0.828969	0.283477	-2.92429	0.00345239	0.0279832
ENSG00000271933	RP11-338I21.1	antisense	46.1469	-0.79253	0.271036	-2.92408	0.00345473	0.0279832
ENSG00000272456	CTD-2342N23.3	lincRNA	0.711407	0.753587	0.257719	2.92407	0.00345486	NA
ENSG00000165732	DDX21	protein_coding	5876.52	-0.695711	0.237934	-2.92396	0.00345608	0.0279832
ENSG00000231177	LINC00852	antisense	51.791	-0.670814	0.229432	-2.9238	0.00345785	0.0279832
ENSG00000243679	RP11-274B21.3	processed_pseudogene	211.253	-0.608729	0.208203	-2.92372	0.00345874	0.0279832
ENSG00000135763	URB2	protein_coding	162.884	-0.380909	0.130311	-2.92308	0.00346584	0.0280136
ENSG00000042445	RETSAT	protein_coding	497.489	0.420843	0.143973	2.92306	0.0034661	0.0280136
ENSG00000263264	CTB-133G6.1	protein_coding	176.969	-0.446864	0.152904	-2.92251	0.00347219	0.0280351
ENSG00000214517	PPME1	protein_coding	177.809	0.335009	0.114636	2.92237	0.00347378	0.0280351
ENSG00000182782	HCAR2	protein_coding	748.943	-0.783946	0.26826	-2.92233	0.00347417	0.0280351
ENSG00000167281	RBFOX3	protein_coding	15.4606	-0.85113	0.291334	-2.92149	0.00348365	0.0280829
ENSG00000164949	GEM	protein_coding	8.703	-0.837763	0.28676	-2.92148	0.00348371	0.0280829
ENSG00000151148	UBE3B	protein_coding	898.15	0.223636	0.0765707	2.92065	0.003493	0.0281219
ENSG00000235316	DUSP8P5	processed_pseudogene	40.5296	-0.734662	0.251545	-2.9206	0.00349356	0.0281219
ENSG00000279901	CTD-2270P14.2	TEC	13.1291	-0.866896	0.296833	-2.92049	0.00349483	0.0281219
ENSG00000070190	DAPP1	protein_coding	1794.81	0.480678	0.164593	2.9204	0.00349579	0.0281219
ENSG00000131473	ACLY	protein_coding	3069.18	0.334461	0.114568	2.91933	0.00350782	0.0282037
ENSG00000167747	C19orf48	protein_coding	202.493	-0.431091	0.147681	-2.91908	0.00351071	0.0282037
ENSG00000129484	PARP2	protein_coding	97.0653	-0.46848	0.160497	-2.91893	0.00351239	0.0282037
ENSG00000044459	CNTLN	protein_coding	549.933	-0.360236	0.123417	-2.91885	0.00351321	0.0282037
ENSG00000105438	KDELR1	protein_coding	1732.62	0.447041	0.153241	2.91725	0.00353132	0.0283344
ENSG00000128294	TPST2	protein_coding	1084.29	0.519524	0.178206	2.91531	0.0035534	0.0284969
ENSG00000105229	PIAS4	protein_coding	352.013	0.326589	0.11205	2.91466	0.00356075	0.0285277
ENSG00000135336	ORC3	protein_coding	266.583	0.449523	0.154229	2.91465	0.00356091	0.0285277
[truncated: 3,829 more rows]

## Sheet: HC_lcSSc
	Gene Name	Gene Type	baseMean	log2FoldChange	lfcSE	stat	pvalue	padj
ENSG00000100335	MIEF1	protein_coding	1002.29	-0.749821	0.110952	-6.7581	1.39817e-11	1.6806e-07
ENSG00000011007	TCEB3	protein_coding	1250.81	-0.524874	0.0875392	-5.99587	2.02395e-09	9.72437e-06
ENSG00000105516	DBP	protein_coding	295.786	-1.11484	0.186857	-5.96629	2.42705e-09	9.72437e-06
ENSG00000188811	NHLRC3	protein_coding	573.206	0.604167	0.104033	5.80747	6.34242e-09	1.9059e-05
ENSG00000170385	SLC30A1	protein_coding	1767.67	-0.741821	0.129793	-5.71543	1.09428e-08	2.63065e-05
ENSG00000172366	FAM195A	protein_coding	441.802	-0.768189	0.135776	-5.65776	1.53359e-08	3.07229e-05
ENSG00000087502	ERGIC2	protein_coding	271.422	0.761706	0.14204	5.36263	8.2017e-08	0.000140835
ENSG00000134321	RSAD2	protein_coding	632.788	1.54378	0.290005	5.32328	1.01914e-07	0.000153125
ENSG00000169018	FEM1B	protein_coding	2156.26	-0.527842	0.10133	-5.20914	1.89717e-07	0.000253378
ENSG00000100811	YY1	protein_coding	3463.72	-0.383213	0.0742011	-5.16452	2.41053e-07	0.000274525
ENSG00000179833	SERTAD2	protein_coding	2969.4	-0.703882	0.136829	-5.14424	2.68605e-07	0.000274525
ENSG00000172409	CLP1	protein_coding	405.409	-0.780431	0.152228	-5.12674	2.94805e-07	0.000274525
ENSG00000162377	COA7	protein_coding	231.404	-0.563704	0.109982	-5.1254	2.96908e-07	0.000274525
ENSG00000170191	NANP	protein_coding	112.286	-0.733368	0.143574	-5.10794	3.25684e-07	0.000279623
ENSG00000153885	KCTD15	protein_coding	765.572	-0.538284	0.106288	-5.06437	4.09748e-07	0.000328345
ENSG00000137959	IFI44L	protein_coding	2340.12	1.52036	0.301215	5.04742	4.47808e-07	0.000334106
ENSG00000110324	IL10RA	protein_coding	18953.3	-0.506469	0.100547	-5.03714	4.72529e-07	0.000334106
ENSG00000141582	CBX4	protein_coding	1690.67	-0.54962	0.110124	-4.99091	6.00957e-07	0.000401306
ENSG00000167074	TEF	protein_coding	110.074	-0.988383	0.204073	-4.84329	1.27709e-06	0.000792456
ENSG00000088827	SIGLEC1	protein_coding	2257.13	1.46188	0.302232	4.83694	1.31856e-06	0.000792456
ENSG00000126351	THRA	protein_coding	475.948	-0.932738	0.194906	-4.78557	1.70499e-06	0.000953178
ENSG00000102870	ZNF629	protein_coding	324.447	-0.710436	0.148597	-4.78096	1.74459e-06	0.000953178
ENSG00000157601	MX1	protein_coding	2743.13	1.31609	0.278175	4.73115	2.23253e-06	0.00114131
ENSG00000135966	TGFBRAP1	protein_coding	1220.03	-0.374761	0.0792813	-4.72698	2.27883e-06	0.00114131
ENSG00000279862	RP11-423E7.2	TEC	1.74217	1.3997	0.299586	4.6721	2.98142e-06	NA
ENSG00000183337	BCOR	protein_coding	886.557	-0.863253	0.184831	-4.67049	3.00483e-06	0.00144472
ENSG00000123933	MXD4	protein_coding	2189.09	-0.471787	0.101831	-4.63303	3.60348e-06	0.001644
ENSG00000171617	ENC1	protein_coding	712.105	-0.799949	0.172851	-4.62796	3.69284e-06	0.001644
ENSG00000104142	VPS18	protein_coding	919.541	-0.532115	0.115389	-4.61149	3.998e-06	0.00166586
ENSG00000101665	SMAD7	protein_coding	372.455	-1.06427	0.230841	-4.61039	4.01913e-06	0.00166586
ENSG00000137965	IFI44	protein_coding	1775.54	1.26137	0.275485	4.57871	4.67848e-06	0.00182529
ENSG00000005302	MSL3	protein_coding	1594.79	0.369477	0.0807173	4.57742	4.70748e-06	0.00182529
ENSG00000189319	FAM53B	protein_coding	2273.6	-0.50475	0.111358	-4.5327	5.82337e-06	0.0021874
ENSG00000119917	IFIT3	protein_coding	1170.66	1.33183	0.294781	4.51804	6.24144e-06	0.00221523
ENSG00000165060	FXN	protein_coding	174.354	-0.537656	0.119024	-4.51721	6.26605e-06	0.00221523
ENSG00000132819	RBM38	protein_coding	802.823	-0.649642	0.144254	-4.50346	6.68549e-06	0.00222787
ENSG00000152804	HHEX	protein_coding	1315.96	-0.714533	0.158849	-4.49819	6.85332e-06	0.00222787
ENSG00000105732	ZNF574	protein_coding	87.231	-0.924435	0.205519	-4.49805	6.85782e-06	0.00222787
ENSG00000241360	PDXP	protein_coding	18.7281	-0.980178	0.21831	-4.48984	7.12766e-06	NA
ENSG00000175213	ZNF408	protein_coding	209.075	-0.743767	0.167324	-4.44506	8.78662e-06	0.0027297
ENSG00000171861	RNMTL1	protein_coding	168.509	-0.418072	0.0940892	-4.44335	8.85677e-06	0.0027297
ENSG00000173457	PPP1R14B	protein_coding	551.34	-0.598766	0.134975	-4.43612	9.15933e-06	0.00275238
ENSG00000180720	CHRM4	protein_coding	24.8443	-0.720532	0.16403	-4.39269	1.11958e-05	0.00322752
ENSG00000198824	CHAMP1	protein_coding	377.53	-0.545052	0.124126	-4.39111	1.12775e-05	0.00322752
ENSG00000226738	CTA-384D8.31	antisense	3.80813	1.30373	0.299219	4.35711	1.31794e-05	NA
ENSG00000126882	FAM78A	protein_coding	1528.05	-0.675665	0.155772	-4.33752	1.44097e-05	0.00390837
ENSG00000167447	SMG8	protein_coding	212.236	-0.803853	0.185353	-4.33688	1.44522e-05	0.00390837
ENSG00000214706	IFRD2	protein_coding	254.232	-0.453285	0.104584	-4.33416	1.4632e-05	0.00390837
ENSG00000084093	REST	protein_coding	1260.83	-0.570691	0.131853	-4.32822	1.50317e-05	0.00392784
ENSG00000153786	ZDHHC7	protein_coding	7122.84	-0.407701	0.0947669	-4.30214	1.69154e-05	0.0043012
ENSG00000166860	ZBTB39	protein_coding	282.431	-0.768323	0.178732	-4.29875	1.71762e-05	0.0043012
ENSG00000174579	MSL2	protein_coding	1494.31	-0.514594	0.120054	-4.28636	1.81629e-05	0.00444225
ENSG00000100105	PATZ1	protein_coding	573.95	-0.466072	0.108831	-4.28252	1.84786e-05	0.00444225
ENSG00000188807	TMEM201	protein_coding	122.394	-0.569845	0.133638	-4.26408	2.00723e-05	0.00473077
ENSG00000175073	VCPIP1	protein_coding	1058.47	-0.56826	0.133513	-4.25622	2.07914e-05	0.00480601
ENSG00000139718	SETD1B	protein_coding	1826.95	-0.51345	0.120869	-4.24797	2.15715e-05	0.00485068
ENSG00000188483	IER5L	protein_coding	157.596	-0.983781	0.231713	-4.24569	2.17917e-05	0.00485068
ENSG00000132388	UBE2G1	protein_coding	1356.17	-0.367822	0.0867648	-4.2393	2.24222e-05	0.00487297
ENSG00000183486	MX2	protein_coding	4187.82	0.987155	0.233055	4.23572	2.27819e-05	0.00487297
ENSG00000124256	ZBP1	protein_coding	239.794	1.0654	0.251717	4.23253	2.31081e-05	0.00487297
ENSG00000182768	NGRN	protein_coding	227.986	-0.431079	0.102033	-4.2249	2.39048e-05	0.00488828
ENSG00000100413	POLR3H	protein_coding	398.477	-0.40914	0.0968595	-4.22406	2.39941e-05	0.00488828
ENSG00000107201	DDX58	protein_coding	759.237	1.01551	0.241987	4.19656	2.71e-05	0.00542903
ENSG00000113460	BRIX1	protein_coding	231.318	-0.538955	0.128893	-4.18143	2.89684e-05	0.00570417
ENSG00000105649	RAB3A	protein_coding	81.0865	-0.921859	0.220652	-4.17789	2.94225e-05	0.00570417
ENSG00000137628	DDX60	protein_coding	766.948	0.993627	0.23821	4.17123	3.02958e-05	0.00577469
ENSG00000166170	BAG5	protein_coding	1283.06	-0.438915	0.105309	-4.16786	3.07471e-05	0.00577469
ENSG00000244486	SCARF2	protein_coding	35.6103	-0.943265	0.226817	-4.15871	3.2005e-05	0.00587497
ENSG00000173011	TADA2B	protein_coding	1739.29	-0.448808	0.107967	-4.15691	3.22585e-05	0.00587497
ENSG00000087269	NOP14	protein_coding	429.91	-0.275419	0.0664614	-4.14404	3.41243e-05	0.00612199
ENSG00000171604	CXXC5	protein_coding	1248.7	-0.937559	0.226862	-4.13272	3.58489e-05	0.00633683
ENSG00000148331	ASB6	protein_coding	509.091	-0.467799	0.113395	-4.12539	3.7011e-05	0.00644742
ENSG00000168389	MFSD2A	protein_coding	287.481	-0.863394	0.20951	-4.12101	3.77221e-05	0.00647743
ENSG00000103264	FBXO31	protein_coding	188.252	-0.671904	0.16333	-4.11378	3.89233e-05	0.00649437
ENSG00000270170	NCBP2-AS2	lincRNA	399.784	-0.526671	0.128269	-4.10597	4.02624e-05	0.00649437
ENSG00000088812	ATRN	protein_coding	1583.61	-0.344016	0.0837868	-4.10585	4.02827e-05	0.00649437
ENSG00000006062	MAP3K14	protein_coding	930.928	-0.501156	0.122202	-4.10104	4.11292e-05	0.00649437
ENSG00000079950	STX7	protein_coding	1993.79	0.627685	0.15306	4.1009	4.11554e-05	0.00649437
ENSG00000168092	PAFAH1B2	protein_coding	1742.79	-0.524	0.127811	-4.09981	4.13482e-05	0.00649437
ENSG00000169926	KLF13	protein_coding	9649.99	-0.477184	0.116432	-4.09839	4.16029e-05	0.00649437
ENSG00000189114	BLOC1S3	protein_coding	245.261	-0.452747	0.110885	-4.08303	4.44515e-05	0.00685009
ENSG00000186665	C17orf58	protein_coding	102.837	-0.566222	0.138851	-4.0779	4.5444e-05	0.00691438
ENSG00000081721	DUSP12	protein_coding	434.915	-0.46851	0.115148	-4.06878	4.72608e-05	0.00710094
ENSG00000110400	PVRL1	protein_coding	397.786	-0.515038	0.126716	-4.0645	4.81352e-05	0.00714302
ENSG00000024862	CCDC28A	protein_coding	422.128	0.486276	0.119934	4.05454	5.0234e-05	0.00736357
ENSG00000184979	USP18	protein_coding	105.946	1.20791	0.298295	4.04939	5.13509e-05	0.00743659
ENSG00000130396	MLLT4	protein_coding	150.542	0.956193	0.237081	4.03319	5.50259e-05	0.00775228
ENSG00000204020	LIPN	protein_coding	376.427	0.755423	0.187374	4.03162	5.53934e-05	0.00775228
ENSG00000026950	BTN3A1	protein_coding	1406.98	0.571155	0.14168	4.0313	5.54686e-05	0.00775228
ENSG00000111880	RNGTT	protein_coding	311.623	0.403264	0.1001	4.0286	5.61105e-05	0.00775228
ENSG00000219545	RPA3OS	protein_coding	276.63	0.467824	0.116499	4.01569	5.92729e-05	0.00802396
ENSG00000126368	NR1D1	protein_coding	107.718	-0.899952	0.22414	-4.01513	5.9412e-05	0.00802396
ENSG00000122687	FTSJ2	protein_coding	457.294	-0.51012	0.127267	-4.00826	6.11685e-05	0.00816939
ENSG00000259623	RP11-156E6.1	sense_overlapping	126.381	-0.674607	0.168806	-3.99634	6.43287e-05	0.00849704
ENSG00000185112	FAM43A	protein_coding	174.359	-0.79613	0.199364	-3.99335	6.51466e-05	0.00851155
ENSG00000151490	PTPRO	protein_coding	207.643	0.945488	0.237246	3.98527	6.74035e-05	0.00871173
ENSG00000136870	ZNF189	protein_coding	114.963	0.580032	0.145894	3.97571	7.01683e-05	0.00895896
ENSG00000198492	YTHDF2	protein_coding	1530.53	-0.394001	0.0991557	-3.97356	7.08071e-05	0.00895896
ENSG00000165240	ATP7A	protein_coding	233.291	0.460271	0.115959	3.96926	7.20974e-05	0.00897143
ENSG00000104412	EMC2	protein_coding	228.692	0.538961	0.135821	3.96818	7.24239e-05	0.00897143
ENSG00000075945	KIFAP3	protein_coding	97.1103	0.441378	0.111323	3.96483	7.34475e-05	0.00897143
ENSG00000144231	POLR2D	protein_coding	364.829	-0.370464	0.0935046	-3.96199	7.43285e-05	0.00897143
ENSG00000105879	CBLL1	protein_coding	559.213	-0.406671	0.102738	-3.95833	7.54766e-05	0.00897143
ENSG00000265808	SEC22B	protein_coding	1333.1	0.414963	0.10497	3.95317	7.71233e-05	0.00897143
ENSG00000175087	PDIK1L	protein_coding	222.84	-0.812602	0.205594	-3.95246	7.73504e-05	0.00897143
ENSG00000211460	TSN	protein_coding	1591.13	-0.320183	0.0810158	-3.95211	7.74646e-05	0.00897143
ENSG00000176749	CDK5R1	protein_coding	106.531	-0.895837	0.226701	-3.95162	7.7623e-05	0.00897143
ENSG00000160570	DEDD2	protein_coding	2366.07	-0.434678	0.110287	-3.94135	8.10241e-05	0.00918368
ENSG00000136147	PHF11	protein_coding	1183.43	0.536118	0.136073	3.93991	8.15108e-05	0.00918368
ENSG00000197601	FAR1	protein_coding	2596.22	0.453498	0.115124	3.93921	8.17515e-05	0.00918368
ENSG00000130204	TOMM40	protein_coding	620.475	-0.407342	0.10355	-3.93377	8.36245e-05	0.00921002
ENSG00000181894	ZNF329	protein_coding	73.4874	-0.734829	0.18692	-3.93124	8.45075e-05	0.00921002
ENSG00000100883	SRP54	protein_coding	664.444	0.367667	0.0935502	3.93016	8.48901e-05	0.00921002
ENSG00000112365	ZBTB24	protein_coding	481.702	-0.443683	0.112913	-3.92941	8.51531e-05	0.00921002
ENSG00000172315	TP53RK	protein_coding	215.511	-0.482828	0.122993	-3.92565	8.64943e-05	0.00921002
ENSG00000135093	USP30	protein_coding	243.989	-0.500488	0.1275	-3.92541	8.65834e-05	0.00921002
ENSG00000138772	ANXA3	protein_coding	32.7085	1.17651	0.300036	3.92122	8.81007e-05	0.00928922
ENSG00000088356	PDRG1	protein_coding	135.185	-0.444958	0.113574	-3.91777	8.93709e-05	0.0093412
ENSG00000167110	GOLGA2	protein_coding	790.685	0.272981	0.0698221	3.90966	9.24267e-05	0.00957732
ENSG00000129422	MTUS1	protein_coding	18.1317	-1.06558	0.273153	-3.90104	9.57818e-05	NA
ENSG00000160993	ALKBH4	protein_coding	136.756	-0.643062	0.164866	-3.9005	9.59936e-05	0.00986191
ENSG00000132274	TRIM22	protein_coding	5967.05	0.713568	0.183167	3.89572	9.79065e-05	0.00997145
ENSG00000166927	MS4A7	protein_coding	4066.66	0.487738	0.125263	3.89372	9.8719e-05	0.00997145
ENSG00000138621	PPCDC	protein_coding	322.14	0.419094	0.107696	3.89144	9.96508e-05	0.00998169
ENSG00000110079	MS4A4A	protein_coding	437.647	0.90929	0.233891	3.88767	0.000101209	0.010054
ENSG00000197696	NMB	protein_coding	15.0316	-0.829163	0.214234	-3.87035	0.000108678	NA
ENSG00000089127	OAS1	protein_coding	2788.57	0.965069	0.249599	3.86647	0.000110422	0.0108217
ENSG00000259330	INAFM2	antisense	551.636	-0.413079	0.106861	-3.86559	0.000110821	0.0108217
ENSG00000062598	ELMO2	protein_coding	1096.17	0.434434	0.112437	3.8638	0.000111638	0.0108217
ENSG00000263465	SRSF8	protein_coding	761.084	-0.493037	0.127689	-3.86122	0.00011282	0.0108488
ENSG00000084090	STARD7	protein_coding	3032.93	-0.338506	0.0877899	-3.85587	0.000115319	0.0110011
ENSG00000139514	SLC7A1	protein_coding	275.146	-0.575094	0.149325	-3.85128	0.000117503	0.0111211
ENSG00000085662	AKR1B1	protein_coding	1025.25	-0.511393	0.132909	-3.84771	0.000119229	0.0111964
ENSG00000171388	APLN	protein_coding	1.25786	-1.1229	0.292	-3.84554	0.000120289	NA
ENSG00000184436	THAP7	protein_coding	265.999	-0.399372	0.103857	-3.8454	0.000120358	0.0112148
ENSG00000160209	PDXK	protein_coding	2064.86	-0.340457	0.0888778	-3.83062	0.000127822	0.0115673
ENSG00000259238	RP11-361D15.2	antisense	15.6137	1.061	0.276985	3.83052	0.000127875	NA
ENSG00000132530	XAF1	protein_coding	679.244	1.00051	0.261255	3.82963	0.000128338	0.0115673
ENSG00000151327	FAM177A1	protein_coding	410.058	0.294157	0.076835	3.82843	0.000128964	0.0115673
ENSG00000214022	REPIN1	protein_coding	1637.16	-0.547792	0.143093	-3.82822	0.000129071	0.0115673
ENSG00000130560	UBAC1	protein_coding	1252.54	-0.331737	0.0866915	-3.82663	0.000129907	0.0115673
ENSG00000275052	SMEK2	protein_coding	1494.03	0.308408	0.0805956	3.82662	0.000129916	0.0115673
ENSG00000128513	POT1	protein_coding	251.853	0.534154	0.139881	3.81863	0.000134197	0.0118606
ENSG00000204519	ZNF551	protein_coding	212.924	-0.708323	0.185844	-3.81138	0.000138193	0.0120501
ENSG00000185745	IFIT1	protein_coding	951.573	1.1542	0.303048	3.80862	0.000139742	0.0120501
ENSG00000128383	APOBEC3A	protein_coding	5277.05	0.919805	0.241541	3.80806	0.00014006	0.0120501
ENSG00000156983	BRPF1	protein_coding	1498.79	-0.59347	0.155867	-3.80755	0.000140351	0.0120501
ENSG00000173930	SLCO4C1	protein_coding	156.168	0.608897	0.160126	3.80262	0.000143176	0.0122055
ENSG00000279561	AL845472.1	pseudogene	11.378	0.897286	0.23617	3.79932	0.000145093	NA
ENSG00000154529	CNTNAP3B	protein_coding	4.77697	1.13584	0.298971	3.79917	0.000145181	NA
ENSG00000247626	MARS2	protein_coding	62.648	-0.760462	0.200404	-3.79464	0.000147857	0.0125157
ENSG00000099875	MKNK2	protein_coding	5292.51	-0.475585	0.125496	-3.78964	0.000150868	0.0126326
ENSG00000141570	CBX8	protein_coding	96.6879	-0.646044	0.170511	-3.78886	0.000151339	0.0126326
ENSG00000237732	AC010980.2	transcribed_unprocessed_pseudogene	4.66229	1.03306	0.27314	3.78217	0.000155465	NA
ENSG00000138642	HERC6	protein_coding	309.347	0.90261	0.238811	3.7796	0.000157079	0.0130213
ENSG00000181472	ZBTB2	protein_coding	762.637	-0.35914	0.0951842	-3.7731	0.00016123	0.0131332
ENSG00000004961	HCCS	protein_coding	403.996	0.318918	0.0845463	3.77211	0.000161873	0.0131332
ENSG00000137834	SMAD6	protein_coding	36.2975	-0.956711	0.253704	-3.77098	0.000162609	0.0131332
ENSG00000165271	NOL6	protein_coding	644.616	-0.415431	0.110181	-3.77044	0.000162959	0.0131332
ENSG00000239672	NME1	protein_coding	59.9469	-0.633237	0.168015	-3.76893	0.000163952	0.0131332
ENSG00000114737	CISH	protein_coding	171.468	-0.598115	0.158816	-3.76609	0.000165827	0.0131332
ENSG00000272512	RP11-54O7.17	lincRNA	5.72735	1.14189	0.303256	3.76542	0.000166273	NA
ENSG00000187147	RNF220	protein_coding	1092.61	-0.259115	0.0688287	-3.76464	0.000166791	0.0131332
ENSG00000121864	ZNF639	protein_coding	771.963	-0.372092	0.0988536	-3.76407	0.000167169	0.0131332
ENSG00000116871	MAP7D1	protein_coding	4131.74	-0.441031	0.117369	-3.75764	0.000171523	0.0133165
ENSG00000128654	MTX2	protein_coding	137.476	0.468081	0.12461	3.75636	0.000172403	0.0133165
ENSG00000173545	ZNF622	protein_coding	561.111	-0.409947	0.109152	-3.75575	0.000172826	0.0133165
ENSG00000164284	GRPEL2	protein_coding	123.911	-0.679379	0.181022	-3.75303	0.000174713	0.0133239
ENSG00000156735	BAG4	protein_coding	518.844	-0.540713	0.144097	-3.75242	0.000175139	0.0133239
ENSG00000167671	UBXN6	protein_coding	1684.84	-0.401388	0.10713	-3.74675	0.000179141	0.0135002
ENSG00000198648	STK39	protein_coding	289.471	0.428067	0.114274	3.74596	0.000179704	0.0135002
ENSG00000267534	S1PR2	protein_coding	13.8144	-0.838937	0.224086	-3.74382	0.000181247	NA
ENSG00000134030	CTIF	protein_coding	712.227	-0.415049	0.110974	-3.74005	0.000183982	0.0137358
ENSG00000144840	RABL3	protein_coding	251.316	0.355064	0.0949787	3.73835	0.00018523	0.0137436
ENSG00000279117	CTD-2562J17.6	TEC	533.878	-0.408742	0.109413	-3.73578	0.000187134	0.0137991
ENSG00000144485	HES6	protein_coding	58.4949	-0.53708	0.143825	-3.73425	0.000188274	0.0137991
ENSG00000276045	ORAI1	protein_coding	1037.87	-0.527449	0.141737	-3.72131	0.00019819	0.0142634
ENSG00000127554	GFER	protein_coding	189.391	-0.379441	0.102053	-3.71808	0.000200746	0.0142634
ENSG00000071655	MBD3	protein_coding	543.871	-0.408958	0.109993	-3.71803	0.000200779	0.0142634
ENSG00000100426	ZBED4	protein_coding	935.24	-0.347346	0.0934268	-3.71784	0.000200931	0.0142634
ENSG00000232815	RP11-764K9.2	unprocessed_pseudogene	55.9103	0.876283	0.235806	3.71611	0.00020231	0.0142634
ENSG00000111731	C2CD5	protein_coding	856.061	0.499259	0.134464	3.71295	0.00020486	0.0142634
ENSG00000101193	GID8	protein_coding	1667.8	-0.38965	0.104952	-3.71264	0.000205111	0.0142634
ENSG00000104043	ATP8B4	protein_coding	512.843	0.472441	0.127253	3.71261	0.000205137	0.0142634
ENSG00000091127	PUS7	protein_coding	61.5856	-0.625239	0.168418	-3.71242	0.000205289	0.0142634
ENSG00000274605	RP11-12G12.7	lincRNA	9.3932	-0.89425	0.24143	-3.70397	0.000212249	NA
ENSG00000125484	GTF3C4	protein_coding	544.602	-0.374803	0.101195	-3.70377	0.00021242	0.0146741
ENSG00000127334	DYRK2	protein_coding	707.415	-0.413163	0.111604	-3.70204	0.000213877	0.0146903
ENSG00000276174	RP11-687E1.2	sense_intronic	1.45852	1.08922	0.294403	3.69977	0.000215794	NA
ENSG00000166133	RPUSD2	protein_coding	69.6488	-0.650674	0.175993	-3.69716	0.000218027	0.0147899
ENSG00000252103	RNU6-917P	snRNA	13.4386	0.820161	0.221982	3.69472	0.000220133	NA
ENSG00000107362	ABHD17B	protein_coding	354.289	-0.473834	0.128266	-3.69416	0.000220617	0.0147899
ENSG00000156853	ZNF689	protein_coding	224.488	-0.447396	0.121131	-3.6935	0.00022119	0.0147899
ENSG00000178502	KLHL11	protein_coding	82.6686	-0.760695	0.205966	-3.6933	0.000221364	0.0147899
ENSG00000137414	FAM8A1	protein_coding	874.728	0.458322	0.124142	3.69192	0.000222568	0.0147899
ENSG00000135686	KLHL36	protein_coding	941.305	-0.407456	0.110437	-3.6895	0.000224699	0.0147899
ENSG00000133106	EPSTI1	protein_coding	2066.21	1.01192	0.274292	3.68921	0.000224953	0.0147899
ENSG00000038210	PI4K2B	protein_coding	446.702	0.458139	0.124265	3.68679	0.000227103	0.0147899
ENSG00000108826	MRPL27	protein_coding	279.565	0.392395	0.106503	3.68436	0.000229275	0.0147899
ENSG00000186529	CYP4F3	protein_coding	82.1972	0.899074	0.244068	3.6837	0.000229873	0.0147899
ENSG00000117859	OSBPL9	protein_coding	1045.86	0.242464	0.0658251	3.68346	0.000230085	0.0147899
ENSG00000137198	GMPR	protein_coding	113.876	1.0501	0.285086	3.68346	0.000230093	0.0147899
ENSG00000168496	FEN1	protein_coding	128.454	-0.368439	0.100179	-3.67782	0.00023524	0.0150404
ENSG00000154429	CCSAP	protein_coding	832.841	-0.421334	0.114785	-3.67065	0.000241934	0.0153634
ENSG00000111335	OAS2	protein_coding	4806.21	0.984553	0.268357	3.66882	0.000243675	0.0153634
ENSG00000177732	SOX12	protein_coding	49.0185	-0.637689	0.173847	-3.6681	0.00024436	0.0153634
ENSG00000186815	TPCN1	protein_coding	3175.72	-0.372354	0.101542	-3.66701	0.000245406	0.0153634
ENSG00000088035	ALG6	protein_coding	252.754	0.430048	0.117367	3.66412	0.000248188	0.0154571
ENSG00000198919	DZIP3	protein_coding	80.3639	0.504133	0.137651	3.66241	0.000249853	0.0154806
ENSG00000111252	SH2B3	protein_coding	7699.14	-0.562006	0.153557	-3.65992	0.000252289	0.0155439
ENSG00000153487	ING1	protein_coding	1251.14	-0.498379	0.136216	-3.65874	0.000253461	0.0155439
ENSG00000115919	KYNU	protein_coding	1893.34	0.519654	0.142118	3.65648	0.000255698	0.0156015
ENSG00000165949	IFI27	protein_coding	28.7491	1.08199	0.296464	3.64966	0.000262586	0.0159408
ENSG00000278869	CITF22-49E9.3	lincRNA	19.8399	0.815468	0.22363	3.6465	0.000265832	NA
ENSG00000173456	RNF26	protein_coding	383.781	-0.499331	0.137074	-3.64279	0.000269697	0.0162902
ENSG00000165804	ZNF219	protein_coding	156.682	-0.646087	0.17745	-3.64096	0.000271619	0.0163243
ENSG00000169710	FASN	protein_coding	593.08	-0.614101	0.168833	-3.63732	0.000275485	0.0164527
ENSG00000104325	DECR1	protein_coding	1491.52	0.401993	0.110577	3.63541	0.000277535	0.0164527
ENSG00000206337	HCP5	sense_overlapping	490.231	0.481736	0.132546	3.63449	0.000278531	0.0164527
ENSG00000020426	MNAT1	protein_coding	45.7647	0.503122	0.138454	3.63384	0.000279231	0.0164527
ENSG00000240849	TMEM189	protein_coding	544.445	-0.418748	0.115294	-3.63199	0.000281241	0.0164903
ENSG00000126262	FFAR2	protein_coding	715.783	1.01895	0.280908	3.62733	0.000286367	0.0165837
ENSG00000134326	CMPK2	protein_coding	1209.21	1.01771	0.280606	3.62683	0.000286925	0.0165837
ENSG00000136108	CKAP2	protein_coding	512.979	-0.469095	0.129342	-3.62678	0.000286972	0.0165837
ENSG00000109270	LAMTOR3	protein_coding	882.248	0.343976	0.0949033	3.62449	0.000289535	0.0166176
ENSG00000104221	BRF2	protein_coding	65.2631	-0.641363	0.176987	-3.62378	0.000290324	0.0166176
ENSG00000178307	TMEM11	protein_coding	383.536	-0.447798	0.123832	-3.61618	0.00029898	0.017032
ENSG00000166716	ZNF592	protein_coding	2523.5	-0.279619	0.0775603	-3.60518	0.000311933	0.017686
ENSG00000127870	RNF6	protein_coding	988.906	-0.397612	0.110375	-3.60236	0.00031534	0.0177952
ENSG00000063438	AHRR	protein_coding	58.1781	1.04076	0.289547	3.59446	0.00032507	0.0181922
ENSG00000142444	C19orf52	protein_coding	181.978	-0.426397	0.118661	-3.59342	0.000326367	0.0181922
ENSG00000141026	MED9	protein_coding	243.792	-0.423134	0.117767	-3.59298	0.000326915	0.0181922
ENSG00000099958	DERL3	protein_coding	34.6223	-1.02614	0.285727	-3.59135	0.000328969	0.0182221
ENSG00000157551	KCNJ15	protein_coding	234.193	0.79734	0.222363	3.58576	0.000336093	0.0185314
ENSG00000165424	ZCCHC24	protein_coding	375.983	-0.536264	0.15	-3.5751	0.000350093	0.0191367
ENSG00000107614	TRDMT1	protein_coding	193.61	0.449638	0.125774	3.57498	0.000350255	0.0191367
ENSG00000128203	ASPHD2	protein_coding	225.04	-0.589351	0.164952	-3.57287	0.00035309	0.0191925
ENSG00000171150	SOCS5	protein_coding	428.361	-0.370192	0.103641	-3.57185	0.00035447	0.0191925
ENSG00000236609	ZNF853	protein_coding	11.1736	-0.780309	0.218847	-3.56554	0.000363102	NA
ENSG00000164187	LMBRD2	protein_coding	334.862	0.425618	0.119511	3.56132	0.000368999	0.0198895
ENSG00000148296	SURF6	protein_coding	317.176	-0.452267	0.127146	-3.55705	0.000375036	0.0201186
ENSG00000118308	LRMP	protein_coding	1174.62	0.347988	0.0978639	3.55584	0.000376774	0.0201186
ENSG00000138381	ASNSD1	protein_coding	586.473	-0.350787	0.0987017	-3.55401	0.000379403	0.0201186
ENSG00000189369	GSPT2	protein_coding	56.1266	-0.707708	0.19915	-3.55364	0.000379944	0.0201186
ENSG00000226891	LINC01359	lincRNA	2.28103	1.06939	0.301098	3.55164	0.000382838	NA
ENSG00000231233	CCDC147-AS1	antisense	11.255	0.938809	0.264988	3.54284	0.000395841	NA
ENSG00000183044	ABAT	protein_coding	435.391	0.381477	0.107823	3.538	0.000403168	0.0212011
ENSG00000196756	SNHG17	processed_transcript	271.021	-0.588869	0.166464	-3.53751	0.000403915	0.0212011
ENSG00000137200	CMTR1	protein_coding	1238.7	0.485258	0.137385	3.53211	0.00041226	0.0214772
ENSG00000116649	SRM	protein_coding	477.093	-0.528842	0.149738	-3.5318	0.000412748	0.0214772
ENSG00000139725	RHOF	protein_coding	50.428	-0.629345	0.178433	-3.52706	0.000420198	0.0217706
ENSG00000104635	SLC39A14	protein_coding	24.2555	-0.586966	0.166803	-3.51893	0.000433296	0.0222798
ENSG00000117475	BLZF1	protein_coding	219.135	0.554319	0.157552	3.51833	0.000434268	0.0222798
ENSG00000137040	RANBP6	protein_coding	771.576	-0.527512	0.149967	-3.51753	0.000435587	0.0222798
ENSG00000214872	SMTNL1	protein_coding	23.2836	0.938847	0.267148	3.51434	0.000440853	NA
ENSG00000116128	BCL9	protein_coding	179.198	-0.565018	0.160922	-3.51112	0.000446218	0.0227256
ENSG00000109572	CLCN3	protein_coding	739.837	0.462729	0.131831	3.51001	0.000448083	0.0227256
ENSG00000218891	ZNF579	protein_coding	110.266	-0.547165	0.156119	-3.50479	0.000456964	0.0229474
ENSG00000118961	C2orf43	protein_coding	105.051	0.494065	0.140982	3.50446	0.000457537	0.0229474
ENSG00000146112	PPP1R18	protein_coding	5754.21	-0.363125	0.103629	-3.50408	0.000458185	0.0229474
ENSG00000117751	PPP1R8	protein_coding	630.433	-0.292152	0.0834015	-3.50296	0.000460125	0.022949
ENSG00000236137	RP11-27K13.3	antisense	14.3471	0.733215	0.209361	3.50215	0.000461522	NA
ENSG00000186918	ZNF395	protein_coding	621.672	-0.485533	0.1387	-3.5006	0.00046421	0.0230163
ENSG00000172123	SLFN12	protein_coding	372.566	0.524704	0.149944	3.49934	0.000466405	0.0230163
ENSG00000196352	CD55	protein_coding	5593.22	0.616406	0.176173	3.49888	0.00046722	0.0230163
ENSG00000246067	RAB30-AS1	lincRNA	41.6332	0.591241	0.169057	3.49728	0.000470022	0.0230599
ENSG00000211651	IGLV1-44	IG_V_gene	3.41746	1.02487	0.29334	3.49379	0.000476217	NA
ENSG00000075618	FSCN1	protein_coding	288.36	-0.676511	0.193761	-3.49147	0.000480375	0.0234498
ENSG00000262814	MRPL12	protein_coding	46.6625	-0.549629	0.157495	-3.48982	0.000483347	0.0234498
ENSG00000145868	FBXO38	protein_coding	591.227	0.559793	0.160419	3.48956	0.000483824	0.0234498
ENSG00000110435	PDHX	protein_coding	358.763	0.456919	0.131054	3.48648	0.000489419	0.0235596
ENSG00000099381	SETD1A	protein_coding	1153.43	-0.579308	0.166174	-3.48616	0.000490008	0.0235596
ENSG00000107738	C10orf54	protein_coding	28163.6	-0.44591	0.128339	-3.47447	0.000511855	0.0245119
ENSG00000092108	SCFD1	protein_coding	760.785	0.359542	0.103544	3.47234	0.00051594	0.0246095
ENSG00000113303	BTNL8	protein_coding	13.4039	1.05034	0.302513	3.47204	0.000516523	NA
ENSG00000130772	MED18	protein_coding	85.2219	-0.39279	0.11318	-3.47049	0.000519501	0.0246814
ENSG00000231607	DLEU2	antisense	87.6415	0.515038	0.148592	3.46612	0.000528033	0.0247444
ENSG00000185669	SNAI3	protein_coding	168.719	-0.716299	0.206697	-3.46545	0.000529341	0.0247444
ENSG00000125657	TNFSF9	protein_coding	85.3757	-0.771056	0.222576	-3.46423	0.000531746	0.0247444
ENSG00000099942	CRKL	protein_coding	1992.26	-0.348004	0.100474	-3.46362	0.000532959	0.0247444
ENSG00000069712	KIAA1107	protein_coding	46.8344	0.758802	0.219084	3.46352	0.000533155	0.0247444
ENSG00000138138	ATAD1	protein_coding	362.895	0.393568	0.113633	3.46351	0.000533178	0.0247444
ENSG00000228318	AP001610.5	antisense	7.4631	1.04986	0.303268	3.46181	0.000536563	NA
ENSG00000107719	PALD1	protein_coding	15.6615	-0.866097	0.250315	-3.46002	0.000540128	NA
ENSG00000277511	CTD-2095E4.5	lincRNA	21.1049	0.919001	0.265915	3.45599	0.000548272	NA
ENSG00000177409	SAMD9L	protein_coding	2242.29	0.932264	0.269817	3.45517	0.000549942	0.0254242
ENSG00000100647	KIAA0247	protein_coding	4334.37	-0.442035	0.128026	-3.45269	0.000555026	0.0254899
ENSG00000211455	STK38L	protein_coding	1231.25	0.339559	0.0983542	3.45241	0.000555604	0.0254899
ENSG00000272812	RP5-855D21.3	sense_intronic	8.63646	0.841146	0.243946	3.44809	0.000564571	NA
ENSG00000169379	ARL13B	protein_coding	108.177	0.459853	0.133437	3.44621	0.000568504	0.0257601
ENSG00000143493	INTS7	protein_coding	220.432	0.410327	0.119077	3.4459	0.000569166	0.0257601
ENSG00000108819	PPP1R9B	protein_coding	5611.23	-0.416358	0.120839	-3.44557	0.000569854	0.0257601
ENSG00000198380	GFPT1	protein_coding	513.711	-0.3856	0.111936	-3.44482	0.00057144	0.0257601
ENSG00000154310	TNIK	protein_coding	61.5142	0.548919	0.159363	3.44446	0.000572208	0.0257601
ENSG00000172432	GTPBP2	protein_coding	1460.87	0.442979	0.12868	3.44248	0.000576413	0.0258525
ENSG00000235299	MRPL53P1	processed_pseudogene	1.96689	1.03856	0.302336	3.43512	0.000592301	NA
ENSG00000148057	IDNK	protein_coding	75.4571	0.47026	0.13692	3.43457	0.000593493	0.0265196
ENSG00000128512	DOCK4	protein_coding	185.237	0.521253	0.151888	3.43183	0.00059953	0.0266902
ENSG00000172183	ISG20	protein_coding	293.64	0.756106	0.220411	3.43043	0.000602624	0.0267289
ENSG00000182400	TRAPPC6B	protein_coding	253.862	0.528606	0.154204	3.42796	0.000608131	0.026874
ENSG00000143179	UCK2	protein_coding	194.586	-0.437276	0.127685	-3.42464	0.00061562	0.0271053
ENSG00000184207	PGP	protein_coding	642.123	-0.386441	0.113097	-3.41689	0.000633406	0.0276202
ENSG00000006652	IFRD1	protein_coding	1242.11	0.678767	0.198651	3.41688	0.000633426	0.0276202
ENSG00000096063	SRPK1	protein_coding	429.323	0.314134	0.0919449	3.41655	0.000634208	0.0276202
ENSG00000124107	SLPI	protein_coding	16.2644	1.02174	0.299098	3.41607	0.000635313	NA
ENSG00000117318	ID3	protein_coding	38.6868	-0.810102	0.237426	-3.41202	0.000644833	0.0279815
ENSG00000103495	MAZ	protein_coding	424.777	-0.397528	0.116658	-3.40763	0.000655301	0.0283335
ENSG00000170006	TMEM154	protein_coding	3135.98	0.419265	0.123128	3.40511	0.000661376	0.0284897
ENSG00000169083	AR	protein_coding	2.50791	-1.03163	0.303008	-3.40462	0.000662569	NA
ENSG00000004700	RECQL	protein_coding	560.559	0.373079	0.109595	3.40417	0.000663654	0.0284897
ENSG00000123297	TSFM	protein_coding	135.963	-0.427068	0.125656	-3.39871	0.000677038	0.0289608
ENSG00000130479	MAP1S	protein_coding	603.741	-0.64232	0.189311	-3.39293	0.000691486	0.029474
ENSG00000090971	NAT14	protein_coding	56.8772	-0.605912	0.178662	-3.39139	0.000695388	0.0295356
ENSG00000119878	CRIPT	protein_coding	177.202	0.4993	0.147303	3.38962	0.000699897	0.0296224
ENSG00000279908	RP11-325I22.3	TEC	12.2584	-0.718342	0.211982	-3.38869	0.000702264	NA
ENSG00000158691	ZSCAN12	protein_coding	92.2012	-0.59475	0.175631	-3.38636	0.000708256	0.029871
ENSG00000033100	CHPF2	protein_coding	1944.69	-0.333808	0.0986718	-3.38302	0.000716945	0.0301318
ENSG00000239213	NCK1-AS1	antisense	20.1153	0.700034	0.207287	3.37713	0.000732469	NA
ENSG00000272632	RP11-362F19.3	lincRNA	56.1546	0.687712	0.20398	3.37147	0.000747682	0.0312758
ENSG00000277369	RP11-486I11.2	lincRNA	25.231	0.778949	0.231157	3.36979	0.000752268	0.0312758
ENSG00000069943	PIGB	protein_coding	220.102	0.448475	0.133096	3.36956	0.000752885	0.0312758
ENSG00000165410	CFL2	protein_coding	174.51	-0.788259	0.233978	-3.36894	0.000754574	0.0312758
ENSG00000163536	SERPINI1	protein_coding	10.2016	0.829273	0.246408	3.36545	0.00076419	NA
ENSG00000138646	HERC5	protein_coding	678.308	0.974261	0.289869	3.36104	0.000776487	0.0318803
ENSG00000198455	ZXDB	protein_coding	285.104	-0.500972	0.149065	-3.36076	0.000777283	0.0318803
ENSG00000165912	PACSIN3	protein_coding	2.25449	-1.01623	0.302443	-3.36007	0.000779239	NA
ENSG00000126804	ZBTB1	protein_coding	1666.96	-0.375904	0.111894	-3.35945	0.000780969	0.0318803
ENSG00000102401	ARMCX3	protein_coding	267.183	0.506363	0.150765	3.35861	0.000783344	0.0318803
ENSG00000198909	MAP3K3	protein_coding	6455.01	-0.265153	0.0789714	-3.35758	0.000786267	0.0318803
ENSG00000181381	DDX60L	protein_coding	2688.39	0.696094	0.207332	3.35739	0.000786807	0.0318803
ENSG00000185507	IRF7	protein_coding	2134.04	0.771362	0.229772	3.35707	0.000787725	0.0318803
ENSG00000101138	CSTF1	protein_coding	190.201	-0.383275	0.114212	-3.35581	0.000791319	0.0319183
ENSG00000184787	UBE2G2	protein_coding	2471.14	-0.247941	0.0739219	-3.35409	0.000796267	0.0320105
ENSG00000136874	STX17	protein_coding	297.153	0.350577	0.104616	3.35107	0.000804998	0.0321272
ENSG00000109046	WSB1	protein_coding	3243.6	0.565609	0.168799	3.35078	0.000805832	0.0321272
ENSG00000187608	ISG15	protein_coding	1507.65	0.998058	0.2979	3.35032	0.00080719	0.0321272
ENSG00000162747	FCGR3B	protein_coding	844.859	1.01158	0.302157	3.34787	0.000814354	0.0322379
ENSG00000070731	ST6GALNAC2	protein_coding	224.363	0.607767	0.181557	3.34754	0.000815334	0.0322379
ENSG00000173214	KIAA1919	protein_coding	117.083	0.365908	0.109349	3.34623	0.00081918	0.0322693
ENSG00000185019	UBOX5	protein_coding	198.434	-0.352132	0.105257	-3.34545	0.000821498	0.0322693
ENSG00000120254	MTHFD1L	protein_coding	54.3173	-0.556057	0.16632	-3.3433	0.000827885	0.0322823
ENSG00000196227	FAM217B	protein_coding	497.477	-0.476205	0.142495	-3.34192	0.00083202	0.0322823
ENSG00000138496	PARP9	protein_coding	2475.48	0.788107	0.235862	3.34138	0.000833616	0.0322823
ENSG00000175727	MLXIP	protein_coding	3136.7	-0.365844	0.109502	-3.34099	0.000834799	0.0322823
ENSG00000148229	POLE3	protein_coding	1435.89	-0.274118	0.0820506	-3.34084	0.000835258	0.0322823
ENSG00000135828	RNASEL	protein_coding	308.112	0.645294	0.19337	3.33709	0.000846595	0.0326156
ENSG00000140931	CMTM3	protein_coding	3338.39	-0.432944	0.129794	-3.33564	0.000851047	0.0326233
ENSG00000219565	ZNF259P1	transcribed_processed_pseudogene	0.72282	0.898477	0.269426	3.33478	0.000853676	NA
ENSG00000135114	OASL	protein_coding	954.976	0.983846	0.295113	3.33379	0.000856699	0.0326233
ENSG00000104320	NBN	protein_coding	1374.41	0.284193	0.0852544	3.33347	0.000857709	0.0326233
ENSG00000186660	ZFP91	protein_coding	1966.54	-0.386963	0.116089	-3.33333	0.000858139	0.0326233
ENSG00000107833	NPM3	protein_coding	75.097	-0.511444	0.153467	-3.33261	0.000860366	0.0326233
ENSG00000106714	CNTNAP3	protein_coding	19.278	1.00297	0.30101	3.33202	0.000862181	NA
ENSG00000134602	MST4	protein_coding	1029.69	0.301449	0.0905572	3.32882	0.000872138	0.0329657
ENSG00000135899	SP110	protein_coding	1882.75	0.549183	0.165047	3.32743	0.000876517	0.0330243
ENSG00000136444	RSAD1	protein_coding	646.566	-0.305166	0.0917806	-3.32495	0.000884351	0.0330243
ENSG00000205413	SAMD9	protein_coding	1161.85	0.780216	0.234666	3.32479	0.000884853	0.0330243
ENSG00000180901	KCTD2	protein_coding	735.78	-0.26156	0.0786861	-3.32409	0.000887062	0.0330243
ENSG00000174177	CTU2	protein_coding	111.928	-0.468573	0.140967	-3.32398	0.000887424	0.0330243
ENSG00000004399	PLXND1	protein_coding	6020.44	-0.446584	0.134437	-3.32189	0.000894108	0.0331703
ENSG00000080822	CLDND1	protein_coding	539.186	0.349787	0.105365	3.31976	0.000900959	0.0332587
ENSG00000198841	KTI12	protein_coding	212.281	-0.447959	0.134951	-3.31943	0.000902026	0.0332587
ENSG00000135900	MRPL44	protein_coding	507.113	-0.408093	0.123074	-3.31585	0.000913652	0.0335844
ENSG00000197562	RAB40C	protein_coding	667.303	-0.410147	0.123845	-3.31179	0.000927016	0.0338731
ENSG00000108387	SEPT4	protein_coding	48.9874	0.725439	0.219084	3.31123	0.000928853	0.0338731
ENSG00000185404	SP140L	protein_coding	597.689	0.37933	0.11457	3.3109	0.00092996	0.0338731
ENSG00000135916	ITM2C	protein_coding	242.327	-0.817888	0.247134	-3.3095	0.000934636	0.0339406
ENSG00000124383	MPHOSPH10	protein_coding	490.519	-0.394597	0.119322	-3.30698	0.000943088	0.0340985
ENSG00000174032	SLC25A30	protein_coding	443.273	-0.40533	0.122586	-3.30651	0.00094466	0.0340985
ENSG00000124766	SOX4	protein_coding	984.993	-0.609939	0.184603	-3.30406	0.000952952	0.0342292
ENSG00000081019	RSBN1	protein_coding	557.655	-0.38057	0.115214	-3.30315	0.000956065	0.0342292
ENSG00000119599	DCAF4	protein_coding	67.1136	-0.662329	0.20062	-3.30141	0.000962012	0.0342292
ENSG00000170185	USP38	protein_coding	1186.64	-0.418332	0.126723	-3.30115	0.000962898	0.0342292
ENSG00000248810	RP11-362F19.1	lincRNA	299.237	0.889101	0.269349	3.30093	0.000963649	0.0342292
ENSG00000175970	UNC119B	protein_coding	179.407	-0.546625	0.165636	-3.30017	0.000966272	0.0342292
ENSG00000229124	VIM-AS1	antisense	399.102	0.507638	0.153848	3.2996	0.000968213	0.0342292
ENSG00000225886	RP11-288L9.4	antisense	16.926	1.00151	0.303602	3.29876	0.000971146	NA
ENSG00000120942	UBIAD1	protein_coding	329.044	-0.312684	0.0949093	-3.29456	0.000985771	0.034658
ENSG00000123444	KBTBD4	protein_coding	81.9644	-0.466336	0.141553	-3.29441	0.000986277	0.034658
ENSG00000196873	CBWD3	protein_coding	66.4439	0.751722	0.228234	3.29364	0.000988994	0.034658
ENSG00000128228	SDF2L1	protein_coding	295.079	-0.5364	0.162919	-3.29243	0.000993257	0.0347062
ENSG00000196498	NCOR2	protein_coding	5896	-0.484746	0.147445	-3.28765	0.00101027	0.0351983
ENSG00000242324	RP4-576H24.2	unprocessed_pseudogene	42.736	0.599812	0.18264	3.28412	0.001023	0.0355389
ENSG00000143772	ITPKB	protein_coding	1262.79	-0.299596	0.0912812	-3.28212	0.00103031	0.035548
ENSG00000204564	C6orf136	protein_coding	145.81	-0.377688	0.115164	-3.27956	0.00103967	0.035548
ENSG00000167600	CYP2S1	protein_coding	355.706	-0.680305	0.207454	-3.2793	0.00104063	0.035548
ENSG00000035720	STAP1	protein_coding	9.8551	0.982496	0.29962	3.27914	0.00104123	NA
ENSG00000116584	ARHGEF2	protein_coding	3586.16	-0.361332	0.110218	-3.27835	0.00104415	0.035548
ENSG00000196372	ASB13	protein_coding	642.105	-0.470897	0.143654	-3.27799	0.00104551	0.035548
ENSG00000126709	IFI6	protein_coding	3288.04	0.970597	0.296191	3.27693	0.00104942	0.035548
ENSG00000131979	GCH1	protein_coding	2010.15	0.498491	0.152132	3.2767	0.00105028	0.035548
ENSG00000119922	IFIT2	protein_coding	1378.75	0.954427	0.291285	3.27661	0.00105063	0.035548
ENSG00000196642	RABL6	protein_coding	1499.71	-0.3443	0.105088	-3.27631	0.00105173	0.035548
ENSG00000272091	RP4-758J24.5	lincRNA	78.9544	-0.46357	0.14154	-3.27519	0.00105592	0.035548
ENSG00000020181	GPR124	protein_coding	447.046	-0.580235	0.177173	-3.27496	0.00105676	0.035548
ENSG00000162302	RPS6KA4	protein_coding	3654.06	-0.420473	0.128411	-3.27443	0.00105875	0.035548
ENSG00000196363	WDR5	protein_coding	631.136	-0.279188	0.0853337	-3.27172	0.00106894	0.0357902
ENSG00000136197	C7orf25	protein_coding	2.25236	0.978648	0.299404	3.26866	0.00108059	NA
ENSG00000185885	IFITM1	protein_coding	272.445	0.981267	0.300452	3.26597	0.0010909	0.0364239
ENSG00000025800	KPNA6	protein_coding	924.164	-0.333216	0.102177	-3.26117	0.00110952	0.036943
ENSG00000138031	ADCY3	protein_coding	108.42	-0.763131	0.234074	-3.26021	0.00111331	0.0369668
ENSG00000104133	SPG11	protein_coding	2580.42	0.366616	0.11251	3.25852	0.00111994	0.0370845
ENSG00000104081	BMF	protein_coding	1627.35	-0.437685	0.134459	-3.25516	0.00113327	0.0374229
ENSG00000167394	ZNF668	protein_coding	126.099	-0.537224	0.165087	-3.25419	0.00113718	0.0374491
ENSG00000173598	NUDT4	protein_coding	2051.48	-0.3045	0.0936718	-3.25071	0.00115118	0.0377095
ENSG00000197037	ZSCAN25	protein_coding	444.265	-0.388618	0.11955	-3.25066	0.00115136	0.0377095
ENSG00000112078	KCTD20	protein_coding	4345.07	-0.371142	0.114309	-3.24685	0.00116691	0.0381148
ENSG00000155330	C16orf87	protein_coding	410.295	-0.514762	0.158593	-3.24581	0.00117119	0.0381508
ENSG00000171823	FBXL14	protein_coding	378.944	-0.459647	0.141751	-3.24263	0.00118432	0.0384743
ENSG00000132356	PRKAA1	protein_coding	1571.63	0.195563	0.0603531	3.24031	0.00119401	0.0386846
ENSG00000179021	C3orf38	protein_coding	803.604	-0.331116	0.102277	-3.23745	0.00120602	0.03893
ENSG00000182810	DDX28	protein_coding	503.986	-0.452144	0.139681	-3.23697	0.00120806	0.03893
ENSG00000260563	RP13-516M14.1	lincRNA	61.9281	0.541683	0.16741	3.23567	0.00121357	0.039003
ENSG00000179454	KLHL28	protein_coding	414.32	-0.364992	0.112896	-3.23298	0.00122507	0.0392676
ENSG00000167733	HSD11B1L	protein_coding	26.6127	-0.49136	0.152038	-3.23182	0.00123006	0.0393225
ENSG00000162928	PEX13	protein_coding	252.322	-0.473615	0.14659	-3.23089	0.00123404	0.0393453
ENSG00000183876	ARSI	protein_coding	0.811719	-0.668844	0.207039	-3.23051	0.00123568	NA
ENSG00000260966	RP11-690D19.3	sense_overlapping	48.9876	-0.589359	0.182461	-3.23005	0.00123769	0.0393571
ENSG00000268471	MIR4453	lincRNA	18.6788	0.619041	0.191767	3.2281	0.00124617	NA
ENSG00000111837	MAK	protein_coding	88.7367	0.59838	0.185379	3.22788	0.00124713	0.0395213
ENSG00000198740	ZNF652	protein_coding	866.709	-0.302481	0.0937241	-3.22735	0.00124943	0.0395213
ENSG00000220205	VAMP2	protein_coding	1473.01	-0.276192	0.0855994	-3.22656	0.00125288	0.0395264
ENSG00000104432	IL7	protein_coding	20.9638	0.695605	0.215614	3.22616	0.00125464	NA
ENSG00000167747	C19orf48	protein_coding	202.493	-0.429747	0.133251	-3.22509	0.00125933	0.039626
ENSG00000086065	CHMP5	protein_coding	1106.11	0.545481	0.169269	3.22256	0.0012705	0.0397792
ENSG00000198818	SFT2D1	protein_coding	1002.49	0.315745	0.0979881	3.22228	0.00127176	0.0397792
ENSG00000100519	PSMC6	protein_coding	839.06	0.354482	0.110028	3.22174	0.00127413	0.0397792
ENSG00000196313	POM121	protein_coding	1144.8	-0.410955	0.127914	-3.21273	0.00131479	0.0409425
ENSG00000051108	HERPUD1	protein_coding	3778.11	-0.474178	0.147675	-3.21096	0.00132293	0.0410896
ENSG00000160193	WDR4	protein_coding	93.0452	-0.378537	0.117951	-3.20928	0.00133068	0.0411019
ENSG00000177058	SLC38A9	protein_coding	291.393	0.333679	0.103976	3.2092	0.00133104	0.0411019
ENSG00000147804	SLC39A4	protein_coding	107.786	-0.555141	0.173014	-3.20865	0.00133359	0.0411019
ENSG00000225964	AC017076.5	antisense	34.8625	0.972953	0.303381	3.20703	0.00134113	0.0412236
ENSG00000224272	AC114730.3	antisense	1.53082	0.880651	0.274619	3.20681	0.00134214	NA
ENSG00000272181	RP11-245J9.6	antisense	2.20066	0.968798	0.30211	3.20677	0.00134233	NA
ENSG00000271646	RP11-326I11.3	lincRNA	75.0949	0.572899	0.178699	3.20594	0.00134622	0.0412236
ENSG00000163554	SPTA1	protein_coding	6.42897	0.864158	0.269555	3.20587	0.00134657	NA
ENSG00000159873	CCDC117	protein_coding	76.4178	-0.405181	0.126398	-3.2056	0.00134783	0.0412236
ENSG00000164975	SNAPC3	protein_coding	501.982	0.551742	0.172308	3.20207	0.00136443	0.0415238
ENSG00000149658	YTHDF1	protein_coding	1334.36	-0.318888	0.0995887	-3.20205	0.00136455	0.0415238
ENSG00000127922	SHFM1	protein_coding	884.41	0.333903	0.10443	3.19738	0.00138681	0.04205
ENSG00000125817	CENPB	protein_coding	2141.39	-0.454897	0.14229	-3.19696	0.00138884	0.04205
ENSG00000139438	FAM222A	protein_coding	8.15291	-0.846363	0.264891	-3.19514	0.00139762	NA
ENSG00000279706	RP11-561O23.9	TEC	1.58097	0.927299	0.290358	3.19364	0.00140492	NA
ENSG00000199121	MIR26B	miRNA	8.35701	0.828821	0.259565	3.19311	0.00140747	NA
ENSG00000035141	FAM136A	protein_coding	502.182	-0.237314	0.0744857	-3.18603	0.00144239	0.0435616
ENSG00000181220	ZNF746	protein_coding	783.063	-0.416039	0.130714	-3.18282	0.0014585	0.0438331
ENSG00000105643	ARRDC2	protein_coding	2092.24	-0.329658	0.103581	-3.18262	0.00145949	0.0438331
ENSG00000101265	RASSF2	protein_coding	11553.6	-0.257371	0.080882	-3.18206	0.00146232	0.0438331
ENSG00000111237	VPS29	protein_coding	1597.69	0.350822	0.110307	3.1804	0.0014707	0.0439747
ENSG00000073331	ALPK1	protein_coding	464.654	0.494081	0.155541	3.17654	0.00149045	0.0443681
ENSG00000260916	CCPG1	protein_coding	466.086	0.455375	0.143413	3.17526	0.00149702	0.0443681
ENSG00000102078	SLC25A14	protein_coding	111.37	0.425414	0.134011	3.17447	0.00150108	0.0443681
ENSG00000152464	RPP38	protein_coding	77.5326	-0.405764	0.127835	-3.17412	0.00150291	0.0443681
ENSG00000153250	RBMS1	protein_coding	3990.34	0.338263	0.106589	3.17353	0.00150596	0.0443681
ENSG00000198417	MT1F	protein_coding	89.31	0.668749	0.21075	3.17318	0.00150778	0.0443681
ENSG00000258819	RP11-7F17.3	lincRNA	1.77754	0.919925	0.289925	3.17298	0.00150885	NA
ENSG00000167977	KCTD5	protein_coding	895.604	-0.444317	0.140039	-3.17281	0.0015097	0.0443681
ENSG00000067836	ROGDI	protein_coding	1924.98	-0.490226	0.154609	-3.17076	0.00152042	0.0445397
ENSG00000063587	ZNF275	protein_coding	227.284	-0.368148	0.116125	-3.17028	0.00152295	0.0445397
ENSG00000152102	FAM168B	protein_coding	2210.24	-0.465464	0.14696	-3.16729	0.00153869	0.044891
ENSG00000167491	GATAD2A	protein_coding	1763.71	-0.439702	0.138992	-3.16351	0.0015588	0.0453676
ENSG00000171049	FPR2	protein_coding	1760.47	0.707571	0.223793	3.16171	0.00156844	0.0454538
ENSG00000149823	VPS51	protein_coding	1757.57	-0.448201	0.141766	-3.16155	0.00156933	0.0454538
ENSG00000053254	FOXN3	protein_coding	3982.68	-0.310728	0.0983457	-3.15955	0.00158014	0.0455869
ENSG00000188313	PLSCR1	protein_coding	3504.29	0.553156	0.175088	3.1593	0.00158151	0.0455869
ENSG00000127804	METTL16	protein_coding	485.108	-0.389265	0.12342	-3.15398	0.00161059	0.0462163
ENSG00000156313	RPGR	protein_coding	287.912	0.468442	0.148528	3.1539	0.00161103	0.0462163
ENSG00000271064	RP11-792A8.3	processed_pseudogene	4.05057	0.936701	0.297075	3.15308	0.00161555	NA
ENSG00000140743	CDR2	protein_coding	182.634	-0.364513	0.115622	-3.15262	0.00161814	0.0463095
ENSG00000198814	GK	protein_coding	1088.85	0.485467	0.15404	3.15157	0.00162396	0.0463448
ENSG00000198677	TTC37	protein_coding	856.388	0.365095	0.115866	3.15101	0.00162708	0.0463448
ENSG00000258679	RP11-74M13.4	transcribed_processed_pseudogene	1.01754	-0.931517	0.295773	-3.14944	0.00163586	NA
ENSG00000266947	RP11-799D4.4	antisense	17.985	0.731598	0.232378	3.14831	0.0016422	NA
ENSG00000167487	KLHL26	protein_coding	189.321	-0.473965	0.150684	-3.14542	0.0016585	0.0470763
ENSG00000177054	ZDHHC13	protein_coding	134.989	0.524143	0.166656	3.14505	0.00166059	0.0470763
ENSG00000169641	LUZP1	protein_coding	676.29	-0.519199	0.165182	-3.14319	0.00167118	0.0472154
ENSG00000121931	LRIF1	protein_coding	79.1125	0.554512	0.176439	3.14281	0.00167336	0.0472154
ENSG00000126464	PRR12	protein_coding	706.817	-0.420978	0.134002	-3.14158	0.0016804	0.047303
ENSG00000163666	HESX1	protein_coding	16.0751	0.928198	0.295564	3.14043	0.00168702	NA
ENSG00000127954	STEAP4	protein_coding	899.993	0.590956	0.188307	3.13826	0.00169953	0.0477297
ENSG00000155254	MARVELD1	protein_coding	1174.11	-0.598489	0.190767	-3.13727	0.00170527	0.0477793
ENSG00000159915	ZNF233	protein_coding	4.02841	0.927243	0.295607	3.13674	0.00170837	NA
ENSG00000130150	MOSPD2	protein_coding	960.54	0.760135	0.242369	3.13628	0.00171106	0.0478302
ENSG00000260467	RP11-405F3.4	antisense	3.03597	0.94639	0.301798	3.13584	0.00171363	NA
ENSG00000182307	C8orf33	protein_coding	623.887	-0.298519	0.0953355	-3.13125	0.00174065	0.0485443
ENSG00000167130	DOLPP1	protein_coding	171.816	-0.386539	0.123484	-3.13027	0.00174644	0.048593
ENSG00000174456	C12orf76	protein_coding	159.152	0.410714	0.13126	3.129	0.00175401	0.0486909
ENSG00000108651	UTP6	protein_coding	849.151	0.386074	0.123519	3.12563	0.00177424	0.049139
ENSG00000238025	ZDHHC4P1	processed_pseudogene	2.05322	0.922612	0.295457	3.12266	0.00179224	NA
ENSG00000185897	FFAR3	protein_coding	40.6463	0.899779	0.288247	3.12155	0.00179902	0.0494473
ENSG00000020577	SAMD4A	protein_coding	278.887	0.789145	0.25285	3.121	0.00180237	0.0494473
ENSG00000277778	PGM5P2	lincRNA	6.88238	0.77584	0.248648	3.12023	0.0018071	NA
ENSG00000198794	SCAMP5	protein_coding	51.5795	-0.768539	0.246333	-3.11992	0.00180899	0.0494473
ENSG00000101213	PTK6	protein_coding	87.4987	0.552625	0.177135	3.1198	0.00180972	0.0494473
ENSG00000171793	CTPS1	protein_coding	195.454	-0.375731	0.120459	-3.11917	0.00181362	0.0494473
ENSG00000110619	CARS	protein_coding	814.436	0.312443	0.100174	3.11899	0.00181472	0.0494473
ENSG00000234608	MAPKAPK5-AS1	lincRNA	286.346	-0.47953	0.153769	-3.11851	0.00181769	0.0494473
ENSG00000129696	TTI2	protein_coding	111.112	-0.435491	0.139652	-3.11841	0.00181828	0.0494473
ENSG00000252172	RNU6-720P	snRNA	2.10048	0.943568	0.302714	3.11703	0.00182685	NA
ENSG00000048471	SNX29	protein_coding	2126.45	-0.341431	0.109564	-3.11626	0.00183158	0.0496966
ENSG00000144218	AFF3	protein_coding	167.673	-0.693305	0.22256	-3.11514	0.00183859	0.0497744
ENSG00000251661	RP11-326C3.11	antisense	14.0111	0.833205	0.267608	3.11353	0.00184864	NA
ENSG00000272563	RP11-480C16.1	lincRNA	2.30389	0.941891	0.302626	3.11239	0.00185578	NA
ENSG00000159579	RSPRY1	protein_coding	438.477	0.252988	0.0813032	3.11166	0.00186036	0.0502382
ENSG00000080031	PTPRH	protein_coding	10.6054	0.932482	0.299702	3.11137	0.00186222	NA
ENSG00000268061	NAPA-AS1	antisense	16.7877	0.645363	0.207434	3.11118	0.00186343	NA
ENSG00000100034	PPM1F	protein_coding	4991.69	-0.275509	0.0885574	-3.11107	0.00186408	0.0502382
ENSG00000232453	RP4-794H19.1	lincRNA	11.1238	-0.675395	0.217203	-3.10951	0.00187396	NA
ENSG00000149554	CHEK1	protein_coding	27.6076	-0.513169	0.165071	-3.10879	0.00187858	0.0505158
ENSG00000223960	AC009948.5	antisense	145.477	0.581301	0.187063	3.10752	0.00188665	0.0505442
ENSG00000228878	SEPT7-AS1	lincRNA	45.5104	0.499508	0.160753	3.1073	0.00188805	0.0505442
ENSG00000140564	FURIN	protein_coding	5604.1	-0.451231	0.145319	-3.10512	0.00190203	0.0508054
ENSG00000104714	ERICH1	protein_coding	1452.1	0.289622	0.0933398	3.10287	0.00191651	0.0509908
ENSG00000146109	ABT1	protein_coding	810.862	-0.310922	0.100209	-3.10273	0.00191746	0.0509908
ENSG00000023041	ZDHHC6	protein_coding	769.765	0.268576	0.0865866	3.10182	0.00192336	0.0509997
ENSG00000112079	STK38	protein_coding	2655.48	0.346763	0.11181	3.10137	0.00192628	0.0509997
ENSG00000205846	CLEC6A	protein_coding	195.322	0.580103	0.187115	3.10026	0.00193354	0.0510793
ENSG00000196116	TDRD7	protein_coding	604.393	0.547077	0.176566	3.09842	0.00194554	0.0512838
ENSG00000215068	AC025171.1	antisense	66.1031	0.525241	0.169672	3.09562	0.00196404	0.0514977
ENSG00000270802	AC005776.1	processed_pseudogene	1.56242	0.915079	0.295717	3.09444	0.00197183	NA
ENSG00000171503	ETFDH	protein_coding	284.327	0.39934	0.129068	3.09404	0.00197451	0.0514977
ENSG00000162413	KLHL21	protein_coding	762.875	-0.582276	0.188193	-3.09403	0.00197456	0.0514977
ENSG00000115415	STAT1	protein_coding	7558.69	0.671619	0.217097	3.09364	0.00197716	0.0514977
ENSG00000144224	UBXN4	protein_coding	2339.62	0.260131	0.0840913	3.09344	0.0019785	0.0514977
ENSG00000112053	SLC26A8	protein_coding	36.5936	0.766553	0.24781	3.09331	0.00197936	0.0514977
ENSG00000009790	TRAF3IP3	protein_coding	1774.45	0.387891	0.125579	3.08881	0.00200957	0.0521706
ENSG00000129355	CDKN2D	protein_coding	2975.18	-0.438836	0.142104	-3.08814	0.00201411	0.0521758
ENSG00000129465	RIPK3	protein_coding	300.372	0.469762	0.152395	3.08252	0.00205255	0.0529261
ENSG00000136738	STAM	protein_coding	338.003	-0.279994	0.0908536	-3.08182	0.00205742	0.0529261
ENSG00000196453	ZNF777	protein_coding	225.014	-0.487578	0.158219	-3.08166	0.00205847	0.0529261
ENSG00000213064	SFT2D2	protein_coding	2633.43	-0.35713	0.115913	-3.08102	0.00206289	0.0529261
ENSG00000171206	TRIM8	protein_coding	4637.18	-0.332825	0.108035	-3.08071	0.00206509	0.0529261
ENSG00000101596	SMCHD1	protein_coding	5497.24	0.452084	0.146898	3.07754	0.00208716	0.0533779
ENSG00000112297	AIM1	protein_coding	2012.95	0.270275	0.0878842	3.07536	0.00210252	0.0536566
ENSG00000136699	SMPD4	protein_coding	754.549	-0.370378	0.120538	-3.07272	0.00212119	0.0539427
ENSG00000135048	TMEM2	protein_coding	1988.36	0.38903	0.126616	3.07251	0.0021227	0.0539427
ENSG00000152465	NMT2	protein_coding	30.0746	-0.534834	0.174158	-3.07098	0.00213359	0.0540267
ENSG00000091542	ALKBH5	protein_coding	1560.05	-0.380489	0.123906	-3.07078	0.002135	0.0540267
ENSG00000219665	CTD-2006C1.2	processed_transcript	72.4905	-0.481657	0.156959	-3.06868	0.00215008	0.0541725
ENSG00000117394	SLC2A1	protein_coding	176.915	-0.786419	0.256313	-3.0682	0.00215351	0.0541725
ENSG00000181704	YIPF6	protein_coding	359.59	0.371349	0.12106	3.06748	0.0021587	0.0541725
ENSG00000138768	USO1	protein_coding	1082.98	0.342448	0.111639	3.06747	0.00215879	0.0541725
ENSG00000124102	PI3	protein_coding	33.4031	0.907087	0.29589	3.06562	0.00217219	0.0543029
ENSG00000119950	MXI1	protein_coding	1115.26	-0.351721	0.114735	-3.06551	0.00217302	0.0543029
ENSG00000173511	VEGFB	protein_coding	100.612	-0.557017	0.181883	-3.0625	0.00219496	0.0547193
ENSG00000184216	IRAK1	protein_coding	4026.87	-0.349863	0.11426	-3.06198	0.00219879	0.0547193
ENSG00000261221	ZNF865	protein_coding	708.3	-0.474786	0.155274	-3.05773	0.00223021	0.0553412
ENSG00000111331	OAS3	protein_coding	6216.3	0.821048	0.268548	3.05736	0.00223299	0.0553412
ENSG00000132357	CARD6	protein_coding	425.992	0.469075	0.153583	3.05421	0.00225656	0.0558104
ENSG00000113532	ST8SIA4	protein_coding	1813.85	0.359765	0.117847	3.05282	0.00226702	0.055954
ENSG00000213463	SYNJ2BP	protein_coding	213.893	0.45591	0.149402	3.05157	0.00227651	0.0560385
ENSG00000268818	CITF22-62D4.1	sense_intronic	0.972182	0.883586	0.289569	3.05139	0.00227787	NA
ENSG00000124357	NAGK	protein_coding	4537.67	0.42506	0.139312	3.05114	0.00227977	0.0560385
ENSG00000196684	HSH2D	protein_coding	1147.62	0.655512	0.21496	3.04946	0.0022925	0.0562364
ENSG00000173193	PARP14	protein_coding	4075.74	0.702033	0.230298	3.04837	0.00230084	0.056326
ENSG00000084112	SSH1	protein_coding	2053.8	-0.356854	0.117217	-3.04439	0.00233152	0.0569612
ENSG00000214517	PPME1	protein_coding	177.809	0.314272	0.103312	3.04197	0.00235033	0.0573041
ENSG00000270959	LPP-AS2	antisense	56.7356	0.43694	0.143736	3.03987	0.00236682	0.0575895
ENSG00000135622	SEMA4F	protein_coding	12.3893	0.741239	0.243888	3.03926	0.00237159	NA
ENSG00000227500	SCAMP4	protein_coding	1007.7	-0.373556	0.12292	-3.03901	0.0023736	0.0576377
ENSG00000118596	SLC16A7	protein_coding	604.762	0.371207	0.122211	3.03743	0.00238604	0.0578231
ENSG00000106608	URGCP	protein_coding	236.869	-0.516122	0.170056	-3.03502	0.00240521	0.0581703
ENSG00000267547	RP11-686D22.4	lincRNA	14.554	0.65538	0.215984	3.0344	0.00241018	NA
ENSG00000263535	AK4P1	processed_pseudogene	0.709049	-0.816694	0.269159	-3.03424	0.0024114	NA
ENSG00000271581	XXbac-BPG248L24.12	unprocessed_pseudogene	2.7931	0.911708	0.300601	3.03294	0.0024218	NA
ENSG00000139163	ETNK1	protein_coding	823.473	0.475957	0.157049	3.03063	0.00244044	0.0588522
ENSG00000278600	RP11-81A1.6	sense_intronic	273.865	0.570984	0.188465	3.02965	0.00244833	0.0588522
ENSG00000140992	PDPK1	protein_coding	1699.9	-0.276247	0.091205	-3.02886	0.00245478	0.0588522
ENSG00000096968	JAK2	protein_coding	3525.43	0.395523	0.130595	3.02862	0.0024567	0.0588522
ENSG00000164091	WDR82	protein_coding	3875.85	-0.325052	0.107368	-3.02747	0.00246614	0.0588522
ENSG00000179091	CYC1	protein_coding	2049.7	-0.309917	0.102369	-3.02746	0.00246614	0.0588522
ENSG00000057252	SOAT1	protein_coding	1864.88	0.235754	0.0778764	3.02728	0.00246768	0.0588522
ENSG00000109118	PHF12	protein_coding	1573.8	-0.357128	0.118031	-3.02573	0.00248035	0.0590373
ENSG00000119411	BSPRY	protein_coding	3.42255	-0.919096	0.303838	-3.02496	0.00248669	NA
ENSG00000028203	VEZT	protein_coding	608.315	0.319927	0.105792	3.02412	0.00249354	0.059234
ENSG00000144560	VGLL4	protein_coding	279.994	-0.292621	0.0968432	-3.02159	0.00251448	0.0593221
ENSG00000149428	HYOU1	protein_coding	1516.5	-0.374801	0.124042	-3.02156	0.00251479	0.0593221
ENSG00000069998	CECR5	protein_coding	1094.51	-0.416117	0.137724	-3.02138	0.00251629	0.0593221
ENSG00000109084	TMEM97	protein_coding	32.1109	-0.637533	0.211069	-3.02049	0.00252366	0.0593221
ENSG00000182749	PAQR7	protein_coding	286.515	-0.392742	0.130038	-3.02022	0.00252595	0.0593221
ENSG00000186575	NF2	protein_coding	481.471	-0.289081	0.0957188	-3.02011	0.00252686	0.0593221
ENSG00000186174	BCL9L	protein_coding	558.181	-0.501225	0.166016	-3.01915	0.00253488	0.0593744
ENSG00000136051	KIAA1033	protein_coding	3632	0.359755	0.119177	3.01866	0.00253897	0.0593744
ENSG00000137996	RTCA	protein_coding	535.351	0.291182	0.0965296	3.0165	0.0025571	0.0595361
ENSG00000168924	LETM1	protein_coding	605.75	-0.256811	0.0851409	-3.01631	0.00255872	0.0595361
ENSG00000178700	DHFRL1	protein_coding	52.4824	0.593336	0.196725	3.01607	0.00256074	0.0595361
ENSG00000114670	NEK11	protein_coding	17.4346	0.651716	0.216263	3.01353	0.00258226	NA
ENSG00000211677	IGLC2	IG_C_gene	36.688	0.911814	0.302711	3.01216	0.00259396	0.0601919
ENSG00000115806	GORASP2	protein_coding	1070.93	-0.268249	0.0891002	-3.01064	0.00260697	0.0602846
ENSG00000121486	TRMT1L	protein_coding	180.472	0.435631	0.144709	3.01039	0.00260911	0.0602846
ENSG00000090989	EXOC1	protein_coding	827.177	0.391097	0.12995	3.00961	0.00261587	0.0602846
ENSG00000167895	TMC8	protein_coding	2243.15	-0.305826	0.101629	-3.00924	0.00261898	0.0602846
ENSG00000135632	SMYD5	protein_coding	103.428	-0.359909	0.119625	-3.00866	0.00262405	0.0602846
ENSG00000125676	THOC2	protein_coding	1298.22	0.349532	0.116193	3.00819	0.00262805	0.0602846
ENSG00000100191	SLC5A4	protein_coding	2.14864	0.862144	0.286675	3.00739	0.00263502	NA
ENSG00000172053	QARS	protein_coding	4442.04	-0.298431	0.099254	-3.00674	0.00264066	0.0604585
ENSG00000059378	PARP12	protein_coding	1372.67	0.617224	0.205416	3.00474	0.00265804	0.0606313
ENSG00000141905	NFIC	protein_coding	865.265	-0.368068	0.122497	-3.00472	0.00265829	0.0606313
ENSG00000179041	RRS1	protein_coding	192.348	-0.424289	0.141243	-3.00397	0.00266482	0.060665
ENSG00000158715	SLC45A3	protein_coding	29.9711	-0.818436	0.272537	-3.00303	0.00267303	0.060737
ENSG00000242732	RGAG4	protein_coding	193.502	-0.562179	0.187309	-3.00135	0.00268783	0.060958
ENSG00000253123	RP11-527N22.1	processed_transcript	2.2991	0.905317	0.301749	3.00023	0.00269775	NA
ENSG00000196782	MAML3	protein_coding	1397.28	-0.376828	0.125611	-2.99996	0.00270017	0.0609823
ENSG00000009844	VTA1	protein_coding	656.837	0.497102	0.165773	2.9987	0.00271134	0.0609823
ENSG00000151092	NGLY1	protein_coding	599.392	0.295039	0.0983897	2.99868	0.00271154	0.0609823
ENSG00000146376	ARHGAP18	protein_coding	510.338	0.450852	0.150367	2.99835	0.00271443	0.0609823
ENSG00000142002	DPP9	protein_coding	1154.51	-0.266786	0.0889875	-2.99802	0.00271738	0.0609823
ENSG00000108771	DHX58	protein_coding	743.886	0.686926	0.229143	2.9978	0.00271934	0.0609823
ENSG00000180871	CXCR2	protein_coding	403.411	0.844578	0.281883	2.9962	0.00273369	0.0611898
ENSG00000145715	RASA1	protein_coding	760.499	0.413974	0.138245	2.9945	0.00274895	0.061417
ENSG00000089234	BRAP	protein_coding	499.894	-0.304011	0.101582	-2.99276	0.00276466	0.0615613
ENSG00000156398	SFXN2	protein_coding	30.0866	-0.518637	0.173304	-2.99265	0.00276565	0.0615613
ENSG00000111850	SMIM8	protein_coding	56.1914	0.404183	0.135179	2.98999	0.00278984	0.0618198
ENSG00000127824	TUBA4A	protein_coding	1104.41	-0.38876	0.130021	-2.98997	0.00279005	0.0618198
ENSG00000176619	LMNB2	protein_coding	464.298	-0.334787	0.111981	-2.98968	0.00279269	0.0618198
ENSG00000180233	ZNRF2	protein_coding	904.483	0.295594	0.0989387	2.98764	0.00281138	0.0621191
ENSG00000211662	IGLV3-21	IG_V_gene	3.60298	0.847947	0.283906	2.98671	0.00281994	NA
ENSG00000162783	IER5	protein_coding	4363.7	-0.497395	0.166709	-2.98361	0.00284868	0.0628278
ENSG00000115091	ACTR3	protein_coding	9171.52	0.352008	0.118085	2.98097	0.00287341	0.0630488
ENSG00000110104	CCDC86	protein_coding	158.697	-0.374628	0.125691	-2.98054	0.00287738	0.0630488
ENSG00000134061	CD180	protein_coding	412.786	0.735703	0.246854	2.98031	0.00287954	0.0630488
ENSG00000262049	RP13-1032I1.7	antisense	75.7032	-0.443021	0.14866	-2.98009	0.00288168	0.0630488
ENSG00000160094	ZNF362	protein_coding	599.549	-0.355164	0.119193	-2.97974	0.00288493	0.0630488
ENSG00000169245	CXCL10	protein_coding	160.463	0.873946	0.293384	2.97885	0.00289336	0.0631183
ENSG00000077420	APBB1IP	protein_coding	3158.06	0.375695	0.126269	2.97536	0.00292641	0.0637236
ENSG00000273314	RP5-1136G13.2	antisense	27.4248	0.732876	0.246409	2.97423	0.00293724	0.0638437
ENSG00000130881	LRP3	protein_coding	593.168	-0.47135	0.158674	-2.97056	0.00297257	0.064495
ENSG00000123610	TNFAIP6	protein_coding	87.6199	0.792389	0.266865	2.96925	0.00298531	0.064602
ENSG00000267040	RP11-35G9.3	antisense	63.8765	0.533036	0.179537	2.96894	0.00298825	0.064602
ENSG00000079385	CEACAM1	protein_coding	25.7681	0.853965	0.287695	2.9683	0.0029945	0.0646211
ENSG00000254812	RP11-661A12.12	antisense	0.697541	0.78427	0.264221	2.96824	0.00299513	NA
ENSG00000148925	BTBD10	protein_coding	311.517	0.409254	0.137982	2.96599	0.00301711	0.064902
ENSG00000117228	GBP1	protein_coding	1568.17	0.803621	0.27099	2.9655	0.00302192	0.064902
ENSG00000026103	FAS	protein_coding	875.645	0.420719	0.14188	2.96532	0.00302372	0.064902
ENSG00000152582	SPEF2	protein_coding	36.7479	0.584706	0.197448	2.96131	0.00306331	0.0655364
ENSG00000213341	CHUK	protein_coding	809.227	0.239857	0.0810014	2.96115	0.00306497	0.0655364
ENSG00000006576	PHTF2	protein_coding	719.309	0.382486	0.129206	2.96028	0.00307357	0.0655364
ENSG00000197785	ATAD3A	protein_coding	258.756	-0.327768	0.110727	-2.96013	0.00307509	0.0655364
ENSG00000186615	KTN1-AS1	antisense	3.91115	-0.867582	0.293178	-2.95923	0.00308406	NA
ENSG00000229320	KRT8P12	transcribed_processed_pseudogene	65.5801	0.545111	0.184214	2.95912	0.00308515	0.0656344
ENSG00000109929	SC5D	protein_coding	169.925	0.368536	0.124578	2.95828	0.00309364	0.0656989
ENSG00000122033	MTIF3	protein_coding	448.007	0.397173	0.134366	2.95591	0.0031175	0.0660464
ENSG00000126705	AHDC1	protein_coding	180.349	-0.450894	0.152559	-2.95553	0.00312132	0.0660464
ENSG00000128000	ZNF780B	protein_coding	71.8948	0.633432	0.214358	2.95502	0.00312649	0.0660464
ENSG00000171444	MCC	protein_coding	12.0152	-0.726033	0.245729	-2.95461	0.00313063	NA
ENSG00000092847	37104	protein_coding	1717.41	-0.258086	0.0873985	-2.95298	0.00314721	0.0663674
ENSG00000230383	AC009245.3	processed_pseudogene	2.12223	-0.893477	0.302573	-2.95293	0.00314773	NA
ENSG00000132294	EFR3A	protein_coding	1827.44	0.351494	0.119077	2.95183	0.00315897	0.0664989
ENSG00000221866	PLXNA4	protein_coding	19.2313	-0.894824	0.303333	-2.94997	0.00317802	NA
ENSG00000127423	AUNIP	protein_coding	21.2659	-0.541775	0.18383	-2.94715	0.00320721	NA
ENSG00000068654	POLR1A	protein_coding	394.998	-0.343025	0.116407	-2.94677	0.00321112	0.0674784
ENSG00000103326	CAPN15	protein_coding	1246.2	-0.400197	0.13589	-2.94501	0.00322946	0.0677041
ENSG00000175602	CCDC85B	protein_coding	649.639	-0.553465	0.187956	-2.94466	0.00323312	0.0677041
ENSG00000070190	DAPP1	protein_coding	1794.81	0.4394	0.149298	2.94312	0.00324925	0.0677718
ENSG00000152127	MGAT5	protein_coding	685.087	-0.341015	0.115874	-2.94299	0.00325059	0.0677718
ENSG00000145725	PPIP5K2	protein_coding	1780.27	0.203591	0.0691931	2.94236	0.00325721	0.0677718
ENSG00000147996	CBWD5	protein_coding	180.904	0.566019	0.19238	2.9422	0.00325891	0.0677718
ENSG00000164849	GPR146	protein_coding	2.94012	-0.867967	0.295275	-2.93952	0.0032872	NA
ENSG00000152422	XRCC4	protein_coding	364.714	0.320792	0.109185	2.93807	0.00330266	0.0685629
ENSG00000101040	ZMYND8	protein_coding	446.498	0.332844	0.113316	2.93731	0.00331078	0.0685854
ENSG00000169871	TRIM56	protein_coding	213.569	0.441637	0.150397	2.93648	0.0033196	0.0685854
ENSG00000117242	PINK1-AS	antisense	48.6216	-0.434313	0.147909	-2.93636	0.00332086	0.0685854
ENSG00000101945	SUV39H1	protein_coding	90.5125	-0.407562	0.138878	-2.93467	0.00333907	0.0686995
ENSG00000151332	MBIP	protein_coding	226.857	-0.325745	0.111004	-2.93453	0.00334054	0.0686995
ENSG00000077684	JADE1	protein_coding	620.958	-0.335783	0.114446	-2.934	0.00334629	0.0686995
ENSG00000185085	INTS5	protein_coding	174.978	-0.456952	0.155758	-2.93372	0.00334924	0.0686995
ENSG00000188092	GPR89B	protein_coding	37.3518	0.51092	0.174309	2.93111	0.00337748	0.0690757
ENSG00000115295	CLIP4	protein_coding	850.51	0.448904	0.153159	2.93097	0.00337908	0.0690757
ENSG00000182919	C11orf54	protein_coding	298.112	0.431057	0.147114	2.9301	0.00338857	0.0691521
ENSG00000140455	USP3	protein_coding	2210.12	-0.256	0.0874112	-2.92868	0.00340403	0.0693411
ENSG00000120158	RCL1	protein_coding	117.8	-0.691533	0.236208	-2.92764	0.00341548	0.0693411
ENSG00000119820	YIPF4	protein_coding	572.748	0.467242	0.159597	2.92763	0.00341554	0.0693411
ENSG00000144867	SRPRB	protein_coding	294.789	-0.320595	0.109525	-2.92714	0.0034209	0.0693411
ENSG00000229638	RPL4P4	processed_pseudogene	5.07768	-0.799025	0.273024	-2.92657	0.00342724	NA
ENSG00000265018	CTGLF12P	transcribed_unprocessed_pseudogene	3.12009	-0.863524	0.295143	-2.92578	0.00343595	NA
ENSG00000163833	FBXO40	protein_coding	22.9169	-0.725611	0.248008	-2.92576	0.00343614	NA
ENSG00000138613	APH1B	protein_coding	473.111	0.309036	0.105659	2.92483	0.00344644	0.0697411
ENSG00000261055	RP11-195M16.3	lincRNA	2.97831	0.884233	0.30256	2.9225	0.00347231	NA
ENSG00000230185	C9orf147	antisense	0.95858	0.84294	0.288446	2.92235	0.00347395	NA
ENSG00000172775	FAM192A	protein_coding	1319.19	0.262545	0.0898506	2.92202	0.00347767	0.0702548
ENSG00000163125	RPRD2	protein_coding	1005.63	-0.2963	0.101444	-2.92081	0.00349122	0.0704101
ENSG00000265972	TXNIP	protein_coding	43407.6	-0.524877	0.179768	-2.91975	0.00350312	0.0705319
ENSG00000122140	MRPS2	protein_coding	226.349	-0.348948	0.119573	-2.91827	0.00351975	0.0707482
ENSG00000163565	IFI16	protein_coding	3713.01	0.555187	0.190368	2.91639	0.00354107	0.0710578
ENSG00000272821	CTA-384D8.36	antisense	227.872	0.751476	0.257767	2.91533	0.00355314	0.0711565
ENSG00000173020	ADRBK1	protein_coding	14047.6	-0.230937	0.079226	-2.91492	0.00355782	0.0711565
ENSG00000118971	CCND2	protein_coding	301.845	-0.751718	0.258082	-2.91271	0.00358307	0.0714645
ENSG00000118197	DDX59	protein_coding	494.558	0.295592	0.10149	2.91253	0.00358511	0.0714645
ENSG00000089220	PEBP1	protein_coding	851.48	-0.386219	0.1327	-2.91047	0.00360885	0.0717945
ENSG00000135521	LTV1	protein_coding	233.338	-0.344844	0.118519	-2.9096	0.00361886	0.0717945
ENSG00000109501	WFS1	protein_coding	22.9881	-0.648409	0.222854	-2.90957	0.00361921	NA
ENSG00000115084	SLC35F5	protein_coding	376.9	0.314102	0.107956	2.90954	0.00361959	0.0717945
ENSG00000185504	C17orf70	protein_coding	1045.56	-0.302655	0.104097	-2.90742	0.00364419	0.0721634
ENSG00000196387	ZNF140	protein_coding	83.1037	0.448506	0.154323	2.90628	0.00365759	0.0722788
ENSG00000115155	OTOF	protein_coding	41.7986	0.850775	0.292809	2.90556	0.00366592	0.0722788
ENSG00000198924	DCLRE1A	protein_coding	58.7819	0.41054	0.141314	2.90515	0.00367071	0.0722788
ENSG00000115526	CHST10	protein_coding	24.832	-0.706414	0.243241	-2.90417	0.0036823	0.0722788
ENSG00000165283	STOML2	protein_coding	670.937	-0.253237	0.0872043	-2.90396	0.0036848	0.0722788
ENSG00000100784	RPS6KA5	protein_coding	290.525	0.385139	0.132635	2.90375	0.0036872	0.0722788
ENSG00000131043	AAR2	protein_coding	810.205	-0.312924	0.107793	-2.90302	0.00369582	0.0722788
ENSG00000153561	RMND5A	protein_coding	1791.18	-0.225697	0.0777507	-2.90283	0.00369813	0.0722788
ENSG00000106665	CLIP2	protein_coding	860.082	-0.34267	0.118106	-2.90138	0.00371519	0.0724944
ENSG00000105427	CNFN	protein_coding	8.56927	-0.727827	0.250885	-2.90104	0.00371932	NA
ENSG00000277548	RP11-139H15.6	sense_intronic	6.2165	0.824952	0.284381	2.90087	0.00372126	NA
ENSG00000147894	C9orf72	protein_coding	4839.26	0.448122	0.154532	2.89987	0.0037332	0.0727278
ENSG00000185900	POMK	protein_coding	63.2309	-0.510817	0.176197	-2.89912	0.0037421	0.0727831
ENSG00000160803	UBQLN4	protein_coding	700.973	-0.274202	0.0946085	-2.89828	0.00375219	0.0728616
ENSG00000186834	HEXIM1	protein_coding	733.581	-0.407201	0.140539	-2.89744	0.00376226	0.0729393
ENSG00000250479	CHCHD10	protein_coding	425.016	-0.404911	0.139835	-2.89564	0.0037839	0.0732408
ENSG00000235888	AF064858.8	lincRNA	15.2371	0.656019	0.226565	2.8955	0.00378559	NA
ENSG00000066651	TRMT11	protein_coding	58.3309	0.511834	0.17685	2.89417	0.00380167	0.0734664
ENSG00000132361	CLUH	protein_coding	544.05	-0.385318	0.133173	-2.89336	0.00381144	0.0735369
ENSG00000114861	FOXP1	protein_coding	1102.28	-0.238239	0.0823621	-2.89258	0.00382087	0.0736006
ENSG00000076685	NT5C2	protein_coding	1450.44	0.296971	0.102735	2.89066	0.0038444	0.0738297
ENSG00000168016	TRANK1	protein_coding	849.583	0.547414	0.189377	2.8906	0.00384504	0.0738297
ENSG00000151164	RAD9B	protein_coding	30.9705	0.545693	0.188892	2.88892	0.00386566	0.0741072
ENSG00000182512	GLRX5	protein_coding	530.292	-0.320045	0.110816	-2.88809	0.00387588	0.0741849
ENSG00000198130	HIBCH	protein_coding	114.031	0.429749	0.148988	2.88445	0.00392101	0.0749292
ENSG00000121570	DPPA4	protein_coding	8.78575	-0.755692	0.262	-2.88433	0.00392251	NA
ENSG00000198863	RUNDC1	protein_coding	363.85	-0.448077	0.155375	-2.88384	0.00392861	0.0749554
ENSG00000138207	RBP4	protein_coding	3.61999	0.873039	0.302769	2.88351	0.00393266	NA
ENSG00000213066	FGFR1OP	protein_coding	92.0212	0.591072	0.205079	2.88217	0.00394949	0.0751472
ENSG00000115607	IL18RAP	protein_coding	31.2949	0.867986	0.301171	2.88203	0.00395117	0.0751472
ENSG00000158717	RNF166	protein_coding	3616.61	-0.297751	0.103349	-2.88103	0.00396383	0.075269
ENSG00000106628	POLD2	protein_coding	343.741	-0.371369	0.128927	-2.88046	0.003971	0.0752861
ENSG00000040633	PHF23	protein_coding	365.116	-0.348038	0.120855	-2.87979	0.00397937	0.0753259
ENSG00000068079	IFI35	protein_coding	1443.23	0.62258	0.216274	2.87865	0.00399376	0.0754325
ENSG00000213799	ZNF845	protein_coding	215.301	-0.481408	0.167293	-2.87764	0.00400666	0.0754325
ENSG00000139977	NAA30	protein_coding	344.068	-0.423837	0.14729	-2.87756	0.00400765	0.0754325
ENSG00000213949	ITGA1	protein_coding	82.6943	0.581827	0.202219	2.87722	0.004012	0.0754325
ENSG00000136682	CBWD2	protein_coding	434.751	0.414692	0.144147	2.87687	0.00401637	0.0754325
ENSG00000067066	SP100	protein_coding	2704.56	0.355622	0.123642	2.87623	0.00402452	0.0754595
ENSG00000197937	ZNF347	protein_coding	39.5446	0.450227	0.156559	2.87578	0.00403037	0.0754595
ENSG00000037897	METTL1	protein_coding	41.9605	-0.604878	0.210382	-2.87514	0.00403851	0.0754723
ENSG00000196141	SPATS2L	protein_coding	282.45	0.781384	0.27184	2.87443	0.0040476	0.0754723
ENSG00000106263	EIF3B	protein_coding	2443.62	-0.232301	0.0808216	-2.87425	0.00404989	0.0754723
ENSG00000168936	TMEM129	protein_coding	694.745	-0.334045	0.116306	-2.87212	0.00407725	0.0756745
ENSG00000159904	ZNF890P	transcribed_unprocessed_pseudogene	3.84474	0.831149	0.289398	2.872	0.00407888	NA
ENSG00000260336	RP11-395B7.7	sense_overlapping	246.299	0.522805	0.182073	2.8714	0.00408655	0.0756745
ENSG00000119471	HSDL2	protein_coding	619.589	0.456398	0.158951	2.87132	0.00408765	0.0756745
ENSG00000272520	CTD-2044J15.2	lincRNA	54.3415	0.598196	0.20834	2.87125	0.00408848	0.0756745
ENSG00000092051	JPH4	protein_coding	86.9151	0.434772	0.151446	2.8708	0.0040943	0.0756745
ENSG00000120647	CCDC77	protein_coding	70.2524	0.523044	0.182215	2.87047	0.00409859	0.0756745
ENSG00000131037	EPS8L1	protein_coding	42.076	0.576375	0.200828	2.86999	0.00410481	0.0756745
ENSG00000158201	ABHD3	protein_coding	758.484	0.461119	0.160741	2.86872	0.0041214	0.075778
ENSG00000188522	FAM83G	protein_coding	22.1171	-0.846639	0.295132	-2.86868	0.00412189	NA
ENSG00000141569	TRIM65	protein_coding	325.925	-0.329054	0.114725	-2.86821	0.00412804	0.075778
ENSG00000166225	FRS2	protein_coding	644.806	-0.275332	0.0960226	-2.86737	0.00413903	0.075778
ENSG00000136816	TOR1B	protein_coding	931.429	0.546161	0.190478	2.86732	0.00413964	0.075778
ENSG00000123064	DDX54	protein_coding	1054.19	-0.316524	0.110397	-2.86714	0.00414202	0.075778
ENSG00000198093	ZNF649	protein_coding	95.1692	-0.458322	0.15988	-2.86666	0.00414825	0.075778
ENSG00000177106	EPS8L2	protein_coding	8.76436	-0.856067	0.298701	-2.86597	0.00415739	NA
ENSG00000277283	RP1-267D11.6	antisense	31.616	0.45361	0.158437	2.86303	0.00419605	0.0762951
ENSG00000185305	ARL15	protein_coding	337.833	0.321532	0.112307	2.86297	0.00419685	0.0762951
ENSG00000204394	VARS	protein_coding	1151.14	-0.344461	0.120328	-2.86268	0.00420079	0.0762951
ENSG00000155380	SLC16A1	protein_coding	189.201	-0.357224	0.124811	-2.86212	0.00420818	0.0762951
ENSG00000179051	RCC2	protein_coding	2287.26	-0.330599	0.115519	-2.86186	0.00421169	0.0762951
ENSG00000148337	CIZ1	protein_coding	1872.75	-0.257531	0.0899982	-2.86151	0.00421622	0.0762951
ENSG00000175215	CTDSP2	protein_coding	6897.2	-0.313271	0.109491	-2.86116	0.00422099	0.0762951
ENSG00000246560	RP11-10L12.4	antisense	5.97332	0.770296	0.269317	2.86018	0.004234	NA
ENSG00000177971	IMP3	protein_coding	216.512	-0.37138	0.129858	-2.8599	0.0042377	0.0764823
ENSG00000153029	MR1	protein_coding	1520.13	0.286852	0.100343	2.85871	0.00425361	0.0765492
ENSG00000179604	CDC42EP4	protein_coding	551.509	-0.383379	0.134111	-2.85867	0.00425415	0.0765492
ENSG00000163568	AIM2	protein_coding	118.12	0.739177	0.258704	2.85723	0.00427357	0.0767838
ENSG00000267365	KCNJ2-AS1	antisense	16.0532	0.681872	0.238684	2.85681	0.00427928	NA
ENSG00000266853	ITM2BP1	processed_pseudogene	4.1516	0.864879	0.302804	2.85623	0.00428701	NA
ENSG00000257341	CRIP1	protein_coding	12.9095	0.807405	0.282956	2.85346	0.00432453	NA
ENSG00000172009	THOP1	protein_coding	255.112	-0.332326	0.116472	-2.85327	0.00432714	0.0775623
ENSG00000161179	YDJC	protein_coding	453.414	-0.389609	0.136558	-2.85308	0.00432981	0.0775623
ENSG00000138411	HECW2	protein_coding	34.2216	0.493329	0.172984	2.85188	0.00434614	0.077739
ENSG00000121210	KIAA0922	protein_coding	1898.68	0.376689	0.132164	2.85015	0.00436986	0.0780368
ENSG00000241163	LINC00877	lincRNA	761.229	0.38277	0.134319	2.84972	0.00437578	0.0780368
ENSG00000122679	RAMP3	protein_coding	1.04794	0.820565	0.288054	2.84865	0.00439047	NA
ENSG00000116711	PLA2G4A	protein_coding	173.983	0.438108	0.153892	2.84684	0.00441551	0.0786287
ENSG00000111249	CUX2	protein_coding	11.2242	-0.808331	0.284348	-2.84275	0.00447257	NA
ENSG00000130803	ZNF317	protein_coding	1031.08	-0.365354	0.128527	-2.84262	0.00447449	0.0795612
ENSG00000270277	RP11-65L3.2	antisense	5.0805	0.794496	0.279817	2.83934	0.00452064	NA
ENSG00000063169	GLTSCR1	protein_coding	470.56	-0.431229	0.151889	-2.83911	0.00452392	0.0802409
ENSG00000160404	TOR2A	protein_coding	1076.43	-0.329077	0.115915	-2.83896	0.00452607	0.0802409
ENSG00000241361	SLC25A24P1	transcribed_unprocessed_pseudogene	1.12031	0.742332	0.261837	2.83509	0.00458125	NA
ENSG00000263931	RP11-180P8.1	lincRNA	2.25036	-0.858114	0.3027	-2.83486	0.00458454	NA
ENSG00000089159	PXN	protein_coding	3650.63	-0.257809	0.0909469	-2.83472	0.00458665	0.0811952
ENSG00000154174	TOMM70A	protein_coding	687.12	-0.250451	0.0883769	-2.83389	0.00459848	0.0812848
ENSG00000135763	URB2	protein_coding	162.884	-0.331225	0.116958	-2.83199	0.00462593	0.0815038
ENSG00000144744	UBA3	protein_coding	1650.94	0.405222	0.143102	2.8317	0.00463019	0.0815038
ENSG00000274211	SOCS7	protein_coding	387.065	-0.437388	0.154465	-2.83163	0.00463121	0.0815038
ENSG00000079263	SP140	protein_coding	216.762	0.548505	0.193796	2.83032	0.0046501	0.0817167
ENSG00000207091	Y_RNA	misc_RNA	0.227556	0.555294	0.196222	2.82993	0.00465578	NA
ENSG00000166963	MAP1A	protein_coding	30.8995	-0.764486	0.270167	-2.82968	0.00465941	0.0817608
ENSG00000245848	CEBPA	protein_coding	906.834	-0.536616	0.189682	-2.82902	0.00466904	0.081799
ENSG00000064393	HIPK2	protein_coding	1930.23	-0.409361	0.144739	-2.82827	0.00467999	0.081799
ENSG00000163644	PPM1K	protein_coding	225.804	0.524039	0.185295	2.82814	0.004682	0.081799
ENSG00000143217	PVRL4	protein_coding	6.86554	-0.847976	0.299874	-2.82777	0.0046873	NA
ENSG00000170581	STAT2	protein_coding	4725.2	0.559584	0.197919	2.82735	0.00469355	0.0818816
ENSG00000253719	ATXN7L3B	protein_coding	1193.16	-0.264389	0.0935835	-2.82516	0.00472566	0.0823224
ENSG00000148090	AUH	protein_coding	162.392	0.274125	0.0970597	2.82429	0.00473852	0.082427
ENSG00000002726	AOC1	protein_coding	11.3493	-0.8202	0.290505	-2.82336	0.0047523	NA
ENSG00000272666	CTA-384D8.35	lincRNA	26.5562	0.731124	0.258961	2.8233	0.00475325	0.0825637
ENSG00000207171	SNORA51	snoRNA	0.854686	0.79552	0.281801	2.82299	0.00475781	NA
ENSG00000167658	EEF2	protein_coding	54585.1	-0.421247	0.149246	-2.8225	0.00476502	0.0826487
ENSG00000066827	ZFAT	protein_coding	195.819	-0.288019	0.10207	-2.82177	0.00477598	0.0827173
ENSG00000065150	IPO5	protein_coding	1739.21	-0.309858	0.109828	-2.82131	0.00478274	0.0827173
ENSG00000158156	XKR8	protein_coding	844.804	-0.479728	0.170092	-2.8204	0.0047964	0.0827926
ENSG00000212916	MAP10	protein_coding	64.2254	-0.534513	0.189537	-2.8201	0.00480087	0.0827926
ENSG00000275647	RP11-209D20.2	processed_pseudogene	3.36402	0.855408	0.303328	2.82008	0.00480119	NA
ENSG00000165071	TMEM71	protein_coding	2589.94	0.427361	0.151598	2.81904	0.0048168	0.0829483
ENSG00000198833	UBE2J1	protein_coding	4804.78	0.456466	0.162028	2.8172	0.00484439	0.083193
ENSG00000063978	RNF4	protein_coding	1257.82	-0.259566	0.0921389	-2.81712	0.00484562	0.083193
ENSG00000197782	ZNF780A	protein_coding	81.8184	0.699178	0.248225	2.81671	0.00485177	0.083193
ENSG00000119321	FKBP15	protein_coding	3930.71	0.282186	0.100223	2.81558	0.0048689	0.0833679
ENSG00000126062	TMEM115	protein_coding	344.682	-0.346148	0.122996	-2.81429	0.00488845	0.0834884
ENSG00000196507	TCEAL3	protein_coding	128.138	-0.340434	0.12097	-2.8142	0.00488984	0.0834884
ENSG00000088256	GNA11	protein_coding	131.076	-0.469435	0.166844	-2.81361	0.00489883	0.0835233
ENSG00000116903	EXOC8	protein_coding	613.77	-0.360979	0.128357	-2.81229	0.00491898	0.0836677
ENSG00000103512	NOMO1	protein_coding	458.602	-0.335639	0.119361	-2.81196	0.00492403	0.0836677
ENSG00000113522	RAD50	protein_coding	542.277	0.367461	0.130703	2.81143	0.00493224	0.0836677
ENSG00000124422	USP22	protein_coding	2091.28	-0.332057	0.118118	-2.81124	0.00493514	0.0836677
ENSG00000172845	SP3	protein_coding	4704.26	-0.314914	0.112056	-2.81033	0.00494905	0.0837853
ENSG00000131725	WDR44	protein_coding	487.089	0.242467	0.0863101	2.80925	0.00496568	0.0838702
ENSG00000166326	TRIM44	protein_coding	3333.6	0.172751	0.0614969	2.8091	0.00496802	0.0838702
ENSG00000260114	CTD-2574D22.4	sense_intronic	20.144	0.55117	0.196229	2.80881	0.00497248	NA
ENSG00000082074	FYB	protein_coding	10487.8	0.376512	0.134061	2.8085	0.00497722	0.0838993
ENSG00000160877	NACC1	protein_coding	845.099	-0.393796	0.14025	-2.80781	0.00498798	0.0838993
ENSG00000104267	CA2	protein_coding	195.712	0.516132	0.183832	2.80763	0.00499068	0.0838993
ENSG00000213965	NUDT19	protein_coding	406.26	-0.351783	0.125319	-2.8071	0.00499896	0.083921
ENSG00000126767	ELK1	protein_coding	754.737	-0.346829	0.123608	-2.80588	0.00501789	0.084018
ENSG00000107317	PTGDS	protein_coding	48.9603	-0.808742	0.288252	-2.80568	0.00502111	0.084018
ENSG00000157933	SKI	protein_coding	1546.23	-0.409581	0.145998	-2.80538	0.0050257	0.084018
ENSG00000213859	KCTD11	protein_coding	133.586	-0.436844	0.155798	-2.80391	0.00504876	0.0841739
ENSG00000112146	FBXO9	protein_coding	1688.47	0.232841	0.0830422	2.80389	0.00504904	0.0841739
ENSG00000161013	MGAT4B	protein_coding	1561.57	-0.29618	0.105657	-2.80323	0.00505931	0.0842284
ENSG00000179295	PTPN11	protein_coding	2061.81	-0.216276	0.0771789	-2.80227	0.0050744	0.0842952
ENSG00000128185	DGCR6L	protein_coding	477.848	-0.40085	0.143054	-2.80209	0.00507735	0.0842952
ENSG00000162702	ZNF281	protein_coding	1490.02	-0.435917	0.155612	-2.8013	0.00508969	0.0843836
ENSG00000197380	DACT3	protein_coding	11.7964	-0.824887	0.294726	-2.79883	0.00512879	NA
ENSG00000179038	RP11-157K17.5	transcribed_processed_pseudogene	5.77602	0.813024	0.290551	2.79822	0.00513855	NA
ENSG00000017260	ATP2C1	protein_coding	1157.77	0.186745	0.066788	2.79609	0.00517254	0.0855843
ENSG00000169905	TOR1AIP2	protein_coding	709.137	-0.301764	0.107933	-2.79585	0.00517635	0.0855843
ENSG00000149115	TNKS1BP1	protein_coding	100.351	-0.522703	0.187001	-2.79518	0.00518702	0.0856428
ENSG00000152932	RAB3C	protein_coding	2.64361	0.839693	0.300454	2.79475	0.00519399	NA
ENSG00000176946	THAP4	protein_coding	558.08	-0.374566	0.134069	-2.79383	0.00520873	0.0858833
ENSG00000101152	DNAJC5	protein_coding	3261.51	-0.264503	0.094699	-2.79309	0.00522077	0.0859249
ENSG00000125352	RNF113A	protein_coding	238.32	-0.347318	0.124362	-2.79279	0.00522555	0.0859249
ENSG00000023330	ALAS1	protein_coding	605.222	0.396682	0.142075	2.79206	0.00523729	0.0860003
ENSG00000149091	DGKZ	protein_coding	3736.29	-0.249354	0.0894166	-2.78867	0.00529245	0.0867876
ENSG00000111801	BTN3A3	protein_coding	1149.27	0.354612	0.127199	2.78784	0.00530602	0.0868154
ENSG00000134480	CCNH	protein_coding	714.753	0.433924	0.155657	2.78769	0.0053086	0.0868154
ENSG00000110002	VWA5A	protein_coding	221.982	0.407606	0.146276	2.78655	0.00532729	0.0868193
ENSG00000238113	LINC01410	lincRNA	330.177	0.65431	0.234836	2.78624	0.00533234	0.0868193
ENSG00000174151	CYB561D1	protein_coding	306.176	-0.518741	0.186197	-2.78598	0.00533665	0.0868193
ENSG00000187741	FANCA	protein_coding	125.032	0.355192	0.127496	2.78591	0.00533773	0.0868193
ENSG00000171970	ZNF57	protein_coding	30.2146	-0.620523	0.222856	-2.78441	0.00536251	0.0871046
ENSG00000207086	Y_RNA	misc_RNA	0.59603	0.696616	0.250222	2.78399	0.00536952	NA
ENSG00000183826	BTBD9	protein_coding	415.362	-0.342397	0.123031	-2.78301	0.00538569	0.0873629
ENSG00000081237	PTPRC	protein_coding	37979.2	0.303357	0.109077	2.78112	0.00541713	0.0877546
ENSG00000134830	C5AR2	protein_coding	687.038	0.50911	0.183105	2.78043	0.00542878	0.0877731
ENSG00000132382	MYBBP1A	protein_coding	424.605	-0.386793	0.139125	-2.78018	0.00543287	0.0877731
ENSG00000065923	SLC9A7	protein_coding	186.926	-0.446068	0.160527	-2.77877	0.00545645	0.0880357
ENSG00000011454	RABGAP1	protein_coding	747.112	0.240362	0.0865371	2.77756	0.00547685	0.0881607
ENSG00000010803	SCMH1	protein_coding	197.268	-0.267533	0.0963235	-2.77744	0.00547887	0.0881607
ENSG00000099992	TBC1D10A	protein_coding	317.951	-0.313222	0.11284	-2.7758	0.00550663	0.0884889
ENSG00000271952	RP11-245G13.2	lincRNA	3.17988	0.819323	0.295269	2.77483	0.005523	NA
ENSG00000175198	PCCA	protein_coding	213.035	-0.312878	0.112775	-2.77435	0.00553113	0.0887639
ENSG00000183307	CECR6	protein_coding	322.972	-0.576818	0.208173	-2.77085	0.00559094	0.0896041
ENSG00000154252	GAL3ST2	protein_coding	3.72507	0.744063	0.268578	2.77038	0.00559906	NA
ENSG00000130559	CAMSAP1	protein_coding	998.596	-0.345351	0.124721	-2.76899	0.00562302	0.089945
ENSG00000173559	NABP1	protein_coding	1069.93	0.620173	0.224021	2.76838	0.00563362	0.089945
ENSG00000108219	TSPAN14	protein_coding	5637.42	-0.334854	0.12096	-2.76832	0.00563466	0.089945
ENSG00000255348	RP11-700F16.3	antisense	0.572138	-0.725372	0.262078	-2.76777	0.00564406	NA
ENSG00000138756	BMP2K	protein_coding	697.382	0.272693	0.0985567	2.76686	0.00565988	0.0902278
ENSG00000224747	AP001065.7	processed_pseudogene	0.941555	0.794669	0.287313	2.76587	0.0056772	NA
ENSG00000070031	SCT	protein_coding	5.89478	-0.835599	0.30217	-2.76533	0.00568654	NA
ENSG00000102854	MSLN	protein_coding	7.46432	-0.828237	0.299582	-2.76464	0.00569851	NA
ENSG00000211751	TRBV25-1	TR_V_gene	0.470065	0.649883	0.235087	2.76444	0.00570213	NA
ENSG00000163481	RNF25	protein_coding	205.255	-0.288243	0.104373	-2.76165	0.00575098	0.0915587
ENSG00000203872	C6orf163	protein_coding	7.52571	0.77059	0.279224	2.75976	0.0057844	NA
ENSG00000143498	TAF1A	protein_coding	30.0741	0.639251	0.231665	2.75938	0.00579115	0.0918063
ENSG00000229980	TOB1-AS1	processed_transcript	6.96248	0.681449	0.246995	2.75896	0.00579864	NA
ENSG00000198001	IRAK4	protein_coding	1072.8	0.270231	0.0979546	2.75874	0.00580244	0.0918063
ENSG00000142544	CTU1	protein_coding	70.3599	-0.519485	0.188356	-2.75799	0.00581578	0.0918063
ENSG00000273015	LINC00938	lincRNA	419.864	-0.316613	0.1148	-2.75796	0.00581642	0.0918063
ENSG00000185798	WDR53	protein_coding	107.345	-0.283747	0.102886	-2.75788	0.00581772	0.0918063
ENSG00000174175	SELP	protein_coding	33.1987	0.614966	0.222986	2.75787	0.00581793	0.0918063
ENSG00000125124	BBS2	protein_coding	430.985	0.449117	0.162934	2.75643	0.00584365	0.0918063
ENSG00000116138	DNAJC16	protein_coding	268.197	0.313296	0.113663	2.75637	0.0058447	0.0918063
ENSG00000173530	TNFRSF10D	protein_coding	561.012	-0.563699	0.204542	-2.75591	0.005853	0.0918063
ENSG00000119396	RAB14	protein_coding	2215.63	-0.187426	0.0680169	-2.75557	0.00585895	0.0918063
ENSG00000115904	SOS1	protein_coding	1048.23	0.426341	0.154777	2.75455	0.00587721	0.0918063
ENSG00000173581	CCDC106	protein_coding	72.1787	-0.508827	0.18475	-2.75414	0.00588465	0.0918063
ENSG00000112130	RNF8	protein_coding	141.834	0.379822	0.137936	2.75361	0.00589414	0.0918063
ENSG00000178935	ZNF552	protein_coding	91.3626	-0.446541	0.162193	-2.75314	0.00590258	0.0918063
ENSG00000205758	CRYZL1	protein_coding	379.471	0.242391	0.0880453	2.75303	0.00590466	0.0918063
ENSG00000053372	MRTO4	protein_coding	278.418	-0.295233	0.107241	-2.75298	0.0059056	0.0918063
ENSG00000124813	RUNX2	protein_coding	436.182	-0.422815	0.15359	-2.75288	0.0059073	0.0918063
ENSG00000225434	LINC01504	lincRNA	89.7756	0.460595	0.167373	2.75192	0.00592477	0.0918063
ENSG00000185298	CCDC137	protein_coding	264.207	-0.29502	0.107209	-2.75183	0.00592624	0.0918063
ENSG00000167186	COQ7	protein_coding	211.785	0.306156	0.111256	2.75181	0.00592668	0.0918063
ENSG00000173198	CYSLTR1	protein_coding	1025.13	0.506848	0.184188	2.7518	0.00592693	0.0918063
ENSG00000167851	CD300A	protein_coding	2968.11	0.465305	0.169122	2.7513	0.00593599	0.0918283
ENSG00000110721	CHKA	protein_coding	297.262	-0.547839	0.199172	-2.75058	0.00594894	0.0918337
ENSG00000120860	CCDC53	protein_coding	364.315	0.428865	0.155926	2.75044	0.00595162	0.0918337
ENSG00000115310	RTN4	protein_coding	6682.49	0.248487	0.0904983	2.74576	0.00603701	0.0928907
ENSG00000136802	LRRC8A	protein_coding	684.99	-0.472702	0.172163	-2.74567	0.00603872	0.0928907
ENSG00000279805	CTA-212A2.1	TEC	55.6758	0.443833	0.161663	2.74542	0.00604331	0.0928907
ENSG00000034152	MAP2K3	protein_coding	3693.66	-0.402803	0.14679	-2.74408	0.00606816	0.0931537
ENSG00000189227	C15orf61	protein_coding	51.3912	-0.394859	0.143944	-2.74314	0.00608553	0.0932226
ENSG00000140623	SEPT12	protein_coding	2.21851	-0.809257	0.295025	-2.74301	0.00608784	NA
ENSG00000177917	ARL6IP6	protein_coding	536.035	0.329073	0.119986	2.7426	0.0060955	0.0932226
ENSG00000236833	AC024560.2	lincRNA	0.667871	0.739382	0.269593	2.74258	0.00609584	NA
ENSG00000136718	IMP4	protein_coding	633.047	-0.2523	0.0919936	-2.74258	0.00609592	0.0932226
ENSG00000226435	ANKRD18DP	transcribed_unprocessed_pseudogene	1.70631	0.807979	0.294656	2.74211	0.00610466	NA
ENSG00000160991	ORAI2	protein_coding	2153.64	-0.359715	0.131187	-2.74199	0.00610679	0.0932702
ENSG00000053900	ANAPC4	protein_coding	554.347	0.461537	0.168362	2.74133	0.0061191	0.0933395
ENSG00000279597	RP4-566L20.1	lincRNA	0.54136	0.59631	0.217545	2.74108	0.00612372	NA
ENSG00000246731	MGC16275	antisense	47.8421	0.562428	0.205198	2.7409	0.00612719	0.0933446
ENSG00000119041	GTF3C3	protein_coding	522.841	0.250635	0.0914952	2.73932	0.00615661	0.0934826
ENSG00000145246	ATP10D	protein_coding	758.095	0.372043	0.135822	2.7392	0.00615881	0.0934826
ENSG00000137500	CCDC90B	protein_coding	508.045	0.34161	0.124713	2.73916	0.00615958	0.0934826
ENSG00000250548	RP11-47I22.2	lincRNA	7.40015	0.696271	0.254192	2.73916	0.00615966	NA
ENSG00000213186	TRIM59	protein_coding	59.6475	-0.465752	0.170107	-2.73799	0.00618166	0.0935954
ENSG00000108679	LGALS3BP	protein_coding	871.467	0.829968	0.303181	2.73753	0.00619017	0.0935954
ENSG00000196378	ZNF34	protein_coding	171.604	-0.328541	0.120014	-2.73752	0.00619038	0.0935954
ENSG00000185347	C14orf80	protein_coding	302.035	0.607638	0.222128	2.73554	0.00622786	0.0939362
ENSG00000101444	AHCY	protein_coding	1141.41	-0.338644	0.123796	-2.7355	0.00622855	0.0939362
ENSG00000162910	MRPL55	protein_coding	356.505	-0.328246	0.120021	-2.73492	0.00623963	0.0939444
ENSG00000105699	LSR	protein_coding	18.393	0.666834	0.243839	2.73473	0.00624316	NA
ENSG00000124786	SLC35B3	protein_coding	295.179	0.341308	0.124822	2.73436	0.00625015	0.0939444
ENSG00000140391	TSPAN3	protein_coding	1195.35	-0.273206	0.0999206	-2.73423	0.00625254	0.0939444
ENSG00000100365	NCF4	protein_coding	2547.57	0.294625	0.107816	2.73266	0.00628254	0.0942773
ENSG00000125912	NCLN	protein_coding	1516.82	-0.327834	0.11999	-2.73218	0.00629171	0.0942973
ENSG00000064989	CALCRL	protein_coding	125.299	0.453773	0.166152	2.73107	0.00631293	0.0944257
ENSG00000155363	MOV10	protein_coding	643.124	0.526997	0.192975	2.73091	0.00631599	0.0944257
ENSG00000136231	IGF2BP3	protein_coding	46.1877	0.614263	0.224974	2.73038	0.00632622	0.094461
ENSG00000174695	TMEM167A	protein_coding	5242.58	0.274291	0.100475	2.72994	0.00633454	0.0944679
ENSG00000160602	NEK8	protein_coding	110.751	0.344339	0.126235	2.72776	0.0063766	0.0948747
ENSG00000128059	PPAT	protein_coding	50.6115	-0.446632	0.163739	-2.72771	0.0063776	0.0948747
ENSG00000091039	OSBPL8	protein_coding	5098.78	0.384725	0.141116	2.7263	0.00640483	0.0949616
ENSG00000130338	TULP4	protein_coding	431.676	-0.34218	0.125516	-2.72619	0.00640699	0.0949616
ENSG00000110108	TMEM109	protein_coding	1378.71	-0.398914	0.146336	-2.72601	0.00641041	0.0949616
ENSG00000105053	VRK3	protein_coding	630.944	0.28665	0.105165	2.72571	0.00641635	0.0949616
ENSG00000139620	KANSL2	protein_coding	690.57	-0.441216	0.161916	-2.72497	0.00643071	0.0949616
ENSG00000148634	HERC4	protein_coding	759.083	0.429068	0.157458	2.72496	0.00643085	0.0949616
ENSG00000185222	WBP5	protein_coding	15.5886	0.559045	0.205312	2.7229	0.00647107	NA
ENSG00000139146	FAM60A	protein_coding	802.721	-0.281465	0.103426	-2.72141	0.00650032	0.0958697
ENSG00000170275	CRTAP	protein_coding	8418.14	-0.338981	0.124624	-2.72003	0.00652761	0.0961543
ENSG00000271105	SCML2P2	processed_pseudogene	1.00575	0.793854	0.291879	2.71981	0.00653202	NA
ENSG00000088899	LZTS3	protein_coding	21.3532	-0.641698	0.235974	-2.71936	0.00654078	NA
ENSG00000078081	LAMP3	protein_coding	5.86591	0.811191	0.29835	2.71893	0.00654941	NA
ENSG00000215367	TMED11P	unitary_pseudogene	0.68311	0.746505	0.274587	2.71865	0.00655492	NA
ENSG00000174010	KLHL15	protein_coding	1276.79	-0.372076	0.136862	-2.71863	0.00655537	0.096445
ENSG00000099385	BCL7C	protein_coding	233.728	-0.296174	0.108974	-2.71784	0.00657096	0.0965562
ENSG00000167325	RRM1	protein_coding	213.088	0.317493	0.116842	2.71728	0.00658203	0.0966007
ENSG00000152784	PRDM8	protein_coding	65.7199	0.748105	0.275421	2.71622	0.00660321	0.0967934
ENSG00000053918	KCNQ1	protein_coding	2286.01	-0.356602	0.131357	-2.71475	0.00663261	0.0971059
ENSG00000254893	RP11-466P24.2	processed_pseudogene	2.45583	-0.80803	0.297655	-2.71465	0.00663461	NA
ENSG00000226964	RHEBP2	processed_pseudogene	5.58374	0.729691	0.2688	2.71463	0.00663508	NA
ENSG00000242767	ZBTB20-AS4	lincRNA	0.507127	0.657048	0.242342	2.71124	0.00670314	NA
ENSG00000111913	FAM65B	protein_coding	7372.47	0.442792	0.163412	2.70966	0.00673513	0.098399
ENSG00000110717	NDUFS8	protein_coding	583.224	-0.319767	0.118015	-2.70956	0.0067373	0.098399
ENSG00000205837	LINC00487	lincRNA	3.04193	0.746143	0.275483	2.70849	0.00675893	NA
ENSG00000214413	BBIP1	protein_coding	296.34	0.303514	0.112081	2.70798	0.00676941	0.098639
ENSG00000104129	DNAJC17	protein_coding	160.75	0.255461	0.0943384	2.70793	0.00677053	0.098639
ENSG00000141858	SAMD1	protein_coding	426.157	-0.424766	0.156882	-2.70754	0.00677836	0.098639
ENSG00000130748	TMEM160	protein_coding	286.772	-0.426811	0.157679	-2.70683	0.00679297	0.0987322
ENSG00000176371	ZSCAN2	protein_coding	59.5067	-0.468932	0.173329	-2.70544	0.00682137	0.0989572
ENSG00000229677	RP11-383F6.1	processed_pseudogene	3.93509	0.813915	0.300876	2.70515	0.0068273	NA
ENSG00000198888	MT-ND1	protein_coding	29297	-0.440215	0.162734	-2.70512	0.00682798	0.0989572
ENSG00000274536	MIR223	antisense	783.159	0.403185	0.149059	2.70487	0.00683315	0.0989572
ENSG00000272391	POM121C	protein_coding	1015.67	-0.360733	0.133462	-2.70289	0.0068739	0.0994275
ENSG00000178199	ZC3H12D	protein_coding	114.552	0.541762	0.200504	2.702	0.00689243	0.0994621
ENSG00000175895	PLEKHF2	protein_coding	1651.68	-0.372936	0.138037	-2.70171	0.00689842	0.0994621
ENSG00000279963	AL049872.1	protein_coding	1.35756	0.803583	0.297442	2.70164	0.00689977	NA
ENSG00000111961	SASH1	protein_coding	849.394	0.574803	0.212766	2.70158	0.00690111	0.0994621
ENSG00000180425	C11orf71	protein_coding	77.0491	0.416621	0.154267	2.70064	0.00692053	0.0996224
ENSG00000159461	AMFR	protein_coding	2203.27	-0.361601	0.133984	-2.69883	0.00695836	0.100047
ENSG00000175265	GOLGA8A	protein_coding	59.0842	0.817317	0.303006	2.69737	0.00698903	0.100362
ENSG00000197928	ZNF677	protein_coding	33.9289	0.472248	0.175102	2.69699	0.00699697	0.100362
ENSG00000096384	HSP90AB1	protein_coding	8135.39	-0.280039	0.103874	-2.69595	0.00701874	0.100528
ENSG00000161847	RAVER1	protein_coding	497.893	-0.391386	0.1452	-2.6955	0.00702838	0.100528
ENSG00000133059	DSTYK	protein_coding	680.335	-0.334156	0.123979	-2.69525	0.00703362	0.100528
ENSG00000102524	TNFSF13B	protein_coding	5927.34	0.372729	0.138312	2.69485	0.00704208	0.10053
ENSG00000163219	ARHGAP25	protein_coding	1074.94	0.242688	0.09009	2.69384	0.00706336	0.100648
ENSG00000107872	FBXL15	protein_coding	296.596	-0.358708	0.133167	-2.69366	0.00706712	0.100648
ENSG00000254500	RANP3	processed_pseudogene	3.51155	0.79365	0.294699	2.69308	0.00707942	NA
ENSG00000136819	C9orf78	protein_coding	1651.25	-0.230067	0.0855136	-2.69041	0.00713647	0.101515
ENSG00000162775	RBM15	protein_coding	515.127	-0.367389	0.136621	-2.68911	0.00716428	0.10179
ENSG00000184956	MUC6	protein_coding	2.94948	0.812239	0.302111	2.68854	0.00717646	NA
ENSG00000128050	PAICS	protein_coding	286.113	-0.277571	0.103271	-2.68778	0.00719284	0.102075
ENSG00000102531	FNDC3A	protein_coding	1324.62	0.322608	0.120052	2.68724	0.00720461	0.102122
ENSG00000198081	ZBTB14	protein_coding	518.037	-0.237701	0.0885438	-2.68456	0.00726262	0.102823
ENSG00000049618	ARID1B	protein_coding	1786.54	-0.202397	0.075406	-2.6841	0.00727259	0.102843
ENSG00000174004	NRROS	protein_coding	2681.54	-0.474946	0.177009	-2.68318	0.0072926	0.1029
ENSG00000010818	HIVEP2	protein_coding	342.778	0.520787	0.194097	2.68313	0.00729372	0.1029
ENSG00000173065	FAM222B	protein_coding	119.645	-0.299248	0.111565	-2.68228	0.00731225	0.10304
ENSG00000196867	ZFP28	protein_coding	27.5663	0.480532	0.17918	2.68184	0.00732184	0.103054
ENSG00000163050	ADCK3	protein_coding	1093.51	-0.349914	0.130507	-2.68119	0.00733615	0.103061
ENSG00000155657	TTN	protein_coding	244.429	0.597454	0.222844	2.68104	0.00733945	0.103061
ENSG00000165462	PHOX2A	protein_coding	0.283624	-0.540769	0.201747	-2.68043	0.00735285	NA
ENSG00000168101	NUDT16L1	protein_coding	505.775	-0.258953	0.0966151	-2.68026	0.00735652	0.10318
ENSG00000102699	PARP4	protein_coding	2853.04	0.378031	0.141088	2.67939	0.0073757	0.103289
ENSG00000150637	CD226	protein_coding	85.111	0.519263	0.193839	2.67884	0.00738769	0.103289
ENSG00000133114	GPALPP1	protein_coding	285.562	0.270088	0.100827	2.67874	0.00739006	0.103289
ENSG00000170364	SETMAR	protein_coding	117.414	-0.300456	0.112213	-2.67756	0.00741609	0.103484
ENSG00000075303	SLC25A40	protein_coding	841.772	0.401739	0.150052	2.67733	0.0074212	0.103484
ENSG00000197381	ADARB1	protein_coding	166.958	0.464659	0.173607	2.67649	0.00743968	0.103621
ENSG00000134698	38200	protein_coding	5017.38	0.187846	0.070238	2.67442	0.00748597	0.104145
ENSG00000121073	SLC35B1	protein_coding	845.687	-0.25493	0.0953456	-2.67374	0.007501	0.104234
ENSG00000207980	MIR23A	miRNA	43.8898	0.78202	0.29256	2.67302	0.00751707	0.10429
ENSG00000259956	RBM15B	protein_coding	1929.73	-0.322156	0.120547	-2.67245	0.00753	0.10429
ENSG00000183955	SETD8	protein_coding	787.24	-0.29305	0.109664	-2.67225	0.00753434	0.10429
ENSG00000109586	GALNT7	protein_coding	755.648	0.365453	0.136771	2.67201	0.00753979	0.10429
ENSG00000206190	ATP10A	protein_coding	349.764	0.68121	0.255024	2.67116	0.00755894	0.104435
ENSG00000247317	RP11-273G15.2	lincRNA	5.98067	0.791763	0.29649	2.67045	0.00757487	NA
ENSG00000167792	NDUFV1	protein_coding	1337.02	-0.194513	0.0728416	-2.67036	0.0075771	0.104566
ENSG00000273628	RP11-756A22.7	unprocessed_pseudogene	2.10485	0.808325	0.30276	2.66985	0.00758846	NA
ENSG00000232748	RP11-196G11.6	lincRNA	33.769	-0.490275	0.183762	-2.66799	0.00763073	0.105185
ENSG00000040341	STAU2	protein_coding	411.148	0.299033	0.112111	2.6673	0.00764635	0.10528
ENSG00000144559	TAMM41	protein_coding	101.903	0.375266	0.140866	2.664	0.00772183	0.106182
ENSG00000074935	TUBE1	protein_coding	77.9222	0.446155	0.167497	2.66366	0.00772952	0.106182
ENSG00000205707	LYRM5	protein_coding	212.811	0.304063	0.114195	2.66266	0.00775249	0.106276
ENSG00000112033	PPARD	protein_coding	451.637	-0.260691	0.0979087	-2.66259	0.00775411	0.106276
ENSG00000223387	RP11-408H1.3	lincRNA	2.11423	0.788382	0.296103	2.66253	0.00775562	NA
ENSG00000165533	TTC8	protein_coding	44.1368	0.425621	0.159884	2.66207	0.00776621	0.106321
ENSG00000172534	HCFC1	protein_coding	1958.44	-0.327839	0.123222	-2.66054	0.00780146	0.106682
ENSG00000271428	RP1-224A6.8	processed_pseudogene	2.38895	0.805905	0.302919	2.66047	0.00780328	NA
ENSG00000117593	DARS2	protein_coding	170.557	0.4405	0.165637	2.65944	0.00782713	0.106797
ENSG00000176641	RNF152	protein_coding	86.6218	0.807426	0.303643	2.65913	0.00783436	0.106797
ENSG00000146085	MUT	protein_coding	253.342	0.350831	0.131939	2.65903	0.00783653	0.106797
ENSG00000042317	SPATA7	protein_coding	56.0394	0.402999	0.151591	2.65847	0.00784969	0.106855
ENSG00000204619	PPP1R11	protein_coding	1410.47	0.332395	0.125144	2.65609	0.00790523	0.10749
ENSG00000133606	MKRN1	protein_coding	4949.59	-0.225053	0.0847533	-2.65539	0.00792171	0.107501
ENSG00000256269	HMBS	protein_coding	244.344	-0.344765	0.129841	-2.65529	0.00792398	0.107501
ENSG00000106624	AEBP1	protein_coding	12.5029	-0.773864	0.291445	-2.65527	0.00792451	NA
ENSG00000160799	CCDC12	protein_coding	787.22	-0.279148	0.105147	-2.65482	0.00793501	0.10753
ENSG00000274245	RP11-357P18.2	lincRNA	21.2788	0.787562	0.296812	2.65341	0.00796839	NA
ENSG00000130332	LSM7	protein_coding	563.787	-0.246849	0.0930791	-2.65204	0.00800075	0.108298
ENSG00000039319	ZFYVE16	protein_coding	1020.09	0.362651	0.136815	2.65066	0.0080335	0.108619
ENSG00000260269	CTD-2323K18.1	processed_transcript	3.94003	0.730604	0.27587	2.64836	0.00808836	NA
ENSG00000132196	HSD17B7	protein_coding	83.9198	0.44611	0.168481	2.64784	0.00810085	0.109387
ENSG00000198925	ATG9A	protein_coding	881.061	-0.263731	0.0996159	-2.64747	0.00810955	0.109387
ENSG00000105085	MED26	protein_coding	166.268	-0.441925	0.166944	-2.64714	0.00811755	0.109387
ENSG00000174013	FBXO45	protein_coding	308.719	-0.269642	0.101892	-2.64635	0.00813647	0.109426
ENSG00000181523	SGSH	protein_coding	1759	-0.370718	0.140091	-2.64626	0.00813868	0.109426
ENSG00000253669	KB-1732A1.1	lincRNA	22.6185	0.65618	0.248069	2.64515	0.00816558	NA
ENSG00000257599	OVCH1-AS1	antisense	8.14188	-0.734481	0.277715	-2.64473	0.00817551	NA
ENSG00000079616	KIF22	protein_coding	236.608	-0.295378	0.111726	-2.64377	0.00819887	0.110076
ENSG00000111224	PARP11	protein_coding	293.201	0.390727	0.147825	2.64318	0.00821319	0.110076
ENSG00000140043	PTGR2	protein_coding	36.6745	0.471848	0.178527	2.643	0.00821746	0.110076
ENSG00000165660	FAM175B	protein_coding	477.468	-0.272811	0.10323	-2.64275	0.00822363	0.110076
ENSG00000176095	IP6K1	protein_coding	779.506	-0.258362	0.0978073	-2.64154	0.008253	0.110318
ENSG00000176978	DPP7	protein_coding	2544.8	-0.309214	0.11709	-2.64081	0.00827072	0.110318
ENSG00000198223	CSF2RA	protein_coding	1829.47	0.322482	0.122134	2.64039	0.00828114	0.110318
ENSG00000090372	STRN4	protein_coding	2659.15	-0.242411	0.0918253	-2.63992	0.00829253	0.110318
ENSG00000127838	PNKD	protein_coding	2111.92	-0.408872	0.154898	-2.63963	0.00829975	0.110318
ENSG00000004660	CAMKK1	protein_coding	364.841	-0.434917	0.164771	-2.63953	0.00830223	0.110318
ENSG00000158411	MITD1	protein_coding	355.791	0.444973	0.16859	2.63937	0.00830595	0.110318
ENSG00000188070	C11orf95	protein_coding	133.49	-0.393363	0.14909	-2.63843	0.00832906	0.110503
ENSG00000184939	ZFP90	protein_coding	254.546	0.318652	0.120803	2.63778	0.00834519	0.110595
ENSG00000139974	SLC38A6	protein_coding	126.093	0.31228	0.118422	2.63701	0.00836396	0.110721
ENSG00000121067	SPOP	protein_coding	923.211	0.311413	0.118114	2.63654	0.00837556	0.110753
ENSG00000272325	NUDT3	protein_coding	740.182	-0.153898	0.0583999	-2.63525	0.00840756	0.110907
ENSG00000152454	ZNF256	protein_coding	41.7891	-0.588719	0.223424	-2.63499	0.00841406	0.110907
ENSG00000077721	UBE2A	protein_coding	1534.82	0.20455	0.0776424	2.63451	0.00842579	0.110907
ENSG00000197024	ZNF398	protein_coding	330.856	-0.381333	0.144748	-2.63446	0.00842719	0.110907
ENSG00000205133	TRIQK	protein_coding	978.767	0.362622	0.137659	2.63421	0.00843335	0.110907
ENSG00000213090	AC007256.5	processed_pseudogene	15.0854	-0.51696	0.196331	-2.6331	0.00846093	NA
ENSG00000162600	OMA1	protein_coding	192.454	0.4193	0.159264	2.63273	0.00847009	0.111168
ENSG00000130520	LSM4	protein_coding	1160.55	-0.285791	0.108557	-2.63263	0.00847275	0.111168
ENSG00000164880	INTS1	protein_coding	2036.85	-0.275411	0.104628	-2.6323	0.00848095	0.111168
ENSG00000179222	MAGED1	protein_coding	182.039	-0.300413	0.114216	-2.63023	0.00853269	0.111542
ENSG00000155313	USP25	protein_coding	1878.22	0.232284	0.0883188	2.63006	0.00853689	0.111542
ENSG00000172273	HINFP	protein_coding	231.24	0.336574	0.127973	2.63005	0.00853733	0.111542
ENSG00000252942	RNA5SP290	rRNA	0.71519	-0.703935	0.267668	-2.62988	0.00854145	NA
ENSG00000126226	PCID2	protein_coding	518.054	0.309886	0.117875	2.62894	0.00856516	0.111784
ENSG00000260766	RP11-226L15.5	sense_overlapping	15.4686	0.693663	0.263968	2.62784	0.00859301	NA
ENSG00000102554	KLF5	protein_coding	247.493	0.797961	0.303738	2.62714	0.00861062	0.112089
ENSG00000163319	MRPS18C	protein_coding	105.063	0.38378	0.146098	2.62687	0.00861754	0.112089
ENSG00000181804	SLC9A9	protein_coding	591.906	0.231897	0.0882875	2.62661	0.00862404	0.112089
ENSG00000084207	GSTP1	protein_coding	6416.49	-0.340502	0.129639	-2.62654	0.00862581	0.112089
ENSG00000172361	CCDC11	protein_coding	4.44347	-0.735088	0.279882	-2.62643	0.00862865	NA
ENSG00000258659	TRIM34	protein_coding	1.28405	0.76778	0.292438	2.62545	0.00865349	NA
ENSG00000096872	IFT74	protein_coding	125.243	0.337993	0.128749	2.62522	0.00865935	0.112403
ENSG00000233647	NENFP1	processed_pseudogene	1.38247	-0.789404	0.300767	-2.62463	0.0086742	NA
ENSG00000177485	ZBTB33	protein_coding	870.726	-0.340888	0.129899	-2.62426	0.00868384	0.1126
ENSG00000083635	NUFIP1	protein_coding	96.6629	-0.410878	0.156605	-2.62365	0.00869926	0.112678
ENSG00000203730	TEDDM1	protein_coding	0.676657	0.695942	0.265264	2.62358	0.00870106	NA
ENSG00000267277	CTD-2342J14.6	antisense	3.03623	-0.765709	0.291863	-2.62352	0.00870265	NA
ENSG00000087152	ATXN7L3	protein_coding	3097.58	-0.215967	0.0823483	-2.62261	0.008726	0.112903
ENSG00000233975	RP11-288L9.1	lincRNA	1.6712	0.792882	0.302449	2.62154	0.00875326	NA
ENSG00000107099	DOCK8	protein_coding	8852.81	0.241913	0.0922871	2.62131	0.00875922	0.113211
ENSG00000152455	SUV39H2	protein_coding	32.5127	0.420854	0.160671	2.61936	0.00880947	0.113738
ENSG00000255198	SNHG9	lincRNA	83.7209	-0.556229	0.212396	-2.61884	0.00882302	0.11379
ENSG00000123609	NMI	protein_coding	1303.68	0.449832	0.171866	2.61734	0.00886175	0.114051
ENSG00000188707	ZBED6CL	protein_coding	151.313	-0.486896	0.186038	-2.61718	0.00886585	0.114051
ENSG00000187866	FAM122A	protein_coding	315.163	-0.241579	0.0923224	-2.61669	0.00887865	0.114051
ENSG00000168612	ZSWIM1	protein_coding	139.081	-0.484747	0.185259	-2.61659	0.0088812	0.114051
ENSG00000127526	SLC35E1	protein_coding	929.476	-0.292183	0.111729	-2.61512	0.00891968	0.114423
ENSG00000273797	RP11-1046B16.3	sense_intronic	3.77593	0.757595	0.289702	2.61509	0.0089205	NA
ENSG00000141873	SLC39A3	protein_coding	319.589	-0.370934	0.141904	-2.61399	0.00894926	0.114658
ENSG00000137054	POLR1E	protein_coding	158.076	-0.318866	0.121998	-2.61369	0.00895705	0.114658
ENSG00000240489	SETP14	processed_pseudogene	0.410457	-0.628656	0.240552	-2.61339	0.00896494	NA
ENSG00000111215	PRR4	protein_coding	3.52551	0.771732	0.295321	2.6132	0.00896997	NA
ENSG00000121644	DESI2	protein_coding	633.883	-0.208269	0.0796993	-2.61318	0.00897043	0.114707
ENSG00000183935	HTR7P1	transcribed_processed_pseudogene	260.521	0.397021	0.151984	2.61226	0.00899463	0.11485
ENSG00000166188	ZNF319	protein_coding	434.805	-0.450593	0.172507	-2.61203	0.0090007	0.11485
ENSG00000186081	KRT5	protein_coding	20.6468	-0.789972	0.302493	-2.61153	0.00901369	NA
ENSG00000162614	NEXN	protein_coding	184.7	0.718306	0.275146	2.61064	0.0090373	0.115194
ENSG00000226904	RP11-561O23.8	antisense	1.53166	0.788528	0.302072	2.6104	0.00904364	NA
ENSG00000100201	DDX17	protein_coding	7823.13	0.454511	0.174138	2.61006	0.00905267	0.115268
ENSG00000044574	HSPA5	protein_coding	10537.4	-0.443413	0.169942	-2.6092	0.00907544	0.115379
ENSG00000243260	RN7SL558P	misc_RNA	0.848832	0.719357	0.275716	2.60905	0.00907937	NA
ENSG00000168564	CDKN2AIP	protein_coding	255.023	-0.364468	0.139696	-2.609	0.0090806	0.115379
ENSG00000130449	ZSWIM6	protein_coding	1964.97	0.302479	0.115969	2.60828	0.00909983	0.115417
ENSG00000260804	PKI55	lincRNA	19.2313	-0.568814	0.218108	-2.60794	0.00910877	NA
ENSG00000170412	GPRC5C	protein_coding	30.5134	0.694335	0.26625	2.60783	0.00911188	0.115417
ENSG00000156030	ELMSAN1	protein_coding	2492.21	-0.42035	0.161189	-2.60781	0.00911238	0.115417
ENSG00000272219	CTB-181H17.1	sense_intronic	1.52172	0.757046	0.290395	2.60696	0.0091351	NA
ENSG00000229419	RALGAPA1P	processed_pseudogene	10.1639	0.707972	0.271702	2.6057	0.00916874	NA
ENSG00000272902	RP11-299H21.1	lincRNA	14.0572	0.588499	0.226029	2.60365	0.00922382	NA
ENSG00000164073	MFSD8	protein_coding	148.802	0.414571	0.159239	2.60345	0.00922916	0.116773
ENSG00000150990	DHX37	protein_coding	458.395	-0.329215	0.126472	-2.60308	0.00923913	0.116776
ENSG00000238018	AC093110.3	antisense	1.53021	0.751321	0.288663	2.60276	0.00924765	NA
ENSG00000176102	CSTF3	protein_coding	183.617	0.337825	0.129806	2.60253	0.00925385	0.116789
ENSG00000242125	SNHG3	sense_intronic	501.985	-0.4184	0.160789	-2.60218	0.00926345	0.116789
ENSG00000175497	DPP10	protein_coding	0.699295	0.539355	0.207273	2.60215	0.00926408	NA
ENSG00000216197	AP001623.1	miRNA	2.68293	-0.790493	0.303788	-2.60212	0.00926497	NA
ENSG00000108448	TRIM16L	protein_coding	35.859	-0.456755	0.175543	-2.60196	0.00926928	0.116789
ENSG00000007376	RPUSD1	protein_coding	654.564	-0.32538	0.125109	-2.60076	0.00930162	0.117074
ENSG00000100599	RIN3	protein_coding	6503.47	-0.327968	0.126132	-2.60019	0.00931716	0.117147
ENSG00000232324	AC008440.10	lincRNA	8.82375	0.726423	0.279406	2.59988	0.00932558	NA
ENSG00000108590	MED31	protein_coding	52.1336	0.416954	0.160418	2.59918	0.00934479	0.117371
ENSG00000124772	CPNE5	protein_coding	20.199	0.695787	0.267729	2.59885	0.0093538	NA
ENSG00000142627	EPHA2	protein_coding	21.0415	-0.787205	0.302938	-2.59857	0.00936129	NA
ENSG00000167962	ZNF598	protein_coding	739.542	-0.360592	0.138907	-2.59591	0.00943402	0.118193
ENSG00000250903	GMDS-AS1	lincRNA	60.3574	0.282876	0.108975	2.5958	0.0094372	0.118193
ENSG00000110799	VWF	protein_coding	71.4094	-0.488095	0.188039	-2.59571	0.00943969	0.118193
ENSG00000188011	RTP5	protein_coding	1.39364	0.671185	0.258613	2.59532	0.00945024	NA
ENSG00000151694	ADAM17	protein_coding	1358.9	0.264039	0.101774	2.59437	0.00947656	0.118531
ENSG00000111725	PRKAB1	protein_coding	522.105	-0.178965	0.0689969	-2.59381	0.00949201	0.118601
ENSG00000166166	TRMT61A	protein_coding	247.207	-0.355245	0.136983	-2.59335	0.00950465	0.118635
ENSG00000146535	GNA12	protein_coding	1781.48	-0.456872	0.17623	-2.59247	0.00952881	0.118814
ENSG00000103269	RHBDL1	protein_coding	11.337	-0.711673	0.274527	-2.59236	0.00953187	NA
ENSG00000228300	C19orf24	protein_coding	499.081	-0.393425	0.15179	-2.59191	0.00954452	0.118886
ENSG00000119446	RBM18	protein_coding	697.66	-0.20829	0.0803984	-2.59072	0.0095775	0.119173
ENSG00000179632	MAF1	protein_coding	2370.54	-0.283118	0.109326	-2.58968	0.00960662	0.119412
ENSG00000187840	EIF4EBP1	protein_coding	955.638	-0.364809	0.140977	-2.58773	0.00966116	0.119918
ENSG00000135049	AGTPBP1	protein_coding	4176.16	0.265805	0.102726	2.58751	0.00966727	0.119918
ENSG00000231025	RP11-175O19.4	antisense	165.708	-0.285665	0.110429	-2.58686	0.00968558	0.11998
ENSG00000261236	BOP1	protein_coding	537.753	-0.33687	0.130271	-2.58591	0.00971219	0.11998
ENSG00000171490	RSL1D1	protein_coding	4116.66	-0.240978	0.0931959	-2.58572	0.00971767	0.11998
ENSG00000197858	GPAA1	protein_coding	1348.39	-0.333345	0.128923	-2.58562	0.00972052	0.11998
ENSG00000142089	IFITM3	protein_coding	4104.54	0.762717	0.294991	2.58556	0.0097222	0.11998
ENSG00000183625	CCR3	protein_coding	18.0575	0.773007	0.299091	2.58452	0.00975142	NA
ENSG00000104883	PEX11G	protein_coding	36.5962	0.470806	0.182227	2.58362	0.00977684	0.120531
ENSG00000254858	MPV17L2	protein_coding	150.768	-0.33891	0.131204	-2.58307	0.00979241	0.120599
ENSG00000187080	OR2AK2	protein_coding	0.233108	-0.477992	0.185104	-2.58229	0.00981459	NA
ENSG00000103056	SMPD3	protein_coding	91.5975	-0.519196	0.201078	-2.58206	0.00982122	0.120747
ENSG00000130723	PRRC2B	protein_coding	2467.59	-0.24094	0.0933202	-2.58187	0.00982671	0.120747
ENSG00000251073	NUDT19P5	processed_pseudogene	1.50781	0.725564	0.281025	2.58185	0.00982715	NA
ENSG00000129521	EGLN3	protein_coding	8.86838	-0.770814	0.298566	-2.58172	0.00983091	NA
ENSG00000179409	GEMIN4	protein_coding	434.145	-0.380915	0.14755	-2.58159	0.00983457	0.120747
ENSG00000253616	RP11-875O11.3	antisense	13.4535	0.663396	0.257049	2.58081	0.00985692	NA
ENSG00000026751	SLAMF7	protein_coding	671.689	0.681088	0.26391	2.58075	0.00985845	0.120802
ENSG00000036530	CYP46A1	protein_coding	5.01845	-0.703545	0.272638	-2.58051	0.00986558	NA
ENSG00000102312	PORCN	protein_coding	203.772	-0.288139	0.111662	-2.58047	0.00986673	0.120802
ENSG00000113300	CNOT6	protein_coding	936.148	0.293052	0.113569	2.58038	0.00986922	0.120802
ENSG00000112667	DNPH1	protein_coding	173.251	-0.405864	0.157421	-2.57821	0.0099315	0.121441
ENSG00000181016	LSMEM1	protein_coding	17.063	0.612401	0.23763	2.57712	0.00996288	NA
ENSG00000135597	REPS1	protein_coding	889.648	0.21797	0.0845884	2.57683	0.00997098	0.1218
ENSG00000068784	SRBD1	protein_coding	496.88	0.391444	0.151949	2.57615	0.0099908	0.121918
ENSG00000154813	DPH3	protein_coding	761.891	0.331562	0.128732	2.57561	0.0100064	0.121984
ENSG00000280297	ABBA01031664.1	protein_coding	4.70016	-0.777293	0.301832	-2.57525	0.0100168	NA
ENSG00000120519	SLC10A7	protein_coding	276.135	0.218562	0.0849177	2.57381	0.0100585	0.122318
ENSG00000135315	CEP162	protein_coding	188.429	0.471693	0.183267	2.57381	0.0100586	0.122318
ENSG00000083223	ZCCHC6	protein_coding	2395.7	0.354044	0.137585	2.57328	0.0100741	0.122318
ENSG00000114204	SERPINI2	protein_coding	24.47	0.737347	0.28657	2.57301	0.0100818	0.122318
ENSG00000154222	CC2D1B	protein_coding	612.666	0.260777	0.101355	2.57291	0.0100846	0.122318
ENSG00000249713	CTD-2236F14.1	antisense	0.911963	0.73445	0.285534	2.5722	0.0101056	NA
ENSG00000123384	LRP1	protein_coding	30826.9	-0.356485	0.138648	-2.57115	0.0101361	0.122776
ENSG00000007944	MYLIP	protein_coding	1319.68	-0.449239	0.174738	-2.57092	0.0101428	0.122776
ENSG00000178209	PLEC	protein_coding	16431.5	-0.385736	0.150108	-2.56973	0.0101779	0.123077
ENSG00000159069	FBXW5	protein_coding	2571	-0.313016	0.121843	-2.56901	0.0101989	0.123207
ENSG00000279377	AC003973.3	TEC	0.300443	-0.533086	0.207568	-2.56825	0.0102214	NA
ENSG00000105329	TGFB1	protein_coding	7408.81	-0.444434	0.173157	-2.56666	0.0102684	0.123922
ENSG00000228770	AC007327.6	processed_pseudogene	0.346424	0.491213	0.191415	2.56623	0.0102812	NA
ENSG00000177294	FBXO39	protein_coding	4.24383	0.778041	0.303252	2.56566	0.010298	NA
ENSG00000196584	XRCC2	protein_coding	4.50992	0.750339	0.292464	2.56558	0.0103003	NA
ENSG00000145439	CBR4	protein_coding	154.13	0.422937	0.164893	2.56491	0.0103202	0.124422
ENSG00000198931	APRT	protein_coding	1966.82	-0.330601	0.128936	-2.56407	0.0103452	0.124578
ENSG00000122390	NAA60	protein_coding	278.012	-0.326566	0.127393	-2.56345	0.0103638	0.124578
ENSG00000061987	MON2	protein_coding	1108.29	0.316184	0.123344	2.56343	0.0103642	0.124578
ENSG00000134198	TSPAN2	protein_coding	398.653	0.506538	0.197649	2.56281	0.0103828	0.124677
ENSG00000144306	SCRN3	protein_coding	217.613	0.321916	0.125659	2.56182	0.0104126	0.124909
ENSG00000105939	ZC3HAV1	protein_coding	1827.71	0.339442	0.132531	2.56122	0.0104306	0.124942
ENSG00000116793	PHTF1	protein_coding	236.604	0.218873	0.0854629	2.56103	0.0104361	0.124942
ENSG00000214113	LYRM4	protein_coding	299.884	-0.271958	0.106209	-2.5606	0.0104493	0.124976
ENSG00000230658	KLHL7-AS1	lincRNA	2.47774	0.774953	0.302661	2.56047	0.0104531	NA
ENSG00000254667	AP000783.1	transcribed_unprocessed_pseudogene	57.7564	-0.444995	0.173856	-2.55956	0.0104806	0.125226
ENSG00000168329	CX3CR1	protein_coding	3071.98	0.751553	0.293798	2.55806	0.0105258	0.125527
ENSG00000176058	TPRN	protein_coding	219.411	-0.360745	0.141025	-2.55803	0.0105267	0.125527
ENSG00000224420	ADM5	protein_coding	5.10502	-0.710352	0.27772	-2.5578	0.0105336	NA
ENSG00000169689	STRA13	protein_coding	302.674	-0.269808	0.105495	-2.55755	0.0105412	0.125576
ENSG00000178458	H3F3AP6	processed_pseudogene	6.66927	0.733378	0.28677	2.55737	0.0105467	NA
ENSG00000164168	TMEM184C	protein_coding	418.674	0.269067	0.105288	2.55553	0.0106026	0.126181
ENSG00000078967	UBE2D4	protein_coding	109.651	-0.307842	0.120494	-2.55483	0.010624	0.126311
ENSG00000070367	EXOC5	protein_coding	1227.81	0.315378	0.123487	2.55394	0.0106512	0.126464
ENSG00000086288	NME8	protein_coding	109.41	0.485377	0.190067	2.55372	0.0106579	0.126464
ENSG00000247934	RP11-967K21.1	antisense	5.68853	0.693548	0.27161	2.55347	0.0106656	NA
ENSG00000169583	CLIC3	protein_coding	14.4102	-0.713566	0.27947	-2.55328	0.0106714	NA
ENSG00000182544	MFSD5	protein_coding	510.388	-0.399535	0.156571	-2.55179	0.0107172	0.127042
ENSG00000155367	PPM1J	protein_coding	11.9864	-0.669488	0.26242	-2.55121	0.0107349	NA
ENSG00000230113	AC091177.1	antisense	15.9841	0.575829	0.225812	2.55003	0.0107712	NA
ENSG00000114127	XRN1	protein_coding	1410.63	0.385806	0.151317	2.54966	0.0107828	0.127457
ENSG00000129515	SNX6	protein_coding	2148.12	0.292914	0.114884	2.54964	0.0107833	0.127457
ENSG00000136717	BIN1	protein_coding	357.608	-0.687549	0.269733	-2.549	0.0108033	0.127457
ENSG00000250659	RP11-864I4.3	antisense	17.4931	0.763136	0.299398	2.5489	0.0108064	NA
ENSG00000167721	TSR1	protein_coding	331.431	-0.217423	0.0853065	-2.54872	0.0108119	0.127457
ENSG00000166848	TERF2IP	protein_coding	1220.02	-0.210071	0.0824229	-2.5487	0.0108125	0.127457
ENSG00000070614	NDST1	protein_coding	2254.42	-0.41204	0.161674	-2.54859	0.0108158	0.127457
ENSG00000160963	COL26A1	protein_coding	6.68382	-0.69456	0.272541	-2.54846	0.01082	NA
ENSG00000213762	ZNF134	protein_coding	307.096	-0.419507	0.164638	-2.54806	0.0108325	0.127528
ENSG00000012232	EXTL3	protein_coding	1497.28	-0.297885	0.116973	-2.54661	0.0108774	0.12776
ENSG00000065970	FOXJ2	protein_coding	1136.03	-0.261127	0.10254	-2.54659	0.0108781	0.12776
ENSG00000196459	TRAPPC2	protein_coding	146.123	0.276239	0.108499	2.546	0.0108964	0.12776
ENSG00000279811	RP11-862L9.2	TEC	12.1527	0.552856	0.217148	2.54599	0.0108967	NA
ENSG00000064961	HMG20B	protein_coding	1023.33	-0.234034	0.0919304	-2.54578	0.0109034	0.12776
ENSG00000205659	LIN52	protein_coding	109.852	0.359861	0.141359	2.54572	0.0109053	0.12776
ENSG00000229118	AC068491.2	lincRNA	0.254502	0.503762	0.197913	2.54537	0.0109163	NA
ENSG00000062485	CS	protein_coding	2973.64	-0.202389	0.0795208	-2.5451	0.0109245	0.12786
ENSG00000266017	MIR4477B	miRNA	10.3052	0.670316	0.26344	2.54448	0.0109441	NA
ENSG00000088833	NSFL1C	protein_coding	1470.28	-0.154458	0.0607065	-2.54434	0.0109483	0.127936
ENSG00000160055	TMEM234	protein_coding	102.463	0.30565	0.120135	2.54422	0.0109523	0.127936
ENSG00000089682	RBM41	protein_coding	235.217	0.339602	0.133531	2.54324	0.0109831	0.128171
ENSG00000088247	KHSRP	protein_coding	2582.77	-0.278784	0.109642	-2.54268	0.0110004	0.12825
ENSG00000247315	ZCCHC3	protein_coding	850.75	-0.293179	0.115344	-2.54178	0.011029	0.128458
ENSG00000204842	ATXN2	protein_coding	371.141	0.354238	0.139484	2.53964	0.0110968	0.128985
ENSG00000136514	RTP4	protein_coding	83.5215	0.525972	0.207128	2.53936	0.0111057	0.128985
ENSG00000148308	GTF3C5	protein_coding	743.381	-0.182997	0.072065	-2.53933	0.0111065	0.128985
ENSG00000141506	PIK3R5	protein_coding	4744.2	-0.283568	0.111708	-2.53847	0.0111338	0.129178
ENSG00000086061	DNAJA1	protein_coding	2651.62	0.345095	0.135997	2.53752	0.0111642	0.129405
ENSG00000148426	PROSER2	protein_coding	111.117	-0.599494	0.236366	-2.5363	0.0112032	0.129732
ENSG00000121594	CD80	protein_coding	13.0108	0.72511	0.285919	2.53607	0.0112105	NA
ENSG00000125148	MT2A	protein_coding	779.791	0.66827	0.263617	2.535	0.0112447	0.129912
ENSG00000131018	SYNE1	protein_coding	1362.68	0.352772	0.139161	2.53499	0.011245	0.129912
ENSG00000188677	PARVB	protein_coding	803.248	-0.257122	0.101437	-2.5348	0.0112511	0.129912
ENSG00000170855	TRIAP1	protein_coding	404.999	-0.276958	0.109306	-2.53378	0.0112838	0.130015
ENSG00000168591	TMUB2	protein_coding	1485.35	0.203354	0.0802578	2.53376	0.0112846	0.130015
ENSG00000106078	COBL	protein_coding	1.66208	-0.722361	0.2851	-2.53371	0.0112862	NA
ENSG00000105738	SIPA1L3	protein_coding	563.642	-0.328597	0.1297	-2.53352	0.0112924	0.130015
ENSG00000260233	SSSCA1-AS1	processed_transcript	26.5836	0.41579	0.164144	2.53308	0.0113064	0.13005
ENSG00000254685	FPGT	protein_coding	197.304	0.388517	0.153448	2.53191	0.0113443	0.130362
ENSG00000125520	SLC2A4RG	protein_coding	445.529	-0.288036	0.113779	-2.53153	0.0113565	0.130377
ENSG00000174738	NR1D2	protein_coding	1131.35	-0.52516	0.207499	-2.5309	0.0113769	0.130446
ENSG00000186812	ZNF397	protein_coding	150.511	0.394559	0.15591	2.53068	0.0113842	0.130446
ENSG00000137806	NDUFAF1	protein_coding	192.949	0.524852	0.207483	2.52962	0.0114187	0.130671
ENSG00000027847	B4GALT7	protein_coding	349.387	-0.244473	0.0966524	-2.52941	0.0114255	0.130671
ENSG00000255363	RP11-672A2.5	lincRNA	5.01325	0.735241	0.290718	2.52905	0.0114371	NA
ENSG00000115109	EPB41L5	protein_coding	56.3673	0.474972	0.18784	2.5286	0.0114519	0.130848
ENSG00000090530	LEPREL1	protein_coding	14.5287	-0.695505	0.275096	-2.52823	0.0114639	NA
ENSG00000130066	SAT1	protein_coding	40479	0.492469	0.194886	2.52696	0.0115056	0.131336
ENSG00000269119	HNRNPA1P52	processed_pseudogene	1.11055	0.735488	0.291219	2.52555	0.0115518	NA
ENSG00000122008	POLK	protein_coding	660.957	0.378999	0.150118	2.52468	0.0115804	0.131891
ENSG00000270000	RP3-449M8.9	lincRNA	1.93218	0.760367	0.301255	2.52399	0.011603	NA
ENSG00000275088	RP11-442O1.3	lincRNA	2.6904	0.756217	0.299623	2.52389	0.0116064	NA
ENSG00000233755	RP4-799D16.1	lincRNA	0.250907	0.495314	0.196259	2.52378	0.01161	NA
ENSG00000196458	ZNF605	protein_coding	69.382	0.484618	0.192043	2.52349	0.0116198	0.131891
ENSG00000138623	SEMA7A	protein_coding	82.7028	-0.601632	0.238448	-2.52311	0.0116322	0.131891
ENSG00000136504	KAT7	protein_coding	1519.98	-0.300836	0.119255	-2.52262	0.0116484	0.131891
ENSG00000136732	GYPC	protein_coding	489.714	-0.374689	0.148547	-2.52237	0.0116567	0.131891
ENSG00000178996	SNX18	protein_coding	4006.92	-0.32744	0.129821	-2.52224	0.0116609	0.131891
ENSG00000135637	CCDC142	protein_coding	142.655	0.419936	0.166509	2.52201	0.0116687	0.131891
ENSG00000160932	LY6E	protein_coding	5272.08	0.737389	0.292416	2.52171	0.0116787	0.131891
ENSG00000105197	TIMM50	protein_coding	589.558	-0.213768	0.084777	-2.52153	0.0116845	0.131891
ENSG00000225611	RP11-70C1.1	antisense	21.6047	0.531693	0.210877	2.52134	0.0116907	NA
ENSG00000138363	ATIC	protein_coding	385.005	-0.519556	0.206066	-2.52131	0.0116919	0.131891
ENSG00000204569	PPP1R10	protein_coding	612.946	0.351666	0.139483	2.5212	0.0116954	0.131891
ENSG00000175216	CKAP5	protein_coding	676.679	0.247778	0.0982928	2.52082	0.0117083	0.131891
ENSG00000183137	CEP57L1	protein_coding	62.7497	0.386683	0.153399	2.52076	0.0117103	0.131891
ENSG00000198019	FCGR1B	protein_coding	281.736	0.607325	0.240931	2.52074	0.0117108	0.131891
ENSG00000073060	SCARB1	protein_coding	496.206	-0.378979	0.150361	-2.52046	0.0117202	0.131891
ENSG00000099331	MYO9B	protein_coding	7687.21	-0.268424	0.106518	-2.51998	0.011736	0.131891
ENSG00000120948	TARDBP	protein_coding	635.4	0.291654	0.115745	2.5198	0.0117421	0.131891
ENSG00000211454	AKR7L	polymorphic_pseudogene	5.11558	-0.734798	0.291623	-2.51968	0.0117461	NA
ENSG00000108561	C1QBP	protein_coding	978.137	-0.293849	0.116633	-2.51943	0.0117545	0.131891
ENSG00000254198	RP11-598P20.3	processed_pseudogene	25.3731	-0.493411	0.195892	-2.5188	0.0117756	0.131891
ENSG00000274963	Metazoa_SRP	misc_RNA	21.2875	0.730781	0.290131	2.5188	0.0117757	NA
ENSG00000263069	CTD-2047H16.4	antisense	31.7076	0.742604	0.294867	2.51844	0.0117877	0.131891
ENSG00000111450	STX2	protein_coding	491.642	0.375486	0.149116	2.51808	0.0117996	0.131891
ENSG00000277161	PIGW	protein_coding	128.976	-0.272255	0.108125	-2.51796	0.0118037	0.131891
ENSG00000168397	ATG4B	protein_coding	1297.64	-0.1547	0.0614412	-2.51785	0.0118074	0.131891
ENSG00000145348	TBCK	protein_coding	271.326	0.314311	0.124848	2.51755	0.0118175	0.131891
ENSG00000211679	IGLC3	IG_C_gene	19.3005	0.749231	0.297669	2.517	0.0118359	NA
ENSG00000007038	PRSS21	protein_coding	49.622	-0.722826	0.287241	-2.51644	0.0118546	0.132182
ENSG00000066136	NFYC	protein_coding	1173.85	0.198683	0.0789669	2.51603	0.0118684	0.132214
ENSG00000197054	ZNF763	protein_coding	16.032	0.525854	0.209041	2.51556	0.0118845	NA
ENSG00000137124	ALDH1B1	protein_coding	80.3125	-0.462197	0.183838	-2.51415	0.0119319	0.132798
ENSG00000115159	GPD2	protein_coding	819.013	0.374681	0.149068	2.51349	0.0119542	0.132923
ENSG00000187808	SOWAHD	protein_coding	61.9357	-0.634416	0.252576	-2.51179	0.0120122	0.133395
ENSG00000171865	RNASEH1	protein_coding	248.779	-0.231261	0.0920774	-2.51159	0.0120189	0.133395
ENSG00000279776	RP1-86D1.3	TEC	2.06239	-0.762536	0.303633	-2.51138	0.0120262	NA
ENSG00000196187	TMEM63A	protein_coding	618.356	0.375588	0.149608	2.51048	0.0120567	0.133662
ENSG00000113360	DROSHA	protein_coding	390.255	0.21164	0.0843107	2.51023	0.0120651	0.133662
ENSG00000103018	CYB5B	protein_coding	828.96	0.38593	0.153774	2.50973	0.0120825	0.13373
ENSG00000185839	RP4-592A1.2	processed_pseudogene	4.57542	0.682847	0.272123	2.50933	0.0120961	NA
ENSG00000138867	GUCD1	protein_coding	1982.54	-0.346289	0.138076	-2.50796	0.0121432	0.134153
ENSG00000267102	RP11-686D22.7	transcribed_processed_pseudogene	44.4678	0.487448	0.194373	2.50779	0.0121488	0.134153
ENSG00000186908	ZDHHC17	protein_coding	930.511	0.334082	0.133226	2.50764	0.0121542	0.134153
ENSG00000263219	RYKP1	processed_pseudogene	1.55388	0.751358	0.29968	2.50721	0.012169	NA
ENSG00000224121	ATG12P2	processed_pseudogene	0.604846	0.639182	0.254941	2.50717	0.0121701	NA
ENSG00000109062	SLC9A3R1	protein_coding	2334.48	-0.429482	0.171333	-2.50671	0.0121859	0.13438
ENSG00000165233	C9orf89	protein_coding	1853.41	-0.394636	0.157472	-2.50607	0.0122082	0.134503
ENSG00000203666	EFCAB2	protein_coding	68.353	0.587745	0.234673	2.50453	0.0122615	0.134966
ENSG00000005469	CROT	protein_coding	75.2759	0.357535	0.142797	2.5038	0.0122868	0.135121
ENSG00000187118	CMC1	protein_coding	181.779	0.309085	0.123473	2.50325	0.0123057	0.135205
ENSG00000177192	PUS1	protein_coding	294.128	-0.241671	0.0965575	-2.50287	0.0123191	0.135229
ENSG00000037637	FBXO42	protein_coding	908.442	-0.17559	0.0701795	-2.50201	0.012349	0.135233
ENSG00000203760	CENPW	protein_coding	104.723	0.31671	0.126588	2.5019	0.0123528	0.135233
ENSG00000142875	PRKACB	protein_coding	522.178	0.401246	0.160377	2.50189	0.0123532	0.135233
ENSG00000277579	CTC-268N12.3	sense_intronic	0.57881	0.633314	0.253158	2.50166	0.0123614	NA
ENSG00000114166	KAT2B	protein_coding	1384.11	0.278121	0.111222	2.5006	0.0123983	0.135495
ENSG00000159111	MRPL10	protein_coding	657.731	-0.297343	0.118911	-2.50056	0.0123997	0.135495
ENSG00000124496	TRERF1	protein_coding	1010.37	-0.268434	0.10739	-2.49963	0.0124325	0.135577
ENSG00000125149	C16orf70	protein_coding	788.981	-0.339333	0.135761	-2.49949	0.0124372	0.135577
ENSG00000175893	ZDHHC21	protein_coding	191.784	0.395567	0.158266	2.49938	0.0124411	0.135577
ENSG00000268166	CTC-471F3.6	lincRNA	3.24189	0.755441	0.30227	2.49923	0.0124465	NA
ENSG00000108666	C17orf75	protein_coding	104.529	0.314828	0.126027	2.49809	0.0124864	0.135945
ENSG00000142751	GPN2	protein_coding	309.248	-0.24693	0.0988598	-2.49778	0.0124974	0.135945
ENSG00000213549	AC005077.8	processed_pseudogene	0.769862	0.661452	0.264883	2.49715	0.0125196	NA
ENSG00000261804	RP11-44F14.2	lincRNA	12.1065	0.594873	0.23826	2.49673	0.0125343	NA
ENSG00000159388	BTG2	protein_coding	17981.1	-0.563627	0.225822	-2.49589	0.0125642	0.136548
ENSG00000073536	NLE1	protein_coding	98.986	-0.35574	0.142612	-2.49446	0.012615	0.136862
ENSG00000255320	RP11-755F10.1	antisense	49.954	-0.326103	0.130732	-2.49443	0.0126159	0.136862
ENSG00000150764	DIXDC1	protein_coding	8.44374	0.703404	0.282059	2.49382	0.0126376	NA
ENSG00000131398	KCNC3	protein_coding	453.657	-0.394064	0.158019	-2.49378	0.0126391	0.136906
ENSG00000074842	C19orf10	protein_coding	1445.21	-0.292943	0.117489	-2.49337	0.0126537	0.136906
ENSG00000163993	S100P	protein_coding	427.241	0.72672	0.291462	2.49336	0.0126541	0.136906
ENSG00000117133	RPF1	protein_coding	729.068	-0.270575	0.108564	-2.4923	0.0126917	0.137075
ENSG00000145912	NHP2	protein_coding	338.621	-0.297109	0.119212	-2.49228	0.0126926	0.137075
ENSG00000171155	C1GALT1C1	protein_coding	419.333	0.429583	0.172394	2.49186	0.0127077	0.137115
ENSG00000138641	HERC3	protein_coding	1623.97	0.23681	0.0950546	2.4913	0.0127276	0.137207
ENSG00000198886	MT-ND4	protein_coding	78453.3	-0.431336	0.173223	-2.49006	0.0127722	0.137564
ENSG00000108599	AKAP10	protein_coding	1179.3	0.348656	0.140083	2.48892	0.0128131	0.137866
ENSG00000169100	SLC25A6	protein_coding	18672.9	-0.329033	0.132214	-2.48864	0.0128231	0.137866
ENSG00000105186	ANKRD27	protein_coding	498.778	0.251452	0.101065	2.48802	0.0128456	0.137929
ENSG00000156931	VPS8	protein_coding	1004.18	0.220618	0.0886785	2.48784	0.012852	0.137929
ENSG00000165156	ZHX1	protein_coding	661.106	-0.215685	0.0867215	-2.4871	0.0128788	0.138094
ENSG00000244242	IFITM10	protein_coding	99.6303	-0.667568	0.268513	-2.48617	0.0129126	0.138333
ENSG00000002549	LAP3	protein_coding	4462.43	0.537515	0.216231	2.48584	0.0129248	0.138333
ENSG00000116957	TBCE	protein_coding	309.178	0.355066	0.142853	2.48554	0.0129356	0.138333
ENSG00000075461	CACNG4	protein_coding	0.410209	0.576941	0.232121	2.48552	0.0129362	NA
ENSG00000137842	TMEM62	protein_coding	252.913	0.243993	0.0982131	2.48433	0.0129797	0.138681
ENSG00000138035	PNPT1	protein_coding	510.793	0.470531	0.189442	2.48377	0.0129999	0.13875
ENSG00000078618	NRD1	protein_coding	3776.28	0.172387	0.0694126	2.48352	0.0130093	0.13875
ENSG00000196230	TUBB	protein_coding	2264.34	-0.329259	0.132722	-2.48083	0.0131078	0.139677
ENSG00000121236	TRIM6	protein_coding	12.4266	0.671242	0.27062	2.48038	0.0131241	NA
ENSG00000115271	GCA	protein_coding	4345.06	0.45539	0.183641	2.47978	0.0131464	0.139842
ENSG00000054392	HHAT	protein_coding	69.7889	-0.326865	0.131812	-2.47977	0.0131465	0.139842
ENSG00000187097	ENTPD5	protein_coding	168.687	0.401094	0.161862	2.478	0.0132119	0.140347
ENSG00000174080	CTSF	protein_coding	45.3902	-0.522871	0.211017	-2.47786	0.0132173	0.140347
ENSG00000129250	KIF1C	protein_coding	1217.26	-0.244468	0.0986747	-2.47752	0.01323	0.140358
ENSG00000066557	LRRC40	protein_coding	237.605	0.314866	0.12712	2.47692	0.013252	0.140462
ENSG00000111912	NCOA7	protein_coding	918.265	0.577831	0.233337	2.47639	0.013272	0.140462
ENSG00000196549	MME	protein_coding	216.392	0.739374	0.298579	2.47631	0.0132749	0.140462
ENSG00000196204	RNF216P1	transcribed_unprocessed_pseudogene	148.651	-0.305289	0.123415	-2.47368	0.0133731	0.141376
ENSG00000006712	PAF1	protein_coding	779.952	0.236676	0.0957095	2.47286	0.0134036	0.141574
ENSG00000249264	EEF1A1P9	processed_pseudogene	3.9611	-0.715093	0.289226	-2.47244	0.0134194	NA
ENSG00000115446	UNC50	protein_coding	569.476	0.22652	0.0916673	2.47111	0.0134695	0.142146
ENSG00000213015	ZNF580	protein_coding	275.106	-0.327698	0.132643	-2.47054	0.013491	0.142248
ENSG00000150347	ARID5B	protein_coding	251.367	0.522684	0.211603	2.47012	0.0135069	0.14229
ENSG00000169627	BOLA2B	protein_coding	17.9283	-0.469626	0.190199	-2.46912	0.0135445	NA
ENSG00000168300	PCMTD1	protein_coding	1002.86	0.308413	0.124925	2.46878	0.0135576	0.142699
ENSG00000272010	CTD-3025N20.3	lincRNA	2.15266	0.742669	0.300834	2.4687	0.0135605	NA
ENSG00000229754	CXCR2P1	transcribed_unprocessed_pseudogene	514.844	0.671367	0.271988	2.46837	0.0135729	0.142735
ENSG00000206888	RNU6-48P	snRNA	0.54969	-0.650659	0.263601	-2.46835	0.0135738	NA
ENSG00000118432	CNR1	protein_coding	3.00657	0.708463	0.287039	2.46818	0.0135802	NA
ENSG00000229531	RP1-102G20.5	antisense	1.24272	0.682121	0.276471	2.46724	0.0136158	NA
ENSG00000169554	ZEB2	protein_coding	8562.46	0.295584	0.119813	2.46705	0.0136232	0.143077
ENSG00000118873	RAB3GAP2	protein_coding	740.019	0.288185	0.116821	2.46689	0.0136292	0.143077
ENSG00000153339	TRAPPC8	protein_coding	1462.17	0.263428	0.106809	2.46635	0.0136496	0.143078
ENSG00000176533	GNG7	protein_coding	123.192	-0.439398	0.178164	-2.46626	0.0136532	0.143078
ENSG00000187566	NHLRC1	protein_coding	13.718	-0.577997	0.234436	-2.46548	0.013683	NA
ENSG00000127980	PEX1	protein_coding	309.437	0.403119	0.163591	2.46418	0.0137326	0.143693
ENSG00000162073	PAQR4	protein_coding	136.814	-0.379636	0.154082	-2.46385	0.0137453	0.143693
ENSG00000231508	RP11-452K12.6	processed_pseudogene	2.75863	0.740023	0.300358	2.4638	0.0137472	NA
ENSG00000124019	FAM124B	protein_coding	58.7475	-0.401426	0.162937	-2.46368	0.0137517	0.143693
ENSG00000007237	GAS7	protein_coding	10093.8	-0.276637	0.112304	-2.46328	0.0137671	0.143693
ENSG00000133027	PEMT	protein_coding	190.24	-0.324217	0.131626	-2.46317	0.0137716	0.143693
ENSG00000278615	C11orf48	protein_coding	0.309472	-0.538906	0.218824	-2.46273	0.0137883	NA
ENSG00000155660	PDIA4	protein_coding	1875.8	-0.279213	0.113403	-2.46213	0.0138116	0.14394
ENSG00000149679	CABLES2	protein_coding	229.179	-0.280742	0.114033	-2.46193	0.0138192	0.14394
ENSG00000054938	CHRDL2	protein_coding	0.5557	0.606841	0.246657	2.46026	0.0138836	NA
ENSG00000144741	SLC25A26	protein_coding	237.065	-0.244394	0.0993549	-2.45981	0.0139011	0.144667
ENSG00000177283	FZD8	protein_coding	8.14012	-0.675398	0.274583	-2.45972	0.0139045	NA
ENSG00000138190	EXOC6	protein_coding	425.961	0.29441	0.11972	2.45915	0.0139268	0.14481
ENSG00000106537	TSPAN13	protein_coding	41.6882	-0.693286	0.282063	-2.45791	0.0139747	0.14512
ENSG00000073417	PDE8A	protein_coding	491.524	0.273001	0.111077	2.45776	0.0139808	0.14512
ENSG00000116489	CAPZA1	protein_coding	5354.88	0.274666	0.11179	2.45698	0.014011	0.145203
ENSG00000166750	SLFN5	protein_coding	786.036	0.557843	0.227084	2.45654	0.0140281	0.145203
ENSG00000127124	HIVEP3	protein_coding	760.185	-0.501031	0.203963	-2.45648	0.0140307	0.145203
ENSG00000167536	DHRS13	protein_coding	34.5643	-0.483592	0.196877	-2.45631	0.0140371	0.145203
ENSG00000157470	FAM81A	protein_coding	9.82513	-0.609592	0.248207	-2.45598	0.01405	NA
ENSG00000138468	SENP7	protein_coding	746.554	0.362431	0.147609	2.45535	0.0140748	0.145468
ENSG00000118965	WDR35	protein_coding	60.3668	0.376177	0.153261	2.45449	0.0141086	0.145682
ENSG00000132467	UTP3	protein_coding	500.26	-0.369756	0.150662	-2.4542	0.0141198	0.145682
ENSG00000272452	RP11-391M1.4	lincRNA	16.465	-0.463144	0.188731	-2.45398	0.0141284	NA
ENSG00000141279	NPEPPS	protein_coding	1306.45	0.240031	0.097828	2.45361	0.0141431	0.145798
ENSG00000130734	ATG4D	protein_coding	293.432	-0.374608	0.152699	-2.45325	0.0141571	0.145817
ENSG00000141380	SS18	protein_coding	1281.42	0.167863	0.0684466	2.45247	0.014188	0.14601
ENSG00000115457	IGFBP2	protein_coding	23.3776	0.714601	0.291556	2.45099	0.0142463	NA
ENSG00000114316	USP4	protein_coding	2701.61	0.138241	0.056407	2.45077	0.014255	0.146327
ENSG00000089486	CDIP1	protein_coding	620.529	-0.365366	0.149083	-2.45075	0.0142558	0.146327
ENSG00000070423	RNF126	protein_coding	999.676	-0.278926	0.113814	-2.45072	0.0142572	0.146327
ENSG00000166189	HPS6	protein_coding	355.176	-0.46923	0.191487	-2.45046	0.0142675	0.146327
ENSG00000185880	TRIM69	protein_coding	637.877	0.58084	0.237079	2.44999	0.0142861	0.146393
ENSG00000228203	RNF144A-AS1	processed_transcript	2.52433	0.742009	0.302889	2.44977	0.0142947	NA
ENSG00000154451	GBP5	protein_coding	1763.12	0.631531	0.257822	2.44948	0.0143062	0.14643
ENSG00000029153	ARNTL2	protein_coding	97.8938	0.431552	0.176206	2.44913	0.0143202	0.14643
ENSG00000117528	ABCD3	protein_coding	472.297	0.254311	0.103847	2.44891	0.0143289	0.14643
ENSG00000206560	ANKRD28	protein_coding	410.336	0.589151	0.2406	2.44867	0.0143384	0.14643
ENSG00000217195	RP11-277I20.2	processed_pseudogene	0.841249	0.692284	0.282746	2.44843	0.014348	NA
ENSG00000170956	CEACAM3	protein_coding	136.397	0.592488	0.242057	2.44772	0.0143765	0.146598
ENSG00000105298	CACTIN	protein_coding	307.734	-0.23645	0.0966028	-2.44765	0.0143793	0.146598
ENSG00000168014	C2CD3	protein_coding	415.636	0.223109	0.0911653	2.4473	0.0143932	0.146616
ENSG00000277715	RP11-651L5.3	antisense	10.5918	0.55308	0.22601	2.44715	0.0143989	NA
ENSG00000221916	C19orf73	protein_coding	4.37585	0.716806	0.292955	2.44682	0.0144124	NA
ENSG00000262973	RP11-708H21.4	lincRNA	19.2642	0.682498	0.278979	2.44642	0.0144285	NA
ENSG00000214402	LCNL1	protein_coding	2.8643	-0.743218	0.303901	-2.44559	0.0144614	NA
ENSG00000231663	RP5-827C21.4	antisense	24.8396	-0.413524	0.169111	-2.44528	0.0144739	0.147312
ENSG00000137752	CASP1	protein_coding	7105.47	0.315718	0.12917	2.4442	0.0145174	0.14763
ENSG00000233029	RP11-439A17.9	antisense	18.7868	0.649991	0.265947	2.44406	0.0145232	NA
ENSG00000168286	THAP11	protein_coding	628.853	-0.371426	0.151986	-2.44382	0.0145329	0.147663
ENSG00000108244	KRT23	protein_coding	54.1994	0.65682	0.268875	2.44285	0.0145719	0.147926
ENSG00000150456	N6AMT2	protein_coding	27.7285	0.42511	0.174043	2.44256	0.0145834	0.147926
ENSG00000178623	GPR35	protein_coding	530.53	-0.448803	0.18377	-2.4422	0.0145979	0.147948
ENSG00000184986	TMEM121	protein_coding	2.22383	-0.740762	0.303374	-2.44174	0.0146165	NA
ENSG00000130726	TRIM28	protein_coding	2317.24	-0.278985	0.114267	-2.44152	0.0146255	0.148103
ENSG00000207355	RNU6-1257P	snRNA	0.875424	0.701638	0.287498	2.44049	0.0146672	NA
ENSG00000182095	TNRC18	protein_coding	4062.26	-0.292595	0.119941	-2.43949	0.0147078	0.148812
ENSG00000164674	SYTL3	protein_coding	531.281	0.323527	0.132664	2.43868	0.0147409	0.14902
ENSG00000151466	SCLT1	protein_coding	808.731	0.318966	0.130895	2.43681	0.0148176	0.149671
ENSG00000105722	ERF	protein_coding	758.686	-0.408231	0.167553	-2.43642	0.0148333	0.149703
ENSG00000117335	CD46	protein_coding	6461.18	0.22078	0.090634	2.43595	0.0148528	0.149774
ENSG00000234361	RP11-52J3.3	antisense	2.01774	0.731536	0.300387	2.43531	0.0148791	NA
ENSG00000275530	FP671120.4	miRNA	0.917589	0.5511	0.226298	2.43529	0.0148799	NA
ENSG00000188897	CTD-3088G3.8	protein_coding	37.6797	0.69362	0.284922	2.43442	0.0149156	0.150281
ENSG00000196850	PPTC7	protein_coding	3919.45	-0.287303	0.118038	-2.43399	0.0149333	0.150334
ENSG00000225370	AC011515.2	unprocessed_pseudogene	9.12838	0.619354	0.2545	2.43361	0.0149492	NA
ENSG00000189180	ZNF33A	protein_coding	722.401	0.349533	0.143641	2.43338	0.0149587	0.150374
ENSG00000104381	GDAP1	protein_coding	125.207	0.376474	0.154718	2.43329	0.0149623	0.150374
ENSG00000171223	JUNB	protein_coding	35257.9	-0.366414	0.150638	-2.43241	0.0149985	0.150612
ENSG00000279511	RP11-676B18.1	TEC	0.405711	0.545569	0.224405	2.43118	0.0150496	NA
ENSG00000143819	EPHX1	protein_coding	428.314	-0.303533	0.124851	-2.43117	0.0150504	0.151006
ENSG00000148795	CYP17A1	protein_coding	4.77707	0.68393	0.281426	2.43023	0.0150893	NA
ENSG00000124782	RREB1	protein_coding	2143.98	-0.252934	0.104082	-2.43014	0.0150931	0.151277
ENSG00000138764	CCNG2	protein_coding	1575.03	-0.296587	0.122059	-2.42987	0.0151041	0.151277
ENSG00000136159	NUDT15	protein_coding	331.425	-0.247457	0.10185	-2.42961	0.0151151	0.151277
ENSG00000254929	RP11-144G6.12	processed_transcript	2.02111	0.733236	0.301838	2.42924	0.0151306	NA
ENSG00000137814	HAUS2	protein_coding	396.135	-0.205723	0.0846867	-2.42923	0.0151311	0.151311
ENSG00000107371	EXOSC3	protein_coding	99.555	0.307208	0.126501	2.4285	0.0151614	0.151488
ENSG00000124523	SIRT5	protein_coding	146.236	0.313868	0.129272	2.42796	0.0151841	0.151588
ENSG00000184988	TMEM106A	protein_coding	290.749	0.443835	0.182842	2.42743	0.0152063	0.151685
ENSG00000149262	INTS4	protein_coding	470.915	0.195465	0.0805593	2.42635	0.0152517	0.152011
ENSG00000279107	RP11-823P9.4	TEC	2.24148	0.729524	0.300713	2.42598	0.0152671	NA
ENSG00000089094	KDM2B	protein_coding	1266.49	-0.250568	0.103321	-2.42515	0.015302	0.152386
ENSG00000250896	RNPS1P1	processed_pseudogene	0.604539	-0.651967	0.268862	-2.42491	0.0153123	NA
ENSG00000186130	ZBTB6	protein_coding	205.682	-0.511664	0.211025	-2.42466	0.0153227	0.152466
ENSG00000177030	DEAF1	protein_coding	546.112	-0.280282	0.115623	-2.4241	0.0153465	0.152576
ENSG00000162496	DHRS3	protein_coding	18.7943	-0.726018	0.299553	-2.42367	0.0153646	NA
ENSG00000145293	ENOPH1	protein_coding	618.856	-0.23042	0.0950823	-2.42337	0.0153771	0.152755
ENSG00000106591	MRPL32	protein_coding	336.111	0.243953	0.100693	2.42274	0.015404	0.152868
ENSG00000105323	HNRNPUL1	protein_coding	5961.47	-0.262053	0.108176	-2.42247	0.0154152	0.152868
ENSG00000178695	KCTD12	protein_coding	13315.3	-0.256095	0.105728	-2.4222	0.0154267	0.152868
ENSG00000258044	RP11-530C5.2	antisense	6.5397	0.709305	0.292853	2.42205	0.0154332	NA
ENSG00000187189	TSPYL4	protein_coding	211.369	-0.211034	0.0871591	-2.42126	0.015467	0.153061
ENSG00000119231	SENP5	protein_coding	559.796	-0.337404	0.139358	-2.42113	0.0154725	0.153061
ENSG00000244482	LILRA6	protein_coding	1719.24	0.411461	0.169974	2.42072	0.0154896	0.153061
ENSG00000276343	RP1-71H24.6	lincRNA	46.7091	0.687009	0.283824	2.42055	0.0154971	0.153061
ENSG00000124780	KCNK17	protein_coding	3.88926	-0.718019	0.296681	-2.42017	0.0155132	NA
ENSG00000118762	PKD2	protein_coding	293.7	0.305749	0.126338	2.42009	0.0155165	0.153062
ENSG00000137944	CCBL2	protein_coding	493.97	0.281587	0.116365	2.41986	0.0155266	0.153062
ENSG00000113194	FAF2	protein_coding	950.07	-0.315958	0.13058	-2.41965	0.0155354	0.153062
ENSG00000273001	RP11-118K6.3	lincRNA	0.279363	0.49984	0.206582	2.41957	0.0155389	NA
ENSG00000240859	AC093627.10	lincRNA	142.425	0.419348	0.173355	2.41901	0.0155628	0.153156
ENSG00000133103	COG6	protein_coding	239.464	0.465403	0.192408	2.41883	0.0155704	0.153156
ENSG00000120885	CLU	protein_coding	333.335	0.724992	0.29979	2.41833	0.0155918	0.153241
ENSG00000186222	BLOC1S4	protein_coding	226.702	-0.3217	0.133069	-2.41754	0.0156256	0.153417
ENSG00000011405	PIK3C2A	protein_coding	689.003	0.310689	0.128526	2.41732	0.0156352	0.153417
ENSG00000101224	CDC25B	protein_coding	426.916	-0.405403	0.16776	-2.41657	0.0156676	0.153513
ENSG00000163029	SMC6	protein_coding	469.836	0.283678	0.117392	2.4165	0.0156706	0.153513
ENSG00000133216	EPHB2	protein_coding	413.186	0.61958	0.256459	2.41591	0.0156961	0.153575
ENSG00000160408	ST6GALNAC6	protein_coding	496.222	-0.309974	0.128313	-2.41576	0.0157024	0.153575
ENSG00000186603	HPDL	protein_coding	6.56408	-0.67028	0.277462	-2.41575	0.0157028	NA
ENSG00000196792	STRN3	protein_coding	341.46	0.358112	0.148287	2.415	0.0157353	0.153771
ENSG00000162517	PEF1	protein_coding	638.241	0.282867	0.117173	2.4141	0.015774	0.153817
ENSG00000104866	PPP1R37	protein_coding	311.436	-0.302206	0.125185	-2.41407	0.0157752	0.153817
ENSG00000272369	RP11-446N19.1	lincRNA	2.54948	-0.733365	0.303808	-2.41391	0.0157824	NA
ENSG00000120868	APAF1	protein_coding	2277.61	0.391976	0.162393	2.41375	0.0157895	0.153817
ENSG00000169718	DUS1L	protein_coding	1479.45	-0.24834	0.102887	-2.41371	0.0157912	0.153817
ENSG00000144659	SLC25A38	protein_coding	223.825	-0.287061	0.118959	-2.41311	0.015817	0.15383
ENSG00000204611	ZNF616	protein_coding	32.0788	0.490326	0.203195	2.41309	0.0158181	0.15383
ENSG00000105967	TFEC	protein_coding	2078.14	0.387348	0.160619	2.41159	0.0158833	0.154298
ENSG00000188157	AGRN	protein_coding	338.513	0.674656	0.279779	2.41139	0.0158919	0.154298
ENSG00000229162	RP11-84D1.1	antisense	1.74023	0.727638	0.301758	2.41133	0.0158946	NA
ENSG00000112655	PTK7	protein_coding	12.3146	-0.648744	0.269096	-2.41083	0.0159162	NA
ENSG00000239789	MRPS17	protein_coding	80.6699	-0.348242	0.144502	-2.40994	0.0159551	0.154786
ENSG00000099622	CIRBP	protein_coding	4689.36	-0.236518	0.0981765	-2.40911	0.0159914	0.155014
ENSG00000130147	SH3BP4	protein_coding	107.691	-0.39577	0.164315	-2.40861	0.0160134	0.155102
ENSG00000092330	TINF2	protein_coding	1830.46	0.208396	0.086554	2.4077	0.0160536	0.155187
ENSG00000001629	ANKIB1	protein_coding	936.68	0.203386	0.0844925	2.40714	0.0160779	0.155187
ENSG00000198727	MT-CYB	protein_coding	32262	-0.429089	0.178265	-2.40703	0.0160826	0.155187
ENSG00000168081	PNOC	protein_coding	32.4537	-0.456812	0.189787	-2.40697	0.0160854	0.155187
ENSG00000101310	SEC23B	protein_coding	1622.08	0.255053	0.105972	2.40678	0.0160936	0.155187
ENSG00000108784	NAGLU	protein_coding	502.306	-0.245054	0.101824	-2.40665	0.0160997	0.155187
ENSG00000163430	FSTL1	protein_coding	8.40273	0.694657	0.288704	2.40612	0.0161228	NA
ENSG00000143153	ATP1B1	protein_coding	195.08	-0.649972	0.270161	-2.40587	0.0161341	0.155394
ENSG00000128274	A4GALT	protein_coding	2.10095	-0.628495	0.261386	-2.40447	0.0161959	NA
ENSG00000170260	ZNF212	protein_coding	159.213	-0.414566	0.172539	-2.40274	0.0162729	0.156566
ENSG00000135362	PRR5L	protein_coding	227.362	0.558006	0.232257	2.40254	0.0162818	0.156566
ENSG00000124126	PREX1	protein_coding	11404.7	-0.241863	0.100698	-2.40187	0.0163116	0.156727
ENSG00000052850	ALX4	protein_coding	0.256247	-0.461577	0.192186	-2.40171	0.0163184	NA
ENSG00000179456	ZBTB18	protein_coding	1716.39	-0.301129	0.12541	-2.40116	0.0163432	0.15679
ENSG00000125089	SH3TC1	protein_coding	3119.52	-0.297859	0.124049	-2.40114	0.0163443	0.15679
ENSG00000163464	CXCR1	protein_coding	147.339	0.71769	0.299029	2.40007	0.0163921	0.157123
ENSG00000100393	EP300	protein_coding	5298.65	-0.373963	0.155873	-2.39915	0.0164332	0.157253
ENSG00000171169	NAIF1	protein_coding	210.27	-0.285421	0.118977	-2.39897	0.0164414	0.157253
ENSG00000163617	KIAA1407	protein_coding	57.8917	0.495383	0.206505	2.39889	0.0164448	0.157253
ENSG00000189241	TSPYL1	protein_coding	1015.74	-0.292248	0.121859	-2.39825	0.0164736	0.157345
ENSG00000072310	SREBF1	protein_coding	1066	-0.367688	0.153325	-2.39809	0.0164807	0.157345
ENSG00000261737	RP4-612B15.3	antisense	12.965	0.507028	0.211495	2.39736	0.0165138	NA
ENSG00000132825	PPP1R3D	protein_coding	318.995	-0.381934	0.159393	-2.39618	0.0165671	0.158045
ENSG00000151148	UBE3B	protein_coding	898.15	0.164372	0.0686215	2.39534	0.0166049	0.15828
ENSG00000263368	RP11-720N19.1	processed_pseudogene	1.83016	0.720511	0.300868	2.39477	0.0166306	NA
ENSG00000109758	HGFAC	protein_coding	0.37371	0.539313	0.225213	2.39468	0.0166347	NA
ENSG00000102580	DNAJC3	protein_coding	2485.9	-0.312453	0.130502	-2.39424	0.016655	0.15854
ENSG00000131446	MGAT1	protein_coding	11017.5	-0.294876	0.123165	-2.39416	0.0166586	0.15854
ENSG00000135116	HRK	protein_coding	3.83941	0.655266	0.273928	2.39211	0.016752	NA
ENSG00000229331	GK-IT1	sense_intronic	1.65139	0.712187	0.297845	2.39114	0.0167962	NA
ENSG00000108700	CCL8	protein_coding	9.10927	0.725096	0.303246	2.39111	0.0167975	NA
ENSG00000001631	KRIT1	protein_coding	282.654	0.380226	0.159154	2.38904	0.0168924	0.160249
ENSG00000130203	APOE	protein_coding	4.67448	-0.69884	0.292523	-2.38901	0.0168938	NA
ENSG00000205268	PDE7A	protein_coding	522.569	0.271175	0.113512	2.38895	0.0168966	0.160249
ENSG00000151576	QTRTD1	protein_coding	748.061	-0.254965	0.106727	-2.38895	0.0168968	0.160249
ENSG00000164253	WDR41	protein_coding	813.849	0.254641	0.106602	2.38871	0.0169079	0.160249
ENSG00000149231	CCDC82	protein_coding	590.377	0.328161	0.137382	2.38867	0.0169095	0.160249
ENSG00000105499	PLA2G4C	protein_coding	59.9523	0.724408	0.303292	2.38848	0.0169182	0.160249
ENSG00000198488	B3GNT6	protein_coding	0.462907	0.570841	0.239002	2.38844	0.0169201	NA
ENSG00000186716	BCR	protein_coding	1052.54	-0.242959	0.101746	-2.38789	0.0169453	0.16038
ENSG00000138376	BARD1	protein_coding	79.4316	0.393574	0.164854	2.38741	0.0169676	0.160402
ENSG00000146757	ZNF92	protein_coding	368.945	-0.365858	0.153254	-2.38726	0.0169743	0.160402
ENSG00000072858	SIDT1	protein_coding	116.321	-0.505951	0.211969	-2.38691	0.0169907	0.160431
ENSG00000172716	SLFN11	protein_coding	1499.27	0.302558	0.1268	2.38611	0.0170276	0.160652
ENSG00000277541	ZNF630-AS1	antisense	0.251739	0.447591	0.187629	2.38552	0.0170552	NA
ENSG00000113108	APBB3	protein_coding	821.224	0.464021	0.194565	2.38491	0.0170833	0.161052
ENSG00000175899	A2M	protein_coding	21.595	-0.618803	0.259472	-2.38485	0.017086	NA
ENSG00000261026	CTD-3247F14.2	sense_overlapping	179.509	0.723626	0.303463	2.38456	0.0170996	0.161079
ENSG00000088881	EBF4	protein_coding	2.39489	-0.721428	0.302569	-2.38434	0.0171097	NA
ENSG00000228470	RP11-176D17.3	sense_overlapping	0.233803	-0.407477	0.170948	-2.38364	0.0171425	NA
ENSG00000214106	PAXIP1OS	antisense	69.6064	0.431967	0.181239	2.38342	0.0171528	0.161192
ENSG00000151743	AMN1	protein_coding	31.014	0.423852	0.177841	2.38332	0.0171571	0.161192
ENSG00000134255	CEPT1	protein_coding	493.928	0.42823	0.179686	2.38321	0.0171623	0.161192
ENSG00000079435	LIPE	protein_coding	7.454	0.628388	0.263677	2.38317	0.0171641	NA
ENSG00000266980	RP11-552F3.4	antisense	1.03601	0.687413	0.288502	2.3827	0.0171864	NA
ENSG00000105202	FBL	protein_coding	1613.33	-0.262278	0.11008	-2.38262	0.0171901	0.161192
ENSG00000107443	CCNJ	protein_coding	396.927	-0.370217	0.155385	-2.38258	0.0171916	0.161192
ENSG00000273247	RP11-83A24.2	antisense	61.3978	0.371165	0.155802	2.38228	0.0172056	0.161192
ENSG00000188290	HES4	protein_coding	108.806	0.677674	0.284516	2.38184	0.0172262	0.161192
ENSG00000107951	MTPAP	protein_coding	461.079	-0.256814	0.107836	-2.38151	0.0172418	0.161192
ENSG00000166016	ABTB2	protein_coding	115.849	0.618112	0.25957	2.38129	0.017252	0.161192
ENSG00000123505	AMD1	protein_coding	2265.53	-0.265481	0.111508	-2.38082	0.0172742	0.161192
ENSG00000234338	RP11-797H7.1	processed_pseudogene	1.31653	-0.6873	0.288689	-2.38077	0.0172767	NA
ENSG00000168159	RNF187	protein_coding	1654.05	-0.276765	0.116253	-2.38071	0.0172793	0.161192
ENSG00000184232	OAF	protein_coding	1404.31	-0.34049	0.14303	-2.38055	0.0172867	0.161192
ENSG00000133065	SLC41A1	protein_coding	67.2842	-0.431166	0.181142	-2.38027	0.0173	0.161192
ENSG00000164902	PHAX	protein_coding	262.689	-0.328447	0.137994	-2.38016	0.0173052	0.161192
ENSG00000143486	EIF2D	protein_coding	936.578	-0.227841	0.0957372	-2.37985	0.0173195	0.161192
ENSG00000175048	ZDHHC14	protein_coding	129.046	-0.4476	0.18809	-2.37971	0.0173262	0.161192
ENSG00000164136	IL15	protein_coding	698.773	0.385218	0.16191	2.37921	0.0173496	0.161286
ENSG00000162959	MEMO1	protein_coding	119.157	-0.209315	0.0880115	-2.37827	0.0173943	0.161576
ENSG00000101146	RAE1	protein_coding	568.283	-0.332651	0.139901	-2.37775	0.0174186	0.161677
ENSG00000004766	CCDC132	protein_coding	339.104	0.333915	0.14045	2.37745	0.0174326	0.161682
ENSG00000275223	RP1-63M2.7	lincRNA	0.598218	0.612369	0.257646	2.37678	0.0174643	NA
ENSG00000138686	BBS7	protein_coding	116.964	0.397186	0.167154	2.37617	0.0174934	0.162121
ENSG00000262209	PCDHGB3	protein_coding	0.382541	-0.53336	0.224736	-2.37328	0.0176309	NA
ENSG00000128596	CCDC136	protein_coding	18.4272	0.59854	0.252273	2.37259	0.0176639	NA
ENSG00000174915	PTDSS2	protein_coding	307.351	-0.212259	0.0894674	-2.37248	0.0176693	0.163571
ENSG00000171552	BCL2L1	protein_coding	686.717	-0.287934	0.121374	-2.37227	0.0176789	0.163571
ENSG00000166428	PLD4	protein_coding	552.312	-0.577966	0.243659	-2.37203	0.0176907	0.163571
ENSG00000229891	LINC01315	lincRNA	7.4829	-0.66636	0.281054	-2.37094	0.0177431	NA
ENSG00000145675	PIK3R1	protein_coding	2254.08	-0.485323	0.204723	-2.37064	0.0177574	0.164061
ENSG00000204116	CHIC1	protein_coding	36.961	0.509959	0.215184	2.36988	0.017794	0.164273
ENSG00000160593	AMICA1	protein_coding	13070.9	0.234598	0.0990205	2.36919	0.0178271	0.164452
ENSG00000237977	EIF4HP2	processed_pseudogene	3.76617	0.70616	0.298207	2.36802	0.0178837	NA
ENSG00000171236	LRG1	protein_coding	375.746	0.615041	0.259752	2.3678	0.0178941	0.16477
ENSG00000145331	TRMT10A	protein_coding	90.0165	0.339524	0.143393	2.36779	0.0178947	0.16477
ENSG00000178904	DPY19L3	protein_coding	476.701	0.252008	0.106439	2.36763	0.0179026	0.16477
ENSG00000275450	RP11-4L24.3	lincRNA	8.98721	0.658855	0.278321	2.36725	0.0179207	NA
ENSG00000129932	DOHH	protein_coding	126.795	-0.317143	0.133981	-2.36708	0.0179289	0.164886
ENSG00000262558	RP11-1260E13.3	antisense	0.306529	0.428631	0.181124	2.3665	0.0179571	NA
ENSG00000138246	DNAJC13	protein_coding	2770.15	0.363648	0.153666	2.36649	0.0179578	0.165025
ENSG00000254325	RP11-318K15.2	sense_intronic	4.29744	0.717936	0.303392	2.36636	0.0179639	NA
ENSG00000251354	RP11-697N18.1	unprocessed_pseudogene	0.59763	0.562939	0.23796	2.36569	0.0179966	NA
ENSG00000254254	RP11-17A4.2	antisense	6.79593	0.65311	0.276124	2.36527	0.0180167	NA
ENSG00000013306	SLC25A39	protein_coding	1069.13	-0.253542	0.107212	-2.36487	0.0180364	0.165621
ENSG00000120539	MASTL	protein_coding	329.3	0.460851	0.194974	2.36365	0.0180958	0.16604
ENSG00000006451	RALA	protein_coding	594.374	0.34049	0.144087	2.36309	0.0181233	0.166165
ENSG00000273729	RP11-7F17.8	antisense	20.6211	-0.420191	0.177841	-2.36273	0.0181406	NA
ENSG00000079277	MKNK1	protein_coding	1212.63	0.160582	0.0680265	2.36058	0.0182462	0.167048
ENSG00000092871	RFFL	protein_coding	452.305	-0.2112	0.0894703	-2.36056	0.0182474	0.167048
ENSG00000136235	GPNMB	protein_coding	100.926	-0.604037	0.256001	-2.35951	0.018299	0.167237
ENSG00000142208	AKT1	protein_coding	2970.46	-0.213863	0.0906422	-2.35942	0.0183034	0.167237
ENSG00000150681	RGS18	protein_coding	1243.31	0.427427	0.181168	2.35929	0.0183098	0.167237
ENSG00000128617	OPN1SW	protein_coding	19.4509	-0.423203	0.179466	-2.35812	0.0183679	NA
ENSG00000236031	RP11-269F20.1	antisense	1.12436	0.702903	0.298123	2.35777	0.0183853	NA
ENSG00000172869	DMXL1	protein_coding	1823.95	0.233435	0.0990288	2.35725	0.018411	0.167798
ENSG00000205302	SNX2	protein_coding	4974.48	0.217344	0.0922035	2.35722	0.0184122	0.167798
ENSG00000077254	USP33	protein_coding	1466.45	0.251978	0.106897	2.3572	0.0184132	0.167798
ENSG00000163072	NOSTRIN	protein_coding	0.843362	-0.583067	0.247356	-2.3572	0.0184133	NA
ENSG00000167105	TMEM92	protein_coding	0.71175	0.606182	0.257181	2.35702	0.0184222	NA
ENSG00000271927	CTD-2541M15.4	lincRNA	15.4648	0.465415	0.197497	2.35657	0.0184448	NA
ENSG00000187994	RINL	protein_coding	234.979	0.331901	0.140861	2.35624	0.0184612	0.167798
ENSG00000128915	ICE2	protein_coding	646.78	0.238826	0.10137	2.35599	0.0184737	0.167798
ENSG00000143452	HORMAD1	protein_coding	52.0493	0.526804	0.223603	2.35598	0.018474	0.167798
ENSG00000172765	TMCC1	protein_coding	780.048	0.200542	0.0851261	2.35582	0.0184818	0.167798
ENSG00000180066	C10orf91	protein_coding	3.93471	-0.667293	0.283265	-2.35572	0.018487	NA
ENSG00000084733	RAB10	protein_coding	3752.01	0.455479	0.193354	2.35568	0.0184891	0.167798
ENSG00000141101	NOB1	protein_coding	429.221	-0.26113	0.110859	-2.35552	0.0184969	0.167798
ENSG00000143643	TTC13	protein_coding	753.873	0.236777	0.100533	2.35521	0.0185123	0.167811
ENSG00000119862	LGALSL	protein_coding	22.5109	0.604152	0.256577	2.35466	0.0185396	NA
ENSG00000101574	METTL4	protein_coding	129.563	0.294005	0.124885	2.3542	0.0185624	0.168139
ENSG00000274487	CH17-431G21.1	unprocessed_pseudogene	14.7621	0.463562	0.19701	2.35299	0.0186231	NA
ENSG00000272906	RP11-533E19.7	lincRNA	1.90505	0.708326	0.30113	2.35223	0.0186614	NA
ENSG00000139266	MARCH9	protein_coding	129.409	-0.305021	0.129674	-2.35222	0.0186618	0.168852
ENSG00000161929	SCIMP	protein_coding	2063.91	0.383946	0.163237	2.35207	0.0186692	0.168852
ENSG00000104774	MAN2B1	protein_coding	7074.21	-0.293925	0.124997	-2.35145	0.0187002	0.169005
ENSG00000132386	SERPINF1	protein_coding	176.518	-0.516635	0.219763	-2.35087	0.0187295	0.169142
ENSG00000163312	HELQ	protein_coding	250.138	0.253761	0.107982	2.35003	0.0187719	0.169398
ENSG00000259915	RP11-410E4.1	lincRNA	0.996224	0.694014	0.295429	2.34917	0.0188151	NA
ENSG00000175906	ARL4D	protein_coding	22.805	-0.640954	0.272884	-2.34881	0.0188334	NA
ENSG00000183386	FHL3	protein_coding	687.728	-0.375709	0.159996	-2.34825	0.018862	0.17005
ENSG00000083845	RPS5	protein_coding	7515.48	-0.301229	0.128296	-2.34791	0.0188789	0.17005
ENSG00000225329	RP11-325F22.5	lincRNA	0.703391	-0.615693	0.262266	-2.34759	0.0188952	NA
ENSG00000196954	CASP4	protein_coding	3853.74	0.257484	0.109694	2.3473	0.0189101	0.17005
ENSG00000228427	RP5-1091N2.9	antisense	76.1843	0.38007	0.161927	2.34717	0.0189166	0.17005
ENSG00000168807	SNTB2	protein_coding	263.7	0.380987	0.16232	2.34714	0.0189183	0.17005
ENSG00000255236	CTD-2655K5.1	antisense	0.61591	0.636791	0.271338	2.34686	0.0189325	NA
ENSG00000188779	SKOR1	protein_coding	35.1657	-0.461003	0.196449	-2.34668	0.0189417	0.17005
ENSG00000072736	NFATC3	protein_coding	813.512	-0.224687	0.0957483	-2.34665	0.0189431	0.17005
ENSG00000010671	BTK	protein_coding	3805.52	0.287111	0.122373	2.3462	0.0189659	0.17006
ENSG00000100316	RPL3	protein_coding	28852.1	-0.289442	0.123387	-2.34581	0.0189859	0.17006
ENSG00000163563	MNDA	protein_coding	19020.6	0.487814	0.207953	2.34579	0.0189867	0.17006
ENSG00000165617	DACT1	protein_coding	10.6008	-0.576175	0.245678	-2.34525	0.0190144	NA
ENSG00000140386	SCAPER	protein_coding	293.096	0.285711	0.121854	2.34469	0.0190427	0.170242
ENSG00000163013	FBXO41	protein_coding	819.885	-0.262393	0.111915	-2.34457	0.0190492	0.170242
ENSG00000060491	OGFR	protein_coding	3026.14	-0.305323	0.130235	-2.34441	0.0190574	0.170242
ENSG00000261609	GAN	protein_coding	144.946	-0.373096	0.159152	-2.34428	0.0190637	0.170242
ENSG00000106341	PPP1R17	protein_coding	30.1979	0.665369	0.283882	2.34382	0.0190873	0.170283
ENSG00000102034	ELF4	protein_coding	3874.54	-0.361367	0.154214	-2.34328	0.019115	0.170283
ENSG00000088992	TESC	protein_coding	853.723	-0.32363	0.138122	-2.34308	0.0191255	0.170283
ENSG00000278383	RP4-694B14.8	antisense	0.740092	-0.647438	0.276326	-2.34303	0.0191281	NA
ENSG00000113368	LMNB1	protein_coding	1799.48	0.425422	0.181604	2.34259	0.0191506	0.170283
ENSG00000102471	NDFIP2	protein_coding	1.76868	0.70618	0.3015	2.34223	0.0191691	NA
ENSG00000144580	RQCD1	protein_coding	687.254	-0.179727	0.0767345	-2.34219	0.019171	0.170283
ENSG00000105426	PTPRS	protein_coding	57.3443	-0.707781	0.302194	-2.34214	0.0191734	0.170283
ENSG00000188917	TRMT2B	protein_coding	438.796	-0.183339	0.078294	-2.34167	0.0191974	0.170283
ENSG00000261476	RP11-77K12.3	sense_intronic	2.9319	0.703778	0.300553	2.34161	0.0192007	NA
ENSG00000245680	ZNF585B	protein_coding	58.8041	0.345916	0.147731	2.34152	0.0192055	0.170283
ENSG00000140848	CPNE2	protein_coding	1308.5	-0.276441	0.11807	-2.34134	0.0192148	0.170283
ENSG00000141385	AFG3L2	protein_coding	793.597	-0.240244	0.102616	-2.34119	0.0192222	0.170283
ENSG00000134086	VHL	protein_coding	1952.27	-0.201205	0.0859424	-2.34116	0.0192241	0.170283
ENSG00000254911	SCARNA9	antisense	1.63481	0.706048	0.301598	2.34103	0.0192308	NA
ENSG00000000460	C1orf112	protein_coding	64.8989	0.387921	0.165847	2.33903	0.019334	0.171074
ENSG00000090776	EFNB1	protein_coding	274.702	-0.423183	0.180934	-2.33888	0.0193419	0.171074
ENSG00000203685	C1orf95	protein_coding	0.594031	0.604213	0.258376	2.33851	0.019361	NA
ENSG00000256235	SMIM3	protein_coding	883.669	-0.374874	0.160336	-2.33806	0.0193843	0.171323
ENSG00000127314	RAP1B	protein_coding	8520.56	0.226542	0.0969353	2.33704	0.0194372	0.171581
ENSG00000178896	EXOSC4	protein_coding	88.2567	-0.316409	0.135394	-2.33694	0.0194421	0.171581
ENSG00000165886	UBTD1	protein_coding	443.138	-0.344253	0.147364	-2.33607	0.0194878	0.171709
ENSG00000184432	COPB2	protein_coding	1771.49	0.416208	0.178186	2.33581	0.0195013	0.171709
ENSG00000115839	RAB3GAP1	protein_coding	1044.99	0.185684	0.0794998	2.33566	0.0195092	0.171709
ENSG00000043143	JADE2	protein_coding	778.958	-0.389306	0.166686	-2.33557	0.0195137	0.171709
ENSG00000030066	NUP160	protein_coding	624.401	0.305759	0.13095	2.33492	0.0195474	0.17188
ENSG00000185624	P4HB	protein_coding	7815.11	-0.310946	0.133249	-2.33356	0.0196186	0.17238
ENSG00000202441	RNY4P10	misc_RNA	5.58918	0.670239	0.287244	2.33334	0.0196302	NA
ENSG00000173726	TOMM20	protein_coding	4089.78	-0.260671	0.111723	-2.3332	0.0196378	0.172422
ENSG00000237438	CECR7	lincRNA	27.3315	0.663312	0.284358	2.33266	0.0196659	0.172543
ENSG00000220267	ACTBP8	processed_pseudogene	4.41654	0.699123	0.299796	2.332	0.0197009	NA
ENSG00000133808	MICALCL	protein_coding	272.512	-0.440728	0.189015	-2.33171	0.0197158	0.172855
ENSG00000106991	ENG	protein_coding	1182.4	-0.397992	0.170734	-2.33107	0.0197498	0.173027
ENSG00000116574	RHOU	protein_coding	2154.1	-0.427633	0.183483	-2.33064	0.0197725	0.1731
ENSG00000112062	MAPK14	protein_coding	2311.11	0.232861	0.100036	2.32777	0.0199246	0.174304
ENSG00000123607	TTC21B	protein_coding	279.85	0.28832	0.123883	2.32737	0.0199458	0.174363
ENSG00000090447	TFAP4	protein_coding	126.49	-0.489341	0.210323	-2.32662	0.0199856	0.174486
ENSG00000115942	ORC2	protein_coding	178.027	0.36431	0.156588	2.32656	0.0199889	0.174486
ENSG00000130023	ERMARD	protein_coding	211.193	0.387587	0.166638	2.32593	0.0200222	0.174604
ENSG00000146576	C7orf26	protein_coding	844.561	-0.259275	0.11148	-2.32576	0.0200316	0.174604
ENSG00000183569	SERHL2	protein_coding	26.599	-0.566347	0.243562	-2.32527	0.0200573	0.174702
ENSG00000075142	SRI	protein_coding	923.448	0.241364	0.103836	2.32447	0.0201006	0.174952
ENSG00000100154	TTC28	protein_coding	16.0011	-0.559323	0.240632	-2.3244	0.0201043	NA
ENSG00000241947	HNRNPA1P24	processed_pseudogene	0.301645	0.499675	0.214998	2.32409	0.0201207	NA
ENSG00000160223	ICOSLG	protein_coding	568.128	-0.640058	0.275411	-2.32401	0.020125	0.175038
ENSG00000196812	ZSCAN16	protein_coding	59.5526	0.329138	0.141645	2.32369	0.0201421	0.17506
ENSG00000276043	UHRF1	protein_coding	45.4678	-0.372404	0.160311	-2.32301	0.0201789	0.175158
ENSG00000172936	MYD88	protein_coding	10334.6	0.28632	0.123258	2.32293	0.0201828	0.175158
ENSG00000065559	MAP2K4	protein_coding	663.795	0.339543	0.146187	2.32267	0.0201971	0.175158
ENSG00000226989	AL049758.2	processed_pseudogene	1.23503	0.664793	0.28626	2.32234	0.0202147	NA
ENSG00000169991	IFFO2	protein_coding	715.819	-0.376212	0.162	-2.3223	0.0202169	0.175203
ENSG00000182446	NPLOC4	protein_coding	2963.84	-0.182212	0.0784939	-2.32135	0.0202679	0.175519
ENSG00000163145	C1QTNF7	protein_coding	1.42823	0.68742	0.296146	2.32122	0.0202751	NA
ENSG00000263961	C1orf186	protein_coding	11.6172	-0.678239	0.292285	-2.32047	0.0203155	NA
ENSG00000084764	MAPRE3	protein_coding	137.819	0.305836	0.131816	2.32018	0.0203313	0.175843
ENSG00000140988	RPS2	protein_coding	24314.1	-0.344626	0.148538	-2.32012	0.0203346	0.175843
ENSG00000144120	TMEM177	protein_coding	7.43862	-0.639065	0.275545	-2.31928	0.0203799	NA
ENSG00000139618	BRCA2	protein_coding	59.2749	0.464177	0.200151	2.31913	0.020388	0.176178
ENSG00000277203	F8A1	protein_coding	187.753	-0.425346	0.183477	-2.31825	0.020436	0.176249
ENSG00000214717	ZBED1	protein_coding	1891.73	-0.316243	0.136421	-2.31814	0.0204418	0.176249
ENSG00000138459	SLC35A5	protein_coding	793.451	0.368117	0.158826	2.31774	0.0204635	0.176249
ENSG00000187713	TMEM203	protein_coding	505.479	-0.36082	0.155684	-2.31764	0.0204692	0.176249
ENSG00000090612	ZNF268	protein_coding	100.566	0.266065	0.114801	2.31763	0.0204695	0.176249
ENSG00000011478	QPCTL	protein_coding	128.609	-0.321878	0.138918	-2.31704	0.0205013	0.176396
ENSG00000129226	CD68	protein_coding	11.395	0.627891	0.271019	2.31678	0.0205157	NA
ENSG00000099284	H2AFY2	protein_coding	51.9827	0.577886	0.249576	2.31548	0.0205869	0.176547
ENSG00000114209	PDCD10	protein_coding	756.945	0.277044	0.119652	2.31541	0.0205907	0.176547
ENSG00000028116	VRK2	protein_coding	586.274	0.340374	0.147054	2.31461	0.0206343	0.176547
ENSG00000082512	TRAF5	protein_coding	88.4814	0.400937	0.173227	2.31451	0.0206396	0.176547
ENSG00000161791	FMNL3	protein_coding	350.014	-0.385751	0.166696	-2.3141	0.0206621	0.176547
ENSG00000089723	OTUB2	protein_coding	19.5478	-0.434437	0.187755	-2.31385	0.0206761	NA
ENSG00000108312	UBTF	protein_coding	1504.15	-0.19431	0.0839771	-2.31384	0.0206762	0.176547
ENSG00000079257	LXN	protein_coding	71.0829	0.460419	0.198986	2.31383	0.020677	0.176547
ENSG00000108557	RAI1	protein_coding	486.165	-0.281437	0.121635	-2.31378	0.0206799	0.176547
ENSG00000196597	ZNF782	protein_coding	46.9313	0.360632	0.155903	2.31318	0.0207127	0.176547
ENSG00000163840	DTX3L	protein_coding	1463.49	0.452839	0.195788	2.31291	0.0207275	0.176547
ENSG00000179862	CITED4	protein_coding	219.43	-0.552267	0.238779	-2.31288	0.020729	0.176547
ENSG00000197536	C5orf56	protein_coding	227.178	0.332045	0.143572	2.31275	0.0207365	0.176547
ENSG00000119522	DENND1A	protein_coding	2403.03	-0.284789	0.123139	-2.31275	0.0207365	0.176547
ENSG00000228343	RP11-1148L6.5	antisense	73.7226	-0.332462	0.143754	-2.31271	0.0207386	0.176547
ENSG00000133119	RFC3	protein_coding	125.278	0.286882	0.124046	2.3127	0.0207391	0.176547
ENSG00000139350	NEDD1	protein_coding	291.312	0.322506	0.139532	2.31134	0.0208142	0.177061
ENSG00000158270	COLEC12	protein_coding	43.2723	-0.671538	0.290582	-2.31101	0.0208322	0.177088
ENSG00000165572	KBTBD6	protein_coding	31.2012	-0.492986	0.213388	-2.31028	0.0208726	0.177183
ENSG00000136021	SCYL2	protein_coding	1605.3	0.177791	0.0769566	2.31028	0.0208728	0.177183
ENSG00000019991	HGF	protein_coding	535.671	0.367723	0.159203	2.30978	0.0209004	0.177292
ENSG00000138286	FAM149B1	protein_coding	351.446	0.240602	0.10418	2.30949	0.0209165	0.177304
ENSG00000188735	TMEM120B	protein_coding	71.9516	-0.377583	0.163529	-2.30897	0.0209452	0.177422
ENSG00000085552	IGSF9	protein_coding	5.25936	0.700349	0.303373	2.30854	0.0209691	NA
ENSG00000255479	RP11-672A2.6	lincRNA	2.88489	0.699063	0.302823	2.30849	0.0209721	NA
ENSG00000124731	TREM1	protein_coding	7326.07	0.49143	0.212935	2.30788	0.0210056	0.177732
ENSG00000114904	NEK4	protein_coding	665.52	0.322705	0.139834	2.30778	0.0210114	0.177732
ENSG00000124116	WFDC3	protein_coding	2.27756	-0.6952	0.301271	-2.30756	0.0210236	NA
ENSG00000270141	TERC	lincRNA	0.344557	-0.505525	0.219118	-2.30709	0.02105	NA
ENSG00000231079	AC105402.4	antisense	0.689563	0.584641	0.253441	2.30681	0.0210652	NA
ENSG00000196747	HIST1H2AI	protein_coding	1.23387	0.67711	0.293658	2.30578	0.021123	NA
ENSG00000151665	PIGF	protein_coding	108.553	0.360789	0.156506	2.30527	0.0211514	0.17879
ENSG00000110917	MLEC	protein_coding	854.768	-0.241645	0.104894	-2.30371	0.021239	0.179405
ENSG00000100129	EIF3L	protein_coding	6619.14	-0.323399	0.140447	-2.30264	0.0212993	0.179788
ENSG00000100554	ATP6V1D	protein_coding	717.553	0.368226	0.159979	2.30172	0.0213511	0.180098
ENSG00000260368	RP11-521I2.3	sense_overlapping	2.82164	0.692392	0.300818	2.3017	0.0213524	NA
ENSG00000134242	PTPN22	protein_coding	776.179	0.281583	0.122369	2.30109	0.0213863	0.180267
ENSG00000177666	PNPLA2	protein_coding	2631.17	-0.281542	0.122365	-2.30083	0.0214011	0.180267
ENSG00000182606	TRAK1	protein_coding	2979.46	-0.177299	0.0770977	-2.29966	0.0214675	0.180672
ENSG00000170836	PPM1D	protein_coding	453.849	-0.290269	0.126234	-2.29945	0.0214793	0.180672
ENSG00000172250	SERHL	processed_transcript	7.42467	-0.683549	0.297286	-2.2993	0.0214879	NA
ENSG00000105373	GLTSCR2	protein_coding	7451.69	-0.302174	0.131432	-2.29909	0.0214998	0.180718
ENSG00000072415	MPP5	protein_coding	245.733	-0.261884	0.113948	-2.29828	0.0215457	0.180883
ENSG00000103266	STUB1	protein_coding	458.453	-0.271198	0.118005	-2.2982	0.0215505	0.180883
ENSG00000170190	SLC16A5	protein_coding	867.455	-0.238383	0.103737	-2.29795	0.0215645	0.180883
ENSG00000168005	C11orf84	protein_coding	94.7817	-0.404019	0.175855	-2.29746	0.0215927	0.180987
ENSG00000117009	KMO	protein_coding	148.178	0.449403	0.195668	2.29676	0.0216322	0.180987
ENSG00000120738	EGR1	protein_coding	14138.1	-0.681097	0.296555	-2.2967	0.0216361	0.180987
ENSG00000177311	ZBTB38	protein_coding	624.184	-0.369717	0.160979	-2.29668	0.0216371	0.180987
ENSG00000151923	TIAL1	protein_coding	1419.47	0.196499	0.0855721	2.2963	0.0216587	0.181042
ENSG00000143845	ETNK2	protein_coding	0.688938	-0.605575	0.263723	-2.29625	0.0216614	NA
ENSG00000150076	CCDC7	protein_coding	3.77353	0.640272	0.278903	2.29568	0.0216944	NA
ENSG00000205791	LOH12CR2	lincRNA	9.81005	0.519694	0.226413	2.29534	0.0217137	NA
ENSG00000221838	AP4M1	protein_coding	167.341	0.270634	0.117914	2.29517	0.0217235	0.181397
ENSG00000230124	LHX4-AS1	protein_coding	464.666	-0.19214	0.0837201	-2.29503	0.0217314	0.181397
ENSG00000259687	LINC01220	lincRNA	89.6586	0.609817	0.265773	2.2945	0.0217616	0.181523
ENSG00000174206	C12orf66	protein_coding	83.5795	-0.296967	0.129441	-2.29424	0.0217769	0.181525
ENSG00000157782	CABP1	protein_coding	5.67917	0.690549	0.301007	2.29413	0.021783	NA
ENSG00000276213	Metazoa_SRP	misc_RNA	0.614627	-0.595151	0.259453	-2.29387	0.021798	NA
ENSG00000089157	RPLP0	protein_coding	18960.9	-0.27938	0.12187	-2.29244	0.0218802	0.182259
ENSG00000247728	RP11-932O9.7	antisense	1.53587	0.688351	0.300291	2.29227	0.0218898	NA
ENSG00000102910	LONP2	protein_coding	1052.43	0.191164	0.0834437	2.29094	0.0219671	0.182744
ENSG00000159335	PTMS	protein_coding	182.327	-0.373676	0.163113	-2.29091	0.0219688	0.182744
ENSG00000213918	DNASE1	protein_coding	168.307	0.489987	0.213966	2.29002	0.0220203	0.183045
ENSG00000268858	RP4-591C20.9	antisense	104.428	0.26134	0.114143	2.28958	0.0220454	0.183128
ENSG00000237298	TTN-AS1	antisense	46.3688	0.44447	0.194161	2.28918	0.0220688	0.183196
ENSG00000165506	DNAAF2	protein_coding	131.377	-0.360311	0.157432	-2.28868	0.0220977	0.183274
ENSG00000269983	RP11-497H16.9	lincRNA	69.6964	-0.399184	0.174443	-2.28833	0.0221184	0.183274
ENSG00000101220	C20orf27	protein_coding	1791.91	-0.417625	0.18251	-2.28823	0.0221241	0.183274
ENSG00000211778	TRAV4	TR_V_gene	0.565256	-0.558103	0.243902	-2.28823	0.0221243	NA
ENSG00000075292	ZNF638	protein_coding	1267.3	0.362982	0.158689	2.28737	0.022174	0.18338
ENSG00000063046	EIF4B	protein_coding	11047.6	-0.315859	0.138098	-2.28721	0.0221834	0.18338
ENSG00000155085	AK9	protein_coding	82.7445	0.311874	0.136365	2.28706	0.0221922	0.18338
ENSG00000105671	DDX49	protein_coding	889.147	-0.240364	0.105108	-2.28683	0.0222058	0.18338
ENSG00000147119	CHST7	protein_coding	365.482	-0.476939	0.20857	-2.2867	0.0222131	0.18338
ENSG00000155252	PI4K2A	protein_coding	869.613	-0.585674	0.256153	-2.28642	0.0222298	0.183392
ENSG00000174276	ZNHIT2	protein_coding	44.4169	-0.468808	0.205092	-2.28584	0.0222635	0.183472
ENSG00000131732	ZCCHC9	protein_coding	325.699	0.21772	0.0952519	2.28573	0.02227	0.183472
ENSG00000123739	PLA2G12A	protein_coding	115.988	0.299	0.130835	2.28533	0.0222934	0.183539
ENSG00000261226	RP11-830F9.7	sense_intronic	14.0907	0.516966	0.22625	2.28493	0.0223166	NA
ENSG00000279355	AGPAT4-IT1	TEC	22.6708	0.656922	0.287564	2.28444	0.022346	NA
ENSG00000100092	SH3BP1	protein_coding	1657.72	-0.357734	0.156617	-2.28414	0.0223636	0.18399
ENSG00000123353	ORMDL2	protein_coding	137.202	0.351952	0.154109	2.28379	0.022384	0.184033
ENSG00000115145	STAM2	protein_coding	601.274	0.276526	0.12111	2.28327	0.0224145	0.184157
ENSG00000243313	RN7SL285P	misc_RNA	0.594134	0.538398	0.235922	2.2821	0.0224834	NA
ENSG00000100601	ALKBH1	protein_coding	117.555	-0.284178	0.124539	-2.28185	0.0224982	0.184704
ENSG00000260823	RP11-249C24.10	lincRNA	0.302648	0.460175	0.201669	2.28183	0.0224991	NA
ENSG00000280027	RP11-44F14.10	TEC	3.05683	0.691761	0.30317	2.28176	0.0225036	NA
ENSG00000156873	PHKG2	protein_coding	640.497	-0.174197	0.0763478	-2.28162	0.0225117	0.184704
ENSG00000167716	WDR81	protein_coding	1363.01	-0.258585	0.113352	-2.28126	0.0225331	0.184753
ENSG00000260975	RP11-142G1.3	lincRNA	2.90838	0.689231	0.302162	2.281	0.0225487	NA
ENSG00000115935	WIPF1	protein_coding	5858.32	0.284558	0.124762	2.28081	0.0225595	0.184843
ENSG00000213672	NCKIPSD	protein_coding	186.826	-0.305687	0.134042	-2.28054	0.0225756	0.184849
ENSG00000114383	TUSC2	protein_coding	523.943	-0.267461	0.117299	-2.28017	0.0225976	0.184903
ENSG00000280270	RP11-560F18.1	TEC	0.444797	0.523018	0.229397	2.27997	0.0226097	NA
ENSG00000269918	AF131215.9	sense_intronic	4.92551	0.656226	0.287948	2.27898	0.0226685	NA
ENSG00000072756	TRNT1	protein_coding	141.353	0.283667	0.124474	2.27892	0.022672	0.185297
ENSG00000254944	ATP5F1P5	processed_pseudogene	1.33963	0.673691	0.295625	2.27887	0.0226746	NA
ENSG00000275023	MLLT6	protein_coding	2093.64	-0.242355	0.106351	-2.27881	0.0226781	0.185297
ENSG00000259367	RP11-815J21.4	antisense	1.1276	0.639437	0.28062	2.27866	0.0226875	NA
ENSG00000163811	WDR43	protein_coding	807.925	-0.417908	0.183415	-2.27848	0.022698	0.185297
ENSG00000186522	SEPT10	protein_coding	191.716	0.377639	0.165753	2.27832	0.0227074	0.185297
ENSG00000272249	KB-1958F4.2	antisense	0.641983	0.58313	0.256099	2.27697	0.0227881	NA
ENSG00000125648	SLC25A23	protein_coding	9.83053	0.61117	0.268482	2.27639	0.0228224	NA
ENSG00000198252	STYX	protein_coding	889.681	0.284336	0.124911	2.27631	0.0228273	0.186149
ENSG00000171720	HDAC3	protein_coding	1138.81	-0.189441	0.083236	-2.27595	0.0228491	0.186189
ENSG00000224727	FCF1P7	processed_pseudogene	1.54299	0.671714	0.295162	2.27575	0.0228611	NA
ENSG00000271605	MILR1	protein_coding	793.658	0.273382	0.12013	2.27571	0.0228631	0.186189
ENSG00000204949	FAM83A-AS1	antisense	0.484164	-0.523885	0.230253	-2.27525	0.0228909	NA
ENSG00000111328	CDK2AP1	protein_coding	561.827	-0.297736	0.13088	-2.27487	0.0229137	0.186289
ENSG00000167526	RPL13	protein_coding	24285.5	-0.31634	0.13907	-2.27468	0.0229251	0.186289
ENSG00000164142	FAM160A1	protein_coding	7.82852	-0.643534	0.28293	-2.27454	0.0229337	NA
ENSG00000111641	NOP2	protein_coding	462.164	-0.376115	0.165371	-2.27438	0.0229434	0.186289
ENSG00000171813	PWWP2B	protein_coding	379.24	-0.344117	0.151302	-2.27437	0.0229438	0.186289
ENSG00000136463	TACO1	protein_coding	161.856	-0.257665	0.113298	-2.27422	0.0229529	0.186289
ENSG00000198131	ZNF544	protein_coding	58.2973	0.331193	0.145676	2.2735	0.0229964	0.186316
ENSG00000142409	ZNF787	protein_coding	1238.44	-0.398359	0.175222	-2.27345	0.022999	0.186316
ENSG00000096070	BRPF3	protein_coding	604.678	-0.334397	0.147092	-2.27339	0.0230027	0.186316
ENSG00000204252	HLA-DOA	protein_coding	612.454	-0.489805	0.215489	-2.273	0.0230264	0.186382
ENSG00000165837	ERICH6B	protein_coding	2.53006	0.684153	0.301022	2.27277	0.0230403	NA
ENSG00000224138	AC000123.4	antisense	10.1502	0.637207	0.280388	2.27259	0.0230509	NA
ENSG00000162298	SYVN1	protein_coding	923.843	-0.239112	0.105257	-2.2717	0.0231045	0.186888
ENSG00000115053	NCL	protein_coding	7378.84	-0.158137	0.0696461	-2.27058	0.0231722	0.187143
ENSG00000103365	GGA2	protein_coding	2156.2	-0.231244	0.101858	-2.27026	0.0231917	0.187143
ENSG00000197302	ZNF720	protein_coding	117.037	0.374672	0.165041	2.27017	0.0231974	0.187143
ENSG00000063244	U2AF2	protein_coding	3646.82	-0.186591	0.0821932	-2.27015	0.0231982	0.187143
ENSG00000182700	IGIP	protein_coding	13.1489	0.597392	0.263188	2.26983	0.023218	NA
ENSG00000072952	MRVI1	protein_coding	315.346	0.374692	0.165096	2.26954	0.0232357	0.187319
ENSG00000280249	AL691477.1	pseudogene	0.179722	0.371123	0.163536	2.26937	0.0232456	NA
ENSG00000259924	RP11-16E23.4	processed_pseudogene	2.4993	0.683818	0.301373	2.26901	0.0232677	NA
ENSG00000093167	LRRFIP2	protein_coding	1348.58	0.324224	0.142919	2.26859	0.0232934	0.187438
ENSG00000183475	ASB7	protein_coding	392.186	-0.306794	0.135241	-2.26849	0.0232992	0.187438
ENSG00000269420	CTD-2265M8.2	antisense	0.287403	0.448516	0.197745	2.26815	0.0233198	NA
ENSG00000135605	TEC	protein_coding	122.097	0.323234	0.14252	2.26799	0.0233298	0.187438
ENSG00000175591	P2RY2	protein_coding	402.883	-0.388856	0.171461	-2.2679	0.0233355	0.187438
ENSG00000204524	ZNF805	protein_coding	107.892	-0.354568	0.156361	-2.26762	0.0233522	0.187438
ENSG00000136960	ENPP2	protein_coding	42.9107	0.585125	0.258043	2.26755	0.0233567	0.187438
ENSG00000106399	RPA3	protein_coding	153.804	0.294941	0.130073	2.2675	0.0233595	0.187438
ENSG00000125571	IL37	protein_coding	0.233083	0.413801	0.182537	2.26694	0.0233939	NA
ENSG00000079313	REXO1	protein_coding	931.825	-0.359957	0.158834	-2.26625	0.023436	0.187926
ENSG00000270898	GPR75-ASB3	protein_coding	0.415662	0.534424	0.235852	2.26593	0.0234559	NA
ENSG00000238366	Y_RNA	misc_RNA	3.01166	0.687185	0.303362	2.26523	0.0234985	NA
ENSG00000258215	RP11-299A16.1	processed_pseudogene	0.177617	0.369905	0.163303	2.26515	0.0235035	NA
ENSG00000117691	NENF	protein_coding	335.507	-0.287683	0.127014	-2.26497	0.0235148	0.188432
ENSG00000184675	AMER1	protein_coding	147.716	-0.382623	0.168992	-2.26415	0.0235651	0.188488
ENSG00000279565	RP4-570O12.3	TEC	0.444244	0.483367	0.21352	2.2638	0.0235865	NA
ENSG00000141076	CIRH1A	protein_coding	412.728	-0.280554	0.123943	-2.26357	0.0236005	0.188488
ENSG00000170921	TANC2	protein_coding	314.421	-0.333357	0.147273	-2.26353	0.0236029	0.188488
ENSG00000128335	APOL2	protein_coding	545.3	0.414131	0.182967	2.26343	0.0236094	0.188488
ENSG00000143156	NME7	protein_coding	44.4104	0.405374	0.179103	2.26336	0.0236134	0.188488
ENSG00000155970	MICU3	protein_coding	1.37465	0.681642	0.301171	2.2633	0.0236169	NA
ENSG00000177683	THAP5	protein_coding	273.213	0.313978	0.138734	2.26316	0.0236256	0.188488
ENSG00000280008	RP11-652L8.4	TEC	187.648	-0.289458	0.127905	-2.26307	0.0236316	0.188488
ENSG00000136937	NCBP1	protein_coding	538.277	0.214455	0.0947942	2.26232	0.0236778	0.188732
ENSG00000262155	RP11-266L9.5	lincRNA	4.54146	0.625884	0.276681	2.26211	0.0236903	NA
ENSG00000115657	ABCB6	protein_coding	1.90851	0.683789	0.302338	2.26167	0.0237179	NA
ENSG00000087365	SF3B2	protein_coding	4888.51	-0.188193	0.0832159	-2.2615	0.0237283	0.189009
ENSG00000267676	THA1P	unitary_pseudogene	0.344667	-0.489795	0.216657	-2.2607	0.0237781	NA
ENSG00000254224	KB-1043D8.6	antisense	0.211955	-0.379961	0.168096	-2.26038	0.0237975	NA
ENSG00000264421	RP11-401F2.4	antisense	0.175165	0.368462	0.163026	2.26014	0.0238126	NA
ENSG00000260298	RP11-429P3.4	transcribed_processed_pseudogene	0.174825	0.368286	0.162992	2.25954	0.0238498	NA
ENSG00000185716	C16orf52	protein_coding	123.455	0.369901	0.163738	2.2591	0.023877	0.190067
ENSG00000135924	DNAJB2	protein_coding	503.816	0.225909	0.100038	2.25824	0.0239309	0.19008
ENSG00000147155	EBP	protein_coding	285.135	-0.183939	0.0814529	-2.25822	0.0239318	0.19008
ENSG00000143126	CELSR2	protein_coding	113.387	-0.348263	0.154228	-2.2581	0.0239393	0.19008
ENSG00000101216	GMEB2	protein_coding	647.873	-0.448504	0.198623	-2.25806	0.0239419	0.19008
ENSG00000273828	RP11-394O2.3	antisense	3.41484	0.671366	0.29763	2.25571	0.024089	NA
ENSG00000155438	NIFK	protein_coding	448.05	-0.239055	0.105997	-2.25531	0.0241142	0.191322
ENSG00000222287	RNU6-1043P	snRNA	0.477793	0.528915	0.234543	2.25508	0.024128	NA
ENSG00000080603	SRCAP	protein_coding	3042.92	-0.254934	0.11307	-2.25466	0.0241548	0.19141
ENSG00000106560	GIMAP2	protein_coding	1807.36	0.405826	0.179998	2.25462	0.0241572	0.19141
ENSG00000254681	PKD1P5	transcribed_unprocessed_pseudogene	78.037	-0.682542	0.30281	-2.25403	0.0241944	0.191579
ENSG00000112367	FIG4	protein_coding	1366.23	0.286395	0.127128	2.25281	0.024271	0.192059
ENSG00000133401	PDZD2	protein_coding	10.8498	0.589444	0.261667	2.25265	0.024281	NA
ENSG00000135245	HILPDA	protein_coding	11.0176	-0.583807	0.259194	-2.25239	0.0242974	NA
ENSG00000177733	HNRNPA0	protein_coding	4521.52	-0.301958	0.134071	-2.25222	0.0243086	0.192066
ENSG00000149489	ROM1	protein_coding	36.175	-0.348142	0.15459	-2.25204	0.0243196	0.192066
ENSG00000143321	HDGF	protein_coding	4507.32	-0.238042	0.105706	-2.25193	0.0243269	0.192066
ENSG00000163513	TGFBR2	protein_coding	4409.33	-0.174754	0.0776069	-2.25179	0.0243358	0.192066
ENSG00000182950	ODF3L1	protein_coding	1.64159	0.662505	0.294306	2.25107	0.024381	NA
ENSG00000188419	CHM	protein_coding	442.885	0.307837	0.136776	2.25066	0.0244071	0.192284
ENSG00000274307	RP11-345J18.2	sense_intronic	20.5871	0.609079	0.270623	2.25066	0.0244073	NA
ENSG00000148690	FRA10AC1	protein_coding	178.148	0.375012	0.166627	2.2506	0.0244109	0.192284
ENSG00000125652	ALKBH7	protein_coding	838.77	-0.308493	0.137072	-2.25059	0.0244115	0.192284
ENSG00000180198	RCC1	protein_coding	453.735	-0.308741	0.137213	-2.25008	0.0244439	0.192414
ENSG00000151414	NEK7	protein_coding	1633.66	0.3903	0.173538	2.24907	0.024508	0.192657
ENSG00000111110	PPM1H	protein_coding	212.599	-0.335597	0.149222	-2.24898	0.0245136	0.192657
ENSG00000145241	CENPC	protein_coding	507.177	-0.418478	0.186086	-2.24884	0.0245228	0.192657
ENSG00000276747	PADI6	protein_coding	9.91558	-0.656753	0.292063	-2.24867	0.0245338	NA
ENSG00000124688	MAD2L1BP	protein_coding	414.181	-0.296379	0.131811	-2.24852	0.024543	0.192689
ENSG00000108344	PSMD3	protein_coding	1796.68	-0.180799	0.0804519	-2.24729	0.0246214	0.193178
ENSG00000213923	CSNK1E	protein_coding	560.619	-0.312215	0.138965	-2.24672	0.0246582	0.193181
ENSG00000157778	PSMG3	protein_coding	231.187	-0.283672	0.126263	-2.24668	0.0246605	0.193181
ENSG00000102445	KIAA0226L	protein_coding	233.403	0.434713	0.193507	2.24649	0.0246724	0.193181
ENSG00000232677	LINC00665	lincRNA	23.2644	-0.541723	0.241162	-2.2463	0.0246846	NA
ENSG00000117505	DR1	protein_coding	2057.81	-0.203574	0.0906272	-2.24628	0.024686	0.193181
ENSG00000266010	GATA6-AS1	lincRNA	0.204288	-0.375931	0.167377	-2.24602	0.0247029	NA
ENSG00000106348	IMPDH1	protein_coding	5085.7	-0.260528	0.115998	-2.24596	0.0247066	0.193216
ENSG00000274315	RP11-996F15.5	antisense	4.36809	0.650431	0.289602	2.24595	0.0247073	NA
ENSG00000100276	RASL10A	protein_coding	13.4643	0.493937	0.220032	2.24484	0.0247782	NA
ENSG00000171055	FEZ2	protein_coding	786.061	0.219816	0.0979673	2.24377	0.0248475	0.194192
ENSG00000065526	SPEN	protein_coding	4523.16	-0.310799	0.138537	-2.24343	0.0248689	0.194233
ENSG00000075188	NUP37	protein_coding	165.985	0.363188	0.161933	2.24282	0.0249085	0.194238
ENSG00000272086	CTD-2186M15.3	lincRNA	63.7833	-0.330973	0.147578	-2.24269	0.0249167	0.194238
ENSG00000135317	SNX14	protein_coding	1321.86	0.238897	0.106524	2.24266	0.0249185	0.194238
ENSG00000253251	CTC-534A2.2	protein_coding	101.707	-0.390582	0.174189	-2.24229	0.0249425	0.194238
ENSG00000267690	LDLRAD4-AS1	antisense	1.14867	0.593008	0.264471	2.24224	0.0249461	NA
ENSG00000198205	ZXDA	protein_coding	81.2346	-0.310269	0.138379	-2.24217	0.0249504	0.194238
ENSG00000020922	MRE11A	protein_coding	526.316	0.282614	0.12606	2.24191	0.0249672	0.194244
ENSG00000118507	AKAP7	protein_coding	231.048	0.318242	0.141986	2.24137	0.0250022	0.194311
ENSG00000144909	OSBPL11	protein_coding	2160.57	0.215926	0.0963523	2.24101	0.0250257	0.194311
ENSG00000155592	ZKSCAN2	protein_coding	145.665	-0.393709	0.175697	-2.24085	0.025036	0.194311
ENSG00000069329	VPS35	protein_coding	2540.68	0.278518	0.124295	2.24078	0.0250406	0.194311
ENSG00000213613	RP11-380G5.3	processed_pseudogene	7.21127	0.668438	0.298401	2.24007	0.0250866	NA
ENSG00000116497	S100PBP	protein_coding	325.299	0.358769	0.160162	2.24003	0.0250887	0.194316
ENSG00000183578	TNFAIP8L3	protein_coding	4.25708	0.666788	0.297704	2.23977	0.025106	NA
ENSG00000176170	SPHK1	protein_coding	334.359	-0.536578	0.239583	-2.23963	0.0251147	0.194316
ENSG00000183258	DDX41	protein_coding	1654.98	-0.173686	0.0775636	-2.23928	0.0251377	0.194316
ENSG00000153044	CENPH	protein_coding	40.8077	-0.360025	0.160787	-2.23915	0.0251463	0.194316
ENSG00000125538	IL1B	protein_coding	5665.45	0.578311	0.258304	2.23887	0.0251641	0.194316
ENSG00000104885	DOT1L	protein_coding	1123.06	-0.39109	0.174692	-2.23874	0.025173	0.194316
ENSG00000174776	WDR49	protein_coding	101.719	0.499649	0.2232	2.23857	0.0251841	0.194316
ENSG00000105325	FZR1	protein_coding	853.203	-0.34529	0.154256	-2.23842	0.0251935	0.194316
ENSG00000107929	LARP4B	protein_coding	1588.24	0.169814	0.0758671	2.23831	0.0252008	0.194316
ENSG00000229598	PRDX3P1	processed_pseudogene	17.4693	0.637321	0.284762	2.23808	0.0252156	NA
ENSG00000163950	SLBP	protein_coding	1047.68	-0.204614	0.0914281	-2.23798	0.0252223	0.194316
ENSG00000280040	RP11-296E3.2	TEC	0.228238	0.404624	0.180838	2.23749	0.0252543	NA
ENSG00000166971	AKTIP	protein_coding	144.157	0.282782	0.126384	2.23748	0.025255	0.194316
ENSG00000196781	TLE1	protein_coding	56.9333	-0.490812	0.21936	-2.23747	0.0252555	0.194316
ENSG00000123405	NFE2	protein_coding	1121.3	0.384774	0.171974	2.23739	0.0252606	0.194316
ENSG00000003509	NDUFAF7	protein_coding	177.686	0.293857	0.131357	2.23709	0.0252805	0.194316
ENSG00000140950	TLDC1	protein_coding	90.7362	0.318288	0.142281	2.23704	0.0252837	0.194316
ENSG00000158195	WASF2	protein_coding	6919.46	-0.207315	0.0926863	-2.23674	0.0253032	0.194341
ENSG00000205111	CDKL4	protein_coding	0.524382	0.545385	0.243899	2.23612	0.0253442	NA
ENSG00000134504	KCTD1	protein_coding	13.2423	0.582572	0.260553	2.23591	0.0253577	NA
ENSG00000182885	GPR97	protein_coding	98.2333	0.675448	0.302206	2.23506	0.0254136	0.194964
ENSG00000124356	STAMBP	protein_coding	647.105	0.244684	0.109485	2.23487	0.0254258	0.194964
ENSG00000168818	STX18	protein_coding	515.105	0.215363	0.0963695	2.23476	0.0254329	0.194964
ENSG00000164830	OXR1	protein_coding	1398.87	0.292704	0.131009	2.23423	0.0254681	0.195109
ENSG00000173868	PHOSPHO1	protein_coding	162.366	0.504211	0.225734	2.23365	0.0255062	0.195242
ENSG00000198954	KIAA1279	protein_coding	79.9391	0.352611	0.157876	2.23347	0.0255179	0.195242
ENSG00000119335	SET	protein_coding	6032.02	-0.233421	0.104546	-2.2327	0.0255688	0.195507
ENSG00000249664	CTD-2227C6.2	lincRNA	1.90094	0.662981	0.296987	2.23236	0.0255914	NA
ENSG00000198791	CNOT7	protein_coding	2062.48	-0.17171	0.0769487	-2.23149	0.025649	0.195961
ENSG00000119203	CPSF3	protein_coding	592.826	0.26097	0.116958	2.23131	0.0256608	0.195961
ENSG00000226756	AC007365.3	lincRNA	3.55297	0.639775	0.28682	2.23058	0.0257087	NA
ENSG00000159131	GART	protein_coding	491.289	0.37347	0.167447	2.23038	0.0257224	0.196288
ENSG00000048140	TSPAN17	protein_coding	812.94	-0.197705	0.0886564	-2.23002	0.0257464	0.196288
ENSG00000167552	TUBA1A	protein_coding	11451	0.394818	0.17707	2.22973	0.0257657	0.196288
ENSG00000160767	FAM189B	protein_coding	382.41	-0.323473	0.145093	-2.22942	0.0257857	0.196288
ENSG00000080546	SESN1	protein_coding	261.104	0.392092	0.175874	2.2294	0.0257876	0.196288
ENSG00000223546	LINC00630	lincRNA	9.3047	0.514058	0.230615	2.22908	0.0258088	NA
ENSG00000162881	OXER1	protein_coding	116.232	-0.353999	0.158829	-2.22881	0.0258264	0.196288
ENSG00000129292	PHF20L1	protein_coding	1521.05	0.241705	0.108447	2.22878	0.0258283	0.196288
ENSG00000196776	CD47	protein_coding	2651.04	0.189536	0.0850463	2.22862	0.0258389	0.196288
ENSG00000163686	ABHD6	protein_coding	150.617	0.288164	0.129311	2.22845	0.0258505	0.196288
ENSG00000115392	FANCL	protein_coding	192.626	0.311789	0.139942	2.22799	0.0258813	0.196293
ENSG00000167618	LAIR2	protein_coding	8.09401	0.634941	0.284999	2.22787	0.0258892	NA
ENSG00000155959	VBP1	protein_coding	587.981	0.286554	0.128628	2.22777	0.0258956	0.196293
ENSG00000257167	TMPO-AS1	antisense	55.6415	0.401447	0.180207	2.2277	0.0259002	0.196293
ENSG00000185115	NDNL2	protein_coding	453.605	-0.222318	0.0998203	-2.22718	0.0259354	0.19631
ENSG00000143537	ADAM15	protein_coding	3550.17	-0.305073	0.136978	-2.22718	0.0259354	0.19631
ENSG00000102081	FMR1	protein_coding	1050.26	0.228485	0.1026	2.22694	0.0259514	0.19631
ENSG00000224370	RP11-814E24.3	processed_pseudogene	1.71167	0.664992	0.298632	2.22679	0.0259612	NA
ENSG00000262714	RP11-44F14.8	lincRNA	6.20085	0.639779	0.287323	2.22669	0.0259678	NA
ENSG00000262904	TMPOP2	processed_pseudogene	0.540765	0.578416	0.25983	2.22613	0.0260054	NA
ENSG00000148358	GPR107	protein_coding	1671.7	-0.153739	0.0690664	-2.22596	0.0260171	0.196666
ENSG00000232528	RP4-673D20.3	unitary_pseudogene	20.2848	0.447314	0.200955	2.22595	0.0260178	NA
ENSG00000204469	PRRC2A	protein_coding	5049.1	-0.227898	0.1024	-2.22556	0.0260438	0.196666
ENSG00000164916	FOXK1	protein_coding	780.771	-0.343942	0.154552	-2.22542	0.0260533	0.196666
ENSG00000163684	RPP14	protein_coding	191.821	-0.252742	0.113579	-2.22526	0.026064	0.196666
ENSG00000237803	LINC00211	lincRNA	33.4581	0.458292	0.206012	2.22459	0.0261088	0.196774
ENSG00000139636	LMBR1L	protein_coding	874.082	0.288679	0.129769	2.22456	0.0261111	0.196774
ENSG00000262484	CCER2	protein_coding	4.07284	-0.657829	0.295775	-2.22409	0.0261427	NA
ENSG00000074071	MRPS34	protein_coding	703.157	-0.328634	0.14778	-2.2238	0.0261618	0.197026
ENSG00000112996	MRPS30	protein_coding	422.488	-0.211799	0.0952616	-2.22334	0.026193	0.197026
ENSG00000104918	RETN	protein_coding	424.225	0.560285	0.252003	2.22333	0.0261937	0.197026
ENSG00000121749	TBC1D15	protein_coding	894.238	0.179792	0.080917	2.22194	0.0262876	0.197609
[truncated: 1,009 more rows]

## Sheet: HC_dcSSc
	Gene Name	Gene Type	baseMean	log2FoldChange	lfcSE	stat	pvalue	padj
ENSG00000118113	MMP8	protein_coding	9.65741	1.64694	0.291333	5.65313	1.57556e-08	NA
ENSG00000012223	LTF	protein_coding	54.944	1.5224	0.270593	5.62618	1.84245e-08	0.000253909
ENSG00000170385	SLC30A1	protein_coding	1767.67	-0.773873	0.143776	-5.38249	7.34638e-08	0.000458468
ENSG00000206337	HCP5	sense_overlapping	490.231	0.779303	0.146291	5.32708	9.98043e-08	0.000458468
ENSG00000073737	DHRS9	protein_coding	180.528	1.29328	0.257174	5.02882	4.93507e-07	0.00170026
ENSG00000100473	COCH	protein_coding	15.6316	1.45858	0.297447	4.90367	9.40622e-07	0.00217842
ENSG00000141582	CBX4	protein_coding	1690.67	-0.598261	0.122447	-4.88587	1.02971e-06	0.00217842
ENSG00000007944	MYLIP	protein_coding	1319.68	-0.933065	0.191528	-4.87168	1.10652e-06	0.00217842
ENSG00000173930	SLCO4C1	protein_coding	156.168	0.840536	0.175244	4.79638	1.6156e-06	0.00278307
ENSG00000029153	ARNTL2	protein_coding	97.8938	0.907367	0.191367	4.74151	2.12131e-06	0.00305541
ENSG00000198019	FCGR1B	protein_coding	281.736	1.21536	0.256808	4.73255	2.21712e-06	0.00305541
ENSG00000084093	REST	protein_coding	1260.83	-0.67952	0.146037	-4.65307	3.27035e-06	0.00397121
ENSG00000100335	MIEF1	protein_coding	1002.29	-0.572011	0.123237	-4.64155	3.45799e-06	0.00397121
ENSG00000127954	STEAP4	protein_coding	899.993	0.938988	0.205247	4.57492	4.764e-06	0.0050502
ENSG00000148346	LCN2	protein_coding	9.06328	1.27189	0.280287	4.53781	5.68423e-06	NA
ENSG00000138772	ANXA3	protein_coding	32.7085	1.37645	0.303417	4.5365	5.71959e-06	0.00518708
ENSG00000188811	NHLRC3	protein_coding	573.206	0.524035	0.115659	4.53086	5.8743e-06	0.00518708
ENSG00000144485	HES6	protein_coding	58.4949	-0.72978	0.161256	-4.5256	6.0223e-06	0.00518708
ENSG00000265808	SEC22B	protein_coding	1333.1	0.525892	0.116645	4.50847	6.52981e-06	0.00529337
ENSG00000100811	YY1	protein_coding	3463.72	-0.368349	0.0828852	-4.44408	8.8267e-06	0.00646442
ENSG00000105516	DBP	protein_coding	295.786	-0.902234	0.203771	-4.42769	9.52464e-06	0.00646442
ENSG00000176749	CDK5R1	protein_coding	106.531	-1.08044	0.244071	-4.42676	9.56597e-06	0.00646442
ENSG00000120885	CLU	protein_coding	333.335	1.34043	0.303236	4.42042	9.85072e-06	0.00646442
ENSG00000135966	TGFBRAP1	protein_coding	1220.03	-0.389149	0.0885629	-4.39404	1.11262e-05	0.00696955
ENSG00000026751	SLAMF7	protein_coding	671.689	1.2131	0.277635	4.3694	1.24591e-05	0.00746517
ENSG00000004961	HCCS	protein_coding	403.996	0.405061	0.0939488	4.31151	1.62143e-05	0.00931041
ENSG00000179833	SERTAD2	protein_coding	2969.4	-0.648872	0.151306	-4.28849	1.79895e-05	0.00991653
ENSG00000109906	ZBTB16	protein_coding	217.108	-1.23991	0.291077	-4.25971	2.04691e-05	0.0108494
ENSG00000169018	FEM1B	protein_coding	2156.26	-0.477674	0.112782	-4.23537	2.28173e-05	0.0116461
ENSG00000012822	CALCOCO1	protein_coding	2112.27	0.308555	0.073068	4.22286	2.41227e-05	0.0118727
ENSG00000126351	THRA	protein_coding	475.948	-0.893972	0.212127	-4.21432	2.50536e-05	0.0119057
ENSG00000278869	CITF22-49E9.3	lincRNA	19.8399	0.996936	0.238376	4.1822	2.88706e-05	0.0132622
ENSG00000110324	IL10RA	protein_coding	18953.3	-0.464933	0.111912	-4.15444	3.26084e-05	0.014496
ENSG00000189319	FAM53B	protein_coding	2273.6	-0.510452	0.123758	-4.1246	3.71382e-05	0.0159938
ENSG00000179454	KLHL28	protein_coding	414.32	-0.515466	0.125771	-4.09846	4.15907e-05	0.0165625
ENSG00000270959	LPP-AS2	antisense	56.7356	0.640789	0.156557	4.09301	4.25814e-05	0.0165625
ENSG00000181894	ZNF329	protein_coding	73.4874	-0.837619	0.204795	-4.09004	4.31306e-05	0.0165625
ENSG00000172409	CLP1	protein_coding	405.409	-0.685959	0.167744	-4.08931	4.3266e-05	0.0165625
ENSG00000104267	CA2	protein_coding	195.712	0.815644	0.20025	4.07314	4.63836e-05	0.0170098
ENSG00000087502	ERGIC2	protein_coding	271.422	0.63828	0.156805	4.07055	4.69032e-05	0.0170098
ENSG00000180061	TMEM150B	protein_coding	365.208	0.643796	0.158567	4.06008	4.90557e-05	0.0170443
ENSG00000153487	ING1	protein_coding	1251.14	-0.611661	0.150726	-4.05811	4.94719e-05	0.0170443
ENSG00000166278	C2	protein_coding	99.4643	1.17	0.289227	4.04527	5.22635e-05	0.0173981
ENSG00000196655	TRAPPC4	protein_coding	285.332	0.576052	0.142675	4.0375	5.40229e-05	0.0173981
ENSG00000136231	IGF2BP3	protein_coding	46.1877	0.969531	0.24052	4.03097	5.55463e-05	0.0173981
ENSG00000186281	GPAT2	protein_coding	22.464	-1.17714	0.29214	-4.02938	5.59235e-05	0.0173981
ENSG00000124383	MPHOSPH10	protein_coding	490.519	-0.534096	0.132672	-4.02568	5.68111e-05	0.0173981
ENSG00000113460	BRIX1	protein_coding	231.318	-0.573913	0.14306	-4.01168	6.02885e-05	0.0180617
ENSG00000072415	MPP5	protein_coding	245.733	-0.509047	0.127368	-3.99665	6.42446e-05	0.0187388
ENSG00000104432	IL7	protein_coding	20.9638	0.918527	0.23004	3.99291	6.52682e-05	0.0187388
ENSG00000130720	FIBCD1	protein_coding	2.65935	-1.16089	0.291875	-3.97735	6.96867e-05	NA
ENSG00000272398	CD24	protein_coding	11.6996	1.19366	0.3004	3.97357	7.08024e-05	0.0199128
ENSG00000150337	FCGR1A	protein_coding	1071.48	1.01009	0.25544	3.95431	7.67562e-05	0.0203655
ENSG00000213064	SFT2D2	protein_coding	2633.43	-0.509033	0.128745	-3.9538	7.69196e-05	0.0203655
ENSG00000266288	CTD-3096M3.2	lincRNA	4.91123	-1.13547	0.287422	-3.95053	7.79779e-05	NA
ENSG00000181704	YIPF6	protein_coding	359.59	0.527979	0.133905	3.94295	8.0487e-05	0.0203655
ENSG00000077420	APBB1IP	protein_coding	3158.06	0.551525	0.139877	3.94293	8.04918e-05	0.0203655
ENSG00000169083	AR	protein_coding	2.50791	-1.18591	0.300886	-3.94138	8.10129e-05	NA
ENSG00000233029	RP11-439A17.9	antisense	18.7868	1.09445	0.277878	3.93859	8.19607e-05	0.0203655
ENSG00000188070	C11orf95	protein_coding	133.49	-0.651719	0.165492	-3.93806	8.21439e-05	0.0203655
ENSG00000011007	TCEB3	protein_coding	1250.81	-0.384041	0.0975646	-3.93627	8.27566e-05	0.0203655
ENSG00000080822	CLDND1	protein_coding	539.186	0.459512	0.116955	3.92896	8.53147e-05	0.0206267
ENSG00000183337	BCOR	protein_coding	886.557	-0.789476	0.201813	-3.91192	9.15635e-05	0.0208557
ENSG00000108826	MRPL27	protein_coding	279.565	0.461685	0.118048	3.91098	9.19223e-05	0.0208557
ENSG00000109686	SH3D19	protein_coding	54.2965	-0.923358	0.237781	-3.88323	0.000103079	0.0208557
ENSG00000062598	ELMO2	protein_coding	1096.17	0.484074	0.124824	3.87805	0.000105295	0.0208557
ENSG00000115816	CEBPZ	protein_coding	500.764	-0.494276	0.127526	-3.87588	0.000106242	0.0208557
ENSG00000181220	ZNF746	protein_coding	783.063	-0.561388	0.144875	-3.87498	0.000106635	0.0208557
ENSG00000100336	APOL4	protein_coding	68.2305	1.07554	0.277845	3.87101	0.000108385	0.0208557
ENSG00000134061	CD180	protein_coding	412.786	1.01538	0.262444	3.86895	0.000109304	0.0208557
ENSG00000171604	CXXC5	protein_coding	1248.7	-0.942768	0.243743	-3.86788	0.000109787	0.0208557
ENSG00000185127	C6orf120	protein_coding	483.618	0.383747	0.0993329	3.86324	0.000111893	0.0208557
ENSG00000024862	CCDC28A	protein_coding	422.128	0.512915	0.132873	3.86019	0.000113299	0.0208557
ENSG00000165060	FXN	protein_coding	174.354	-0.510569	0.132289	-3.8595	0.000113619	0.0208557
ENSG00000172366	FAM195A	protein_coding	441.802	-0.579064	0.150061	-3.85884	0.000113924	0.0208557
ENSG00000142798	HSPG2	protein_coding	26.2833	-0.947122	0.245751	-3.85398	0.000116211	0.0208557
ENSG00000178977	LINC00324	lincRNA	168.061	0.729249	0.189272	3.85292	0.000116717	0.0208557
ENSG00000125089	SH3TC1	protein_coding	3119.52	-0.530031	0.137575	-3.85266	0.000116843	0.0208557
ENSG00000279908	RP11-325I22.3	TEC	12.2584	-0.898645	0.233554	-3.8477	0.000119232	0.0208557
ENSG00000113532	ST8SIA4	protein_coding	1813.85	0.501488	0.130721	3.83632	0.000124893	0.0208557
ENSG00000154429	CCSAP	protein_coding	832.841	-0.488797	0.127577	-3.83139	0.000127422	0.0208557
ENSG00000100342	APOL1	protein_coding	749.239	0.81333	0.212397	3.82929	0.000128511	0.0208557
ENSG00000156983	BRPF1	protein_coding	1498.79	-0.657207	0.171629	-3.82924	0.00012854	0.0208557
ENSG00000156030	ELMSAN1	protein_coding	2492.21	-0.67809	0.177254	-3.82554	0.000130488	0.0208557
ENSG00000004660	CAMKK1	protein_coding	364.841	-0.693429	0.181309	-3.82456	0.000131003	0.0208557
ENSG00000278996	CH507-513H4.1	lincRNA	21.1889	0.97036	0.253748	3.82411	0.000131244	0.0208557
ENSG00000170191	NANP	protein_coding	112.286	-0.605717	0.158399	-3.82399	0.000131308	0.0208557
ENSG00000110002	VWA5A	protein_coding	221.982	0.615066	0.160851	3.82382	0.000131399	0.0208557
ENSG00000172716	SLFN11	protein_coding	1499.27	0.53673	0.140388	3.8232	0.000131731	0.0208557
ENSG00000087269	NOP14	protein_coding	429.91	-0.284564	0.0744574	-3.82183	0.000132465	0.0208557
ENSG00000174456	C12orf76	protein_coding	159.152	0.552109	0.144559	3.81927	0.000133846	0.0208557
ENSG00000155640	C10orf12	protein_coding	196.611	-0.632588	0.165658	-3.81864	0.000134188	0.0208557
ENSG00000182580	EPHB3	protein_coding	80.9357	1.14303	0.299386	3.81791	0.000134586	0.0208557
ENSG00000005302	MSL3	protein_coding	1594.79	0.343613	0.0900444	3.81604	0.000135609	0.0208557
ENSG00000196781	TLE1	protein_coding	56.9333	-0.907446	0.238101	-3.81119	0.000138301	0.0208557
ENSG00000101665	SMAD7	protein_coding	372.455	-0.943353	0.247527	-3.81111	0.000138346	0.0208557
ENSG00000105085	MED26	protein_coding	166.268	-0.700768	0.183976	-3.80902	0.000139519	0.0208557
ENSG00000183955	SETD8	protein_coding	787.24	-0.464756	0.122084	-3.80686	0.000140743	0.0208557
ENSG00000260063	RP5-968P14.2	antisense	14.2666	0.80765	0.212859	3.7943	0.000148061	0.0216219
ENSG00000127423	AUNIP	protein_coding	21.2659	-0.778206	0.205188	-3.79264	0.000149052	0.0216219
ENSG00000163568	AIM2	protein_coding	118.12	1.03351	0.272931	3.78671	0.000152657	0.0219142
ENSG00000135636	DYSF	protein_coding	4483.52	0.841847	0.222539	3.78292	0.000155002	0.0220214
ENSG00000123405	NFE2	protein_coding	1121.3	0.710701	0.188383	3.77264	0.000161531	0.0227149
ENSG00000123610	TNFAIP6	protein_coding	87.6199	1.05424	0.280016	3.76495	0.000166585	0.023189
ENSG00000135828	RNASEL	protein_coding	308.112	0.79099	0.210316	3.76096	0.000169265	0.0233264
ENSG00000174695	TMEM167A	protein_coding	5242.58	0.419972	0.111803	3.75635	0.000172409	0.0235244
ENSG00000267365	KCNJ2-AS1	antisense	16.0532	0.947223	0.252389	3.75303	0.00017471	0.0236047
ENSG00000198824	CHAMP1	protein_coding	377.53	-0.515964	0.137693	-3.74721	0.000178813	0.0238336
ENSG00000112365	ZBTB24	protein_coding	481.702	-0.470374	0.125576	-3.74574	0.000179863	0.0238336
ENSG00000162377	COA7	protein_coding	231.404	-0.456464	0.122164	-3.73648	0.000186612	0.0244201
ENSG00000171049	FPR2	protein_coding	1760.47	0.899137	0.240743	3.73484	0.000187833	0.0244201
ENSG00000188305	C19orf35	protein_coding	78.4749	0.89889	0.241931	3.71548	0.000202816	0.0261216
ENSG00000135638	EMX1	protein_coding	3.14908	-1.11765	0.301233	-3.71025	0.000207057	NA
ENSG00000126804	ZBTB1	protein_coding	1666.96	-0.461467	0.124379	-3.71016	0.000207128	0.0264299
ENSG00000124469	CEACAM8	protein_coding	2.97583	0.809019	0.218547	3.7018	0.000214077	NA
ENSG00000182670	TTC3	protein_coding	2495.66	-0.390273	0.105433	-3.70161	0.000214239	0.0270127
ENSG00000270681	RP11-372K14.2	antisense	112.346	-0.888256	0.24007	-3.69998	0.000215615	0.0270127
ENSG00000279561	AL845472.1	pseudogene	11.378	0.924909	0.250767	3.68833	0.000225735	0.0278295
ENSG00000107951	MTPAP	protein_coding	461.079	-0.443484	0.120256	-3.68783	0.000226174	0.0278295
ENSG00000151148	UBE3B	protein_coding	898.15	0.280934	0.0764767	3.67345	0.000239296	0.0290055
ENSG00000169583	CLIC3	protein_coding	14.4102	-1.07041	0.291615	-3.67063	0.000241958	0.0290055
ENSG00000167394	ZNF668	protein_coding	126.099	-0.667154	0.181938	-3.66693	0.000245483	0.0290055
ENSG00000115415	STAT1	protein_coding	7558.69	0.858883	0.234234	3.66678	0.000245628	0.0290055
ENSG00000212978	AC016747.3	processed_transcript	42.952	0.798895	0.217913	3.66612	0.000246256	0.0290055
ENSG00000196954	CASP4	protein_coding	3853.74	0.445477	0.121874	3.65524	0.000256944	0.0300081
ENSG00000162775	RBM15	protein_coding	515.127	-0.552247	0.151323	-3.64946	0.000262788	0.0301784
ENSG00000147883	CDKN2B	protein_coding	75.5888	0.789981	0.216672	3.64598	0.000266372	0.0301784
ENSG00000079950	STX7	protein_coding	1993.79	0.61467	0.168592	3.64591	0.000266449	0.0301784
ENSG00000237765	FAM200B	protein_coding	702.183	0.452393	0.124106	3.64522	0.000267163	0.0301784
ENSG00000159871	LYPD5	protein_coding	6.92333	1.05271	0.288959	3.6431	0.000269377	NA
ENSG00000100365	NCF4	protein_coding	2547.57	0.436078	0.119811	3.63972	0.000272939	0.0305568
ENSG00000138207	RBP4	protein_coding	3.61999	1.10362	0.303505	3.63624	0.000276643	NA
ENSG00000129422	MTUS1	protein_coding	18.1317	-0.939951	0.258616	-3.63455	0.000278466	0.0305568
ENSG00000077721	UBE2A	protein_coding	1534.82	0.314547	0.0865722	3.63335	0.000279764	0.0305568
ENSG00000145287	PLAC8	protein_coding	1886.06	0.943609	0.259772	3.63246	0.000280736	0.0305568
ENSG00000136870	ZNF189	protein_coding	114.963	0.582989	0.160529	3.63166	0.000281599	0.0305568
ENSG00000225648	SBDSP1	transcribed_unprocessed_pseudogene	245.789	-0.531741	0.146541	-3.62861	0.000284955	0.0306794
ENSG00000065060	UHRF1BP1	protein_coding	779.794	-0.646015	0.178357	-3.62202	0.000292306	0.0312269
ENSG00000202474	RNA5SP283	rRNA	15.5821	0.837659	0.231594	3.61692	0.000298124	0.0314601
ENSG00000188807	TMEM201	protein_coding	122.394	-0.535542	0.148099	-3.61612	0.000299055	0.0314601
ENSG00000204619	PPP1R11	protein_coding	1410.47	0.497719	0.138611	3.59075	0.000329726	0.034225
ENSG00000252103	RNU6-917P	snRNA	13.4386	0.851061	0.237045	3.59029	0.000330304	0.034225
ENSG00000117228	GBP1	protein_coding	1568.17	1.01699	0.283641	3.58547	0.000336476	0.0346043
ENSG00000171861	RNMTL1	protein_coding	168.509	-0.374806	0.104954	-3.57115	0.000355418	0.0359651
ENSG00000198818	SFT2D1	protein_coding	1002.49	0.389194	0.108996	3.57072	0.000355995	0.0359651
ENSG00000009790	TRAF3IP3	protein_coding	1774.45	0.49659	0.139117	3.56959	0.000357537	0.0359651
ENSG00000186660	ZFP91	protein_coding	1966.54	-0.459642	0.12893	-3.56506	0.00036377	0.0363269
ENSG00000232815	RP11-764K9.2	unprocessed_pseudogene	55.9103	0.897588	0.251912	3.5631	0.000366505	0.0363367
ENSG00000080189	SLC35C2	protein_coding	910.716	0.335914	0.0944322	3.55719	0.000374837	0.0368973
ENSG00000081721	DUSP12	protein_coding	434.915	-0.454744	0.127957	-3.55389	0.00037958	0.0370992
ENSG00000064393	HIPK2	protein_coding	1930.23	-0.567264	0.159819	-3.54942	0.000386079	0.0374687
ENSG00000096006	CRISP3	protein_coding	4.10549	0.849647	0.239759	3.54375	0.000394484	NA
ENSG00000198815	FOXJ3	protein_coding	1330.66	-0.299666	0.0846336	-3.54075	0.000398993	0.0384512
ENSG00000162645	GBP2	protein_coding	5138.96	0.790003	0.223537	3.53411	0.000409158	0.0390248
ENSG00000268471	MIR4453	lincRNA	18.6788	0.728375	0.206154	3.53317	0.000410609	0.0390248
ENSG00000160602	NEK8	protein_coding	110.751	0.489883	0.138813	3.52908	0.000417001	0.0391962
ENSG00000171155	C1GALT1C1	protein_coding	419.333	0.665575	0.188696	3.52724	0.000419917	0.0391962
ENSG00000102547	CAB39L	protein_coding	113.145	0.534726	0.151627	3.52659	0.000420945	0.0391962
ENSG00000101246	ARFRP1	protein_coding	375.106	0.424509	0.120488	3.52325	0.000426294	0.0394279
ENSG00000109929	SC5D	protein_coding	169.925	0.484124	0.137485	3.52128	0.000429474	0.0394572
ENSG00000111252	SH2B3	protein_coding	7699.14	-0.594715	0.169147	-3.51596	0.000438174	0.0396682
ENSG00000101945	SUV39H1	protein_coding	90.5125	-0.543339	0.154661	-3.51309	0.000442922	0.0396682
ENSG00000104142	VPS18	protein_coding	919.541	-0.45003	0.128122	-3.51252	0.000443876	0.0396682
ENSG00000135632	SMYD5	protein_coding	103.428	-0.469794	0.133767	-3.51204	0.000444687	0.0396682
ENSG00000198223	CSF2RA	protein_coding	1829.47	0.475332	0.135378	3.51116	0.000446162	0.0396682
ENSG00000187595	ZNF385C	protein_coding	9.76548	-0.851437	0.242568	-3.51009	0.000447955	NA
ENSG00000198205	ZXDA	protein_coding	81.2346	-0.543103	0.154804	-3.50832	0.00045094	0.0398359
ENSG00000124019	FAM124B	protein_coding	58.7475	-0.632766	0.181014	-3.49567	0.000472881	0.0414045
ENSG00000113368	LMNB1	protein_coding	1799.48	0.693345	0.198426	3.49422	0.000475442	0.0414045
ENSG00000099875	MKNK2	protein_coding	5292.51	-0.485762	0.139095	-3.4923	0.000478887	0.0414045
ENSG00000167110	GOLGA2	protein_coding	790.685	0.272061	0.0779258	3.49128	0.000480714	0.0414045
ENSG00000170027	YWHAG	protein_coding	2349.96	0.479758	0.137705	3.48394	0.000494083	0.0422624
ENSG00000168062	BATF2	protein_coding	70.2814	1.02317	0.293804	3.48247	0.000496808	0.0422624
ENSG00000144843	ADPRH	protein_coding	764.519	0.53174	0.153071	3.47382	0.000513102	0.0433808
ENSG00000182400	TRAPPC6B	protein_coding	253.862	0.588627	0.169572	3.47126	0.000518018	0.0435293
ENSG00000138623	SEMA7A	protein_coding	82.7028	-0.884577	0.25531	-3.46471	0.000530796	0.0443327
ENSG00000198909	MAP3K3	protein_coding	6455.01	-0.305307	0.0881626	-3.463	0.000534186	0.0443471
ENSG00000272023	CTC-350I8.1	lincRNA	1.43643	-1.00341	0.289924	-3.46095	0.000538277	NA
ENSG00000141026	MED9	protein_coding	243.792	-0.453138	0.130966	-3.45995	0.00054027	0.0445836
ENSG00000235750	KIAA0040	protein_coding	1374.73	0.586319	0.169566	3.45777	0.000544664	0.0446786
ENSG00000014914	MTMR11	protein_coding	1413.47	0.380532	0.110125	3.45547	0.000549341	0.0447957
ENSG00000240859	AC093627.10	lincRNA	142.425	0.653414	0.189267	3.45235	0.00055573	0.0448108
ENSG00000107719	PALD1	protein_coding	15.6615	-0.919902	0.266468	-3.4522	0.00055603	0.0448108
ENSG00000231663	RP5-827C21.4	antisense	24.8396	-0.654814	0.189792	-3.45017	0.000560239	0.0448876
ENSG00000167613	LAIR1	protein_coding	2027.56	0.616671	0.178965	3.44577	0.00056943	0.0453602
ENSG00000145358	DDIT4L	protein_coding	5.32881	0.996662	0.289325	3.44478	0.000571518	NA
ENSG00000077684	JADE1	protein_coding	620.958	-0.437634	0.127273	-3.43856	0.00058482	0.0462348
ENSG00000174010	KLHL15	protein_coding	1276.79	-0.520258	0.151417	-3.43593	0.000590526	0.0462348
ENSG00000181004	BBS12	protein_coding	18.6281	0.779872	0.227069	3.43452	0.000593601	0.0462348
ENSG00000271646	RP11-326I11.3	lincRNA	75.0949	0.668356	0.194717	3.43245	0.000598165	0.0462348
ENSG00000105053	VRK3	protein_coding	630.944	0.400748	0.116767	3.43205	0.000599044	0.0462348
ENSG00000134802	SLC43A3	protein_coding	617.432	0.420639	0.122586	3.43137	0.000600539	0.0462348
ENSG00000174579	MSL2	protein_coding	1494.31	-0.456337	0.133199	-3.42597	0.000612602	0.0467213
ENSG00000233030	RP11-196G18.3	antisense	2.7993	1.03593	0.302491	3.42466	0.000615577	NA
ENSG00000127870	RNF6	protein_coding	988.906	-0.420143	0.122723	-3.42351	0.000618183	0.0467213
ENSG00000188483	IER5L	protein_coding	157.596	-0.849942	0.248313	-3.42286	0.000619656	0.0467213
ENSG00000198492	YTHDF2	protein_coding	1530.53	-0.377714	0.110412	-3.42096	0.000624016	0.0467213
ENSG00000128654	MTX2	protein_coding	137.476	0.471061	0.137709	3.42069	0.000624621	0.0467213
ENSG00000273314	RP5-1136G13.2	antisense	27.4248	0.892957	0.261213	3.4185	0.000629663	0.0467213
ENSG00000166860	ZBTB39	protein_coding	282.431	-0.668268	0.195508	-3.4181	0.000630589	0.0467213
ENSG00000259165	DDX18P1	processed_pseudogene	8.52674	-0.960505	0.281096	-3.417	0.000633144	NA
ENSG00000198648	STK39	protein_coding	289.471	0.432591	0.126701	3.41425	0.000639568	0.0467865
ENSG00000066136	NFYC	protein_coding	1173.85	0.300456	0.0880161	3.41365	0.000640988	0.0467865
ENSG00000089234	BRAP	protein_coding	499.894	-0.38645	0.113263	-3.41196	0.000644966	0.0467865
ENSG00000142156	COL6A1	protein_coding	6.92412	1.00328	0.294147	3.41082	0.000647669	NA
ENSG00000174839	DENND6A	protein_coding	1018.28	-0.321735	0.0943281	-3.4108	0.000647715	0.0467865
ENSG00000007038	PRSS21	protein_coding	49.622	-1.01037	0.296309	-3.40985	0.000649993	0.0467865
ENSG00000242324	RP4-576H24.2	unprocessed_pseudogene	42.736	0.67606	0.198312	3.40907	0.00065184	0.0467865
ENSG00000133059	DSTYK	protein_coding	680.335	-0.468551	0.137613	-3.40483	0.000662048	0.0472729
ENSG00000120948	TARDBP	protein_coding	635.4	0.436529	0.128306	3.40225	0.00066834	0.0474763
ENSG00000265018	CTGLF12P	transcribed_unprocessed_pseudogene	3.12009	-0.966332	0.284182	-3.4004	0.00067288	NA
ENSG00000112146	FBXO9	protein_coding	1688.47	0.314547	0.0925741	3.39779	0.00067932	0.0480088
ENSG00000167851	CD300A	protein_coding	2968.11	0.629364	0.185495	3.39289	0.00069159	0.0486246
ENSG00000156735	BAG4	protein_coding	518.844	-0.539398	0.159154	-3.38915	0.000701099	0.0486246
ENSG00000173065	FAM222B	protein_coding	119.645	-0.423559	0.124997	-3.38856	0.000702613	0.0486246
ENSG00000161509	GRIN2C	protein_coding	59.5173	-0.951663	0.280894	-3.38798	0.000704086	0.0486246
ENSG00000246067	RAB30-AS1	lincRNA	41.6332	0.624209	0.184276	3.38736	0.000705676	0.0486246
ENSG00000020181	GPR124	protein_coding	447.046	-0.656608	0.19402	-3.38423	0.000713783	0.0489385
ENSG00000272520	CTD-2044J15.2	lincRNA	54.3415	0.759569	0.224655	3.38105	0.000722094	0.0492633
ENSG00000151490	PTPRO	protein_coding	207.643	0.856669	0.25358	3.37829	0.000729371	0.0495146
ENSG00000270107	CTD-2306M10.1	lincRNA	23.2381	0.886927	0.262965	3.37279	0.000744106	0.0501274
ENSG00000075142	SRI	protein_coding	923.448	0.389021	0.115361	3.37221	0.000745674	0.0501274
ENSG00000214402	LCNL1	protein_coding	2.8643	-1.00983	0.299517	-3.37153	0.000747527	NA
ENSG00000214517	PPME1	protein_coding	177.809	0.385516	0.114376	3.37062	0.000749992	0.050173
ENSG00000139718	SETD1B	protein_coding	1826.95	-0.451298	0.134081	-3.36587	0.000763027	0.0507984
ENSG00000127554	GFER	protein_coding	189.391	-0.382635	0.113838	-3.36121	0.000776021	0.0510729
ENSG00000139163	ETNK1	protein_coding	823.473	0.580524	0.172744	3.3606	0.000777726	0.0510729
ENSG00000092330	TINF2	protein_coding	1830.46	0.324082	0.0964413	3.36041	0.000778268	0.0510729
ENSG00000155330	C16orf87	protein_coding	410.295	-0.586131	0.174617	-3.35666	0.000788906	0.0513256
ENSG00000006712	PAF1	protein_coding	779.952	0.357202	0.106423	3.35643	0.000789567	0.0513256
ENSG00000107362	ABHD17B	protein_coding	354.289	-0.476928	0.142204	-3.35384	0.000796989	0.0514271
ENSG00000214846	RP11-115L11.1	processed_pseudogene	18.1641	0.993353	0.296233	3.35328	0.000798592	0.0514271
ENSG00000198380	GFPT1	protein_coding	513.711	-0.417188	0.124489	-3.35121	0.000804585	0.051572
ENSG00000233461	RP11-295G20.2	antisense	116.122	0.593999	0.177491	3.34664	0.000817962	0.0521868
ENSG00000184988	TMEM106A	protein_coding	290.749	0.665599	0.199473	3.33678	0.000847542	0.0537961
ENSG00000171444	MCC	protein_coding	12.0152	-0.878956	0.263503	-3.33565	0.000850993	0.0537961
ENSG00000167065	DUSP18	protein_coding	137.528	0.488655	0.146597	3.33331	0.000858184	0.0538348
ENSG00000123353	ORMDL2	protein_coding	137.202	0.562941	0.168904	3.33291	0.000859419	0.0538348
ENSG00000100490	CDKL1	protein_coding	15.7357	0.849494	0.255544	3.32426	0.000886535	0.0550924
ENSG00000100647	KIAA0247	protein_coding	4334.37	-0.471447	0.141833	-3.32396	0.000887491	0.0550924
ENSG00000124496	TRERF1	protein_coding	1010.37	-0.396923	0.119529	-3.32074	0.000897799	0.0551256
ENSG00000104872	PIH1D1	protein_coding	855.572	0.367916	0.11082	3.31995	0.00090032	0.0551256
ENSG00000254667	AP000783.1	transcribed_unprocessed_pseudogene	57.7564	-0.637293	0.19201	-3.31906	0.000903219	0.0551256
ENSG00000177485	ZBTB33	protein_coding	870.726	-0.477799	0.143967	-3.31881	0.000904026	0.0551256
ENSG00000162654	GBP4	protein_coding	2155.73	0.862733	0.260486	3.31201	0.000926289	0.0560904
ENSG00000219545	RPA3OS	protein_coding	276.63	0.427821	0.129193	3.3115	0.000927989	0.0560904
ENSG00000100418	DESI1	protein_coding	909.898	0.356083	0.107682	3.3068	0.000943698	0.0564884
ENSG00000103489	XYLT1	protein_coding	1795.02	-0.63522	0.192161	-3.30568	0.000947477	0.0564884
ENSG00000267040	RP11-35G9.3	antisense	63.8765	0.645537	0.195359	3.30437	0.000951891	0.0564884
ENSG00000254685	FPGT	protein_coding	197.304	0.556773	0.168522	3.30386	0.000953632	0.0564884
ENSG00000100883	SRP54	protein_coding	664.444	0.344018	0.104158	3.30285	0.000957075	0.0564884
ENSG00000196741	CXorf24	lincRNA	35.3009	0.52577	0.159216	3.30224	0.000959168	0.0564884
ENSG00000221916	C19orf73	protein_coding	4.37585	0.987577	0.299064	3.30223	0.000959194	NA
ENSG00000107554	DNMBP	protein_coding	507.687	-0.515383	0.15616	-3.30035	0.000965634	0.0566272
ENSG00000274536	MIR223	antisense	783.159	0.540851	0.164254	3.29278	0.000992008	0.0574244
ENSG00000154856	APCDD1	protein_coding	150.147	0.832084	0.252817	3.29125	0.000997448	0.0574244
ENSG00000173011	TADA2B	protein_coding	1739.29	-0.395056	0.120038	-3.29109	0.000998003	0.0574244
ENSG00000171150	SOCS5	protein_coding	428.361	-0.379667	0.115433	-3.28906	0.00100524	0.0574244
ENSG00000166170	BAG5	protein_coding	1283.06	-0.385265	0.117136	-3.28904	0.00100529	0.0574244
ENSG00000150456	N6AMT2	protein_coding	27.7285	0.616493	0.187577	3.28661	0.00101402	0.0574244
ENSG00000187741	FANCA	protein_coding	125.032	0.461218	0.140466	3.28349	0.00102532	0.0574244
ENSG00000125347	IRF1	protein_coding	5431.9	0.622258	0.189676	3.28064	0.00103573	0.0574244
ENSG00000139793	MBNL2	protein_coding	657.684	-0.589422	0.179674	-3.28051	0.0010362	0.0574244
ENSG00000063587	ZNF275	protein_coding	227.284	-0.423811	0.129263	-3.27868	0.00104293	0.0574244
ENSG00000152409	JMY	protein_coding	462.499	-0.495003	0.15098	-3.27859	0.00104327	0.0574244
ENSG00000166716	ZNF592	protein_coding	2523.5	-0.28394	0.0866101	-3.27836	0.00104411	0.0574244
ENSG00000064999	ANKS1A	protein_coding	624.211	-0.417139	0.127243	-3.27828	0.0010444	0.0574244
[truncated: 2,472 more rows]
