# Supplementary material for: Characterization of Long Non-Coding RNAs in Systemic Sclerosis Monocytes: A Potential Role for PSMB8-AS1 in Altered Cytokine Secretion
Source: Int J Mol Sci. 2021 Apr 22;22(9):4365. doi: 10.3390/ijms22094365 (PMC8122435; doi:10.3390/ijms22094365)
Supplement: Supplementary file 1 [file ijms-22-04365-s001.zip › SupplementaryTable_2.xlsx]

## Sheet: geneInfo
	geneSymbol	EntrezID	moduleColor	MM.brown4	p.MM.brown4	MM.honeydew1	p.MM.honeydew1	MM.darkturquoise	p.MM.darkturquoise	MM.yellowgreen	p.MM.yellowgreen	MM.palevioletred3	p.MM.palevioletred3	MM.salmon	p.MM.salmon	MM.darkgreen	p.MM.darkgreen	MM.white	p.MM.white	MM.lightgreen	p.MM.lightgreen	MM.darkorange2	p.MM.darkorange2	MM.grey	p.MM.grey	MM.darkseagreen4	p.MM.darkseagreen4	MM.orangered4	p.MM.orangered4	MM.darkslateblue	p.MM.darkslateblue	MM.bisque4	p.MM.bisque4	MM.violet	p.MM.violet	MM.blue	p.MM.blue	MM.saddlebrown	p.MM.saddlebrown
ENSG00000107833	NPM3	10360	bisque4	0.409601	0.016144	0.686959	7.22777e-06	0.639595	4.65164e-05	0.409144	0.0162749	0.230455	0.189777	-0.359837	0.0365905	0.094468	0.595124	-0.386447	0.0239718	0.197927	0.261828	-0.162536	0.358399	0.298904	0.0859412	0.142764	0.420559	0.527708	0.00133971	0.128296	0.469618	-0.498239	0.00271054	0.0316324	0.859043	0.353714	0.0401485	-0.400926	0.0187796
ENSG00000179295	PTPN11	5781	bisque4	0.536324	0.00107705	0.264699	0.130319	0.404969	0.0175098	0.43755	0.00965818	0.407263	0.016822	-0.263448	0.132214	-0.00680337	0.969539	-0.384541	0.0247361	0.0684276	0.700589	0.204375	0.246287	0.0971968	0.584483	0.171333	0.332616	0.306103	0.0782979	-0.379187	0.0269908	-0.447431	0.00797248	0.0853079	0.631443	0.47391	0.00463614	0.0297217	0.86748
ENSG00000165923	AGBL2	79841	bisque4	-0.214384	0.223405	-0.223022	0.20486	-0.112318	0.527107	-0.379381	0.0269061	-0.232548	0.185674	-0.0840436	0.636526	0.0533074	0.76462	0.472195	0.00480797	-0.198862	0.259536	-0.185121	0.294569	-0.0450177	0.800418	-0.023213	0.896323	-0.347059	0.0443271	0.272968	0.118298	0.357233	0.0380709	-0.307839	0.0765366	-0.430875	0.0109607	0.0601533	0.73541
ENSG00000203879	GDI1	2664	bisque4	-0.477692	0.00427575	-0.310475	0.0739206	-0.551085	0.000730956	-0.0632191	0.722444	-0.129991	0.463717	0.0700684	0.693752	-0.311282	0.073133	-0.0379283	0.831356	0.284326	0.103162	0.10052	0.57164	-0.311318	0.0730987	0.0733952	0.679963	-0.247232	0.158637	0.246456	0.159991	0.525288	0.00142296	0.372326	0.0301245	-0.294449	0.0909504	-0.141949	0.423243
ENSG00000145868	FBXO38	81545	bisque4	-0.340208	0.0489867	-0.481984	0.00389632	-0.527271	0.00135444	-0.503232	0.00241598	-0.220356	0.210465	0.178791	0.311679	-0.117405	0.508439	0.701486	3.80447e-06	-0.348772	0.0432196	0.128564	0.468682	-0.384416	0.0247868	-0.194201	0.271097	-0.76018	1.83329e-07	0.0337083	0.849895	0.69161	5.90886e-06	-0.279059	0.109987	-0.621762	8.6691e-05	0.580902	0.000315542
ENSG00000155660	PDIA4	9601	bisque4	0.245213	0.162176	0.375124	0.0288125	0.511144	0.00200621	0.199469	0.258055	0.0849379	0.632929	-0.0459347	0.796437	0.23385	0.183153	-0.342102	0.0476612	0.216225	0.219359	-0.260389	0.136931	0.357931	0.0376695	0.324661	0.0610158	0.606684	0.000142551	-0.031969	0.857559	-0.56462	0.000504136	0.0289413	0.87093	0.376795	0.0280515	-0.347302	0.0441689
ENSG00000211460	TSN	7247	bisque4	0.540373	0.000970111	0.469225	0.00511862	0.669628	1.48439e-05	0.302055	0.0825281	0.321419	0.0637953	-0.221274	0.208522	0.211232	0.23045	-0.434362	0.0102629	0.0338247	0.849382	-0.158245	0.371398	0.410149	0.0159887	0.169852	0.336877	0.544637	0.000867718	0.0428141	0.810005	-0.648888	3.31012e-05	-0.0258783	0.884494	0.58887	0.000248606	-0.368963	0.0317659
ENSG00000196187	TMEM63A	9725	bisque4	-0.244616	0.163233	-0.497566	0.00275253	-0.338173	0.050444	-0.336515	0.0516565	-0.272701	0.118672	0.156402	0.377065	-0.160785	0.363671	0.641256	4.38079e-05	-0.00449363	0.979878	-0.0210698	0.90585	-0.424618	0.0123134	-0.144351	0.415359	-0.552828	0.000697428	0.0606936	0.73312	0.674202	1.23328e-05	-0.235416	0.180153	-0.810842	6.10806e-09	0.374031	0.0293194
ENSG00000183250	LINC01547	84536	bisque4	-0.221415	0.208225	-0.473949	0.00463232	-0.300526	0.0841708	-0.220888	0.209337	-0.245602	0.161489	0.0436204	0.806494	-0.162405	0.358793	0.3784	0.027336	0.121858	0.492375	-0.0463972	0.794431	-0.327994	0.0582587	-0.00255035	0.988579	-0.383906	0.024995	0.0799761	0.652988	0.556932	0.00062378	-0.101583	0.567559	-0.617341	0.000100566	0.0950555	0.592826
ENSG00000204348	DXO	1797	bisque4	-0.272378	0.119127	-0.339786	0.049286	-0.382469	0.0255893	-0.324327	0.0612981	-0.0957866	0.589972	0.125179	0.480567	-0.201867	0.252258	0.418936	0.0136612	-0.109672	0.536947	0.05996	0.73623	-0.326136	0.0597833	-0.0854334	0.63094	-0.515551	0.00180539	0.242533	0.16696	0.60257	0.000162567	-0.0596999	0.737334	-0.476594	0.00437781	0.226464	0.197774
ENSG00000182606	TRAK1	22906	bisque4	0.323589	0.0619244	0.136703	0.440751	0.32139	0.0638207	0.481963	0.0038981	0.183968	0.297641	-0.115446	0.515589	-0.059654	0.737529	-0.329037	0.0574166	0.332722	0.0545176	0.105556	0.552424	-0.00174901	0.992167	0.100229	0.572758	0.412359	0.0153741	-0.435526	0.0100384	-0.332503	0.0546865	0.178861	0.311484	0.173716	0.325833	-0.0347476	0.845321
ENSG00000137054	POLR1E	64425	bisque4	0.373739	0.0294557	0.320203	0.0648638	0.541631	0.000938839	0.289178	0.0971628	0.118467	0.504586	-0.240714	0.170265	0.246286	0.160288	-0.303987	0.0804878	0.046439	0.79425	-0.151522	0.392316	0.402691	0.0182163	0.0637518	0.720198	0.518569	0.00167825	-0.132862	0.453818	-0.634526	5.57416e-05	-0.103396	0.560629	0.442415	0.00879388	-0.291884	0.0939344
ENSG00000184575	XPOT	11260	bisque4	0.396207	0.0203575	0.272065	0.119569	0.390775	0.0223086	0.131151	0.459704	0.360722	0.0360978	-0.27218	0.119406	0.122569	0.489835	-0.181422	0.304492	-0.290944	0.0950465	0.0988885	0.577928	0.258197	0.140388	0.192445	0.275538	0.15975	0.366809	-0.101932	0.566221	-0.406621	0.0170121	-0.118844	0.503221	0.527219	0.00135618	0.0463831	0.794492
ENSG00000196655	TRAPPC4	51399	bisque4	-0.435531	0.0100375	-0.118421	0.50475	0.031648	0.858974	-0.349839	0.0425409	-0.508471	0.00213726	0.331261	0.0556525	0.595413	0.000203442	-0.0644649	0.717196	-0.00690144	0.9691	-0.59873	0.000183479	0.64144	4.35182e-05	0.34983	0.0425467	0.53588	0.00108939	0.10743	0.54535	-0.553926	0.000677006	-0.157744	0.372934	0.293428	0.0921292	-0.591972	0.000226186
ENSG00000100201	DDX17	10521	bisque4	-0.384994	0.0245524	-0.345065	0.0456451	-0.473501	0.00467669	-0.512366	0.00194864	-0.280335	0.108303	0.119086	0.502344	-0.0596936	0.737361	0.649149	3.27817e-05	-0.281819	0.10637	-0.000185325	0.99917	-0.272698	0.118676	-0.15771	0.373038	-0.655053	2.62463e-05	0.135465	0.444942	0.62374	8.10592e-05	-0.283472	0.104246	-0.610279	0.000126903	0.368471	0.0320117
ENSG00000115053	NCL	4691	bisque4	0.366846	0.0328356	0.28466	0.10274	0.185223	0.294298	0.502332	0.00246691	0.430367	0.0110655	-0.211457	0.229942	-0.130061	0.463476	-0.512696	0.00193337	0.0833967	0.639133	0.362193	0.0352911	-0.00122698	0.994505	0.07936	0.655496	0.262401	0.133814	-0.338578	0.050151	-0.359543	0.0367549	0.311315	0.0731016	0.566908	0.000472706	0.02781	0.875936
ENSG00000196367	TRRAP	8295	bisque4	0.491732	0.00314087	0.0936587	0.598296	0.222987	0.204932	0.542239	0.000924058	0.399526	0.0192367	-0.269352	0.123448	-0.384767	0.0246445	-0.10649	0.548894	0.265204	0.129559	0.416364	0.0143108	-0.460837	0.00609078	-0.229708	0.191256	-0.0937708	0.597856	-0.411964	0.0154825	0.153607	0.385759	0.144	0.416507	-0.169473	0.33797	0.415332	0.0145788
ENSG00000135678	CPM	1368	bisque4	0.287947	0.0986593	0.346399	0.0447597	0.372162	0.0302027	0.285524	0.101655	0.206832	0.24053	-0.32788	0.0583513	0.082908	0.641105	-0.373215	0.0297022	-0.0232616	0.896106	0.0189155	0.91544	0.326078	0.0598318	0.430087	0.0111237	0.390464	0.0224249	-0.109158	0.538867	-0.454339	0.00694888	0.0181176	0.918995	0.5122	0.00195637	-0.2107	0.231653
ENSG00000100360	IFT27	11020	bisque4	-0.422887	0.0127116	-0.260871	0.13618	-0.204685	0.245555	-0.394446	0.0209737	-0.510183	0.00205249	0.16358	0.355279	0.167092	0.344902	0.330449	0.0562913	0.0199881	0.910664	-0.37721	0.0278648	0.132171	0.456191	0.23881	0.173773	-0.0498788	0.779373	0.240556	0.170553	0.181619	0.303958	-0.220529	0.210098	-0.365873	0.0333374	-0.178499	0.312481
ENSG00000053254	FOXN3	1112	bisque4	0.403357	0.0180072	0.283907	0.103693	0.25654	0.143041	0.599037	0.000181722	0.450216	0.00754528	-0.207592	0.238769	-0.202029	0.251868	-0.565754	0.00048834	0.285422	0.101783	0.32481	0.0608903	-0.0649623	0.715104	0.112294	0.527195	0.340229	0.0489722	-0.33506	0.0527393	-0.321108	0.0640674	0.385686	0.0242747	0.44862	0.00778766	-0.0625089	0.725441
ENSG00000168556	ING2	3622	bisque4	0.278197	0.111136	0.512955	0.00192146	0.386007	0.0241463	0.268423	0.124797	0.34204	0.0477039	-0.117444	0.508296	0.0973514	0.583882	-0.48644	0.00353344	-0.0123801	0.944599	-0.00084338	0.996223	0.302704	0.0818381	-0.104843	0.555124	0.403359	0.0180066	0.0773764	0.663595	-0.490048	0.00326154	0.181445	0.304429	0.603008	0.000160324	-0.288987	0.097394
ENSG00000066651	TRMT11	60487	bisque4	-0.434285	0.0102778	-0.35012	0.0423639	-0.418616	0.0137406	-0.605547	0.000147849	-0.366241	0.0331472	0.290487	0.0955908	0.0734202	0.67986	0.688832	6.66757e-06	-0.318886	0.0660361	-0.137221	0.439006	-0.156872	0.375615	-0.15021	0.396475	-0.557269	0.000618053	0.126425	0.476174	0.506485	0.0022394	-0.346234	0.0448687	-0.586397	0.000267878	0.344859	0.0457831
ENSG00000138614	VWA9	81556	bisque4	-0.216868	0.217958	-0.366557	0.0329844	-0.519847	0.00162679	-0.256656	0.142854	-0.0654434	0.713083	0.025292	0.887094	-0.271188	0.120812	0.398427	0.019602	-0.203836	0.247562	0.249936	0.153985	-0.415367	0.0145697	-0.12471	0.482225	-0.68124	9.21401e-06	0.032587	0.854834	0.666868	1.65751e-05	-0.0579304	0.744857	-0.448896	0.0077453	0.374527	0.0290881
ENSG00000167642	SPINT2	10653	bisque4	0.120072	0.498786	0.463689	0.00574385	0.466292	0.00544214	0.0887474	0.6177	-0.0551565	0.756697	-0.0731971	0.680781	0.412141	0.015434	-0.391338	0.0220996	0.03683	0.836173	-0.373431	0.0296005	0.629041	6.75526e-05	0.141003	0.426374	0.682248	8.83154e-06	0.104876	0.555	-0.754675	2.52365e-07	-0.0321171	0.856906	0.575321	0.000371546	-0.542624	0.000914806
ENSG00000267858	MZF1-AS1	100131691	bisque4	-0.118176	0.505641	-0.301542	0.0830759	-0.149022	0.400263	-0.192984	0.274169	-0.243141	0.165867	-0.104173	0.55767	-0.0964316	0.587458	0.501506	0.00251446	-0.07835	0.659615	-0.0219009	0.902154	-0.261007	0.135968	0.179832	0.308822	-0.420042	0.0133896	0.150628	0.395149	0.473275	0.00469915	-0.300692	0.0839909	-0.582511	0.000300861	0.283708	0.103946
ENSG00000105176	URI1	8725	bisque4	0.227051	0.196585	0.422551	0.0127901	0.285774	0.101343	0.0773068	0.66388	0.269757	0.122864	-0.0964843	0.587253	0.267902	0.125559	-0.306819	0.0775674	-0.321832	0.0634364	0.0413521	0.816381	0.418917	0.0136659	0.0526935	0.767256	0.304558	0.0798922	-0.206742	0.240739	-0.609439	0.000130413	-0.0241431	0.892192	0.73487	7.4659e-07	-0.0481159	0.786988
ENSG00000103496	STX4	6810	bisque4	-0.304109	0.0803603	-0.301049	0.0836065	-0.584432	0.000284129	0.0815788	0.646482	0.13269	0.454407	0.0207876	0.907106	-0.531687	0.00121215	-0.0225125	0.899435	0.239765	0.172008	0.403492	0.0179653	-0.602008	0.000165487	-0.215218	0.221566	-0.479074	0.00415019	0.0693984	0.696541	0.71266	2.26222e-06	0.460457	0.00613831	-0.336031	0.0520146	0.178476	0.312545
ENSG00000213373	LINC00671	NA	bisque4	-0.240032	0.171515	-0.290627	0.095424	-0.348914	0.0431286	-0.299123	0.0857007	-0.0563631	0.75154	-0.0346265	0.845854	-0.259859	0.13776	0.402283	0.018345	-0.0913389	0.607428	0.0700799	0.693704	-0.359487	0.0367865	-0.0539911	0.761688	-0.57709	0.000352902	0.245144	0.162298	0.690983	6.07297e-06	-0.0642168	0.71824	-0.529017	0.00129652	0.204498	0.245998
ENSG00000198162	MAN1A2	10905	bisque4	0.446332	0.00814657	0.37353	0.0295542	0.318996	0.0659376	0.324192	0.0614117	0.408232	0.0165381	-0.291609	0.0942584	0.0169244	0.924314	-0.303655	0.080835	-0.159591	0.367293	0.250729	0.15264	0.114281	0.519862	0.039992	0.822322	0.14705	0.406597	-0.2659	0.128519	-0.371882	0.030337	0.0394515	0.824686	0.510925	0.00201667	0.134516	0.448167
ENSG00000197958	RPL12	6136	bisque4	0.156318	0.377327	0.386848	0.0238136	0.239024	0.173377	0.268537	0.124631	0.210485	0.232139	-0.0429877	0.809249	0.154052	0.384366	-0.613583	0.000113895	-0.00256833	0.988498	6.54761e-05	0.999707	0.419587	0.0135006	0.143908	0.416807	0.528161	0.00132461	-0.0305353	0.863886	-0.623664	8.12699e-05	0.262025	0.134393	0.77728	6.42118e-08	-0.37947	0.0268674
ENSG00000130332	LSM7	51690	bisque4	0.231619	0.187487	0.464139	0.00569073	0.475401	0.00449104	0.339164	0.0497299	0.222657	0.205621	-0.150626	0.395155	0.125932	0.477908	-0.646741	3.58451e-05	0.274616	0.116005	-0.202575	0.250563	0.424703	0.012294	0.140544	0.427895	0.69368	5.39571e-06	0.195008	0.269072	-0.600768	0.000172098	0.260221	0.137194	0.634149	5.64898e-05	-0.665634	1.74063e-05
ENSG00000272666	CTA-384D8.35	NA	bisque4	-0.219439	0.212419	-0.382021	0.0257769	-0.378602	0.0272472	-0.332316	0.0548309	-0.139705	0.430685	0.371769	0.0303914	-0.144064	0.416297	0.404495	0.0176549	-0.0995037	0.575553	0.0789398	0.657208	-0.37365	0.0294978	-0.166742	0.345928	-0.478587	0.00419409	0.00503353	0.977461	0.545224	0.000854402	-0.0612383	0.730813	-0.478208	0.00422847	0.326144	0.0597765
ENSG00000166598	HSP90B1	7184	bisque4	0.286702	0.10019	0.221248	0.208577	0.178294	0.313046	0.208295	0.237148	0.354008	0.0399715	-0.00570505	0.974455	0.0408355	0.818637	-0.291096	0.094866	-0.124948	0.481384	0.226786	0.197122	0.0945123	0.59495	0.150751	0.394758	0.186051	0.292108	-0.212088	0.228522	-0.37052	0.0309969	0.123353	0.487042	0.535757	0.00109283	0.137097	0.439423
ENSG00000175309	PHYKPL	85007	bisque4	-0.249961	0.153944	-0.466501	0.00541858	-0.379489	0.0268592	-0.332676	0.0545529	-0.197951	0.26177	0.135048	0.446358	-0.182572	0.301385	0.499627	0.00262565	-0.0485667	0.785039	0.00997652	0.955343	-0.356138	0.0387079	-0.160139	0.365629	-0.522603	0.00152057	0.101315	0.568584	0.632893	5.90467e-05	-0.147577	0.404901	-0.62106	8.87705e-05	0.266994	0.126895
ENSG00000108561	C1QBP	708	bisque4	0.247814	0.157628	0.363653	0.0345052	0.559412	0.000582696	0.20183	0.252346	0.0808414	0.649472	-0.131001	0.460221	0.338268	0.050375	-0.473964	0.00463081	0.085233	0.631744	-0.30331	0.0811981	0.5765	0.000359025	0.209143	0.2352	0.720361	1.55858e-06	-0.00529033	0.976311	-0.758265	2.05081e-07	0.0102791	0.953991	0.648227	3.39253e-05	-0.533601	0.00115468
ENSG00000106723	SPIN1	10927	bisque4	0.349708	0.0426237	0.538766	0.00101138	0.319418	0.0655601	0.294217	0.0912178	0.368927	0.0317837	-0.224149	0.20252	0.0679252	0.702687	-0.417533	0.0140125	-0.0586665	0.741725	0.107901	0.543578	0.225683	0.199367	-0.0157406	0.929595	0.269168	0.123715	-0.0324312	0.855521	-0.447512	0.00795985	0.120571	0.496992	0.562945	0.000528323	-0.13961	0.431001
ENSG00000137815	RTF1	23168	bisque4	0.384289	0.0248384	0.313246	0.0712452	0.470315	0.00500264	0.155164	0.3809	0.172876	0.328217	-0.0678592	0.702963	0.217894	0.215737	-0.173359	0.326846	-0.0514617	0.772552	-0.0943251	0.595683	0.288275	0.0982585	-0.0326722	0.854458	0.353165	0.0404805	-0.0680474	0.702177	-0.490741	0.0032114	-0.156163	0.377805	0.361243	0.0358103	-0.110212	0.534931
ENSG00000179104	TMTC2	160335	bisque4	0.0845297	0.63457	-0.321111	0.0640647	-0.251586	0.151196	-0.0477959	0.788372	0.0731235	0.681086	-0.181192	0.305117	-0.325391	0.0604035	0.3866	0.0239113	-0.125283	0.480197	0.30439	0.080067	-0.451083	0.0074164	-0.00475989	0.978686	-0.593195	0.000217858	-0.150282	0.396246	0.593204	0.000217795	-0.1441	0.416178	-0.451449	0.00736263	0.436539	0.00984655
ENSG00000196873	CBWD3	55871	bisque4	-0.351988	0.0412006	-0.376252	0.0282968	-0.42924	0.0113014	-0.534621	0.00112503	-0.255107	0.145367	0.205587	0.243437	-0.045452	0.798532	0.691907	5.83255e-06	-0.324629	0.0610432	0.0180221	0.919421	-0.316377	0.0683156	-0.214514	0.223119	-0.671909	1.35387e-05	0.108154	0.54263	0.633611	5.75718e-05	-0.304849	0.0795894	-0.632488	5.98929e-05	0.482064	0.00388952
ENSG00000161217	PCYT1A	5130	bisque4	-0.340692	0.0486453	-0.391322	0.0221053	-0.264332	0.130872	-0.279267	0.109711	-0.401528	0.0185857	0.0316829	0.85882	-0.0262139	0.883006	0.403163	0.0180677	0.0898574	0.613292	-0.186803	0.290127	-0.191145	0.278858	-0.0386376	0.828249	-0.29194	0.0938679	0.191885	0.276964	0.451109	0.00741263	-0.188487	0.285723	-0.588617	0.000250516	0.0492018	0.782295
ENSG00000196782	MAML3	55534	bisque4	0.420801	0.0132057	0.132026	0.456689	0.202553	0.250616	0.646331	3.63917e-05	0.43156	0.0108205	-0.412752	0.0152668	-0.326795	0.0592394	-0.471368	0.00489287	0.327519	0.0586458	0.401177	0.0186984	-0.180872	0.305985	0.241282	0.169229	0.204153	0.246812	-0.469036	0.00513894	-0.149974	0.397226	0.325155	0.060601	0.282867	0.10502	0.0189038	0.915492
ENSG00000253352	TUG1	NA	bisque4	-0.122059	0.491656	-0.460688	0.00610946	-0.556392	0.00063306	-0.184239	0.296916	0.0731055	0.68116	0.0400607	0.822022	-0.411164	0.0157038	0.482258	0.00387311	-0.224696	0.201392	0.461839	0.00596689	-0.650331	3.13659e-05	-0.252073	0.150379	-0.845294	3.18543e-10	-0.15317	0.387125	0.813916	4.81185e-09	-0.0365124	0.837567	-0.554183	0.000672306	0.676878	1.10486e-05
ENSG00000172732	MUS81	80198	bisque4	-0.315716	0.068926	-0.292987	0.0926424	-0.260302	0.137067	-0.401614	0.0185583	-0.226109	0.198497	0.13652	0.44137	-0.0789047	0.657352	0.522051	0.00154132	-0.0145087	0.935093	-0.158342	0.371102	-0.256537	0.143047	-0.232089	0.186568	-0.435526	0.0100384	0.301045	0.0836103	0.568222	0.000455453	-0.173657	0.326002	-0.637989	4.92786e-05	0.116354	0.51227
ENSG00000267169	CTB-55O6.12	100507373	bisque4	-0.279375	0.109568	-0.485382	0.00361685	-0.205231	0.24427	-0.456562	0.00664437	-0.479095	0.00414835	0.101901	0.566338	0.135032	0.446412	0.651037	3.05468e-05	-0.146902	0.407075	-0.255859	0.144142	-0.046752	0.792893	0.0887453	0.617708	-0.330862	0.0559656	0.0281615	0.87438	0.332039	0.0550456	-0.472475	0.00477958	-0.619167	9.46096e-05	0.201324	0.253562
ENSG00000172830	SSH3	54961	bisque4	-0.204376	0.246284	-0.317949	0.06688	-0.119049	0.502477	-0.131002	0.460219	-0.264472	0.130661	0.140286	0.428752	-0.117483	0.508157	0.26149	0.135219	0.336104	0.0519606	-0.215791	0.220309	-0.239772	0.171994	0.10825	0.542269	-0.101494	0.567897	0.166838	0.345646	0.396001	0.0204287	-0.0065412	0.970712	-0.594686	0.000208073	-0.112573	0.526163
ENSG00000084090	STARD7	56910	bisque4	0.397602	0.01988	0.307945	0.0764294	0.62685	7.28669e-05	0.305899	0.0785071	0.0925051	0.60283	-0.156921	0.375466	0.257325	0.141779	-0.383378	0.025212	0.220955	0.209196	-0.276082	0.113992	0.403547	0.017948	0.14038	0.42844	0.657397	2.39966e-05	-0.0871207	0.624184	-0.66134	2.0603e-05	-0.0416577	0.815047	0.421333	0.0130783	-0.425169	0.0121888
ENSG00000100991	TRPC4AP	26133	bisque4	-0.401347	0.0186439	-0.30545	0.0789682	-0.382702	0.0254922	-0.156238	0.377573	-0.198403	0.26066	0.089019	0.61662	-0.224167	0.202482	0.137254	0.438895	0.229152	0.192363	-0.044953	0.8007	-0.267369	0.126343	0.0582299	0.743582	-0.237438	0.176333	0.251868	0.150723	0.522763	0.00151459	0.167153	0.344722	-0.430567	0.0110242	-0.102207	0.565167
ENSG00000105967	TFEC	22797	bisque4	-0.120901	0.495804	-0.266348	0.127852	-0.319705	0.0653049	-0.480496	0.0040244	-0.0626234	0.724957	0.181716	0.303697	-0.110659	0.533266	0.751906	2.95458e-07	-0.397608	0.0198778	0.118083	0.505976	-0.415747	0.0144705	-0.368647	0.0319235	-0.779085	5.71738e-08	0.0431877	0.808378	0.675241	1.18191e-05	-0.358067	0.0375916	-0.63967	4.63909e-05	0.639898	4.60124e-05
ENSG00000056097	ZFR	51663	bisque4	0.317332	0.0674401	0.353156	0.0404863	0.229616	0.191438	0.0964893	0.587234	0.326895	0.0591569	-0.144562	0.41467	0.119355	0.501374	-0.142272	0.422178	-0.385485	0.0243549	0.180897	0.305918	0.199997	0.25677	-0.165523	0.349514	0.0527853	0.766861	-0.179703	0.309175	-0.353049	0.0405512	-0.0846067	0.63426	0.49343	0.00302324	0.153507	0.386071
ENSG00000142082	SIRT3	23410	bisque4	-0.287085	0.0997177	-0.130096	0.463354	-0.195299	0.268345	-0.0686166	0.699801	-0.280391	0.10823	-0.247328	0.158471	-0.185539	0.293462	0.156319	0.377323	0.118469	0.504578	-0.0977538	0.582321	-0.148169	0.402998	-0.00928061	0.958456	-0.228302	0.194062	0.432043	0.0107226	0.453094	0.00712464	-0.0290626	0.870394	-0.422877	0.0127138	-0.163485	0.355563
ENSG00000272825	LL21NC02-1C16.2	NA	bisque4	-0.203244	0.248968	-0.367893	0.0323031	-0.238306	0.17471	-0.394943	0.0207985	-0.254094	0.147026	0.0859352	0.628928	-0.00756912	0.966112	0.493721	0.00300348	-0.125112	0.480801	-0.117436	0.508326	-0.186951	0.289738	-0.128756	0.468014	-0.414074	0.0149109	-0.00833715	0.962676	0.454853	0.00687741	-0.293274	0.0923083	-0.529507	0.00128064	0.185578	0.293358
ENSG00000272821	CTA-384D8.36	NA	bisque4	-0.194836	0.269504	-0.381592	0.0259581	-0.405096	0.0174711	-0.216666	0.218399	-0.0714624	0.687962	0.147725	0.404423	-0.342955	0.0470737	0.501525	0.00251336	-0.0235524	0.894815	0.190294	0.281044	-0.572686	0.000400934	-0.269026	0.12392	-0.660204	2.1533e-05	0.157422	0.373923	0.786347	3.54478e-08	-0.0506159	0.776194	-0.712067	2.32682e-06	0.454072	0.00698629
ENSG00000130338	TULP4	56995	bisque4	0.50271	0.00244538	0.0905355	0.610605	0.0952391	0.592108	0.656025	2.5291e-05	0.643487	4.03945e-05	-0.358221	0.0375033	-0.57111	0.000419482	-0.350335	0.0422283	0.292371	0.093362	0.619655	9.30726e-05	-0.522722	0.0015161	0.00568588	0.974541	-0.128307	0.469577	-0.406881	0.0169349	0.203692	0.247903	0.397032	0.0200739	0.0813938	0.647232	0.274531	0.116122
ENSG00000127419	TMEM175	84286	bisque4	-0.390388	0.0224533	-0.247084	0.158895	-0.227888	0.194894	-0.0405311	0.819966	-0.331969	0.0551007	0.0956626	0.590455	-0.14621	0.409314	0.000391379	0.998247	0.49123	0.00317643	-0.245293	0.162035	-0.136941	0.43995	0.0669726	0.706671	0.0472878	0.790572	0.361039	0.0359231	0.346876	0.0444468	0.2063	0.241769	-0.460796	0.00609592	-0.397344	0.0199677
ENSG00000096384	HSP90AB1	3326	bisque4	0.304917	0.0795197	0.524325	0.00145732	0.395864	0.0204763	0.530192	0.00125877	0.367604	0.0324492	-0.288347	0.0981714	-0.0718991	0.686152	-0.56987	0.000434598	0.300476	0.0842245	0.0742855	0.67629	0.119626	0.500394	0.127314	0.473051	0.472531	0.00477387	-0.00585085	0.973802	-0.398715	0.0195058	0.342842	0.0471511	0.456151	0.00669987	-0.338326	0.050333
ENSG00000089041	P2RX7	5027	bisque4	-0.115183	0.516553	-0.227161	0.196362	-0.106969	0.547086	-0.27282	0.118506	-0.148149	0.40306	0.0290399	0.870494	-0.0910027	0.608757	0.513901	0.00187842	-0.0900697	0.61245	-0.0473927	0.790118	-0.286101	0.100935	-0.0444787	0.802761	-0.417661	0.0139802	0.100812	0.570515	0.48828	0.00339243	-0.261874	0.134625	-0.582322	0.000302553	0.288068	0.0985112
ENSG00000204618	RNF39	80352	bisque4	-0.140694	0.427398	-0.124005	0.484723	-0.440175	0.00918338	0.0501108	0.778372	0.209661	0.234015	-0.240542	0.170579	-0.480944	0.00398546	-0.0178799	0.920055	0.0155719	0.930347	0.405993	0.0171999	-0.439613	0.0092833	0.049242	0.782121	-0.511173	0.00200482	0.169398	0.338189	0.628862	6.79723e-05	0.295078	0.0902298	-0.176921	0.316848	0.153455	0.386232
ENSG00000174749	C4orf32	132720	bisque4	-0.431702	0.0107917	-0.507486	0.00218743	-0.43577	0.00999188	-0.504794	0.00232976	-0.430321	0.0110751	0.613234	0.00011521	0.468596	0.00518662	0.211289	0.23032	-0.468603	0.00518578	-0.0831152	0.640269	0.325536	0.0602824	0.217406	0.216792	0.00679776	0.969564	-0.35472	0.0395455	-0.317547	0.067245	-0.210082	0.233055	0.270871	0.121265	0.243433	0.165343
ENSG00000125450	NUP85	79902	bisque4	-0.253072	0.148715	-0.1876	0.288037	-0.0505768	0.776363	-0.524423	0.00145378	-0.357669	0.0378199	0.038297	0.829741	0.121114	0.495041	0.652186	2.92563e-05	-0.155692	0.379263	-0.372868	0.0298666	-0.0477949	0.788377	-0.126469	0.476018	-0.372669	0.0299609	0.41834	0.0138095	0.434604	0.0102158	-0.460387	0.00614714	-0.649959	3.18057e-05	0.0557426	0.754191
ENSG00000268350	FAM156A	29057	bisque4	-0.0700886	0.693668	-0.163694	0.35494	-0.305564	0.0788514	0.0901322	0.612202	0.0916747	0.606103	-0.220239	0.210714	-0.486405	0.00353619	0.134007	0.449902	0.14291	0.420078	0.291891	0.0939263	-0.510374	0.00204322	-0.0727332	0.682699	-0.49724	0.00277304	0.0817713	0.645702	0.714255	2.09626e-06	0.148763	0.401092	-0.486922	0.00349601	0.1858	0.29277
ENSG00000276171	AC114498.1	NA	bisque4	0.00237269	0.989374	0.274479	0.116194	0.12208	0.49158	0.130195	0.463011	0.0100125	0.955182	0.122749	0.489192	0.245206	0.162189	-0.351212	0.0416803	0.0626795	0.72472	-0.0840792	0.636383	0.331629	0.0553654	-0.00922636	0.958698	0.459462	0.00626438	-0.12232	0.490725	-0.531677	0.00121246	0.140614	0.427664	0.467919	0.00526054	-0.277793	0.111677
ENSG00000181885	CLDN7	1366	bisque4	-0.263633	0.131932	-0.320387	0.0647007	-0.20346	0.248454	-0.279576	0.109302	-0.174838	0.32267	0.134418	0.448499	-0.0729394	0.681847	0.438103	0.00955642	0.0414946	0.815759	-0.1071	0.546591	-0.250533	0.152972	-0.188997	0.284397	-0.321937	0.0633452	0.0883013	0.619475	0.439685	0.00927046	-0.100241	0.572714	-0.573824	0.000387999	0.182987	0.300268
ENSG00000094841	UPRT	139596	bisque4	0.310725	0.0736757	0.41088	0.0157831	0.172392	0.329593	0.300744	0.0839345	0.330386	0.0563416	0.0126435	0.943423	0.0330066	0.852985	-0.488764	0.00335616	-0.0466121	0.7935	0.185491	0.293589	0.202651	0.25038	0.0481938	0.786651	0.313046	0.0714359	-0.209834	0.233622	-0.472076	0.00482017	0.230956	0.188788	0.64643	3.62581e-05	-0.131111	0.459843
ENSG00000160883	HK3	3101	bisque4	-0.439296	0.0093401	-0.498078	0.0027205	-0.277767	0.111712	-0.388164	0.0233002	-0.420161	0.0133605	0.37827	0.0273933	0.0999685	0.573761	0.273024	0.118219	0.189159	0.283975	-0.33562	0.0523203	-0.0193633	0.913446	0.135117	0.446123	-0.0222956	0.900399	0.163162	0.356526	0.241549	0.168741	-0.0439078	0.805244	-0.406999	0.0168998	-0.170282	0.335637
ENSG00000128829	EIF2AK4	440275	bisque4	0.413289	0.0151216	0.408447	0.0164757	0.359822	0.0365989	0.434582	0.0102201	0.427857	0.0115964	-0.273738	0.117222	-0.0434865	0.807077	-0.435607	0.010023	0.0616681	0.728994	0.177176	0.31614	0.12927	0.466224	0.067036	0.706406	0.321684	0.0635651	-0.348193	0.0435916	-0.400807	0.018818	0.200579	0.255361	0.506185	0.00225521	-0.0811767	0.648112
ENSG00000260719	AC009133.17	NA	bisque4	0.0468456	0.792488	-0.222042	0.206907	-0.264913	0.129997	0.226264	0.198182	0.240504	0.17065	-0.185623	0.29324	-0.58443	0.000284144	0.0323985	0.855665	0.24552	0.161635	0.389907	0.0226342	-0.652321	2.91072e-05	-0.0897688	0.613643	-0.477275	0.00431424	0.109006	0.539437	0.715234	1.99994e-06	0.293218	0.0923727	-0.433043	0.0105222	0.230833	0.189031
ENSG00000135912	TTLL4	9654	bisque4	-0.0615795	0.729369	-0.217882	0.215762	-0.192371	0.275727	0.0243242	0.891388	0.053505	0.763772	-0.313185	0.0713036	-0.379011	0.0270678	0.251861	0.150735	0.0560155	0.753024	0.187107	0.289328	-0.396343	0.0203106	0.148719	0.401234	-0.463884	0.00572074	0.233402	0.184017	0.631717	6.15352e-05	-0.00702809	0.968533	-0.479076	0.00415002	0.227406	0.195865
ENSG00000139636	LMBR1L	55716	bisque4	-0.177536	0.315142	-0.282131	0.105966	-0.473833	0.00464377	-0.155588	0.379586	0.0723092	0.684454	-0.0341646	0.847886	-0.470023	0.00503356	0.406335	0.0170973	-0.0420575	0.813303	0.317863	0.0669576	-0.605637	0.000147424	-0.177614	0.314926	-0.741103	5.36249e-07	0.0782996	0.659821	0.869597	2.48414e-11	0.0539387	0.761912	-0.630574	6.40435e-05	0.434859	0.0101665
ENSG00000267898	CTD-2639E6.9	NA	bisque4	-0.130909	0.460539	-0.24887	0.155808	-0.598222	0.000186415	0.185356	0.293947	0.27922	0.109774	-0.132091	0.456464	-0.554891	0.000659498	-0.174027	0.324956	0.0253023	0.887048	0.61546	0.000107052	-0.53647	0.00107303	0.00901447	0.959646	-0.516549	0.00176246	-0.0804338	0.651127	0.579369	0.000330123	0.487098	0.00348245	-0.00795261	0.964396	0.27203	0.119619
ENSG00000215305	VPS16	64601	bisque4	-0.270067	0.122416	-0.279448	0.109472	-0.22834	0.193987	-0.086586	0.626322	-0.143279	0.418868	0.0618165	0.728366	-0.263496	0.13214	0.209562	0.234242	0.342942	0.0470828	-0.0729974	0.681607	-0.372857	0.0298717	-0.116777	0.510727	-0.246976	0.159083	0.323983	0.0615889	0.580641	0.000317986	0.116809	0.51061	-0.597894	0.00018834	-0.0680434	0.702193
ENSG00000068400	GRIPAP1	56850	bisque4	-0.185152	0.294486	-0.472765	0.00475033	-0.459949	0.00620244	-0.100557	0.571495	-0.0735307	0.679404	0.130452	0.46212	-0.423981	0.0124586	0.371215	0.0306587	0.165782	0.34875	0.231225	0.188259	-0.634239	5.63112e-05	-0.130746	0.461105	-0.595462	0.000203133	0.0618498	0.728226	0.803862	1.03343e-08	0.0803692	0.65139	-0.716746	1.85921e-06	0.355929	0.0388303
ENSG00000169282	KCNAB1	7881	bisque4	0.572872	0.000398792	0.0334816	0.850893	0.139229	0.432273	0.264323	0.130886	0.56156	0.000549078	-0.460821	0.00609273	-0.578156	0.000342076	0.214916	0.222232	-0.0280633	0.874814	0.467418	0.00531598	-0.645763	3.71608e-05	-0.226357	0.197993	-0.620928	8.91691e-05	0.114576	0.518778	0.649941	3.18264e-05	-0.0343952	0.846871	-0.416501	0.0142755	0.495449	0.00288834
ENSG00000213930	GALT	2592	bisque4	-0.29235	0.0933869	-0.26434	0.13086	-0.118594	0.504124	-0.476853	0.00435355	-0.369723	0.0313888	0.111813	0.528978	0.0531915	0.765118	0.600095	0.000175783	-0.10311	0.561719	-0.311727	0.0727019	-0.0928727	0.601384	-0.0537934	0.762536	-0.352979	0.0405938	0.368576	0.031959	0.463183	0.00580411	-0.391408	0.0220736	-0.643836	3.98823e-05	0.0622941	0.726348
ENSG00000154222	CC2D1B	200014	bisque4	-0.268282	0.125004	-0.336493	0.0516726	-0.489644	0.003291	-0.323609	0.0619072	-0.0318411	0.858123	0.15356	0.385904	-0.266375	0.127812	0.511584	0.00198531	-0.151839	0.391316	0.229871	0.190932	-0.517293	0.00173101	-0.289956	0.0962262	-0.697953	4.46231e-06	-0.00849935	0.96195	0.727845	1.0724e-06	-0.0572631	0.7477	-0.569091	0.000444351	0.517049	0.00174126
ENSG00000108469	RECQL5	9400	bisque4	-0.226523	0.197655	-0.421272	0.0130929	-0.148286	0.402621	-0.343197	0.0469083	-0.354106	0.0399123	0.0696155	0.695637	-0.0537346	0.762787	0.668925	1.52687e-05	0.0135403	0.939417	-0.196036	0.266506	-0.280345	0.10829	-0.114822	0.517876	-0.412198	0.0154181	0.108774	0.540303	0.552255	0.000708288	-0.351075	0.0417654	-0.825222	1.92508e-09	0.25783	0.140971
ENSG00000272034	SNORD14A	26822	bisque4	-0.063503	0.721246	-0.177422	0.315459	-0.303451	0.0810499	-0.047156	0.791143	0.116951	0.510093	-0.229011	0.192643	-0.46628	0.00544349	0.357265	0.0380523	0.0328647	0.85361	0.262964	0.132951	-0.58505	0.000278929	-0.305491	0.0789261	-0.67047	1.43493e-05	0.153754	0.385296	0.825329	1.90777e-09	0.0287802	0.871643	-0.630785	6.35744e-05	0.335256	0.0525926
ENSG00000177989	ODF3B	440836	bisque4	-0.388055	0.0233423	-0.48946	0.00330454	-0.516311	0.00177263	-0.119344	0.501413	-0.14905	0.400175	0.522454	0.00152612	-0.239348	0.172777	0.0845284	0.634575	0.310355	0.0740375	0.0880804	0.620356	-0.40832	0.0165127	-0.150481	0.395615	-0.203025	0.24949	0.00469089	0.978995	0.455526	0.00678481	0.328729	0.057664	-0.394371	0.0210005	0.0911239	0.608278
ENSG00000182179	UBA7	7318	bisque4	-0.361815	0.035497	-0.344363	0.0461167	-0.225326	0.200097	-0.281483	0.106805	-0.307914	0.0764604	0.325368	0.0604228	-0.0659042	0.711149	0.289513	0.0967586	0.270936	0.121172	-0.260435	0.13686	-0.213822	0.224651	-0.0504056	0.777101	-0.140208	0.429011	0.301639	0.0829722	0.435803	0.00998563	0.017689	0.920905	-0.585386	0.000276135	-0.11821	0.505517
ENSG00000113108	APBB3	10307	bisque4	-0.222923	0.205066	-0.249018	0.155554	-0.484974	0.00364947	-0.138837	0.433584	0.0726194	0.68317	-0.0752835	0.672181	-0.470125	0.00502269	0.308806	0.0755685	0.0105915	0.952594	0.292521	0.0931863	-0.563129	0.000525614	-0.189609	0.282809	-0.681243	9.2129e-06	0.146476	0.408453	0.836785	7.03279e-10	0.119097	0.502307	-0.551729	0.000718411	0.308107	0.0762673
ENSG00000163155	LYSMD1	388695	bisque4	-0.202499	0.250745	-0.387423	0.023588	-0.233794	0.183261	-0.312999	0.0714807	-0.219144	0.213049	0.0662955	0.709508	-0.146725	0.407646	0.549757	0.00075744	0.0122582	0.945144	-0.0685992	0.699873	-0.365193	0.0336915	-0.159162	0.368599	-0.488665	0.00336349	0.192826	0.27457	0.614043	0.000112183	-0.207809	0.238266	-0.728097	1.05877e-06	0.261035	0.135925
ENSG00000130023	ERMARD	55780	bisque4	-0.338994	0.0498518	-0.286217	0.100791	-0.465269	0.00555904	-0.419598	0.0134981	-0.159513	0.367528	0.164633	0.352148	-0.191747	0.277318	0.564611	0.000504269	-0.203175	0.249131	0.0776711	0.662389	-0.389779	0.0226826	-0.299378	0.0854208	-0.681212	9.22462e-06	0.209807	0.233683	0.709004	2.68859e-06	-0.145627	0.411205	-0.611618	0.00012148	0.38901	0.0229751
ENSG00000240682	ISY1	57461	bisque4	0.290813	0.0952026	0.0682082	0.701505	0.0060401	0.972955	0.554872	0.000659835	0.335276	0.0525773	-0.0410398	0.817744	-0.237347	0.176503	-0.667872	1.59254e-05	0.303228	0.0812848	0.377321	0.0278152	-0.0637836	0.720064	0.138818	0.433648	0.330438	0.0563002	-0.294017	0.0914475	-0.290085	0.0960708	0.508602	0.00213069	0.529994	0.00126507	-0.136668	0.440871
ENSG00000163513	TGFBR2	7048	bisque4	0.508362	0.00214279	0.0455686	0.798026	0.320936	0.0642179	0.432736	0.0105833	0.370616	0.03095	-0.223501	0.203862	-0.0383219	0.829632	-0.351242	0.041662	0.078494	0.659027	0.245486	0.161694	0.0258219	0.884743	0.0809183	0.64916	0.24456	0.163332	-0.396405	0.0202891	-0.372861	0.0298697	0.0717528	0.686758	0.414283	0.0148554	0.0460536	0.795922
ENSG00000280033	CTD-2095E4.3	NA	bisque4	0.31506	0.0695365	0.154521	0.382902	-0.0993037	0.576325	0.275727	0.114478	0.530912	0.00123612	-0.263677	0.131864	-0.610203	0.000127218	0.0440249	0.804734	0.0740176	0.677394	0.554026	0.00067517	-0.645287	3.78176e-05	-0.332181	0.0549354	-0.548513	0.000783034	-0.0899123	0.613074	0.618847	9.563e-05	0.202596	0.250513	-0.294458	0.0909404	0.503748	0.00238717
ENSG00000154760	SLFN13	146857	bisque4	-0.332144	0.0549648	-0.230477	0.189733	-0.356114	0.0387216	-0.341024	0.0484124	-0.12534	0.479996	0.168194	0.341684	-0.0967099	0.586375	0.366394	0.0330681	-0.0703983	0.69238	-0.0128508	0.942496	-0.263722	0.131797	-0.168703	0.340204	-0.43256	0.0106186	0.277111	0.112596	0.488715	0.00335981	-0.0675091	0.704427	-0.409206	0.0162569	0.175193	0.321673
ENSG00000173540	GMPPB	29925	bisque4	-0.25613	0.143704	-0.124544	0.482814	-0.0547256	0.758541	-0.129655	0.464883	-0.359616	0.0367143	0.0325934	0.854806	-0.0133351	0.940333	0.202039	0.251846	0.302117	0.0824623	-0.301355	0.0832767	-0.0841719	0.63601	0.0901897	0.611974	0.00650482	0.970875	0.251422	0.151471	0.281288	0.107059	-0.0525713	0.767781	-0.493162	0.00304157	-0.183083	0.30001
ENSG00000128699	ORMDL1	94101	bisque4	-0.173654	0.32601	-0.314087	0.0704496	-0.473841	0.0046429	-0.275434	0.114879	0.0605735	0.733628	-0.032154	0.856743	-0.314441	0.0701162	0.363646	0.0345092	-0.249209	0.155226	0.271224	0.120762	-0.404454	0.0176674	-0.141235	0.425603	-0.712034	2.33046e-06	0.155839	0.378807	0.692187	5.76161e-06	-0.0361635	0.839099	-0.383518	0.0251544	0.346424	0.0447438
ENSG00000259891	CTA-204B4.2	NA	bisque4	0.0332933	0.851722	-0.380258	0.0265268	-0.276954	0.112809	-0.0546844	0.758718	0.0592557	0.73922	-0.00352706	0.984205	-0.387284	0.0236423	0.376522	0.0281744	0.0176776	0.920956	0.274968	0.115518	-0.578782	0.000335864	-0.360585	0.0361738	-0.59893	0.000182334	-0.0556028	0.754788	0.699937	4.08122e-06	-0.0325349	0.855064	-0.604182	0.000154442	0.439358	0.00932891
ENSG00000204344	STK19	8859	bisque4	-0.176301	0.318573	-0.128184	0.470008	-0.53515	0.00110995	0.168061	0.34207	0.242232	0.167504	-0.180395	0.307284	-0.574218	0.000383599	-0.171192	0.33302	0.135375	0.445248	0.486011	0.00356709	-0.516796	0.00175197	-0.121888	0.492266	-0.484947	0.00365165	0.179908	0.308614	0.662485	1.97023e-05	0.479004	0.00415653	-0.137771	0.437158	0.0965099	0.587153
ENSG00000151498	ACAD8	27034	bisque4	-0.125427	0.479688	-0.0881347	0.620139	0.0536846	0.763002	-0.504415	0.00235042	-0.292976	0.0926544	-0.132815	0.453979	0.157727	0.372986	0.638008	4.92445e-05	-0.30342	0.0810825	-0.364196	0.0342168	0.0975869	0.582968	0.0900359	0.612584	-0.356026	0.0387732	0.45361	0.00705135	0.331412	0.0555348	-0.565326	0.000494244	-0.510985	0.0020138	0.0445679	0.802373
ENSG00000204991	SPIRE2	84501	bisque4	-0.0781119	0.660587	-0.362355	0.0352033	-0.409124	0.0162806	-0.06894	0.698452	0.0358328	0.840551	0.0123871	0.944568	-0.332188	0.0549304	0.335281	0.0525742	-0.0796485	0.654321	0.318151	0.066697	-0.48461	0.00367877	-0.190499	0.280515	-0.587601	0.000258335	-0.173117	0.327531	0.618105	9.80346e-05	-0.00587283	0.973704	-0.461805	0.00597113	0.407243	0.0168278
ENSG00000213066	FGFR1OP	11116	bisque4	-0.270198	0.122229	-0.149953	0.397293	-0.371939	0.0303097	-0.441309	0.00898428	-0.166392	0.346954	-0.0498817	0.77936	-0.0547469	0.75845	0.570598	0.000425667	-0.428308	0.0114996	0.0609288	0.732123	-0.181071	0.305446	-0.241951	0.168012	-0.654403	2.69032e-05	0.12808	0.470372	0.536751	0.0010653	-0.302886	0.0816452	-0.448743	0.00776869	0.395948	0.0204474
ENSG00000117505	DR1	1810	bisque4	0.243602	0.16504	0.143308	0.418772	0.573074	0.000396481	-0.0568371	0.749517	-0.135614	0.444436	-0.00445598	0.980046	0.545952	0.000838112	-0.0916917	0.606036	-0.110362	0.534372	-0.450274	0.00753665	0.615405	0.000107249	0.251646	0.151095	0.582118	0.000304388	-0.0262187	0.882984	-0.758925	1.97328e-07	-0.356286	0.0386212	0.402964	0.0181303	-0.320431	0.0646623
ENSG00000127022	CANX	NA	bisque4	0.147315	0.405745	0.307437	0.0769416	0.402035	0.0184239	0.228774	0.193117	0.024724	0.889613	-0.0972213	0.584388	0.351676	0.0413926	-0.465236	0.00556282	0.0527175	0.767153	-0.190243	0.281174	0.519543	0.00163893	0.322225	0.0630956	0.675649	1.16225e-05	-0.0993635	0.576094	-0.771934	8.99996e-08	0.0520717	0.769928	0.668809	1.53398e-05	-0.39529	0.0206766
ENSG00000113643	RARS	5917	bisque4	-0.21465	0.222817	-0.38992	0.0226295	-0.57057	0.000426007	-0.193655	0.272474	0.0115108	0.948484	0.119089	0.502333	-0.419279	0.0135764	0.399882	0.0191197	-0.0980264	0.581265	0.366523	0.0330017	-0.625562	7.6164e-05	-0.277912	0.111517	-0.765641	1.32399e-07	0.0420419	0.813371	0.827865	1.53933e-09	0.062724	0.724533	-0.58908	0.00024703	0.538421	0.00102044
ENSG00000169228	RAB24	53917	bisque4	-0.271209	0.120783	-0.323721	0.061812	-0.252462	0.14973	-0.0276156	0.876796	-0.101492	0.567905	0.152154	0.390322	-0.20844	0.236814	0.022849	0.89794	0.407234	0.0168305	-0.0557444	0.754183	-0.261399	0.135359	0.119234	0.50181	-0.0655093	0.712806	0.153342	0.386587	0.367252	0.0326282	0.243631	0.164989	-0.346744	0.044533	-0.136145	0.442639
ENSG00000069275	NUCKS1	64710	bisque4	0.23705	0.177061	0.260345	0.137	0.396035	0.0204169	-0.0320679	0.857122	-0.0560121	0.753039	-0.124796	0.481919	0.432928	0.010545	-0.00368108	0.983516	-0.321646	0.0635982	-0.175482	0.320863	0.466677	0.0053987	0.131443	0.458698	0.307626	0.0767505	-0.176832	0.317095	-0.617763	9.91602e-05	-0.368058	0.0322197	0.412944	0.0152147	-0.00141052	0.993683
ENSG00000157873	TNFRSF14	8764	bisque4	-0.274759	0.115807	-0.353634	0.0401968	-0.341723	0.0479242	0.0562497	0.752024	-0.117691	0.507402	0.0438791	0.805368	-0.378856	0.0271354	0.013571	0.93928	0.444352	0.00846849	0.0427591	0.810245	-0.414173	0.0148846	-0.0435294	0.80689	-0.205424	0.243819	0.27852	0.110705	0.568953	0.000446095	0.295464	0.0897901	-0.48671	0.00351243	-0.151611	0.392036
ENSG00000185347	C14orf80	283643	bisque4	-0.351429	0.0415458	-0.0678187	0.703133	-0.436639	0.00982781	-0.0890345	0.616558	-0.0549643	0.757519	0.129437	0.465641	-0.336936	0.0513468	0.177439	0.31541	0.0691924	0.6974	0.180102	0.308084	-0.426924	0.0117993	-0.186078	0.292038	-0.424152	0.0124196	0.22524	0.200274	0.610997	0.000123969	0.227245	0.196192	-0.442267	0.0088192	0.230173	0.190334
ENSG00000175711	B3GNTL1	146712	bisque4	-0.138915	0.433322	-0.306408	0.0779865	-0.362899	0.0349093	-0.0750572	0.673112	-0.0533487	0.764443	-0.184905	0.295143	-0.402915	0.0181458	0.338704	0.0500607	0.0586717	0.741703	0.201552	0.253013	-0.488725	0.00335906	-0.0605905	0.733557	-0.588651	0.00025026	0.128439	0.469118	0.74823	3.63105e-07	-0.0107834	0.951736	-0.613086	0.000115772	0.281327	0.107007
ENSG00000170430	MGMT	4255	bisque4	0.0101008	0.954788	0.412792	0.015256	0.213389	0.225613	0.203492	0.24838	0.0502985	0.777563	-0.0324853	0.855282	0.209929	0.233404	-0.532514	0.001187	0.0777265	0.662163	-0.133308	0.45229	0.457787	0.00648153	0.127831	0.47124	0.570524	0.000426566	-0.00326425	0.985382	-0.612981	0.000116172	0.237756	0.175738	0.630867	6.3391e-05	-0.448662	0.00778119
ENSG00000143321	HDGF	3068	bisque4	0.337088	0.0512349	0.253459	0.148074	0.5205	0.00160107	0.320697	0.0644278	0.217834	0.215867	-0.0226105	0.899	0.18571	0.29301	-0.524694	0.00144405	0.234525	0.181856	-0.169509	0.337867	0.340085	0.0490743	0.152741	0.388474	0.669745	1.4774e-05	-0.0595252	0.738076	-0.632259	6.03772e-05	0.179841	0.308797	0.552839	0.000697206	-0.43358	0.0104159
ENSG00000053900	ANAPC4	29945	bisque4	-0.24522	0.162163	-0.28488	0.102463	-0.372209	0.0301803	-0.544595	0.000868663	-0.162635	0.358102	0.0725483	0.683464	-0.0805925	0.650483	0.767599	1.17565e-07	-0.453134	0.00711897	0.0643748	0.717575	-0.313632	0.0708794	-0.276972	0.112783	-0.782524	4.56949e-08	0.119835	0.499642	0.671819	1.35883e-05	-0.396085	0.0203998	-0.629171	6.72479e-05	0.562755	0.00053113
ENSG00000237298	TTN-AS1	100506866	bisque4	-0.124964	0.481325	-0.26576	0.128728	-0.382307	0.0256571	-0.171682	0.33162	0.126231	0.476855	-0.0347164	0.845458	-0.329138	0.0573355	0.376527	0.0281723	-0.159942	0.366224	0.289301	0.0970136	-0.491604	0.00314992	-0.136215	0.442402	-0.68086	9.36206e-06	0.125372	0.479884	0.681263	9.20492e-06	0.0248985	0.88884	-0.450299	0.00753296	0.471482	0.00488109
ENSG00000115459	ELMOD3	84173	bisque4	-0.120467	0.497365	-0.248064	0.157196	-0.135181	0.445907	-0.396754	0.0201692	-0.184892	0.295177	0.0126517	0.943386	-0.0908677	0.609291	0.686384	7.40835e-06	-0.115727	0.51456	-0.130288	0.46269	-0.302414	0.0821459	-0.190767	0.279826	-0.557322	0.000617163	0.18654	0.290818	0.624636	7.86184e-05	-0.385523	0.0243398	-0.764933	1.3817e-07	0.286053	0.100995
ENSG00000037280	FLT4	2324	bisque4	-0.3999	0.0191137	-0.126472	0.476006	-0.636249	5.24358e-05	-0.0405169	0.820028	0.0974364	0.583553	0.248787	0.155949	-0.374537	0.0290838	-0.0267101	0.880807	0.0717606	0.686726	0.376703	0.028093	-0.451304	0.00738382	-0.0736231	0.679022	-0.402537	0.0182648	0.0484921	0.785361	0.515506	0.00180736	0.457209	0.00655797	-0.149323	0.399302	0.231041	0.188622
ENSG00000115211	EIF2B4	8890	bisque4	-0.308341	0.0760326	-0.197686	0.262422	0.0997752	0.574506	-0.681634	9.06273e-06	-0.572095	0.000407794	0.141734	0.423955	0.440711	0.00908874	0.721666	1.46151e-06	-0.274564	0.116076	-0.636814	5.13905e-05	0.269589	0.123105	-0.0438957	0.805296	-0.138789	0.433745	0.408026	0.0165983	0.122104	0.491494	-0.677744	1.06602e-05	-0.540874	0.000957553	-0.0490529	0.782938
ENSG00000215039	CD27-AS1	678655	bisque4	-0.192192	0.276182	-0.0947501	0.59402	0.0195726	0.912514	-0.603105	0.000159831	-0.383109	0.0253231	0.120694	0.496548	0.29356	0.0919761	0.722284	1.41745e-06	-0.300404	0.0843028	-0.431753	0.0107812	0.119924	0.499318	-0.0582933	0.743312	-0.297598	0.0873871	0.156202	0.377683	0.219991	0.211241	-0.602931	0.000160717	-0.563223	0.000524228	0.11447	0.519169
ENSG00000225880	LINC00115	79854	bisque4	-0.207154	0.239784	-0.427431	0.0116887	-0.518309	0.00168889	-0.158721	0.369943	0.0767435	0.666187	0.183763	0.298189	-0.352943	0.0406156	0.201619	0.252854	-0.0273948	0.877774	0.322254	0.06307	-0.448272	0.00784137	0.0254231	0.886512	-0.515366	0.00181345	-0.0920675	0.604554	0.595671	0.000201821	0.180853	0.306038	-0.324816	0.0608858	0.344398	0.0460926
ENSG00000231964	RP11-67C2.2	102724323	bisque4	-0.29385	0.0916408	-0.263174	0.132631	-0.378845	0.0271403	-0.367062	0.0327254	-0.203727	0.247821	0.0728271	0.682311	-0.154372	0.383367	0.640669	4.47491e-05	-0.142138	0.422621	0.0577629	0.74557	-0.430247	0.0110904	-0.267983	0.125441	-0.657118	2.42548e-05	0.150063	0.396944	0.695003	5.08927e-06	-0.239842	0.171865	-0.737636	6.4536e-07	0.4615	0.00600855
ENSG00000119335	SET	6418	bisque4	0.184209	0.296998	0.26698	0.126916	0.438543	0.00947611	0.11072	0.533037	0.0113674	0.949125	-0.00118444	0.994696	0.455303	0.00681549	-0.382639	0.0255187	-0.0816409	0.64623	-0.247084	0.158895	0.608263	0.000135477	0.23428	0.182326	0.658069	2.33844e-05	-0.147916	0.40381	-0.848632	2.30439e-10	-0.0719159	0.686083	0.70859	2.74135e-06	-0.369181	0.0316574
ENSG00000155906	RMND1	55005	bisque4	-0.334527	0.0531406	-0.197872	0.261964	-0.0240974	0.892395	-0.655899	2.54129e-05	-0.60186	0.000166262	0.320432	0.064661	0.726349	1.15671e-06	0.468339	0.00521454	-0.623217	8.25154e-05	-0.466225	0.00544973	0.633388	5.80262e-05	0.237595	0.176038	0.112592	0.526092	-0.115936	0.513796	-0.456168	0.00669749	-0.646626	3.59969e-05	0.132753	0.454193	0.0425719	0.811061
ENSG00000215912	TTC34	100287898	bisque4	-0.260733	0.136394	-0.365264	0.0336546	-0.355616	0.0390145	-0.24075	0.170199	-0.195978	0.266652	-0.00544965	0.975598	-0.249332	0.155017	0.578359	0.000340049	0.0128376	0.942555	0.0799079	0.653265	-0.48452	0.00368607	-0.138666	0.434156	-0.597666	0.000189682	0.0693162	0.696884	0.724818	1.24929e-06	-0.145369	0.412041	-0.797289	1.66424e-08	0.413651	0.015024
ENSG00000225697	SLC26A6	65010	bisque4	-0.186981	0.289658	-0.357305	0.0380291	-0.208064	0.237678	-0.182826	0.300701	-0.0902442	0.611759	-0.0749411	0.67359	-0.267037	0.126832	0.35903	0.0370439	0.147338	0.40567	-0.0470268	0.791703	-0.350703	0.041998	0.000968848	0.995661	-0.412841	0.0152429	0.287066	0.0997407	0.644275	3.92476e-05	-0.0448273	0.801246	-0.632749	5.93471e-05	0.0706643	0.691275
ENSG00000120093	HOXB3	3213	bisque4	-0.101313	0.568592	-0.00610849	0.972649	-0.173018	0.327812	-0.1868	0.290135	-0.0651755	0.714208	-0.017773	0.920531	-0.232971	0.184852	0.424723	0.0122896	-0.0528661	0.766514	0.0297656	0.867286	-0.331091	0.0557857	-0.0311606	0.861125	-0.464317	0.00566981	0.232856	0.185075	0.573638	0.000390086	-0.132874	0.453777	-0.560144	0.000571043	0.215688	0.220536
ENSG00000159496	RGL4	266747	bisque4	-0.302111	0.0824678	-0.269817	0.122777	-0.631757	6.14487e-05	0.130004	0.463673	0.111296	0.530895	0.0136318	0.939008	-0.511981	0.00196661	-0.126169	0.477073	0.152975	0.387739	0.474741	0.00455479	-0.518171	0.00169455	-0.0190353	0.914906	-0.418039	0.0138848	0.0466831	0.793192	0.596858	0.000194521	0.507949	0.00216371	-0.165065	0.35087	0.172088	0.330459
ENSG00000065357	DGKA	1606	bisque4	-0.0919074	0.605185	-0.180494	0.307015	-0.331605	0.0553835	0.00644718	0.971133	0.094475	0.595097	-0.331576	0.0554062	-0.459218	0.00629558	0.154587	0.382697	0.0866329	0.626134	0.24572	0.161282	-0.444124	0.00850631	0.0524267	0.768402	-0.5317	0.00121175	0.17195	0.330852	0.708839	2.70952e-06	0.0971472	0.584676	-0.41858	0.0137495	0.099984	0.573702
ENSG00000182512	GLRX5	51218	bisque4	0.351591	0.0414451	0.27375	0.117205	0.44172	0.00891309	0.316933	0.0678053	0.252115	0.15031	-0.0382061	0.830139	0.196158	0.266203	-0.580319	0.000321013	0.102916	0.562458	-0.072557	0.683428	0.412832	0.0152452	0.217347	0.21692	0.62313	8.27589e-05	-0.202256	0.251326	-0.691832	5.85175e-06	0.152096	0.390505	0.723471	1.33626e-06	-0.389787	0.0226796
ENSG00000166135	HIF1AN	55662	bisque4	-0.071951	0.685937	-0.231646	0.187434	-0.0127461	0.942964	-0.249772	0.154266	-0.209648	0.234045	-0.108876	0.539921	-0.131949	0.456955	0.558999	0.000589368	0.0597243	0.73723	-0.194874	0.269408	-0.290693	0.0953445	-0.0311287	0.861266	-0.418923	0.0136645	0.335385	0.0524962	0.595471	0.000203079	-0.322156	0.0631553	-0.787429	3.29592e-08	0.120711	0.496489
ENSG00000161509	GRIN2C	2905	bisque4	0.472061	0.00482171	0.147664	0.404619	-0.121984	0.491924	0.661165	2.07437e-05	0.685903	7.56218e-06	-0.488577	0.00337012	-0.929937	1.87101e-15	-0.202458	0.250842	0.287012	0.0998069	0.815186	4.35492e-09	-0.89484	9.59131e-13	-0.232113	0.186521	-0.572044	0.000408396	-0.0573281	0.747423	0.771434	9.28397e-08	0.472638	0.00476306	-0.301561	0.0830554	0.457637	0.00650127
ENSG00000113272	THG1L	54974	bisque4	0.0977676	0.582268	0.215859	0.220161	0.315484	0.0691415	0.0188793	0.915601	-0.100383	0.572165	0.116039	0.513421	0.452432	0.0072195	-0.202141	0.2516	-0.154489	0.383003	-0.222887	0.205141	0.529534	0.00127978	0.0212764	0.904931	0.506097	0.00225989	-0.120395	0.497626	-0.721318	1.4868e-06	-0.148834	0.400866	0.493972	0.00298651	-0.211816	0.229134
ENSG00000106328	FSCN3	29999	bisque4	-0.0211414	0.905532	-0.341343	0.0481891	-0.315221	0.0693862	0.0171132	0.923472	0.155109	0.381074	-0.118922	0.502938	-0.384377	0.0248028	0.140527	0.427951	0.043385	0.807519	0.296842	0.0882323	-0.439838	0.00924314	0.0651193	0.714445	-0.466469	0.00542212	-0.0252905	0.8871	0.572223	0.000406302	0.132565	0.454837	-0.313495	0.0710087	0.205537	0.243553
ENSG00000237441	RGL2	5863	bisque4	-0.122706	0.489344	-0.265572	0.129009	-0.235511	0.179972	-0.284356	0.103124	-0.0284932	0.872912	-0.103383	0.560677	-0.25973	0.137963	0.546568	0.000824565	-0.0796913	0.654147	0.0477506	0.788569	-0.422987	0.0126882	-0.237393	0.176417	-0.635079	5.46614e-05	0.166491	0.346663	0.72789	1.06997e-06	-0.196217	0.266057	-0.683655	8.32163e-06	0.311677	0.0727506
ENSG00000124226	RNF114	55905	bisque4	0.221748	0.207525	0.208545	0.236572	0.47201	0.00482686	0.117064	0.509681	-0.0869141	0.62501	0.193219	0.273575	0.35937	0.0368521	-0.293778	0.0917239	0.171331	0.332624	-0.377912	0.0275517	0.458713	0.00636064	0.0218118	0.90255	0.652331	2.90969e-05	0.0194107	0.913235	-0.645864	3.70229e-05	-0.0686159	0.699804	0.323196	0.0622599	-0.48434	0.00370067
ENSG00000162804	SNED1	25992	bisque4	0.105564	0.552394	0.184383	0.296533	-0.0399982	0.822295	0.192217	0.276118	0.162982	0.357065	-0.170038	0.33634	-0.409517	0.0161679	0.128001	0.470648	0.181342	0.30471	0.211324	0.230241	-0.467972	0.00525473	-0.247262	0.158585	-0.337016	0.0512879	0.243371	0.165453	0.490866	0.00320241	0.122014	0.491817	-0.463437	0.00577379	0.21708	0.217498
ENSG00000279396	AC130469.1	NA	bisque4	0.21917	0.212994	0.221893	0.207219	-0.0833549	0.639301	0.252746	0.149257	0.354189	0.0398626	-0.263617	0.131956	-0.53567	0.00109527	0.107227	0.546116	0.0526851	0.767292	0.440703	0.0090902	-0.617412	0.000100329	-0.223482	0.203902	-0.5328	0.00117841	0.167736	0.343019	0.607862	0.000137246	0.158014	0.372107	-0.404776	0.0175687	0.45002	0.00757477
ENSG00000231703	RP4-669H2.1	NA	bisque4	-0.0696806	0.695366	-0.203476	0.248417	-0.319666	0.0653392	-0.193995	0.271615	0.0976048	0.582899	0.0625206	0.725391	-0.297604	0.0873802	0.422719	0.0127507	-0.234627	0.181661	0.287716	0.0989417	-0.451508	0.00735398	-0.0917179	0.605933	-0.647238	3.51917e-05	0.00136031	0.993908	0.637438	5.02596e-05	-0.0581362	0.743981	-0.46031	0.00615683	0.558648	0.000595099
ENSG00000063046	EIF4B	1975	bisque4	0.240039	0.171503	0.330769	0.056039	0.339779	0.0492915	0.413167	0.0151545	0.163679	0.354983	-0.454178	0.00697142	0.0953621	0.591628	-0.52838	0.00131738	0.102349	0.564625	-0.00109719	0.995086	0.3718	0.0303764	0.30914	0.0752361	0.477048	0.00433532	-0.0114103	0.948933	-0.554216	0.000671709	0.122792	0.48904	0.600191	0.000175255	-0.417375	0.0140523
ENSG00000268006	PTOV1-AS1	100506033	bisque4	-0.150784	0.394654	-0.210633	0.231805	-0.395063	0.0207561	-0.221556	0.207928	0.056442	0.751203	-0.0362159	0.838868	-0.343018	0.0470307	0.418511	0.0137668	-0.194545	0.270232	0.272868	0.118437	-0.474628	0.00456579	-0.376067	0.0283811	-0.693281	5.4914e-06	0.0413782	0.816267	0.740324	5.5919e-07	-0.0648274	0.715671	-0.506423	0.00224266	0.447889	0.00790085
ENSG00000053501	USE1	55850	bisque4	-0.419999	0.0133999	-0.0589191	0.740651	-0.0702284	0.693087	-0.108887	0.539881	-0.362914	0.0349012	0.0704856	0.692018	0.386343	0.0240129	-0.350837	0.0419141	0.0811053	0.648401	-0.376842	0.0280303	0.623485	8.1767e-05	0.507294	0.00219732	0.580842	0.000316101	0.107566	0.544839	-0.546905	0.000817234	0.11409	0.520565	0.499787	0.00261602	-0.660845	2.10035e-05
ENSG00000196123	KIAA0895L	653319	bisque4	-0.149336	0.39926	-0.226579	0.197541	-0.372623	0.0299827	-0.0745663	0.675133	0.0695355	0.69597	-0.0188425	0.915765	-0.461319	0.00603097	0.298066	0.0868663	0.140241	0.428902	0.221729	0.207565	-0.588297	0.000252961	-0.250685	0.152716	-0.589242	0.000245818	0.192072	0.276487	0.815671	4.19109e-09	0.141273	0.425478	-0.637165	5.07513e-05	0.242468	0.167078
ENSG00000228323	AC008753.6	NA	bisque4	-0.0404307	0.820405	-0.325734	0.0601171	-0.274172	0.116618	0.086311	0.627423	0.0625951	0.725077	-0.0770813	0.664803	-0.497006	0.00278789	0.210585	0.231914	0.193739	0.272261	0.275381	0.114951	-0.604886	0.000151011	-0.032668	0.854477	-0.485485	0.00360868	0.104286	0.557239	0.722366	1.41172e-06	0.15411	0.384186	-0.568889	0.000446908	0.298298	0.0866097
ENSG00000100246	DNAL4	10126	bisque4	-0.399493	0.0192477	-0.095087	0.592703	0.104488	0.556472	-0.442177	0.00883466	-0.641503	4.34187e-05	0.308608	0.0757656	0.791318	2.52817e-08	0.0422439	0.81249	-0.164187	0.353471	-0.695815	4.90918e-06	0.850298	1.95506e-10	0.259111	0.138938	0.620727	8.9775e-05	-0.0945106	0.594957	-0.752474	2.86108e-07	-0.354826	0.0394825	0.333217	0.054137	-0.490844	0.00320401
ENSG00000136261	BZW2	28969	bisque4	0.0630693	0.723075	0.387667	0.0234928	0.4533	0.00709529	-0.0230307	0.897132	-0.170017	0.3364	-0.0178516	0.920181	0.53021	0.00125821	-0.181018	0.305588	-0.127014	0.474104	-0.407255	0.0168241	0.653879	2.74427e-05	0.0972986	0.584087	0.606566	0.000143093	-0.0472265	0.790837	-0.762152	1.63158e-07	-0.232767	0.185249	0.496497	0.00282039	-0.387131	0.0237022
ENSG00000172888	ZNF621	285268	bisque4	-0.157031	0.375125	-0.259108	0.138943	-0.378326	0.0273686	-0.292408	0.0933189	-0.00708014	0.9683	0.00953444	0.95732	-0.331387	0.0555541	0.601437	0.000168501	-0.184842	0.29531	0.216869	0.217958	-0.556481	0.000631519	-0.270516	0.121772	-0.799258	1.44555e-08	0.200021	0.256713	0.832043	1.07261e-09	-0.161679	0.360973	-0.708357	2.77134e-06	0.542806	0.000910457
ENSG00000196821	C6orf106	64771	bisque4	0.0798539	0.653485	0.171806	0.331264	0.351091	0.0417555	0.155328	0.380393	-0.0703547	0.692562	0.283384	0.104358	0.381954	0.0258052	-0.370983	0.0307715	0.242609	0.166823	-0.295176	0.0901178	0.413695	0.0150122	0.139713	0.430659	0.727546	1.0888e-06	-0.13785	0.43689	-0.741713	5.18901e-07	0.111962	0.528425	0.451441	0.0073637	-0.391714	0.0219608
ENSG00000168404	MLKL	197259	bisque4	-0.177461	0.315348	-0.416473	0.0142829	-0.449635	0.00763282	-0.323093	0.0623483	-0.0689414	0.698446	0.195622	0.267538	-0.247813	0.157629	0.59356	0.000215425	-0.184985	0.29493	0.22227	0.206429	-0.533637	0.0011536	-0.299684	0.085086	-0.720392	1.5562e-06	-0.0558717	0.753639	0.727175	1.10947e-06	-0.158084	0.371891	-0.643544	4.03104e-05	0.578751	0.000336165
ENSG00000131378	RFTN1	23180	bisque4	0.0566286	0.750407	0.381507	0.0259939	0.401257	0.0186729	0.231177	0.188354	-0.106797	0.547733	0.032533	0.855072	0.354821	0.0394852	-0.425537	0.0121064	0.249497	0.154734	-0.335468	0.0524342	0.487669	0.00343871	0.0127308	0.943032	0.73846	6.17736e-07	0.0112191	0.949788	-0.71576	1.94998e-06	0.0884304	0.618962	0.448695	0.00777616	-0.547012	0.00081492
ENSG00000161647	MPP3	4356	bisque4	-0.0638664	0.719716	-0.323426	0.0620634	-0.308618	0.0757561	-0.259512	0.138306	0.0426414	0.810758	0.0782853	0.659879	-0.2849	0.102437	0.427405	0.0116944	-0.127076	0.473886	0.171267	0.332805	-0.445819	0.00822897	-0.159012	0.369055	-0.610212	0.000127178	0.122405	0.49042	0.665602	1.74281e-05	-0.0882712	0.619596	-0.505033	0.00231676	0.381675	0.025923
ENSG00000105699	LSR	51599	bisque4	-0.227539	0.195598	-0.217683	0.216192	-0.233916	0.183026	-0.204545	0.245887	-0.235408	0.180169	0.152779	0.388354	-0.167109	0.344851	0.358638	0.0372663	0.0662079	0.709875	-0.0604563	0.734126	-0.329571	0.0569888	-0.212949	0.226594	-0.367204	0.0326527	0.40667	0.0169975	0.55104	0.000731843	-0.0690645	0.697933	-0.593104	0.000218464	0.13358	0.451361
ENSG00000074935	TUBE1	51175	bisque4	-0.0849631	0.632828	-0.31632	0.0683674	-0.390837	0.0222855	-0.348532	0.0433731	-0.10533	0.553279	0.148129	0.403126	-0.167036	0.345066	0.658474	2.30226e-05	-0.352448	0.0409175	0.214823	0.222436	-0.434288	0.0102772	-0.427448	0.011685	-0.760051	1.84731e-07	-0.101695	0.56713	0.642314	4.2158e-05	-0.309941	0.0744447	-0.627241	7.18934e-05	0.653874	2.74485e-05
ENSG00000280195	XX-FW83563B9.5	NA	bisque4	-0.191719	0.277388	-0.266815	0.12716	-0.374933	0.0289006	-0.0511686	0.773814	0.0372751	0.83422	-0.122874	0.488747	-0.390514	0.022406	0.312986	0.0714933	0.0474136	0.790027	0.264112	0.131205	-0.521964	0.00154464	-0.25731	0.141803	-0.564121	0.000511236	0.00538547	0.975885	0.709322	2.64878e-06	0.0642009	0.718307	-0.548711	0.000778915	0.315923	0.0687341
ENSG00000259781	RP11-673C5.1	NA	bisque4	0.223607	0.203643	0.154314	0.383547	0.151842	0.391305	0.284584	0.102836	0.198978	0.259252	0.00228406	0.989771	0.0655096	0.712805	-0.499885	0.00261016	0.115999	0.513564	0.0792371	0.655997	0.207158	0.239775	0.0795298	0.654804	0.409371	0.0162097	-0.158143	0.371711	-0.469044	0.00513812	0.277289	0.112355	0.565074	0.000497762	-0.22707	0.196544
ENSG00000197182	MIRLET7BHG	400931	bisque4	-0.15267	0.388697	-0.327387	0.0587536	-0.359103	0.0370031	-0.121973	0.491964	-0.111386	0.53056	-0.0335159	0.850741	-0.324095	0.0614942	0.516656	0.00175789	-0.02567	0.885417	0.214029	0.224191	-0.531041	0.00123209	-0.114784	0.518014	-0.61147	0.000122067	-0.0631941	0.722549	0.695973	4.87482e-06	-0.115864	0.514057	-0.704743	3.27751e-06	0.519206	0.00165243
ENSG00000148824	MTG1	92170	bisque4	-0.173596	0.326175	-0.314901	0.069685	-0.220351	0.210476	-0.239417	0.17265	-0.160797	0.363634	0.0213594	0.904562	-0.231132	0.188442	0.547277	0.000809197	0.0586057	0.741983	-0.0221981	0.900832	-0.432775	0.0105756	-0.276119	0.113942	-0.524178	0.00146261	0.206312	0.241741	0.691685	5.88949e-06	-0.178167	0.313397	-0.780984	5.05447e-08	0.270414	0.121919
ENSG00000119771	KLHL29	114818	bisque4	-0.205722	0.243121	-0.373802	0.0294262	-0.448054	0.00787514	-0.0781239	0.660539	0.0396803	0.823686	0.0711688	0.68918	-0.400918	0.0187823	0.330023	0.0566289	-0.00461299	0.979343	0.345734	0.0451996	-0.586944	0.000263502	-0.384904	0.0245891	-0.598187	0.000186621	-0.128836	0.467732	0.708964	2.69374e-06	0.0987141	0.578603	-0.541837	0.000933808	0.529565	0.00127879
ENSG00000271862	RP11-343L5.2	NA	bisque4	-0.187991	0.287015	-0.277268	0.112383	-0.435604	0.0100235	-0.138762	0.433836	-0.00892683	0.960038	-0.0744492	0.675615	-0.381163	0.0261398	0.379374	0.0269094	-0.0308247	0.862608	0.281664	0.106571	-0.551763	0.000717738	-0.235647	0.179715	-0.673734	1.25704e-05	0.0818171	0.645517	0.76849	1.11332e-07	0.00457492	0.979514	-0.588512	0.000251314	0.427169	0.0117457
ENSG00000272140	RP11-574K11.29	NA	bisque4	-0.145852	0.410474	-0.328779	0.0576242	-0.287625	0.0990538	-0.352274	0.0410246	-0.140329	0.428609	-0.0496324	0.780436	-0.208478	0.236725	0.616138	0.000104673	-0.24105	0.169652	0.0721658	0.685047	-0.353254	0.0404268	-0.104473	0.556531	-0.664021	1.855e-05	0.153226	0.38695	0.69534	5.0138e-06	-0.313913	0.0706132	-0.661438	2.05247e-05	0.396543	0.0202416
ENSG00000235706	DICER1-AS1	400242	bisque4	-0.284343	0.10314	-0.457297	0.00654622	-0.312955	0.0715231	-0.27414	0.116663	-0.293036	0.0925847	0.155665	0.379346	-0.028855	0.871312	0.246451	0.16	0.0846539	0.63407	-0.116978	0.509994	-0.0855287	0.630557	0.29244	0.0932818	-0.180472	0.307074	-0.00179004	0.991984	0.289159	0.0971852	-0.0730547	0.68137	-0.341274	0.0482371	-0.00811469	0.963671
ENSG00000228242	AC093495.4	NA	bisque4	-0.274355	0.116365	-0.101109	0.569375	-0.172937	0.328042	-0.360279	0.0363434	-0.239298	0.172869	-0.0545899	0.759122	0.010859	0.951398	0.5239	0.00147269	-0.177688	0.314722	-0.122072	0.49161	-0.138228	0.435623	-0.0572028	0.747957	-0.412146	0.0154325	0.234595	0.181723	0.407701	0.0166931	-0.30227	0.082299	-0.503515	0.00240015	0.278995	0.110072
ENSG00000110455	ACCS	84680	bisque4	-0.11119	0.531289	-0.325185	0.0605754	-0.230948	0.188805	-0.10906	0.539232	-0.0948793	0.593515	-0.209616	0.234119	-0.324974	0.0607529	0.354652	0.0395858	0.112437	0.526664	0.0616032	0.729269	-0.405394	0.0173808	-0.0983388	0.580055	-0.485025	0.00364534	0.0694652	0.696263	0.671626	1.36951e-05	-0.0827752	0.641642	-0.643576	4.02642e-05	0.13177	0.457571
ENSG00000163950	SLBP	7884	bisque4	0.331592	0.055394	0.312987	0.0714921	0.588803	0.00024911	-0.0531722	0.765201	-0.0251306	0.88781	-0.153677	0.385538	0.504501	0.0023457	-0.129737	0.464601	-0.219499	0.21229	-0.384924	0.0245807	0.632967	5.88926e-05	0.0921507	0.604226	0.499262	0.00264776	-0.0422025	0.812671	-0.717571	1.78634e-06	-0.36681	0.0328544	0.493601	0.00301161	-0.356061	0.0387527
ENSG00000170275	CRTAP	10491	bisque4	0.213242	0.22594	0.322615	0.0627591	0.438136	0.00955036	0.40046	0.0189307	0.134157	0.44939	-0.207547	0.238872	0.206264	0.241854	-0.665898	1.72257e-05	0.256382	0.143296	-0.162896	0.357323	0.491165	0.00318107	0.295538	0.0897051	0.761584	1.68756e-07	-0.110338	0.53446	-0.748967	3.48504e-07	0.226016	0.198687	0.706452	3.02844e-06	-0.616392	0.000103793
ENSG00000183401	CCDC159	126075	bisque4	-0.188742	0.285059	-0.317437	0.0673449	-0.291821	0.094009	0.040091	0.82189	-0.0233808	0.895577	-0.0742743	0.676336	-0.450151	0.00755514	0.0601886	0.73526	0.353251	0.0404284	0.0906658	0.610089	-0.425673	0.0120759	0.072316	0.684425	-0.303555	0.0809402	0.305519	0.078897	0.661278	2.06524e-05	0.232693	0.185392	-0.516967	0.00174475	-0.0875489	0.622475
ENSG00000213983	AP1G2	8906	bisque4	-0.106468	0.548974	-0.280622	0.107928	-0.226563	0.197573	-0.196034	0.26651	-0.0613498	0.730341	-0.07735	0.663703	-0.345734	0.0451994	0.480613	0.00401416	0.0591129	0.739827	0.0483924	0.785792	-0.494366	0.00296004	-0.185115	0.294585	-0.595293	0.0002042	0.309905	0.0744801	0.79874	1.50035e-08	-0.115747	0.514486	-0.763109	1.54128e-07	0.237857	0.175548
ENSG00000158864	NDUFS2	4720	bisque4	-0.484201	0.00371193	-0.105424	0.552921	0.131479	0.458573	-0.584396	0.000284432	-0.731182	9.0418e-07	0.41189	0.0155028	0.920518	1.3141e-14	0.129589	0.465114	-0.261121	0.13579	-0.807529	7.86057e-09	0.94359	6.44122e-17	0.360992	0.0359488	0.644615	3.87609e-05	0.0141796	0.936562	-0.821973	2.52136e-09	-0.457316	0.00654379	0.348563	0.0433533	-0.505229	0.00230618
ENSG00000048991	R3HDM1	23518	bisque4	0.0311278	0.86127	0.128132	0.47019	0.0799155	0.653234	0.257381	0.141689	0.0874989	0.622674	0.0529518	0.766146	0.129451	0.465594	-0.407604	0.0167217	0.0484735	0.785442	0.0935535	0.598709	0.226011	0.198697	0.189386	0.283387	0.408638	0.0164204	-0.158748	0.369859	-0.508032	0.00215948	0.242104	0.167736	0.534666	0.00112375	-0.106782	0.547789
ENSG00000166454	ATMIN	23300	bisque4	0.18955	0.282964	0.191191	0.278738	0.268673	0.124434	0.372703	0.0299449	0.271984	0.119684	0.0409052	0.818332	0.108878	0.539914	-0.676806	1.10816e-05	0.22943	0.191809	0.0234686	0.895187	0.295251	0.0900327	0.2071	0.239909	0.624779	7.82339e-05	-0.197737	0.262296	-0.62826	6.94062e-05	0.381865	0.0258428	0.715882	1.93851e-06	-0.387584	0.0235252
ENSG00000101868	POLA1	5422	bisque4	0.115165	0.51662	0.394059	0.0211115	0.557722	0.000610432	-0.231877	0.186982	-0.207471	0.239049	-0.00417927	0.981285	0.537936	0.0010333	0.301819	0.0827794	-0.245032	0.162496	-0.51051	0.00203663	0.497796	0.0027381	-0.166291	0.347251	0.321419	0.0637952	0.0455105	0.798278	-0.496788	0.00280174	-0.53388	0.00114651	0.0135493	0.939376	-0.0587568	0.741341
ENSG00000138640	FAM13A	10144	bisque4	-0.230942	0.188817	-0.282539	0.10544	-0.26505	0.129791	-0.508114	0.00215531	-0.26864	0.124481	0.0270189	0.879439	0.0387391	0.827805	0.663528	1.89134e-05	-0.443287	0.00864608	-0.0489246	0.783492	-0.0884122	0.619034	0.0298209	0.867042	-0.546937	0.000816542	0.0837711	0.637624	0.451449	0.0073626	-0.456982	0.00658817	-0.477815	0.00426445	0.417086	0.014126
ENSG00000108465	CDK5RAP3	80279	bisque4	-0.124334	0.483555	-0.229563	0.191544	-0.310106	0.0742818	-0.102879	0.562599	0.0528769	0.766468	-0.138921	0.433301	-0.448502	0.00780581	0.335106	0.0527052	0.0980554	0.581152	0.171235	0.332898	-0.537526	0.00104427	-0.110469	0.533971	-0.607722	0.000137867	0.28584	0.10126	0.821191	2.68835e-09	0.0382969	0.829741	-0.645032	3.81734e-05	0.20132	0.253573
ENSG00000158106	RHPN1	114822	bisque4	-0.262779	0.133234	-0.23214	0.186468	-0.256237	0.14353	-0.0530388	0.765773	-0.0934778	0.599006	0.0378969	0.831494	-0.219932	0.211366	0.113856	0.521428	0.192414	0.275617	-0.00511494	0.977096	-0.263749	0.131756	-0.237763	0.175724	-0.229928	0.19082	0.27418	0.116608	0.433777	0.0103771	0.151407	0.392679	-0.389788	0.0226791	-0.0534728	0.76391
ENSG00000260285	RP11-600F24.7	NA	bisque4	-0.391623	0.0219941	-0.215347	0.221283	-0.41547	0.0145428	-0.270095	0.122377	-0.251731	0.150953	0.326529	0.0594586	-0.159249	0.368334	0.29027	0.0958502	0.101361	0.568407	-0.0498594	0.779456	-0.268449	0.124759	-0.0629981	0.723376	-0.301472	0.0831516	0.241903	0.1681	0.494096	0.00297817	0.0867841	0.62553	-0.513287	0.00190623	0.105573	0.552357
ENSG00000125740	FOSB	2354	bisque4	-0.160708	0.363905	-0.341388	0.0481574	-0.489281	0.00331775	0.111977	0.528367	0.0442472	0.803767	-0.00262532	0.988243	-0.418234	0.0138361	0.0844268	0.634984	0.0127516	0.94294	0.470874	0.00494408	-0.515589	0.00180373	-0.00731033	0.96727	-0.44399	0.00852856	-0.280363	0.108266	0.519056	0.00165847	0.230762	0.18917	-0.250416	0.15317	0.436637	0.00982814
ENSG00000262877	RP11-1055B8.4	NA	bisque4	-0.104782	0.555356	-0.168534	0.340693	-0.177654	0.314815	-0.12509	0.480879	0.00081319	0.996358	-0.185024	0.294827	-0.308447	0.0759264	0.425913	0.0120225	0.0513936	0.772845	0.0677613	0.703372	-0.437241	0.00971546	-0.219093	0.213159	-0.536355	0.00107619	0.285019	0.102289	0.681356	9.16929e-06	-0.0969121	0.585589	-0.650798	3.08225e-05	0.194483	0.270388
ENSG00000122068	FYTTD1	84248	bisque4	0.152243	0.390039	0.220273	0.210642	-0.0328303	0.853762	0.27012	0.12234	0.347615	0.0439651	0.10799	0.543246	0.0406822	0.819306	-0.524345	0.00145658	-0.114239	0.520018	0.33049	0.0562596	0.143835	0.417047	-0.00594717	0.973371	0.251025	0.152141	-0.290591	0.0954667	-0.473292	0.00469743	0.350612	0.0420548	0.749872	3.31305e-07	0.0160812	0.928075
ENSG00000154059	IMPACT	55364	bisque4	0.386443	0.0239731	0.260397	0.136918	0.48602	0.0035664	0.0565755	0.750633	0.0780852	0.660696	-0.313578	0.0709302	0.278135	0.111218	-0.0209236	0.906501	-0.303646	0.0808449	-0.120135	0.498559	0.408953	0.0163295	0.373839	0.0294089	0.238792	0.173807	-0.0786885	0.658233	-0.483374	0.00377983	-0.362945	0.0348844	0.36013	0.0364267	-0.0551559	0.7567
ENSG00000163482	STK36	27148	bisque4	-0.262622	0.133475	-0.204249	0.246584	0.00284992	0.987237	-0.323899	0.0616607	-0.449787	0.00760983	-0.0147765	0.933897	0.141191	0.425748	0.49461	0.00294374	0.0764139	0.667539	-0.439999	0.00921455	0.0589114	0.740683	0.185488	0.293597	-0.0923963	0.603258	0.337053	0.0512604	0.238297	0.174728	-0.35386	0.0400606	-0.600674	0.000172608	-0.098409	0.579783
ENSG00000186648	LRRC16B	90668	bisque4	-0.260931	0.136086	-0.235327	0.180324	-0.183617	0.298578	-0.260522	0.136723	-0.131543	0.458352	0.259484	0.13835	-0.0757283	0.670353	0.437837	0.00960528	0.027915	0.875471	-0.0862536	0.627652	-0.268308	0.124966	-0.245448	0.161762	-0.301713	0.0828929	0.107418	0.545396	0.417526	0.0140142	-0.0729351	0.681864	-0.564425	0.000506905	0.229254	0.19216
ENSG00000260942	CAPN10-AS1	NA	bisque4	-0.198532	0.260344	-0.161029	0.362934	-0.345085	0.0456318	-0.0726965	0.682851	0.0223257	0.900265	-0.0355892	0.841621	-0.418776	0.0137009	0.157881	0.372514	0.136704	0.440748	0.155531	0.379761	-0.446989	0.00804215	0.0153765	0.931219	-0.457005	0.00658507	0.348754	0.043231	0.692291	5.7354e-06	0.171246	0.332866	-0.470863	0.00494523	0.0697677	0.695004
ENSG00000182551	ADI1	55256	bisque4	0.0564842	0.751023	0.49348	0.00301982	0.231651	0.187425	0.195259	0.268443	0.145764	0.410759	-0.109989	0.53576	0.208848	0.235876	-0.517416	0.00172586	-0.0728102	0.682381	-0.0352294	0.843203	0.437342	0.00969665	0.210175	0.232845	0.487301	0.00346682	0.052096	0.769824	-0.593001	0.000219159	0.195541	0.267739	0.736479	6.86047e-07	-0.367746	0.0323773
ENSG00000140859	KIFC3	3801	bisque4	-0.0999673	0.573766	-0.455186	0.00683158	-0.304247	0.0802156	0.142454	0.421578	0.0527485	0.767019	-0.171794	0.331298	-0.405685	0.0172926	-0.184968	0.294976	0.287934	0.0986753	0.197453	0.262997	-0.294798	0.0905495	0.326016	0.0598828	-0.169106	0.339034	0.12107	0.495199	0.433918	0.0103496	0.341674	0.0479582	-0.144127	0.416092	-0.121051	0.495266
ENSG00000242861	RP11-285F7.2	NA	bisque4	-0.129562	0.465208	-0.221671	0.207686	-0.462124	0.00593212	-0.244353	0.163701	0.132759	0.454173	0.102691	0.563317	-0.386868	0.0238058	0.398111	0.0197081	-0.25802	0.140668	0.356025	0.0387739	-0.534188	0.00113753	-0.322408	0.0629373	-0.767388	1.19086e-07	0.105178	0.553856	0.765638	1.32418e-07	0.00382061	0.982891	-0.438705	0.00944678	0.503057	0.00242579
ENSG00000171469	ZNF561	93134	bisque4	0.507752	0.00217377	0.240229	0.171154	0.599326	0.00018008	0.178781	0.311706	0.0977993	0.582145	-0.209546	0.234279	0.256783	0.14265	-0.0687318	0.69932	-0.0406513	0.819441	-0.198951	0.259319	0.349204	0.0429435	0.196971	0.264186	0.375011	0.0288646	-0.211509	0.229824	-0.512342	0.00194978	-0.302775	0.081763	0.228411	0.193843	-0.166917	0.345413
ENSG00000116213	WRAP73	49856	bisque4	-0.283471	0.104247	-0.304442	0.0800131	-0.132308	0.455719	-0.303647	0.0808439	-0.411742	0.0155437	0.0607153	0.733028	-0.0107944	0.951686	0.370453	0.0310298	0.159345	0.368041	-0.331978	0.0550937	-0.0736202	0.679034	0.0925074	0.602821	-0.163395	0.355831	0.430656	0.0110057	0.392034	0.0218432	-0.206891	0.240393	-0.597835	0.000188687	-0.165797	0.348708
ENSG00000064201	TSPAN32	10077	bisque4	-0.155528	0.379773	-0.203326	0.248773	-0.0702793	0.692875	-0.276265	0.113743	-0.177205	0.316061	0.0300809	0.865893	-0.134538	0.448092	0.501477	0.00251616	0.130279	0.462721	-0.210875	0.231256	-0.29768	0.0872956	-0.178109	0.313558	-0.367234	0.0326377	0.344476	0.04604	0.581938	0.00030602	-0.201496	0.253148	-0.747239	3.8363e-07	0.0667395	0.707648
ENSG00000143753	DEGS1	8560	bisque4	0.301724	0.0828813	0.380131	0.0265812	0.55509	0.000655931	0.0977434	0.582362	0.0296601	0.867752	-0.0962605	0.588124	0.389015	0.0229729	-0.285409	0.101799	-0.0343474	0.847081	-0.334639	0.0530561	0.572418	0.000404035	0.26027	0.137117	0.588838	0.000248845	0.0349912	0.84425	-0.700397	3.99714e-06	-0.152582	0.388973	0.507613	0.00218087	-0.428058	0.0115533
ENSG00000122034	GTF3A	2971	bisque4	0.0843199	0.635414	0.218052	0.215395	0.204699	0.245523	0.237842	0.175577	0.224302	0.202204	0.0524351	0.768366	0.153234	0.386925	-0.68699	7.21809e-06	0.125238	0.480357	-0.0477105	0.788742	0.434318	0.0102713	0.274568	0.11607	0.615611	0.000106517	-0.0770248	0.665034	-0.633963	5.68618e-05	0.346153	0.0449221	0.813496	4.97268e-09	-0.490751	0.0032107
ENSG00000110768	GTF2H1	2965	bisque4	-0.419322	0.0135659	-0.0952667	0.592001	0.095583	0.590766	-0.631536	6.19252e-05	-0.626773	7.30622e-05	0.371807	0.0303731	0.861446	6.16487e-11	0.29963	0.0851451	-0.441414	0.00896612	-0.674285	1.22909e-05	0.818053	3.46666e-09	0.111126	0.531526	0.405179	0.0174461	-0.0198943	0.911081	-0.688187	6.85568e-06	-0.535669	0.00109529	0.27314	0.118057	-0.250466	0.153085
ENSG00000101751	POLI	11201	bisque4	0.00590259	0.97357	-0.251374	0.151552	-0.19043	0.280693	-0.377934	0.0275422	0.0139302	0.937675	-0.0272625	0.87836	-0.219961	0.211305	0.706883	2.9685e-06	-0.310001	0.0743853	0.107847	0.543781	-0.440326	0.00915653	-0.253823	0.147472	-0.777149	6.47544e-08	0.166296	0.347238	0.748813	3.51496e-07	-0.365103	0.0337386	-0.701837	3.74413e-06	0.555519	0.000648329
ENSG00000174917	C19orf70	125988	bisque4	0.0986991	0.578661	0.295669	0.0895572	0.397712	0.0198426	0.302042	0.0825419	0.0612689	0.730683	0.00457537	0.979512	0.209498	0.234388	-0.652925	2.84519e-05	0.345218	0.0455427	-0.275746	0.114452	0.488688	0.00336184	0.266779	0.127214	0.815435	4.26994e-09	0.00637633	0.97145	-0.686725	7.30086e-06	0.291272	0.0946575	0.623327	8.22076e-05	-0.66768	1.60475e-05
ENSG00000116954	RRAGC	64121	bisque4	0.130507	0.46193	0.252026	0.150458	0.433638	0.0104046	-0.0834482	0.638925	-0.0691562	0.697551	0.198764	0.259776	0.528566	0.00131126	-0.21522	0.221562	-0.112426	0.526704	-0.380403	0.0264645	0.579741	0.000326534	0.00714923	0.967991	0.590761	0.000234714	-0.0760124	0.669186	-0.751005	3.10875e-07	-0.157257	0.37443	0.531196	0.00122727	-0.311168	0.0732442
ENSG00000161654	LSM12	124801	bisque4	0.10215	0.565386	0.134032	0.449818	0.0783226	0.659727	0.334084	0.0534764	0.21865	0.214107	0.121988	0.491912	0.107987	0.543255	-0.690141	6.29965e-06	0.0939593	0.597117	0.137425	0.438318	0.309194	0.0751822	0.180242	0.307701	0.553715	0.000680878	-0.224946	0.200878	-0.629923	6.55118e-05	0.416254	0.0143392	0.818294	3.40022e-09	-0.301115	0.0835344
ENSG00000120314	WDR55	54853	bisque4	-0.03488	0.844739	-0.224027	0.202773	-0.306318	0.0780781	0.108513	0.541282	0.158604	0.370302	-0.19855	0.260299	-0.601275	0.000169369	0.224379	0.202045	0.242641	0.166765	0.321626	0.0636154	-0.70408	3.37904e-06	-0.173508	0.326424	-0.611693	0.000121184	0.17968	0.309237	0.881389	5.95452e-12	0.187298	0.288828	-0.66721	1.6351e-05	0.258384	0.140089
ENSG00000245149	RNF139-AS1	101927612	bisque4	-0.0798302	0.653582	-0.154525	0.382889	-0.319863	0.0651643	0.113416	0.523048	0.149378	0.399127	-0.208494	0.236689	-0.557008	0.000622496	0.115094	0.516877	0.184221	0.296966	0.33324	0.0541198	-0.598202	0.000186534	-0.12512	0.480774	-0.516686	0.00175662	0.111974	0.528381	0.776292	6.83937e-08	0.244114	0.164126	-0.515511	0.00180712	0.223323	0.204232
ENSG00000184154	LRTOMT	220074	bisque4	-0.0805396	0.650698	-0.216813	0.218078	-0.0651201	0.714441	-0.269257	0.123586	-0.204122	0.246886	-0.162001	0.360005	-0.158205	0.371521	0.576258	0.000361561	-0.0461479	0.795512	-0.135602	0.444475	-0.263569	0.132029	-0.0276327	0.876721	-0.485748	0.00358782	0.343374	0.0467871	0.604368	0.00015353	-0.352897	0.0406438	-0.745327	4.26263e-07	0.180642	0.30661
ENSG00000248712	CCDC153	283152	bisque4	-0.187044	0.289494	-0.160395	0.364852	-0.240435	0.170776	-0.131109	0.459849	-0.0443384	0.803371	-0.0424223	0.811713	-0.235566	0.179869	0.191187	0.27875	0.0677393	0.703464	0.00814729	0.963525	-0.216175	0.219468	-0.0152861	0.931623	-0.316245	0.0684371	0.240724	0.170246	0.478612	0.00419187	0.0441407	0.804231	-0.409042	0.016304	-0.00119717	0.994639
ENSG00000113719	ERGIC1	57222	bisque4	-0.0667297	0.707688	-0.0160035	0.928421	-0.112993	0.52461	0.365237	0.0336688	0.0643975	0.717479	0.0247881	0.889329	-0.0220495	0.901493	-0.6858	7.59557e-06	0.265242	0.129503	0.170532	0.334918	0.216309	0.219176	0.449505	0.00765246	0.512599	0.00193786	-0.329382	0.0571401	-0.45709	0.00657375	0.482082	0.00388801	0.631063	6.29585e-05	-0.322164	0.0631484
ENSG00000144867	SRPRB	58477	bisque4	0.237801	0.175653	0.319218	0.0657385	0.680286	9.58976e-06	0.0553232	0.755984	-0.239902	0.171754	-0.109311	0.538294	0.501174	0.00253384	-0.0948845	0.593494	0.153034	0.387554	-0.602849	0.000161132	0.581175	0.000313011	0.105985	0.550801	0.684181	8.1379e-06	0.0903693	0.611263	-0.684056	8.18138e-06	-0.349425	0.0428035	0.192108	0.276396	-0.556366	0.000633515
ENSG00000178028	DMAP1	55929	bisque4	-0.0983671	0.579945	-0.21402	0.224212	-0.1781	0.313582	-0.00568027	0.974566	-0.0258354	0.884684	-0.16037	0.364926	-0.416741	0.0142141	0.152425	0.389466	0.260896	0.136141	0.030545	0.863843	-0.400499	0.0189178	0.0129986	0.941836	-0.356928	0.0382476	0.394295	0.0210273	0.685725	7.61998e-06	0.0949501	0.593238	-0.571666	0.000412854	-0.0542723	0.760483
ENSG00000103245	NARFL	64428	bisque4	-0.106674	0.5482	-0.391517	0.0220333	-0.164156	0.353565	-0.0484152	0.785694	-0.167215	0.344541	-0.0795594	0.654683	-0.294373	0.0910375	0.287297	0.0994563	0.30191	0.082683	-0.0393837	0.824983	-0.404105	0.0177749	0.0820594	0.644536	-0.318247	0.0666106	0.195344	0.268231	0.60393	0.000155689	-0.0361517	0.839151	-0.665901	1.72233e-05	0.0161924	0.927579
ENSG00000075399	VPS9D1	9605	bisque4	-0.0984095	0.579781	-0.447541	0.00795517	-0.433341	0.0104632	0.199758	0.257351	0.200414	0.255759	0.0479779	0.787585	-0.548774	0.000777604	-0.0774004	0.663497	0.349991	0.0424449	0.405759	0.0172704	-0.62921	6.71579e-05	-0.126162	0.477098	-0.367859	0.0323202	-0.0748512	0.67396	0.628782	6.81622e-05	0.448034	0.00787829	-0.315445	0.0691779	0.167768	0.342925
ENSG00000232324	AC008440.10	NA	bisque4	-0.178265	0.313127	-0.19568	0.267394	-0.474057	0.00462166	-0.0299918	0.866287	0.108079	0.54291	0.0531725	0.765199	-0.405017	0.0174952	0.18939	0.283376	-0.111207	0.531227	0.4345	0.0102361	-0.514702	0.00184264	-0.180728	0.306378	-0.576769	0.000356222	-0.0582098	0.743668	0.619302	9.41828e-05	0.180921	0.305852	-0.329039	0.0574149	0.537294	0.00105052
ENSG00000144815	NXPE3	91775	bisque4	0.285244	0.102006	0.0896326	0.614183	0.5148	0.00183832	-0.0403497	0.820759	-0.124774	0.482	0.0488918	0.783634	0.497883	0.00273264	-0.00660173	0.970441	-0.119822	0.499686	-0.341425	0.0481318	0.484313	0.00370283	0.250134	0.153649	0.491387	0.00316527	-0.189635	0.282743	-0.682927	8.58186e-06	-0.375453	0.0286611	0.303904	0.0805748	-0.120807	0.496144
ENSG00000204531	POU5F1	5460	bisque4	0.0306161	0.863529	-0.253443	0.148101	-0.301382	0.0832474	0.0525601	0.767829	0.224046	0.202733	-0.163862	0.354438	-0.565082	0.000497644	0.27209	0.119533	0.0914319	0.607061	0.362648	0.0350448	-0.683944	8.22017e-06	-0.199848	0.257133	-0.675026	1.19238e-05	0.186817	0.290089	0.849688	2.07681e-10	0.145419	0.41188	-0.585299	0.00027685	0.37774	0.0276283
ENSG00000125821	DTD1	92675	bisque4	0.062735	0.724486	0.370192	0.0311579	0.330273	0.0564307	-0.00893612	0.959996	-0.0740074	0.677436	-0.106435	0.549099	0.416229	0.0143458	-0.203289	0.248862	-0.210046	0.233137	-0.255056	0.14545	0.597014	0.000193578	0.226107	0.198501	0.464505	0.00564778	-0.0405852	0.81973	-0.66617	1.70405e-05	-0.177	0.316628	0.538219	0.00102579	-0.309612	0.0747686
ENSG00000165669	FAM204A	NA	bisque4	0.142934	0.419999	0.338702	0.0500622	0.306232	0.0781658	-0.224341	0.202124	0.0405246	0.819995	0.0945779	0.594694	0.489991	0.00326563	-0.101528	0.56777	-0.528945	0.00129886	-0.204575	0.245816	0.619955	9.21407e-05	0.0250701	0.888078	0.301237	0.0834038	-0.0122234	0.9453	-0.661294	2.06399e-05	-0.284475	0.102973	0.67437	1.22484e-05	-0.123234	0.487463
ENSG00000166471	TMEM41B	440026	bisque4	-0.151788	0.391476	-0.2593	0.13864	-0.567809	0.000460813	-0.0750599	0.673101	0.0886009	0.618283	-0.0494154	0.781372	-0.517636	0.00171667	0.331709	0.0553028	-0.0633361	0.72195	0.46243	0.0058949	-0.669983	1.46338e-05	-0.265389	0.129282	-0.795538	1.88398e-08	0.0232555	0.896134	0.862527	5.48313e-11	0.110502	0.533851	-0.561024	0.000557306	0.535561	0.00109832
ENSG00000235488	JARID2-AS1	NA	bisque4	-0.295949	0.0892394	-0.341064	0.0483841	-0.729004	1.01099e-06	0.0323264	0.855983	0.16421	0.353405	0.0654546	0.713036	-0.530407	0.00125198	-0.0110311	0.950629	-0.000852162	0.996184	0.581579	0.000309287	-0.574075	0.000385191	-0.00883276	0.960459	-0.584131	0.000286696	-0.0959443	0.589357	0.657108	2.42642e-05	0.421017	0.0131537	-0.162922	0.357245	0.374497	0.0291021
ENSG00000259865	RP11-488L18.10	NA	bisque4	-0.0528628	0.766529	-0.161663	0.361021	-0.307457	0.0769211	-0.374932	0.028901	0.0637399	0.720248	-0.0510416	0.774361	-0.24303	0.166065	0.625511	7.62973e-05	-0.378823	0.02715	0.199285	0.258503	-0.427056	0.0117704	-0.354976	0.039393	-0.827904	1.53425e-09	0.108878	0.539915	0.742117	5.07716e-07	-0.282456	0.105547	-0.579305	0.000330741	0.542449	0.000919001
ENSG00000198467	TPM2	7169	bisque4	0.30801	0.0763643	0.511152	0.00200584	0.180891	0.305934	0.195022	0.269038	0.33541	0.0524773	-0.374772	0.0289746	-0.459629	0.00624307	0.177764	0.314512	0.158388	0.370962	0.166855	0.345594	-0.503327	0.00241065	-0.279089	0.109947	-0.425042	0.0122176	0.46499	0.00559138	0.598746	0.000183383	0.0158345	0.929176	-0.50087	0.00255165	0.127654	0.47186
ENSG00000278206	RP1-20N2.8	NA	bisque4	-0.0115251	0.94842	-0.264934	0.129966	-0.218635	0.21414	-0.102321	0.564731	0.0743676	0.675952	-0.158154	0.371676	-0.367543	0.0324804	0.323949	0.061618	0.00186426	0.991651	0.155554	0.379691	-0.43822	0.00953508	0.0837711	0.637623	-0.568821	0.000447775	0.280419	0.108193	0.689083	6.59541e-06	-0.0459172	0.796513	-0.527218	0.00135621	0.222563	0.205816
ENSG00000064012	CASP8	841	bisque4	-0.081982	0.644849	-0.132229	0.455992	-0.39842	0.0196045	-0.120645	0.496725	0.202622	0.25045	-0.147011	0.406725	-0.484231	0.00370948	0.34084	0.0485415	-0.144038	0.416382	0.375016	0.028862	-0.594774	0.000207509	-0.204884	0.245088	-0.793408	2.18737e-08	0.241528	0.168779	0.845291	3.18641e-10	0.0645447	0.71686	-0.504031	0.00237153	0.458862	0.00634142
ENSG00000171163	ZNF692	55657	bisque4	-0.120777	0.496252	-0.315448	0.0691751	-0.142614	0.421052	-0.37797	0.0275263	-0.164224	0.353361	0.045447	0.798554	-0.088571	0.618402	0.688123	6.87474e-06	-0.0889194	0.617016	-0.101944	0.566175	-0.326303	0.0596454	-0.204775	0.245345	-0.530821	0.00123896	0.0624118	0.725851	0.589319	0.000245239	-0.366369	0.0330811	-0.751432	3.03478e-07	0.34003	0.0491127
ENSG00000092068	SLC7A8	23428	bisque4	0.0751928	0.672554	0.0761503	0.66862	0.376822	0.028039	-0.0713122	0.688585	-0.153394	0.386423	0.0575085	0.746654	0.416225	0.0143467	-0.109075	0.539177	-0.000674711	0.996978	-0.38483	0.0246186	0.490697	0.00321456	0.176704	0.317452	0.498537	0.00269207	-0.0553008	0.75608	-0.56639	0.00047967	-0.20568	0.243219	0.281477	0.106813	-0.317263	0.0675033
ENSG00000173226	IQCB1	9657	bisque4	-0.089163	0.616048	-0.238283	0.174753	-0.276984	0.112767	-0.349116	0.0429999	-0.0530701	0.765639	0.0893762	0.615201	-0.149413	0.399016	0.639598	4.65117e-05	-0.270452	0.121865	0.119522	0.500768	-0.396071	0.0204046	-0.394332	0.0210142	-0.685163	7.80508e-06	-0.0409085	0.818318	0.625312	7.68199e-05	-0.296174	0.0889846	-0.618805	9.57662e-05	0.543485	0.000894395
ENSG00000179826	MRGPRX3	117195	bisque4	0.271664	0.120136	0.189841	0.282212	-0.113924	0.521177	0.299838	0.0849179	0.363534	0.0345687	-0.324028	0.0615511	-0.586845	0.000264288	-0.0416904	0.814905	0.109932	0.535973	0.477126	0.00432813	-0.563802	0.000515822	-0.163671	0.355009	-0.454399	0.00694052	-0.00515104	0.976935	0.604362	0.00015356	0.211078	0.230796	-0.271592	0.120239	0.295399	0.0898635
ENSG00000135617	PRADC1	84279	bisque4	0.0126854	0.943236	0.391695	0.0219675	0.432149	0.0107012	0.128387	0.469299	-0.121598	0.493304	-0.123723	0.485727	0.362137	0.0353216	-0.419104	0.0136196	0.170745	0.334304	-0.441494	0.00895232	0.619203	9.4495e-05	0.303001	0.0815241	0.722199	1.42345e-06	0.218045	0.21541	-0.687666	7.01154e-06	0.0351627	0.843496	0.487199	0.00347465	-0.702768	3.58841e-06
ENSG00000245849	RAD51-AS1	100505648	bisque4	-0.0429273	0.809512	-0.225769	0.199192	-0.254309	0.146673	-0.231646	0.187435	0.0258382	0.884671	-0.123218	0.487522	-0.360012	0.0364927	0.578155	0.000342088	-0.134369	0.448666	0.178067	0.313673	-0.550576	0.000741011	-0.243041	0.166046	-0.755682	2.38189e-07	0.161064	0.362827	0.843552	3.76019e-10	-0.190104	0.281532	-0.744304	4.50798e-07	0.466937	0.00536955
ENSG00000145012	LPP	4026	bisque4	0.341349	0.0481845	0.135949	0.4433	-0.18904	0.284285	0.21417	0.223878	0.502149	0.00247737	-0.275076	0.11537	-0.583861	0.000289011	0.152683	0.388657	-0.218291	0.214881	0.689223	6.55565e-06	-0.654456	2.68492e-05	-0.326124	0.0597937	-0.722137	1.42781e-06	-0.18198	0.302982	0.630337	6.45754e-05	0.0905203	0.610665	-0.253419	0.148141	0.743343	4.75037e-07
ENSG00000236287	ZBED5	58486	bisque4	-0.0352277	0.84321	-0.128047	0.470486	-0.348906	0.0431336	-0.196125	0.266284	0.186131	0.291896	-0.0831588	0.640093	-0.435827	0.00998112	0.47395	0.00463221	-0.174435	0.323804	0.317445	0.0673374	-0.607218	0.000140126	-0.367166	0.0326724	-0.822923	2.33138e-09	0.135336	0.44538	0.866333	3.60037e-11	-0.0476568	0.788975	-0.606654	0.000142689	0.505844	0.00227328
ENSG00000043514	TRIT1	54802	bisque4	-0.272666	0.118721	0.0103843	0.95352	0.0907998	0.609559	-0.569832	0.000435075	-0.446351	0.00814357	-0.000653318	0.997074	0.37948	0.0268632	0.657252	2.41306e-05	-0.296627	0.0884739	-0.513233	0.00190873	0.233783	0.183283	-0.156596	0.376468	-0.187951	0.287118	0.274624	0.115993	0.104814	0.555234	-0.602717	0.000161811	-0.479688	0.0040955	0.00757162	0.966101
ENSG00000100836	PABPN1	8106	bisque4	-0.0457976	0.797032	-0.102018	0.565892	-0.315326	0.0692885	0.10928	0.53841	0.249194	0.155253	-0.289634	0.0966124	-0.548422	0.000784933	0.00652233	0.970797	0.195816	0.267055	0.312799	0.0716719	-0.515652	0.00180103	-0.058767	0.741297	-0.494734	0.00293547	0.281573	0.106688	0.722045	1.43434e-06	0.28291	0.104965	-0.351118	0.0417391	0.0324345	0.855506
ENSG00000214253	FIS1	51024	bisque4	0.110606	0.533462	0.357423	0.0379614	0.411092	0.0157241	0.175274	0.321448	0.101035	0.569661	-0.0360059	0.839791	0.316392	0.0683018	-0.597476	0.000190811	0.109643	0.537053	-0.286005	0.101054	0.607258	0.000139944	0.326083	0.0598271	0.744045	4.57216e-07	0.0733083	0.680322	-0.759235	1.93783e-07	0.167404	0.343988	0.77278	8.53686e-08	-0.648847	3.31528e-05
ENSG00000279529	CTD-3222D19.8	NA	bisque4	0.0424175	0.811734	-0.171617	0.331805	-0.191878	0.276983	0.180508	0.306976	0.123022	0.48822	-0.297482	0.0875167	-0.477509	0.00429259	0.0679356	0.702644	0.152623	0.388845	0.273695	0.117282	-0.451036	0.00742334	0.236109	0.178838	-0.400862	0.0188001	0.11791	0.506606	0.58775	0.000257175	0.142646	0.420947	-0.39315	0.0214374	0.147414	0.405423
ENSG00000176401	EID2B	126272	bisque4	0.178518	0.312429	0.26108	0.135854	0.579091	0.000332828	-0.207407	0.239197	-0.175496	0.320823	0.12244	0.490294	0.496266	0.00283524	0.0595391	0.738017	0.0126825	0.943249	-0.612456	0.000118192	0.528037	0.00132873	-0.0341179	0.848092	0.495054	0.00291429	0.114349	0.519615	-0.533244	0.00116521	-0.384728	0.0246602	0.085579	0.630355	-0.417439	0.0140362
ENSG00000135473	PAN2	9924	bisque4	-0.0255328	0.886026	-0.14382	0.417096	-0.148631	0.401515	-0.175042	0.322098	0.0134594	0.939778	-0.231018	0.188666	-0.342069	0.0476843	0.542311	0.000922328	-0.0176122	0.921248	0.0816886	0.646037	-0.49356	0.00301436	-0.143586	0.417861	-0.659107	2.24673e-05	0.247585	0.158025	0.797107	1.68598e-08	-0.20114	0.254006	-0.768792	1.09288e-07	0.32765	0.058539
ENSG00000232838	PET117	100303755	bisque4	0.250186	0.153561	0.244493	0.163452	0.483635	0.00375826	-0.168834	0.339822	-0.0186751	0.916511	0.0174811	0.921832	0.458123	0.00643751	0.0123376	0.944789	-0.331057	0.0558126	-0.330605	0.0561683	0.53917	0.00100085	0.237021	0.177116	0.338049	0.050534	0.111594	0.529788	-0.575652	0.00036799	-0.370749	0.0308855	0.38765	0.0234997	-0.173495	0.326459
ENSG00000183978	COA3	28958	bisque4	-0.447954	0.00789079	-0.154785	0.38208	0.183037	0.300133	-0.608053	0.000136398	-0.759014	1.96313e-07	0.525189	0.00142644	0.936124	4.45842e-16	0.198699	0.259934	-0.204671	0.245588	-0.866752	3.43467e-11	0.900847	3.91265e-13	0.282198	0.10588	0.659707	2.19522e-05	0.0507392	0.775663	-0.799396	1.43126e-08	-0.484999	0.00364742	0.238142	0.175016	-0.480579	0.00401716
ENSG00000183779	ZNF703	80139	bisque4	0.184558	0.296066	0.136656	0.440911	0.520272	0.00161002	0.0237644	0.893873	-0.257356	0.14173	0.258804	0.139424	0.480037	0.00406461	0.0360123	0.839763	0.131295	0.459207	-0.45169	0.00732725	0.35871	0.0372252	-0.159889	0.366387	0.566542	0.000477615	-0.102025	0.565865	-0.60676	0.000142203	-0.299213	0.0856014	0.0507048	0.775811	-0.217852	0.215827
ENSG00000119616	FCF1	51077	bisque4	-0.366012	0.0332656	-0.151854	0.391268	0.19736	0.263225	-0.611	0.000123955	-0.660761	2.10725e-05	0.456268	0.00668396	0.934792	6.14292e-16	0.278299	0.111	-0.367867	0.0323162	-0.757873	2.09824e-07	0.853889	1.36206e-10	0.204426	0.246167	0.529827	0.0012704	0.0103419	0.953709	-0.785734	3.69318e-08	-0.567345	0.000466904	0.274104	0.116713	-0.291589	0.0942824
ENSG00000272086	CTD-2186M15.3	NA	bisque4	0.379409	0.0268941	0.060483	0.734012	0.379713	0.0267622	0.322979	0.0624457	0.248304	0.15678	-0.117885	0.506695	0.117222	0.509106	-0.522157	0.00153733	0.153981	0.384587	-0.0202908	0.909317	0.307454	0.0769245	0.340612	0.0487018	0.527098	0.0013603	-0.326521	0.0594651	-0.568775	0.000448359	0.147428	0.40538	0.609292	0.00013104	-0.315607	0.0690269
ENSG00000214456	PLIN5	440503	bisque4	-0.149469	0.398837	-0.233368	0.184084	-0.340117	0.0490515	-0.113508	0.522708	0.0671653	0.705865	-0.0870045	0.624649	-0.314815	0.0697653	0.154037	0.384414	-0.0394803	0.82456	0.191687	0.27747	-0.299965	0.0847799	0.0677785	0.703301	-0.457565	0.00651073	0.324123	0.0614706	0.544483	0.000871231	0.0997566	0.574578	-0.288315	0.0982104	0.15441	0.383247
ENSG00000267796	LIN37	55957	bisque4	-0.14778	0.404247	-0.195994	0.26661	-0.0445065	0.80264	-0.252896	0.149008	-0.0831779	0.640016	-0.144146	0.416029	-0.113607	0.522346	0.441141	0.00901366	-0.00180814	0.991903	-0.112863	0.525089	-0.238478	0.17439	-0.189733	0.28249	-0.363988	0.0343268	0.216659	0.218413	0.500883	0.00255088	-0.223156	0.204581	-0.540228	0.00097378	0.13431	0.448867
ENSG00000168010	ATG16L2	89849	bisque4	-0.122231	0.491041	-0.295814	0.0893917	-0.225111	0.200539	-0.294404	0.0910023	-0.0919209	0.605132	-0.0316808	0.85883	-0.257463	0.141558	0.635117	5.45867e-05	-0.067311	0.705255	0.0356245	0.841466	-0.453418	0.00707846	-0.196198	0.266102	-0.634143	5.65015e-05	0.118071	0.506022	0.7465	3.99617e-07	-0.25113	0.151963	-0.787618	3.25401e-08	0.391794	0.0219314
ENSG00000169026	MFSD7	84179	bisque4	-0.202972	0.249615	-0.402201	0.0183711	-0.277812	0.111652	0.126328	0.476515	-0.058163	0.743867	0.178748	0.311797	-0.405778	0.0172648	0.0226157	0.898977	0.545503	0.000848135	0.0673193	0.705221	-0.516578	0.00176123	-0.172149	0.330284	-0.158287	0.37127	0.152233	0.390073	0.55769	0.000610967	0.348037	0.0436919	-0.565352	0.000493885	-0.0449987	0.800501
ENSG00000239569	KMT2E-AS1	NA	bisque4	-0.0141452	0.936716	-0.37765	0.0276685	-0.460156	0.0061762	0.0414093	0.816131	0.205355	0.243981	0.00583416	0.973877	-0.452968	0.00714256	0.0402279	0.821291	-0.041108	0.817446	0.481082	0.00397352	-0.48633	0.00354206	0.088748	0.617698	-0.517644	0.00171635	-0.17439	0.323932	0.556287	0.000634885	0.215023	0.221995	-0.143999	0.416508	0.352635	0.0408037
ENSG00000143870	PDIA6	10130	bisque4	0.0707241	0.691027	0.0810888	0.648468	0.208189	0.237391	0.198682	0.259977	0.0636262	0.720728	0.281014	0.107415	0.244828	0.162857	-0.511809	0.00197472	0.195556	0.267702	-0.103182	0.561445	0.332192	0.0549275	0.246812	0.159369	0.643547	4.03062e-05	-0.154285	0.383638	-0.642915	4.1246e-05	0.271968	0.119705	0.602383	0.000163535	-0.308603	0.0757711
ENSG00000180089	TMEM86B	255043	bisque4	-0.176279	0.318637	-0.0741667	0.67678	-0.17547	0.320897	0.220754	0.209622	0.00259748	0.988368	-0.244619	0.163228	-0.44661	0.00810221	-0.0475372	0.789492	0.512589	0.00193833	0.0600664	0.735779	-0.4265	0.0118925	-0.0146692	0.934376	-0.168056	0.342084	0.26947	0.123278	0.571101	0.000419583	0.324101	0.0614892	-0.499885	0.00261012	-0.171435	0.332325
ENSG00000260257	RP5-1085F17.3	NA	bisque4	-0.306409	0.0779849	-0.156829	0.375749	-0.45014	0.00755675	-0.318786	0.0661257	0.0105983	0.952563	0.0325171	0.855142	-0.205486	0.243673	0.342037	0.0477061	-0.279216	0.109779	0.198407	0.260651	-0.310833	0.0735705	-0.297638	0.0873425	-0.61005	0.00012785	0.0910083	0.608735	0.571272	0.000417536	-0.0032333	0.985521	-0.320461	0.0646362	0.367673	0.0324146
ENSG00000032389	TSSC1	7260	bisque4	-0.332604	0.0546086	-0.0404836	0.820174	0.168662	0.340321	-0.409082	0.0162926	-0.474894	0.00453993	0.297896	0.0870553	0.693127	5.52874e-06	-0.0264074	0.882148	-0.205977	0.242524	-0.625575	7.61317e-05	0.798781	1.496e-08	0.404512	0.0176496	0.592534	0.000222322	-0.0291497	0.870009	-0.696874	4.68295e-06	-0.280653	0.107886	0.433241	0.010483	-0.464373	0.00566326
ENSG00000188130	MAPK12	6300	bisque4	-0.199031	0.259122	-0.210304	0.232552	-0.379661	0.0267847	-0.0670034	0.706542	-0.0783637	0.659559	-0.0427785	0.810161	-0.322942	0.0624775	0.308434	0.0759392	-0.0297388	0.867405	0.230231	0.190218	-0.421142	0.0131239	-0.0633827	0.721754	-0.508592	0.00213118	0.0102806	0.953984	0.609333	0.000130862	-0.0034336	0.984624	-0.498461	0.00269682	0.345932	0.045068
ENSG00000242294	STAG3L5P	101735302	bisque4	0.0659239	0.711066	-0.209691	0.233946	-0.247205	0.158684	-0.0308903	0.862318	0.236041	0.178967	-0.273462	0.117606	-0.514098	0.00186956	0.402076	0.0184109	-0.111896	0.52867	0.381173	0.0261353	-0.627693	7.07788e-05	-0.27586	0.114296	-0.7698	1.02722e-07	0.0789484	0.657173	0.849976	2.01833e-10	-0.0576746	0.745947	-0.582376	0.000302069	0.492138	0.00311244
ENSG00000204264	PSMB8	5696	bisque4	-0.476138	0.00442075	-0.128106	0.470281	-0.0239606	0.893002	-0.400737	0.0188407	-0.530527	0.00124819	0.632625	5.96063e-05	0.740374	5.57687e-07	-0.169302	0.338466	-0.114577	0.518776	-0.568385	0.000453349	0.77219	8.85733e-08	0.215442	0.221075	0.693746	5.38006e-06	-0.0561527	0.752438	-0.805314	9.27947e-09	-0.0710622	0.689623	0.549326	0.000766235	-0.49707	0.00278385
ENSG00000172731	LRRC20	55222	bisque4	0.0849294	0.632963	0.102525	0.563952	0.355903	0.0388455	-0.152928	0.387886	-0.261225	0.135629	0.235039	0.180874	0.452405	0.00722342	0.11952	0.500777	-0.000424243	0.9981	-0.42558	0.0120966	0.379534	0.0268396	0.0415888	0.815348	0.409003	0.0163152	-0.199458	0.258082	-0.486072	0.0035623	-0.317582	0.0672129	0.0422828	0.812321	-0.153175	0.387112
ENSG00000251323	RP11-452H21.4	101928865	bisque4	-0.0776711	0.662389	-0.220543	0.21007	-0.344943	0.0457265	-0.15682	0.375775	0.0537919	0.762542	-0.215958	0.219943	-0.399332	0.0193009	0.3889	0.023017	-0.173492	0.326468	0.279761	0.109059	-0.473611	0.00466573	-0.0243465	0.891289	-0.715987	1.92874e-06	0.181666	0.303833	0.757921	2.09239e-07	-0.089132	0.616171	-0.504884	0.00232486	0.39831	0.0196412
ENSG00000196684	HSH2D	84941	bisque4	-0.287869	0.0987542	-0.263838	0.13162	-0.446344	0.00814473	-0.326065	0.0598423	-0.061677	0.728956	0.492562	0.00308287	-0.180081	0.308142	0.400273	0.0189917	-0.093298	0.599712	0.132759	0.454171	-0.428884	0.0113767	-0.438569	0.00947141	-0.500931	0.00254807	0.0569964	0.748838	0.567533	0.000464429	0.0435259	0.806906	-0.493079	0.00304724	0.409729	0.0161076
ENSG00000146731	CCT6A	908	bisque4	0.119414	0.50116	0.354932	0.0394194	0.4182	0.0138444	0.0493883	0.78149	-0.0451349	0.799909	-0.181865	0.303293	0.477763	0.0042692	-0.315809	0.0688396	-0.177304	0.315784	-0.28994	0.0962448	0.684881	7.89911e-06	0.288155	0.098405	0.588645	0.000250305	-0.0113761	0.949086	-0.799531	1.41744e-08	-0.151048	0.393816	0.676259	1.13346e-05	-0.413664	0.0150206
ENSG00000112425	EPM2A	7957	bisque4	0.145916	0.410266	0.221431	0.208193	0.615581	0.000106624	-0.327462	0.0586918	-0.345313	0.0454792	0.136647	0.44094	0.620949	8.91046e-05	0.362144	0.0353177	-0.223852	0.203135	-0.655551	2.57527e-05	0.557159	0.000619925	-0.0083145	0.962777	0.375487	0.0286458	0.156211	0.377655	-0.529507	0.00128065	-0.68079	9.38962e-06	-0.0568408	0.749501	-0.175598	0.320538
ENSG00000120662	MTRF1	9617	bisque4	-0.0350024	0.844201	-0.210001	0.23324	-0.305066	0.0793654	-0.263354	0.132356	0.126126	0.477227	-0.0862739	0.627571	-0.35835	0.0374299	0.530433	0.00125116	-0.230992	0.188718	0.245116	0.162348	-0.51721	0.00173451	-0.258864	0.139329	-0.779014	5.74392e-08	0.190592	0.280276	0.796387	1.77437e-08	-0.140383	0.428429	-0.583734	0.00029011	0.481428	0.00394377
ENSG00000070404	FSTL3	10272	bisque4	-0.112506	0.52641	-0.321585	0.0636507	-0.0180526	0.919285	-0.11591	0.513892	-0.261633	0.134998	-0.0934394	0.599157	-0.0867581	0.625634	0.189989	0.281829	0.276246	0.113769	-0.252836	0.149108	-0.0921807	0.604108	0.22555	0.199639	-0.0499113	0.779232	0.203001	0.249545	0.326548	0.0594429	-0.0890996	0.6163	-0.486101	0.00355997	-0.226956	0.196775
ENSG00000126249	PDCD2L	84306	bisque4	0.289473	0.0968062	0.192992	0.274149	0.548805	0.00077697	-0.0887919	0.617523	-0.1685	0.340792	0.0238588	0.893454	0.447712	0.00792848	0.203288	0.248862	-0.101537	0.567736	-0.422971	0.0126921	0.367308	0.0325999	-0.11219	0.527582	0.342408	0.0474497	-0.0185832	0.916921	-0.466357	0.00543485	-0.483039	0.00380761	0.00787314	0.964752	-0.113107	0.524188
ENSG00000224796	RPL32P1	NA	bisque4	-0.0669488	0.706771	0.000470338	0.997894	-0.468705	0.00517477	0.155825	0.37885	0.272438	0.119043	-0.1241	0.484386	-0.552645	0.000700882	0.0553873	0.75571	0.00132105	0.994084	0.556843	0.000625299	-0.604782	0.000151515	-0.217699	0.216157	-0.604213	0.000154292	-0.0184671	0.917438	0.678612	1.02831e-05	0.312838	0.0716345	-0.262021	0.134399	0.378564	0.0272639
ENSG00000279162	CTD-3126B10.2	NA	bisque4	0.391813	0.0219244	-0.0362914	0.838537	-0.154565	0.382766	0.36477	0.0339135	0.423688	0.012526	-0.335029	0.0527629	-0.691399	5.9637e-06	0.136945	0.439936	0.0420919	0.813153	0.662141	1.99691e-05	-0.787494	3.28141e-08	-0.273305	0.117826	-0.660838	2.1009e-05	-0.125157	0.480645	0.726627	1.14063e-06	0.142049	0.422913	-0.443563	0.00859978	0.641807	4.29414e-05
ENSG00000251136	RP11-37B2.1	101929709	bisque4	-0.12243	0.490331	-0.292437	0.0932852	-0.651242	3.03134e-05	0.0951901	0.5923	0.385582	0.0243161	0.0154328	0.930968	-0.628385	6.91052e-05	0.0407935	0.81882	-0.0570124	0.748769	0.720338	1.56034e-06	-0.72876	1.02362e-06	-0.202652	0.250379	-0.734636	7.55776e-07	-0.152514	0.389187	0.766207	1.27941e-07	0.427346	0.0117072	-0.215238	0.221523	0.572675	0.000401055
ENSG00000223401	RP11-211G3.2	NA	bisque4	0.0728715	0.682127	-0.352735	0.0407422	-0.391293	0.0221163	-0.0222162	0.900752	0.190056	0.281656	-0.0800733	0.652592	-0.529594	0.00127784	0.338892	0.049925	-0.0950458	0.592864	0.476987	0.00434102	-0.674814	1.20277e-05	-0.0643077	0.717858	-0.753943	2.63156e-07	-0.0508848	0.775036	0.818135	3.4438e-09	0.0260162	0.883882	-0.506046	0.00226258	0.576264	0.000361506
ENSG00000127481	UBR4	23352	bisque4	0.372947	0.0298289	0.0296535	0.867781	0.0817691	0.645711	0.315582	0.0690499	0.302796	0.0817406	-0.106318	0.549543	-0.333026	0.054284	0.0636237	0.720738	0.0548919	0.757829	0.412345	0.0153779	-0.462056	0.00594041	-0.161249	0.362271	-0.24681	0.159372	-0.389801	0.0226745	0.257253	0.141894	0.0474981	0.789662	-0.222494	0.20596	0.555988	0.000640088
ENSG00000163297	ANTXR2	118429	bisque4	-0.324768	0.0609257	0.0242269	0.89182	-0.0155701	0.930355	-0.380081	0.0266028	-0.3985	0.0195777	0.291422	0.0944792	0.633389	5.80246e-05	0.0934791	0.599001	-0.33736	0.0510354	-0.371987	0.0302865	0.606644	0.000142735	0.147556	0.404968	0.331347	0.0555851	-0.221245	0.208585	-0.577676	0.000346919	-0.277809	0.111656	0.335848	0.0521507	-0.105966	0.550872
ENSG00000172197	MBOAT1	154141	bisque4	0.0129213	0.942182	-0.206528	0.241238	-0.224376	0.202052	-0.0413419	0.816426	0.145017	0.413188	-0.20575	0.243054	-0.501176	0.00253371	0.421155	0.0131208	0.0518679	0.770805	0.258252	0.1403	-0.642465	4.19272e-05	-0.229471	0.191728	-0.695208	5.04332e-06	0.181205	0.30508	0.880207	6.91723e-12	-0.0229623	0.897436	-0.724972	1.23966e-06	0.377743	0.0276272
ENSG00000105397	TYK2	7297	bisque4	-0.0856932	0.629898	-0.249327	0.155025	-0.188386	0.285985	0.0444989	0.802673	0.00545272	0.975584	-0.147376	0.405548	-0.463443	0.00577309	0.237236	0.176712	0.361438	0.0357036	0.0835061	0.638692	-0.559794	0.000576598	-0.0680412	0.702203	-0.422267	0.0128567	0.294719	0.0906402	0.763185	1.53426e-07	0.11607	0.513305	-0.716469	1.8843e-06	0.0761876	0.668467
ENSG00000147576	ADHFE1	137872	bisque4	-0.0297225	0.867477	-0.248509	0.156428	-0.283639	0.104034	-0.12032	0.497895	0.0782799	0.659901	-0.229885	0.190904	-0.366989	0.0327628	0.404908	0.0175284	-0.0533356	0.764499	0.226745	0.197203	-0.483734	0.00375013	-0.115758	0.514445	-0.663191	1.91653e-05	0.0892873	0.615554	0.733263	8.11871e-07	-0.116798	0.510648	-0.556645	0.000628705	0.326866	0.0591808
ENSG00000103194	USP10	9100	bisque4	0.12762	0.47198	0.352858	0.0406676	0.388029	0.0233523	0.144668	0.414325	0.0199776	0.910711	-0.242843	0.166401	0.320916	0.0642361	-0.292176	0.0935907	-0.0238288	0.893588	-0.210301	0.232557	0.492288	0.00310197	0.164573	0.352326	0.479885	0.00407806	-0.12505	0.481023	-0.623733	8.10784e-05	-0.101104	0.569395	0.495553	0.00288154	-0.320928	0.0642252
ENSG00000178467	P4HTM	54681	bisque4	-0.0973264	0.583979	0.0143752	0.935689	0.0687843	0.699101	-0.00222447	0.990038	-0.10726	0.54599	-0.426436	0.0119064	-0.18258	0.301363	0.0981982	0.580599	0.234518	0.181869	-0.210818	0.231387	-0.0498002	0.779712	0.111458	0.530292	-0.0891564	0.616074	0.426387	0.0119174	0.363672	0.0344951	-0.0529373	0.766209	-0.393777	0.021212	-0.318897	0.0660257
ENSG00000114054	PCCB	5096	bisque4	-0.0208657	0.906758	0.369642	0.0314286	0.453106	0.00712286	-0.0741278	0.67694	-0.282791	0.105117	0.17087	0.333946	0.641151	4.3975e-05	-0.212732	0.227079	-0.0641994	0.718313	-0.521843	0.00154922	0.743415	4.73196e-07	0.129786	0.46443	0.75821	2.0574e-07	-0.03274	0.85416	-0.892552	1.33072e-12	-0.211077	0.2308	0.519024	0.00165975	-0.473888	0.00463827
ENSG00000130270	ATP8B3	148229	bisque4	-0.320166	0.0648963	-0.334307	0.0533072	-0.459778	0.00622412	-0.170071	0.336243	-0.13598	0.443195	-0.00690363	0.96909	-0.326083	0.0598271	0.335155	0.0526684	0.0672554	0.705488	0.13793	0.436624	-0.424951	0.0122379	-0.126044	0.477513	-0.521931	0.0015459	0.118052	0.506088	0.673393	1.27466e-05	0.0546619	0.758814	-0.586254	0.000269033	0.242455	0.167102
ENSG00000267106	ZNF561-AS1	284385	bisque4	0.00942587	0.957806	0.352393	0.0409512	0.253501	0.148005	0.0675406	0.704295	0.117377	0.508541	-0.149488	0.398777	0.305838	0.0785698	-0.378574	0.0272592	-0.117644	0.50757	-0.131195	0.459553	0.529189	0.00129093	0.0992498	0.576533	0.466837	0.00538074	-0.121268	0.494488	-0.636376	5.21991e-05	0.0409699	0.81805	0.680641	9.44843e-06	-0.323762	0.061777
ENSG00000142765	SYTL1	84958	bisque4	-0.258579	0.13978	-0.104258	0.557347	-0.0816001	0.646395	-0.0659437	0.710983	-0.271907	0.119792	0.0914643	0.606933	-0.104167	0.557694	0.116941	0.510129	0.388137	0.0233107	-0.272799	0.118534	-0.150722	0.394849	-0.170194	0.33589	0.00432478	0.980634	0.365975	0.0332846	0.333669	0.0537914	0.0958069	0.589892	-0.504023	0.00237197	-0.257631	0.141289
ENSG00000177535	OR2B11	127623	bisque4	-0.0736865	0.678761	-0.16316	0.356533	-0.581102	0.000313684	0.132675	0.45446	0.364689	0.0339561	0.102746	0.563109	-0.593357	0.000216775	-0.0225767	0.89915	0.00142942	0.993599	0.662384	1.97804e-05	-0.682091	8.8899e-06	-0.171686	0.331607	-0.61148	0.00012203	-0.166666	0.346151	0.670143	1.45395e-05	0.444788	0.00839673	-0.174166	0.324563	0.503584	0.00239627
ENSG00000137841	PLCB2	5330	bisque4	-0.066103	0.710315	-0.234326	0.182238	-0.262668	0.133404	0.0385994	0.828416	0.133747	0.450791	-0.13983	0.430268	-0.524111	0.00146505	0.242353	0.167285	0.245297	0.162028	0.223264	0.204356	-0.602884	0.000160954	-0.0541507	0.761004	-0.51989	0.00162511	0.229281	0.192106	0.799835	1.38665e-08	0.151302	0.393012	-0.627523	7.1197e-05	0.200847	0.254712
ENSG00000279583	RP11-368N21.5	NA	bisque4	-0.142854	0.420265	-0.219132	0.213075	-0.494941	0.00292176	0.247319	0.158487	0.205692	0.243189	0.0070888	0.968262	-0.571495	0.000414876	-0.049294	0.781897	0.264032	0.131327	0.497711	0.00274339	-0.637603	4.99637e-05	-0.0324716	0.855342	-0.426228	0.0119524	-0.103896	0.558723	0.613202	0.000115331	0.46595	0.00548103	-0.296753	0.0883319	0.287662	0.0990083
ENSG00000100258	LMF2	91289	bisque4	-0.281628	0.106618	-0.262199	0.134125	-0.115671	0.514763	0.0510345	0.774391	-0.270072	0.12241	0.0624747	0.725585	-0.184168	0.297107	-0.0135391	0.939422	0.621839	8.64636e-05	-0.253302	0.148334	-0.212717	0.227112	0.0538822	0.762155	0.100681	0.571021	0.295722	0.0894968	0.346473	0.0447111	0.218486	0.214461	-0.519862	0.00162623	-0.388506	0.023168
ENSG00000261971	MMP25-AS1	NA	bisque4	-0.0704719	0.692075	-0.377631	0.0276769	-0.309572	0.074808	0.0258291	0.884712	0.0242222	0.891841	-0.185774	0.29284	-0.442744	0.00873781	0.349673	0.0426458	0.122752	0.489183	0.274329	0.116402	-0.592822	0.000220366	0.0982827	0.580272	-0.579593	0.000327955	0.0968756	0.585731	0.739444	5.86138e-07	0.0273382	0.878025	-0.639907	4.5997e-05	0.386885	0.0237988
ENSG00000213928	IRF9	10379	bisque4	-0.0320022	0.857412	-0.242421	0.167162	-0.431851	0.0107613	0.00019904	0.999109	0.20574	0.243078	-0.040903	0.818342	-0.60333	0.000158689	0.338138	0.0504694	0.0372664	0.834259	0.455244	0.00682351	-0.772133	8.88884e-08	-0.301017	0.0836401	-0.783057	4.41195e-08	0.097777	0.582231	0.943403	6.78322e-17	0.143991	0.416536	-0.657925	2.35151e-05	0.515033	0.00182803
ENSG00000077150	NFKB2	4791	bisque4	-0.0744368	0.675666	-0.0907441	0.60978	-0.404911	0.0175277	0.258223	0.140345	0.287848	0.0987803	-0.0894839	0.614774	-0.670685	1.42258e-05	-0.0666716	0.707932	0.344309	0.0461531	0.462756	0.00585541	-0.734936	7.43988e-07	-0.271577	0.12026	-0.485346	0.00361969	0.123882	0.485161	0.788958	2.97147e-08	0.51061	0.0020318	-0.428302	0.0115009	0.209008	0.235508
ENSG00000116731	PRDM2	7799	bisque4	0.535751	0.001093	0.0660646	0.710476	-0.0694188	0.696456	0.588861	0.000248673	0.738609	6.12857e-07	-0.447443	0.00797066	-0.905344	1.92444e-13	-0.110422	0.534146	0.270431	0.121894	0.776518	6.74141e-08	-0.912773	5.49681e-14	-0.279789	0.109022	-0.616013	0.000105109	-0.100722	0.570864	0.807836	7.68023e-09	0.399954	0.0190961	-0.36986	0.0313212	0.496486	0.00282108
ENSG00000099949	LZTR1	8216	bisque4	-0.140952	0.426542	-0.157408	0.373966	-0.0899682	0.612852	-0.0665097	0.70861	-0.185184	0.294403	-0.0923605	0.603399	-0.250975	0.152225	0.311895	0.07254	0.331893	0.0551595	-0.142723	0.420695	-0.346794	0.0445004	-0.0711443	0.689282	-0.265046	0.129797	0.400272	0.018992	0.586986	0.000263172	-0.0430524	0.808967	-0.718872	1.67659e-06	-0.0799528	0.653083
ENSG00000221990	EXOC3-AS1	NA	bisque4	-0.278214	0.111114	-0.131004	0.460213	0.0869132	0.625014	-0.209006	0.235513	-0.42491	0.0122471	0.378341	0.0273619	0.585599	0.000274376	-0.214172	0.223875	0.0182818	0.918263	-0.498557	0.00269085	0.653824	2.75005e-05	0.21417	0.223879	0.642952	4.11899e-05	-0.0805132	0.650805	-0.696924	4.67266e-06	-0.0735231	0.679435	0.442449	0.00878807	-0.542978	0.000906355
ENSG00000170846	AC093323.3	NA	bisque4	0.29619	0.0889664	0.164465	0.352648	0.728394	1.04286e-06	-0.114955	0.517389	-0.323019	0.0624115	-0.121238	0.494597	0.527374	0.00135094	0.213336	0.225732	0.0368447	0.836108	-0.671584	1.3718e-05	0.536964	0.00105949	0.229928	0.190819	0.502064	0.00248227	0.207597	0.238757	-0.53883	0.0010097	-0.603316	0.00015876	-0.0959166	0.589464	-0.388469	0.0231826
ENSG00000236977	ANKRD44-IT1	101927547	bisque4	0.379966	0.0266526	0.108063	0.54297	0.00452899	0.979719	0.130945	0.460417	0.416152	0.0143657	-0.170429	0.335212	-0.420794	0.0132075	0.149496	0.39875	-0.168369	0.341175	0.426633	0.0118631	-0.438032	0.00956939	-0.0711076	0.689434	-0.495822	0.00286395	-0.157944	0.37232	0.43978	0.0092535	-0.00174021	0.992207	-0.227593	0.195488	0.533643	0.00115344
ENSG00000262370	RP11-473M20.9	NA	bisque4	0.0148273	0.933671	-0.265277	0.12945	-0.155571	0.379638	-0.216868	0.217959	0.00634327	0.971598	-0.180297	0.307553	-0.315179	0.0694254	0.563659	0.000517894	-0.068135	0.701811	0.0842672	0.635626	-0.479652	0.00409871	-0.196441	0.2655	-0.666308	1.69474e-05	0.203378	0.248649	0.772883	8.48179e-08	-0.241614	0.168624	-0.730413	9.40641e-07	0.350914	0.0418658
ENSG00000236088	COX10-AS1	100506974	bisque4	-0.221255	0.208563	-0.0443745	0.803214	0.0813058	0.647588	-0.535044	0.00111294	-0.476152	0.00441944	0.0803486	0.651473	0.321452	0.0637672	0.612543	0.000117853	-0.260573	0.136643	-0.490562	0.00322429	0.19743	0.263054	0.0194119	0.913229	-0.156841	0.375711	0.374657	0.0290281	0.115785	0.514347	-0.575726	0.000367198	-0.466589	0.00540858	-0.00665069	0.970222
ENSG00000116990	MYCL	4610	bisque4	0.338168	0.0504478	0.0826382	0.642195	0.802705	1.12533e-08	-0.0283777	0.873423	-0.280042	0.108689	-0.00813403	0.963585	0.523352	0.00149273	0.136158	0.442593	0.157515	0.373637	-0.680988	9.312e-06	0.485105	0.00363898	0.143529	0.418049	0.615563	0.000106688	0.0468457	0.792487	-0.602771	0.000161531	-0.516084	0.00178233	-0.0801947	0.652099	-0.377638	0.0276736
ENSG00000167548	KMT2D	8085	bisque4	0.355779	0.0389186	-0.0881098	0.620238	-0.13459	0.447915	0.554643	0.000663958	0.428695	0.0114168	-0.215706	0.220495	-0.667391	1.62334e-05	-0.0667323	0.707678	0.298159	0.086763	0.675992	1.14599e-05	-0.785549	3.73916e-08	-0.189378	0.283409	-0.401225	0.0186831	-0.36721	0.03265	0.53442	0.00113082	0.336158	0.0519207	-0.346174	0.0449085	0.581131	0.000313414
ENSG00000204351	SKIV2L	6499	bisque4	-0.129946	0.463875	-0.207047	0.240031	-0.206912	0.240344	0.130811	0.46088	0.0615366	0.72955	-0.226127	0.198461	-0.457844	0.00647403	0.0973095	0.584045	0.38329	0.0252486	0.117555	0.507894	-0.471718	0.00485679	-0.076122	0.668736	-0.309329	0.0750488	0.228734	0.193196	0.656312	2.50154e-05	0.230471	0.189745	-0.551598	0.000720938	0.0106521	0.952323
ENSG00000132305	IMMT	10989	bisque4	-0.0982712	0.580316	0.310405	0.0739887	0.401885	0.0184716	-0.330208	0.0564827	-0.316095	0.068575	0.163123	0.356645	0.707843	2.83873e-06	0.0965029	0.58718	-0.282659	0.105287	-0.579724	0.000326689	0.724876	1.24567e-06	-0.00640872	0.971305	0.503197	0.00241795	0.0650651	0.714672	-0.729929	9.64274e-07	-0.437745	0.00962218	0.346794	0.0445004	-0.270934	0.121175
ENSG00000215021	PHB2	11331	bisque4	0.107807	0.543931	0.343812	0.046489	0.42704	0.0117739	0.279218	0.109776	0.0393145	0.825286	-0.174134	0.324653	0.302942	0.0815859	-0.640038	4.57807e-05	0.182344	0.301999	-0.281027	0.107399	0.625241	7.70065e-05	0.310297	0.0740942	0.798489	1.52766e-08	0.0219402	0.901979	-0.790767	2.62588e-08	0.164305	0.353122	0.751352	3.04847e-07	-0.704055	3.38292e-06
ENSG00000267892	CTD-2540F13.2	NA	bisque4	0.0572632	0.7477	-0.262002	0.134428	-0.179585	0.309497	-0.0199341	0.910904	0.051035	0.774389	-0.136472	0.441533	-0.365317	0.0336268	0.3585	0.0373444	0.0384816	0.828932	0.201318	0.253577	-0.535538	0.00109898	-0.34984	0.0425406	-0.556969	0.000623156	0.0552605	0.756252	0.682886	8.59694e-06	-0.0865768	0.626359	-0.604858	0.000151145	0.347887	0.0437888
ENSG00000152926	ZNF117	51351	bisque4	0.0318141	0.858242	-0.238829	0.173739	-0.240959	0.169817	-0.229553	0.191564	0.0697446	0.6951	-0.0784987	0.659008	-0.328333	0.0579842	0.59998	0.000176421	-0.260934	0.136081	0.244868	0.162786	-0.537419	0.00104716	-0.375338	0.0287142	-0.795473	1.89271e-08	0.0802821	0.651744	0.770487	9.8459e-08	-0.251225	0.151804	-0.664602	1.81305e-05	0.578783	0.000335854
ENSG00000166140	ZFYVE19	84936	bisque4	-0.179138	0.310724	-0.274378	0.116333	0.0502012	0.777982	-0.446136	0.00817795	-0.339324	0.0496155	0.177273	0.31587	0.157171	0.374695	0.660523	2.12679e-05	-0.0230015	0.897262	-0.402663	0.0182248	-0.0610365	0.731667	-0.0469933	0.791848	-0.215337	0.221304	0.170669	0.334521	0.308241	0.0761323	-0.443735	0.008571	-0.68814	6.86964e-06	0.120003	0.499035
ENSG00000175265	GOLGA8A	NA	bisque4	-0.105094	0.554172	-0.13311	0.452969	-0.415784	0.014461	-0.236096	0.178862	0.135286	0.445547	0.0142212	0.936376	-0.346011	0.045016	0.434533	0.0102295	-0.309878	0.074506	0.331862	0.0551838	-0.464367	0.00566389	-0.21442	0.223326	-0.776733	6.64971e-08	0.252053	0.150413	0.719958	1.58976e-06	-0.0586361	0.741854	-0.44012	0.00919312	0.515807	0.00179431
ENSG00000108021	FAM208B	54906	bisque4	0.427872	0.0115932	0.048657	0.784649	-0.175607	0.320512	0.328917	0.0575132	0.601558	0.000167859	-0.286836	0.100024	-0.732822	8.30683e-07	0.183762	0.298191	-0.0328278	0.853773	0.767837	1.15866e-07	-0.881119	6.16319e-12	-0.401579	0.0185694	-0.783804	4.19933e-08	-0.237609	0.176012	0.79208	2.39867e-08	0.170915	0.333816	-0.429184	0.0113131	0.791834	2.43974e-08
ENSG00000257103	LSM14A	26065	bisque4	0.0786898	0.658228	0.131164	0.459659	0.21989	0.211457	0.00474611	0.978747	-0.00753079	0.966284	0.0753776	0.671794	0.446357	0.00814266	-0.351656	0.0414054	-0.196127	0.266279	-0.147464	0.405263	0.573649	0.000389956	0.190871	0.279559	0.521646	0.00155675	-0.252247	0.150089	-0.776409	6.78868e-08	-0.0512912	0.773286	0.754065	2.61329e-07	-0.268027	0.125377
ENSG00000126775	ATG14	22863	bisque4	0.432289	0.0106729	-0.0373948	0.833695	-0.132327	0.455655	0.25658	0.142976	0.562905	0.00052891	-0.319728	0.0652847	-0.746464	4.00416e-07	0.223576	0.203707	-0.0457792	0.797112	0.665778	1.73073e-05	-0.837271	6.73012e-10	-0.296595	0.0885097	-0.809576	6.72993e-09	0.0161164	0.927918	0.864713	4.31304e-11	0.0966249	0.586706	-0.485125	0.00363738	0.658464	2.30319e-05
ENSG00000220785	MTMR9LP	NA	bisque4	0.0250404	0.88821	-0.31022	0.0741705	-0.367946	0.032276	0.233985	0.182894	0.307181	0.0772006	-0.0895464	0.614526	-0.566228	0.000481865	-0.0214441	0.904185	0.209023	0.235474	0.475185	0.00451182	-0.620628	9.00756e-05	-0.102674	0.563383	-0.476381	0.00439788	-0.0667442	0.707628	0.626104	7.47603e-05	0.373784	0.0294347	-0.321922	0.0633581	0.261884	0.13461
ENSG00000165819	METTL3	56339	bisque4	-0.0218524	0.90237	-0.182172	0.302464	-0.139004	0.433025	-0.240726	0.170242	0.00130022	0.994177	-0.0908852	0.609222	-0.27427	0.116483	0.492273	0.00310298	-0.0273263	0.878077	0.00334797	0.985007	-0.418437	0.0137854	-0.219407	0.212486	-0.598013	0.000187639	0.375014	0.0288632	0.72022	1.56942e-06	-0.195915	0.266807	-0.688069	6.89091e-06	0.21301	0.226459
ENSG00000179151	EDC3	80153	bisque4	-0.357588	0.0378662	-0.0948798	0.593513	0.224451	0.201897	-0.634645	5.55076e-05	-0.642231	4.22863e-05	0.296062	0.0891116	0.814726	4.51567e-09	0.448431	0.00781687	-0.341914	0.0477915	-0.760426	1.80692e-07	0.735327	7.28899e-07	0.225935	0.198853	0.371081	0.0307237	0.0365747	0.837294	-0.556488	0.000631412	-0.646127	3.66666e-05	0.0211101	0.905671	-0.202048	0.251823
ENSG00000100353	EIF3D	8664	bisque4	0.117578	0.507812	0.303867	0.0806136	0.402846	0.0181674	0.236719	0.177686	0.0129687	0.94197	-0.126161	0.477103	0.365018	0.0337831	-0.585502	0.000275172	0.11097	0.532109	-0.265663	0.128872	0.635638	5.35874e-05	0.30865	0.0757239	0.772653	8.60465e-08	-0.0432123	0.808271	-0.836389	7.28896e-10	0.109165	0.538841	0.764182	1.44547e-07	-0.619581	9.3304e-05
ENSG00000167202	TBC1D2B	23102	bisque4	0.0555891	0.754847	-0.185729	0.292959	-0.240125	0.171345	0.189206	0.283855	0.131625	0.45807	-0.315647	0.0689902	-0.504633	0.00233849	0.154749	0.382192	0.158941	0.369271	0.366305	0.0331137	-0.577113	0.000352665	0.106584	0.548537	-0.499095	0.00265788	-0.0380806	0.830689	0.663006	1.93048e-05	0.104041	0.558173	-0.471	0.00493098	0.307372	0.0770072
ENSG00000118705	RPN2	6185	bisque4	0.0783815	0.659486	0.232496	0.185774	0.218447	0.214544	0.26809	0.125284	0.160349	0.364992	0.0924409	0.603083	0.195041	0.268989	-0.675656	1.16194e-05	0.186209	0.291692	-0.0720043	0.685716	0.427109	0.0117587	0.300935	0.083729	0.688194	6.85381e-06	-0.133682	0.451011	-0.687119	7.1783e-06	0.346126	0.0449401	0.787662	3.24444e-08	-0.473372	0.00468946
ENSG00000244879	GABPB1-AS1	NA	bisque4	-0.0144163	0.935505	-0.243615	0.165017	-0.472399	0.00478732	-0.0176438	0.921107	0.199753	0.257365	-0.146383	0.408753	-0.549393	0.000764864	0.314429	0.0701267	-0.139061	0.432834	0.519408	0.00164433	-0.67491	1.19806e-05	-0.245848	0.161057	-0.811646	5.74104e-09	-0.0493954	0.781459	0.840312	5.0931e-10	0.0811884	0.648064	-0.479663	0.0040977	0.590631	0.000235644
ENSG00000105708	ZNF14	7561	bisque4	0.490928	0.00319798	0.251719	0.150973	0.0783483	0.659622	0.162639	0.358093	0.386068	0.024122	-0.333158	0.0541823	-0.473761	0.0046509	0.234707	0.181508	-0.0982211	0.58051	0.37448	0.0291102	-0.514289	0.00186102	-0.196975	0.264176	-0.581088	0.000313812	0.0723798	0.684161	0.587335	0.00026042	-0.0880261	0.620572	-0.427784	0.0116123	0.437096	0.00974251
ENSG00000150776	C11orf57	55216	bisque4	0.205327	0.244046	0.117272	0.508924	0.612878	0.000116568	-0.212144	0.228396	-0.289157	0.0971879	0.116784	0.510701	0.681268	9.20293e-06	0.172326	0.329779	-0.169111	0.339018	-0.60364	0.000157133	0.658343	2.31395e-05	0.092407	0.603216	0.544674	0.000866876	-0.0472636	0.790677	-0.75449	2.55048e-07	-0.566464	0.000478668	0.180572	0.306803	-0.245792	0.161156
ENSG00000142102	ATHL1	80162	bisque4	-0.196334	0.265766	-0.227929	0.194812	-0.393612	0.0212712	-0.143095	0.419471	0.0160277	0.928314	-0.0176639	0.921017	-0.408581	0.0164371	0.388962	0.0229933	0.0584606	0.7426	0.20948	0.234429	-0.586387	0.000267959	-0.248946	0.155677	-0.633414	5.79728e-05	0.173307	0.326993	0.805803	8.94729e-09	0.0618617	0.728175	-0.643365	4.05743e-05	0.338088	0.0505053
ENSG00000108405	P2RX1	5023	bisque4	-0.10981	0.536428	-0.23425	0.182384	-0.493005	0.00305233	0.106606	0.548455	0.232406	0.185951	-0.0352177	0.843254	-0.511159	0.00200549	-0.0648649	0.715514	0.120592	0.496917	0.428719	0.0114118	-0.521944	0.00154538	-0.0338705	0.84918	-0.486876	0.00349961	0.0396199	0.82395	0.616988	0.000101755	0.379003	0.0270713	-0.19166	0.277538	0.172473	0.329361
ENSG00000280091	CTC-312O10.3	NA	bisque4	-0.234644	0.181629	-0.125638	0.478944	-0.362823	0.0349504	-0.25777	0.141067	-0.0305808	0.863685	0.110474	0.533953	-0.247702	0.157821	0.416556	0.0142614	-0.156081	0.378058	0.170178	0.335935	-0.415495	0.0145362	-0.371696	0.0304265	-0.580189	0.000322246	0.090177	0.612025	0.636412	5.21335e-05	-0.0304751	0.864151	-0.506773	0.00222435	0.425539	0.0121057
ENSG00000166887	VPS39	23339	bisque4	-0.0630721	0.723063	-0.340308	0.0489165	-0.208166	0.237444	-0.243615	0.165016	-0.108662	0.540723	0.0155584	0.930408	-0.244821	0.16287	0.597399	0.00019127	-0.0437333	0.806003	0.0646395	0.716461	-0.466296	0.00544169	-0.161032	0.362924	-0.593727	0.000214318	0.0565844	0.750596	0.70891	2.70048e-06	-0.256928	0.142417	-0.764026	1.45902e-07	0.421917	0.0129394
ENSG00000099901	RANBP1	5902	bisque4	0.1361	0.442791	0.188754	0.285028	0.331336	0.0555942	0.243093	0.165952	0.145854	0.410466	0.0168796	0.924514	0.181981	0.302979	-0.549527	0.000762118	0.24874	0.15603	-0.167604	0.343404	0.403491	0.0179653	0.355455	0.0391096	0.662699	1.95378e-05	-0.138155	0.435868	-0.615406	0.000107245	0.226613	0.197471	0.609066	0.000132001	-0.478929	0.00416327
ENSG00000089280	FUS	2521	bisque4	-0.138863	0.433495	-0.0484568	0.785514	-0.544349	0.000874305	0.0893566	0.615279	0.374062	0.0293048	-0.0562532	0.752009	-0.570832	0.000422826	-0.103237	0.561236	-0.059389	0.738654	0.599337	0.000180018	-0.580085	0.000323238	-0.189137	0.284034	-0.601801	0.000166576	0.159099	0.368789	0.675635	1.16292e-05	0.461236	0.00604121	-0.0523978	0.768526	0.322335	0.0630006
ENSG00000223960	AC009948.5	NA	bisque4	-0.301034	0.083622	-0.243741	0.164791	-0.351676	0.0413931	-0.517165	0.00173639	-0.257822	0.140984	0.477953	0.00425182	0.0594036	0.738592	0.625915	7.52471e-05	-0.306569	0.0778222	-0.036112	0.839325	-0.2099	0.23347	-0.292251	0.0935027	-0.479588	0.00410432	-0.088444	0.618907	0.405973	0.0172059	-0.276646	0.113226	-0.529833	0.0012702	0.492759	0.00306928
ENSG00000157800	SLC37A3	84255	bisque4	0.0102509	0.954116	-0.225581	0.199576	-0.150716	0.394868	-0.278023	0.111369	-0.00525633	0.976463	-0.178075	0.31365	-0.182564	0.301405	0.604123	0.000154735	-0.276591	0.113301	0.127421	0.472678	-0.351234	0.0416666	0.0388233	0.827436	-0.645889	3.69886e-05	0.0661097	0.710287	0.604577	0.00015251	-0.352751	0.0407323	-0.54013	0.000976252	0.499162	0.00265384
ENSG00000259529	RP11-468E2.4	NA	bisque4	-0.12333	0.487121	-0.275574	0.114686	-0.656469	2.48657e-05	0.0774843	0.663154	0.287919	0.0986932	0.0336445	0.850175	-0.674967	1.19527e-05	0.118538	0.504328	0.00218885	0.990198	0.670577	1.42876e-05	-0.785139	3.84299e-08	-0.250483	0.153056	-0.7746	7.61413e-08	-0.0463919	0.794454	0.883794	4.36838e-12	0.375647	0.0285725	-0.394437	0.0209771	0.569322	0.000441435
ENSG00000093134	VNN3	55350	bisque4	0.0655961	0.712442	-0.304507	0.0799455	-0.3536	0.040217	0.0189505	0.915284	0.2303	0.190083	-0.195239	0.268494	-0.484353	0.00369961	0.289795	0.0964192	-0.180725	0.306385	0.523035	0.00150446	-0.569792	0.000435572	-0.109127	0.538982	-0.693864	5.35221e-06	-0.151004	0.393954	0.691602	5.91096e-06	-0.00231244	0.989644	-0.359236	0.0369279	0.577896	0.000344692
ENSG00000105298	CACTIN	58509	bisque4	0.381284	0.0260884	0.102362	0.564576	0.161908	0.360287	0.637775	4.96565e-05	0.424867	0.012257	-0.433571	0.0104178	-0.725859	1.18564e-06	-0.219687	0.211889	0.719665	1.61274e-06	0.314075	0.0704608	-0.691463	5.94704e-06	-0.102651	0.56347	-0.143231	0.419025	0.179646	0.30933	0.599774	0.000177565	0.43137	0.0108591	-0.507932	0.00216459	-0.04636	0.794593
ENSG00000238164	RP3-395M20.8	NA	bisque4	-0.125813	0.478328	-0.0564405	0.75121	-0.298346	0.0865565	-0.0679747	0.702481	0.0670932	0.706167	0.113492	0.52277	-0.357261	0.038055	0.319687	0.0653204	0.0723729	0.68419	0.204085	0.246973	-0.521342	0.00156841	-0.292358	0.0933777	-0.517779	0.00171073	0.217181	0.217279	0.646931	3.55936e-05	0.0954588	0.591251	-0.576201	0.000362167	0.331131	0.0557544
ENSG00000102001	CACNA1F	778	bisque4	-0.049637	0.780416	-0.196974	0.264178	-0.293745	0.0917616	-0.00726176	0.967488	0.205686	0.243206	-0.0645659	0.716771	-0.469751	0.00506242	0.155989	0.378343	0.103726	0.559369	0.251297	0.151682	-0.50601	0.00226445	-0.0269581	0.879708	-0.524151	0.00146359	0.220973	0.209159	0.689911	6.36304e-06	0.18351	0.298865	-0.427773	0.0116146	0.162272	0.359192
ENSG00000052841	TTC17	55761	bisque4	-0.370947	0.030789	-0.164095	0.353747	-0.0663906	0.709109	-0.660013	2.16931e-05	-0.461374	0.00602417	0.403296	0.0180264	0.697985	4.45599e-06	0.439405	0.00932057	-0.618111	9.80155e-05	-0.40919	0.0162615	0.600172	0.000175358	0.134038	0.449797	0.112742	0.525536	-0.235496	0.180001	-0.473511	0.00467561	-0.528321	0.00131933	0.210893	0.231215	0.123773	0.485547
ENSG00000145545	SRD5A1	6715	bisque4	-0.25373	0.147626	-0.150565	0.395348	0.113336	0.523345	-0.258208	0.140369	-0.395635	0.0205561	0.341146	0.0483271	0.638888	4.77155e-05	-0.226062	0.198594	-0.127769	0.471459	-0.488224	0.00339664	0.769553	1.04299e-07	0.349857	0.0425298	0.665657	1.73908e-05	-0.136607	0.441075	-0.797726	1.6133e-08	-0.115693	0.514683	0.568687	0.000449484	-0.510002	0.00206131
ENSG00000140367	UBE2Q2	92912	bisque4	0.288389	0.0981196	0.107481	0.54516	-0.289492	0.0967837	0.53368	0.00115236	0.635316	5.42043e-05	-0.342512	0.0473779	-0.741649	5.20714e-07	-0.446397	0.0081362	0.126361	0.476397	0.782759	4.4992e-08	-0.596794	0.000194905	-0.231746	0.187239	-0.412469	0.0153442	-0.0580979	0.744144	0.490722	0.00321275	0.603065	0.000160031	0.136805	0.440407	0.250642	0.152788
ENSG00000148291	SURF2	6835	bisque4	-0.0479644	0.787643	0.0621763	0.726846	0.414002	0.0149301	-0.113898	0.521271	-0.37228	0.0301463	0.22702	0.196647	0.656231	2.50926e-05	-0.203676	0.247941	0.00877173	0.960732	-0.585424	0.000275818	0.769719	1.03239e-07	0.292925	0.0927141	0.806652	8.39642e-09	-0.00426918	0.980883	-0.892618	1.31825e-12	-0.230486	0.189715	0.481073	0.00397432	-0.531027	0.00123253
ENSG00000054965	FAM168A	23201	bisque4	-0.051559	0.772133	-0.280168	0.108523	-0.380371	0.0264782	0.164419	0.352784	0.0587531	0.741357	-0.190415	0.280731	-0.565235	0.00049551	0.211963	0.228803	0.203546	0.248251	0.401873	0.0184756	-0.697594	4.53462e-06	-0.156234	0.377585	-0.593862	0.000213429	0.0488799	0.783686	0.802773	1.11968e-08	0.158517	0.370568	-0.637549	5.00596e-05	0.373366	0.0296314
ENSG00000122203	KIAA1191	57179	bisque4	0.0896907	0.613953	0.235069	0.180816	0.445323	0.00830931	0.0887566	0.617664	-0.081785	0.645647	0.099561	0.575332	0.498484	0.00269535	-0.449416	0.00766601	0.0654427	0.713086	-0.401007	0.0187534	0.692549	5.67079e-06	0.321931	0.0633502	0.817561	3.60597e-09	-0.0421834	0.812754	-0.899849	4.55845e-13	-0.00449699	0.979863	0.696847	4.68863e-06	-0.578486	0.000338793
ENSG00000156639	ZFAND3	60685	bisque4	0.181059	0.305478	0.110544	0.533694	0.239629	0.172258	0.435314	0.010079	0.174895	0.32251	-0.124164	0.484159	0.101366	0.56839	-0.712518	2.2775e-06	0.26511	0.1297	0.0117461	0.947433	0.360056	0.036468	0.289264	0.0970591	0.659987	2.17153e-05	-0.160877	0.363394	-0.644269	3.92553e-05	0.359283	0.0369011	0.714225	2.09925e-06	-0.503155	0.00242027
ENSG00000134516	DOCK2	1794	bisque4	0.184545	0.296101	0.0188897	0.915555	0.152939	0.38785	0.44368	0.00858025	0.198738	0.259838	0.00791549	0.964562	0.00917559	0.958925	-0.512865	0.0019256	0.272157	0.119439	0.158229	0.371449	0.0983186	0.580133	0.189509	0.283069	0.487931	0.00341876	-0.48195	0.00389918	-0.462714	0.00586046	0.33619	0.0518965	0.482	0.0038949	-0.11482	0.517883
ENSG00000236308	RP11-316M21.7	NA	bisque4	-0.0732011	0.680765	-0.201761	0.252513	-0.402705	0.0182117	-0.0698927	0.694483	0.138603	0.434366	-0.181505	0.304267	-0.463507	0.00576543	0.375836	0.0284862	-0.156523	0.376691	0.424579	0.0123221	-0.595908	0.000200348	-0.249137	0.155349	-0.754763	2.51094e-07	-0.0209059	0.906579	0.8092	6.92525e-09	0.00151286	0.993225	-0.510129	0.0020551	0.569766	0.000435892
ENSG00000174227	PIGG	54872	bisque4	-0.0836227	0.638222	-0.229645	0.19138	-0.164287	0.353174	-0.390823	0.0222909	-0.14927	0.399471	-0.0123836	0.944584	-0.138687	0.434086	0.699344	4.19179e-06	-0.216256	0.219293	-0.0260343	0.883802	-0.365604	0.0334771	-0.24991	0.154031	-0.641316	4.3714e-05	0.156496	0.376776	0.676138	1.13911e-05	-0.386024	0.0241398	-0.746803	3.92978e-07	0.435181	0.0101045
ENSG00000156017	C9orf41	138199	bisque4	0.132819	0.453965	0.0210538	0.905921	0.502106	0.00247983	-0.237241	0.176703	-0.299511	0.085275	0.142965	0.419899	0.584677	0.000282053	0.333775	0.0537113	-0.144877	0.413644	-0.516956	0.00174521	0.431636	0.010805	-0.124679	0.482334	0.347181	0.0442478	-0.0709508	0.690085	-0.532769	0.00117935	-0.547813	0.000797761	-0.0629194	0.723708	-0.0277741	0.876095
ENSG00000274021	RP11-823E8.3	NA	bisque4	-0.0146201	0.934595	-0.121316	0.494317	-0.503908	0.00237832	0.318889	0.0660333	0.510031	0.00205988	-0.193708	0.27234	-0.739027	5.9935e-07	-0.195027	0.269025	0.1438	0.41716	0.706428	3.03188e-06	-0.723062	1.36375e-06	-0.116329	0.512361	-0.579411	0.000329719	-0.00658021	0.970538	0.73629	6.92938e-07	0.593776	0.000213995	-0.104911	0.554868	0.333723	0.0537503
ENSG00000100216	TOMM22	56993	bisque4	0.0892431	0.61573	0.369774	0.0313632	0.328849	0.0575674	0.2191	0.213143	0.129814	0.464334	-0.0512155	0.773612	0.283666	0.103999	-0.662809	1.94537e-05	0.0434991	0.807022	-0.173446	0.326598	0.589642	0.000242846	0.258143	0.140472	0.70624	3.05847e-06	0.00548189	0.975454	-0.762061	1.6405e-07	0.230248	0.190186	0.860587	6.76195e-11	-0.600541	0.000173333
ENSG00000154359	LONRF1	91694	bisque4	-0.263702	0.131826	-0.260257	0.137137	-0.78157	4.86453e-08	0.159819	0.366598	0.23328	0.184253	0.10671	0.548063	-0.571964	0.000409339	-0.144279	0.415594	0.0309083	0.862239	0.714697	2.05231e-06	-0.635951	5.29948e-05	-0.151313	0.392976	-0.557159	0.000619919	-0.260799	0.136291	0.606619	0.000142851	0.581441	0.000310555	-0.0607724	0.732786	0.462925	0.00583511
ENSG00000147454	SLC25A37	51312	bisque4	-0.038828	0.827415	-0.300091	0.0846429	-0.572316	0.000405217	0.244205	0.163963	0.401393	0.0186291	-0.246227	0.160392	-0.720236	1.56823e-06	-0.0922119	0.603985	0.10429	0.557225	0.704225	3.3566e-06	-0.708468	2.75693e-06	0.0030909	0.986158	-0.64382	3.99058e-05	-0.0838202	0.637426	0.780316	5.27905e-08	0.469916	0.00504482	-0.197041	0.264014	0.382503	0.0255754
ENSG00000170855	TRIAP1	51499	bisque4	0.305361	0.0790602	0.332499	0.0546894	0.561045	0.000556978	0.0836083	0.63828	0.136372	0.441869	-0.0795094	0.654887	0.3705	0.031007	-0.404961	0.0175122	-0.033254	0.851895	-0.332387	0.054776	0.590311	0.000237955	0.161245	0.362283	0.613887	0.000112762	0.103824	0.558998	-0.716178	1.91098e-06	-0.0699873	0.69409	0.66094	2.09263e-05	-0.518453	0.00168299
ENSG00000198825	INPP5F	22876	bisque4	-0.0759137	0.669591	-0.0930625	0.600637	-0.472456	0.00478146	-0.089589	0.614357	0.213064	0.226338	-0.0313371	0.860346	-0.497391	0.00276356	0.349893	0.0425071	-0.170107	0.336141	0.456866	0.0066037	-0.660769	2.1066e-05	-0.488378	0.00338504	-0.824777	1.99821e-09	0.159659	0.367084	0.835007	8.25163e-10	0.102772	0.563009	-0.49588	0.00286022	0.536775	0.00106463
ENSG00000135378	PRRG4	79056	bisque4	-0.333488	0.0539298	-0.11158	0.529841	0.179207	0.310533	-0.475525	0.0044792	-0.617733	9.92616e-05	0.464331	0.00566818	0.877525	9.66307e-12	0.125771	0.478477	-0.222437	0.20608	-0.693268	5.4946e-06	0.807295	7.99998e-09	0.135301	0.445497	0.616387	0.00010381	-0.158826	0.369622	-0.831803	1.09547e-09	-0.425741	0.0120607	0.326989	0.0590792	-0.354588	0.0396238
ENSG00000260121	RP5-1142A6.9	NA	bisque4	-0.0249463	0.888627	-0.14636	0.408829	-0.0982761	0.580297	-0.240326	0.170975	-0.0432755	0.807996	-0.0675624	0.704204	-0.252676	0.149373	0.602023	0.00016541	-0.0538322	0.762369	0.0124113	0.94446	-0.466474	0.00542162	-0.281347	0.106982	-0.605882	0.000146273	0.262955	0.132965	0.732587	8.40835e-07	-0.25843	0.140016	-0.785047	3.86659e-08	0.370981	0.0307725
ENSG00000170417	TMEM182	130827	bisque4	0.248773	0.155974	0.197207	0.263602	-0.108276	0.542173	0.109168	0.538829	0.417075	0.0141288	-0.19083	0.279665	-0.466389	0.00543119	0.274032	0.116813	-0.20715	0.239793	0.518066	0.00169889	-0.613942	0.00011256	-0.381746	0.025893	-0.68117	9.24112e-06	-0.0437214	0.806055	0.620831	8.94616e-05	0.019533	0.91269	-0.362067	0.0353598	0.691835	5.85119e-06
ENSG00000164967	RPP25L	138716	bisque4	-0.428827	0.0113887	-0.105446	0.552841	0.220564	0.210023	-0.522704	0.00151678	-0.780809	5.11234e-08	0.447945	0.00789209	0.897492	6.49999e-13	0.155522	0.379789	-0.105556	0.552423	-0.887846	2.55122e-12	0.880958	6.29069e-12	0.239717	0.172096	0.691911	5.83168e-06	0.126281	0.476679	-0.787422	3.2973e-08	-0.460469	0.00613684	0.181397	0.30456	-0.569952	0.000433587
ENSG00000248734	CTD-2260A17.1	NA	bisque4	-0.00530858	0.976229	-0.24444	0.163546	-0.345771	0.0451748	-0.0895552	0.614491	0.109911	0.536054	-0.213306	0.225798	-0.483822	0.00374291	0.485616	0.0035983	-0.121108	0.495062	0.3679	0.0322993	-0.633383	5.80364e-05	-0.170511	0.334976	-0.811905	5.62725e-09	0.0959323	0.589403	0.867146	3.28558e-11	-0.0919373	0.605067	-0.673187	1.28538e-05	0.55719	0.000619395
ENSG00000258424	RP11-471B22.2	NA	bisque4	0.124108	0.48436	-0.199885	0.257044	-0.156589	0.376488	0.0861361	0.628123	0.25522	0.145183	-0.0790712	0.656673	-0.536544	0.00107098	0.276655	0.113213	0.222897	0.20512	0.290101	0.096052	-0.699094	4.2393e-06	-0.16799	0.342278	-0.570549	0.000426264	0.124594	0.482636	0.807613	7.8107e-09	0.121861	0.492365	-0.676266	1.13312e-05	0.355384	0.0391513
ENSG00000119421	NDUFA8	4702	bisque4	-0.392479	0.0216805	-0.153018	0.387603	0.182158	0.3025	-0.632008	6.09107e-05	-0.650778	3.08449e-05	0.476475	0.00438895	0.918839	1.81367e-14	0.251958	0.150572	-0.333057	0.0542597	-0.774164	7.82625e-08	0.866355	3.59143e-11	0.209749	0.233814	0.560262	0.000569188	-0.0745548	0.67518	-0.778337	6.00002e-08	-0.532088	0.00119991	0.291554	0.0943232	-0.336032	0.052014
ENSG00000280149	RP4-751H13.5	NA	bisque4	-0.161908	0.360286	-0.344904	0.0457531	-0.150355	0.396016	-0.333579	0.0538607	-0.283309	0.104455	0.154651	0.382499	-0.0275247	0.877199	0.54944	0.000763891	-0.0946865	0.594269	-0.140696	0.427392	-0.209224	0.235013	-0.0715197	0.687725	-0.3845	0.0247525	0.184546	0.296099	0.440938	0.00904899	-0.298869	0.0859795	-0.609161	0.000131596	0.247836	0.15759
ENSG00000257242	C12orf79	256021	bisque4	0.425994	0.0120043	0.150648	0.395086	-0.17797	0.31394	0.452826	0.00716292	0.623278	8.23437e-05	-0.508005	0.00216084	-0.832789	1.00463e-09	-0.0456334	0.797745	0.0425619	0.811104	0.787205	3.34593e-08	-0.816292	3.98992e-09	-0.227949	0.194772	-0.71728	1.81174e-06	-0.0550727	0.757056	0.801725	1.20896e-08	0.295156	0.0901413	-0.298758	0.0861021	0.547806	0.000797907
ENSG00000274943	RP11-351C21.2	NA	bisque4	0.367135	0.0326881	0.236299	0.178478	-0.106436	0.549095	0.318012	0.0668233	0.591727	0.000227889	-0.416579	0.0142556	-0.761723	1.67368e-07	0.0777753	0.661963	0.0893082	0.615471	0.604925	0.000150825	-0.776738	6.6474e-08	-0.304543	0.0799076	-0.704834	3.26374e-06	0.127743	0.471551	0.836245	7.38405e-10	0.217891	0.215742	-0.429786	0.0111866	0.444548	0.00843623
ENSG00000162888	C1orf147	NA	bisque4	0.0122648	0.945115	-0.294236	0.0911949	-0.140915	0.426663	-0.0781978	0.660237	0.0146862	0.9343	-0.0891818	0.615973	-0.350452	0.0421552	0.428795	0.0113956	0.0695332	0.69598	0.12459	0.482651	-0.499279	0.00264669	-0.0546199	0.758994	-0.513261	0.00190744	0.156557	0.376588	0.685245	7.77773e-06	-0.10111	0.569373	-0.687855	6.95453e-06	0.363884	0.0343821
ENSG00000122986	HVCN1	84329	bisque4	-0.434992	0.0101409	-0.0636108	0.720792	0.210373	0.232396	-0.648464	3.36284e-05	-0.755746	2.37306e-07	0.414674	0.0147519	0.949668	1.08607e-17	0.317843	0.0669765	-0.327604	0.058576	-0.845525	3.1157e-10	0.880059	7.04796e-12	0.217969	0.215575	0.55013	0.000749915	0.0558878	0.75357	-0.755265	2.43967e-07	-0.592094	0.000225343	0.174588	0.323375	-0.366971	0.0327716
ENSG00000132716	DCAF8	50717	bisque4	0.00931337	0.958309	-0.186045	0.292125	-0.243896	0.164515	-0.15758	0.373438	0.0763226	0.667913	-0.24475	0.162995	-0.422936	0.0127001	0.528299	0.00132004	-0.116706	0.510984	0.233582	0.183671	-0.561736	0.000546405	-0.172051	0.330564	-0.773568	8.12501e-08	0.19101	0.279202	0.863781	4.7801e-11	-0.1889	0.284648	-0.709967	2.56975e-06	0.438209	0.00953713
ENSG00000103494	RPGRIP1L	23322	bisque4	-0.072972	0.681712	-0.016833	0.924722	-0.18266	0.301149	-0.224334	0.202139	-0.0353836	0.842525	-0.18227	0.3022	-0.218077	0.215341	0.516494	0.00176478	-0.182865	0.300597	0.075247	0.672331	-0.356618	0.0384277	-0.277292	0.112351	-0.622708	8.39539e-05	0.333962	0.0535684	0.645753	3.71753e-05	-0.231736	0.187259	-0.584747	0.000281463	0.320251	0.0648215
ENSG00000103657	HERC1	8925	bisque4	0.298911	0.0859331	0.109543	0.537426	-0.231006	0.188691	0.320616	0.0644996	0.501159	0.00253468	-0.235545	0.179908	-0.624348	7.9395e-05	0.117983	0.50634	-0.0543882	0.759986	0.730928	9.1606e-07	-0.756351	2.29165e-07	-0.367048	0.0327326	-0.674255	1.23059e-05	-0.346383	0.0447707	0.634018	5.67518e-05	0.201978	0.251991	-0.315858	0.0687945	0.77177	9.09193e-08
ENSG00000140939	NOL3	8996	bisque4	-0.0599767	0.736159	-0.358976	0.0370748	-0.156405	0.377057	-0.241669	0.168523	-0.0685777	0.699963	0.0471349	0.791234	-0.238328	0.174668	0.476469	0.00438958	0.0712416	0.688878	-0.0275782	0.876962	-0.399863	0.0191258	-0.0784728	0.659114	-0.472848	0.00474197	0.20258	0.25055	0.647299	3.51122e-05	-0.14598	0.410059	-0.70734	2.90606e-06	0.214667	0.22278
ENSG00000124783	SSR1	6745	bisque4	0.0674359	0.704733	0.265814	0.128647	0.268329	0.124935	0.198371	0.260739	0.058438	0.742697	0.0629153	0.723725	0.340902	0.0484978	-0.544323	0.000874923	0.0320445	0.857226	-0.128461	0.46904	0.516391	0.0017692	0.271521	0.120339	0.668724	1.53919e-05	-0.160916	0.363275	-0.786824	3.43286e-08	0.174857	0.322619	0.777709	6.24722e-08	-0.401171	0.0187006
ENSG00000120458	MSANTD2	79684	bisque4	-0.0687649	0.699182	-0.212123	0.228442	-0.108104	0.542816	-0.398721	0.0195037	-0.112431	0.526689	0.130196	0.463006	-0.0471418	0.791204	0.674025	1.24224e-05	-0.195083	0.268885	-0.0858028	0.629458	-0.320975	0.0641841	-0.477643	0.00428029	-0.568275	0.000454762	0.135583	0.44454	0.551613	0.000720641	-0.368637	0.0319288	-0.686792	7.27978e-06	0.412921	0.0152209
ENSG00000272145	NFYC-AS1	NA	bisque4	-0.0104711	0.953132	-0.0390212	0.826569	-0.365809	0.0333705	0.00108277	0.995151	0.237735	0.175776	-0.168976	0.33941	-0.51815	0.00169541	0.306681	0.0777073	-0.0443207	0.803448	0.426458	0.0119016	-0.626797	7.30018e-05	-0.19764	0.262535	-0.734271	7.70339e-07	0.0212731	0.904946	0.803834	1.03555e-08	0.0809916	0.648862	-0.511917	0.00196962	0.479775	0.00408774
ENSG00000164896	FASTK	10922	bisque4	-0.0897348	0.613778	-0.366848	0.0328348	0.203836	0.247562	-0.270231	0.122181	-0.362235	0.0352687	0.0735109	0.679486	0.146033	0.409887	0.402987	0.0181232	0.271487	0.120387	-0.535233	0.00110758	0.0356488	0.84136	0.112873	0.525053	0.0699515	0.694239	0.281238	0.107124	0.176713	0.317427	-0.322136	0.0631725	-0.603706	0.000156801	-0.253943	0.147275
ENSG00000176444	CLK2	1196	bisque4	0.056782	0.749752	-0.213871	0.224542	0.0647594	0.715957	-0.292063	0.0937237	-0.110607	0.53346	-0.099209	0.576691	-0.129897	0.464044	0.672409	1.32671e-05	-0.0325523	0.854987	-0.16175	0.360759	-0.33049	0.0562594	-0.183848	0.297961	-0.503408	0.00240613	0.256774	0.142664	0.617024	0.000101636	-0.430775	0.0109811	-0.81228	5.46604e-09	0.253168	0.148556
ENSG00000141252	VPS53	55275	bisque4	-0.0228581	0.897899	-0.312098	0.0723446	-0.426306	0.0119353	0.231548	0.187626	0.142733	0.420661	-0.0662358	0.709759	-0.576574	0.000358256	0.116712	0.510962	0.193128	0.273806	0.503421	0.00240538	-0.69489	5.11481e-06	-0.0915213	0.606708	-0.52358	0.00148436	-0.109039	0.53931	0.687968	6.92087e-06	0.28216	0.105929	-0.459207	0.00629696	0.434661	0.0102048
ENSG00000147419	CCDC25	55246	bisque4	0.0218912	0.902197	0.110508	0.533825	0.180981	0.30569	-0.13719	0.439111	-0.0417086	0.814825	0.0764887	0.667232	0.405039	0.0174886	-0.126965	0.474276	-0.291588	0.0942831	-0.173698	0.325885	0.499221	0.00265024	0.187241	0.288977	0.341212	0.0482806	-0.248502	0.156441	-0.592817	0.000220398	-0.170655	0.334562	0.564328	0.000508288	-0.142806	0.42042
ENSG00000104979	C19orf53	28974	bisque4	-0.0168016	0.924862	0.326564	0.0594297	0.295496	0.089753	0.167838	0.342719	0.00264122	0.988172	0.0142407	0.936289	0.336068	0.051987	-0.658444	2.3049e-05	0.145768	0.410747	-0.288367	0.0981463	0.64328	4.07002e-05	0.321498	0.0637263	0.788637	3.03697e-08	0.0808355	0.649496	-0.787444	3.2925e-08	0.235187	0.180591	0.800459	1.32546e-08	-0.716063	1.92165e-06
ENSG00000260077	RP11-254F7.2	NA	bisque4	-0.145731	0.410867	-0.297078	0.0879679	-0.240328	0.170971	-0.196247	0.265982	-0.195822	0.26704	-0.056552	0.750734	-0.236169	0.178724	0.384059	0.0249325	0.0659811	0.710826	-0.0179554	0.919718	-0.333521	0.0539047	-0.00897723	0.959813	-0.435906	0.00996608	0.26046	0.13682	0.606875	0.000141681	-0.134933	0.446749	-0.637433	5.02676e-05	0.0946669	0.594345
ENSG00000214900	LINC01588	283551	bisque4	-0.25204	0.150435	-0.267383	0.126322	-0.50281	0.00243973	-0.0943345	0.595647	0.0688959	0.698635	0.220523	0.210111	-0.387545	0.0235405	0.173005	0.32785	-0.0392511	0.825563	0.343526	0.0466838	-0.502076	0.00248155	-0.161645	0.361077	-0.519533	0.00163931	0.123644	0.486005	0.615757	0.000106005	0.231235	0.188239	-0.319113	0.0658323	0.393693	0.0212419
ENSG00000135002	RFK	55312	bisque4	0.122545	0.489921	0.180195	0.307831	0.371844	0.0303552	-0.0674829	0.704536	-0.213544	0.225269	0.235271	0.18043	0.470081	0.0050274	-0.140117	0.429315	0.0240467	0.89262	-0.431228	0.0108882	0.495398	0.00289164	0.156078	0.378068	0.561935	0.000543379	0.0127768	0.942827	-0.631916	6.11062e-05	-0.166861	0.345578	0.306623	0.077767	-0.368961	0.0317665
ENSG00000013573	DDX11	1663	bisque4	0.0354761	0.842118	-0.0533354	0.7645	-0.152682	0.388658	-0.0317122	0.858691	0.173869	0.325402	-0.21306	0.226346	-0.353409	0.0403327	0.306364	0.078031	-0.123244	0.487428	0.257242	0.141912	-0.447098	0.00802494	-0.343305	0.0468343	-0.574292	0.000382783	0.13582	0.443738	0.624098	8.00769e-05	-0.0493784	0.781532	-0.41822	0.0138396	0.340671	0.0486605
ENSG00000226015	CCT8P1	NA	bisque4	-0.0276291	0.876737	-0.0464556	0.794178	-0.389446	0.022809	-0.0993726	0.576059	0.196409	0.265579	-0.228919	0.192828	-0.436884	0.00978199	0.398912	0.0194401	-0.233888	0.18308	0.422592	0.0127804	-0.566034	0.000484501	-0.20975	0.233813	-0.812953	5.1878e-09	0.0243028	0.891483	0.785537	3.74232e-08	-0.0419091	0.81395	-0.475331	0.00449773	0.538578	0.0010163
ENSG00000170919	TPT1-AS1	NA	bisque4	-0.12316	0.487729	-0.267328	0.126403	-0.346721	0.0445485	-0.156012	0.378273	-0.0384027	0.829278	-0.195631	0.267514	-0.396475	0.0202652	0.504011	0.0023726	-0.0845563	0.634463	0.233599	0.183637	-0.538468	0.00101921	-0.129732	0.464617	-0.718994	1.66659e-06	0.16278	0.357671	0.822432	2.4278e-09	-0.125528	0.479335	-0.714401	2.08158e-06	0.463096	0.00581457
ENSG00000145743	FBXL17	64839	bisque4	0.105696	0.551893	0.384837	0.0246161	0.241255	0.169277	0.135891	0.443496	0.0745306	0.67528	-0.257336	0.141762	0.243337	0.165515	-0.392459	0.0216877	-0.18807	0.286809	-0.0545678	0.759217	0.476996	0.00434019	0.207096	0.239918	0.371475	0.0305333	0.125358	0.479933	-0.559453	0.00058205	0.0269708	0.879652	0.64936	3.25241e-05	-0.301938	0.0826524
ENSG00000171307	ZDHHC16	84287	bisque4	-0.369833	0.0313342	-0.0908058	0.609536	0.3043	0.0801609	-0.552177	0.000709792	-0.73965	5.79729e-07	0.379706	0.026765	0.880087	7.02259e-12	0.255354	0.144964	-0.111542	0.529982	-0.915419	3.42398e-14	0.837635	6.51094e-10	0.2401	0.171391	0.643294	4.06801e-05	0.103823	0.559002	-0.71372	2.15067e-06	-0.534487	0.00112888	0.0759737	0.669345	-0.50412	0.00236659
ENSG00000134717	BTF3L4	91408	bisque4	0.132854	0.453846	0.144372	0.415292	0.259688	0.138028	-0.125852	0.478191	-0.0119388	0.946571	0.151486	0.39243	0.502421	0.00246181	-0.151168	0.393437	-0.350252	0.0422808	-0.173128	0.327501	0.543495	0.000894157	0.106178	0.55007	0.389316	0.0228581	-0.201835	0.252335	-0.716907	1.84478e-06	-0.205434	0.243796	0.648436	3.36623e-05	-0.140556	0.427856
ENSG00000156711	MAPK13	5603	bisque4	-0.0298129	0.867077	-0.178693	0.311948	-0.479868	0.00407958	0.194034	0.271518	0.403598	0.0179323	-0.226845	0.197001	-0.661889	2.01669e-05	-0.104539	0.55628	0.0931022	0.600481	0.581262	0.000312203	-0.614685	0.000109834	-0.0908532	0.609348	-0.602316	0.000163879	0.185333	0.294006	0.737148	6.62235e-07	0.433936	0.0103459	-0.181363	0.304651	0.276925	0.112848
ENSG00000152291	TGOLN2	10618	bisque4	0.237487	0.176241	0.192075	0.276481	0.240347	0.170936	0.458816	0.00634732	0.251957	0.150574	-0.162559	0.358331	0.0284582	0.873067	-0.685974	7.53927e-06	0.274834	0.115704	0.070972	0.689997	0.255473	0.14477	0.235066	0.180822	0.556863	0.000624962	-0.153725	0.385388	-0.537721	0.00103904	0.362327	0.0352184	0.655213	2.60868e-05	-0.389901	0.0226364
ENSG00000139625	MAP3K12	7786	bisque4	-0.0703778	0.692466	-0.192094	0.276432	-0.0303217	0.864829	-0.314687	0.0698852	-0.2382	0.174908	-0.111622	0.529684	-0.0697628	0.695024	0.676242	1.13423e-05	-0.0793157	0.655676	-0.176165	0.318955	-0.260584	0.136627	-0.148619	0.401554	-0.478603	0.00419267	0.224481	0.201834	0.55691	0.000624158	-0.429592	0.0112273	-0.796413	1.77106e-08	0.244836	0.162843
ENSG00000240401	AC012358.8	NA	bisque4	0.188723	0.285108	-0.0784957	0.65902	-0.170544	0.334881	0.0253373	0.886893	0.165242	0.350346	-0.19336	0.27322	-0.410565	0.0158714	0.413886	0.0149611	-0.194871	0.269414	0.422244	0.0128622	-0.53258	0.00118502	-0.100716	0.570885	-0.654552	2.67513e-05	-0.134311	0.448866	0.618081	9.81123e-05	-0.163076	0.356785	-0.514312	0.00186001	0.692434	5.69943e-06
ENSG00000149016	TUT1	64852	bisque4	-0.0708084	0.690677	-0.23691	0.177326	-0.2019	0.252178	-0.0591262	0.73977	-0.0503645	0.777278	-0.130741	0.46112	-0.400571	0.0188947	0.420639	0.0132447	0.167167	0.344681	0.0980734	0.581082	-0.556503	0.00063114	-0.269801	0.1228	-0.550334	0.000745836	0.216993	0.217688	0.78421	4.088e-08	-0.0634571	0.72144	-0.791068	2.57205e-08	0.226849	0.196994
ENSG00000213366	GSTM2	2946	bisque4	-0.159256	0.368311	0.0238941	0.893297	-0.305844	0.0785629	-0.0902981	0.611545	0.0649531	0.715143	-0.226007	0.198705	-0.307262	0.0771185	0.209626	0.234095	-0.124674	0.482352	0.239187	0.173073	-0.353807	0.0400924	-0.108723	0.540494	-0.518554	0.00167887	0.099826	0.574311	0.582909	0.000297319	0.0322889	0.856148	-0.315381	0.0692372	0.235608	0.179789
ENSG00000186312	CA5BP1	340591	bisque4	-0.253329	0.148289	-0.241856	0.168185	-0.595019	0.000205939	0.0705927	0.691573	0.0698483	0.694668	0.0211712	0.905399	-0.42537	0.0121437	0.0829392	0.640979	-0.0422331	0.812538	0.520127	0.00161572	-0.515714	0.00179831	-0.214784	0.222523	-0.528163	0.00132456	-0.254115	0.146993	0.563252	0.000523808	0.273055	0.118176	-0.244874	0.162776	0.476561	0.00438089
ENSG00000185909	KLHDC8B	200942	bisque4	-0.0134907	0.939638	0.131364	0.458971	0.504429	0.00234965	-0.279878	0.108904	-0.462117	0.00593289	0.259558	0.138233	0.650622	3.10261e-05	0.277867	0.111578	-0.0496749	0.780252	-0.661524	2.04557e-05	0.504391	0.00235173	-0.0570908	0.748435	0.497074	0.00278354	0.108407	0.541681	-0.578099	0.000342652	-0.520014	0.00162017	-0.0580567	0.744319	-0.222227	0.20652
ENSG00000108799	EZH1	2145	bisque4	0.060545	0.733749	-0.159266	0.368282	-0.0852552	0.631655	-0.14807	0.403315	0.0379604	0.831216	-0.303719	0.0807683	-0.34735	0.0441371	0.551588	0.000721138	-0.0423625	0.811973	0.0819425	0.645009	-0.470903	0.00494112	-0.160965	0.363128	-0.655529	2.57745e-05	0.221457	0.208138	0.778064	6.10644e-08	-0.260516	0.136733	-0.757746	2.11374e-07	0.310365	0.0740282
ENSG00000167377	ZNF23	7571	bisque4	0.0968311	0.585904	-0.254207	0.146841	-0.0352612	0.843063	-0.209972	0.233307	-0.0307624	0.862883	-0.110582	0.533551	-0.202383	0.25102	0.522848	0.00151141	-0.148276	0.402652	0.036367	0.838205	-0.358703	0.037229	-0.0491715	0.782426	-0.554863	0.000659997	0.124619	0.482547	0.586281	0.00026881	-0.319051	0.0658885	-0.617108	0.000101352	0.367918	0.0322902
ENSG00000244038	DDOST	1650	bisque4	0.0850986	0.632284	0.306644	0.0777451	0.361731	0.0355428	0.321716	0.0635369	0.0697963	0.694884	-0.028972	0.870795	0.250977	0.152222	-0.720642	1.53717e-06	0.287526	0.0991752	-0.228461	0.193745	0.529757	0.00127263	0.330917	0.0559226	0.831986	1.07799e-09	-0.000304336	0.998637	-0.764799	1.39292e-07	0.321144	0.0640359	0.755228	2.44482e-07	-0.673959	1.24559e-05
ENSG00000095787	WAC	51322	bisque4	0.289849	0.096354	0.147601	0.404822	-0.0853744	0.631176	0.203028	0.249482	0.514057	0.00187143	0.0213561	0.904577	-0.183414	0.299123	-0.20377	0.247719	-0.242742	0.166584	0.535238	0.00110744	-0.24635	0.160177	-0.408661	0.0164139	-0.214388	0.223396	-0.374155	0.0292612	-0.0179788	0.919614	0.224213	0.202388	0.398687	0.0195149	0.409019	0.0163107
ENSG00000114745	GORASP1	64689	bisque4	-0.0634155	0.721615	-0.233228	0.184353	-0.134882	0.446922	-0.115031	0.51711	-0.0391046	0.826205	0.102748	0.563102	-0.296718	0.0883713	0.357074	0.0381631	0.170167	0.335969	0.0136543	0.938907	-0.480979	0.00398243	-0.217232	0.21717	-0.406064	0.0171787	0.281285	0.107062	0.651841	2.96385e-05	-0.0220173	0.901636	-0.671099	1.39901e-05	0.190122	0.281486
ENSG00000153574	RPIA	22934	bisque4	0.116763	0.510778	0.145244	0.412449	0.258242	0.140315	0.24345	0.165312	0.0891212	0.616214	0.0996378	0.575036	0.216356	0.219075	-0.574713	0.000378144	0.239194	0.173061	-0.158671	0.370096	0.417327	0.0140645	0.228222	0.194223	0.666692	1.66913e-05	-0.0410558	0.817675	-0.651154	3.04133e-05	0.267467	0.126198	0.629174	6.72401e-05	-0.495296	0.00289835
ENSG00000239382	ALKBH6	84964	bisque4	0.0389324	0.826958	-0.161569	0.361305	-0.198658	0.260034	-0.0203671	0.908977	0.141625	0.424315	-0.298221	0.0866947	-0.514797	0.00183845	0.37326	0.0296811	0.0529961	0.765956	0.246941	0.159144	-0.598777	0.000183209	-0.0994068	0.575927	-0.675915	1.14961e-05	0.305354	0.0790671	0.866775	3.42601e-11	-0.0292986	0.86935	-0.682944	8.57558e-06	0.312034	0.0724058
ENSG00000111325	OGFOD2	79676	bisque4	-0.0452867	0.79925	-0.125844	0.478217	-0.120545	0.497085	-0.302336	0.0822289	-0.0557754	0.754051	-0.185497	0.293573	-0.185442	0.29372	0.629027	6.75844e-05	-0.183635	0.29853	0.0133916	0.940081	-0.347762	0.0438696	-0.177755	0.314537	-0.634302	5.6186e-05	0.107675	0.544429	0.656657	2.46871e-05	-0.344914	0.0457461	-0.697476	4.5586e-06	0.362238	0.0352667
ENSG00000120594	PLXDC2	84898	bisque4	0.0555747	0.754908	0.095475	0.591187	0.242365	0.167264	0.0668524	0.707175	-0.137576	0.437813	0.105537	0.552496	0.439455	0.00931152	-0.278868	0.110241	-0.0773355	0.663762	-0.188546	0.285569	0.549172	0.000769378	0.39533	0.0206625	0.584002	0.000287798	-0.314953	0.0696358	-0.764764	1.3958e-07	-0.0899401	0.612964	0.564749	0.000502318	-0.214137	0.223953
ENSG00000159596	TMEM69	51249	bisque4	-0.306735	0.0776528	-0.173209	0.327271	0.227982	0.194705	-0.597103	0.000193042	-0.706601	3.0076e-06	0.34326	0.0468652	0.932666	1.01064e-15	0.30514	0.0792889	-0.364306	0.0341581	-0.771875	9.03302e-08	0.872954	1.67829e-11	0.210714	0.23162	0.520898	0.00158555	-0.0845018	0.634682	-0.779245	5.65862e-08	-0.647141	3.53181e-05	0.221446	0.20816	-0.317642	0.0671585
ENSG00000060971	ACAA1	30	bisque4	-0.480881	0.00399088	-0.191365	0.278294	-0.053091	0.765549	-0.310459	0.073936	-0.463058	0.00581911	0.455108	0.00684231	0.537154	0.00105431	-0.260097	0.137388	0.0734311	0.679815	-0.539972	0.000980278	0.670138	1.45423e-05	0.287849	0.0987791	0.662116	1.99887e-05	0.0380609	0.830775	-0.621707	8.68527e-05	0.0546264	0.758966	0.432648	0.010601	-0.63741	5.03099e-05
ENSG00000168237	GLYCTK	132158	bisque4	-0.0571755	0.748074	-0.209002	0.235522	-0.179841	0.308797	-0.0496569	0.78033	0.0419571	0.813741	-0.24965	0.154473	-0.41643	0.0142939	0.26664	0.127419	0.110929	0.532259	0.113902	0.521259	-0.448989	0.00773112	-0.0855253	0.630571	-0.501673	0.00250481	0.352165	0.0410917	0.731039	9.10861e-07	-0.0033333	0.985073	-0.574677	0.000378545	0.0995952	0.5752
ENSG00000198160	MIER1	57708	bisque4	0.33098	0.0558731	0.165784	0.348743	-0.362746	0.0349916	0.508989	0.00211132	0.785138	3.84311e-08	-0.291349	0.0945662	-0.784183	4.0951e-08	-0.337766	0.0507398	-0.0203629	0.908996	0.960113	2.83383e-19	-0.726053	1.17414e-06	-0.284592	0.102826	-0.592728	0.000221	-0.1998	0.257249	0.557145	0.000620152	0.577246	0.000351303	0.165711	0.34896	0.513125	0.00191363
ENSG00000141568	FOXK2	3607	bisque4	-0.0501672	0.778129	-0.0422669	0.81239	0.467565	0.00529969	-0.177665	0.314783	-0.462625	0.00587123	0.259831	0.137804	0.683196	8.48502e-06	0.0058865	0.973642	0.101557	0.567659	-0.683172	8.49352e-06	0.68637	7.41252e-06	0.171383	0.332473	0.763455	1.50975e-07	-0.140313	0.428663	-0.79775	1.61046e-08	-0.356954	0.0382323	0.181197	0.305103	-0.446567	0.00810919
ENSG00000273464	RP11-313P22.1	NA	bisque4	0.342251	0.0475582	0.00106308	0.995239	-0.0403325	0.820834	0.0722606	0.684655	0.303098	0.081421	-0.146562	0.408173	-0.434769	0.0101839	0.262117	0.134251	-0.0389049	0.827079	0.341364	0.0481744	-0.54614	0.000833953	-0.135621	0.444413	-0.569611	0.000437818	0.037672	0.83248	0.599739	0.000177761	-0.0664324	0.708934	-0.445245	0.00832205	0.439714	0.00926527
ENSG00000181322	NME9	347736	bisque4	0.443833	0.00855464	-0.0326014	0.85477	0.0834934	0.638743	0.162031	0.359916	0.373369	0.0296299	-0.36121	0.0358288	-0.528922	0.0012996	0.291249	0.0946848	-0.0888713	0.617207	0.395639	0.0205548	-0.599552	0.000178809	-0.121115	0.495036	-0.632664	5.95243e-05	0.120894	0.49583	0.681606	9.0733e-06	-0.121353	0.494184	-0.485628	0.00359729	0.538863	0.00100885
ENSG00000203865	ATP1A1-AS1	84852	bisque4	-0.135611	0.444448	-0.106801	0.547718	-0.555844	0.000642599	0.141235	0.425605	0.22325	0.204385	-0.0612244	0.730872	-0.590219	0.000238621	0.0255154	0.886103	-0.0045743	0.979517	0.59122	0.000231451	-0.647489	3.4867e-05	-0.090867	0.609294	-0.625426	7.65216e-05	0.0619934	0.727619	0.72634	1.15724e-06	0.371355	0.0305911	-0.272477	0.118987	0.433869	0.0103591
ENSG00000163596	ICA1L	130026	bisque4	0.290719	0.0953135	0.0162145	0.92748	-0.170987	0.333609	0.130702	0.461257	0.404256	0.0177285	-0.25264	0.149434	-0.570167	0.000430931	0.261713	0.134875	-0.223153	0.204586	0.588805	0.000249094	-0.6532	2.81577e-05	-0.230573	0.189544	-0.745231	4.28519e-07	-0.101199	0.569029	0.70899	2.69045e-06	0.0119316	0.946604	-0.380548	0.0264023	0.698013	4.45026e-06
ENSG00000113569	NUP155	9631	bisque4	0.360747	0.0360841	0.171326	0.332637	-0.192121	0.276362	0.414871	0.0146998	0.6663	1.69532e-05	-0.326204	0.0597268	-0.808975	7.04507e-09	-0.0498804	0.779366	0.0656504	0.712214	0.766395	1.26492e-07	-0.85072	1.87455e-10	-0.369257	0.0316193	-0.702561	3.6226e-06	0.0136659	0.938856	0.798057	1.57559e-08	0.371409	0.0305651	-0.284927	0.102404	0.553518	0.000684526
ENSG00000135457	TFCP2	7024	bisque4	-0.362418	0.0351695	-0.113691	0.522034	0.200121	0.256469	-0.64611	3.66892e-05	-0.720627	1.53833e-06	0.417809	0.0139428	0.921921	9.98469e-15	0.418607	0.013743	-0.377713	0.0276403	-0.775365	7.25399e-08	0.816658	3.87548e-09	0.269427	0.12334	0.456477	0.00665577	-0.0349217	0.844555	-0.713729	2.1497e-06	-0.663262	1.91116e-05	0.114865	0.517717	-0.211847	0.229064
ENSG00000133392	MYH11	4629	bisque4	0.29387	0.0916173	0.24776	0.157722	-0.076237	0.668264	0.268126	0.125232	0.446739	0.00808176	-0.339108	0.0497701	-0.591681	0.000228209	0.166564	0.34645	0.00905376	0.95947	0.513119	0.00191392	-0.684306	8.09495e-06	-0.379196	0.026987	-0.631823	6.13058e-05	0.00649831	0.970904	0.694756	5.14534e-06	0.106567	0.548601	-0.432376	0.0106555	0.528999	0.00129709
ENSG00000112685	EXOC2	55770	bisque4	-0.368542	0.0319764	-0.240387	0.170863	0.00622553	0.972125	-0.501035	0.00254197	-0.605304	0.000149006	0.413092	0.0151748	0.7347	7.53233e-07	0.329901	0.0567264	-0.351697	0.0413798	-0.495051	0.00291451	0.598482	0.00018491	0.0870391	0.62451	0.325289	0.0604889	-0.254462	0.146422	-0.594004	0.000212494	-0.483977	0.00373025	0.14373	0.41739	-0.028204	0.874192
ENSG00000112305	SMAP1	60682	bisque4	-0.0378196	0.831833	-0.00305577	0.986316	0.241986	0.16795	0.209892	0.233489	-0.117712	0.507323	0.111036	0.531862	0.291678	0.0941767	-0.426785	0.0118298	0.253582	0.147871	-0.222134	0.206714	0.414787	0.014722	0.210495	0.232117	0.690892	6.09718e-06	-0.216466	0.218834	-0.647698	3.45977e-05	0.167288	0.344329	0.445832	0.00822698	-0.402215	0.0183666
ENSG00000108306	FBXL20	84961	bisque4	0.4383	0.00952037	0.0349398	0.844476	-0.0403494	0.82076	0.157716	0.373021	0.469009	0.00514185	-0.32455	0.0611093	-0.584582	0.000282855	0.389972	0.0226097	-0.168245	0.341536	0.567841	0.000460403	-0.71648	1.88335e-06	-0.145711	0.410932	-0.781957	4.74279e-08	-0.141229	0.425625	0.745503	4.22157e-07	-0.105761	0.551648	-0.522721	0.00151613	0.759671	1.88893e-07
ENSG00000159423	ALDH4A1	8659	bisque4	0.0660343	0.710603	0.0797313	0.653984	0.371543	0.0305004	0.132102	0.456427	-0.178381	0.312805	0.071723	0.686882	0.354951	0.039408	-0.286264	0.100733	0.309208	0.0751683	-0.415896	0.0144318	0.441453	0.00895943	0.0952615	0.592021	0.655451	2.5851e-05	-0.109	0.539458	-0.614607	0.000110116	-0.00504611	0.977404	0.249707	0.154375	-0.509397	0.00209104
ENSG00000263276	RP11-96D1.10	NA	bisque4	-0.0142069	0.93644	0.0907226	0.609865	-0.170449	0.335154	-0.0871458	0.624084	0.030105	0.865787	-0.0123241	0.94485	-0.296333	0.0888058	0.390513	0.0224063	-0.1624	0.358808	0.226225	0.198262	-0.438309	0.00951885	-0.338244	0.0503924	-0.551397	0.000724849	0.231621	0.187483	0.570923	0.000421726	-0.118562	0.504241	-0.518738	0.00167136	0.492896	0.00305985
ENSG00000136044	APPL2	55198	bisque4	-0.221908	0.207189	-0.141027	0.426292	-0.479431	0.00411836	-0.173324	0.326943	0.183044	0.300115	-0.0732229	0.680675	-0.386323	0.0240209	0.336263	0.0518425	-0.208369	0.236976	0.396238	0.0203468	-0.50879	0.00212124	-0.237502	0.176213	-0.728866	1.01809e-06	-0.051583	0.77203	0.714389	2.08278e-06	0.0796483	0.654322	-0.383262	0.0252599	0.537301	0.00105034
ENSG00000125971	DYNLRB1	83658	bisque4	-0.474221	0.00460552	-0.0747509	0.674373	0.0263864	0.882241	-0.367105	0.0327036	-0.547522	0.000803956	0.510761	0.00202452	0.746698	3.95267e-07	-0.220568	0.210015	-0.0882351	0.619739	-0.610521	0.000125908	0.843678	3.71562e-10	0.371357	0.0305902	0.760779	1.76974e-07	-0.00983028	0.955997	-0.851256	1.77702e-10	-0.0760443	0.669055	0.58354	0.000291794	-0.579202	0.000331748
ENSG00000235674	LDHAP2	NA	bisque4	0.332375	0.0547854	-0.0584336	0.742715	-0.129234	0.466349	0.173192	0.327319	0.349746	0.0425998	-0.157848	0.372614	-0.478229	0.00422658	0.25189	0.150685	-0.151822	0.391369	0.545531	0.000847497	-0.604814	0.00015136	-0.227893	0.194884	-0.606299	0.000144329	-0.185087	0.294659	0.55254	0.000702866	-0.00925162	0.958585	-0.357637	0.0378381	0.667312	1.62848e-05
ENSG00000260276	RP11-77H9.2	NA	bisque4	0.0803418	0.651501	-0.190315	0.280989	-0.194451	0.270468	0.0109427	0.951024	0.338255	0.0503843	-0.175475	0.320883	-0.467491	0.00530779	0.255102	0.145374	-0.0807607	0.649799	0.382277	0.0256699	-0.53698	0.00105904	-0.197293	0.26339	-0.612301	0.000118796	-0.0268894	0.880013	0.676038	1.1438e-05	0.0677792	0.703297	-0.38101	0.0262049	0.44235	0.00880505
ENSG00000225855	RUSC1-AS1	NA	bisque4	-0.0556253	0.754692	-0.146393	0.40872	-0.215923	0.220021	-0.33979	0.0492834	-0.0397115	0.823549	-0.0550433	0.757181	-0.248862	0.155822	0.699898	4.0883e-06	-0.262417	0.133789	0.102386	0.564482	-0.469454	0.00509406	-0.295717	0.0895024	-0.77284	8.50449e-08	0.209689	0.233951	0.785233	3.81897e-08	-0.325101	0.060646	-0.767824	1.1596e-07	0.5343	0.00113429
ENSG00000096093	EFHC1	114327	bisque4	0.0188072	0.915923	-0.0486648	0.784615	-0.244827	0.162858	-0.119543	0.500693	0.16179	0.36064	-0.298119	0.0868076	-0.469685	0.00506946	0.420651	0.0132418	-0.137818	0.436997	0.269063	0.123867	-0.524482	0.00145165	-0.223567	0.203727	-0.761166	1.72978e-07	0.243079	0.165977	0.853883	1.36291e-10	-0.0894986	0.614715	-0.607051	0.000140877	0.378795	0.0271625
ENSG00000168386	FILIP1L	11259	bisque4	0.00126772	0.994323	-0.054423	0.759837	-0.303105	0.0814143	0.307764	0.0766112	0.211198	0.230527	-0.381343	0.0260632	-0.533768	0.00114977	-0.140752	0.427206	0.221581	0.207877	0.405526	0.0173409	-0.468018	0.00524966	-0.0535615	0.76353	-0.387577	0.0235281	0.140113	0.429326	0.554108	0.000673667	0.331413	0.0555339	-0.209875	0.233528	0.0305126	0.863986
ENSG00000272994	RP11-332H14.2	NA	bisque4	-0.0185506	0.917066	-0.224473	0.201851	-0.335742	0.0522299	0.114362	0.519566	0.27472	0.11586	-0.256926	0.14242	-0.608575	0.000134118	0.111646	0.529595	0.146152	0.409502	0.409235	0.0162488	-0.635396	5.40492e-05	-0.0466477	0.793345	-0.609315	0.000130942	0.212696	0.22716	0.808375	7.37313e-09	0.260368	0.136964	-0.460089	0.00618465	0.270472	0.121835
ENSG00000132879	FBXO44	93611	bisque4	-0.156542	0.376634	-0.27767	0.111843	-0.17326	0.327125	-0.221811	0.207392	-0.0617614	0.7286	-0.0140749	0.937029	-0.206007	0.242454	0.250276	0.153408	0.0965249	0.587095	-0.100437	0.57196	-0.224928	0.200915	-0.079829	0.653586	-0.314579	0.0699864	0.358623	0.0372744	0.518494	0.00168132	-0.00247227	0.988929	-0.453325	0.00709176	-0.0665676	0.708368
ENSG00000157306	RP11-66N24.4	NA	bisque4	0.0139775	0.937464	-0.215242	0.221514	-0.322778	0.062619	0.0167925	0.924902	0.173093	0.327599	-0.212372	0.227885	-0.568886	0.000446948	0.38095	0.0262305	0.0540032	0.761636	0.375063	0.0288407	-0.70876	2.71953e-06	-0.239823	0.1719	-0.753151	2.75318e-07	0.158631	0.370219	0.909604	9.50578e-14	0.034039	0.848438	-0.696352	4.79321e-06	0.438519	0.00948049
ENSG00000236383	LINC00854	100874261	bisque4	-0.109805	0.536447	-0.326023	0.0598769	-0.32814	0.0581403	-0.225975	0.198771	-0.115044	0.517061	0.0911341	0.608238	-0.309903	0.0744813	0.628639	6.85011e-05	-0.0728116	0.682375	0.170582	0.334771	-0.572593	0.000402005	-0.264634	0.130417	-0.697269	4.601e-06	0.0501767	0.778088	0.781972	4.7382e-08	-0.199398	0.258227	-0.823506	2.22147e-09	0.559664	0.000578666
ENSG00000079459	FDFT1	2222	bisque4	-0.307788	0.0765873	-0.182471	0.301657	0.0999408	0.573868	-0.395641	0.020554	-0.533252	0.00116498	0.414381	0.0148294	0.754638	2.52902e-07	-0.0760186	0.66916	-0.215747	0.220406	-0.585223	0.000277485	0.843201	3.8872e-10	0.423819	0.0124958	0.653409	2.79362e-05	-0.0679934	0.702402	-0.81256	5.34875e-09	-0.277552	0.112001	0.518971	0.00166192	-0.47994	0.00407316
ENSG00000176986	SEC24C	9632	bisque4	0.0251721	0.887626	-0.201193	0.253879	-0.209308	0.234821	0.236625	0.177862	0.141722	0.423993	-0.226175	0.198364	-0.554321	0.000669784	0.03939	0.824956	0.461203	0.00604535	0.237571	0.176083	-0.628009	7.00105e-05	-0.0348655	0.844802	-0.378443	0.0273172	0.165372	0.349961	0.722203	1.42318e-06	0.276266	0.113742	-0.577455	0.000349167	0.0697737	0.694979
ENSG00000182541	LIMK2	3985	bisque4	-0.018008	0.919484	-0.359484	0.036788	-0.567629	0.000463171	0.313863	0.0706607	0.356733	0.0383604	-0.161783	0.360662	-0.648442	3.3655e-05	-0.210161	0.232877	0.12388	0.485168	0.734529	7.60023e-07	-0.648585	3.34766e-05	0.0227448	0.898402	-0.505824	0.00227435	-0.265558	0.12903	0.603006	0.000160331	0.510907	0.00201753	-0.050399	0.777129	0.378994	0.0270753
ENSG00000162384	C1orf123	54987	bisque4	-0.324319	0.0613045	0.0183091	0.918142	0.200007	0.256747	-0.535783	0.00109211	-0.503031	0.00242727	0.35265	0.0407945	0.831673	1.10798e-09	0.0559303	0.753389	-0.362263	0.0352533	-0.700206	4.03173e-06	0.927306	3.31039e-15	0.299452	0.0853393	0.574384	0.000381771	0.124235	0.483908	-0.804341	9.9744e-09	-0.414286	0.0148544	0.481675	0.00392255	-0.470727	0.00495948
ENSG00000248476	BACH1-IT1	NA	bisque4	-0.166313	0.347187	-0.380904	0.0262499	-0.589806	0.000241641	-0.121689	0.49298	0.0579492	0.744777	0.0549665	0.75751	-0.408359	0.0165014	0.398758	0.0194912	-0.195834	0.267008	0.506303	0.00224898	-0.61741	0.000100335	-0.152227	0.390091	-0.764382	1.42827e-07	-0.167416	0.343954	0.734198	7.73254e-07	0.0477066	0.788759	-0.463216	0.00580015	0.738733	6.08815e-07
ENSG00000112855	HARS2	23438	bisque4	0.145274	0.412352	-0.272634	0.118767	-0.0870999	0.624268	-0.1435	0.418143	0.0603595	0.734536	-0.26246	0.133724	-0.341595	0.0480131	0.557883	0.000607731	-0.116932	0.51016	0.155968	0.378407	-0.496607	0.00281332	-0.0778935	0.66148	-0.69927	4.2058e-06	0.19249	0.275425	0.75421	2.59167e-07	-0.307109	0.0772728	-0.717661	1.77852e-06	0.419823	0.013443
ENSG00000110955	ATP5B	506	bisque4	0.0210222	0.906062	0.162427	0.358728	0.138298	0.435389	0.293794	0.0917054	0.152683	0.388657	0.0431326	0.808618	0.16292	0.357251	-0.729749	9.73202e-07	0.173334	0.326915	-0.017162	0.923255	0.418328	0.0138125	0.231255	0.188201	0.671562	1.37304e-05	-0.197229	0.263548	-0.671493	1.37685e-05	0.408508	0.0164582	0.843428	3.8046e-10	-0.483831	0.00374217
ENSG00000167397	VKORC1	79001	bisque4	0.0253211	0.886965	0.247672	0.157874	0.299902	0.0848488	-0.158209	0.37151	-0.138659	0.43418	0.103673	0.559573	0.503977	0.00237448	-0.198013	0.261618	-0.193761	0.272207	-0.394457	0.0209699	0.670028	1.46073e-05	0.22982	0.191034	0.506231	0.0022528	0.158329	0.371142	-0.696063	4.85541e-06	-0.195523	0.267783	0.571575	0.000413931	-0.45358	0.00705563
ENSG00000115170	ACVR1	90	bisque4	-0.36444	0.0340878	-0.167875	0.342614	0.0622636	0.726477	-0.328193	0.0580974	-0.603282	0.000158934	0.407466	0.0167622	0.749007	3.47722e-07	-0.0320075	0.857389	-0.135955	0.44328	-0.564949	0.000499506	0.760128	1.83887e-07	0.278102	0.111263	0.639533	4.66211e-05	-0.1425	0.421428	-0.795285	1.91797e-08	-0.264387	0.130789	0.375766	0.0285181	-0.391619	0.0219956
ENSG00000115548	KDM3A	55818	bisque4	0.441983	0.00886788	0.155666	0.379344	-0.186088	0.292011	0.563417	0.000521397	0.760679	1.78021e-07	-0.52531	0.00142217	-0.934821	6.10121e-16	-0.178957	0.31122	0.146992	0.406784	0.853893	1.36154e-10	-0.87669	1.07053e-11	-0.273969	0.1169	-0.688019	6.90579e-06	0.00274828	0.987693	0.831315	1.14313e-09	0.459936	0.00620404	-0.227493	0.195691	0.460047	0.00619006
ENSG00000270069	MIR222HG	NA	bisque4	-0.119146	0.502128	-0.0925057	0.602828	-0.617225	0.000100955	0.225786	0.199156	0.431581	0.0108162	-0.0485951	0.784916	-0.716265	1.90297e-06	-0.171669	0.331655	0.0929798	0.600962	0.703037	3.5445e-06	-0.722401	1.40925e-06	-0.174782	0.322828	-0.617669	9.94711e-05	0.052485	0.768151	0.760476	1.80168e-07	0.61505	0.000108516	-0.124411	0.483284	0.350972	0.04183
ENSG00000164707	SLC13A4	26266	bisque4	-0.23558	0.179841	-0.279587	0.109288	-0.0663635	0.709223	-0.390117	0.0225552	-0.320531	0.0645739	0.0295926	0.868051	0.0937712	0.597855	0.504616	0.00233945	-0.102017	0.565896	-0.281821	0.106367	-0.0384314	0.829152	-0.192555	0.275259	-0.278608	0.110587	0.284597	0.10282	0.32887	0.0575507	-0.367709	0.0323961	-0.542484	0.000918146	0.105877	0.551208
ENSG00000173275	ZNF449	203523	bisque4	-0.0368857	0.835928	-0.137234	0.438964	-0.199667	0.257573	-0.35611	0.0387244	-0.00210854	0.990557	0.0713107	0.688591	-0.163947	0.354186	0.549489	0.000762902	-0.28531	0.101924	0.0656063	0.712399	-0.316782	0.0679434	-0.10685	0.547534	-0.62633	7.41824e-05	0.294638	0.0907331	0.593443	0.000216199	-0.261874	0.134625	-0.521809	0.00155052	0.394388	0.0209946
ENSG00000264456	RP11-848P1.2	NA	bisque4	-0.208185	0.237399	-0.267918	0.125535	-0.376379	0.0282392	-0.241884	0.168134	-0.0915767	0.60649	0.285535	0.101641	-0.259109	0.138941	0.424689	0.0122972	-0.0173487	0.922422	0.120217	0.498266	-0.484248	0.00370809	-0.180121	0.308033	-0.548735	0.000778411	0.168981	0.339396	0.650488	3.11821e-05	0.011296	0.949444	-0.629104	6.74043e-05	0.405583	0.0173234
ENSG00000168792	ABHD15	116236	bisque4	0.072655	0.683023	0.294125	0.0913231	0.603833	0.000156169	-0.186724	0.290334	-0.330665	0.0561209	0.0276915	0.87646	0.674028	1.24207e-05	0.0803875	0.651315	-0.101017	0.569728	-0.662114	1.99905e-05	0.716893	1.84604e-06	0.118335	0.505064	0.613971	0.000112449	-0.000629671	0.99718	-0.759467	1.91172e-07	-0.486156	0.00355572	0.212811	0.226902	-0.396176	0.0203682
ENSG00000198690	FAN1	22909	bisque4	0.0578483	0.745207	-0.240496	0.170663	-0.330497	0.0562536	-0.0215668	0.903639	0.209607	0.234138	-0.186459	0.291031	-0.486005	0.00356757	0.413895	0.0149587	-0.106728	0.547995	0.431887	0.0107541	-0.655276	2.60244e-05	-0.0899167	0.613056	-0.769347	1.05628e-07	0.00840503	0.962372	0.799165	1.4552e-08	-0.0235188	0.894964	-0.567141	0.0004696	0.597359	0.000191505
ENSG00000010295	IFFO1	25900	bisque4	0.0246842	0.88979	-0.26232	0.133939	0.0444366	0.802944	-0.200824	0.254769	-0.110882	0.532436	-0.168256	0.341503	-0.196842	0.264507	0.594297	0.000210585	0.0700348	0.693892	-0.128554	0.468716	-0.363213	0.0347405	-0.0860301	0.628547	-0.443362	0.00863347	0.189235	0.283778	0.620301	9.10742e-05	-0.329839	0.0567751	-0.807619	7.80708e-09	0.215514	0.220917
ENSG00000167085	PHB	5245	bisque4	-0.01796	0.919697	0.211834	0.229092	0.412699	0.0152813	-0.112871	0.525062	-0.171407	0.332404	0.253316	0.148311	0.579984	0.000324202	-0.227985	0.194699	-0.0345528	0.846178	-0.484735	0.00366865	0.682484	8.7438e-06	0.222476	0.205998	0.729717	9.74804e-07	-0.0859282	0.628956	-0.830013	1.28003e-09	-0.140722	0.427303	0.545145	0.00085618	-0.444937	0.0083723
ENSG00000161277	THAP8	199745	bisque4	-0.377284	0.0278319	-0.0726818	0.682912	0.261759	0.134803	-0.591303	0.00023086	-0.804524	9.8404e-09	0.431085	0.0109176	0.892241	1.39048e-12	0.367407	0.0325493	-0.18155	0.304145	-0.892256	1.38757e-12	0.781374	4.92742e-08	0.0984424	0.579654	0.548048	0.000792798	0.130638	0.461476	-0.662984	1.93211e-05	-0.605136	0.00014981	-0.017144	0.923335	-0.397352	0.0199647
ENSG00000063127	SLC6A16	28968	bisque4	-0.0872045	0.62385	0.082195	0.643987	-0.089195	0.615921	-0.335218	0.052621	-0.0740435	0.677288	0.132544	0.454909	-0.0853444	0.631297	0.539774	0.000985314	-0.103272	0.561099	-0.104542	0.556268	-0.273966	0.116904	-0.341074	0.0483775	-0.46487	0.00560525	0.291903	0.0939121	0.520648	0.00159526	-0.223687	0.203477	-0.626441	7.39003e-05	0.260385	0.136937
ENSG00000167216	KATNAL2	83473	bisque4	-0.0951106	0.59261	-0.051752	0.771303	-0.321443	0.063775	-0.019736	0.911786	0.0783047	0.6598	-0.197709	0.262365	-0.406917	0.0169243	0.222717	0.205495	-0.0267583	0.880593	0.290921	0.0950741	-0.463517	0.00576428	-0.0523708	0.768642	-0.555573	0.000647363	0.127671	0.471801	0.656266	2.50592e-05	0.083795	0.637528	-0.422332	0.0128414	0.319891	0.0651399
ENSG00000187650	VMAC	400673	bisque4	-0.127379	0.472825	-0.258439	0.140002	-0.199197	0.258718	0.0189319	0.915367	-0.10657	0.548592	-0.0976924	0.582559	-0.390077	0.02257	0.278645	0.110537	0.337833	0.050691	0.0381436	0.830413	-0.483921	0.0037348	0.0273014	0.878188	-0.36914	0.0316777	0.259951	0.137616	0.67751	1.07638e-05	0.0509248	0.774864	-0.736975	6.68338e-07	0.0656012	0.712421
ENSG00000237892	KLF7-IT1	NA	bisque4	-0.150066	0.396933	-0.13406	0.44972	-0.682619	8.69436e-06	0.113744	0.521839	0.365058	0.0337622	0.0168839	0.924495	-0.644725	3.86057e-05	0.0302807	0.86501	-0.0996517	0.574982	0.750042	3.28164e-07	-0.709109	2.67544e-06	-0.188828	0.284836	-0.728425	1.04124e-06	-0.166522	0.346574	0.756213	2.31008e-07	0.446881	0.00805922	-0.183657	0.298472	0.608976	0.000132386
ENSG00000067167	TRAM1	23471	bisque4	0.0743263	0.676122	0.308162	0.0762114	0.12798	0.470722	0.153232	0.386932	0.179847	0.308781	0.0686395	0.699705	0.258474	0.139946	-0.558757	0.000593307	-0.153336	0.386607	0.0533847	0.764288	0.445664	0.00825399	0.169411	0.338149	0.487205	0.00347424	-0.194534	0.270259	-0.691667	5.89415e-06	0.22861	0.193445	0.884094	4.2003e-12	-0.259724	0.137972
ENSG00000086475	SEPHS1	22929	bisque4	-0.0426561	0.810694	0.336369	0.0517646	0.347625	0.0439585	-0.132506	0.45504	-0.192438	0.275557	0.0842345	0.635758	0.579149	0.000332259	-0.193649	0.272487	-0.172605	0.328987	-0.417131	0.0141144	0.672227	1.33656e-05	0.0556717	0.754494	0.570349	0.0004287	0.0673072	0.705271	-0.769295	1.05967e-07	-0.187099	0.289348	0.546936	0.000816565	-0.394539	0.0209409
ENSG00000151640	DPYSL4	10570	bisque4	0.150554	0.395382	0.225403	0.19994	-0.198342	0.260811	0.301	0.0836585	0.34299	0.0470496	-0.341233	0.0482658	-0.548529	0.000782695	-0.0600933	0.735665	0.0435745	0.806694	0.495401	0.00289146	-0.523143	0.00150046	-0.134096	0.449598	-0.467837	0.0052696	0.0552117	0.756461	0.535318	0.00110517	0.280225	0.108448	-0.1996	0.257736	0.293532	0.0920088
ENSG00000198431	TXNRD1	7296	bisque4	0.119987	0.499093	0.0479128	0.787867	0.282406	0.105611	-0.0531013	0.765505	-0.249378	0.154938	0.279129	0.109895	0.48764	0.00344089	-0.138543	0.434566	-0.0545829	0.759152	-0.316594	0.0681159	0.47947	0.00411488	0.101278	0.568726	0.532229	0.00119562	-0.224757	0.201267	-0.693777	5.37262e-06	-0.208795	0.235998	0.377114	0.0279079	-0.224429	0.201943
ENSG00000271631	RP11-408O19.5	NA	bisque4	0.0571428	0.748213	-0.148375	0.402337	-0.179781	0.30896	-0.105085	0.554209	0.133898	0.450272	-0.293834	0.0916588	-0.320941	0.0642139	0.416689	0.0142274	-0.123075	0.488031	0.226385	0.197936	-0.423763	0.0125088	0.0330192	0.852929	-0.634497	5.57982e-05	0.051252	0.773455	0.63706	5.09419e-05	-0.165204	0.350457	-0.508172	0.0021524	0.379385	0.0269046
ENSG00000161558	TMEM143	55260	bisque4	-0.0971734	0.584574	-0.133815	0.450559	0.0838057	0.637484	-0.208779	0.236033	-0.37884	0.0271427	-0.0561175	0.752589	0.0651063	0.714499	0.417911	0.0139171	0.119665	0.500252	-0.353698	0.0401582	-0.00871519	0.960985	0.0859732	0.628775	-0.0911983	0.607984	0.303693	0.0807959	0.266929	0.126992	-0.360535	0.0362016	-0.58367	0.000290667	-0.119126	0.502201
ENSG00000122042	UBL3	5412	bisque4	0.202077	0.251755	0.280339	0.108298	0.147136	0.406322	0.300217	0.0845055	0.279004	0.110061	-0.0908674	0.609292	0.147269	0.405893	-0.545108	0.00085702	-0.0700006	0.694035	0.165252	0.350316	0.322341	0.0629955	0.166781	0.345814	0.409392	0.0162038	-0.30989	0.0744945	-0.611033	0.000123823	0.237911	0.175447	0.789346	2.89406e-08	-0.168289	0.341407
ENSG00000279861	RP11-43N16.4	NA	bisque4	-0.105131	0.554035	-0.162254	0.359245	-0.518286	0.00168982	0.12174	0.492796	0.246305	0.160255	-0.0367341	0.836594	-0.666919	1.65416e-05	0.115647	0.514853	0.140177	0.429113	0.53512	0.00111078	-0.765014	1.37496e-07	-0.249098	0.155416	-0.669823	1.47277e-05	0.084741	0.63372	0.883277	4.6714e-12	0.362568	0.0350878	-0.49284	0.00306369	0.394585	0.0209248
ENSG00000142528	ZNF473	25888	bisque4	-0.20107	0.254174	-0.371561	0.0304917	-0.679443	9.93344e-06	0.168029	0.342164	0.225476	0.19979	0.127125	0.473713	-0.56519	0.000496145	-0.124966	0.481319	0.097634	0.582786	0.639205	4.7174e-05	-0.637484	5.0176e-05	-0.0729015	0.682003	-0.507295	0.00219723	-0.0747429	0.674406	0.611135	0.000123409	0.519314	0.0016481	-0.104377	0.556894	0.393195	0.0214211
ENSG00000101412	E2F1	1869	bisque4	0.0298838	0.866764	0.0961716	0.588471	-0.23233	0.186099	0.19098	0.279279	0.276026	0.114069	0.0739254	0.677775	-0.518214	0.00169278	-0.0542716	0.760486	0.275211	0.115185	0.333353	0.0540329	-0.568795	0.0004481	-0.345679	0.0452358	-0.347834	0.0438236	0.276416	0.113538	0.572859	0.000398945	0.371765	0.0303935	-0.334137	0.0534358	0.137809	0.437028
ENSG00000267680	ZNF224	7767	bisque4	-0.0435334	0.806873	-0.161588	0.361248	-0.211423	0.230017	-0.400005	0.0190793	-0.0110313	0.950627	-0.0639436	0.71939	-0.207982	0.237867	0.737383	6.54068e-07	-0.363803	0.0344252	0.120093	0.498711	-0.429523	0.0112417	-0.221702	0.207623	-0.803078	1.09486e-08	0.185581	0.293349	0.750667	3.16844e-07	-0.394351	0.0210075	-0.691948	5.82231e-06	0.580279	0.0003214
ENSG00000235481	UBE2R2-AS1	NA	bisque4	-0.0790267	0.656854	-0.181818	0.303421	-0.611892	0.000120397	0.224444	0.201911	0.394046	0.0211162	-0.117023	0.509829	-0.707725	2.85441e-06	-0.146966	0.406869	0.0566216	0.750436	0.707593	2.87192e-06	-0.695961	4.87748e-06	-0.159306	0.368158	-0.640223	4.54753e-05	0.00772884	0.965398	0.758374	2.03783e-07	0.540321	0.00097142	-0.138473	0.434801	0.366057	0.0332421
ENSG00000105609	LILRB5	10990	bisque4	-0.011519	0.948447	-0.170718	0.334383	-0.292592	0.0931031	0.216501	0.218757	0.182092	0.302678	-0.11406	0.520676	-0.562662	0.000532508	0.100837	0.570421	0.357713	0.0377942	0.346836	0.0444728	-0.678662	1.02618e-05	-0.345383	0.0454328	-0.457363	0.00653748	-0.002096	0.990613	0.73396	7.82907e-07	0.279726	0.109105	-0.572602	0.0004019	0.234322	0.182246
ENSG00000197343	ZNF655	79027	bisque4	-0.0500834	0.77849	-0.130673	0.461358	-0.515368	0.00181339	0.0352761	0.842997	0.352968	0.0406007	-0.161396	0.361827	-0.644522	3.88945e-05	0.1823	0.302117	-0.048532	0.785189	0.58162	0.000308915	-0.737462	6.51313e-07	-0.327098	0.0589903	-0.819737	3.02616e-09	0.0847034	0.633871	0.904307	2.27372e-13	0.271514	0.120349	-0.419608	0.0134956	0.497948	0.00272861
ENSG00000276488	CTD-2537I9.18	NA	bisque4	0.159163	0.368595	-0.179654	0.309308	-0.129977	0.463768	0.0825401	0.642592	0.188578	0.285485	-0.315935	0.0687236	-0.516935	0.00174609	0.340794	0.0485735	0.0388021	0.827529	0.323599	0.0619155	-0.632041	6.08399e-05	-0.1527	0.388602	-0.664907	1.79136e-05	0.186639	0.290558	0.811837	5.6566e-09	-0.0594253	0.7385	-0.641856	4.28658e-05	0.400601	0.018885
ENSG00000160766	GBAP1	2630	bisque4	-0.120746	0.496362	-0.293245	0.0923419	-0.0730505	0.681387	-0.127186	0.473502	-0.193557	0.27272	-0.00342618	0.984657	-0.180064	0.308189	0.398407	0.0196088	0.175976	0.319481	-0.11333	0.523367	-0.315557	0.0690735	-0.000656485	0.99706	-0.313044	0.0714376	0.353853	0.0400649	0.517558	0.00171993	-0.163637	0.355109	-0.692578	5.66372e-06	0.0853165	0.631409
ENSG00000132153	DHX30	22907	bisque4	0.428727	0.01141	-0.0730724	0.681297	0.132722	0.454297	0.631312	6.24142e-05	0.461288	0.00603473	-0.451149	0.00740671	-0.741938	5.12642e-07	-0.211844	0.229069	0.654664	2.66373e-05	0.383914	0.0249916	-0.718167	1.73521e-06	-0.128135	0.470178	-0.203397	0.248603	0.0359941	0.839843	0.601862	0.000166252	0.387451	0.023577	-0.440938	0.00904897	0.0230131	0.897211
ENSG00000188747	NOXA1	10811	bisque4	-0.085871	0.629185	-0.265644	0.128901	-0.149775	0.397862	-0.0159091	0.928843	-0.0573807	0.747199	-0.198388	0.260696	-0.348971	0.0430921	0.233031	0.184736	0.212638	0.227289	0.022979	0.897362	-0.368693	0.0319006	-0.0177779	0.920509	-0.354633	0.0395973	0.212925	0.226648	0.602694	0.00016193	0.0150048	0.932878	-0.567895	0.000459692	-0.00535604	0.976017
ENSG00000163382	APOA1BP	128240	bisque4	0.0710079	0.689848	0.328721	0.0576705	0.374873	0.0289282	0.219689	0.211884	0.0479799	0.787576	0.0156302	0.930087	0.27918	0.109826	-0.635952	5.29922e-05	0.21411	0.224012	-0.28541	0.101798	0.553269	0.000689162	0.279152	0.109864	0.775111	7.37204e-08	0.077998	0.661053	-0.727259	1.10474e-06	0.223149	0.204595	0.710755	2.47599e-06	-0.69595	4.87984e-06
ENSG00000113593	PPWD1	23398	bisque4	-0.137954	0.436542	-0.151986	0.390851	-0.340721	0.0486252	-0.325611	0.0602202	-0.0441973	0.803984	0.0128609	0.942451	-0.228892	0.192881	0.572876	0.000398745	-0.297302	0.0877177	0.180385	0.307311	-0.445371	0.00830149	-0.349517	0.042745	-0.761175	1.7288e-07	0.264341	0.130859	0.704433	3.32469e-06	-0.231008	0.188686	-0.596202	0.000198524	0.529199	0.00129059
ENSG00000159885	ZNF222	7673	bisque4	-0.230112	0.190455	0.0112294	0.949742	-0.569329	0.000441346	0.145086	0.412962	0.233261	0.18429	-0.133122	0.452928	-0.488912	0.00334509	-0.0638706	0.719698	0.0127648	0.942881	0.54705	0.000814104	-0.513512	0.00189599	-0.218714	0.21397	-0.506226	0.00225305	-0.0551488	0.75673	0.559644	0.00057898	0.442498	0.00877974	-0.0985815	0.579115	0.333995	0.0535438
ENSG00000127415	IDUA	3425	bisque4	-0.0706332	0.691404	-0.109818	0.536401	-0.181089	0.305395	0.275684	0.114536	0.0762878	0.668056	-0.194104	0.271341	-0.526564	0.00137851	-0.113039	0.524438	0.573952	0.000386564	0.11908	0.502366	-0.488492	0.00337652	0.0550313	0.757233	-0.186063	0.292075	0.2843	0.103195	0.604431	0.00015322	0.376539	0.028167	-0.482054	0.00389035	-0.18583	0.292691
ENSG00000277972	CISD3	284106	bisque4	0.0949314	0.593311	0.339858	0.0492351	0.445244	0.00832218	0.24889	0.155774	-0.0166172	0.925684	-0.0144718	0.935257	0.323086	0.062354	-0.600963	0.000171041	0.291833	0.0939948	-0.371085	0.030722	0.568418	0.000452927	0.230228	0.190225	0.833457	9.47075e-10	0.0749188	0.673682	-0.764329	1.4328e-07	0.190062	0.28164	0.625817	7.55004e-05	-0.744519	4.45535e-07
ENSG00000169231	THBS3	7059	bisque4	0.0137982	0.938265	-0.251222	0.151808	-0.265985	0.128392	0.0532909	0.764691	0.229454	0.191762	-0.263139	0.132685	-0.563922	0.00051409	0.180722	0.306394	0.0830245	0.640635	0.334912	0.0528509	-0.596296	0.000197949	-0.144659	0.414353	-0.602292	0.000164007	0.216376	0.219031	0.804307	1.00002e-08	0.152215	0.390128	-0.479172	0.00414142	0.267007	0.126877
ENSG00000233429	HOTAIRM1	NA	bisque4	-0.144384	0.41525	-0.0630526	0.723146	-0.447991	0.00788504	0.203884	0.247449	0.370829	0.0308461	-0.314157	0.0703829	-0.584033	0.00028753	-0.171438	0.332317	0.0375489	0.83302	0.538735	0.0010122	-0.475373	0.00449378	-0.0309419	0.862091	-0.495339	0.00289552	0.0986589	0.578816	0.596146	0.000198873	0.452615	0.00719326	-0.0397563	0.823353	0.177383	0.315567
ENSG00000132275	RRP8	23378	bisque4	0.544465	0.000871646	0.00600525	0.973111	0.362388	0.0351854	0.326157	0.059766	0.327058	0.0590232	-0.347585	0.0439847	-0.487055	0.00348576	0.137608	0.437705	0.416685	0.0142283	0.0899074	0.613093	-0.540819	0.00095892	-0.125518	0.47937	-0.25652	0.143074	0.244836	0.162842	0.55949	0.000581458	-0.0432047	0.808304	-0.619264	9.43033e-05	0.0502327	0.777847
ENSG00000196470	SIAH1	6477	bisque4	0.414326	0.014844	0.131942	0.456977	-0.129697	0.464738	0.346862	0.0444559	0.579949	0.000324538	-0.454883	0.00687336	-0.752434	2.86756e-07	0.111036	0.53186	-0.0244998	0.890609	0.694547	5.19302e-06	-0.776237	6.86313e-08	-0.336374	0.0517606	-0.752766	2.81394e-07	-0.00418372	0.981265	0.815679	4.18835e-09	0.165628	0.349205	-0.412742	0.0152698	0.590146	0.000239152
ENSG00000241370	RPP21	79897	bisque4	0.0741176	0.676982	-0.140489	0.428077	-0.101171	0.569138	-0.00464593	0.979196	0.18466	0.295795	-0.268177	0.125157	-0.466506	0.00541803	0.363298	0.0346949	0.0958629	0.589674	0.202048	0.251823	-0.579328	0.000330517	-0.0656791	0.712094	-0.592709	0.00022113	0.202148	0.251585	0.788011	3.16876e-08	-0.0331082	0.852537	-0.671757	1.36223e-05	0.319371	0.0656019
ENSG00000258315	C17orf49	124944	bisque4	-0.0217439	0.902852	-0.191466	0.278035	-0.235343	0.180293	-0.139063	0.432827	0.0753024	0.672103	-0.115626	0.51493	-0.408227	0.0165397	0.454143	0.00697628	-0.0698199	0.694786	0.217274	0.217077	-0.558263	0.000601437	-0.119417	0.501148	-0.684868	7.90371e-06	0.234094	0.182683	0.804111	1.01461e-08	-0.08851	0.618645	-0.650789	3.08327e-05	0.42172	0.012986
ENSG00000172824	CES4A	283848	bisque4	-0.0485967	0.784909	-0.192248	0.276039	-0.358619	0.0372769	0.0586937	0.741609	0.196219	0.266052	-0.127175	0.473538	-0.578522	0.000338436	0.127813	0.471306	0.201482	0.253181	0.320901	0.0642484	-0.615481	0.000106977	-0.127781	0.471416	-0.573634	0.000390131	0.278035	0.111352	0.814904	4.45286e-09	0.24266	0.166732	-0.502623	0.00245032	0.169161	0.338874
ENSG00000131187	F12	2161	bisque4	-0.241859	0.168179	-0.330614	0.0561615	-0.434687	0.0101997	0.0803708	0.651383	0.0361849	0.839005	0.00870158	0.961046	-0.406903	0.0169283	-0.123575	0.486252	0.312341	0.0721107	0.234118	0.182638	-0.401688	0.0185346	0.105373	0.553117	-0.23126	0.18819	0.0951281	0.592542	0.504166	0.00236408	0.416738	0.0142148	-0.232767	0.185248	0.0113136	0.949366
ENSG00000225422	RBMS1P1	NA	bisque4	0.341174	0.0483069	-0.0884892	0.618727	-0.124679	0.482334	0.17015	0.336016	0.346947	0.0444002	-0.314132	0.0704063	-0.55499	0.000657729	0.362976	0.0348679	-0.140188	0.429078	0.572388	0.000404375	-0.701178	3.85801e-06	-0.251148	0.151932	-0.742804	4.8916e-07	-0.177677	0.314752	0.7263	1.15957e-06	-0.0884297	0.618964	-0.52303	0.00150466	0.776273	6.84773e-08
ENSG00000120215	MLANA	2315	bisque4	0.301052	0.0836022	-0.115462	0.515532	0.0151136	0.932393	0.0311945	0.860976	0.131113	0.459836	-0.0666902	0.707854	-0.255605	0.144555	0.358457	0.0373689	-0.164181	0.353489	0.265944	0.128453	-0.386687	0.0238771	-0.131736	0.457687	-0.437768	0.00961802	-0.242091	0.167758	0.38189	0.0258322	-0.216328	0.219134	-0.420255	0.0133378	0.565959	0.000485531
ENSG00000087460	GNAS	2778	bisque4	0.109276	0.538426	0.220472	0.21022	0.317494	0.0672933	0.382619	0.0255268	0.13158	0.458226	-0.0373322	0.83397	0.166137	0.347705	-0.733537	8.0036e-07	0.328955	0.0574824	-0.134156	0.449394	0.440113	0.00919426	0.382798	0.0254521	0.78629	3.55831e-08	-0.0586184	0.741929	-0.708673	2.7307e-06	0.369945	0.0312793	0.730695	9.27102e-07	-0.613698	0.000113466
ENSG00000124570	SERPINB6	5269	bisque4	-0.0233534	0.895699	0.286751	0.100129	0.29337	0.0921962	0.0755675	0.671013	0.0390503	0.826442	-0.0379046	0.83146	0.295175	0.0901193	-0.473938	0.00463339	0.065523	0.712749	-0.284631	0.102776	0.551359	0.000725593	0.41852	0.0137645	0.609931	0.000128347	0.160301	0.365138	-0.622021	8.59347e-05	0.140546	0.427887	0.641512	4.34041e-05	-0.548007	0.000793648
ENSG00000204427	ABHD16A	7920	bisque4	-0.0226712	0.89873	-0.138568	0.434482	-0.513504	0.00189638	0.260146	0.137311	0.438119	0.00955347	-0.282589	0.105377	-0.759814	1.87315e-07	-0.0663754	0.709173	0.105999	0.550749	0.685892	7.56577e-06	-0.739758	5.76402e-07	-0.101664	0.567246	-0.685061	7.83888e-06	0.0229733	0.897387	0.845696	3.06492e-10	0.461803	0.00597138	-0.257048	0.142224	0.355649	0.0389951
ENSG00000164338	UTP15	84135	bisque4	0.431792	0.0107733	0.0441512	0.804185	-0.170828	0.334067	0.425721	0.0120652	0.647827	3.44324e-05	-0.436975	0.00976494	-0.867686	3.09086e-11	0.0112129	0.949816	0.095601	0.590696	0.759116	1.95138e-07	-0.885617	3.43788e-12	-0.192572	0.275215	-0.747766	3.72575e-07	0.0214196	0.904294	0.884812	3.82344e-12	0.299123	0.0856999	-0.383068	0.0253402	0.534381	0.00113196
ENSG00000102158	MAGT1	84061	bisque4	-0.148534	0.401827	0.219886	0.211465	0.0705021	0.691949	0.0772152	0.664255	-0.0705524	0.69174	0.254088	0.147037	0.397895	0.0197809	-0.531222	0.00122648	0.0373567	0.833862	-0.16076	0.363747	0.526058	0.001396	0.229331	0.192005	0.661497	2.0477e-05	-0.0778137	0.661806	-0.769344	1.05646e-07	0.2434	0.165402	0.772851	8.49864e-08	-0.432564	0.0106178
ENSG00000215252	GOLGA8B	23015	bisque4	-0.00970793	0.956544	-0.0813213	0.647525	-0.260436	0.136857	-0.115114	0.516807	0.109489	0.537627	-0.187339	0.288719	-0.449942	0.00758641	0.361904	0.0354487	-0.035857	0.840445	0.210093	0.23303	-0.526306	0.00138739	-0.22996	0.190757	-0.681333	9.17791e-06	0.394905	0.0208116	0.826114	1.78587e-09	-0.024394	0.891078	-0.595422	0.000203384	0.274084	0.11674
ENSG00000001631	KRIT1	889	bisque4	-0.11496	0.51737	-0.260228	0.137183	-0.372794	0.0299015	-0.37825	0.0274021	-0.0524743	0.768197	-0.0157456	0.929572	-0.24838	0.156651	0.727092	1.11411e-06	-0.37078	0.0308703	0.229859	0.190955	-0.493864	0.0029938	-0.330935	0.0559086	-0.8602	7.04753e-11	0.00749435	0.966447	0.785435	3.76771e-08	-0.326993	0.0590762	-0.705289	3.19594e-06	0.683685	8.31083e-06
ENSG00000146350	TBC1D32	221322	bisque4	-0.105251	0.553577	-0.262946	0.132979	-0.357461	0.0379396	-0.277504	0.112066	-0.0577178	0.745763	-0.0631011	0.722941	-0.266874	0.127073	0.601344	0.000168998	-0.242614	0.166814	0.204331	0.246392	-0.442003	0.00886438	-0.16064	0.36411	-0.742884	4.87042e-07	0.0538448	0.762315	0.705826	3.11767e-06	-0.237908	0.175452	-0.637269	5.05636e-05	0.525437	0.00141768
ENSG00000279663	AC104623.1	NA	bisque4	0.391535	0.0220266	0.127467	0.472515	0.0706989	0.691131	0.0777678	0.661994	0.361141	0.0358667	-0.38045	0.0264442	-0.471495	0.00487969	0.436633	0.00982889	-0.184691	0.295711	0.372053	0.0302549	-0.594744	0.0002077	-0.461596	0.00599673	-0.711974	2.33719e-06	0.0670499	0.706348	0.700719	3.93919e-06	-0.210226	0.232729	-0.55782	0.000608783	0.579896	0.000325047
ENSG00000260997	RP4-647J21.1	NA	bisque4	-0.1408	0.427047	-0.198216	0.26112	-0.497138	0.00277952	0.13687	0.440189	0.221286	0.208498	0.137973	0.436477	-0.517887	0.00170626	-0.141131	0.425947	0.175787	0.320009	0.443479	0.00861389	-0.564286	0.000508879	-0.342687	0.0472573	-0.409091	0.01629	0.133787	0.450653	0.582494	0.000301007	0.505784	0.00227648	-0.167682	0.343177	0.186047	0.292119
ENSG00000198246	SLC29A3	55315	bisque4	0.0650177	0.714871	0.17077	0.334233	0.662415	1.9756e-05	-0.127398	0.472757	-0.435633	0.0100181	0.0475987	0.789226	0.644523	3.8893e-05	0.0486684	0.784599	0.108214	0.542405	-0.768194	1.13371e-07	0.660646	2.11664e-05	0.119343	0.501417	0.703197	3.51877e-06	0.200154	0.256389	-0.712213	2.31076e-06	-0.455586	0.00677663	0.0643313	0.717758	-0.539379	0.000995457
ENSG00000144214	LYG1	129530	bisque4	0.0348302	0.844958	-0.184818	0.295374	-0.20994	0.233379	-0.241745	0.168385	0.122385	0.490491	0.0532996	0.764654	-0.331877	0.0551715	0.554312	0.000669959	-0.179852	0.308767	0.189657	0.282687	-0.541776	0.000935291	-0.41088	0.0157832	-0.727166	1.10995e-06	0.184464	0.296316	0.772367	8.75992e-08	-0.173067	0.327673	-0.653793	2.7533e-05	0.504562	0.0023424
ENSG00000196312	HIATL2	NA	bisque4	0.403488	0.0179663	0.0793405	0.655575	-0.097401	0.58369	0.187329	0.288747	0.521421	0.00156536	-0.275866	0.114288	-0.610773	0.000124876	0.244472	0.163489	-0.116733	0.510886	0.596968	0.000193856	-0.687649	7.01673e-06	-0.218393	0.214661	-0.727655	1.08278e-06	-0.04332	0.807802	0.713296	2.19458e-06	0.0215886	0.903542	-0.397117	0.0200448	0.66092	2.09426e-05
ENSG00000104228	TRIM35	23087	bisque4	0.143549	0.417981	0.0385281	0.828729	0.624162	7.99017e-05	-0.297367	0.087645	-0.497871	0.00273339	0.16234	0.358987	0.650873	3.07359e-05	0.406736	0.0169779	-0.0562042	0.752219	-0.736087	7.00369e-07	0.531811	0.00120836	0.0232053	0.896356	0.459626	0.00624349	0.0202629	0.909441	-0.542631	0.000914631	-0.715819	1.94441e-06	-0.217345	0.216925	-0.205565	0.243487
ENSG00000165389	SPTSSA	171546	bisque4	-0.292968	0.0926639	-0.0475922	0.789254	0.19208	0.276466	-0.613989	0.000112383	-0.585299	0.000276855	0.316297	0.0683889	0.877382	9.83464e-12	0.246654	0.159645	-0.478617	0.00419134	-0.688765	6.6867e-06	0.897554	6.43999e-13	0.361286	0.0357871	0.458925	0.00633324	0.0106593	0.95229	-0.764219	1.44229e-07	-0.595961	0.000200017	0.368893	0.0318006	-0.30516	0.0792683
ENSG00000140829	DHX38	9785	bisque4	0.0166376	0.925593	-0.196626	0.265042	-0.221049	0.208998	0.246086	0.160639	0.1339	0.450266	-0.212488	0.227625	-0.595069	0.000205624	0.0434594	0.807195	0.42934	0.0112802	0.271867	0.119849	-0.659928	2.17644e-05	-0.112734	0.525566	-0.412962	0.0152099	0.279681	0.109164	0.770524	9.82304e-08	0.276289	0.113711	-0.59177	0.000227591	0.0775977	0.662689
ENSG00000145029	NICN1	84276	bisque4	-0.15987	0.366445	-0.128415	0.4692	0.051757	0.771282	-0.153527	0.386006	-0.309793	0.07459	-0.111368	0.530627	-0.0352298	0.843201	0.226415	0.197874	0.274873	0.115649	-0.383862	0.0250129	-0.00548169	0.975454	0.297395	0.0876128	-0.0222031	0.90081	0.559225	0.000585719	0.304464	0.0799901	-0.14066	0.427509	-0.532481	0.00118799	-0.319882	0.065148
ENSG00000178404	KIAA1731NL	100653515	bisque4	0.37266	0.0299654	0.00184778	0.991725	-0.107433	0.545337	0.228065	0.194538	0.356504	0.0384938	-0.269463	0.123288	-0.548526	0.000782758	0.264698	0.13032	-0.111941	0.528503	0.573821	0.000388032	-0.682013	8.91939e-06	-0.279058	0.109988	-0.668867	1.53038e-05	-0.241695	0.168477	0.645679	3.72764e-05	-0.0187522	0.916167	-0.443908	0.00854214	0.721073	1.50492e-06
ENSG00000140688	C16orf58	64755	bisque4	-0.152972	0.387747	-0.140329	0.428608	0.0192894	0.913775	-0.148119	0.403158	-0.275902	0.114237	-0.174588	0.323374	-0.118444	0.504668	0.423408	0.0125906	0.22774	0.195193	-0.265608	0.128954	-0.202354	0.251092	0.0593507	0.738817	-0.221036	0.209025	0.451715	0.00732366	0.483732	0.00375028	-0.229121	0.192424	-0.724206	1.28815e-06	-0.0770853	0.664787
ENSG00000139737	SLAIN1	122060	bisque4	-0.238013	0.175256	0.101667	0.567237	0.135652	0.444307	-0.197974	0.261712	-0.321451	0.0637675	0.102267	0.564939	0.494416	0.00295668	-0.0424492	0.811595	-0.0522744	0.769056	-0.452463	0.00721505	0.531047	0.00123193	-0.000639891	0.997134	0.412239	0.0154069	0.050333	0.777414	-0.509013	0.00211011	-0.188447	0.285827	0.282071	0.106044	-0.414121	0.0148984
ENSG00000189190	ZNF600	162966	bisque4	0.38464	0.0246957	0.231668	0.187392	0.163947	0.354185	0.0975926	0.582946	0.355324	0.0391866	-0.439699	0.00926796	-0.384559	0.0247288	0.220224	0.210746	-0.046023	0.796054	0.197739	0.262291	-0.407043	0.0168868	-0.239842	0.171865	-0.497058	0.00278458	0.238734	0.173915	0.533339	0.0011624	-0.115776	0.51438	-0.381504	0.0259951	0.201093	0.254119
ENSG00000274281	RP11-326N17.2	NA	bisque4	0.255863	0.144137	0.0674742	0.704573	-0.312999	0.0714809	0.169521	0.337833	0.506344	0.00224683	-0.211395	0.230081	-0.63848	4.8419e-05	0.160977	0.363091	-0.235538	0.179922	0.730418	9.40404e-07	-0.702193	3.68385e-06	-0.404993	0.0175026	-0.785242	3.81667e-08	-0.163597	0.355228	0.72308	1.36248e-06	0.15869	0.370037	-0.260775	0.136328	0.736735	6.76846e-07
ENSG00000250548	RP11-47I22.2	101927780	bisque4	-0.178028	0.31378	-0.264329	0.130876	-0.571901	0.00041008	0.0634291	0.721558	0.16284	0.35749	-0.00265417	0.988114	-0.473769	0.00465003	0.0346786	0.845625	-0.0962089	0.588325	0.56246	0.000535511	-0.542238	0.000924077	-0.161258	0.362242	-0.57321	0.000394928	-0.0385166	0.828779	0.585361	0.000276336	0.289919	0.0962704	-0.147823	0.404107	0.448916	0.0077423
ENSG00000110911	SLC11A2	4891	bisque4	0.062837	0.724056	-0.176599	0.317745	-0.184877	0.295219	-0.182156	0.302508	0.109024	0.539368	-0.244368	0.163674	-0.376435	0.028214	0.552301	0.00070741	-0.177196	0.316083	0.232618	0.185538	-0.541636	0.00093872	-0.134161	0.449377	-0.759548	1.90259e-07	0.135675	0.444229	0.806028	8.79796e-09	-0.22037	0.210435	-0.659123	2.24535e-05	0.485277	0.00362523
ENSG00000237399	PITRM1-AS1	100507034	bisque4	0.0598668	0.736625	-0.252138	0.150271	-0.268099	0.125271	-0.0595006	0.73818	0.117893	0.506668	-0.229908	0.190859	-0.440974	0.00904279	0.445818	0.00822919	-0.0691119	0.697735	0.32887	0.0575505	-0.614485	0.000110559	-0.228458	0.19375	-0.73704	6.66023e-07	-0.0131675	0.941082	0.796227	1.79457e-08	-0.121109	0.495058	-0.637278	5.0547e-05	0.512997	0.0019195
ENSG00000011021	CLCN6	1185	bisque4	0.0614268	0.730015	-0.337605	0.0508566	-0.381507	0.0259937	0.107047	0.546792	0.259186	0.13882	-0.151206	0.393315	-0.660242	2.15013e-05	0.277122	0.112582	0.120948	0.495638	0.504898	0.00232412	-0.818351	3.38468e-09	-0.233357	0.184104	-0.743303	4.76094e-07	-0.0243999	0.891052	0.927026	3.51289e-15	0.182834	0.300681	-0.638566	4.82697e-05	0.506247	0.00225197
ENSG00000103544	C16orf62	57020	bisque4	-0.458637	0.00637051	-0.0175547	0.921504	0.179344	0.310158	-0.524093	0.00146567	-0.715831	1.94329e-06	0.437273	0.00970947	0.89182	1.47538e-12	0.140869	0.426815	-0.202735	0.250181	-0.798954	1.47744e-08	0.867399	3.19304e-11	0.242959	0.166193	0.649584	3.22541e-05	0.0419166	0.813918	-0.792402	2.34583e-08	-0.428052	0.0115544	0.265429	0.129222	-0.461216	0.00604364
ENSG00000165675	ENOX2	10495	bisque4	-0.00326803	0.985365	0.215191	0.221626	0.355337	0.039179	-0.0768668	0.665682	-0.26866	0.124452	0.0388432	0.827349	0.578589	0.000337766	-0.131167	0.459651	-0.172117	0.330376	-0.377714	0.0276397	0.681212	9.22492e-06	0.338593	0.0501406	0.605876	0.000146299	-0.204228	0.246635	-0.809081	6.98872e-09	-0.278303	0.110994	0.499675	0.00262277	-0.283819	0.103805
ENSG00000185324	CDK10	8558	bisque4	-0.0130969	0.941397	-0.227246	0.19619	-0.0515092	0.772347	-0.0662822	0.709564	-0.0689327	0.698482	-0.287323	0.0994243	-0.349624	0.0426771	0.430624	0.0110124	0.20432	0.246418	-0.0307555	0.862913	-0.449285	0.00768597	-0.0732988	0.680361	-0.466428	0.00542674	0.291108	0.0948512	0.725724	1.19373e-06	-0.160441	0.364712	-0.798206	1.55888e-08	0.120701	0.496526
ENSG00000143458	GABPB2	126626	bisque4	0.0218463	0.902397	-0.295058	0.0902531	-0.368112	0.0321923	-0.00763055	0.965837	0.135059	0.446318	-0.177481	0.315295	-0.496894	0.002795	0.42908	0.0113352	-0.0514784	0.77248	0.41468	0.0147501	-0.65581	2.54993e-05	-0.208624	0.236391	-0.766552	1.2529e-07	-0.0692064	0.697341	0.811952	5.6065e-09	-0.0370359	0.83527	-0.645167	3.79839e-05	0.561029	0.000557229
ENSG00000181666	HKR1	284459	bisque4	0.231497	0.187726	0.0266637	0.881012	0.0223241	0.900272	-0.0672666	0.705441	0.155939	0.378499	-0.238199	0.174909	-0.330739	0.0560628	0.48101	0.00397974	-0.115482	0.515455	0.175207	0.321635	-0.46657	0.00541074	-0.346505	0.0446904	-0.613261	0.000115109	0.185524	0.293501	0.646524	3.61324e-05	-0.277613	0.111919	-0.609667	0.000129453	0.405457	0.0173616
ENSG00000143570	SLC39A1	27173	bisque4	-0.409169	0.0162676	-0.181098	0.305372	0.1435	0.418142	-0.386975	0.0237636	-0.681979	8.93211e-06	0.521096	0.00157786	0.8185	3.34427e-09	-0.027748	0.87621	-0.013564	0.939311	-0.735974	7.04527e-07	0.807276	8.01139e-09	0.338559	0.0501652	0.771861	9.04075e-08	-0.0753928	0.671732	-0.841961	4.36809e-10	-0.260717	0.13642	0.328248	0.0580526	-0.517995	0.00170182
ENSG00000172890	NADSYN1	55191	bisque4	-0.0840618	0.636453	-0.206915	0.240337	-0.140465	0.428156	0.110076	0.535436	0.0268646	0.880122	-0.22592	0.198883	-0.424302	0.0123852	0.0253885	0.886666	0.419152	0.0136077	0.0238948	0.893294	-0.386109	0.024106	0.0364236	0.837957	-0.237275	0.176638	0.341589	0.0480178	0.600968	0.000171016	0.194964	0.269182	-0.506133	0.00225795	-0.190444	0.280656
ENSG00000100445	SDR39U1	56948	bisque4	0.06924	0.697201	-0.123939	0.484959	-0.0946578	0.594381	-0.075226	0.672418	0.138864	0.433494	-0.271564	0.120277	-0.400566	0.0188964	0.312617	0.0718462	0.0381366	0.830444	0.122229	0.491048	-0.43339	0.0104534	-0.0480149	0.787425	-0.544523	0.00087032	0.297587	0.0873991	0.725246	1.22275e-06	-0.0855021	0.630664	-0.558225	0.000602056	0.154239	0.383782
ENSG00000114933	INO80D	54891	bisque4	0.368061	0.0322184	0.0255956	0.885747	-0.228112	0.194444	0.267811	0.125693	0.586321	0.00026849	-0.276266	0.113742	-0.746447	4.00785e-07	0.193601	0.27261	-0.0873635	0.623215	0.75592	2.34946e-07	-0.864504	4.41398e-11	-0.391126	0.022178	-0.840264	5.11581e-10	-0.1228	0.489009	0.855208	1.1899e-10	0.165576	0.349357	-0.430231	0.0110938	0.77305	8.39365e-08
ENSG00000204172	AGAP10	642517	bisque4	-0.0129194	0.94219	-0.254494	0.146369	-0.249686	0.154412	-0.11292	0.524881	0.103201	0.561372	-0.0752007	0.672522	-0.420748	0.0132185	0.464852	0.00560734	-0.0435472	0.806813	0.243678	0.164904	-0.586319	0.000268509	-0.177064	0.316451	-0.690231	6.27506e-06	0.222077	0.206834	0.797155	1.68018e-08	-0.0599965	0.736075	-0.670915	1.40941e-05	0.462169	0.00592658
ENSG00000131398	KCNC3	3748	bisque4	0.344691	0.0458954	0.0424239	0.811706	0.102534	0.563918	0.582726	0.000298943	0.418652	0.0137318	-0.348713	0.0432571	-0.697846	4.48388e-06	-0.210263	0.232644	0.668386	1.56013e-05	0.316738	0.0679833	-0.689416	6.50111e-06	-0.164294	0.353155	-0.172694	0.328733	0.215648	0.220622	0.589343	0.000245062	0.449926	0.00758895	-0.472553	0.00477163	-0.0386055	0.82839
ENSG00000215788	TNFRSF25	8718	bisque4	-0.0699936	0.694064	0.0565807	0.750611	-0.0320391	0.85725	-0.00127449	0.994292	-0.00299228	0.9866	-0.136724	0.440681	-0.317894	0.0669303	0.200111	0.256495	0.278181	0.111157	-0.0788073	0.657749	-0.369748	0.0313764	-0.237445	0.17632	-0.295074	0.0902346	0.508477	0.00213698	0.586109	0.000270205	0.0611587	0.73115	-0.594306	0.000210527	-0.0961787	0.588443
ENSG00000054277	OPN3	23596	bisque4	0.0162344	0.927392	0.408459	0.0164723	0.464936	0.00559756	-0.0171796	0.923176	-0.15156	0.392197	0.0939591	0.597118	0.567505	0.000464794	-0.312694	0.0717725	0.0125923	0.943651	-0.489024	0.00333676	0.705077	3.22744e-06	0.0379139	0.831419	0.747022	3.88268e-07	0.0289594	0.87085	-0.853747	1.38189e-10	-0.106778	0.547807	0.563476	0.000520544	-0.552778	0.000698362
ENSG00000173064	HECTD4	283450	bisque4	0.340794	0.0485733	-0.155622	0.379482	-0.0663725	0.709185	0.313043	0.0714391	0.28314	0.10467	-0.164258	0.353262	-0.491009	0.00319222	0.256984	0.142326	0.11302	0.524509	0.507993	0.00216146	-0.70349	3.47183e-06	-0.291308	0.0946144	-0.498251	0.00270975	-0.399672	0.0191887	0.546708	0.000821519	0.023316	0.895865	-0.530908	0.00123625	0.718499	1.70739e-06
ENSG00000115977	AAK1	22848	bisque4	0.239921	0.171719	-0.0995135	0.575515	-0.299567	0.0852138	0.253034	0.148778	0.393567	0.0212871	-0.330183	0.0565025	-0.653611	2.77232e-05	0.133474	0.451723	-0.0703132	0.692734	0.688135	6.87126e-06	-0.710267	2.53366e-06	-0.0955749	0.590797	-0.716099	1.91833e-06	-0.184514	0.296183	0.728478	1.03846e-06	0.150005	0.397127	-0.354384	0.0397457	0.676423	1.12582e-05
ENSG00000180667	YOD1	55432	bisque4	0.499205	0.00265122	0.121167	0.494852	0.0229432	0.897521	0.335325	0.0525409	0.687887	6.94502e-06	-0.431282	0.0108772	-0.776085	6.93018e-08	0.0793362	0.655593	0.117371	0.508562	0.569303	0.000441679	-0.785316	3.79791e-08	-0.282865	0.105022	-0.68337	8.42243e-06	0.151396	0.392714	0.837788	6.42121e-10	0.201531	0.253065	-0.435568	0.0100305	0.425535	0.0121068
ENSG00000091536	MYO15A	51168	bisque4	-0.0997899	0.57445	-0.102415	0.564374	-0.316487	0.068214	-0.132858	0.453833	0.0351849	0.843398	-0.114245	0.519998	-0.40689	0.0169322	0.41667	0.0142323	-0.129706	0.464706	0.248522	0.156406	-0.517695	0.00171422	-0.236828	0.177479	-0.695892	4.89232e-06	0.29765	0.087329	0.778217	6.04659e-08	-0.0449016	0.800923	-0.603665	0.000157006	0.430868	0.0109621
ENSG00000152284	TCF7L1	83439	bisque4	0.240784	0.170137	0.116693	0.511031	0.0695252	0.696013	0.0783713	0.659528	0.350156	0.0423408	-0.230827	0.189042	-0.44395	0.00853521	0.19119	0.278741	0.0606026	0.733505	0.20495	0.244932	-0.499018	0.00266261	-0.221261	0.208551	-0.484546	0.00368393	0.520976	0.00158254	0.626289	7.42868e-05	0.0284316	0.873185	-0.439635	0.00927932	0.191887	0.27696
ENSG00000259407	RP11-158M2.3	NA	bisque4	-0.0119727	0.94642	-0.125747	0.478559	-0.173299	0.327014	-0.150141	0.396694	0.0708647	0.690443	-0.180368	0.307358	-0.2412	0.169378	0.35543	0.0391243	-0.129533	0.46531	0.164528	0.35246	-0.317009	0.0677357	-0.0477613	0.788522	-0.49294	0.00305678	-0.0954785	0.591174	0.541166	0.000950302	-0.150355	0.396016	-0.392143	0.0218034	0.309613	0.0747675
ENSG00000233175	CTD-2020K17.3	NA	bisque4	-0.003743	0.983239	-0.17664	0.317629	-0.37045	0.0310312	-0.023914	0.893209	0.240709	0.170274	-0.122718	0.489303	-0.558101	0.000604104	0.382692	0.0254964	-0.0398237	0.823058	0.443329	0.00863915	-0.740793	5.4527e-07	-0.274613	0.116008	-0.799841	1.38603e-08	0.0704695	0.692085	0.910326	8.40473e-14	0.0847851	0.633543	-0.631986	6.09569e-05	0.563093	0.000526146
ENSG00000180509	KCNE1	3753	bisque4	0.0193915	0.91332	-0.436894	0.00978015	-0.322858	0.0625499	-0.0625443	0.725291	-0.0189367	0.915346	-0.123637	0.486029	-0.398217	0.0196724	0.392721	0.0215925	0.0250732	0.888064	0.266563	0.127534	-0.523726	0.00147905	0.143044	0.419639	-0.598673	0.000183807	-0.0445991	0.802237	0.702406	3.64829e-06	-0.0875302	0.622549	-0.621723	8.6805e-05	0.410251	0.0159597
ENSG00000240857	RDH14	57665	bisque4	0.250812	0.152499	-0.0171661	0.923236	0.49674	0.00280484	-0.339203	0.0497021	-0.268255	0.125043	0.299442	0.0853509	0.577225	0.000351522	0.28362	0.104057	-0.261663	0.134952	-0.532992	0.0011727	0.504466	0.00234761	0.0220535	0.901475	0.325839	0.0600303	-0.0420522	0.813327	-0.526271	0.00138859	-0.602368	0.000163613	0.0434678	0.807158	-0.0934771	0.599009
ENSG00000147905	ZCCHC7	84186	bisque4	-0.331416	0.0555311	-0.103316	0.560933	0.050142	0.778238	-0.760959	1.75106e-07	-0.550712	0.000738313	0.369301	0.0315975	0.791578	2.4832e-08	0.593288	0.000217236	-0.683896	8.23696e-06	-0.545544	0.000847206	0.660885	2.09708e-05	0.0516414	0.771779	0.0796261	0.654412	-0.0717885	0.68661	-0.453056	0.00713005	-0.73836	6.21008e-07	0.0753808	0.671781	0.0966238	0.58671
ENSG00000223396	RP11-134G8.5	NA	bisque4	0.00375957	0.983164	-0.250124	0.153666	-0.208302	0.237131	-0.186669	0.29048	0.00245491	0.989006	-0.126523	0.47583	-0.216132	0.219562	0.450903	0.00744307	-0.195145	0.268729	0.177974	0.31393	-0.381299	0.0260819	-0.119237	0.501799	-0.601618	0.000167541	0.0487182	0.784384	0.562392	0.000536523	-0.238603	0.174158	-0.474847	0.0045445	0.39534	0.0206592
ENSG00000148248	SURF4	6836	bisque4	0.0274104	0.877705	0.0859026	0.629058	0.216313	0.219167	0.392696	0.0216015	0.0585266	0.74232	0.0210656	0.905869	0.16638	0.346991	-0.772497	8.68889e-08	0.424832	0.012265	-0.13114	0.459742	0.404499	0.0176536	0.357314	0.0380243	0.80855	7.27641e-09	-0.0866037	0.626251	-0.692185	5.7621e-06	0.437345	0.00969622	0.703172	3.52275e-06	-0.632003	6.09208e-05
ENSG00000166619	BLCAP	10904	bisque4	0.287772	0.0988726	0.0842958	0.635511	0.714031	2.11891e-06	0.0262779	0.882722	-0.312117	0.0723258	0.0038867	0.982595	0.515235	0.00181917	-0.040654	0.81943	0.218639	0.214133	-0.661112	2.07869e-05	0.558508	0.000597393	0.250871	0.152401	0.709325	2.64844e-06	0.0940277	0.596849	-0.672703	1.31096e-05	-0.397897	0.0197802	0.064346	0.717696	-0.521144	0.001576
ENSG00000161912	ADCY10P1	221442	bisque4	0.0717507	0.686767	-0.0571123	0.748343	-0.112677	0.525778	-0.14416	0.415983	0.118814	0.503328	-0.228726	0.193213	-0.356592	0.0384429	0.474351	0.00459278	-0.0653204	0.7136	0.123326	0.487138	-0.490799	0.00320726	-0.20827	0.237204	-0.662043	2.00454e-05	0.282575	0.105394	0.760358	1.81422e-07	-0.168317	0.341325	-0.657782	2.36446e-05	0.301626	0.0829864
ENSG00000219200	RNASEK	440400	bisque4	0.0913729	0.607294	-0.102189	0.565237	-0.217329	0.216959	0.0328222	0.853797	0.272959	0.11831	-0.28907	0.0972927	-0.573538	0.00039121	0.319134	0.0658137	0.0264412	0.881999	0.352965	0.0406019	-0.659056	2.25113e-05	-0.247368	0.158402	-0.711372	2.40485e-06	0.127081	0.473869	0.880875	6.3572e-12	0.0512965	0.773263	-0.611941	0.000120204	0.365209	0.0336831
ENSG00000213190	MLLT11	10962	bisque4	0.0419956	0.813573	-0.0314374	0.859904	-0.221475	0.208099	-0.0159718	0.928563	0.180194	0.307833	-0.266608	0.127466	-0.52311	0.00150168	0.397572	0.0198902	0.00423277	0.981046	0.292467	0.0932496	-0.642391	4.20404e-05	-0.242131	0.167687	-0.730486	9.37091e-07	0.264841	0.130104	0.886661	2.99203e-12	-0.00334479	0.985022	-0.689991	6.34077e-06	0.39613	0.0203841
ENSG00000108785	HSD17B1P1	NA	bisque4	0.0236203	0.894513	-0.0217664	0.902752	0.0947083	0.594183	-0.0640677	0.718868	-0.055226	0.7564	-0.172073	0.3305	-0.142805	0.420424	0.380417	0.0264585	0.167171	0.34467	-0.138296	0.435393	-0.263371	0.13233	-0.182721	0.300983	-0.278703	0.110461	0.285196	0.102066	0.418275	0.0138257	-0.191586	0.277729	-0.631058	6.297e-05	0.0839729	0.636811
ENSG00000111669	TPI1	7167	bisque4	-0.0203081	0.90924	0.176657	0.317581	0.235261	0.180449	0.265045	0.129798	0.016168	0.927688	0.0516184	0.771878	0.272481	0.118982	-0.704179	3.36363e-06	0.224437	0.201927	-0.180179	0.307874	0.531652	0.00121322	0.30712	0.0772623	0.796841	1.71813e-08	-0.0989672	0.577624	-0.769816	1.0262e-07	0.322321	0.0630125	0.797983	1.58398e-08	-0.608916	0.000132647
ENSG00000222009	BTBD19	149478	bisque4	-0.111078	0.531705	-0.232339	0.18608	-0.61835	9.72363e-05	0.157996	0.372161	0.300574	0.0841186	-0.111195	0.531269	-0.710626	2.49114e-06	0.0687532	0.699231	0.0536262	0.763252	0.67705	1.09705e-05	-0.794526	2.023e-08	-0.132605	0.4547	-0.743891	4.61077e-07	-0.0396596	0.823776	0.879013	8.03473e-12	0.417151	0.0141095	-0.376272	0.0282876	0.526451	0.00138239
ENSG00000262973	NA	NA	bisque4	0.0705112	0.691911	-0.228875	0.192916	-0.455645	0.00676861	0.114673	0.518421	0.273169	0.118016	-0.173649	0.326025	-0.544807	0.000863845	0.222672	0.205589	-0.169264	0.338575	0.664013	1.85561e-05	-0.679571	9.88051e-06	-0.260021	0.137507	-0.762005	1.64596e-07	-0.287586	0.0991008	0.728351	1.04515e-06	0.12388	0.485167	-0.343376	0.0467854	0.710555	2.49951e-06
ENSG00000178999	AURKB	9212	bisque4	0.110956	0.53216	-0.172008	0.330687	-0.254279	0.146722	0.188765	0.284998	0.237888	0.175491	-0.35305	0.0405505	-0.542802	0.000910557	0.120688	0.49657	0.114642	0.518537	0.409555	0.0161573	-0.545763	0.000842313	-0.00413928	0.981464	-0.533732	0.00115082	-0.0800359	0.652745	0.674876	1.19972e-05	0.117819	0.506934	-0.41295	0.0152133	0.283319	0.104441
ENSG00000064726	BTBD1	53339	bisque4	0.129974	0.463776	0.343129	0.0469544	0.14657	0.40815	-0.0300847	0.865876	0.104321	0.557107	-0.145721	0.4109	0.312788	0.0716821	-0.21081	0.231404	-0.446039	0.00819359	0.0398756	0.822832	0.440654	0.00909888	0.18509	0.294652	0.186164	0.291808	-0.167181	0.34464	-0.534489	0.00112884	-0.139	0.433037	0.697068	4.64269e-06	-0.0229503	0.897489
ENSG00000174606	ANGEL2	90806	bisque4	0.0264797	0.881828	-0.274288	0.116458	-0.312608	0.071855	-0.193883	0.271899	0.0651118	0.714476	-0.073383	0.680014	-0.399884	0.019119	0.612452	0.000118207	-0.247578	0.158036	0.33798	0.0505839	-0.62276	8.38058e-05	-0.329242	0.0572521	-0.854407	1.29193e-10	0.0122739	0.945074	0.851777	1.68656e-10	-0.228813	0.193038	-0.710232	2.53779e-06	0.687232	7.14362e-06
ENSG00000072071	LPHN1	22859	bisque4	-0.00436705	0.980444	-0.168297	0.341384	-0.144405	0.415184	0.00568741	0.974534	-0.00361958	0.983791	-0.120984	0.495509	-0.435457	0.0100517	0.430081	0.0111249	0.224822	0.201134	0.11494	0.517444	-0.628477	6.88863e-05	-0.185234	0.29427	-0.54511	0.000856954	0.297615	0.0873677	0.803485	1.06256e-08	-0.0355746	0.841686	-0.843808	3.67005e-10	0.294392	0.0910157
ENSG00000204599	TRIM39	56658	bisque4	-0.0679	0.702793	-0.109221	0.538632	-0.609527	0.000130044	0.261421	0.135325	0.411363	0.0156485	-0.222168	0.206645	-0.757663	2.12399e-07	-0.0420972	0.81313	0.0628008	0.724208	0.764948	1.38045e-07	-0.796397	1.77311e-08	-0.201209	0.253839	-0.737542	6.48563e-07	-0.02089	0.90665	0.84821	2.40169e-10	0.482544	0.00384899	-0.267996	0.125422	0.486512	0.00352787
ENSG00000273599	RP11-59C5.3	NA	bisque4	-0.0345245	0.846302	-0.170254	0.335716	-0.25892	0.13924	-0.103537	0.560089	0.0270977	0.87909	-0.00844189	0.962207	-0.39138	0.0220838	0.513658	0.0018894	0.0182255	0.918514	0.214718	0.222668	-0.63249	5.98885e-05	-0.424222	0.0124036	-0.674783	1.20429e-05	0.10015	0.573063	0.7974	1.65115e-08	-0.093428	0.599202	-0.779134	5.6994e-08	0.490257	0.00324635
ENSG00000013583	HEBP1	50865	bisque4	-0.288142	0.0984209	-0.0315278	0.859505	0.243989	0.164349	-0.287198	0.0995779	-0.523516	0.00148672	0.261601	0.135047	0.746996	3.88809e-07	-0.179083	0.310874	-0.0561829	0.752309	-0.681208	9.22615e-06	0.854426	1.28943e-10	0.351238	0.0416644	0.769119	1.0712e-07	0.0374992	0.833238	-0.852881	1.50897e-10	-0.221319	0.208428	0.505712	0.00228033	-0.667867	1.59283e-05
ENSG00000155287	SLC25A28	81894	bisque4	0.00888652	0.960218	-0.18073	0.306372	-0.585415	0.000275893	0.414802	0.0147179	0.518284	0.00168989	-0.132314	0.4557	-0.817048	3.75674e-09	-0.294764	0.0905886	0.244358	0.163692	0.799488	1.42177e-08	-0.780958	5.06311e-08	-0.169556	0.337732	-0.547716	0.00079983	-0.133002	0.453338	0.73854	6.15102e-07	0.692159	5.76872e-06	-0.0960145	0.589083	0.320732	0.0643968
ENSG00000227603	RP11-165J3.6	NA	bisque4	-0.208827	0.235924	-0.193667	0.272444	-0.175062	0.322043	-0.17437	0.323987	-0.183358	0.299272	-0.000960184	0.9957	-0.0856253	0.63017	0.406134	0.0171576	0.0664928	0.708681	-0.0500233	0.778749	-0.267614	0.125982	-0.116464	0.511866	-0.308294	0.0760797	-0.00250053	0.988802	0.408276	0.0165254	-0.147457	0.405285	-0.533494	0.00115782	0.17466	0.323171
ENSG00000104852	SNRNP70	6625	bisque4	0.0151362	0.932292	-0.148596	0.401629	-0.124498	0.482974	0.0544332	0.759793	0.0853171	0.631406	-0.26545	0.129191	-0.493165	0.00304135	0.274325	0.116407	0.293304	0.0922728	0.111163	0.531391	-0.562416	0.000536165	-0.117936	0.506511	-0.486625	0.00351909	0.325333	0.0604519	0.796721	1.7329e-08	0.0540856	0.761283	-0.72499	1.23858e-06	0.0903696	0.611262
ENSG00000261428	RP11-16P6.1	NA	bisque4	0.359795	0.0366138	0.184205	0.297008	0.0244791	0.8907	0.189677	0.282634	0.378237	0.0274078	-0.327588	0.0585894	-0.529377	0.00128484	0.177879	0.314193	0.0838363	0.637361	0.350587	0.0420704	-0.589066	0.000247136	-0.27662	0.11326	-0.523253	0.00149638	0.146183	0.409402	0.646257	3.64905e-05	0.0482365	0.786466	-0.452558	0.00720142	0.323734	0.0618011
ENSG00000130714	POMT1	10585	bisque4	-0.135628	0.444389	-0.163461	0.355635	-0.270678	0.121541	0.073029	0.681476	0.0785452	0.658818	-0.216536	0.218682	-0.476443	0.00439202	0.160381	0.364894	0.236443	0.178206	0.205252	0.244221	-0.52747	0.00134772	-0.0872394	0.62371	-0.452814	0.00716468	0.196436	0.265513	0.718567	1.70175e-06	0.189861	0.282159	-0.549546	0.000761729	0.134024	0.449843
ENSG00000158428	CATIP	375307	bisque4	-0.195515	0.267803	-0.277139	0.112558	-0.529268	0.00128836	0.154816	0.381983	0.158096	0.371857	-0.11241	0.526764	-0.598252	0.000186244	-0.105393	0.553039	0.212963	0.226563	0.456813	0.00661071	-0.582157	0.000304035	-0.0667242	0.707712	-0.461321	0.00603073	0.0404601	0.820277	0.704652	3.29126e-06	0.447507	0.00796062	-0.256331	0.143379	0.157489	0.373719
ENSG00000184402	SS18L1	26039	bisque4	0.112608	0.526032	-0.147263	0.405913	-0.163512	0.355483	-0.173706	0.325862	0.0297845	0.867203	-0.158518	0.370565	-0.276047	0.114041	0.647771	3.45044e-05	-0.179779	0.308967	0.208221	0.237317	-0.52224	0.0015342	-0.346684	0.0445728	-0.727653	1.08287e-06	-0.141791	0.423765	0.700113	4.04882e-06	-0.330072	0.0565899	-0.725873	1.18483e-06	0.586445	0.000267487
ENSG00000227740	RP11-318C24.2	NA	bisque4	0.156623	0.376385	0.0314375	0.859903	-0.207751	0.238401	0.118599	0.504106	0.340895	0.0485028	-0.21932	0.212672	-0.490806	0.00320672	0.107917	0.54352	-0.0568422	0.749495	0.475967	0.00443697	-0.558294	0.000600911	-0.0628418	0.724036	-0.568985	0.000445693	0.225636	0.199463	0.600401	0.000174102	0.132004	0.456764	-0.239383	0.172712	0.437429	0.0096805
ENSG00000172243	CLEC7A	64581	bisque4	-0.104808	0.555256	-0.0430871	0.808816	-0.589386	0.000244743	0.136473	0.441529	0.390936	0.0222487	-0.22894	0.192786	-0.677086	1.09543e-05	-0.0494452	0.781244	-0.079765	0.653847	0.681585	9.08128e-06	-0.654057	2.7258e-05	-0.246723	0.159523	-0.732164	8.59465e-07	0.074321	0.676144	0.800192	1.35134e-08	0.431019	0.010931	-0.156023	0.378237	0.381575	0.0259649
ENSG00000101911	PRPS2	5634	bisque4	-0.334057	0.0534968	-0.141653	0.424221	0.218877	0.21362	-0.509281	0.0020968	-0.631339	6.23537e-05	0.41863	0.0137373	0.88151	5.86324e-12	0.10351	0.560192	-0.233869	0.183116	-0.756602	2.25871e-07	0.885157	3.65336e-12	0.368297	0.0320994	0.651508	3.00114e-05	0.0182292	0.918498	-0.83939	5.5454e-10	-0.461425	0.0060178	0.377234	0.0278541	-0.470809	0.00495091
ENSG00000111271	ACAD10	80724	bisque4	-0.163485	0.355562	-0.346766	0.0445188	-0.0535022	0.763784	-0.385571	0.0243206	-0.356817	0.0383118	-0.0144954	0.935152	0.053218	0.765004	0.629636	6.61709e-05	-0.0963881	0.587627	-0.249183	0.155272	-0.0981516	0.580779	0.106424	0.549142	-0.311181	0.0732314	0.0826663	0.642082	0.390189	0.0225282	-0.462617	0.00587217	-0.637591	4.99847e-05	0.190223	0.281225
ENSG00000268366	CTC-492K19.4	NA	bisque4	-0.0754245	0.671601	-0.1926	0.275144	-0.312867	0.0716073	0.0910756	0.608469	0.233335	0.184147	-0.133354	0.452134	-0.509909	0.00206584	0.0174295	0.922062	0.225498	0.199746	0.305006	0.0794273	-0.532823	0.00117773	-0.142106	0.422725	-0.425904	0.0120244	0.191725	0.277374	0.662266	1.98716e-05	0.321513	0.0637137	-0.349633	0.0426712	0.125707	0.478703
ENSG00000100888	CHD8	57680	bisque4	0.346555	0.0446573	-0.098223	0.580503	-0.196847	0.264493	0.328148	0.0581341	0.474554	0.004573	-0.164489	0.352575	-0.71882	1.68088e-06	0.192357	0.275761	0.149779	0.397849	0.66546	1.75268e-05	-0.917347	2.40121e-14	-0.349285	0.0428925	-0.699189	4.22131e-06	-0.164713	0.351911	0.813829	4.84474e-09	0.20606	0.242329	-0.560057	0.000572413	0.700905	3.90619e-06
ENSG00000260693	AC026150.8	NA	bisque4	0.298293	0.0866153	0.124401	0.483319	-0.217053	0.217556	0.262316	0.133944	0.499941	0.0026068	-0.40983	0.0160789	-0.668085	1.57901e-05	0.19429	0.270872	-0.107242	0.546059	0.690682	6.15321e-06	-0.746639	3.96569e-07	-0.314254	0.070292	-0.774512	7.65656e-08	-0.164171	0.35352	0.764907	1.38385e-07	0.11296	0.524733	-0.369347	0.0315748	0.696091	4.8494e-06
ENSG00000226321	AC104809.3	NA	bisque4	0.126759	0.475001	0.123986	0.48479	-0.0265226	0.881638	0.177556	0.315087	0.188034	0.286903	-0.192187	0.276195	-0.504078	0.00236891	0.184748	0.295561	0.293559	0.0919769	0.173982	0.325081	-0.5671	0.000470153	-0.233691	0.183459	-0.408881	0.0163504	0.386515	0.0239447	0.666154	1.70513e-05	0.126874	0.474594	-0.636551	5.18755e-05	0.159825	0.36658
ENSG00000162664	ZNF326	284695	bisque4	0.466792	0.00538579	0.0339917	0.848647	-0.183079	0.300022	0.431599	0.0108126	0.707331	2.90732e-06	-0.394481	0.0209614	-0.877902	9.22418e-12	0.0333508	0.851469	0.0749877	0.673398	0.814112	4.73848e-09	-0.923883	6.74185e-15	-0.308281	0.0760928	-0.786439	3.52294e-08	-0.0813168	0.647544	0.883346	4.6299e-12	0.311707	0.0727217	-0.3878	0.0234413	0.62977	6.58631e-05
ENSG00000167874	TMEM88	92162	bisque4	-0.249173	0.155288	-0.035292	0.842928	-0.644916	3.83362e-05	0.283873	0.103736	0.334931	0.0528367	-0.12747	0.472504	-0.683338	8.43412e-06	-0.245877	0.161006	0.1912	0.278717	0.665434	1.75444e-05	-0.654411	2.68951e-05	-0.189623	0.282775	-0.49525	0.00290138	-0.0768496	0.665752	0.680564	9.47866e-06	0.66748	1.61757e-05	-0.106146	0.550193	0.262115	0.134254
ENSG00000123136	DDX39A	10212	bisque4	-0.271005	0.121073	-0.131999	0.456781	-0.603559	0.000157536	0.187642	0.287926	0.281775	0.106426	0.140947	0.426559	-0.600148	0.000175491	-0.187395	0.288573	0.262337	0.133912	0.532548	0.00118598	-0.643686	4.0102e-05	-0.211088	0.230774	-0.409257	0.0162425	0.00145162	0.993499	0.642083	4.25142e-05	0.659307	2.22944e-05	-0.172397	0.329578	0.23504	0.180871
ENSG00000261455	LINC01003	NA	bisque4	-0.343641	0.0466054	-0.152622	0.388847	-0.21638	0.219021	0.0225915	0.899084	-0.155238	0.380673	0.252993	0.148847	0.25701	0.142284	-0.41743	0.0140385	0.118587	0.50415	-0.0907911	0.609594	0.358155	0.0375413	0.191511	0.27792	0.447651	0.007938	-0.262929	0.133006	-0.488272	0.00339302	0.326145	0.0597762	0.524186	0.00146231	-0.300356	0.0843545
ENSG00000275070	Metazoa_SRP	NA	bisque4	-0.120951	0.495627	0.017876	0.920072	-0.512772	0.00192986	0.208073	0.237657	0.386709	0.0238682	-0.00598491	0.973202	-0.620811	8.95219e-05	-0.125726	0.478634	0.142403	0.421749	0.58047	0.000319591	-0.669385	1.49892e-05	-0.246849	0.159303	-0.529468	0.0012819	0.106501	0.54885	0.676823	1.1074e-05	0.569748	0.000436119	-0.171459	0.332256	0.301243	0.083397
ENSG00000173209	AHSA2	130872	bisque4	0.041975	0.813663	-0.184974	0.294961	-0.263253	0.13251	-0.125288	0.48018	0.180261	0.307651	-0.152908	0.387948	-0.484807	0.00366286	0.497355	0.00276577	-0.087828	0.621362	0.301565	0.0830518	-0.65215	2.92955e-05	-0.306377	0.0780178	-0.803126	1.09103e-08	0.189974	0.281867	0.902895	2.84421e-13	-0.0830161	0.640669	-0.706557	3.01371e-06	0.485449	0.00361156
ENSG00000181035	SLC25A42	284439	bisque4	0.217414	0.216775	0.138551	0.434542	0.0344482	0.846638	0.15709	0.374946	0.161864	0.360417	-0.283849	0.103766	-0.493053	0.00304903	0.298914	0.0859304	0.237523	0.176173	0.176879	0.316966	-0.604287	0.000153926	-0.321449	0.0637696	-0.483264	0.00378887	0.258676	0.139626	0.708943	2.69634e-06	-0.00822254	0.963189	-0.738314	6.22534e-07	0.252855	0.149076
ENSG00000204977	TRIM13	10206	bisque4	0.480558	0.00401895	0.14298	0.41985	-0.0893888	0.615151	0.425368	0.012144	0.687557	7.04454e-06	-0.584539	0.000283225	-0.857286	9.59121e-11	-0.0208565	0.906799	0.0651811	0.714185	0.70892	2.69926e-06	-0.791731	2.45718e-08	-0.143678	0.417559	-0.72767	1.08199e-06	0.0857121	0.629822	0.856485	1.04269e-10	0.260627	0.13656	-0.338724	0.0500463	0.427846	0.0115988
ENSG00000137070	IL11RA	3590	bisque4	0.07728	0.663989	-0.13359	0.451325	-0.222639	0.205657	0.0599494	0.736275	0.191204	0.278705	-0.284637	0.10277	-0.589143	0.000246553	0.329854	0.0567638	0.138498	0.434717	0.30313	0.0813877	-0.679706	9.82516e-06	-0.205733	0.243094	-0.68529	7.76265e-06	0.22908	0.192507	0.907333	1.39031e-13	0.0523335	0.768803	-0.712118	2.32126e-06	0.308653	0.0757204
ENSG00000109220	CHIC2	26511	bisque4	0.142291	0.422116	0.0115299	0.948399	0.474445	0.00458358	-0.108223	0.542371	-0.314289	0.0702592	0.057505	0.746669	0.589882	0.000241082	-0.0463327	0.794711	-0.0969289	0.585524	-0.492245	0.00310493	0.649206	3.27115e-05	0.312614	0.0718484	0.605903	0.000146173	-0.0638197	0.719912	-0.74382	4.62868e-07	-0.410352	0.0159313	0.352549	0.0408557	-0.35962	0.0367117
ENSG00000237400	AC006960.7	NA	bisque4	0.186706	0.290381	0.134189	0.449279	-0.179051	0.310964	0.263826	0.131638	0.38083	0.0262814	-0.311337	0.0730798	-0.562278	0.00053822	0.149645	0.398273	-0.0585745	0.742116	0.593747	0.000214186	-0.64177	4.30004e-05	-0.272141	0.119461	-0.610892	0.000124394	-0.0257061	0.885257	0.618766	9.58911e-05	0.127331	0.472992	-0.327381	0.0587586	0.630962	6.31818e-05
ENSG00000177885	GRB2	2885	bisque4	0.13857	0.434477	-0.0208485	0.906834	0.335979	0.0520536	0.142083	0.422802	-0.0744062	0.675793	0.159446	0.367734	0.380377	0.0264754	-0.462662	0.00586672	0.180999	0.305641	-0.280645	0.107897	0.514437	0.00185441	0.31893	0.0659964	0.754123	2.60462e-07	-0.284302	0.103193	-0.770327	9.94372e-08	0.0859731	0.628775	0.599268	0.000180408	-0.477353	0.00430699
ENSG00000031698	SARS	6301	bisque4	-0.458394	0.00640215	-0.0121776	0.945504	0.195002	0.269086	-0.500827	0.00255415	-0.666332	1.69314e-05	0.422569	0.0127859	0.895376	8.87275e-13	0.035331	0.842756	-0.191793	0.2772	-0.79965	1.40528e-08	0.918588	1.90196e-14	0.250138	0.153643	0.714756	2.04648e-06	0.126223	0.476884	-0.852969	1.49557e-10	-0.361005	0.0359416	0.401452	0.01861	-0.550488	0.000742753
ENSG00000086598	TMED2	10959	bisque4	0.098216	0.58053	0.15467	0.382438	0.117564	0.507862	0.0778785	0.661541	0.195956	0.266705	0.100385	0.57216	0.217414	0.216775	-0.447565	0.00795146	-0.198359	0.260768	0.044618	0.802155	0.388531	0.0231585	0.336618	0.0515805	0.369207	0.0316441	-0.119031	0.502544	-0.567821	0.000460658	0.153161	0.387155	0.781279	4.95804e-08	-0.17176	0.331395
ENSG00000114388	NPRL2	10641	bisque4	-0.111545	0.529972	-0.0587121	0.741531	0.15435	0.383436	-0.391971	0.0218662	-0.313294	0.0712004	-0.148711	0.40126	0.119482	0.500913	0.57727	0.000351058	-0.0751037	0.672921	-0.422273	0.0128553	0.00154697	0.993072	0.0127948	0.942747	-0.256645	0.142873	0.503864	0.00238072	0.346291	0.0448309	-0.492772	0.0030684	-0.624202	7.97921e-05	-0.0579553	0.744751
ENSG00000132823	OSER1	51526	bisque4	0.212304	0.228037	-0.226582	0.197535	-0.210338	0.232474	0.044499	0.802672	0.27197	0.119703	-0.220453	0.210259	-0.442265	0.00881955	0.320209	0.0648581	-0.239458	0.172573	0.475706	0.00446187	-0.527142	0.00135878	-0.0306634	0.86332	-0.672508	1.3214e-05	-0.139429	0.431606	0.63049	6.42321e-05	-0.0814302	0.647084	-0.36179	0.035511	0.583259	0.000294247
ENSG00000260948	RP11-552M11.8	NA	bisque4	0.263347	0.132367	-0.0133755	0.940153	-0.124854	0.481714	0.100217	0.572804	0.326309	0.0596403	-0.150114	0.396782	-0.467726	0.00528184	0.220459	0.210247	-0.145685	0.411017	0.458696	0.00636294	-0.563733	0.000516823	-0.154856	0.381859	-0.618835	9.56688e-05	0.113435	0.522977	0.589713	0.000242326	-0.00589221	0.973617	-0.345004	0.0456861	0.579008	0.00033364
ENSG00000174886	NDUFA11	126328	bisque4	-0.0828924	0.641168	-0.0804371	0.651114	-0.232453	0.185858	0.0557998	0.753946	0.066634	0.70809	-0.194985	0.269129	-0.432611	0.0106084	0.0247466	0.889513	0.237721	0.175803	0.133611	0.451255	-0.401181	0.0186971	-0.0633127	0.722049	-0.353567	0.0402373	0.326975	0.0590912	0.633653	5.74873e-05	0.183958	0.297666	-0.404915	0.0175265	-0.0820036	0.644762
ENSG00000163249	CCNYL1	151195	bisque4	0.077744	0.662091	0.270278	0.122114	0.0491457	0.782537	0.346436	0.0447356	0.272813	0.118515	0.0207296	0.907364	-0.00434137	0.980559	-0.53708	0.00105633	0.107017	0.546904	0.202961	0.249641	0.0797273	0.654	0.000231328	0.998964	0.332988	0.0543133	-0.173708	0.325856	-0.381886	0.0258339	0.433572	0.0104175	0.564091	0.00051167	-0.102027	0.565855
ENSG00000243753	HLA-L	3139	bisque4	0.0890358	0.616554	-0.0596772	0.73743	-0.22327	0.204343	0.180529	0.306919	0.306713	0.0776755	-0.184	0.297554	-0.548327	0.000786927	0.111731	0.529281	0.14856	0.401742	0.394292	0.0210285	-0.641928	4.27532e-05	-0.131881	0.457189	-0.539408	0.000994719	0.131661	0.457944	0.686591	7.34263e-06	0.261654	0.134965	-0.409753	0.0161009	0.345644	0.0452591
ENSG00000123329	ARHGAP9	64333	bisque4	-0.282891	0.104988	-0.0723405	0.684324	0.299674	0.0850974	-0.425264	0.0121676	-0.523341	0.00149316	0.180265	0.307638	0.63278	5.9281e-05	0.187756	0.287627	0.00778466	0.965148	-0.771057	9.50418e-08	0.632628	5.95989e-05	0.274926	0.115576	0.505313	0.0023017	0.252312	0.149981	-0.484073	0.00372234	-0.402188	0.0183753	0.024278	0.891593	-0.540093	0.00097719
ENSG00000279355	AGPAT4-IT1	79992	bisque4	0.00354872	0.984108	-0.185484	0.293608	-0.256371	0.143315	-0.144277	0.415599	0.00410959	0.981597	-0.09029	0.611577	-0.310229	0.0741617	0.562683	0.000532194	-0.23241	0.185943	0.288665	0.0977843	-0.501008	0.00254352	-0.196619	0.265059	-0.69565	4.94535e-06	-0.10256	0.563819	0.689161	6.57326e-06	-0.220851	0.209416	-0.644487	3.89436e-05	0.663649	1.88232e-05
ENSG00000099999	RNF215	200312	bisque4	0.0708988	0.690301	-0.13547	0.444925	-0.326394	0.0595696	0.223052	0.204797	0.293724	0.0917868	-0.330253	0.0564463	-0.533736	0.0011507	-0.0170468	0.923769	0.145451	0.411776	0.459216	0.00629586	-0.5201	0.00161679	-0.0938513	0.59754	-0.468303	0.00521852	-0.129562	0.465209	0.585221	0.000277504	0.2762	0.113831	-0.256078	0.143788	0.197759	0.262241
ENSG00000215440	NPEPL1	79716	bisque4	0.0452361	0.79947	-0.22776	0.195153	-0.253251	0.148418	0.083823	0.637415	0.214599	0.222931	-0.271495	0.120376	-0.619654	9.30768e-05	0.226876	0.196938	0.178481	0.312531	0.319495	0.065492	-0.660792	2.10474e-05	-0.106054	0.55054	-0.633084	5.86507e-05	0.262981	0.132926	0.887982	2.50495e-12	0.138343	0.435237	-0.629516	6.64462e-05	0.237282	0.176626
ENSG00000099899	TRMT2A	27037	bisque4	-0.0136433	0.938957	-0.20871	0.236192	-0.0120489	0.946079	-0.104251	0.557372	-0.0513494	0.773036	-0.0589946	0.74033	-0.230959	0.188782	0.337088	0.0512347	0.270634	0.121603	-0.133223	0.452582	-0.363849	0.0344009	-0.170681	0.334487	-0.305455	0.0789635	0.276123	0.113936	0.568356	0.000453722	-0.0923925	0.603273	-0.666433	1.68635e-05	-0.0156073	0.930189
ENSG00000197976	AKAP17A	8227	bisque4	0.385032	0.0245373	-0.0829301	0.641016	-0.0680764	0.702056	0.379637	0.0267948	0.516453	0.00176654	-0.360963	0.0359646	-0.757832	2.10321e-07	0.115859	0.514079	0.248313	0.156766	0.566594	0.000476915	-0.838918	5.79131e-10	-0.280891	0.107576	-0.604198	0.000154366	-0.0108457	0.951457	0.810024	6.50358e-09	0.21509	0.221849	-0.533738	0.00115066	0.4615	0.0060086
ENSG00000206573	THUMPD3-AS1	440944	bisque4	0.0783882	0.659459	-0.0623211	0.726234	-0.444561	0.00843412	0.209179	0.235117	0.491308	0.00317089	-0.275619	0.114624	-0.749096	3.45993e-07	0.0216064	0.903463	0.00776784	0.965223	0.687735	6.99056e-06	-0.75977	1.87796e-07	-0.192158	0.276269	-0.760794	1.7682e-07	0.0262984	0.882631	0.870009	2.36881e-11	0.378376	0.0273467	-0.296318	0.0888218	0.455404	0.00680159
ENSG00000129226	CD68	968	bisque4	-0.289483	0.0967945	-0.167584	0.343463	-0.619378	9.39424e-05	0.148763	0.401093	0.162924	0.357239	0.0905841	0.610413	-0.489408	0.00330839	-0.155931	0.378522	0.0459124	0.796534	0.541271	0.000947712	-0.485162	0.00363443	-0.112993	0.524611	-0.393349	0.0213657	-0.0380397	0.830868	0.505315	0.00230158	0.501024	0.00254258	-0.0412321	0.816905	0.262427	0.133774
ENSG00000271914	RP4-789D17.5	NA	bisque4	0.35054	0.0420999	0.00787603	0.964739	-0.166095	0.347827	0.321765	0.063494	0.499219	0.00265038	-0.298215	0.0867014	-0.765571	1.32959e-07	0.0926749	0.602162	0.117106	0.509528	0.622767	8.37873e-05	-0.82058	2.82568e-09	-0.154808	0.382008	-0.68312	8.51216e-06	0.0793333	0.655604	0.840224	5.13482e-10	0.234021	0.182824	-0.475651	0.0044671	0.521209	0.00157351
ENSG00000204104	TRAF3IP1	26146	bisque4	-0.0453626	0.79892	-0.0732263	0.680661	0.356496	0.0384987	-0.288903	0.0974954	-0.412907	0.0152249	0.258273	0.140266	0.634919	5.49711e-05	0.204577	0.245811	-0.137823	0.436981	-0.541836	0.000933835	0.582174	0.000303884	0.280294	0.108357	0.482083	0.00388785	-0.147852	0.404017	-0.63162	6.17448e-05	-0.487949	0.0034174	0.118085	0.505971	-0.145588	0.411332
ENSG00000223501	VPS52	6293	bisque4	-0.082254	0.643748	-0.213023	0.226429	-0.189205	0.283856	-0.00325504	0.985423	-0.00150033	0.993281	-0.193494	0.272881	-0.448521	0.0078029	0.255215	0.145191	0.246558	0.159812	0.099388	0.576	-0.514848	0.00183621	-0.00404985	0.981865	-0.466413	0.00542847	0.338004	0.0505664	0.753494	2.69983e-07	0.0540326	0.76151	-0.678085	1.05105e-05	0.0806842	0.65011
ENSG00000159917	ZNF235	9310	bisque4	-0.022747	0.898393	-0.114931	0.517474	-0.197487	0.262911	-0.314366	0.0701867	-0.011467	0.94868	-0.00711618	0.968139	-0.225291	0.200169	0.641916	4.27728e-05	-0.296444	0.08868	0.146845	0.40726	-0.445282	0.00831608	-0.30254	0.0820115	-0.72132	1.48668e-06	0.101302	0.568637	0.713008	2.22499e-06	-0.318462	0.0664169	-0.659239	2.23527e-05	0.565586	0.000490655
ENSG00000164885	CDK5	1020	bisque4	-0.527252	0.00135505	-0.0369645	0.835583	0.0293737	0.869018	-0.357015	0.0381972	-0.610148	0.000127446	0.439075	0.00937977	0.720657	1.53605e-06	-0.187558	0.288146	-0.0225323	0.899347	-0.65868	2.28406e-05	0.820891	2.75509e-09	0.341626	0.0479914	0.74753	3.77489e-07	0.0304041	0.864465	-0.784002	4.14469e-08	-0.0896611	0.61407	0.470805	0.00495134	-0.658254	2.32184e-05
ENSG00000131471	AOC3	8639	bisque4	-0.0756932	0.670497	0.0882801	0.61956	-0.332939	0.0543505	0.157192	0.374631	0.307793	0.0765826	-0.0339254	0.848939	-0.494214	0.00297022	-0.0742844	0.676295	0.110123	0.535262	0.441497	0.00895169	-0.527461	0.00134801	-0.232874	0.18504	-0.403918	0.017833	0.152093	0.390515	0.53798	0.00103212	0.430344	0.0110703	-0.191726	0.277371	0.288378	0.098133
ENSG00000267476	RP11-126O1.4	NA	bisque4	-0.0163505	0.926874	-0.0403529	0.820745	-0.518768	0.00167015	0.029392	0.868938	0.416875	0.0141798	-0.135808	0.443777	-0.550057	0.000751385	0.0742522	0.676427	-0.281396	0.106919	0.68433	8.08668e-06	-0.555145	0.000654953	-0.180581	0.306777	-0.742537	4.96298e-07	-0.22836	0.193946	0.672269	1.33428e-05	0.243307	0.165568	-0.0887697	0.617611	0.579448	0.000329361
ENSG00000246250	RP11-613D13.5	NA	bisque4	0.318356	0.0665124	0.13638	0.441844	-0.0728872	0.682062	0.0770707	0.664847	0.300507	0.0841918	-0.26005	0.137461	-0.470506	0.0049826	0.381525	0.0259864	-0.164516	0.352497	0.416296	0.0143284	-0.586256	0.000269012	-0.15354	0.385967	-0.706347	3.04324e-06	0.159986	0.366092	0.688079	6.88768e-06	-0.141113	0.426009	-0.509327	0.00209451	0.598385	0.00018547
ENSG00000197417	SHPK	23729	bisque4	-0.0876604	0.62203	-0.0967545	0.586202	0.131012	0.460185	-0.313478	0.0710252	-0.361403	0.0357224	0.296089	0.0890807	0.536366	0.00107588	0.177459	0.315354	-0.33486	0.0528899	-0.307283	0.077097	0.46579	0.00549923	0.0718674	0.686283	0.267903	0.125558	-0.207476	0.239037	-0.521303	0.0015699	-0.396095	0.0203962	0.211	0.230973	0.0385308	0.828717
ENSG00000265749	RP11-849F2.5	NA	bisque4	0.0757884	0.670106	-0.161028	0.362938	-0.290132	0.0960145	0.12216	0.491296	0.305475	0.0789429	-0.196272	0.26592	-0.63937	4.68951e-05	0.233054	0.184691	0.125706	0.478706	0.444569	0.00843266	-0.759172	1.94503e-07	-0.21165	0.229507	-0.703207	3.51717e-06	0.177833	0.314319	0.888989	2.18411e-12	0.201584	0.252936	-0.598496	0.000184829	0.41081	0.0158027
ENSG00000150787	PTS	5805	bisque4	-0.0635976	0.720848	-0.144948	0.413412	-0.666973	1.6506e-05	0.137045	0.4396	0.462273	0.00591389	-0.0937202	0.598055	-0.693182	5.51533e-06	-0.0313173	0.860434	-0.130942	0.460426	0.804359	9.96164e-09	-0.716753	1.85863e-06	-0.210742	0.231558	-0.773898	7.95841e-08	-0.127734	0.47158	0.781704	4.82215e-08	0.459537	0.00625481	-0.097774	0.582243	0.554122	0.000673416
ENSG00000125901	MRPS26	64949	bisque4	0.033012	0.852961	0.129955	0.463843	0.640467	4.50764e-05	-0.221671	0.207688	-0.448002	0.00788328	0.089439	0.614952	0.689118	6.58548e-06	0.0852707	0.631593	0.0740231	0.677372	-0.820337	2.88237e-09	0.731503	8.89303e-07	0.174355	0.32403	0.718994	1.66663e-06	0.122501	0.490078	-0.724569	1.26498e-06	-0.502904	0.0024344	0.0850493	0.632482	-0.55169	0.000719165
ENSG00000154832	CXXC1	30827	bisque4	-0.0401602	0.821587	-0.145885	0.410367	-0.229604	0.191462	0.221558	0.207924	0.205505	0.24363	-0.18699	0.289636	-0.565108	0.000497285	-0.00766204	0.965696	0.422309	0.0128468	0.249495	0.154737	-0.558771	0.00059309	-0.17062	0.334663	-0.339338	0.0496058	0.145574	0.411376	0.681986	8.9294e-06	0.331982	0.05509	-0.47967	0.00409711	0.0094643	0.957634
ENSG00000197948	FCHSD1	89848	bisque4	-0.0288556	0.871309	-0.183004	0.300224	-0.277976	0.111432	0.0237275	0.894037	0.12728	0.47317	-0.0863536	0.627252	-0.559742	0.000577416	0.297376	0.0876345	0.215677	0.220559	0.254884	0.145731	-0.694219	5.26889e-06	-0.246338	0.160197	-0.61578	0.000105925	0.316793	0.0679328	0.889675	1.98794e-12	0.13353	0.451533	-0.727227	1.10651e-06	0.275753	0.114442
ENSG00000105443	CYTH2	9266	bisque4	0.0854497	0.630874	-0.178125	0.313513	-0.155609	0.37952	-0.0030324	0.98642	0.0972663	0.584213	-0.254673	0.146076	-0.483869	0.00373908	0.457744	0.00648719	0.0511457	0.773913	0.246785	0.159416	-0.652612	2.87899e-05	-0.21629	0.219218	-0.68412	8.15913e-06	0.217064	0.217533	0.859748	7.39596e-11	-0.0976319	0.582794	-0.773655	8.08108e-08	0.426749	0.0118376
ENSG00000239127	SNORD125	100113380	bisque4	0.282375	0.105652	-0.127806	0.471331	-0.169303	0.338464	0.212567	0.227448	0.361806	0.0355021	-0.231477	0.187766	-0.631715	6.15401e-05	0.234048	0.182773	0.0524502	0.768301	0.542073	0.00092808	-0.763462	1.5091e-07	-0.162265	0.359212	-0.6751	1.18873e-05	0.0160037	0.928421	0.76952	1.04508e-07	0.0850083	0.632646	-0.520011	0.00162031	0.586584	0.000266377
ENSG00000265206	RP5-1171I10.5	NA	bisque4	0.00562149	0.974829	-0.0672856	0.705362	-0.217528	0.216527	-0.0321456	0.85678	0.169736	0.337211	-0.166521	0.346575	-0.486386	0.0035377	0.357865	0.0377073	0.0568687	0.749382	0.254652	0.14611	-0.621806	8.65602e-05	-0.28948	0.096798	-0.650163	3.15641e-05	0.173791	0.325622	0.836211	7.40716e-10	0.0427949	0.810089	-0.662868	1.9409e-05	0.360523	0.0362082
ENSG00000103051	COG4	25839	bisque4	-0.37509	0.0288278	-0.116137	0.51306	0.227399	0.19588	-0.627657	7.0867e-05	-0.732056	8.64273e-07	0.402358	0.0183212	0.892754	1.2931e-12	0.411814	0.0155238	-0.299167	0.0856521	-0.81608	4.05742e-09	0.804666	9.73717e-09	0.170319	0.335531	0.485617	0.0035982	-0.0178847	0.920033	-0.671733	1.36356e-05	-0.654852	2.64479e-05	0.0477695	0.788487	-0.271364	0.120562
ENSG00000160051	IQCC	55721	bisque4	-0.127046	0.473993	-0.0972844	0.584143	-0.106224	0.549898	-0.340819	0.0485559	-0.0610112	0.731774	-0.0137967	0.938272	-0.127924	0.470918	0.593848	0.000213518	-0.202244	0.251355	-0.0423813	0.811892	-0.297881	0.0870725	-0.182358	0.301961	-0.551651	0.000719904	0.263162	0.132649	0.585943	0.000271556	-0.293886	0.0915992	-0.618815	9.57329e-05	0.377364	0.027796
ENSG00000279568	RP11-20I23.5	NA	bisque4	0.334733	0.0529852	-0.0355339	0.841864	-0.141994	0.423095	0.296437	0.0886883	0.359852	0.0365817	-0.337126	0.0512068	-0.640282	4.53787e-05	0.209796	0.233707	0.00170314	0.992373	0.594355	0.000210208	-0.741656	5.20493e-07	-0.234113	0.182648	-0.672554	1.31894e-05	-0.156152	0.377838	0.737476	6.50828e-07	0.0697295	0.695163	-0.506381	0.00224489	0.65738	2.4012e-05
ENSG00000100380	ST13	6767	bisque4	-0.0096752	0.956691	0.332889	0.0543888	0.304693	0.0797521	0.133461	0.451765	-0.0458821	0.796665	-0.0131581	0.941124	0.434794	0.010179	-0.505732	0.00227926	0.0112502	0.949649	-0.26592	0.12849	0.650251	3.14604e-05	0.188608	0.285406	0.71732	1.80824e-06	-0.0860808	0.628344	-0.834503	8.63117e-10	0.0843821	0.635164	0.745617	4.19521e-07	-0.539739	0.000986211
ENSG00000278133	RP11-196G11.5	NA	bisque4	-0.0189864	0.915124	-0.108749	0.540397	-0.454442	0.00693457	0.258037	0.140641	0.338867	0.0499429	-0.370263	0.0311227	-0.725221	1.22427e-06	0.00385229	0.982749	0.170116	0.336115	0.598995	0.000181962	-0.732401	8.48981e-07	-0.201011	0.254316	-0.668108	1.57755e-05	0.0327235	0.854232	0.854369	1.29692e-10	0.378676	0.0272143	-0.396734	0.0201758	0.326694	0.0593222
ENSG00000212670	NA	NA	bisque4	-0.103635	0.559719	-0.305063	0.079368	-0.23802	0.175244	-0.329079	0.0573831	-0.162436	0.358699	0.144895	0.413583	-0.105948	0.55094	0.685482	7.69943e-06	-0.239383	0.172713	0.0756715	0.670586	-0.374389	0.0291526	-0.300235	0.0844865	-0.60634	0.000144139	-0.0306673	0.863303	0.557827	0.000608676	-0.353733	0.0401368	-0.683332	8.43617e-06	0.563387	0.000521845
ENSG00000188566	NDOR1	27158	bisque4	-0.00374366	0.983236	-0.240725	0.170245	-0.131537	0.458373	0.113764	0.521765	0.0421929	0.812713	-0.207383	0.239252	-0.513269	0.00190707	0.298608	0.0862665	0.35839	0.0374071	0.138857	0.433515	-0.634273	5.62417e-05	-0.130068	0.463452	-0.460604	0.00611995	0.222266	0.206438	0.802309	1.15846e-08	0.0692755	0.697053	-0.797682	1.61829e-08	0.175574	0.320605
ENSG00000134809	TIMM10	26519	bisque4	0.141611	0.424359	0.133231	0.452553	0.216205	0.219403	0.0945948	0.594627	0.0368496	0.836087	0.195221	0.268539	0.271355	0.120575	-0.397361	0.0199619	0.0324249	0.855548	-0.141111	0.426015	0.424886	0.0122527	0.155364	0.38028	0.544064	0.000880904	-0.24215	0.167653	-0.61725	0.000100873	0.0795863	0.654574	0.581593	0.000309164	-0.339259	0.0496623
ENSG00000086619	ERO1LB	56605	bisque4	0.026553	0.881503	-0.134355	0.448715	-0.40999	0.0160335	-0.0072644	0.967476	0.295321	0.0899532	-0.167293	0.344313	-0.595303	0.000204135	0.356098	0.038731	-0.0947877	0.593873	0.519874	0.00162574	-0.751414	3.03783e-07	-0.307598	0.0767793	-0.857087	9.79236e-11	0.0387558	0.827731	0.917693	2.25108e-14	0.102115	0.56552	-0.574507	0.000380409	0.596414	0.000197222
ENSG00000167614	TTYH1	57348	bisque4	-0.113634	0.522246	-0.226622	0.197454	-0.147731	0.404404	-0.269547	0.123167	-0.148787	0.401015	-0.0382442	0.829972	-0.173725	0.32581	0.604769	0.000151574	-0.143266	0.418911	0.00599091	0.973175	-0.370751	0.0308844	-0.202478	0.250794	-0.568142	0.000456492	0.244658	0.163159	0.633762	5.72669e-05	-0.294608	0.0907682	-0.72396	1.30405e-06	0.439965	0.00922056
ENSG00000215012	C22orf29	79680	bisque4	0.573292	0.000393997	0.146652	0.407882	0.516488	0.00176503	0.254869	0.145755	0.295692	0.0895311	-0.385491	0.0243525	-0.291515	0.0943692	0.196594	0.265121	0.362093	0.0353454	-0.0775713	0.662797	-0.364541	0.034034	-0.12936	0.465909	-0.136391	0.441805	0.236705	0.177712	0.359995	0.0365022	-0.166396	0.346944	-0.562835	0.000529939	-0.0335561	0.850564
ENSG00000143641	GALNT2	2590	bisque4	-0.0532368	0.764923	0.0526273	0.76754	0.300967	0.0836947	0.146505	0.408358	-0.195877	0.266903	0.0266443	0.881099	0.404511	0.0176499	-0.505046	0.00231606	0.229594	0.191483	-0.36744	0.0325326	0.629029	6.75811e-05	0.556912	0.000624133	0.832599	1.02155e-09	-0.0814868	0.646854	-0.7966	1.74776e-08	0.0987632	0.578413	0.606998	0.000141121	-0.604685	0.000151982
ENSG00000019102	VSIG2	23584	bisque4	0.0994552	0.57574	-0.0982276	0.580485	-0.19653	0.265278	0.361691	0.0355648	0.317903	0.0669221	-0.496415	0.00282564	-0.626351	7.41297e-05	-0.174631	0.323253	0.248748	0.156017	0.434997	0.01014	-0.503212	0.0024171	0.240167	0.171266	-0.348647	0.0432997	-0.022798	0.898166	0.599881	0.00017697	0.342886	0.0471206	-0.206868	0.240447	0.0493956	0.781458
ENSG00000137504	CREBZF	58487	bisque4	0.0133914	0.940082	-0.138952	0.433199	-0.116516	0.511677	-0.304712	0.0797319	0.00357846	0.983975	-0.146496	0.408387	-0.226108	0.1985	0.681104	9.26653e-06	-0.185882	0.292553	0.0483409	0.786015	-0.44141	0.00896691	-0.297155	0.0878812	-0.710616	2.49225e-06	0.213374	0.225646	0.734007	7.80998e-07	-0.343944	0.0463996	-0.760399	1.80987e-07	0.439197	0.00935789
ENSG00000102908	NFAT5	10725	bisque4	0.330448	0.0562927	-0.0571423	0.748215	-0.237892	0.175483	0.221384	0.208292	0.460477	0.00613587	-0.116862	0.510417	-0.592579	0.000222016	0.268493	0.124695	-0.0886284	0.618173	0.684075	8.17479e-06	-0.811243	5.9221e-09	-0.45075	0.00746574	-0.754988	2.47872e-07	-0.249481	0.154762	0.707555	2.87708e-06	0.101004	0.569779	-0.443986	0.00852919	0.840831	4.85376e-10
ENSG00000257270	RP11-521B24.5	NA	bisque4	0.1313	0.459192	-0.0842568	0.635668	-0.0864798	0.626747	0.168255	0.341507	0.123424	0.486787	-0.339072	0.0497959	-0.551239	0.000727931	0.249282	0.155101	0.22061	0.209926	0.232777	0.185229	-0.612743	0.000117085	-0.265958	0.128433	-0.521693	0.00155496	0.230573	0.189543	0.793929	2.10922e-08	0.0380731	0.830722	-0.701218	3.85106e-06	0.228807	0.193051
ENSG00000164828	SUN1	23353	bisque4	0.0697883	0.694918	-0.180142	0.307974	0.0796471	0.654327	-0.18306	0.300073	-0.082868	0.641267	-0.330286	0.0564203	-0.15977	0.366749	0.503394	0.0024069	-0.00656509	0.970605	-0.11915	0.502113	-0.256092	0.143766	0.0807731	0.649749	-0.411019	0.0157443	0.180109	0.308066	0.548041	0.000792946	-0.349985	0.0424489	-0.640719	4.46687e-05	0.14521	0.41256
ENSG00000117616	RSRP1	57035	bisque4	0.0677687	0.703342	-0.238729	0.173923	-0.248632	0.156216	-0.0804428	0.651091	0.166829	0.345672	-0.204023	0.247119	-0.475534	0.00447834	0.494497	0.00295125	-0.07071	0.691085	0.322657	0.0627227	-0.656588	2.47528e-05	-0.340647	0.0486769	-0.792062	2.40166e-08	0.113399	0.52311	0.873415	1.58894e-11	-0.100245	0.572697	-0.712226	2.30932e-06	0.528968	0.00129809
ENSG00000136280	CCM2	83605	bisque4	-0.347492	0.0440448	-0.111886	0.528705	0.320992	0.0641693	-0.510759	0.00202462	-0.738426	6.18829e-07	0.474859	0.00454335	0.848773	2.27269e-10	0.221564	0.207912	-0.0165027	0.926195	-0.931692	1.26292e-15	0.793491	2.17473e-08	0.197561	0.262731	0.684292	8.09959e-06	0.164565	0.352351	-0.710725	2.47955e-06	-0.484058	0.00372363	0.0337916	0.849528	-0.534225	0.00113647
ENSG00000185189	NRBP2	340371	bisque4	-0.11455	0.518876	-0.185084	0.294668	-0.279563	0.109319	-0.0772048	0.664298	0.0578491	0.745204	-0.0550864	0.756997	-0.417013	0.0141445	0.282571	0.1054	0.160168	0.36554	0.143094	0.419475	-0.513499	0.0018966	-0.20025	0.256157	-0.507465	0.0021885	0.20678	0.240651	0.748998	3.47896e-07	0.0998056	0.574389	-0.618696	9.6117e-05	0.179844	0.30879
ENSG00000140263	SORD	6652	bisque4	0.0200447	0.910412	0.23375	0.183345	0.507346	0.00219463	-0.303203	0.0813107	-0.29578	0.0894308	0.146594	0.408072	0.731015	9.11991e-07	0.146142	0.409535	-0.291197	0.0947456	-0.58719	0.000261556	0.707573	2.8746e-06	0.0410438	0.817727	0.524299	0.00145824	-0.0842117	0.635849	-0.769049	1.07583e-07	-0.494129	0.00297593	0.315638	0.0689987	-0.241824	0.168242
ENSG00000180008	SOCS4	122809	bisque4	0.122198	0.491161	-0.112286	0.527226	-0.498289	0.00270743	0.25554	0.144661	0.504702	0.00233472	-0.241904	0.168097	-0.759225	1.939e-07	0.0128166	0.942649	0.0134181	0.939963	0.769011	1.0783e-07	-0.81717	3.72055e-09	-0.222894	0.205126	-0.785829	3.6698e-08	-0.0699932	0.694065	0.853578	1.40588e-10	0.40338	0.0180001	-0.283419	0.104314	0.534051	0.0011415
ENSG00000092421	SEMA6A	57556	bisque4	0.058259	0.743458	-0.2369	0.177344	-0.327153	0.0589448	-0.0328755	0.853563	0.17885	0.311515	-0.0989809	0.577571	-0.516609	0.00175989	0.476583	0.00437881	-0.0407221	0.819132	0.411009	0.0157472	-0.744452	4.47181e-07	-0.397237	0.0200041	-0.799011	1.47142e-08	-0.00305287	0.986329	0.889159	2.13385e-12	-0.0206272	0.907819	-0.716341	1.89599e-06	0.62702	7.2441e-05
ENSG00000099889	ARVCF	421	bisque4	0.225482	0.199778	0.21385	0.224588	-0.00159993	0.992835	0.32468	0.061	0.345354	0.0454523	-0.44536	0.00830337	-0.635208	5.44113e-05	0.060969	0.731953	0.261039	0.135917	0.326575	0.0594204	-0.607551	0.000138629	-0.359776	0.0366246	-0.471913	0.00483674	0.454083	0.00698477	0.708045	2.81208e-06	0.189755	0.282434	-0.515708	0.00179857	0.150503	0.395546
ENSG00000105173	CCNE1	898	bisque4	0.290459	0.0956242	0.145288	0.412305	-0.207865	0.238138	0.293482	0.0920671	0.579883	0.000325168	-0.289292	0.0970254	-0.721373	1.48276e-06	0.0298641	0.866851	0.0520301	0.770107	0.624513	7.89497e-05	-0.738941	6.02092e-07	-0.345841	0.0451282	-0.665587	1.74387e-05	-0.0267965	0.880424	0.762311	1.61626e-07	0.312772	0.0716981	-0.315951	0.0687079	0.463036	0.0058218
ENSG00000261373	VPS9D1-AS1	100128881	bisque4	0.110987	0.532043	-0.247832	0.157596	-0.409425	0.0161943	0.24308	0.165975	0.404442	0.0176713	-0.231626	0.187474	-0.77009	1.009e-07	0.12753	0.472294	0.131743	0.457664	0.648223	3.39298e-05	-0.85914	7.8899e-11	-0.214206	0.2238	-0.761753	1.67071e-07	-0.0517682	0.771233	0.93761	3.09251e-16	0.316654	0.0680605	-0.516942	0.00174578	0.52286	0.00151098
ENSG00000055609	KMT2C	58508	bisque4	0.272492	0.118966	-0.0695477	0.69592	-0.307306	0.0770736	0.409844	0.0160749	0.501257	0.00252898	-0.182848	0.300642	-0.670146	1.45378e-05	0.0244722	0.890731	0.0531575	0.765264	0.8004	1.33117e-08	-0.824471	2.04985e-09	-0.375202	0.0287763	-0.628913	6.78524e-05	-0.407036	0.016889	0.630905	6.33074e-05	0.316144	0.0685303	-0.279952	0.108807	0.759088	1.95462e-07
ENSG00000241769	LINC00893	100131434	bisque4	-0.0627178	0.724559	-0.0356185	0.841493	-0.402235	0.0183603	-0.0482585	0.786372	0.20352	0.248311	-0.169729	0.337232	-0.540177	0.000975051	0.364152	0.03424	-0.102405	0.56441	0.439453	0.00931193	-0.677041	1.09745e-05	-0.306693	0.0776952	-0.81799	3.48415e-09	0.15375	0.385309	0.888628	2.29455e-12	0.0606862	0.733151	-0.578541	0.000338246	0.538294	0.00102379
ENSG00000261997	RP11-212I21.4	NA	bisque4	0.0489524	0.783372	-0.210216	0.232752	-0.269036	0.123906	-0.128545	0.468749	0.0760171	0.669167	0.0186534	0.916608	-0.372184	0.0301924	0.56492	0.000499923	-0.13077	0.461022	0.30479	0.0796509	-0.65441	2.68952e-05	-0.356908	0.0382589	-0.761258	1.72034e-07	0.00808695	0.963795	0.789847	2.79669e-08	-0.141035	0.426265	-0.731425	8.92895e-07	0.663627	1.88397e-05
ENSG00000102901	CENPT	80152	bisque4	-0.00318646	0.98573	-0.116045	0.513396	-0.140075	0.429455	-0.124636	0.482488	0.0791488	0.656356	-0.204528	0.245926	-0.4015	0.0185948	0.451636	0.00733525	0.0545215	0.759415	0.0994779	0.575653	-0.52234	0.00153044	-0.227986	0.194698	-0.627662	7.08553e-05	0.35219	0.0410764	0.807011	8.17326e-09	-0.110378	0.534312	-0.726496	1.1482e-06	0.254763	0.145928
ENSG00000146540	C7orf50	84310	bisque4	-0.170638	0.334612	0.125862	0.478156	0.187272	0.288895	0.0531862	0.76514	-0.289426	0.096863	0.270116	0.122346	0.41854	0.0137597	-0.375503	0.0286381	0.193393	0.273135	-0.38484	0.0246146	0.539632	0.000988963	0.0439938	0.80487	0.718374	1.71784e-06	-0.00212119	0.990501	-0.702481	3.6358e-06	0.107788	0.544003	0.419671	0.0134801	-0.509237	0.00209896
ENSG00000246859	STARD4-AS1	100505678	bisque4	-0.0466302	0.793421	-0.00901642	0.959637	-0.0436411	0.806404	-0.218326	0.214805	-0.139349	0.431873	-0.0893384	0.615351	-0.178403	0.312745	0.528047	0.00132839	-0.0528262	0.766686	-0.0816751	0.646092	-0.325836	0.0600322	-0.292378	0.0933535	-0.479038	0.00415349	0.308423	0.0759504	0.602065	0.00016519	-0.264906	0.130008	-0.72798	1.06509e-06	0.210563	0.231964
ENSG00000004838	ZMYND10	51364	bisque4	-0.00958683	0.957086	-0.31704	0.0677072	-0.157166	0.37471	-0.169259	0.338589	0.0295181	0.86838	-0.0610892	0.731444	-0.267161	0.126649	0.505661	0.00228303	-0.0841849	0.635957	0.139582	0.431094	-0.460398	0.0061458	-0.309401	0.074977	-0.594289	0.000210635	0.0361997	0.83894	0.645138	3.80241e-05	-0.191378	0.27826	-0.637726	4.97445e-05	0.463554	0.00575994
ENSG00000100429	HDAC10	83933	bisque4	0.0172541	0.922844	-0.288344	0.0981739	-0.140869	0.426816	0.0351122	0.843718	0.0848947	0.633103	-0.265211	0.129549	-0.487524	0.00344977	0.295595	0.0896403	0.18391	0.297796	0.175767	0.320065	-0.560089	0.00057191	-0.182413	0.301813	-0.524353	0.00145629	0.209368	0.234684	0.793813	2.12649e-08	0.00912954	0.959131	-0.695364	5.00858e-06	0.214986	0.222077
ENSG00000215375	MYL5	4636	bisque4	0.0546488	0.75887	-0.27856	0.11065	-0.260033	0.137488	0.0559221	0.753424	0.155979	0.378374	-0.241348	0.169107	-0.589543	0.000243579	0.345715	0.0452119	0.145275	0.412348	0.326065	0.0598427	-0.704644	3.29252e-06	-0.154442	0.38315	-0.680888	9.35101e-06	0.149741	0.397967	0.90628	1.65314e-13	0.0381005	0.830602	-0.721793	1.45234e-06	0.361308	0.0357749
ENSG00000197608	ZNF841	284371	bisque4	0.0211662	0.905421	-0.198248	0.261039	-0.430757	0.0109848	-0.0329938	0.853041	0.290712	0.0953221	-0.0685228	0.700192	-0.596278	0.000198061	0.366466	0.0330311	-0.0991085	0.577079	0.529218	0.00128999	-0.765863	1.30636e-07	-0.373945	0.0293594	-0.857663	9.22002e-11	0.00540382	0.975803	0.929683	1.97881e-15	0.0995192	0.575493	-0.575901	0.00036534	0.622841	8.35766e-05
ENSG00000116005	PCYOX1	51449	bisque4	0.0822915	0.643597	0.309218	0.0751588	0.62498	7.76991e-05	-0.213028	0.226418	-0.267894	0.125572	-0.0938444	0.597567	0.661569	2.04196e-05	0.0496101	0.780532	-0.177108	0.316328	-0.655475	2.58272e-05	0.747637	3.75249e-07	0.272037	0.119608	0.58384	0.000289192	0.1432	0.419126	-0.735713	7.14294e-07	-0.478675	0.00418617	0.292352	0.0933847	-0.427726	0.0116249
ENSG00000122515	ZMIZ2	83637	bisque4	-0.064975	0.715051	-0.265445	0.129199	-0.278241	0.111077	0.157767	0.372865	0.0609626	0.73198	-0.119471	0.500956	-0.578405	0.000339594	0.220621	0.209903	0.399314	0.0193066	0.2512	0.151846	-0.709951	2.57162e-06	-0.182131	0.302574	-0.481482	0.00393913	0.166854	0.345598	0.834119	8.93115e-10	0.21503	0.22198	-0.765941	1.30018e-07	0.223582	0.203695
ENSG00000271913	RP1-111C20.4	NA	bisque4	0.105346	0.553219	-0.0983354	0.580068	-0.196778	0.264665	-0.118571	0.50421	0.169399	0.338185	-0.0623937	0.725927	-0.373509	0.0295639	0.456938	0.0065941	-0.247322	0.158481	0.335859	0.0521423	-0.560706	0.000562232	-0.306526	0.0778655	-0.71806	1.74432e-06	0.0110856	0.950385	0.719246	1.64623e-06	-0.148489	0.401972	-0.535088	0.0011117	0.57528	0.000371981
ENSG00000129007	CALML4	91860	bisque4	-0.422685	0.0127588	-0.132594	0.454738	0.16262	0.358148	-0.590578	0.00023603	-0.676175	1.13738e-05	0.571542	0.000414316	0.856732	1.01616e-10	0.195789	0.26712	-0.187366	0.28865	-0.803332	1.07466e-08	0.81462	4.55343e-09	0.228396	0.193874	0.611455	0.00012213	0.0112421	0.949685	-0.727252	1.10514e-06	-0.422382	0.0128297	0.213981	0.224299	-0.418805	0.0136937
ENSG00000178338	ZNF354B	117608	bisque4	0.0823016	0.643556	-0.126393	0.476285	-0.053146	0.765313	-0.30817	0.0762036	0.015531	0.93053	-0.0787897	0.65782	-0.168948	0.339491	0.701805	3.74966e-06	-0.246276	0.160307	0.038094	0.83063	-0.42831	0.011499	-0.393487	0.0213158	-0.696492	4.7634e-06	0.215087	0.221854	0.664877	1.79347e-05	-0.398199	0.0196785	-0.719153	1.65369e-06	0.488768	0.00335583
ENSG00000165997	ARL5B	221079	bisque4	0.009789	0.956182	-0.104588	0.556094	-0.571321	0.000416955	0.187871	0.287327	0.424209	0.0124065	-0.18518	0.294413	-0.684249	8.11461e-06	0.0665613	0.708394	-0.097681	0.582604	0.788449	3.07609e-08	-0.767645	1.17234e-07	-0.274964	0.115524	-0.784355	4.04871e-08	-0.219015	0.213325	0.798984	1.47434e-08	0.36205	0.0353691	-0.240483	0.170687	0.635954	5.2989e-05
ENSG00000128191	DGCR8	54487	bisque4	0.423493	0.0125708	0.146895	0.407097	0.273736	0.117225	0.414349	0.0148379	0.391092	0.0221906	-0.496446	0.00282367	-0.562306	0.000537808	0.0796491	0.654318	0.375634	0.0285785	0.20967	0.233994	-0.563396	0.000521713	-0.0931611	0.60025	-0.293045	0.092574	0.284108	0.103438	0.582134	0.000304247	0.100916	0.570118	-0.565051	0.000498086	0.116675	0.511097
ENSG00000109881	CCDC34	91057	bisque4	0.120886	0.495861	0.0967031	0.586402	0.39612	0.0203876	-0.24974	0.154319	-0.186913	0.289837	0.122887	0.4887	0.52443	0.00145353	0.279886	0.108894	-0.292094	0.0936875	-0.372867	0.0298672	0.408044	0.0165928	-0.0821846	0.644029	0.231885	0.186967	-0.156678	0.376215	-0.488297	0.00339115	-0.485389	0.00361633	0.0995447	0.575395	0.0929675	0.601011
ENSG00000113407	TARS	6897	bisque4	-0.281125	0.10727	-0.191962	0.276767	-0.0353886	0.842503	-0.197045	0.264004	-0.402147	0.0183884	0.400961	0.0187682	0.612862	0.00011663	-0.176612	0.317707	-0.142005	0.423059	-0.326768	0.0592613	0.621888	8.6322e-05	0.144278	0.415597	0.542021	0.00092934	-0.243868	0.164565	-0.750732	3.15689e-07	-0.104013	0.55828	0.539384	0.000995333	-0.293417	0.092142
ENSG00000248323	LUCAT1	100505994	bisque4	-0.108034	0.543081	-0.020111	0.910117	-0.647878	3.43671e-05	0.293135	0.0924692	0.471359	0.0048938	-0.159548	0.367423	-0.72869	1.02726e-06	-0.243299	0.165583	0.0169513	0.924194	0.799552	1.41524e-08	-0.688192	6.85442e-06	-0.220481	0.210199	-0.632134	6.06427e-05	-0.0213486	0.90461	0.703534	3.46475e-06	0.629638	6.61662e-05	0.00506248	0.977331	0.389457	0.0228048
ENSG00000185104	FAF1	11124	bisque4	-0.0271034	0.879065	0.161289	0.362149	0.239957	0.171654	0.131615	0.458105	-0.0633208	0.722015	0.0171147	0.923465	0.399445	0.0192634	-0.521599	0.00155852	0.0160764	0.928096	-0.227303	0.196074	0.635484	5.38817e-05	0.290499	0.095576	0.706043	3.08646e-06	-0.137124	0.439333	-0.810963	6.05126e-09	0.108399	0.541709	0.768961	1.08164e-07	-0.532903	0.00117535
ENSG00000058453	CROCC	9696	bisque4	0.274169	0.116623	0.289434	0.0968537	0.19975	0.257371	0.344932	0.045734	0.247244	0.158616	-0.34689	0.0444374	-0.503957	0.00237563	0.135072	0.446276	0.449631	0.00763346	0.116091	0.513228	-0.559739	0.000577462	-0.191319	0.278411	-0.274088	0.116735	0.340643	0.0486799	0.590357	0.000237625	0.0970134	0.585195	-0.657349	2.40406e-05	0.0624851	0.725541
ENSG00000162341	TPCN2	219931	bisque4	-0.0331366	0.852412	-0.251634	0.151116	-0.110557	0.533645	0.0958497	0.589725	-0.0741301	0.676931	-0.15768	0.373131	-0.354081	0.0399277	0.0950647	0.59279	0.414751	0.0147313	0.00565522	0.974678	-0.381326	0.0260703	0.17044	0.33518	-0.183541	0.298782	0.0819961	0.644792	0.520521	0.00160025	0.122024	0.491782	-0.549335	0.000766036	-0.0362794	0.83859
ENSG00000229598	PRDX3P1	NA	bisque4	-0.0542077	0.76076	-0.123891	0.485127	-0.508864	0.00211756	0.0194084	0.913245	0.24114	0.169486	-0.134108	0.449556	-0.54673	0.000821041	0.249419	0.154867	-0.210043	0.233144	0.604176	0.000154473	-0.646164	3.66158e-05	-0.153165	0.387144	-0.784133	4.10895e-08	-0.0834774	0.638807	0.784564	3.99284e-08	0.141472	0.424819	-0.356227	0.0386554	0.645429	3.76198e-05
ENSG00000171421	MRPL36	64979	bisque4	-0.253125	0.148628	-0.0220507	0.901488	0.291535	0.0943465	-0.443597	0.0085941	-0.514423	0.00185504	0.414503	0.014797	0.816822	3.82528e-09	0.0798903	0.653337	-0.155379	0.380235	-0.744159	4.54386e-07	0.79937	1.43391e-08	0.051393	0.772848	0.645996	3.68437e-05	0.0295874	0.868074	-0.785583	3.73079e-08	-0.385192	0.0244728	0.320652	0.0644672	-0.477491	0.00429428
ENSG00000116679	IVNS1ABP	10625	bisque4	-0.110064	0.535482	-0.00324447	0.985471	-0.627069	7.23204e-05	0.249285	0.155097	0.41039	0.0159207	-0.262933	0.132999	-0.677931	1.05777e-05	-0.116286	0.512519	-0.0531512	0.76529	0.792218	2.37582e-08	-0.674389	1.22386e-05	-0.178216	0.313262	-0.689022	6.61283e-06	-0.0793979	0.655341	0.717839	1.76314e-06	0.482439	0.00385784	-0.0712813	0.688713	0.478722	0.00418188
ENSG00000262919	FAM58A	92002	bisque4	-0.0301797	0.865457	0.275681	0.11454	0.563397	0.000521701	-0.202813	0.249995	-0.435148	0.0101109	0.106978	0.547053	0.708396	2.76628e-06	-0.087223	0.623776	-0.00726146	0.967489	-0.762587	1.59001e-07	0.811567	5.7762e-09	0.217416	0.21677	0.7712	9.42035e-08	0.166701	0.346048	-0.824246	2.0887e-09	-0.364322	0.0341497	0.320937	0.0642172	-0.631482	6.20434e-05
ENSG00000155229	MMS19	64210	bisque4	0.00963924	0.956852	-0.117081	0.509617	0.211025	0.230917	-0.372731	0.0299315	-0.235729	0.179559	-0.192863	0.274477	0.0725809	0.683329	0.66793	1.58884e-05	-0.102089	0.565621	-0.374067	0.0293023	-0.0680174	0.702302	0.000156153	0.999301	-0.322821	0.0625815	0.316869	0.0678634	0.404303	0.0177139	-0.566012	0.0004848	-0.699191	4.22082e-06	0.0896854	0.613974
ENSG00000178971	CTC1	80169	bisque4	0.051184	0.773748	-0.227346	0.195987	-0.225738	0.199255	0.045566	0.798037	0.132081	0.4565	-0.165251	0.350317	-0.534469	0.00112943	0.363074	0.0348151	0.142831	0.42034	0.280084	0.108633	-0.663148	1.91975e-05	-0.122611	0.489684	-0.6307	6.37628e-05	0.0956294	0.590585	0.842075	4.32152e-10	0.0335994	0.850374	-0.739544	5.83021e-07	0.378465	0.0273074
ENSG00000099251	HSD17B7P2	158160	bisque4	0.116347	0.512294	-0.269877	0.12269	-0.0680979	0.701966	-0.289517	0.0967541	0.0341361	0.848011	0.11525	0.516305	-0.160091	0.365772	0.683678	8.3136e-06	-0.164458	0.352667	0.0612273	0.73086	-0.473562	0.00467054	-0.409	0.0163162	-0.633868	5.70522e-05	0.0290592	0.870409	0.622603	8.42535e-05	-0.364922	0.0338336	-0.721059	1.50593e-06	0.552512	0.000703399
ENSG00000006007	GDE1	51573	bisque4	0.0783945	0.659433	0.180462	0.307102	0.563999	0.000512985	-0.0417917	0.814462	-0.231657	0.187412	0.135998	0.443134	0.634602	5.55914e-05	-0.288904	0.0974948	0.0588147	0.741095	-0.60284	0.000161182	0.779368	5.61376e-08	0.322867	0.0625417	0.857563	9.31709e-11	0.0170967	0.923546	-0.924116	6.4303e-15	-0.192785	0.274676	0.536723	0.00106607	-0.6349	5.50089e-05
ENSG00000183891	TTC32	130502	bisque4	0.276493	0.113433	0.0260133	0.883895	-0.0855996	0.630273	0.0153342	0.931408	0.402607	0.0182427	-0.43081	0.0109739	-0.448292	0.00783834	0.237657	0.175923	-0.173034	0.327768	0.349486	0.0427643	-0.449955	0.00758458	-0.0994745	0.575666	-0.676871	1.10521e-05	0.159786	0.366699	0.653256	2.8098e-05	-0.0630253	0.723261	-0.304396	0.0800608	0.309936	0.0744488
ENSG00000143127	ITGA10	8515	bisque4	0.00498694	0.977669	-0.196552	0.265224	-0.0804651	0.651	-0.363536	0.0345676	-0.017414	0.922131	0.0569326	0.749109	-0.111165	0.531383	0.686703	7.30757e-06	-0.201514	0.253106	-0.0163337	0.926949	-0.399918	0.0191079	-0.464103	0.00569495	-0.623211	8.25306e-05	0.119477	0.500933	0.607175	0.000140316	-0.362514	0.0351172	-0.705185	3.21138e-06	0.466437	0.00542572
ENSG00000254165	RP11-503E24.2	NA	bisque4	0.0476906	0.788828	-0.14036	0.428506	-0.323347	0.0621307	0.124659	0.482405	0.199557	0.25784	-0.250038	0.153812	-0.565102	0.000497366	0.2558	0.144238	0.00909975	0.959265	0.464013	0.00570555	-0.674594	1.21366e-05	-0.10123	0.568911	-0.704203	3.35991e-06	0.0680219	0.702283	0.797118	1.68461e-08	0.0956016	0.590693	-0.53466	0.00112392	0.504521	0.00234463
ENSG00000181924	COA4	51287	bisque4	-0.338066	0.0505214	-0.0348588	0.844832	0.296986	0.0880707	-0.569001	0.000445492	-0.691996	5.80995e-06	0.413173	0.0151528	0.899688	4.67162e-13	0.23065	0.189391	-0.215693	0.220524	-0.864252	4.53841e-11	0.867924	3.00824e-11	0.223766	0.203313	0.626135	7.46816e-05	0.0818662	0.645318	-0.770719	9.70526e-08	-0.54344	0.000895458	0.201982	0.251983	-0.476022	0.00443174
ENSG00000179958	DCTPP1	79077	bisque4	-0.0173562	0.922389	0.226848	0.196995	0.532594	0.0011846	-0.322647	0.0627315	-0.405076	0.0174771	0.137469	0.438171	0.75101	3.10785e-07	0.0244248	0.890942	-0.19016	0.281388	-0.734523	7.60246e-07	0.83752	6.57947e-10	0.212342	0.227952	0.658842	2.26982e-05	0.102365	0.564564	-0.808994	7.03477e-09	-0.481957	0.00389853	0.358762	0.0371955	-0.514545	0.00184963
ENSG00000114120	SLC25A36	55186	bisque4	0.502197	0.00247465	0.0759966	0.669251	-0.132307	0.455722	0.371241	0.0306462	0.710702	2.48223e-06	-0.428109	0.0115423	-0.82623	1.76853e-09	0.0810671	0.648556	-0.0447352	0.801646	0.780618	5.17653e-08	-0.849338	2.14986e-10	-0.296074	0.0890977	-0.808308	7.41106e-09	-0.0435881	0.806635	0.853298	1.44652e-10	0.209136	0.235215	-0.345944	0.0450603	0.639259	4.70834e-05
ENSG00000100359	SGSM3	27352	bisque4	-0.0582223	0.743615	-0.0913357	0.607441	0.098029	0.581254	-0.0433032	0.807875	-0.120523	0.497163	-0.195668	0.267424	-0.211022	0.230924	0.261307	0.135502	0.372423	0.030078	-0.256274	0.143471	-0.237767	0.175717	0.0179848	0.919587	-0.143902	0.416828	0.406074	0.0171756	0.491608	0.00314966	-0.0747761	0.674269	-0.659704	2.19543e-05	-0.191624	0.277631
ENSG00000136059	VILL	50853	bisque4	0.0745283	0.67529	-0.223135	0.204623	0.110462	0.533997	-0.124321	0.483604	0.0179205	0.919874	-0.150443	0.395735	-0.184283	0.2968	0.387097	0.0237155	0.124065	0.484509	-0.114983	0.517287	-0.251199	0.151847	-0.0937398	0.597978	-0.277347	0.112277	0.120903	0.495799	0.469324	0.00510804	-0.190861	0.279584	-0.582351	0.000302291	0.0922367	0.603887
ENSG00000122678	POLM	27434	bisque4	-0.202854	0.249896	-0.0715839	0.687458	-0.299526	0.0852586	0.0728209	0.682336	0.0349732	0.844329	-0.142399	0.421759	-0.408645	0.0164184	0.145314	0.41222	0.260888	0.136153	0.168291	0.341401	-0.476653	0.00437227	-0.198253	0.261029	-0.386432	0.0239778	0.22073	0.209673	0.612651	0.00011744	0.223073	0.204754	-0.506721	0.00222707	0.0890639	0.616442
ENSG00000250067	YJEFN3	374887	bisque4	0.00824673	0.96308	-0.0956706	0.590424	-0.304108	0.0803611	0.181721	0.303683	0.281604	0.106648	-0.106862	0.54749	-0.636151	5.26201e-05	0.14048	0.428108	0.262129	0.134233	0.404546	0.0176392	-0.749108	3.45766e-07	-0.410571	0.0158698	-0.594224	0.000211062	0.0924381	0.603094	0.835547	7.86267e-10	0.294801	0.090547	-0.594212	0.000211141	0.307385	0.0769936
ENSG00000178741	COX5A	9377	bisque4	-0.018573	0.916966	0.171938	0.330886	0.209462	0.234469	0.257967	0.140752	0.0492767	0.781971	0.0350616	0.84394	0.244693	0.163097	-0.743772	4.64077e-07	0.228777	0.193112	-0.177291	0.31582	0.539037	0.00100432	0.301624	0.0829887	0.774398	7.71173e-08	-0.0167254	0.925202	-0.74148	5.25481e-07	0.366635	0.0329439	0.826066	1.79314e-09	-0.669824	1.47273e-05
ENSG00000204209	DAXX	1616	bisque4	-0.31167	0.0727574	-0.129115	0.466761	0.335634	0.0523102	-0.625229	7.70397e-05	-0.755013	2.47524e-07	0.438091	0.0095586	0.899285	4.96671e-13	0.44869	0.00777691	-0.193713	0.272326	-0.914868	3.78342e-14	0.756983	2.20938e-07	0.123183	0.487647	0.517003	0.00174321	0.117152	0.509361	-0.6372	5.06885e-05	-0.684557	8.00894e-06	-0.0839215	0.637018	-0.324935	0.0607855
ENSG00000258515	RP11-203M5.7	NA	bisque4	0.0163463	0.926892	-0.121791	0.492615	-0.339136	0.0497505	-0.0365624	0.837347	0.2685	0.124685	-0.157824	0.37269	-0.541938	0.000931345	0.396682	0.0201939	-0.117194	0.509208	0.455177	0.00683281	-0.71708	1.82941e-06	-0.306998	0.0773858	-0.830362	1.2419e-09	0.0773712	0.663616	0.882798	4.97029e-12	0.0394081	0.824876	-0.572808	0.000399523	0.602053	0.00016525
ENSG00000146834	MEPCE	56257	bisque4	-0.0790533	0.656745	-0.205849	0.242823	-0.586889	0.000263943	0.421823	0.0129616	0.296227	0.0889247	-0.167556	0.343543	-0.733602	7.97685e-07	-0.173928	0.325236	0.287878	0.0987434	0.724621	1.26167e-06	-0.764991	1.37693e-07	-0.131656	0.457963	-0.497675	0.0027457	-0.26879	0.124263	0.689491	6.47985e-06	0.578622	0.000337445	-0.256611	0.142926	0.362446	0.0351539
ENSG00000092201	SUPT16H	11198	bisque4	0.029671	0.867704	0.0914211	0.607104	0.423287	0.0126186	-0.253771	0.147559	-0.448757	0.00776658	0.229525	0.19162	0.69891	4.27468e-06	0.127075	0.473888	-0.138888	0.433412	-0.590233	0.000238523	0.633399	5.80041e-05	0.0881466	0.620092	0.539212	0.000999779	-0.0744917	0.67544	-0.735468	7.23549e-07	-0.50047	0.00257524	0.196946	0.264248	-0.254634	0.14614
ENSG00000110422	HIPK3	10114	bisque4	-0.241428	0.168962	-0.145101	0.412914	0.0745448	0.675222	-0.562173	0.000539795	-0.510316	0.00204602	0.205558	0.243504	0.71761	1.78291e-06	0.497194	0.00277594	-0.54785	0.000796984	-0.424826	0.0122661	0.563843	0.000515234	0.153191	0.387062	0.122071	0.491614	-0.291089	0.0948739	-0.484917	0.00365404	-0.673164	1.28661e-05	0.0673007	0.705298	0.184851	0.295288
ENSG00000111581	NUP107	57122	bisque4	-0.121002	0.495444	-0.0768449	0.665772	-0.302425	0.0821343	-0.394376	0.0209988	-0.0128395	0.942547	0.0572649	0.747692	-0.19187	0.277002	0.620283	9.11287e-05	-0.316282	0.0684032	0.123413	0.486827	-0.417891	0.0139221	-0.31375	0.0707671	-0.757899	2.09503e-07	0.246472	0.159962	0.698305	4.3925e-06	-0.257513	0.141478	-0.599837	0.000177217	0.502168	0.00247628
ENSG00000143257	NR1I3	9970	bisque4	-0.143353	0.418623	-0.172269	0.329943	-0.5203	0.0016089	-0.0116509	0.947858	0.111395	0.530527	0.14844	0.402128	-0.470676	0.0049648	0.213863	0.224561	-0.0754306	0.671576	0.484396	0.00369612	-0.633405	5.7992e-05	-0.365909	0.0333189	-0.644463	3.89784e-05	-0.0141615	0.936643	0.697087	4.63859e-06	0.212188	0.228296	-0.4066	0.0170184	0.550118	0.000750167
ENSG00000262372	RP11-669E14.6	NA	bisque4	-0.120961	0.49559	-0.0730701	0.681306	-0.285387	0.101826	-0.247504	0.158166	-0.0757292	0.670349	-0.0810177	0.648757	-0.244212	0.163952	0.612507	0.000117994	-0.224325	0.202158	0.163238	0.356301	-0.458949	0.00633016	-0.403009	0.0181161	-0.72272	1.3871e-06	0.157138	0.374797	0.709625	2.61144e-06	-0.258657	0.139657	-0.690092	6.31311e-06	0.531687	0.00121215
ENSG00000139631	CSAD	51380	bisque4	0.0350841	0.843842	-0.194494	0.270361	-0.312976	0.0715027	-0.0576477	0.746061	0.195889	0.266872	-0.176031	0.319327	-0.55739	0.000616008	0.442973	0.00869908	-0.0283863	0.873385	0.369023	0.0317357	-0.710924	2.45626e-06	-0.302645	0.0819005	-0.814117	4.73677e-09	0.161097	0.362728	0.944259	5.34813e-17	-0.0135488	0.939379	-0.716923	1.8434e-06	0.501962	0.00248813
ENSG00000119787	ATL2	64225	bisque4	0.408312	0.0165151	0.188947	0.284525	-0.193004	0.274119	0.419016	0.0136413	0.673661	1.26082e-05	-0.505678	0.00228216	-0.828116	1.50669e-09	0.0281839	0.874281	0.0318271	0.858185	0.791483	2.49967e-08	-0.862267	5.64057e-11	-0.387681	0.0234874	-0.787346	3.3144e-08	-0.0807907	0.649678	0.852168	1.62157e-10	0.281801	0.106392	-0.344884	0.0457664	0.584278	0.000285438
ENSG00000158850	B4GALT3	8703	bisque4	0.0405738	0.81978	-0.230813	0.189071	-0.256146	0.143677	0.440277	0.00916518	0.180433	0.307182	-0.145102	0.41291	-0.639524	4.66361e-05	-0.271012	0.121063	0.598716	0.000183559	0.334118	0.0534503	-0.623374	8.2076e-05	-0.0582803	0.743368	-0.191674	0.277503	0.103134	0.561625	0.59483	0.000207148	0.537368	0.00104852	-0.368479	0.0320079	-0.0981924	0.580621
ENSG00000178127	NDUFV2	4729	bisque4	0.479869	0.00407949	0.0295494	0.868242	-0.108964	0.539594	0.366625	0.0329494	0.572046	0.000408372	-0.431289	0.0108757	-0.790992	2.5856e-08	0.114658	0.518478	0.0103111	0.953847	0.702311	3.66405e-06	-0.820098	2.93883e-09	-0.231251	0.188208	-0.757255	2.17486e-07	0.00801775	0.964105	0.845319	3.17778e-10	0.14426	0.415657	-0.435229	0.0100954	0.598218	0.000186439
ENSG00000100263	RHBDD3	25807	bisque4	0.177334	0.315702	-0.211735	0.229315	0.043417	0.80738	0.330475	0.056271	0.186978	0.289667	-0.0536131	0.763308	-0.463931	0.0057152	-0.134818	0.44714	0.588952	0.000247989	0.107318	0.545773	-0.460846	0.00608962	-0.0223886	0.899986	-0.029182	0.869866	0.076236	0.668268	0.401663	0.0185425	0.318341	0.066526	-0.393252	0.0214007	-0.0832693	0.639647
ENSG00000116852	KIF21B	23046	bisque4	-0.0328839	0.853525	-0.107069	0.54671	-0.251354	0.151586	0.257456	0.141569	0.135849	0.443641	-0.135557	0.44463	-0.547347	0.000807696	0.10099	0.569833	0.337425	0.0509879	0.334672	0.0530316	-0.652111	2.93386e-05	-0.143132	0.419351	-0.410202	0.0159737	0.14822	0.402832	0.66424	1.83913e-05	0.297078	0.0879676	-0.559487	0.000581503	0.274591	0.116039
ENSG00000179698	KIAA1875	NA	bisque4	0.0993905	0.57599	-0.226644	0.197409	-0.176922	0.316846	0.154243	0.38377	0.228575	0.193515	-0.20575	0.243056	-0.599241	0.000180562	0.202336	0.251134	0.308644	0.0757296	0.299466	0.0853244	-0.710994	2.44824e-06	-0.247966	0.157365	-0.545529	0.000847537	0.104023	0.558242	0.830914	1.18374e-09	0.172481	0.329338	-0.678253	1.04376e-05	0.267221	0.126561
ENSG00000039650	PNKP	11284	bisque4	-0.112416	0.526743	-0.286686	0.100209	-0.0894264	0.615002	0.127717	0.471639	-0.11054	0.533708	-0.10331	0.560956	-0.350743	0.041973	0.0725948	0.683272	0.546395	0.000828345	-0.0760058	0.669213	-0.377184	0.0278766	0.0816214	0.646309	-0.101768	0.566847	0.264832	0.130119	0.520521	0.00160024	0.167909	0.342514	-0.606507	0.000143367	-0.185526	0.293495
ENSG00000225828	FAM229A	100128071	bisque4	0.366318	0.033107	-0.0310338	0.861685	0.0171877	0.92314	0.370988	0.0307691	0.425652	0.0120805	-0.42225	0.0128607	-0.700436	3.99e-06	0.11765	0.507549	0.357793	0.0377484	0.399685	0.0191844	-0.758265	2.05088e-07	-0.195831	0.267016	-0.515814	0.00179401	0.093599	0.59853	0.771127	9.46305e-08	0.166243	0.347394	-0.60297	0.000160518	0.287067	0.0997387
ENSG00000167549	CORO6	84940	bisque4	0.269984	0.122537	-0.067217	0.705649	0.129195	0.466485	0.0906062	0.610325	0.166689	0.346083	-0.224536	0.201722	-0.398601	0.0195436	0.280263	0.108398	0.200343	0.255932	0.085742	0.629702	-0.457645	0.00650028	-0.146119	0.409608	-0.35856	0.0373106	0.162383	0.35886	0.571304	0.000417148	-0.0854952	0.630692	-0.613674	0.000113556	0.179228	0.310478
ENSG00000181800	CELF2-AS1	414196	bisque4	0.346887	0.0444394	0.0053073	0.976235	-0.0573432	0.747359	0.157019	0.375162	0.328309	0.0580035	-0.350613	0.0420544	-0.526003	0.00139788	0.381046	0.0261896	-0.151113	0.39361	0.509339	0.0020939	-0.662721	1.95216e-05	-0.200967	0.254424	-0.718608	1.69838e-06	-0.0679505	0.702582	0.712167	2.31583e-06	-0.123748	0.485638	-0.535938	0.00108777	0.731179	9.04288e-07
ENSG00000113119	TMCO6	55374	bisque4	-0.252391	0.149849	-0.0846517	0.634079	-0.0891103	0.616257	-0.318599	0.0662937	-0.311626	0.0727995	0.131019	0.460159	0.0122758	0.945065	0.476855	0.00435339	0.0399579	0.822472	-0.274582	0.116052	-0.133584	0.451346	-0.280631	0.107916	-0.259984	0.137564	0.340302	0.0489202	0.3976	0.0198807	-0.248264	0.15685	-0.629637	6.61684e-05	0.0323849	0.855725
ENSG00000205885	C1RL-AS1	283314	bisque4	0.0474934	0.789682	-0.208944	0.235655	-0.436758	0.00980556	0.153749	0.385313	0.329262	0.0572359	-0.268289	0.124994	-0.706616	3.00555e-06	0.151671	0.391844	0.0319321	0.857721	0.598946	0.000182243	-0.759027	1.96161e-07	-0.144259	0.41566	-0.767748	1.16498e-07	0.0731059	0.681158	0.898493	5.59667e-13	0.240204	0.171199	-0.449934	0.00758768	0.474605	0.00456797
ENSG00000157992	KRTCAP3	200634	bisque4	0.0289949	0.870693	-0.134112	0.449543	-0.11103	0.531885	-0.0457002	0.797455	0.165613	0.349248	-0.0625307	0.725349	-0.386907	0.0237904	0.261635	0.134995	0.194723	0.269785	0.090797	0.60957	-0.472214	0.00480605	-0.184992	0.294912	-0.433392	0.010453	0.206391	0.241556	0.655425	2.5877e-05	0.0665108	0.708606	-0.571856	0.000410604	0.149691	0.398128
ENSG00000147162	OGT	8473	bisque4	0.0857394	0.629712	-0.152009	0.390779	-0.204169	0.246773	-0.11478	0.518032	0.164847	0.351513	-0.223915	0.203004	-0.475459	0.00448549	0.516642	0.00175849	-0.0698293	0.694747	0.265902	0.128516	-0.632692	5.94661e-05	-0.267697	0.125861	-0.793616	2.15582e-08	0.208788	0.236012	0.897289	6.69851e-13	-0.141984	0.423127	-0.743011	4.83707e-07	0.46415	0.00568942
ENSG00000181191	PJA1	64219	bisque4	-0.0644258	0.717361	0.301693	0.0829142	0.429052	0.011341	-0.188228	0.286395	-0.266508	0.127614	0.277063	0.112661	0.561262	0.000553629	0.0180817	0.919155	0.00494977	0.977836	-0.573508	0.000391547	0.531028	0.0012325	0.0128189	0.942639	0.5489	0.000775002	0.24505	0.162463	-0.608442	0.000134694	-0.258445	0.139992	0.164268	0.353233	-0.325809	0.0600551
ENSG00000120685	PROSER1	80209	bisque4	0.337482	0.0509467	-0.137264	0.438862	-0.225476	0.199791	0.665728	1.73416e-05	0.547548	0.00080341	-0.288369	0.0981438	-0.867815	3.04587e-11	-0.307798	0.0765774	0.50399	0.00237376	0.735903	7.07195e-07	-0.875076	1.30237e-11	-0.0848775	0.633172	-0.393789	0.0212076	-0.16862	0.340443	0.676171	1.13757e-05	0.601843	0.000166351	-0.28489	0.102451	0.305569	0.078846
ENSG00000119402	FBXW2	26190	bisque4	-0.0300997	0.86581	-0.164104	0.353719	-0.159892	0.366377	-0.329255	0.0572421	-0.0739745	0.677572	-0.132181	0.456157	-0.0693901	0.696576	0.510319	0.00204586	-0.352675	0.0407788	0.0663183	0.709413	-0.165005	0.351045	0.104532	0.556306	-0.547242	0.000809954	0.0732807	0.680436	0.448933	0.00773968	-0.371623	0.0304617	-0.401084	0.0187285	0.428802	0.0113942
ENSG00000101846	STS	412	bisque4	-0.0960387	0.588989	-0.0108621	0.951384	0.0284605	0.873057	0.0450686	0.800197	-0.178549	0.312343	0.0644474	0.71727	0.331779	0.0552482	-0.292197	0.0935666	-0.0532639	0.764807	-0.100405	0.572082	0.463354	0.00578376	0.355248	0.0392316	0.466549	0.00541314	-0.376814	0.0280428	-0.621372	8.78424e-05	0.0118005	0.947189	0.522428	0.00152712	-0.216874	0.217946
ENSG00000095574	IKZF5	64376	bisque4	0.404591	0.0176254	0.15613	0.377906	-0.244391	0.163633	0.466685	0.00539777	0.771103	9.47707e-08	-0.420981	0.0131625	-0.884556	3.95434e-12	-0.104545	0.556256	0.0327379	0.854169	0.872697	1.73025e-11	-0.87182	1.91835e-11	-0.306079	0.0783225	-0.759944	1.85896e-07	-0.0212074	0.905238	0.827356	1.6075e-09	0.431083	0.010918	-0.207354	0.239319	0.566787	0.000474326
ENSG00000107404	DVL1	1855	bisque4	0.203422	0.248545	-0.0597106	0.737289	0.0247028	0.889708	0.556335	0.000634055	0.328899	0.0575275	-0.350004	0.0424367	-0.618394	9.70908e-05	-0.286384	0.100584	0.699771	4.11191e-06	0.28806	0.0985209	-0.567031	0.00047107	-0.0747913	0.674207	-0.0379583	0.831225	-0.0360934	0.839407	0.450326	0.00752891	0.474422	0.0045859	-0.325326	0.0604579	-0.111093	0.531651
ENSG00000224195	RP11-574K11.5	NA	bisque4	-0.0719933	0.685762	-0.0447605	0.801536	-0.290931	0.0950623	-0.120785	0.496223	0.0870902	0.624306	-0.174524	0.323555	-0.385225	0.0244594	0.444656	0.00841849	-0.0773682	0.663628	0.241161	0.169448	-0.528726	0.00130599	-0.163175	0.356489	-0.68458	8.00122e-06	0.176378	0.318359	0.741706	5.19091e-07	-0.0623962	0.725917	-0.610371	0.000126522	0.43216	0.0106989
ENSG00000159479	MED8	112950	bisque4	-0.246917	0.159185	-0.113924	0.521177	0.12636	0.476402	-0.1527	0.388603	-0.332167	0.0549465	0.375563	0.0286106	0.542209	0.000924789	-0.295339	0.0899321	0.120157	0.498482	-0.487154	0.00347816	0.596872	0.000194432	0.00946041	0.957651	0.666749	1.66536e-05	0.0147963	0.933809	-0.685174	7.80122e-06	0.00583775	0.973861	0.456901	0.00659893	-0.589345	0.00024505
ENSG00000188549	C15orf52	388115	bisque4	0.137584	0.437784	-0.265739	0.128759	0.0432936	0.807917	-0.0384118	0.829238	0.0624014	0.725895	-0.170873	0.333935	-0.277546	0.112009	0.412298	0.0153907	0.156759	0.375965	0.00231142	0.989649	-0.426102	0.0119805	-0.221123	0.208841	-0.418594	0.013746	0.104953	0.554708	0.58059	0.000318458	-0.18287	0.300583	-0.682314	8.80666e-06	0.18924	0.283765
ENSG00000228486	LINC01125	728537	bisque4	0.0272717	0.878319	-0.154749	0.382192	-0.249856	0.154121	-0.148148	0.403064	0.116278	0.512546	-0.140942	0.426574	-0.4095	0.016173	0.495576	0.00288003	-0.182227	0.302316	0.275649	0.114583	-0.551541	0.000722046	-0.182401	0.301846	-0.757914	2.09323e-07	0.140022	0.429629	0.791611	2.47762e-08	-0.161524	0.361441	-0.609226	0.000131318	0.498162	0.00271526
ENSG00000241058	NSUN6	221078	bisque4	0.0890577	0.616466	-0.233177	0.184453	-0.311226	0.0731877	-0.0580609	0.744301	0.211648	0.229511	-0.189573	0.282904	-0.507045	0.0022102	0.450755	0.00746495	-0.144344	0.415382	0.431836	0.0107645	-0.672217	1.33706e-05	-0.161396	0.361827	-0.820522	2.83928e-09	0.0150908	0.932494	0.850462	1.9233e-10	-0.0738982	0.677887	-0.59188	0.000226821	0.58011	0.000323002
ENSG00000274963	Metazoa_SRP	NA	bisque4	-0.00963517	0.95687	-0.144992	0.413268	-0.45328	0.00709815	-0.0268963	0.879982	0.207005	0.240129	-0.0593737	0.738719	-0.457943	0.00646105	0.331951	0.055114	-0.286972	0.0998566	0.573647	0.00038998	-0.596312	0.00019785	-0.264617	0.130443	-0.764994	1.37663e-07	-0.227043	0.196599	0.691582	5.91611e-06	0.0419261	0.813876	-0.361114	0.0358817	0.758196	2.05912e-07
ENSG00000187715	KBTBD12	166348	bisque4	0.0711741	0.689158	-0.0142062	0.936443	-0.352661	0.0407873	0.264444	0.130702	0.225481	0.199781	0.0114264	0.948861	-0.57065	0.000425032	0.00129768	0.994189	0.172929	0.328064	0.507628	0.00218013	-0.650933	3.06671e-05	-0.359734	0.0366482	-0.470373	0.00499654	-0.0368644	0.836022	0.604064	0.000155025	0.344149	0.0462607	-0.356136	0.0387087	0.381382	0.0260467
ENSG00000268030	AC005253.2	NA	bisque4	0.0736468	0.678924	-0.120507	0.497221	-0.124711	0.482221	-0.0198209	0.911408	0.154711	0.38231	-0.284923	0.102409	-0.477023	0.00433765	0.333552	0.0538808	0.0164043	0.926634	0.213303	0.225804	-0.542326	0.000921951	-0.0714053	0.688199	-0.613608	0.000113803	0.324153	0.0614452	0.783599	4.25677e-08	-0.0430899	0.808804	-0.600146	0.000175504	0.278751	0.110397
ENSG00000164211	STARD4	134429	bisque4	-0.0895256	0.614608	-0.0795854	0.654578	-0.660332	2.14267e-05	0.29263	0.093059	0.518612	0.00167648	-0.0208097	0.907007	-0.714251	2.09663e-06	-0.299563	0.0852183	0.0614893	0.72975	0.811012	6.02846e-09	-0.682693	8.66711e-06	-0.187063	0.289445	-0.568619	0.000450352	-0.118589	0.504143	0.65092	3.06821e-05	0.700241	4.02537e-06	0.0632853	0.722164	0.376255	0.0282954
ENSG00000129473	BCL2L2	599	bisque4	0.174386	0.323944	-0.295716	0.0895034	-0.347535	0.0440174	0.193811	0.272078	0.328431	0.0579048	-0.275329	0.115022	-0.674966	1.19529e-05	0.211558	0.229713	0.0955032	0.591077	0.567911	0.000459481	-0.779182	5.6819e-08	-0.112281	0.527242	-0.733014	8.22448e-07	-0.0762798	0.668089	0.859348	7.71768e-11	0.169486	0.337935	-0.539921	0.000981562	0.487832	0.00342631
ENSG00000258820	RP11-293M10.2	NA	bisque4	0.163972	0.354111	-0.147705	0.404488	-0.14969	0.39813	0.0387155	0.827908	0.172552	0.329136	-0.261263	0.13557	-0.453512	0.00706519	0.323546	0.0619609	-0.0656612	0.712169	0.325322	0.0604608	-0.565433	0.00049276	-0.108374	0.541804	-0.640694	4.47082e-05	0.036091	0.839417	0.718987	1.66718e-06	-0.0844818	0.634763	-0.507339	0.00219499	0.437326	0.00969963
ENSG00000111540	RAB5B	5869	bisque4	-0.318212	0.0666423	-0.0736094	0.679079	0.290046	0.0961186	-0.557879	0.0006078	-0.687671	7.01007e-06	0.350224	0.0422985	0.923354	7.50203e-15	0.239616	0.172281	-0.266598	0.127482	-0.82595	1.81077e-09	0.900395	4.1935e-13	0.315996	0.0686672	0.61852	9.66847e-05	-0.00573806	0.974307	-0.811491	5.80983e-09	-0.577368	0.000350052	0.233853	0.183147	-0.40545	0.0173638
ENSG00000185946	RNPC3	55599	bisque4	0.0535297	0.763666	-0.0963724	0.587689	-0.360872	0.0360149	0.0128732	0.942396	0.327139	0.0589568	-0.266601	0.127477	-0.615887	0.000105547	0.238306	0.17471	-0.0873578	0.623237	0.481235	0.0039603	-0.663125	1.92145e-05	-0.213983	0.224293	-0.80649	8.49878e-09	0.212665	0.227229	0.897537	6.45689e-13	0.131047	0.460064	-0.471603	0.00486862	0.431037	0.0109274
ENSG00000279933	RP4-671O14.5	NA	bisque4	0.201371	0.253449	0.0154807	0.930754	-0.193102	0.27387	0.139336	0.431916	0.368161	0.0321677	-0.209678	0.233976	-0.627236	7.19048e-05	0.218429	0.214583	0.0459948	0.796177	0.46637	0.00543338	-0.718404	1.71531e-06	-0.284258	0.103247	-0.67888	1.0169e-05	0.116415	0.512046	0.816449	3.94045e-09	0.113738	0.521863	-0.510435	0.00204028	0.449473	0.00765739
ENSG00000274808	TBC1D3B	414059	bisque4	-0.211225	0.230465	-0.242342	0.167306	-0.354636	0.0395955	-0.142042	0.422938	-0.114242	0.520008	0.0128494	0.942503	-0.304484	0.0799695	0.472554	0.00477158	0.0613861	0.730187	0.162358	0.358933	-0.504956	0.00232097	-0.137079	0.439484	-0.555251	0.000653066	0.0538418	0.762328	0.681891	8.96506e-06	-0.0837481	0.637716	-0.703232	3.51303e-06	0.406261	0.0171196
ENSG00000158042	MRPL17	63875	bisque4	-0.0106821	0.952189	-0.00491827	0.977977	0.552093	0.000711397	-0.381429	0.026027	-0.495288	0.00289886	0.336019	0.052024	0.771314	9.35369e-08	0.153362	0.386523	-0.0664019	0.709062	-0.813136	5.11435e-09	0.742264	5.03683e-07	0.193539	0.272765	0.669765	1.47621e-05	0.0887268	0.617782	-0.750051	3.28001e-07	-0.525734	0.00140726	0.126249	0.476791	-0.444491	0.0084456
ENSG00000026652	AGPAT4	56895	bisque4	0.0358957	0.840275	-0.152324	0.389786	-0.274622	0.115997	-0.0370104	0.835381	0.160708	0.363905	-0.232289	0.186179	-0.430879	0.0109599	0.363025	0.0348414	-0.168035	0.342145	0.375462	0.0286572	-0.492449	0.00309074	-0.0998693	0.574144	-0.667736	1.60119e-05	-0.0720003	0.685733	0.709238	2.65931e-06	-0.0674691	0.704594	-0.489425	0.00330716	0.535488	0.00110037
ENSG00000106333	PCOLCE	5118	bisque4	-0.0789251	0.657268	0.0357004	0.841133	0.0581216	0.744043	-0.0583154	0.743218	-0.168449	0.340942	-0.12421	0.483997	-0.12964	0.464936	0.225176	0.200406	0.262001	0.134429	-0.231048	0.188608	-0.173575	0.326233	-0.0795865	0.654573	-0.134035	0.449807	0.454199	0.00696844	0.387484	0.0235643	-0.0918043	0.605592	-0.552078	0.000711678	-0.213728	0.224859
ENSG00000134815	DHX34	9704	bisque4	-0.190688	0.28003	-0.16617	0.347608	-0.636079	5.27541e-05	0.369335	0.0315808	0.354796	0.0395003	-0.050767	0.775544	-0.708783	2.71665e-06	-0.223569	0.203722	0.292968	0.0926645	0.716657	1.86727e-06	-0.752954	2.7841e-07	-0.251494	0.151351	-0.477087	0.00433174	-0.16706	0.344996	0.666261	1.69795e-05	0.688628	6.72666e-06	-0.179903	0.308629	0.361379	0.0357358
ENSG00000100307	CBX7	23492	bisque4	-0.113538	0.522598	-0.0887228	0.617798	0.0552582	0.756262	-0.29566	0.0895676	-0.275367	0.114971	0.0224476	0.899723	0.0428416	0.809886	0.559736	0.000577517	0.0715948	0.687413	-0.323207	0.0622509	-0.129773	0.464476	-0.0987905	0.578307	-0.243983	0.164359	0.238808	0.173777	0.360341	0.0363091	-0.369753	0.0313739	-0.714982	2.02437e-06	0.0661503	0.710117
ENSG00000141404	GNAL	2774	bisque4	-0.112608	0.526032	-0.0396212	0.823944	-0.174241	0.32435	-0.311369	0.0730485	-0.149975	0.397222	0.0642549	0.71808	-0.110327	0.534502	0.553056	0.00069313	-0.120794	0.49619	-0.0329821	0.853093	-0.330676	0.0561124	-0.507232	0.00220053	-0.53518	0.00110909	0.223545	0.203771	0.555385	0.000650688	-0.271193	0.120805	-0.659424	2.21933e-05	0.319577	0.0654184
ENSG00000198089	SFI1	9814	bisque4	-0.0182611	0.918356	-0.209908	0.233453	-0.353534	0.0402572	-0.00338984	0.98482	0.162961	0.357128	-0.142064	0.422866	-0.566323	0.00048057	0.388804	0.0230537	0.0834904	0.638755	0.368693	0.0319006	-0.726021	1.17604e-06	-0.258384	0.140089	-0.737655	6.44711e-07	0.0406784	0.819323	0.910824	7.71655e-14	0.0695781	0.695793	-0.72114	1.49997e-06	0.460581	0.00612277
ENSG00000089335	ZNF302	55900	bisque4	0.0880267	0.62057	-0.0992486	0.576537	0.195572	0.267662	-0.420001	0.0133994	-0.217667	0.216228	-0.158155	0.371674	0.116438	0.511961	0.72603	1.17551e-06	-0.289655	0.0965876	-0.30211	0.082469	-0.0576351	0.746115	-0.174761	0.322888	-0.423481	0.0125737	0.323914	0.0616478	0.368223	0.0321366	-0.65678	2.45711e-05	-0.638564	4.82725e-05	0.195979	0.266648
ENSG00000137764	MAP2K5	5607	bisque4	-0.193723	0.272302	-0.0264359	0.882022	0.239937	0.17169	-0.0573445	0.747353	-0.395134	0.0207313	-0.0117822	0.947271	0.53571	0.00109414	-0.21588	0.220115	0.0858624	0.629219	-0.517338	0.00172913	0.678863	1.01761e-05	0.543978	0.00088288	0.66842	1.55805e-05	0.0255454	0.88597	-0.694297	5.25075e-06	-0.137256	0.438888	0.399658	0.0191932	-0.585609	0.00027429
ENSG00000137161	CNPY3	10695	bisque4	-0.0200776	0.910265	0.272399	0.119097	0.382375	0.0256288	0.13786	0.436858	-0.0745225	0.675314	0.0756417	0.670709	0.435923	0.00996285	-0.571069	0.000419973	0.184307	0.296734	-0.398621	0.0195371	0.671029	1.40293e-05	0.290168	0.0959723	0.861748	5.96704e-11	0.0210308	0.906024	-0.852568	1.55754e-10	0.158757	0.369834	0.708023	2.81499e-06	-0.709905	2.57718e-06
ENSG00000257176	RP11-996F15.2	100506606	bisque4	-0.130603	0.461597	-0.277986	0.111419	-0.304409	0.0800475	-0.177456	0.315363	0.0304039	0.864466	0.025412	0.886561	-0.313448	0.071054	0.468748	0.00517009	-0.101561	0.567644	0.226639	0.197419	-0.514304	0.00186036	-0.204124	0.24688	-0.614159	0.000111756	0.150088	0.396864	0.68288	8.59906e-06	-0.0681713	0.701659	-0.581534	0.000309698	0.503054	0.00242596
ENSG00000145041	VPRBP	9730	bisque4	0.385447	0.0243703	0.0199232	0.910953	-0.168936	0.339527	0.498571	0.00268998	0.646061	3.67556e-05	-0.335371	0.0525066	-0.835604	7.82197e-10	-0.0935002	0.598918	0.294046	0.0914146	0.715954	1.93181e-06	-0.907214	1.41801e-13	-0.426862	0.0118128	-0.61587	0.000105606	-0.0291593	0.869966	0.799238	1.44763e-08	0.431477	0.0108373	-0.372155	0.0302062	0.440845	0.00906525
ENSG00000213071	LPAL2	80350	bisque4	0.00976316	0.956298	-0.140968	0.426488	-0.197845	0.262031	-0.269721	0.122916	0.0677889	0.703257	-0.171177	0.333064	-0.292431	0.0932917	0.530757	0.00124096	-0.290055	0.0961078	0.172329	0.329771	-0.40335	0.0180093	-0.194292	0.270868	-0.733266	8.11716e-07	0.27537	0.114966	0.720894	1.51821e-06	-0.260688	0.136464	-0.556437	0.000632281	0.447127	0.00802035
ENSG00000156471	PTDSS1	9791	bisque4	0.0545558	0.759268	0.194581	0.270142	0.434705	0.0101964	0.10904	0.539309	-0.187307	0.288803	-0.0727965	0.682437	0.514773	0.00183953	-0.436994	0.00976142	0.0716942	0.687001	-0.421967	0.0129275	0.729639	9.78685e-07	0.341353	0.0481823	0.807893	7.6473e-09	-0.0317322	0.858603	-0.883393	4.60192e-12	-0.0736255	0.679012	0.649595	3.22402e-05	-0.638848	4.77839e-05
ENSG00000259248	USP3-AS1	NA	bisque4	0.343684	0.0465761	0.0339499	0.848831	-0.178395	0.312769	0.210114	0.232983	0.483948	0.00373261	-0.341732	0.0479182	-0.67451	1.2178e-05	0.262147	0.134204	-0.143601	0.417811	0.661258	2.06687e-05	-0.791662	2.46899e-08	-0.321562	0.0636712	-0.828181	1.4984e-09	-0.0239753	0.892937	0.835659	7.78354e-10	0.0533283	0.764531	-0.456569	0.00664342	0.730238	9.4914e-07
ENSG00000204620	RP11-1148L6.9	NA	bisque4	0.0432294	0.808197	-0.244967	0.162612	-0.36713	0.0326908	0.103549	0.560046	0.241679	0.168505	-0.133301	0.452316	-0.555355	0.000651224	0.217222	0.217189	0.073917	0.67781	0.480137	0.00405587	-0.709041	2.68397e-06	-0.201879	0.252229	-0.652976	2.83965e-05	-0.188967	0.284475	0.774326	7.74662e-08	0.191183	0.27876	-0.499381	0.00264052	0.515728	0.00179772
ENSG00000148730	EIF4EBP2	1979	bisque4	0.0344002	0.846849	0.210216	0.232752	0.21694	0.217803	0.352489	0.0408925	0.0362741	0.838613	-0.0931329	0.600361	0.193578	0.272668	-0.698286	4.39612e-06	0.298858	0.0859917	-0.135904	0.443454	0.452282	0.00724118	0.378174	0.0274358	0.720002	1.58632e-06	-0.0392588	0.82553	-0.68486	7.90648e-06	0.346255	0.0448547	0.69473	5.15122e-06	-0.622258	8.52459e-05
ENSG00000274213	RP11-670E13.6	NA	bisque4	-0.156027	0.378225	-0.270429	0.121897	-0.611893	0.000120389	0.179458	0.309847	0.284874	0.102471	-0.0602004	0.73521	-0.60113	0.000170141	-0.182144	0.30254	0.138047	0.436229	0.577276	0.000350991	-0.541854	0.000933389	-0.12384	0.485311	-0.465013	0.00558867	-0.133186	0.452708	0.608302	0.000135305	0.515645	0.00180133	-0.0669659	0.706699	0.203459	0.248456
ENSG00000166508	MCM7	4176	bisque4	0.0365185	0.83754	-0.017822	0.920313	0.219787	0.211676	-0.283269	0.104505	-0.146196	0.409358	-0.0778663	0.661591	0.0171603	0.923262	0.594545	0.000208981	0.0114178	0.9489	-0.337853	0.0506762	-0.127433	0.472636	-0.118236	0.505422	-0.26316	0.132653	0.296756	0.088329	0.379802	0.0267234	-0.436077	0.00993375	-0.69134	5.97902e-06	0.0756287	0.670762
ENSG00000141527	CARD14	79092	bisque4	0.0963626	0.587727	-0.125508	0.479403	-0.132343	0.455601	0.150526	0.39547	0.251557	0.151245	-0.298759	0.0861003	-0.514366	0.00185759	0.160205	0.365427	0.212547	0.227494	0.280231	0.10844	-0.584384	0.000284539	-0.461471	0.00601221	-0.496431	0.00282459	0.0675759	0.704147	0.712779	2.24934e-06	0.133372	0.45207	-0.547427	0.000805982	0.233978	0.182907
ENSG00000181619	GPR135	64582	bisque4	-0.0385107	0.828805	-0.158219	0.371479	-0.145271	0.41236	-0.300142	0.0845873	-0.1994	0.258222	-0.0103383	0.953726	-0.131066	0.459998	0.681731	9.02558e-06	-0.228188	0.194291	0.0137279	0.938579	-0.341227	0.0482702	-0.2476	0.157999	-0.604406	0.000153344	0.104695	0.555685	0.595491	0.000202951	-0.401345	0.0186444	-0.747358	3.81113e-07	0.481996	0.0038953
ENSG00000169032	MAP2K1	5604	bisque4	0.074161	0.676803	-0.00300278	0.986553	0.0878514	0.621268	0.204278	0.246516	0.0461031	0.795707	-0.00477548	0.978616	0.195294	0.268356	-0.484147	0.0037163	0.0843902	0.635131	0.00441627	0.980224	0.372984	0.0298115	0.345922	0.0450746	0.506964	0.0022144	-0.345422	0.0454065	-0.572365	0.000404643	0.169758	0.337148	0.635788	5.33023e-05	-0.301709	0.0828972
ENSG00000197818	SLC9A8	23315	bisque4	-0.0146205	0.934593	-0.37496	0.028888	-0.554598	0.000664764	0.318174	0.0666762	0.302745	0.0817946	-0.0707947	0.690733	-0.751659	2.99611e-07	-0.0399125	0.82267	0.263402	0.132283	0.68637	7.41261e-06	-0.843604	3.7417e-10	-0.0957888	0.589963	-0.609981	0.000128138	-0.156555	0.376594	0.819748	3.02357e-09	0.489749	0.00328336	-0.402299	0.0183401	0.465622	0.00551845
ENSG00000199477	SNORA31	677814	bisque4	0.0317823	0.858382	0.0284695	0.873017	-0.270211	0.12221	0.117862	0.50678	0.277836	0.11162	-0.314978	0.0696125	-0.478886	0.00416709	0.0557329	0.754232	-0.0369062	0.835838	0.423376	0.0125979	-0.50674	0.00222608	-0.0426605	0.810675	-0.568557	0.000451145	0.197537	0.262789	0.616368	0.000103878	0.163505	0.355502	-0.241272	0.169246	0.262405	0.133808
ENSG00000023445	BIRC3	330	bisque4	0.179327	0.310204	-0.203126	0.249248	-0.345425	0.0454046	0.182749	0.30091	0.325623	0.0602096	-0.117562	0.507868	-0.569633	0.000437552	0.116487	0.511783	-0.0195101	0.912792	0.59469	0.000208048	-0.654518	2.67861e-05	-0.1026	0.563665	-0.6078	0.000137517	-0.198354	0.260781	0.667988	1.58515e-05	0.21624	0.219328	-0.321023	0.0641422	0.536175	0.00108119
ENSG00000144535	DIS3L2	129563	bisque4	0.0246653	0.889874	-0.296679	0.0884156	-0.403169	0.0180661	0.222271	0.206429	0.267542	0.126087	-0.257685	0.141204	-0.666671	1.67053e-05	0.111549	0.529958	0.114061	0.520672	0.567105	0.000470089	-0.72106	1.50586e-06	-0.185788	0.292803	-0.636061	5.27881e-05	-0.0839342	0.636967	0.813349	5.03012e-09	0.250333	0.153311	-0.445561	0.00827077	0.433729	0.0103867
ENSG00000106780	MEGF9	1955	bisque4	-0.173478	0.326508	-0.223592	0.203673	0.269212	0.123651	-0.585171	0.000277913	-0.58514	0.000278171	0.281891	0.106276	0.791272	2.53618e-08	0.459073	0.00631427	-0.379192	0.0269888	-0.669413	1.49724e-05	0.69521	5.04278e-06	0.328268	0.0580365	0.341669	0.0479615	-0.0833207	0.63944	-0.578121	0.000342433	-0.713842	2.13816e-06	0.0423738	0.811924	-0.0966889	0.586457
ENSG00000198837	DENND4B	9909	bisque4	0.00815054	0.963511	-0.269635	0.123039	-0.34731	0.0441632	0.0860162	0.628603	0.200826	0.254763	-0.103	0.56214	-0.606186	0.000144851	0.33842	0.0502652	0.173254	0.327142	0.42159	0.0130171	-0.792144	2.38798e-08	-0.243666	0.164926	-0.689855	6.37847e-06	-0.0188802	0.915597	0.89614	7.93631e-13	0.145718	0.41091	-0.716228	1.9064e-06	0.508109	0.00215559
ENSG00000111615	KRR1	11103	bisque4	0.426594	0.0118718	0.149312	0.399337	-0.22868	0.193305	0.510655	0.00202962	0.772065	8.9267e-08	-0.372372	0.0301024	-0.896444	7.58912e-13	-0.151478	0.392456	0.153644	0.38564	0.842912	3.99462e-10	-0.898268	5.78891e-13	-0.31539	0.0692288	-0.693294	5.48832e-06	-0.0462759	0.794957	0.811498	5.80688e-09	0.4932	0.00303897	-0.233367	0.184085	0.499217	0.00265049
ENSG00000101166	SLMO2	51012	bisque4	0.217177	0.217288	0.457045	0.00657978	0.377551	0.0277127	0.14268	0.420836	0.16499	0.351089	-0.0819543	0.644961	0.299922	0.084826	-0.412056	0.0154572	-0.0634139	0.721622	-0.146158	0.409482	0.466553	0.00541265	0.0433649	0.807606	0.495567	0.00288061	0.00701133	0.968608	-0.650684	3.09541e-05	0.0718667	0.686286	0.65387	2.74526e-05	-0.348194	0.0435911
ENSG00000138131	LOXL4	84171	bisque4	0.0265145	0.881674	0.0521928	0.769407	-0.271708	0.120074	0.168155	0.341796	0.342743	0.0472191	-0.10822	0.542382	-0.499049	0.00266072	0.0904461	0.610959	0.0561048	0.752643	0.482829	0.00382514	-0.601609	0.000167588	-0.366669	0.0329264	-0.512609	0.00193739	-0.11013	0.535236	0.573716	0.000389203	0.274639	0.115973	-0.321039	0.0641281	0.531726	0.00121096
ENSG00000021574	SPAST	6683	bisque4	0.0838325	0.637376	0.161323	0.362046	0.203984	0.247212	-0.300295	0.0844206	-0.171576	0.331921	0.236584	0.17794	0.540128	0.000976292	0.252998	0.148839	-0.437897	0.00959428	-0.222944	0.205022	0.437293	0.0097058	0.057836	0.745259	0.157091	0.374942	-0.303782	0.0807019	-0.525329	0.00142151	-0.491309	0.00317082	0.23711	0.176948	0.157947	0.372311
ENSG00000172586	CHCHD1	118487	bisque4	-0.303823	0.0806589	-0.0128042	0.942705	0.260595	0.136609	-0.581201	0.000312767	-0.606619	0.000142852	0.34187	0.0478219	0.905982	1.73535e-13	0.141274	0.425474	-0.333865	0.0536427	-0.797232	1.67103e-08	0.945728	3.52611e-17	0.324642	0.0610316	0.600986	0.000170916	0.130754	0.461075	-0.820159	2.92438e-09	-0.528314	0.00131955	0.388348	0.0232291	-0.501908	0.00249124
ENSG00000188282	RUFY4	285180	bisque4	-0.111334	0.530755	-0.313937	0.0705908	-0.3563	0.0386128	-0.15646	0.376887	0.0431424	0.808575	0.279841	0.108952	-0.350604	0.0420597	0.411746	0.0155424	0.039373	0.82503	0.240342	0.170946	-0.61636	0.000103905	-0.499076	0.00265905	-0.57439	0.000381694	0.00268269	0.987986	0.697927	4.46744e-06	0.0516243	0.771852	-0.62564	7.59615e-05	0.490532	0.00322641
ENSG00000119760	SUPT7L	9913	bisque4	0.0740241	0.677368	-0.11481	0.51792	-0.365699	0.033428	0.105048	0.554347	0.358155	0.0375411	-0.252734	0.149277	-0.679027	1.0107e-05	0.216695	0.218336	0.0637497	0.720207	0.506145	0.00225731	-0.747905	3.69715e-07	-0.1627	0.35791	-0.766765	1.2368e-07	0.102913	0.56247	0.92372	6.96825e-15	0.196197	0.266107	-0.537935	0.00103332	0.425813	0.0120448
ENSG00000138617	PARP16	54956	bisque4	0.00232359	0.989594	0.295038	0.0902758	0.471145	0.00491595	-0.186284	0.291492	-0.29925	0.0855612	0.0809369	0.649084	0.557089	0.000621113	0.0806287	0.650336	-0.0714604	0.68797	-0.57653	0.000358718	0.514354	0.00185811	-0.077947	0.661261	0.470279	0.00500646	0.290733	0.0952974	-0.564645	0.000503785	-0.343969	0.0463825	0.139492	0.431394	-0.339274	0.0496514
ENSG00000227671	RP11-488L18.4	NA	bisque4	0.0376498	0.832577	-0.128158	0.4701	-0.310555	0.0738414	-0.11795	0.50646	0.186705	0.290383	-0.0932229	0.600007	-0.501884	0.00249262	0.508108	0.00215561	-0.116328	0.512362	0.36088	0.0360107	-0.703306	3.50122e-06	-0.368602	0.0319464	-0.847176	2.65641e-10	0.167425	0.343927	0.921012	1.19382e-14	-0.0672882	0.705351	-0.709338	2.64679e-06	0.569876	0.000434529
ENSG00000163959	SLC51A	200931	bisque4	0.0771506	0.664519	-0.229696	0.19128	-0.345809	0.0451496	0.193181	0.27367	0.271006	0.121072	-0.296371	0.0887629	-0.712244	2.30735e-06	0.125496	0.479445	0.17339	0.326757	0.493451	0.00302182	-0.756483	2.27431e-07	-0.0764527	0.66738	-0.669387	1.49884e-05	0.0921797	0.604112	0.911724	6.60482e-14	0.249916	0.15402	-0.552887	0.000696311	0.347752	0.0438764
ENSG00000213906	LTB4R2	56413	bisque4	0.405993	0.0171999	0.000753269	0.996627	0.0466211	0.79346	0.194618	0.270049	0.354158	0.0398813	-0.482402	0.00386092	-0.6107	0.000125176	0.364814	0.0338903	0.0675863	0.704104	0.381038	0.0261931	-0.698964	4.26429e-06	-0.0948637	0.593576	-0.688667	6.71519e-06	0.166674	0.346126	0.824078	2.11818e-09	-0.110672	0.533216	-0.690644	6.16335e-06	0.450641	0.0074819
ENSG00000198736	MSRB1	51734	bisque4	-0.344192	0.0462316	-0.14722	0.40605	0.269425	0.123343	-0.52805	0.0013283	-0.684325	8.08847e-06	0.432404	0.0106498	0.89154	1.53449e-12	0.150767	0.394705	-0.174066	0.324846	-0.830241	1.25494e-09	0.87559	1.2239e-11	0.325137	0.0606157	0.683316	8.44178e-06	0.0193551	0.913482	-0.81612	4.04482e-09	-0.47353	0.00467373	0.261474	0.135243	-0.461291	0.00603435
ENSG00000134146	DPH6	89978	bisque4	-0.281133	0.107261	0.0413894	0.816218	0.0884837	0.618749	-0.516322	0.00177212	-0.407715	0.0166892	0.210559	0.231972	0.643743	4.00186e-05	0.29226	0.093492	-0.541979	0.000930348	-0.42076	0.0132157	0.621511	8.7428e-05	0.12331	0.487195	0.179845	0.308786	0.0448281	0.801242	-0.492726	0.00307158	-0.502242	0.00247202	0.25876	0.139493	-0.0173563	0.922389
ENSG00000237522	NONOP2	NA	bisque4	0.22119	0.2087	-0.0187196	0.916313	-0.230369	0.189946	0.194139	0.271254	0.340473	0.0488	-0.152105	0.390475	-0.620923	8.91835e-05	0.268618	0.124514	-0.0409641	0.818075	0.595368	0.00020373	-0.77816	6.06878e-08	-0.362256	0.0352571	-0.716709	1.86258e-06	-0.122091	0.491542	0.776789	6.62597e-08	0.104401	0.556802	-0.530965	0.00123446	0.697096	4.63681e-06
ENSG00000269925	RP3-467L1.6	NA	bisque4	-0.0173936	0.922222	-0.22721	0.196263	-0.37327	0.0296766	-0.0133274	0.940368	0.119693	0.500153	-0.0832383	0.639772	-0.489755	0.00328291	0.442808	0.00872699	-0.0763047	0.667986	0.434174	0.0102995	-0.709722	2.59951e-06	-0.372743	0.0299256	-0.769483	1.04751e-07	0.0479264	0.787808	0.834644	8.52369e-10	-0.000591761	0.99735	-0.661789	2.02454e-05	0.644078	3.95316e-05
ENSG00000280011	RP4-671O14.7	NA	bisque4	0.274821	0.115721	0.034901	0.844646	-0.187508	0.288278	0.282365	0.105664	0.51306	0.00191663	-0.224767	0.201246	-0.731947	8.69184e-07	0.136966	0.439864	0.092733	0.601933	0.598339	0.000185737	-0.807961	7.60821e-09	-0.292918	0.0927225	-0.677329	1.08448e-05	0.0809417	0.649065	0.813867	4.83052e-09	0.263883	0.131552	-0.474537	0.00457466	0.528869	0.00130133
ENSG00000148481	FAM188A	80013	bisque4	0.100889	0.570219	-0.205601	0.243403	-0.359027	0.0370455	-0.0604992	0.733943	0.277018	0.112722	-0.143609	0.417786	-0.572671	0.000401102	0.453202	0.00710927	-0.178057	0.3137	0.502337	0.0024666	-0.739256	5.92078e-07	-0.339663	0.0493737	-0.902708	2.92909e-13	0.0418435	0.814237	0.927903	2.91379e-15	-0.03019	0.865411	-0.620328	9.09905e-05	0.667446	1.61978e-05
ENSG00000143612	C1orf43	25912	bisque4	-0.401917	0.0184615	-0.0795232	0.654831	0.067493	0.704494	-0.250437	0.153134	-0.500212	0.00259059	0.388205	0.0232842	0.721225	1.4937e-06	-0.329828	0.0567843	-0.0420522	0.813326	-0.561834	0.00054491	0.855896	1.1083e-10	0.337927	0.0506224	0.811031	6.01974e-09	-0.0758427	0.669883	-0.910256	8.50703e-14	-0.0358007	0.840692	0.66444	1.82471e-05	-0.650696	3.09401e-05
ENSG00000226137	BAIAP2-AS1	440465	bisque4	0.0372647	0.834266	0.283252	0.104527	0.596156	0.000198808	-0.254377	0.146561	-0.348772	0.0432195	0.119982	0.49911	0.711234	2.42058e-06	0.17264	0.328886	-0.0945848	0.594667	-0.699614	4.14115e-06	0.684052	8.18266e-06	0.0709704	0.690004	0.594982	0.000206173	0.0526616	0.767393	-0.733438	8.04517e-07	-0.507112	0.00220674	0.122363	0.490569	-0.325073	0.06067
ENSG00000134253	TRIM45	80263	bisque4	-0.160809	0.363598	-0.0759129	0.669595	-0.365265	0.0336541	-0.142858	0.420249	0.0166307	0.925624	-0.164758	0.351779	-0.322059	0.063239	0.32139	0.0638211	-0.186679	0.290454	0.241124	0.169516	-0.370955	0.0307848	-0.324292	0.0613272	-0.614233	0.000111483	0.326464	0.0595117	0.621886	8.63281e-05	-0.0226628	0.898767	-0.392002	0.021855	0.317367	0.0674083
ENSG00000229873	OGFR-AS1	101409261	bisque4	0.300048	0.0846892	0.026609	0.881255	-0.0201088	0.910126	0.357383	0.0379844	0.380556	0.0263988	-0.350086	0.0423849	-0.683131	8.50808e-06	0.043904	0.80526	0.39396	0.0211465	0.367751	0.032375	-0.711434	2.39771e-06	-0.0751809	0.672603	-0.452607	0.00719439	0.177446	0.31539	0.754455	2.55563e-07	0.236983	0.177187	-0.577669	0.000346987	0.19782	0.262092
ENSG00000264577	AC010761.8	NA	bisque4	0.114121	0.520453	0.010121	0.954697	-0.264176	0.131108	0.20619	0.242027	0.443859	0.00855032	-0.374508	0.0290973	-0.691224	6.0093e-06	0.0475333	0.789509	0.0991208	0.577031	0.509411	0.00209036	-0.700243	4.02506e-06	-0.180809	0.306158	-0.655806	2.5504e-05	0.170498	0.335013	0.84643	2.85564e-10	0.308422	0.0759517	-0.376923	0.0279938	0.302434	0.0821243
ENSG00000231177	LINC00852	84657	bisque4	0.249078	0.15545	0.0245817	0.890245	-0.245266	0.162083	0.469676	0.0050704	0.510968	0.00201461	-0.400004	0.0190797	-0.862043	5.77896e-11	-0.0699691	0.694165	0.296615	0.088488	0.692912	5.58123e-06	-0.883091	4.78562e-12	-0.304707	0.0797372	-0.626846	7.28774e-05	0.039269	0.825485	0.864124	4.60295e-11	0.427533	0.0116666	-0.449098	0.00771437	0.413467	0.0150735
ENSG00000228393	LINC01004	NA	bisque4	0.0655658	0.712569	-0.0577108	0.745793	-0.43977	0.00925529	0.255101	0.145376	0.423156	0.0126489	-0.201565	0.252982	-0.669129	1.51444e-05	-0.0237371	0.893995	0.0399843	0.822356	0.671371	1.38367e-05	-0.714256	2.09615e-06	-0.169113	0.339014	-0.649199	3.27202e-05	-0.0932849	0.599763	0.729679	9.76671e-07	0.384164	0.0248895	-0.22761	0.195454	0.458064	0.00644519
ENSG00000197580	BCO2	83875	bisque4	0.0599179	0.736409	-0.0251394	0.887771	-0.197177	0.263677	-0.19072	0.279948	0.0559077	0.753485	-0.00918415	0.958887	-0.298302	0.0866055	0.550041	0.000751703	-0.224318	0.202172	0.228798	0.193068	-0.507511	0.0021861	-0.362893	0.0349127	-0.710352	2.52348e-06	0.165942	0.348278	0.685995	7.53251e-06	-0.223891	0.203054	-0.624274	7.9597e-05	0.531748	0.00121027
ENSG00000016864	GLT8D1	55830	bisque4	-0.270171	0.122268	-0.00926941	0.958506	0.281729	0.106486	-0.72234	1.41351e-06	-0.623341	8.21672e-05	0.318494	0.0663883	0.896539	7.48391e-13	0.412579	0.0153142	-0.47552	0.00447966	-0.816732	3.85254e-09	0.875391	1.2537e-11	0.210911	0.231175	0.392701	0.0215998	0.124674	0.482354	-0.650632	3.10141e-05	-0.725002	1.23782e-06	0.156766	0.375944	-0.302136	0.0824415
ENSG00000174945	AMZ1	155185	bisque4	0.220791	0.209544	0.112239	0.527398	-0.300513	0.0841847	0.461003	0.00607016	0.516354	0.00177077	-0.204267	0.246544	-0.802321	1.15738e-08	-0.148813	0.400931	0.222685	0.205561	0.72484	1.24792e-06	-0.827174	1.63261e-09	-0.364284	0.0341701	-0.557191	0.000619372	0.0233889	0.895541	0.74688	3.91327e-07	0.506158	0.00225664	-0.302948	0.0815804	0.454542	0.00692056
ENSG00000114982	KANSL3	55683	bisque4	0.334012	0.0535311	0.0504729	0.776811	-0.25152	0.151307	0.484445	0.00369208	0.6548	2.65002e-05	-0.33045	0.0562912	-0.872054	1.86645e-11	-0.0916588	0.606165	0.175051	0.322072	0.797859	1.59798e-08	-0.89269	1.3049e-12	-0.355484	0.0390921	-0.673752	1.25615e-05	-0.0562302	0.752108	0.82737	1.60557e-09	0.446582	0.00810679	-0.331468	0.0554911	0.535365	0.00110385
ENSG00000280007	AC008079.10	NA	bisque4	0.185302	0.294089	-0.0749905	0.673386	-0.170457	0.335132	0.174101	0.324747	0.265504	0.129111	-0.31045	0.073945	-0.581912	0.00030625	0.272063	0.119571	0.0185955	0.916866	0.479123	0.00414586	-0.680505	9.50206e-06	-0.0523733	0.768632	-0.645622	3.73549e-05	-0.0133992	0.940047	0.760662	1.78202e-07	0.0376592	0.832536	-0.566994	0.000471562	0.555948	0.00064078
ENSG00000223745	RP4-717I23.3	NA	bisque4	0.0792758	0.655839	-0.0256214	0.885633	-0.233992	0.18288	-0.0257009	0.88528	0.230561	0.189566	-0.272535	0.118906	-0.546916	0.00081699	0.345902	0.0450879	-0.0331271	0.852454	0.319403	0.0655737	-0.617665	9.94855e-05	-0.142865	0.420227	-0.752443	2.86601e-07	0.34468	0.045903	0.882695	5.0371e-12	0.00422526	0.981079	-0.616644	0.000102929	0.349947	0.0424729
ENSG00000172765	TMCC1	23023	bisque4	-0.416066	0.0143878	-0.0164417	0.926467	-0.271508	0.120357	-0.47916	0.00414254	-0.283462	0.104259	0.402878	0.0181574	0.509493	0.00208628	0.220917	0.209276	-0.59602	0.000199648	-0.0925459	0.602669	0.438062	0.00956393	0.0780115	0.660998	0.0366612	0.836914	-0.330088	0.0565772	-0.408197	0.0165484	-0.229406	0.191856	0.362962	0.0348753	0.2396	0.172311
ENSG00000041802	LSG1	55341	bisque4	0.342436	0.0474302	0.173018	0.327813	-0.182429	0.301771	0.403697	0.0179013	0.653339	2.801e-05	-0.320537	0.0645689	-0.780801	5.11505e-08	-0.00951348	0.957414	0.145278	0.412338	0.709422	2.63648e-06	-0.855048	1.20973e-10	-0.382956	0.0253865	-0.669984	1.4633e-05	-0.084898	0.633089	0.785274	3.80859e-08	0.365896	0.0333257	-0.343334	0.0468147	0.528439	0.00131543
ENSG00000150477	KIAA1328	57536	bisque4	0.215914	0.220039	0.216069	0.219701	-0.215017	0.22201	0.0274595	0.877488	0.324641	0.0610327	-0.293658	0.0918625	-0.462315	0.00590881	0.362599	0.0350714	-0.362573	0.0350853	0.53958	0.000990292	-0.562095	0.000540977	-0.337745	0.050755	-0.793436	2.18314e-08	-0.0131817	0.941018	0.670572	1.42903e-05	-0.0855572	0.630443	-0.372389	0.0300944	0.714632	2.0587e-06
ENSG00000196668	LINC00173	100287569	bisque4	-0.0555819	0.754878	-0.0941743	0.596274	-0.388753	0.0230732	0.028765	0.87171	0.165015	0.351016	-0.0662429	0.709729	-0.576173	0.000362464	0.259976	0.137578	0.090053	0.612516	0.394984	0.0207838	-0.721556	1.46946e-06	-0.25043	0.153146	-0.682781	8.63509e-06	0.208176	0.237421	0.879398	7.6571e-12	0.184818	0.295375	-0.599636	0.000178336	0.394023	0.0211242
ENSG00000054116	TRAPPC3	27095	bisque4	-0.315099	0.0694994	-0.0597298	0.737207	0.214768	0.222557	-0.537632	0.00104141	-0.598793	0.000183118	0.473608	0.00466602	0.895169	9.1447e-13	0.113861	0.52141	-0.325309	0.0604717	-0.726671	1.13806e-06	0.904653	2.15105e-13	0.287889	0.0987297	0.633075	5.86689e-05	-0.023681	0.894244	-0.862213	5.67325e-11	-0.463834	0.00572673	0.419962	0.013409	-0.399549	0.0192291
ENSG00000198836	OPA1	4976	bisque4	0.195963	0.266687	0.0925211	0.602767	-0.0804438	0.651087	0.290023	0.096146	0.275061	0.115391	-0.200023	0.256709	-0.0770742	0.664832	-0.310934	0.0734722	-0.235669	0.179673	0.44343	0.00862211	0.0247122	0.889666	0.117788	0.507047	-0.0123181	0.944876	-0.394744	0.0208684	-0.243851	0.164594	0.146571	0.408146	0.529818	0.00127067	0.248616	0.156243
ENSG00000116161	CACYBP	27101	bisque4	-0.0776339	0.662541	0.245413	0.161823	0.39278	0.021571	-0.356977	0.0382191	-0.341803	0.0478686	0.306481	0.0779113	0.789933	2.78028e-08	0.0516156	0.77189	-0.306712	0.0776767	-0.594627	0.000208453	0.798617	1.51366e-08	0.142524	0.42135	0.594968	0.000206268	0.0236266	0.894485	-0.858832	8.15152e-11	-0.42324	0.0126295	0.450633	0.00748304	-0.312457	0.0719997
ENSG00000166974	MAPRE2	10982	bisque4	-0.118082	0.505982	0.212258	0.228139	0.166245	0.347387	0.164566	0.352347	-0.132918	0.453627	0.135138	0.446052	0.350086	0.0423852	-0.566203	0.000482207	0.202314	0.251186	-0.264848	0.130095	0.540686	0.000962244	0.271601	0.120225	0.741374	5.28478e-07	-0.0888803	0.617172	-0.741962	5.11978e-07	0.235668	0.179675	0.637565	5.00313e-05	-0.593891	0.00021324
ENSG00000164603	C7orf60	154743	bisque4	-0.31222	0.0722266	0.0468578	0.792435	-0.057627	0.74615	-0.547923	0.000795431	-0.347628	0.0439565	0.281543	0.106727	0.701489	3.80386e-06	0.209619	0.234111	-0.709913	2.57622e-06	-0.285653	0.101493	0.684878	7.90039e-06	0.0811828	0.648087	0.164409	0.352814	-0.197285	0.26341	-0.606753	0.000142237	-0.437343	0.00969655	0.503536	0.00239899	0.0484007	0.785757
ENSG00000093183	SEC22C	9117	bisque4	0.00117645	0.994731	0.155773	0.379011	-0.364307	0.0341581	0.142606	0.421079	0.336938	0.051345	-0.321062	0.0641077	-0.472353	0.00479194	-0.176924	0.316841	-0.105224	0.55368	0.47778	0.0042677	-0.344577	0.0459725	0.0425151	0.811308	-0.474776	0.00455143	0.215242	0.221513	0.485474	0.0036095	0.325079	0.0606643	0.0626564	0.724818	0.165585	0.349331
ENSG00000103490	PYCARD	29108	bisque4	-0.448408	0.00782034	-0.120816	0.496113	0.101516	0.567813	-0.32956	0.0569975	-0.569814	0.000435301	0.452284	0.00724089	0.764501	1.4181e-07	-0.228657	0.193352	-0.0249939	0.888416	-0.668858	1.53094e-05	0.876839	1.05127e-11	0.319521	0.0654689	0.822373	2.43964e-09	-0.034756	0.845284	-0.889943	1.91582e-12	-0.102812	0.562856	0.553657	0.000681949	-0.645285	3.78206e-05
ENSG00000166685	COG1	9382	bisque4	0.292117	0.0936607	-0.0566474	0.750326	-0.0374673	0.833378	0.345807	0.0451512	0.36292	0.0348979	-0.309083	0.0752923	-0.684475	8.03682e-06	0.1247	0.482258	0.335626	0.0523159	0.408453	0.016474	-0.781866	4.77098e-08	-0.167993	0.342269	-0.522783	0.00151383	0.142705	0.420752	0.801857	1.19737e-08	0.190904	0.279476	-0.645517	3.74991e-05	0.329617	0.0569526
ENSG00000143320	CRABP2	1382	bisque4	0.181898	0.303204	0.0843287	0.635378	-0.224146	0.202527	0.278049	0.111335	0.44462	0.00842442	-0.335353	0.0525203	-0.716998	1.83664e-06	0.110338	0.534458	0.11939	0.501246	0.586177	0.000269652	-0.787621	3.25328e-08	-0.239203	0.173044	-0.661926	2.01371e-05	0.00079991	0.996418	0.825493	1.88178e-09	0.264645	0.1304	-0.474254	0.00460236	0.502501	0.00245728
ENSG00000134531	EMP1	2012	bisque4	-0.138837	0.433582	-0.0138983	0.937818	-0.561232	0.000554095	0.378741	0.027186	0.466631	0.00540384	-0.0166926	0.925348	-0.660107	2.16141e-05	-0.486804	0.00350514	0.246863	0.15928	0.674851	1.20093e-05	-0.564764	0.000502106	-0.166656	0.34618	-0.306946	0.0774388	-0.106934	0.547219	0.493666	0.00300719	0.813335	5.03529e-09	0.156875	0.375608	0.136335	0.441995
ENSG00000126107	HECTD3	79654	bisque4	-0.0437858	0.805775	-0.249888	0.154068	-0.000674829	0.996978	-0.141446	0.424907	-0.129362	0.465904	-0.0111283	0.950194	-0.232144	0.186461	0.421931	0.012936	0.282965	0.104895	-0.164606	0.35223	-0.400902	0.0187874	-0.19016	0.281388	-0.323132	0.0623145	0.299589	0.0851903	0.619881	9.23692e-05	-0.1428	0.420443	-0.800684	1.30401e-08	0.0517031	0.771513
ENSG00000165915	SLC39A13	91252	bisque4	-0.166436	0.346824	-0.252921	0.148966	-0.126975	0.474242	0.0693657	0.696677	-0.0623989	0.725905	0.129132	0.466703	-0.302573	0.0819766	0.0317059	0.858719	0.49934	0.00264299	-0.0587995	0.741159	-0.404404	0.0176829	-0.187857	0.287365	-0.0881182	0.620205	0.291657	0.0942023	0.457049	0.0065793	0.279038	0.110015	-0.528373	0.00131761	-0.120943	0.495656
ENSG00000167112	TRUB2	26995	bisque4	-0.0262485	0.882853	0.311152	0.0732597	0.593433	0.000216269	-0.32617	0.0597552	-0.45667	0.00662997	0.0614228	0.730032	0.714643	2.05756e-06	0.15072	0.394856	-0.0872378	0.623717	-0.809526	6.75559e-09	0.742739	4.90898e-07	0.105738	0.551732	0.616611	0.000103042	0.246165	0.160501	-0.673247	1.28228e-05	-0.535076	0.00111203	0.125475	0.479519	-0.522342	0.00153035
ENSG00000264538	SUZ12P1	NA	bisque4	0.274704	0.115883	0.169084	0.339099	0.173205	0.327281	-0.147194	0.406134	0.192779	0.27469	-0.301696	0.0829112	-0.237793	0.175669	0.567496	0.000464914	-0.189102	0.284124	0.0542916	0.7604	-0.391887	0.021897	-0.358894	0.037121	-0.615926	0.000105413	0.247536	0.158109	0.593202	0.000217808	-0.384206	0.0248723	-0.634431	5.59298e-05	0.413023	0.0151935
ENSG00000099715	PCDH11Y	27328	bisque4	-0.0523126	0.768892	-0.153609	0.385752	-0.280079	0.108639	-0.00720562	0.967739	0.15464	0.382531	-0.0471676	0.791093	-0.42984	0.0111754	0.246334	0.160204	0.0297183	0.867495	0.316407	0.0682876	-0.556238	0.000635728	-0.0995566	0.575349	-0.552864	0.000696742	-0.0103781	0.953548	0.685101	7.82569e-06	0.117106	0.509529	-0.470276	0.00500682	0.420037	0.0133908
ENSG00000047230	CTPS2	56474	bisque4	-0.162116	0.359661	0.0392529	0.825555	0.241238	0.169307	-0.612823	0.000116777	-0.39288	0.021535	0.20472	0.245473	0.722764	1.38406e-06	0.431177	0.0108987	-0.545619	0.000845537	-0.582337	0.000302418	0.712235	2.30838e-06	0.0929122	0.601228	0.193593	0.27263	-0.0321343	0.856829	-0.509285	0.00209659	-0.655642	2.56635e-05	0.139219	0.432306	-0.0685594	0.700039
ENSG00000157693	C9orf91	203197	bisque4	-0.016789	0.924918	-0.216049	0.219745	0.210243	0.232689	-0.217431	0.216738	-0.389717	0.0227059	0.515553	0.00180532	0.498982	0.0026648	0.231166	0.188376	-0.0119672	0.946444	-0.379553	0.0268313	0.277187	0.112493	-0.00871011	0.961007	0.374021	0.0293237	-0.300334	0.0843789	-0.480176	0.00405239	-0.336019	0.0520238	-0.0490869	0.782791	0.0161768	0.927649
ENSG00000205045	SLFN12L	100506736	bisque4	0.058269	0.743416	0.0827559	0.64172	-0.189653	0.282696	0.100111	0.573215	0.373024	0.0297927	-0.294446	0.090954	-0.498287	0.00270753	0.0199795	0.910702	0.0200432	0.910419	0.327704	0.0584945	-0.437405	0.00968498	-0.0812718	0.647726	-0.519426	0.00164359	0.527394	0.00135028	0.616822	0.000102319	0.21412	0.223989	-0.223897	0.203043	0.118826	0.503286
ENSG00000104765	BNIP3L	665	bisque4	-0.0994628	0.575711	0.192593	0.275163	0.119647	0.500317	-0.131605	0.458138	-0.1812	0.305094	0.224978	0.200812	0.53357	0.00115557	-0.285937	0.10114	-0.271731	0.120041	-0.225775	0.19918	0.641065	4.41124e-05	0.153609	0.38575	0.518054	0.00169935	-0.107396	0.545479	-0.767673	1.17033e-07	-0.0741103	0.677012	0.700764	3.93111e-06	-0.292238	0.0935186
ENSG00000180549	FUT7	2529	bisque4	0.221752	0.207517	-0.0556122	0.754748	0.641333	4.3686e-05	-0.152239	0.390055	-0.331291	0.0556295	0.12952	0.465354	0.521141	0.00157615	0.116493	0.511762	0.170019	0.336394	-0.718735	1.68784e-06	0.52673	0.00137282	0.334942	0.0528285	0.594508	0.000209219	0.123262	0.487364	-0.55431	0.000669986	-0.45623	0.0066891	-0.0636945	0.720439	-0.462195	0.00592341
ENSG00000177406	RP11-218M22.1	100049716	bisque4	0.0177694	0.920547	0.233521	0.183788	0.378411	0.027331	-0.177063	0.316455	-0.309115	0.0752611	0.0830336	0.640598	0.536132	0.00108237	0.000986938	0.99558	-0.1702	0.335872	-0.483007	0.00381025	0.631971	6.09895e-05	0.16666	0.346168	0.479375	0.00412335	0.113608	0.522339	-0.631899	6.11443e-05	-0.360055	0.0364687	0.279493	0.109413	-0.283959	0.103627
ENSG00000126883	NUP214	8021	bisque4	-0.429414	0.0112646	-0.153753	0.385302	0.135872	0.44356	-0.373444	0.0295944	-0.670167	1.45255e-05	0.411993	0.0154745	0.821566	2.60698e-09	-0.0793156	0.655677	-0.0625272	0.725364	-0.723923	1.30645e-06	0.88111	6.16962e-12	0.349373	0.042836	0.77544	7.21969e-08	-0.0245527	0.890374	-0.872956	1.67796e-11	-0.266783	0.127207	0.416626	0.0142434	-0.575004	0.000374969
ENSG00000277496	RP11-93B14.9	NA	bisque4	-0.256554	0.143019	-0.00308288	0.986194	0.390544	0.0223949	-0.280583	0.107978	-0.572911	0.000398338	0.161132	0.362624	0.724229	1.28667e-06	0.0225708	0.899176	0.118955	0.50282	-0.820583	2.82509e-09	0.750487	3.20072e-07	0.212667	0.227223	0.727869	1.07107e-06	0.147577	0.4049	-0.709463	2.63138e-06	-0.343243	0.0468765	0.135405	0.445146	-0.64246	4.19351e-05
ENSG00000236337	FMR1-IT1	NA	bisque4	0.1954	0.268093	0.00615398	0.972445	-0.171472	0.33222	0.164272	0.35322	0.248141	0.157063	-0.168107	0.341935	-0.565929	0.000485933	0.30962	0.0747611	0.0666211	0.708144	0.45816	0.00643262	-0.75477	2.51003e-07	-0.454503	0.00692603	-0.666806	1.66157e-05	-0.0619558	0.727778	0.78269	4.51985e-08	0.0466606	0.793289	-0.65827	2.32046e-05	0.579367	0.000330141
ENSG00000248936	RP11-36B15.1	NA	bisque4	0.020745	0.907295	-0.153515	0.386045	-0.483536	0.00376644	0.0586631	0.741739	0.33533	0.052537	-0.26877	0.124292	-0.615424	0.00010718	0.201525	0.253078	-0.193746	0.272243	0.647303	3.51081e-05	-0.683417	8.40587e-06	-0.279547	0.109341	-0.823744	2.17789e-09	-0.161674	0.360988	0.832681	1.01417e-09	0.165689	0.349026	-0.328228	0.0580686	0.598436	0.000185177
ENSG00000275074	NUDT18	79873	bisque4	-0.382242	0.0256844	-0.21304	0.22639	0.172108	0.330403	-0.422601	0.0127784	-0.764729	1.39873e-07	0.444003	0.00852641	0.805315	9.27877e-09	0.127603	0.472038	-0.0343528	0.847058	-0.770655	9.74394e-08	0.789065	2.94988e-08	0.295544	0.089699	0.683801	8.27026e-06	-0.0315132	0.859569	-0.748218	3.63343e-07	-0.411723	0.0155488	0.140989	0.426418	-0.463343	0.00578498
ENSG00000145191	EIF2B5	8893	bisque4	0.0736529	0.678899	-0.104139	0.5578	-0.0274098	0.877708	-0.0234631	0.895211	0.0790959	0.656572	-0.301454	0.0831704	-0.410035	0.0160208	0.326376	0.0595844	0.161425	0.36174	0.0495072	0.780976	-0.474113	0.00461613	-0.159743	0.366829	-0.494486	0.002952	0.415316	0.014583	0.736394	6.8914e-07	-0.0815651	0.646537	-0.670265	1.44687e-05	0.0912096	0.607939
ENSG00000101194	SLC17A9	63910	bisque4	0.234378	0.182138	0.0275514	0.877081	-0.0329251	0.853344	0.368636	0.0319294	0.326085	0.0598254	-0.339551	0.0494539	-0.700053	4.05984e-06	0.0869616	0.62482	0.452082	0.00727025	0.341342	0.04819	-0.77039	9.90512e-08	-0.255495	0.144735	-0.459049	0.00631734	0.234198	0.182484	0.8028	1.11747e-08	0.252573	0.149544	-0.690066	6.3202e-06	0.199987	0.256794
ENSG00000235602	POU5F1P3	642559	bisque4	0.060808	0.732635	-0.15066	0.395046	-0.203209	0.249051	0.0545705	0.759205	0.164302	0.35313	-0.192659	0.274995	-0.53779	0.00103719	0.419244	0.0135852	0.15229	0.389893	0.298583	0.0862945	-0.729515	9.8492e-07	-0.250291	0.153383	-0.678514	1.03247e-05	0.124373	0.483419	0.878458	8.61023e-12	0.0253188	0.886975	-0.800221	1.34851e-08	0.462612	0.00587277
ENSG00000205138	SDHAF1	644096	bisque4	0.129736	0.464602	0.0946601	0.594372	0.711314	2.41141e-06	-0.176814	0.317147	-0.404157	0.0177588	0.0578996	0.744988	0.689876	6.37269e-06	0.0642946	0.717913	0.0586278	0.741889	-0.80984	6.59538e-09	0.731903	8.71129e-07	0.16474	0.351832	0.72683	1.12898e-06	0.168606	0.340484	-0.758403	2.03435e-07	-0.510732	0.00202593	0.116432	0.511983	-0.569981	0.000433234
ENSG00000278311	GGNBP2	79893	bisque4	0.314909	0.0696768	0.0839821	0.636774	-0.403046	0.0181046	0.501416	0.0025197	0.755853	2.35855e-07	-0.347034	0.0443434	-0.848691	2.29112e-10	-0.294695	0.090668	0.0250327	0.888244	0.959362	3.79835e-19	-0.773634	8.09138e-08	-0.203394	0.248611	-0.644807	3.84893e-05	-0.214313	0.223562	0.667541	1.61369e-05	0.579758	0.000326362	0.0493327	0.78173	0.513305	0.0019054
ENSG00000166557	TMED3	23423	bisque4	0.0706045	0.691524	0.125716	0.47867	0.355882	0.038858	0.268544	0.124622	-0.0312236	0.860847	0.0181604	0.918804	0.270937	0.12117	-0.619296	9.42027e-05	0.318681	0.0662202	-0.294705	0.0906561	0.52649	0.00138105	0.417527	0.0140141	0.823019	2.31283e-09	-0.0164656	0.92636	-0.735033	7.40241e-07	0.227534	0.195608	0.627564	7.10965e-05	-0.669985	1.46322e-05
ENSG00000168228	ZCCHC4	29063	bisque4	-0.0598134	0.736852	-0.167869	0.342629	-0.181705	0.303725	-0.384935	0.0245763	-0.0761373	0.668673	0.0510208	0.77445	-0.130398	0.462309	0.63136	6.23097e-05	-0.312263	0.0721861	0.0313811	0.860152	-0.332107	0.0549933	-0.278305	0.110992	-0.656603	2.47385e-05	0.30841	0.0759631	0.614351	0.000111049	-0.333684	0.0537804	-0.598052	0.000187409	0.424409	0.012361
ENSG00000174607	UGT8	7368	bisque4	0.208214	0.237332	0.0725773	0.683344	-0.176778	0.317246	0.152683	0.388656	0.325885	0.0599916	-0.372401	0.0300885	-0.521435	0.00156482	0.196855	0.264474	-0.0964575	0.587357	0.494051	0.00298118	-0.568486	0.000452049	-0.0562454	0.752043	-0.648281	3.38574e-05	0.00286054	0.98719	0.651989	2.94743e-05	0.0242853	0.891561	-0.368735	0.0318796	0.48258	0.00384597
ENSG00000205981	DNAJC19	131118	bisque4	-0.238608	0.174148	0.082283	0.643631	0.239471	0.172549	-0.614484	0.000110563	-0.583953	0.000288225	0.270494	0.121805	0.867406	3.19048e-11	0.316513	0.0681906	-0.498832	0.00267398	-0.705229	3.20479e-06	0.84171	4.47194e-10	0.131458	0.458646	0.386338	0.024015	0.0816269	0.646287	-0.699013	4.25478e-06	-0.655368	2.59333e-05	0.282689	0.105248	-0.26165	0.134972
ENSG00000074696	PTPLAD1	51495	bisque4	-0.179046	0.310975	0.120607	0.496861	0.37983	0.0267116	-0.400944	0.0187739	-0.551749	0.000718014	0.314637	0.0699317	0.770676	9.73136e-08	0.191108	0.27895	-0.156066	0.378105	-0.729872	9.67095e-07	0.721678	1.46059e-06	0.175694	0.32027	0.572852	0.000399025	0.0977348	0.582395	-0.712986	2.22731e-06	-0.506007	0.00226464	0.147743	0.404364	-0.372228	0.0301711
ENSG00000006453	BAIAP2L1	55971	bisque4	0.257093	0.142152	-0.14881	0.400942	-0.198497	0.26043	0.144986	0.413288	0.264662	0.130375	-0.231737	0.187256	-0.601119	0.000170205	0.362705	0.0350139	0.0316031	0.859173	0.492667	0.00307567	-0.760136	1.83804e-07	-0.200892	0.254605	-0.73203	8.65448e-07	-0.0615678	0.729418	0.829654	1.32032e-09	-0.0221228	0.901167	-0.666121	1.70738e-05	0.640276	4.5388e-05
ENSG00000277957	SENP3-EIF4A1	NA	bisque4	0.0173893	0.922241	-0.0324063	0.85563	-0.34783	0.043826	-0.0104752	0.953114	0.1892	0.283869	-0.0586486	0.741801	-0.452583	0.00719783	0.325735	0.0601164	-0.0520173	0.770162	0.394028	0.0211225	-0.590448	0.000236962	-0.182715	0.300999	-0.696549	4.75136e-06	0.0659716	0.710866	0.721498	1.47363e-06	0.0481122	0.787004	-0.524697	0.00144393	0.519911	0.00162426
ENSG00000155508	CNOT8	9337	bisque4	0.35865	0.0372594	0.119136	0.502164	0.48775	0.00343254	-0.111038	0.531854	-0.0776228	0.662587	-0.13797	0.436488	0.420711	0.0132275	0.0151028	0.932441	-0.239293	0.172878	-0.339889	0.0492133	0.506344	0.00224684	0.140289	0.428741	0.299541	0.0852421	-0.0428154	0.809999	-0.514566	0.00184868	-0.465157	0.00557195	0.293515	0.092028	-0.25536	0.144954
ENSG00000124224	PPP4R1L	NA	bisque4	0.0518795	0.770754	-0.205366	0.243954	-0.403276	0.0180325	-0.100217	0.572803	0.285672	0.10147	-0.0418819	0.814069	-0.526131	0.00139344	0.435672	0.0100106	-0.195288	0.268372	0.498427	0.00269887	-0.713361	2.18778e-06	-0.37644	0.0282118	-0.8687	2.75353e-11	-0.0472248	0.790845	0.872192	1.83647e-11	0.0228473	0.897947	-0.553103	0.000692266	0.682814	8.62288e-06
ENSG00000168303	MPLKIP	136647	bisque4	-0.419967	0.0134079	-0.0302406	0.865188	0.148562	0.401737	-0.529982	0.00126545	-0.638325	4.86894e-05	0.443374	0.00863153	0.901407	3.58819e-13	0.0386645	0.828131	-0.256343	0.14336	-0.746722	3.94755e-07	0.931283	1.38534e-15	0.24242	0.167165	0.675933	1.14874e-05	-0.024732	0.889578	-0.874023	1.47797e-11	-0.37224	0.0301655	0.448389	0.00782331	-0.48834	0.00338787
ENSG00000244945	RP11-1379J22.2	101928445	bisque4	0.0473896	0.790131	-0.133768	0.450717	-0.217946	0.215624	-0.0771985	0.664323	0.0805352	0.650715	-0.0367022	0.836734	-0.408396	0.0164906	0.370529	0.0309928	-0.0405258	0.819989	0.252649	0.149418	-0.546586	0.000824178	-0.372262	0.0301549	-0.609743	0.000129135	0.0943802	0.595468	0.721735	1.4565e-06	-0.0646369	0.716472	-0.593865	0.000213412	0.427761	0.0116171
ENSG00000144589	STK11IP	114790	bisque4	0.0194706	0.912968	-0.0431734	0.80844	-0.211599	0.229622	0.306449	0.0779442	0.254123	0.146979	-0.335704	0.052258	-0.675624	1.16343e-05	-0.0409107	0.818308	0.44318	0.00866418	0.313723	0.0707933	-0.657811	2.36175e-05	-0.104256	0.557356	-0.418314	0.013816	0.304309	0.0801516	0.795657	1.86827e-08	0.388369	0.023221	-0.529698	0.00127452	0.0355471	0.841806
ENSG00000068394	GPKOW	27238	bisque4	-0.341466	0.0481033	-0.0670237	0.706458	0.292566	0.0931334	-0.376161	0.0283383	-0.685875	7.57143e-06	0.508792	0.00212116	0.810946	6.05942e-09	0.0271102	0.879034	0.101911	0.566299	-0.859237	7.80905e-11	0.778489	5.94163e-08	0.188214	0.286432	0.804092	1.01599e-08	0.0889266	0.616988	-0.790103	2.74808e-08	-0.304569	0.0798804	0.170388	0.335331	-0.609306	0.000130979
ENSG00000204859	ZBTB48	3104	bisque4	0.047578	0.789316	-0.201753	0.252531	-0.0744081	0.675785	-0.00180878	0.9919	0.0461025	0.79571	-0.225529	0.199683	-0.441618	0.00893072	0.417316	0.0140674	0.201492	0.253159	0.0882302	0.619759	-0.56453	0.000505419	-0.216413	0.21895	-0.534737	0.0011217	0.31392	0.0706068	0.79291	2.26456e-08	-0.0888988	0.617098	-0.798753	1.49893e-08	0.223458	0.203952
ENSG00000197852	FAM212B	55924	bisque4	-0.145231	0.412491	0.0363683	0.838199	-0.430823	0.0109713	0.136692	0.44079	0.206621	0.241021	-0.29317	0.0924293	-0.547473	0.000805008	0.0611695	0.731104	0.058619	0.741927	0.461477	0.00601142	-0.550497	0.000742586	-0.0671731	0.705832	-0.57141	0.000415885	0.163683	0.354972	0.69799	4.45496e-06	0.289257	0.0970673	-0.348779	0.0432148	0.310493	0.0739025
ENSG00000134444	KIAA1468	57614	bisque4	0.0885458	0.618502	-0.0987848	0.578329	-0.304568	0.0798813	-0.102635	0.56353	0.22224	0.206494	-0.226194	0.198325	-0.505873	0.00227177	0.535689	0.00109472	-0.206769	0.240677	0.426366	0.0119219	-0.68112	9.26044e-06	-0.23322	0.18437	-0.900272	4.27334e-13	0.0644381	0.717309	0.906904	1.49225e-13	-0.126076	0.477401	-0.670862	1.41243e-05	0.657942	2.34993e-05
ENSG00000169057	MECP2	4204	bisque4	0.0461081	0.795685	-0.17852	0.312422	-0.424938	0.0122409	0.337098	0.0512277	0.324917	0.060801	-0.215573	0.220788	-0.769464	1.04872e-07	0.00379623	0.983	0.299382	0.0854167	0.610113	0.000127591	-0.852678	1.54021e-10	-0.267808	0.125697	-0.633902	5.69839e-05	0.0632265	0.722412	0.882738	5.00902e-12	0.417289	0.0140744	-0.517858	0.00170746	0.375473	0.028652
ENSG00000132646	PCNA	5111	bisque4	-0.37312	0.0297472	-0.0935402	0.598761	0.254016	0.147155	-0.625949	7.51608e-05	-0.731193	9.03633e-07	0.46314	0.00580925	0.931886	1.20824e-15	0.295812	0.0893945	-0.244581	0.163295	-0.871834	1.91524e-11	0.864983	4.1856e-11	0.194072	0.271421	0.59335	0.000216819	0.0303049	0.864903	-0.756057	2.33087e-07	-0.588402	0.000252158	0.15447	0.383061	-0.39003	0.022588
ENSG00000158062	UBXN11	91544	bisque4	0.0236558	0.894356	-0.156654	0.37629	-0.213038	0.226396	0.0469713	0.791943	0.195366	0.268177	-0.236074	0.178903	-0.564123	0.000511208	0.274615	0.116006	0.196811	0.264583	0.252097	0.15034	-0.65008	3.16621e-05	-0.196034	0.266512	-0.610158	0.000127403	0.283891	0.103714	0.867617	3.11491e-11	0.108374	0.541803	-0.670195	1.45091e-05	0.235513	0.179969
ENSG00000214046	SMIM7	79086	bisque4	0.154629	0.382567	-0.242842	0.166404	-0.199265	0.258551	-0.0700781	0.693712	0.0918782	0.6053	-0.255994	0.143923	-0.335009	0.0527779	0.271579	0.120257	-0.260811	0.136273	0.306601	0.0777898	-0.315846	0.0688051	0.191755	0.277295	-0.570904	0.000421957	-0.0435225	0.80692	0.542818	0.000910156	-0.174202	0.324462	-0.286215	0.100794	0.37698	0.0279683
ENSG00000175066	GK5	256356	bisque4	0.058903	0.740719	-0.0974453	0.583518	-0.455413	0.0068004	0.0923992	0.603247	0.386483	0.0239574	-0.284468	0.102983	-0.66982	1.47296e-05	0.228656	0.193353	-0.114936	0.517457	0.653226	2.813e-05	-0.760457	1.80368e-07	-0.187294	0.288837	-0.871077	2.09252e-11	0.0163548	0.926854	0.911309	7.09785e-14	0.178969	0.311187	-0.422838	0.0127229	0.602231	0.000164325
ENSG00000204165	CXorf65	158830	bisque4	-0.0408197	0.818706	-0.0109428	0.951023	-0.376088	0.0283714	0.146949	0.406926	0.303427	0.0810746	-0.117595	0.507748	-0.633327	5.81513e-05	0.0889061	0.617069	0.144392	0.415225	0.477031	0.00433698	-0.736731	6.76984e-07	-0.365512	0.0335251	-0.633529	5.7739e-05	0.202472	0.250808	0.83016	1.26385e-09	0.345031	0.045668	-0.450514	0.00750078	0.360342	0.0363085
ENSG00000076248	UNG	7374	bisque4	0.0376044	0.832776	0.209183	0.235108	0.561108	0.000556009	-0.345297	0.0454903	-0.505394	0.00229736	0.0523991	0.768521	0.70016	4.04027e-06	0.380469	0.0264359	-0.19931	0.258443	-0.722016	1.43636e-06	0.627656	7.08709e-05	0.0563619	0.751545	0.408507	0.0164583	0.221735	0.207553	-0.567927	0.000459276	-0.726499	1.14799e-06	-0.0959855	0.589196	-0.24516	0.16227
ENSG00000223891	OSER1-AS1	100505783	bisque4	-0.27456	0.116081	0.226261	0.198187	0.233599	0.183638	-0.408438	0.0164783	-0.430424	0.0110538	0.147479	0.405215	0.705955	3.09905e-06	0.0946313	0.594485	-0.278671	0.110504	-0.630016	6.53006e-05	0.795739	1.85759e-08	0.199165	0.258795	0.470374	0.00499644	0.200199	0.256281	-0.662526	1.96708e-05	-0.402471	0.0182855	0.328228	0.0580687	-0.417044	0.0141366
ENSG00000139597	N4BP2L1	90634	bisque4	-0.222913	0.205087	-0.0708541	0.690487	0.322596	0.0627755	-0.647133	3.53287e-05	-0.715941	1.93297e-06	0.344257	0.0461878	0.900792	3.94573e-13	0.485726	0.00358959	-0.384731	0.0246587	-0.828853	1.41454e-09	0.7995	1.42058e-08	0.137141	0.439276	0.406221	0.0171315	0.0569818	0.7489	-0.648131	3.40462e-05	-0.793753	2.1353e-08	0.00351752	0.984248	-0.24695	0.159127
ENSG00000238057	ZEB2-AS1	100303491	bisque4	0.064055	0.718921	-0.12778	0.47142	-0.46048	0.00613545	0.113405	0.523088	0.358686	0.0372388	-0.176332	0.318488	-0.697444	4.5653e-06	0.23922	0.173013	-0.0262079	0.883032	0.636758	5.14939e-05	-0.827192	1.63018e-09	-0.2675	0.126149	-0.84995	2.0237e-10	0.00984417	0.955935	0.936562	4.00601e-16	0.215115	0.221794	-0.505487	0.00229235	0.596128	0.000198984
ENSG00000183060	LYSMD4	145748	bisque4	0.131747	0.457649	0.036106	0.839351	-0.0480388	0.787322	-0.0177771	0.920513	0.228721	0.193223	-0.311274	0.0731408	-0.430522	0.0110335	0.313966	0.0705634	-0.00253861	0.988631	0.182601	0.301307	-0.489892	0.00327285	-0.114216	0.520104	-0.584198	0.000286125	0.319863	0.0651648	0.726308	1.15912e-06	-0.0357697	0.840828	-0.556556	0.000630226	0.241324	0.169151
ENSG00000182944	EWSR1	2130	bisque4	-0.126973	0.474247	-0.200837	0.254736	-0.524099	0.00146546	0.379767	0.0267388	0.283453	0.104271	-0.0675969	0.70406	-0.675272	1.18038e-05	-0.405509	0.0173458	0.423502	0.0125689	0.542793	0.000910768	-0.60354	0.000157631	0.00732468	0.967206	-0.275296	0.115067	0.0494215	0.781346	0.591332	0.000230661	0.707644	2.86521e-06	-0.0730008	0.681593	0.0184835	0.917365
ENSG00000139194	RBP5	83758	bisque4	0.0747369	0.67443	-0.240061	0.171462	-0.39637	0.0203013	0.242065	0.167806	0.325755	0.0600997	-0.233834	0.183184	-0.721433	1.4784e-06	0.117931	0.50653	0.16125	0.362267	0.591509	0.000229417	-0.805989	8.82369e-09	-0.0740417	0.677295	-0.687016	7.2102e-06	-0.00700863	0.96862	0.876395	1.1098e-11	0.298661	0.0862081	-0.500659	0.00256409	0.467923	0.00526012
ENSG00000175938	ORAI3	93129	bisque4	-0.386138	0.0240944	-0.214824	0.222433	0.257945	0.140789	-0.354808	0.0394927	-0.727173	1.10957e-06	0.393036	0.0214784	0.773276	8.27579e-08	0.0648617	0.715527	0.148148	0.403063	-0.856256	1.06777e-10	0.745212	4.2895e-07	0.183758	0.298202	0.75576	2.37123e-07	0.0986468	0.578863	-0.723055	1.36421e-06	-0.327854	0.0583725	0.079583	0.654587	-0.611509	0.000121911
ENSG00000269990	NA	NA	bisque4	0.0339534	0.848815	0.00574693	0.974267	0.327806	0.0584113	-0.169021	0.33928	-0.379867	0.0266953	0.0629907	0.723407	0.477092	0.00433123	0.0850012	0.632675	-0.0663085	0.709453	-0.479842	0.0040819	0.547222	0.000810383	0.228348	0.193971	0.443523	0.00860647	-0.0462288	0.795161	-0.529788	0.00127163	-0.407252	0.0168251	0.116895	0.510294	-0.34246	0.0474138
ENSG00000223525	RABGAP1L-IT1	NA	bisque4	0.0611225	0.731303	-0.0906102	0.610309	-0.282828	0.105069	0.0603072	0.734758	0.278468	0.110774	0.0582982	0.743292	-0.490931	0.0031978	0.20649	0.241326	-0.0724384	0.683919	0.488823	0.00335172	-0.61262	0.000117557	-0.258535	0.13985	-0.579145	0.000332298	-0.0143643	0.935737	0.632811	5.92169e-05	0.146757	0.407544	-0.390992	0.0222276	0.6073	0.000139752
ENSG00000232354	VIPR1-AS1	NA	bisque4	0.0419559	0.813747	0.129916	0.463977	-0.0529648	0.766091	-0.153064	0.38746	0.000462091	0.997931	-0.354675	0.0395719	-0.215386	0.221198	0.540781	0.000959861	-0.25732	0.141787	0.104399	0.556812	-0.31808	0.0667614	-0.292656	0.0930285	-0.615078	0.000108415	0.214058	0.224127	0.585729	0.000273305	-0.344324	0.0461424	-0.579483	0.000329017	0.393869	0.0211793
ENSG00000138085	ATRAID	51374	bisque4	-0.0659953	0.710767	0.245374	0.161892	0.232198	0.186356	0.0115064	0.948504	-0.0273713	0.877878	0.107432	0.545341	0.425071	0.012211	-0.534519	0.00112797	-0.0677798	0.703295	-0.276882	0.112906	0.684967	7.87039e-06	0.232147	0.186454	0.69023	6.27527e-06	0.00960331	0.957012	-0.797791	1.6058e-08	0.122924	0.488569	0.843104	3.92302e-10	-0.582427	0.000301611
ENSG00000185414	MRPL30	51263	bisque4	-0.202213	0.251429	0.0176228	0.9212	0.282114	0.105988	-0.509062	0.00210768	-0.545019	0.000859018	0.171023	0.333507	0.824937	1.97152e-09	0.259041	0.139048	-0.414141	0.0148932	-0.661934	2.01311e-05	0.818183	3.43046e-09	0.195386	0.268126	0.431931	0.0107451	0.0213381	0.904657	-0.715896	1.93723e-06	-0.615988	0.000105194	0.276873	0.112917	-0.304584	0.0798646
ENSG00000163655	GMPS	8833	bisque4	-0.0358967	0.84027	0.00731389	0.967254	0.436238	0.00990335	-0.135986	0.443176	-0.435479	0.0100475	0.118007	0.506253	0.689472	6.4854e-06	-0.111587	0.529815	-0.0279535	0.875301	-0.607612	0.000138356	0.764168	1.44672e-07	0.25863	0.139699	0.742014	5.10527e-07	-0.0137233	0.9386	-0.853117	1.47326e-10	-0.347541	0.0440129	0.390587	0.0223787	-0.516313	0.00177251
ENSG00000279873	LINC01126	100129726	bisque4	0.0225045	0.89947	-0.293588	0.0919441	-0.232611	0.185551	0.01204	0.946119	-0.0397933	0.823192	-0.157091	0.374942	-0.406467	0.017058	0.382633	0.025521	0.103087	0.561807	0.219198	0.212934	-0.545708	0.000843547	0.0890062	0.616671	-0.529856	0.00126947	-0.0126215	0.943521	0.688913	6.64414e-06	-0.0887078	0.617858	-0.671757	1.36225e-05	0.331253	0.0556587
ENSG00000137135	ARHGEF39	84904	bisque4	0.00883483	0.96045	-0.091081	0.608447	-0.223096	0.204704	-0.151503	0.392375	0.18674	0.290291	-0.00117411	0.994742	-0.347318	0.0441581	0.330777	0.0560333	-0.0783984	0.659417	0.198058	0.261507	-0.460415	0.0061436	-0.187429	0.288485	-0.58394	0.000288332	0.238957	0.173501	0.675131	1.18722e-05	-0.0119847	0.946366	-0.451874	0.00730039	0.31291	0.0715658
ENSG00000165457	FOLR2	2350	bisque4	-0.0307312	0.863021	0.460261	0.00616304	0.277342	0.112284	0.033736	0.849772	-0.108144	0.542666	0.00339663	0.984789	0.414861	0.0147023	-0.342767	0.0472029	-0.036467	0.837766	-0.320397	0.0646918	0.588275	0.000253128	0.0531645	0.765233	0.575621	0.000368327	0.137699	0.437399	-0.671857	1.35675e-05	-0.00550768	0.975338	0.574473	0.000380788	-0.498844	0.00267322
ENSG00000136861	CDK5RAP2	55755	bisque4	0.234511	0.181883	0.0233521	0.895705	-0.294556	0.0908279	0.22925	0.192167	0.446822	0.00806856	-0.133967	0.450037	-0.651492	3.00294e-05	0.249512	0.154709	-0.0247859	0.889339	0.682734	8.6522e-06	-0.837982	6.30878e-10	-0.394039	0.0211186	-0.766605	1.24889e-07	-0.191521	0.277893	0.782066	4.70911e-08	0.171528	0.332059	-0.484338	0.00370082	0.754044	2.6164e-07
ENSG00000148356	LRSAM1	90678	bisque4	-0.171998	0.330716	-0.399719	0.0191731	-0.369196	0.0316495	0.161458	0.361641	0.00560706	0.974893	0.0463802	0.794505	-0.507042	0.00221034	0.088296	0.619497	0.429689	0.011207	0.2646	0.130468	-0.616557	0.000103225	-0.15341	0.386376	-0.319461	0.0655223	-0.116328	0.512365	0.655072	2.62268e-05	0.329034	0.0574187	-0.588924	0.000248197	0.199703	0.257486
ENSG00000264269	RP11-15F12.1	NA	bisque4	0.250784	0.152547	-0.01391	0.937766	-0.175941	0.319581	0.289135	0.0972147	0.361717	0.0355509	-0.229898	0.19088	-0.576124	0.000362972	0.143132	0.419352	0.0757129	0.670416	0.566421	0.000479242	-0.681745	9.02032e-06	-0.10365	0.559661	-0.560631	0.000563398	-0.286498	0.100443	0.603846	0.000156106	0.157431	0.373896	-0.417781	0.0139497	0.591716	0.000227969
ENSG00000100918	REC8	9985	bisque4	-0.069575	0.695806	-0.227428	0.195822	-0.542022	0.000929315	0.112233	0.527422	0.289244	0.097083	0.0180191	0.919434	-0.69844	4.36579e-06	0.135959	0.443269	0.142964	0.419903	0.57262	0.000401694	-0.823833	2.1618e-09	-0.292384	0.0933468	-0.726653	1.1391e-06	0.0729385	0.68185	0.920127	1.41741e-14	0.3736	0.0295211	-0.520282	0.00160962	0.470666	0.00496581
ENSG00000272888	LINC01578	NA	bisque4	0.397205	0.0200148	0.172589	0.329033	-0.254325	0.146646	0.317293	0.0674759	0.763293	1.52444e-07	-0.402324	0.018332	-0.757676	2.1224e-07	-0.0572121	0.747918	-0.212094	0.228509	0.856861	1.00265e-10	-0.710466	2.50998e-06	-0.22453	0.201734	-0.772396	8.74435e-08	-0.116013	0.513515	0.711264	2.41708e-06	0.304142	0.080326	-0.0261982	0.883076	0.606093	0.000145286
ENSG00000172977	KAT5	10524	bisque4	-0.0458731	0.796704	-0.0502976	0.777566	-0.541935	0.000931417	0.427248	0.0117285	0.454427	0.00693667	-0.264775	0.130204	-0.774408	7.70654e-08	-0.349218	0.0429346	0.237875	0.175515	0.736402	6.88848e-07	-0.687342	7.10989e-06	-0.155806	0.37891	-0.492413	0.00309322	0.0316153	0.859119	0.68711	7.18103e-06	0.665243	1.76775e-05	-0.0373016	0.834104	0.201274	0.253684
ENSG00000106258	CYP3A5	1577	bisque4	0.235052	0.180847	0.0189442	0.915312	-0.0367562	0.836497	0.0350136	0.844151	0.145305	0.41225	-0.0740829	0.677125	-0.316376	0.068316	0.400441	0.0189369	-0.13285	0.453858	0.295512	0.0897351	-0.511898	0.00197051	-0.316334	0.0683551	-0.564961	0.000499342	-0.0212624	0.904993	0.532655	0.00118277	-0.165615	0.349244	-0.52486	0.00143812	0.627178	7.20481e-05
ENSG00000270344	RP11-734K2.4	NA	bisque4	-0.062346	0.726129	-0.191576	0.277754	-0.36675	0.0328851	-0.157609	0.373349	0.127294	0.473123	-0.0541289	0.761097	-0.347274	0.0441867	0.390151	0.0225422	-0.244127	0.164103	0.360659	0.0361326	-0.515518	0.00180683	-0.305096	0.0793343	-0.735558	7.20126e-07	0.13802	0.43632	0.688388	6.79649e-06	-0.0670577	0.706315	-0.431098	0.0109149	0.551983	0.000713513
ENSG00000185917	SETD4	54093	bisque4	0.0186948	0.916423	-0.18058	0.306782	-0.103285	0.561051	-0.348167	0.043608	-0.0592281	0.739338	-0.103921	0.558627	-0.193477	0.272923	0.671355	1.38459e-05	-0.244089	0.164171	0.0142351	0.936314	-0.363821	0.0344159	-0.225036	0.200693	-0.675822	1.154e-05	0.206394	0.241551	0.697747	4.50368e-06	-0.405947	0.0172136	-0.711928	2.34226e-06	0.419325	0.013565
ENSG00000147383	NSDHL	50814	bisque4	-0.289279	0.0970403	-0.0049109	0.97801	0.299831	0.0849262	-0.415506	0.0145334	-0.57796	0.000344043	0.355931	0.0388292	0.861135	6.37494e-11	0.0423999	0.81181	-0.1759	0.319693	-0.741749	5.17898e-07	0.869865	2.40875e-11	0.273179	0.118002	0.69965	4.13441e-06	-0.0739765	0.677564	-0.870135	2.33455e-11	-0.403403	0.0179929	0.374506	0.0290981	-0.450349	0.00752539
ENSG00000106692	FKTN	2218	bisque4	-0.0783044	0.659801	-0.153733	0.385364	-0.169847	0.336892	-0.4103	0.0159459	-0.159467	0.36767	0.0817755	0.645685	-0.0646763	0.716307	0.712072	2.32631e-06	-0.262067	0.134328	-0.0316962	0.858762	-0.32649	0.0594904	-0.283117	0.104699	-0.624653	7.85715e-05	0.0651281	0.714407	0.569115	0.000444047	-0.391659	0.021981	-0.701961	3.72306e-06	0.497691	0.00274468
ENSG00000113269	RNF130	55819	bisque4	0.0194188	0.913199	0.257494	0.141509	0.238515	0.17432	0.163495	0.355532	0.0769506	0.665338	0.0314803	0.859714	0.328606	0.0577634	-0.654317	2.69906e-05	0.0417906	0.814467	-0.165096	0.350776	0.60395	0.000155591	0.28433	0.103157	0.718027	1.74709e-06	-0.111098	0.531632	-0.791393	2.51514e-08	0.239092	0.173251	0.874483	1.39868e-11	-0.565576	0.000490785
ENSG00000155016	CYP2U1	113612	bisque4	-0.315761	0.0688846	-0.085099	0.632282	0.157855	0.372595	-0.479008	0.00415615	-0.619752	9.27703e-05	0.434169	0.0103005	0.781826	4.78379e-08	0.278029	0.11136	-0.24364	0.164972	-0.656923	2.4437e-05	0.705728	3.13179e-06	0.0638789	0.719663	0.462411	0.00589712	-0.0871822	0.623939	-0.662871	1.94065e-05	-0.491213	0.00317768	0.123087	0.487987	-0.231594	0.187535
ENSG00000111834	RSPH4A	345895	bisque4	0.403368	0.0180039	0.0334656	0.850963	-0.0535967	0.763379	0.20499	0.244838	0.603952	0.000155578	-0.342944	0.0470811	-0.668716	1.53969e-05	0.214092	0.224053	-0.0814395	0.647046	0.585557	0.000274717	-0.748792	3.51913e-07	-0.266913	0.127015	-0.748298	3.61728e-07	0.0367614	0.836474	0.791992	2.41335e-08	0.0906756	0.610051	-0.409418	0.0161964	0.603908	0.000155797
ENSG00000122705	CLTA	1211	bisque4	-0.376619	0.0281308	0.0308725	0.862397	0.231077	0.18855	-0.294415	0.0909896	-0.560494	0.000565535	0.327786	0.058428	0.775112	7.3716e-08	-0.216449	0.21887	0.00330187	0.985214	-0.736833	6.73353e-07	0.900497	4.12882e-13	0.271297	0.120657	0.852395	1.58495e-10	0.0720071	0.685705	-0.893846	1.10667e-12	-0.157596	0.373388	0.506704	0.00222793	-0.719082	1.65949e-06
ENSG00000170632	ARMC10	83787	bisque4	-0.354218	0.0398452	0.00420626	0.981164	0.199233	0.25863	-0.536506	0.00107204	-0.608991	0.000132323	0.384725	0.0246614	0.886288	3.14471e-12	0.234664	0.18159	-0.351585	0.0414489	-0.702586	3.61837e-06	0.824919	1.9745e-09	0.0795193	0.654847	0.517226	0.00173384	-0.0227334	0.898453	-0.774875	7.48274e-08	-0.504844	0.00232703	0.288491	0.0979952	-0.284051	0.10351
ENSG00000158863	FAM160B2	64760	bisque4	-0.0231852	0.896446	-0.327796	0.0584199	-0.186926	0.289804	0.122178	0.491232	0.0350318	0.844071	-0.216961	0.217756	-0.514789	0.00183882	0.258297	0.140228	0.378754	0.0271804	0.158247	0.371394	-0.617629	9.96046e-05	-0.0801939	0.652102	-0.447237	0.00800305	0.156182	0.377745	0.779061	5.72624e-08	0.107194	0.546237	-0.763103	1.5418e-07	0.156138	0.377883
ENSG00000167992	VWCE	220001	bisque4	0.0960051	0.589119	-0.141323	0.425312	-0.395067	0.0207546	0.222261	0.206449	0.331682	0.055324	-0.109759	0.536621	-0.58028	0.000321391	-0.0852114	0.631831	0.0711792	0.689137	0.558502	0.000597492	-0.56992	0.000433977	0.0220522	0.901481	-0.505583	0.00228722	-0.0198908	0.911097	0.608594	0.000134035	0.323947	0.0616194	-0.160598	0.364237	0.302178	0.0823963
ENSG00000103472	RRN3P2	NA	bisque4	0.179321	0.310221	0.0196813	0.91203	-0.387256	0.0236534	0.331254	0.0556585	0.54663	0.000823216	-0.300087	0.0846472	-0.73871	6.09568e-07	0.00951696	0.957399	-0.0440567	0.804596	0.80428	1.002e-08	-0.774952	7.44651e-08	-0.296144	0.0890182	-0.72487	1.24604e-06	-0.153184	0.387083	0.735755	7.127e-07	0.343183	0.0469175	-0.200907	0.254567	0.638676	4.80794e-05
ENSG00000078804	TP53INP2	58476	bisque4	-0.135488	0.444864	-0.12465	0.482435	-0.682652	8.68228e-06	0.447358	0.0079839	0.421614	0.0130112	-0.130092	0.463368	-0.763721	1.48594e-07	-0.410604	0.0158606	0.243871	0.16456	0.820649	2.80983e-09	-0.687207	7.15126e-06	-0.082647	0.642159	-0.447802	0.00791435	-0.158443	0.370794	0.614896	0.000109068	0.777377	6.38159e-08	0.0370192	0.835343	0.278564	0.110646
ENSG00000279207	RP11-159D12.8	NA	bisque4	0.0986646	0.578794	-0.144569	0.414647	-0.208922	0.235705	-0.106009	0.550709	0.187535	0.288207	-0.231258	0.188195	-0.4552	0.00682955	0.508734	0.00212406	-0.147478	0.405219	0.314295	0.0702532	-0.607497	0.000138868	-0.167362	0.344112	-0.787873	3.19852e-08	0.187795	0.287527	0.834415	8.69871e-10	-0.136232	0.442345	-0.657074	2.42962e-05	0.546453	0.000827075
ENSG00000240731	RP5-890O3.9	NA	bisque4	0.119367	0.501329	-0.215116	0.221791	-0.266663	0.127384	-0.0276305	0.87673	0.165532	0.349488	-0.165791	0.348726	-0.520099	0.00161681	0.459535	0.00625511	-0.0436583	0.806329	0.374703	0.0290067	-0.674193	1.23373e-05	-0.277083	0.112633	-0.765874	1.30545e-07	0.0170852	0.923597	0.861376	6.21165e-11	-0.0885145	0.618627	-0.695931	4.88389e-06	0.542652	0.000914119
ENSG00000159055	MIS18A	54069	bisque4	0.0107262	0.951992	0.179098	0.310832	0.538093	0.00102912	-0.350908	0.0418697	-0.448631	0.00778595	0.166017	0.348058	0.698267	4.39985e-06	0.286813	0.100053	-0.156942	0.3754	-0.733471	8.03126e-07	0.665503	1.74967e-05	0.0550679	0.757076	0.492875	0.00306128	0.078669	0.658313	-0.627038	7.23984e-05	-0.619165	9.46176e-05	0.0155472	0.930457	-0.304595	0.0798535
ENSG00000092964	DPYSL2	1808	bisque4	-0.400595	0.0188868	-0.177456	0.315362	0.245958	0.160864	-0.582165	0.00030396	-0.77985	5.44121e-08	0.498147	0.00271624	0.903688	2.50932e-13	0.301506	0.0831147	-0.160338	0.365025	-0.87458	1.3825e-11	0.81098	6.04356e-09	0.231819	0.187096	0.619884	9.2359e-05	0.00781983	0.96499	-0.728675	1.02807e-06	-0.549634	0.000759952	0.0616469	0.729084	-0.376632	0.0281251
ENSG00000162231	NXF1	10482	bisque4	0.0400508	0.822066	-0.43831	0.00951863	-0.489308	0.00331573	0.281007	0.107424	0.25488	0.145737	-0.0409271	0.818237	-0.664603	1.81301e-05	0.0719834	0.685803	0.260512	0.136739	0.617855	9.88574e-05	-0.809497	6.77028e-09	-0.140932	0.426607	-0.573563	0.00039093	-0.275329	0.115023	0.753207	2.7444e-07	0.362504	0.0351225	-0.473989	0.00462835	0.486996	0.00349033
ENSG00000272849	RP11-347I19.8	NA	bisque4	-0.0499553	0.779043	-0.0278978	0.875547	-0.0479067	0.787893	-0.0480256	0.787379	0.0462007	0.795283	-0.161957	0.360139	-0.293135	0.0924703	0.257044	0.142229	0.194284	0.270889	-0.0151134	0.932393	-0.375908	0.0284533	-0.244492	0.163454	-0.365374	0.0335969	0.405143	0.017457	0.593436	0.00021625	-0.0130323	0.941686	-0.561546	0.000549289	0.0456203	0.797802
ENSG00000133313	CNDP2	55748	bisque4	-0.388623	0.0231232	-0.16158	0.361273	0.0840117	0.636654	-0.390593	0.0223767	-0.612865	0.000116616	0.557279	0.000617891	0.748924	3.49333e-07	-0.0247425	0.889531	-0.011631	0.947947	-0.656387	2.49441e-05	0.721202	1.49536e-06	0.24644	0.160018	0.689211	6.55888e-06	-0.0962768	0.588061	-0.758673	2.00259e-07	-0.220708	0.209719	0.307021	0.077362	-0.444856	0.00838557
ENSG00000163354	DCST2	127579	bisque4	-0.00169956	0.992389	-0.0988509	0.578074	-0.275793	0.114387	0.0899479	0.612933	0.152211	0.390141	-0.27207	0.119561	-0.54815	0.000790641	0.272663	0.118726	0.170164	0.335975	0.311693	0.0727348	-0.63425	5.62886e-05	-0.281974	0.106168	-0.617353	0.000100527	0.112352	0.526981	0.825704	1.84858e-09	0.0841694	0.63602	-0.653661	2.76711e-05	0.283331	0.104426
ENSG00000111644	ACRBP	84519	bisque4	-0.104572	0.556152	0.0840371	0.636552	0.267624	0.125968	0.0947772	0.593914	-0.215414	0.221135	0.182038	0.302825	0.443418	0.00862411	-0.42915	0.0113203	0.196929	0.264291	-0.37711	0.0279098	0.593932	0.000212971	0.527425	0.00134921	0.796057	1.81633e-08	-0.0485123	0.785274	-0.798678	1.507e-08	0.098116	0.580917	0.545423	0.000849911	-0.563433	0.000521163
ENSG00000240710	RP11-430C7.4	NA	bisque4	0.0339795	0.848701	-0.143377	0.418546	-0.272616	0.118792	-0.0166981	0.925323	0.163829	0.354539	-0.11286	0.5251	-0.434055	0.0103227	0.343165	0.0469296	-0.0871291	0.624151	0.37341	0.0296103	-0.585601	0.000274358	-0.120591	0.496918	-0.679078	1.00855e-05	0.0892694	0.615625	0.713708	2.15188e-06	-0.0275931	0.876896	-0.528728	0.00130595	0.514501	0.00185158
ENSG00000188396	TCTEX1D4	343521	bisque4	0.0611384	0.731236	-0.201523	0.253083	-0.433109	0.0105091	0.27235	0.119166	0.357721	0.0377899	-0.285629	0.101524	-0.673021	1.29411e-05	-0.0331587	0.852315	0.026229	0.882939	0.658718	2.28069e-05	-0.66469	1.80676e-05	-0.0144966	0.935147	-0.613884	0.000112774	-0.190803	0.279733	0.714458	2.07593e-06	0.353073	0.0405363	-0.222682	0.205569	0.471188	0.0049114
ENSG00000095066	HOOK2	29911	bisque4	0.0168369	0.924705	-0.200146	0.25641	-0.204038	0.247084	-0.163318	0.356062	0.0717835	0.686631	-0.190969	0.279308	-0.387359	0.0236129	0.548184	0.000789936	-0.0965093	0.587156	0.211599	0.229622	-0.550386	0.00074479	-0.156675	0.376224	-0.716183	1.91059e-06	0.0996851	0.574854	0.79381	2.12693e-08	-0.191085	0.279012	-0.70549	3.16647e-06	0.459032	0.00631954
ENSG00000228363	AC015971.2	NA	bisque4	0.162034	0.359906	-0.190961	0.279328	-0.300053	0.0846839	0.114428	0.519322	0.344735	0.0458662	-0.237135	0.176901	-0.655142	2.61575e-05	0.32664	0.0593667	-0.0114202	0.948889	0.541745	0.000936066	-0.799092	1.46286e-08	-0.213667	0.224994	-0.814417	4.6267e-09	-0.0257211	0.885191	0.918965	1.77071e-14	0.0911039	0.608357	-0.608498	0.000134452	0.590774	0.00023462
ENSG00000117408	IPO13	9670	bisque4	-0.246046	0.160709	-0.101796	0.566743	0.409325	0.016223	-0.467863	0.00526671	-0.720786	1.52632e-06	0.382841	0.0254343	0.797347	1.6574e-08	0.329842	0.0567728	0.0204617	0.908556	-0.924316	6.17298e-15	0.697135	4.62867e-06	0.212882	0.226744	0.621606	8.71494e-05	0.126009	0.477638	-0.614357	0.000111026	-0.571478	0.000415083	-0.123467	0.486637	-0.454128	0.00697848
ENSG00000139668	WDFY2	115825	bisque4	0.00742545	0.966755	-0.10881	0.54017	-0.281967	0.106178	-0.129535	0.465302	0.076015	0.669176	-0.234979	0.180987	-0.417713	0.013967	0.545859	0.000840174	-0.215832	0.22022	0.334268	0.0533365	-0.566693	0.00047559	-0.248068	0.157189	-0.804536	9.83193e-09	0.0351643	0.843489	0.822863	2.34281e-09	-0.195414	0.268056	-0.683711	8.30166e-06	0.615349	0.000107446
ENSG00000176396	EID2	163126	bisque4	0.0497102	0.7801	0.278173	0.111168	0.482773	0.00382983	-0.0435466	0.806816	-0.0892219	0.615814	0.166941	0.345342	0.55085	0.000735573	-0.36569	0.0334327	0.0543825	0.76001	-0.517577	0.00171916	0.707575	2.87443e-06	0.156894	0.375548	0.768323	1.1248e-07	0.138251	0.435546	-0.834347	8.75227e-10	-0.0474621	0.789817	0.596687	0.000195554	-0.621413	8.77183e-05
ENSG00000268230	CTD-2619J13.8	NA	bisque4	-0.0163398	0.926922	-0.00875861	0.96079	-0.206947	0.240264	0.117523	0.508012	0.0210222	0.906062	-0.138791	0.433738	-0.389371	0.0228372	0.24954	0.15466	0.224831	0.201115	0.219636	0.211999	-0.520885	0.00158603	-0.138171	0.435813	-0.40833	0.0165096	0.0750911	0.672973	0.604368	0.000153531	0.0726595	0.683004	-0.583173	0.000295	0.25956	0.13823
ENSG00000104960	PTOV1	53635	bisque4	0.00991733	0.955608	-0.181705	0.303725	-0.231237	0.188237	0.224067	0.20269	0.164858	0.351481	-0.299797	0.0849625	-0.650173	3.15523e-05	0.0999362	0.573886	0.392011	0.0218517	0.289492	0.0967835	-0.683269	8.45872e-06	-0.137776	0.437139	-0.490408	0.00323542	0.280254	0.10841	0.847699	2.5246e-10	0.256754	0.142696	-0.653537	2.78004e-05	0.10617	0.550101
ENSG00000164332	UBLCP1	134510	bisque4	-0.1745	0.323622	-0.0384526	0.829059	-0.0508163	0.775331	-0.524315	0.00145765	-0.357004	0.0382033	0.398768	0.019488	0.647023	3.5473e-05	0.198224	0.261098	-0.640927	4.43329e-05	-0.27249	0.118969	0.591797	0.000227404	0.120457	0.4974	0.132606	0.454696	-0.137185	0.439129	-0.553294	0.000688697	-0.424997	0.0122275	0.433305	0.0104702	0.0643464	0.717695
ENSG00000185619	PCGF3	10336	bisque4	0.0473754	0.790193	-0.0952716	0.591982	-0.324622	0.0610487	0.0526912	0.767266	0.286557	0.100369	-0.297629	0.0873524	-0.635736	5.34017e-05	0.309556	0.0748244	0.00480767	0.978472	0.454952	0.00686383	-0.729948	9.63353e-07	-0.248838	0.155863	-0.800408	1.33039e-08	0.145665	0.41108	0.940486	1.48403e-16	0.101194	0.569051	-0.611186	0.000123207	0.456779	0.00661528
ENSG00000136045	PWP1	11137	bisque4	0.228605	0.193456	0.208316	0.237097	0.500014	0.00260239	-0.24126	0.169269	-0.200381	0.25584	0.125834	0.478254	0.575235	0.000372477	0.113071	0.524324	-0.309302	0.0750751	-0.461904	0.00595889	0.579053	0.000333205	-0.0401707	0.821541	0.387173	0.0236859	0.0160912	0.928031	-0.619312	9.41512e-05	-0.503513	0.00240023	0.288608	0.0978531	-0.21067	0.231721
ENSG00000136826	KLF4	9314	bisque4	-0.131974	0.45687	-0.285342	0.101883	-0.536812	0.00106363	0.206004	0.24246	0.159108	0.368763	0.0873642	0.623212	-0.502322	0.00246749	-0.0101348	0.954635	0.113412	0.523065	0.576418	0.000359889	-0.622364	8.49405e-05	-0.0021449	0.990394	-0.43264	0.0106025	-0.279585	0.10929	0.526018	0.00139737	0.387418	0.0235901	-0.211698	0.229399	0.48385	0.00374058
ENSG00000197774	EME2	197342	bisque4	0.13674	0.440628	-0.264333	0.130871	-0.174723	0.322995	0.226991	0.196706	0.279485	0.109422	-0.364819	0.0338876	-0.683401	8.41166e-06	0.148229	0.402804	0.298763	0.0860956	0.368637	0.0319286	-0.723459	1.33708e-06	-0.014642	0.934498	-0.565967	0.000485421	0.152697	0.388611	0.872538	1.76301e-11	0.186658	0.290508	-0.623337	8.2178e-05	0.235562	0.179876
ENSG00000143543	JTB	10899	bisque4	0.00672779	0.969877	0.202921	0.249736	0.317225	0.0675381	0.173306	0.326996	-0.0162988	0.927104	-0.000607272	0.99728	0.360083	0.0364529	-0.660611	2.11952e-05	0.186812	0.290103	-0.318711	0.066193	0.659705	2.19536e-05	0.391965	0.0218683	0.829147	1.3793e-09	0.0198759	0.911163	-0.816333	3.97696e-09	0.224352	0.202101	0.796753	1.72893e-08	-0.737598	6.46665e-07
ENSG00000155111	CDK19	23097	bisque4	-0.354072	0.0399332	-0.0187993	0.915958	0.0399161	0.822654	-0.561144	0.000555446	-0.561304	0.000552997	0.343708	0.04656	0.765586	1.32835e-07	0.416521	0.0142706	-0.490178	0.00325204	-0.472591	0.00476781	0.618246	9.75755e-05	0.0455097	0.798282	0.223753	0.20334	-0.204005	0.247162	-0.563605	0.000518674	-0.560454	0.000566175	0.127287	0.473145	0.0921157	0.604364
ENSG00000065029	ZNF76	7629	bisque4	-0.144998	0.413249	-0.0694697	0.696244	-0.133003	0.453336	-0.116706	0.510985	-0.109693	0.536867	-0.186858	0.289982	-0.271375	0.120547	0.332676	0.0545535	0.145473	0.411704	-0.0633959	0.721698	-0.298617	0.0862572	-0.0787049	0.658166	-0.362922	0.0348969	0.321634	0.063608	0.598638	0.000184007	-0.0897098	0.613877	-0.607718	0.000137885	0.0117582	0.947378
ENSG00000075826	SEC31B	25956	bisque4	0.0805558	0.650632	-0.178065	0.313679	-0.225887	0.198951	0.0146488	0.934467	0.213611	0.225118	-0.223984	0.202861	-0.570924	0.000421712	0.377866	0.0275722	0.0919665	0.604952	0.318282	0.0665793	-0.700297	4.01515e-06	-0.260531	0.136709	-0.719892	1.5949e-06	0.187812	0.287481	0.912738	5.53105e-14	0.0216536	0.903253	-0.719164	1.65279e-06	0.388303	0.0232463
ENSG00000259758	NA	NA	bisque4	0.440008	0.00921283	0.122711	0.489328	0.029585	0.868084	0.283119	0.104697	0.477649	0.00427972	-0.451734	0.00732085	-0.590513	0.000236496	0.218005	0.215497	-0.00809646	0.963753	0.520463	0.00160249	-0.686249	7.45126e-06	-0.295756	0.0894578	-0.646981	3.55283e-05	-0.134182	0.449305	0.693479	5.44368e-06	0.00911887	0.959179	-0.473701	0.00465682	0.597622	0.000189944
ENSG00000102125	TAZ	6901	bisque4	0.0596338	0.737614	-0.133885	0.450318	-0.166906	0.345446	0.0453184	0.799112	0.138948	0.433211	-0.215858	0.220162	-0.518478	0.00168198	0.307008	0.0773753	0.204411	0.246204	0.200973	0.254408	-0.614785	0.00010947	-0.192327	0.275838	-0.564997	0.000498843	0.237703	0.175837	0.815904	4.11456e-09	0.0364095	0.838018	-0.690251	6.26973e-06	0.206031	0.242396
ENSG00000272669	RP3-508I15.21	NA	bisque4	-0.0773603	0.663661	-0.210841	0.231334	-0.427698	0.0116309	-0.0832148	0.639867	0.1619	0.360308	0.157896	0.37247	-0.474124	0.00461507	0.346903	0.0444289	0.0112947	0.94945	0.397291	0.0199856	-0.696375	4.78845e-06	-0.407202	0.0168399	-0.683989	8.20447e-06	-0.0276937	0.87645	0.798969	1.4759e-08	0.13699	0.439784	-0.590154	0.000239098	0.551991	0.000713351
ENSG00000130244	FAM98C	147965	bisque4	-0.079234	0.656009	-0.0980491	0.581177	0.0683498	0.700914	-0.105974	0.55084	-0.120077	0.498768	-0.134654	0.447698	-0.125328	0.480038	0.0989881	0.577544	0.20996	0.233333	-0.262411	0.133799	-0.0348859	0.844713	0.0452788	0.799284	-0.0558699	0.753647	0.50505	0.00231588	0.304548	0.079902	-0.0545444	0.759317	-0.352876	0.0406566	-0.330354	0.0563665
ENSG00000204584	RP11-304F15.3	NA	bisque4	0.197927	0.261828	0.0537051	0.762914	0.0530938	0.765537	0.042164	0.812839	0.210056	0.233115	-0.172194	0.330157	-0.402132	0.0183929	0.31644	0.0682571	0.0993567	0.57612	0.155609	0.379521	-0.518511	0.0016806	-0.233057	0.184686	-0.473106	0.00471603	0.148382	0.402313	0.652334	2.90933e-05	-0.0666166	0.708162	-0.602923	0.000160757	0.303336	0.0811708
ENSG00000185928	NA	NA	bisque4	0.0486401	0.784722	0.177076	0.316418	0.54937	0.000765334	-0.201176	0.253918	-0.423785	0.0125036	0.20083	0.254754	0.66423	1.83986e-05	0.0665787	0.708321	0.0701283	0.693503	-0.72339	1.34166e-06	0.623435	8.19043e-05	0.198682	0.259977	0.670997	1.40478e-05	0.121497	0.493666	-0.697307	4.59321e-06	-0.403398	0.0179944	0.108388	0.541751	-0.457264	0.00655065
ENSG00000082701	GSK3B	2932	bisque4	0.230809	0.189077	-0.0931717	0.600208	0.406879	0.0169355	0.169723	0.337248	-0.0180963	0.91909	0.0479138	0.787862	0.32438	0.0612529	-0.241164	0.169443	0.113995	0.520915	-0.201149	0.253984	0.347566	0.0439967	0.204244	0.246596	0.554913	0.000659102	-0.294349	0.0910649	-0.632341	6.02022e-05	-0.0646588	0.71638	0.377179	0.0278789	-0.197205	0.263609
ENSG00000056558	TRAF1	7185	bisque4	0.0573383	0.74738	-0.0533596	0.764396	-0.281058	0.107358	0.141713	0.424024	0.26495	0.129941	-0.308948	0.0754265	-0.633388	5.80263e-05	0.192405	0.275639	0.149218	0.399637	0.396867	0.0201302	-0.690474	6.20904e-06	-0.293843	0.0916487	-0.660045	2.16661e-05	0.17631	0.318549	0.87042	2.2587e-11	0.19044	0.280667	-0.580236	0.0003218	0.290285	0.0958319
ENSG00000064607	SUGP2	10147	bisque4	0.0825341	0.642616	-0.203484	0.248398	-0.268908	0.124092	-0.0319618	0.85759	0.216696	0.218334	-0.208805	0.235974	-0.560499	0.000565469	0.441089	0.00902273	0.00339801	0.984783	0.359477	0.0367922	-0.713649	2.15789e-06	-0.280182	0.108505	-0.792544	2.32278e-08	0.121041	0.495303	0.930439	1.67368e-15	-0.0262105	0.883021	-0.719108	1.65736e-06	0.485357	0.00361882
ENSG00000110719	TCIRG1	10312	bisque4	-0.070943	0.690118	-0.359087	0.0370118	-0.242094	0.167753	0.229449	0.19177	0.0913943	0.60721	0.00475724	0.978698	-0.538523	0.00101776	-0.00210237	0.990585	0.572387	0.000404392	0.186422	0.29113	-0.62154	8.7345e-05	-0.0740939	0.67708	-0.24355	0.165133	0.140025	0.42962	0.660279	2.14704e-05	0.387486	0.0235634	-0.579619	0.0003277	0.0160261	0.928321
ENSG00000090924	PLEKHG2	64857	bisque4	-0.110821	0.53266	-0.0953892	0.591522	-0.608354	0.000135081	0.301196	0.0834478	0.401617	0.0185573	-0.0947733	0.593929	-0.752731	2.81965e-07	-0.177174	0.316145	0.155117	0.381046	0.730957	9.14696e-07	-0.759547	1.90278e-07	-0.207057	0.240007	-0.591893	0.000226732	0.000785325	0.996483	0.770424	9.88386e-08	0.618148	9.78928e-05	-0.170283	0.335633	0.376016	0.0284041
ENSG00000169084	DHRSX	207063	bisque4	-0.048065	0.787208	0.158404	0.370914	0.181218	0.305045	0.0774828	0.66316	-0.00889996	0.960158	0.175787	0.32001	0.343024	0.0470267	-0.481002	0.00398044	0.0511695	0.77381	-0.210573	0.23194	0.495119	0.00291001	0.10797	0.543318	0.637046	5.09676e-05	-0.082082	0.644444	-0.688409	6.79056e-06	0.201882	0.252223	0.676679	1.114e-05	-0.447588	0.00794785
ENSG00000099840	IZUMO4	113177	bisque4	-0.0618618	0.728175	-0.137676	0.437474	-0.255973	0.143958	-0.0128509	0.942496	0.0748172	0.6741	-0.0825843	0.642413	-0.42516	0.0121908	0.234044	0.18278	0.220549	0.210057	0.148185	0.402944	-0.504571	0.00234186	-0.151401	0.392698	-0.473951	0.00463207	0.242081	0.167778	0.696312	4.80183e-06	0.102017	0.565897	-0.584002	0.000287797	0.111459	0.530291
ENSG00000230638	RP11-486B10.4	NA	bisque4	0.261963	0.134489	0.108182	0.542523	-0.15814	0.371722	0.326368	0.0595911	0.353201	0.040459	-0.0923263	0.603534	-0.546304	0.000830361	-0.0605555	0.733705	0.109777	0.536553	0.516396	0.00176899	-0.60915	0.000131642	-0.264197	0.131077	-0.417247	0.0140851	-0.0350282	0.844087	0.508088	0.00215662	0.282751	0.105168	-0.225415	0.199916	0.429895	0.0111638
ENSG00000168906	MAT2A	4144	bisque4	-0.0294818	0.868541	0.00142901	0.9936	-0.195598	0.267598	0.0268539	0.88017	0.181959	0.303039	-0.126393	0.476286	-0.357127	0.0381323	0.136346	0.441958	0.15103	0.393874	0.209505	0.234371	-0.458007	0.00645261	-0.363274	0.0347077	-0.407008	0.0168972	0.0504262	0.777012	0.551969	0.000713775	0.146996	0.406771	-0.391936	0.0218792	0.148092	0.403246
ENSG00000108963	DPH1	1801	bisque4	0.251578	0.15121	0.118169	0.505666	-0.0418089	0.814388	0.570458	0.000427376	0.433896	0.0103538	-0.499331	0.00264353	-0.82011	2.93592e-09	-0.167028	0.345089	0.545828	0.000840867	0.452587	0.00719717	-0.761323	1.71382e-07	-0.0866684	0.625992	-0.373652	0.0294968	0.264613	0.130448	0.763404	1.51435e-07	0.447924	0.00789546	-0.498743	0.00267946	0.0766024	0.666765
ENSG00000234585	CCT6P3	643180	bisque4	0.136833	0.440316	-0.298063	0.0868703	-0.159556	0.367397	-0.18636	0.291291	0.157221	0.37454	-0.113824	0.521545	-0.335488	0.0524192	0.596385	0.000197399	-0.199245	0.258601	0.257968	0.140751	-0.567156	0.000469411	-0.386699	0.0238721	-0.76147	1.69898e-07	-0.0390579	0.826409	0.738946	6.0193e-07	-0.251876	0.15071	-0.650288	3.14172e-05	0.589817	0.000241561
ENSG00000169740	ZNF32	7580	bisque4	-0.0934257	0.599211	0.376792	0.0280525	0.370681	0.0309184	-0.303485	0.0810143	-0.222333	0.206297	0.110014	0.53567	0.675395	1.17443e-05	-0.0914985	0.606798	-0.33489	0.0528671	-0.532592	0.00118466	0.828625	1.44247e-09	0.179478	0.309791	0.550737	0.000737821	0.150414	0.395826	-0.801276	1.24917e-08	-0.314041	0.0704928	0.580747	0.000316992	-0.427433	0.0116882
ENSG00000150712	MTMR12	54545	bisque4	-0.141602	0.424391	0.307535	0.0768428	0.346907	0.0444268	-0.191023	0.279169	-0.358437	0.0373802	0.201354	0.253489	0.70156	3.79171e-06	-0.12981	0.464346	-0.100895	0.570198	-0.560526	0.00056505	0.737703	6.43069e-07	0.0862729	0.627575	0.675547	1.16716e-05	-0.0111042	0.950301	-0.837963	6.31982e-10	-0.232244	0.186265	0.444866	0.00838389	-0.439143	0.00936758
ENSG00000181817	LSM10	84967	bisque4	-0.0618629	0.72817	0.189186	0.283905	0.444205	0.00849287	-0.0536454	0.76317	-0.28147	0.106821	0.172926	0.328072	0.618155	9.78713e-05	-0.37554	0.0286215	0.104442	0.556649	-0.605585	0.000147673	0.79714	1.68196e-08	0.358385	0.0374098	0.896018	8.07948e-13	0.052367	0.768659	-0.913436	4.88869e-14	-0.0749175	0.673687	0.599164	0.000181	-0.706648	3.00105e-06
ENSG00000276317	RP11-93B14.10	NA	bisque4	-0.250134	0.153648	-0.168314	0.341335	0.250911	0.152333	-0.383556	0.0251386	-0.539719	0.000986719	0.313158	0.0713297	0.678587	1.02936e-05	0.193329	0.273298	-0.0180025	0.919508	-0.684827	7.91729e-06	0.613369	0.000114699	0.090447	0.610956	0.535238	0.00110744	-0.14116	0.425854	-0.589021	0.000247473	-0.383311	0.0252397	0.0378553	0.831676	-0.341042	0.0483996
ENSG00000131067	GGT7	2686	bisque4	0.279303	0.109663	0.174265	0.324285	0.127291	0.473131	0.234398	0.182101	0.392747	0.021583	-0.307053	0.0773298	-0.551127	0.000730124	0.0571245	0.748291	0.333421	0.0539813	0.170196	0.335882	-0.555696	0.000645199	-0.177833	0.314319	-0.35487	0.039456	0.46477	0.00561682	0.655264	2.60363e-05	0.183716	0.298313	-0.49123	0.00317641	0.0318625	0.858028
ENSG00000204922	UQCC3	790955	bisque4	-0.0189774	0.915164	0.108406	0.541683	0.454501	0.00692638	-0.226515	0.197672	-0.330132	0.0565429	0.154526	0.382887	0.624228	7.97211e-05	-0.0510744	0.774219	-0.0368035	0.836289	-0.644837	3.8447e-05	0.690452	6.21498e-06	0.131178	0.459612	0.611629	0.000121436	0.197085	0.263905	-0.70919	2.66531e-06	-0.330947	0.055899	0.31134	0.0730768	-0.505751	0.00227823
ENSG00000204681	GABBR1	2550	bisque4	0.00451204	0.979795	-0.227193	0.196297	-0.28847	0.098021	-0.0751405	0.672769	0.157292	0.374324	-0.0396505	0.823816	-0.490949	0.00319646	0.443751	0.00856842	0.0277103	0.876377	0.301619	0.0829936	-0.681276	9.20006e-06	-0.334036	0.0535126	-0.725103	1.23156e-06	0.11923	0.501826	0.863098	5.15201e-11	-0.00194472	0.991291	-0.716739	1.8599e-06	0.46252	0.00588394
ENSG00000224086	LL22NC03-86G7.1	NA	bisque4	0.0538316	0.762371	-0.376214	0.0283138	-0.313074	0.0714093	0.113316	0.523418	0.14041	0.428341	-0.131912	0.457083	-0.591731	0.000227864	0.294864	0.0904749	0.148721	0.401229	0.406502	0.0170477	-0.739054	5.98486e-07	-0.07497	0.673471	-0.642147	4.24156e-05	-0.0556906	0.754413	0.851089	1.80679e-10	0.115886	0.51398	-0.688581	6.7401e-06	0.490434	0.00323348
ENSG00000046651	OFD1	8481	bisque4	0.0123492	0.944737	0.0687015	0.699446	-0.228838	0.192989	-0.252729	0.149285	0.188709	0.285145	-0.13878	0.433774	-0.342268	0.0475467	0.563392	0.000521762	-0.362779	0.0349741	0.283094	0.104729	-0.508566	0.00213249	-0.37981	0.0267199	-0.849666	2.08136e-10	0.243609	0.165028	0.778153	6.07144e-08	-0.206932	0.240298	-0.561592	0.000548581	0.581074	0.000313941
ENSG00000226803	RP11-203B9.4	NA	bisque4	0.174606	0.323324	0.0376955	0.832377	-0.187683	0.28782	0.177989	0.313888	0.305812	0.0785967	-0.33105	0.0558181	-0.597322	0.000191731	0.247036	0.158978	-0.0452155	0.799559	0.510763	0.00202442	-0.65437	2.6937e-05	-0.161031	0.362927	-0.686133	7.48817e-06	0.0794343	0.655193	0.755383	2.42318e-07	0.0398521	0.822934	-0.490321	0.00324168	0.573598	0.000390529
ENSG00000227201	CNN2P1	NA	bisque4	0.162482	0.358562	0.039641	0.823857	-0.34547	0.045375	0.428558	0.0114461	0.509725	0.00207488	-0.318136	0.0667112	-0.811829	5.66008e-09	-0.121778	0.492663	0.154996	0.381423	0.747612	3.7579e-07	-0.791134	2.56042e-08	-0.158393	0.370946	-0.603194	0.00015938	-0.0366213	0.837089	0.773407	8.20798e-08	0.466271	0.00544454	-0.269858	0.122718	0.467729	0.0052815
ENSG00000167525	PROCA1	147011	bisque4	0.0818897	0.645223	-0.0645745	0.716735	-0.0994671	0.575694	-0.207433	0.239137	0.0780787	0.660723	0.0581302	0.744007	-0.244817	0.162877	0.563614	0.000518537	-0.103135	0.561622	0.10411	0.557909	-0.485648	0.00359577	-0.497628	0.00274865	-0.623769	8.09777e-05	0.106017	0.55068	0.637015	5.10234e-05	-0.219751	0.211752	-0.696723	4.7146e-06	0.472776	0.0047492
ENSG00000146063	TRIM41	90933	bisque4	-0.170951	0.333713	-0.33577	0.0522089	-0.34352	0.0466875	0.252146	0.150259	-0.0249065	0.888804	-0.0695964	0.695717	-0.511424	0.00199287	-0.0441332	0.804263	0.512605	0.00193756	0.223886	0.203065	-0.53755	0.00104362	0.0277265	0.876305	-0.219595	0.212086	0.1618	0.360611	0.5964	0.000197306	0.374766	0.0289775	-0.50959	0.0020815	-0.0261655	0.88322
ENSG00000280020	CTD-2095E4.4	NA	bisque4	0.163629	0.355133	-0.207703	0.238512	-0.336838	0.0514188	0.460434	0.00614127	0.333851	0.0536531	-0.139908	0.430008	-0.667806	1.59673e-05	-0.236407	0.178274	0.359645	0.0366977	0.629488	6.6511e-05	-0.685395	7.72799e-06	0.0664129	0.709016	-0.311324	0.073093	-0.321025	0.06414	0.534473	0.0011293	0.497918	0.00273045	-0.193075	0.27394	0.298742	0.0861189
ENSG00000165359	DDX26B	203522	bisque4	0.0361601	0.839114	-0.109139	0.538938	-0.252331	0.149949	-0.237762	0.175726	0.158672	0.370094	-0.070862	0.690454	-0.387197	0.0236764	0.615263	0.000107752	-0.257847	0.140944	0.284508	0.102933	-0.604799	0.00015143	-0.444614	0.00842539	-0.859488	7.60346e-11	0.142446	0.421605	0.850854	1.84968e-10	-0.205957	0.24257	-0.693782	5.37154e-06	0.615921	0.000105431
ENSG00000157184	CPT2	1376	bisque4	0.201253	0.253733	0.0939492	0.597156	0.681284	9.19674e-06	-0.0674668	0.704603	-0.333559	0.0538756	0.0393206	0.825259	0.550043	0.000751662	0.0499588	0.779028	0.206467	0.241381	-0.707038	2.94721e-06	0.534556	0.0011269	0.0921062	0.604401	0.640237	4.54532e-05	0.148737	0.401175	-0.617816	9.89867e-05	-0.422581	0.0127829	-0.0244218	0.890955	-0.491392	0.00316492
ENSG00000185883	ATP6V0C	527	bisque4	0.0520708	0.769932	-0.201143	0.253998	-0.214176	0.223865	0.290967	0.0950186	0.122266	0.490916	-0.274486	0.116183	-0.602565	0.000162594	0.0476559	0.788979	0.323759	0.0617795	0.34858	0.0433425	-0.615727	0.000106111	0.0211891	0.905319	-0.402251	0.0183553	0.0967014	0.586408	0.717122	1.82566e-06	0.230873	0.188953	-0.552077	0.000711695	0.171325	0.332639
ENSG00000143319	ISG20L2	81875	bisque4	0.108009	0.543174	0.120982	0.495515	0.00939898	0.957926	0.45992	0.00620606	0.293139	0.0924645	0.0459657	0.796303	-0.0242239	0.891833	-0.693058	5.54547e-06	0.26412	0.131193	0.239448	0.172591	0.109147	0.538906	0.0166667	0.925464	0.46255	0.00588031	-0.375459	0.0286583	-0.476422	0.00439398	0.516222	0.00177643	0.670754	1.41858e-05	-0.221609	0.207818
ENSG00000155729	KCTD18	130535	bisque4	0.0137577	0.938446	0.195031	0.269015	0.319631	0.0653707	0.0662017	0.709901	-0.136506	0.441417	0.016222	0.927447	0.43395	0.0103433	-0.460636	0.00611592	-0.00310976	0.986074	-0.336842	0.0514154	0.655915	2.53976e-05	0.3372	0.0511525	0.685557	7.67485e-06	0.144159	0.415985	-0.772872	8.48789e-08	0.0104388	0.953276	0.659617	2.20283e-05	-0.591189	0.000231667
ENSG00000159352	PSMD4	5710	bisque4	-0.427007	0.0117812	-0.0977687	0.582263	0.13866	0.434175	-0.407635	0.0167124	-0.589943	0.000240634	0.437914	0.0095912	0.816135	4.03974e-09	-0.11061	0.533447	-0.113136	0.52408	-0.701303	3.83612e-06	0.898057	5.97497e-13	0.377264	0.027841	0.770196	1.0024e-07	-0.00999221	0.955273	-0.889021	2.17455e-12	-0.220433	0.210303	0.503234	0.00241585	-0.58391	0.000288593
ENSG00000261324	RP11-174G6.5	NA	bisque4	0.0492883	0.781921	-0.0700212	0.693949	-0.237476	0.176261	-0.0995054	0.575547	0.14477	0.413992	-0.153629	0.38569	-0.442899	0.00871162	0.49576	0.00286805	-0.116727	0.510906	0.307182	0.0771993	-0.608144	0.000136001	-0.31243	0.0720257	-0.764002	1.46113e-07	0.10579	0.551538	0.816818	3.82636e-09	-0.126611	0.47552	-0.697682	4.51687e-06	0.563488	0.00052037
ENSG00000134262	AP4B1	10717	bisque4	0.108968	0.539579	-0.109571	0.537321	-0.249157	0.155316	0.0613846	0.730194	0.308977	0.0753978	-0.327129	0.0589649	-0.624353	7.93805e-05	0.280824	0.107663	0.0226206	0.898955	0.408843	0.0163612	-0.67926	1.00093e-05	-0.192282	0.275954	-0.75211	2.92069e-07	0.196173	0.266167	0.902278	3.13332e-13	0.0761605	0.668578	-0.575595	0.000368598	0.373359	0.0296343
ENSG00000262848	RP11-517A5.5	NA	bisque4	0.0631844	0.72259	0.0153839	0.931186	-0.238126	0.175045	0.0566443	0.75034	0.123727	0.48571	-0.167347	0.344154	-0.490303	0.00324297	0.254317	0.146659	0.0904493	0.610946	0.289464	0.0968176	-0.578675	0.000336918	-0.297893	0.0870582	-0.593096	0.000218519	0.178872	0.311455	0.758089	2.07191e-07	0.042795	0.810088	-0.587346	0.000260326	0.312315	0.0721353
ENSG00000120798	NR2C1	7181	bisque4	0.0969698	0.585365	-0.18832	0.286155	-0.308702	0.0756721	-0.060765	0.732817	0.264119	0.131194	-0.214475	0.223204	-0.570348	0.000428718	0.440241	0.00917158	-0.132018	0.456718	0.432255	0.0106798	-0.707965	2.82254e-06	-0.306266	0.0781311	-0.868289	2.88592e-11	0.102498	0.564054	0.934474	6.62524e-16	-0.0351809	0.843416	-0.640074	4.5721e-05	0.568755	0.00044861
ENSG00000198961	PJA2	9867	bisque4	0.189697	0.282583	0.240138	0.171321	-0.0673449	0.705113	0.423325	0.0126097	0.425878	0.0120302	0.0197906	0.911543	-0.143819	0.417097	-0.607617	0.000138331	0.0652498	0.713896	0.42665	0.0118593	-0.0431585	0.808505	-0.180617	0.30668	0.189917	0.282014	-0.329607	0.0569604	-0.303591	0.0809029	0.486907	0.00349721	0.648788	3.32247e-05	-0.0243442	0.891299
ENSG00000159200	RCAN1	1827	bisque4	-0.0260011	0.883949	0.120291	0.497998	0.476389	0.00439709	-0.230425	0.189836	-0.386717	0.0238652	0.0148699	0.93348	0.738735	6.08748e-07	-0.0235374	0.894882	-0.178244	0.313186	-0.627879	7.03249e-05	0.828796	1.42142e-09	0.283929	0.103665	0.66946	1.49442e-05	0.0135531	0.939359	-0.859647	7.47652e-11	-0.445986	0.00820204	0.429675	0.0112099	-0.454945	0.00686474
ENSG00000275881	Metazoa_SRP	NA	bisque4	0.180117	0.308043	0.103508	0.5602	-0.0338673	0.849194	-0.0234373	0.895326	0.129668	0.464839	-0.269389	0.123395	-0.279656	0.109197	0.445652	0.00825591	-0.197071	0.26394	0.250039	0.15381	-0.398859	0.0194576	-0.347322	0.044156	-0.575065	0.000374316	-0.0280821	0.874731	0.528442	0.00131533	-0.271838	0.11989	-0.506664	0.00223002	0.533026	0.00117168
ENSG00000211450	C11orf31	280636	bisque4	-0.016206	0.927518	0.178531	0.312392	0.435149	0.0101106	-0.0686305	0.699743	-0.209946	0.233366	0.198854	0.259556	0.581314	0.000311724	-0.371922	0.0303181	0.0912127	0.607927	-0.570367	0.000428477	0.757497	2.14453e-07	0.29813	0.0867954	0.842832	4.0249e-10	0.0662282	0.70979	-0.870206	2.31561e-11	-0.0530512	0.76572	0.600682	0.000172565	-0.696282	4.80828e-06
ENSG00000185453	C19orf68	374920	bisque4	0.0294253	0.86879	-0.0421697	0.812814	0.515668	0.00180033	-0.173618	0.326111	-0.405307	0.017407	0.319125	0.0658216	0.626955	7.26052e-05	0.0547836	0.758293	0.0948921	0.593465	-0.680059	9.68104e-06	0.612799	0.000116871	0.185544	0.293448	0.691901	5.83412e-06	0.116132	0.513078	-0.719113	1.65696e-06	-0.36629	0.0331216	0.109784	0.536528	-0.415819	0.0144518
ENSG00000224138	AC000123.4	NA	bisque4	-0.0968743	0.585736	-0.1043	0.557188	-0.177042	0.316512	-0.166224	0.347449	-0.0727405	0.682669	-0.0879088	0.621039	-0.194102	0.271345	0.47117	0.00491333	-0.16798	0.342306	0.136912	0.440046	-0.372432	0.030074	-0.348308	0.0435176	-0.538559	0.00101679	0.136026	0.44304	0.554559	0.000665474	-0.209995	0.233254	-0.545523	0.000847668	0.468261	0.0052231
ENSG00000144711	IQSEC1	9922	bisque4	0.275719	0.114488	-0.000611251	0.997263	-0.227197	0.196289	0.721631	1.46401e-06	0.53655	0.00107082	-0.325258	0.0605143	-0.876388	1.11077e-11	-0.379568	0.026825	0.60744	0.000139125	0.703568	3.45944e-06	-0.873314	1.60817e-11	-0.219721	0.211816	-0.335919	0.0520981	-0.0875795	0.622353	0.6709	1.41025e-05	0.683056	8.53521e-06	-0.284123	0.103419	0.198768	0.259766
ENSG00000261471	RP11-61F12.1	NA	bisque4	0.241534	0.168769	0.0484984	0.785334	-0.230449	0.189789	0.243229	0.165708	0.499402	0.00263926	-0.287112	0.0996844	-0.70026	4.02188e-06	0.163945	0.354193	-0.0452338	0.79948	0.643531	4.03295e-05	-0.74977	3.33196e-07	-0.165588	0.349323	-0.732724	8.34895e-07	-0.0547649	0.758373	0.790591	2.65769e-08	0.212807	0.226912	-0.419041	0.0136352	0.644505	3.89176e-05
ENSG00000123268	ATF1	466	bisque4	-0.208566	0.236522	0.0747647	0.674316	0.214314	0.223561	-0.601697	0.000167125	-0.463827	0.00572756	0.246376	0.160131	0.839788	5.34579e-10	0.318778	0.0661328	-0.569637	0.000437501	-0.592362	0.000223497	0.787188	3.34979e-08	0.0357029	0.841122	0.309556	0.0748243	0.0138306	0.93812	-0.677606	1.07213e-05	-0.629025	6.75896e-05	0.336757	0.051478	-0.137391	0.438435
ENSG00000010219	DYRK4	8798	bisque4	-0.0170547	0.923733	0.16475	0.351802	0.43706	0.00974912	-0.301061	0.0835931	-0.337805	0.0507108	-0.0380521	0.830814	0.610883	0.000124431	0.131758	0.45761	-0.232412	0.185938	-0.579133	0.000332415	0.64893	3.30501e-05	-0.0158499	0.929107	0.416506	0.0142743	0.0528376	0.766637	-0.593392	0.000216542	-0.502669	0.0024477	0.225645	0.199445	-0.341253	0.048252
ENSG00000108039	XPNPEP1	7511	bisque4	-0.0139758	0.937472	-0.187872	0.287324	-0.503259	0.00241448	0.366544	0.0329908	0.427266	0.0117246	-0.0815176	0.64673	-0.662614	1.96034e-05	-0.379959	0.0266555	0.224093	0.202636	0.664649	1.80972e-05	-0.60845	0.000134659	-0.0679346	0.702648	-0.382942	0.0253924	-0.0711915	0.689086	0.546262	0.000831283	0.652835	2.85486e-05	0.0587986	0.741163	0.191141	0.278868
ENSG00000181982	CCDC149	91050	bisque4	0.0867193	0.625789	0.136821	0.440353	0.250894	0.152361	0.0910701	0.60849	-0.0388669	0.827245	-0.0558159	0.753877	0.29963	0.0851455	-0.21195	0.228832	-0.0497634	0.779871	-0.140518	0.427981	0.372664	0.0299633	0.355478	0.039096	0.423743	0.0125132	-0.200907	0.254569	-0.532742	0.00118017	-0.0642158	0.718244	0.443586	0.00859601	-0.169913	0.3367
ENSG00000213865	C8orf44	56260	bisque4	0.0983684	0.57994	-0.226493	0.197716	-0.137213	0.439033	-0.206002	0.242465	0.0144091	0.935537	-0.118762	0.503515	-0.233465	0.183896	0.562608	0.000533308	-0.187173	0.289156	0.127172	0.473551	-0.398721	0.0195035	-0.127504	0.472385	-0.64161	4.32498e-05	0.0580287	0.744439	0.61989	9.23424e-05	-0.329253	0.0572434	-0.638297	4.87377e-05	0.426	0.012003
ENSG00000215883	CYB5RL	606495	bisque4	0.0478711	0.788047	-0.0278212	0.875886	0.0781482	0.660439	-0.251989	0.150521	-0.115116	0.516796	-0.26753	0.126106	-0.139971	0.429798	0.64735	3.50466e-05	-0.105438	0.552871	-0.133497	0.451643	-0.263635	0.131928	0.0192078	0.914138	-0.502549	0.00245456	0.275027	0.115437	0.591699	0.000228082	-0.437741	0.00962296	-0.773021	8.40881e-08	0.268644	0.124476
ENSG00000161265	U2AF1L4	199746	bisque4	0.071367	0.688358	-0.157967	0.372251	-0.349366	0.0428406	0.246256	0.160342	0.3513	0.0416256	-0.285396	0.101815	-0.748373	3.60226e-07	0.049432	0.781301	0.210552	0.231989	0.530327	0.00125449	-0.770607	9.77276e-08	-0.155981	0.378368	-0.655009	2.629e-05	0.187499	0.288302	0.903204	2.70918e-13	0.335752	0.0522223	-0.495992	0.00285298	0.290067	0.0960934
ENSG00000171723	GPHN	10243	bisque4	-0.206842	0.240507	-0.107333	0.545713	0.163438	0.355702	-0.339134	0.0497513	-0.50405	0.00237049	0.133722	0.450875	0.665567	1.74524e-05	0.202085	0.251735	-0.271723	0.120053	-0.510145	0.00205434	0.635533	5.37873e-05	0.158136	0.371733	0.372615	0.0299866	-0.0470033	0.791804	-0.602729	0.000161749	-0.460952	0.00607651	0.206102	0.242232	-0.22652	0.19766
ENSG00000240729	CTD-2301A4.3	NA	bisque4	0.208196	0.237375	-0.0938967	0.597362	-0.350529	0.042107	0.140148	0.429209	0.372538	0.0300236	0.0941912	0.596208	-0.525218	0.00142543	0.172467	0.329378	-0.136854	0.440242	0.646264	3.64819e-05	-0.677585	1.07304e-05	-0.367112	0.0326998	-0.663842	1.8681e-05	-0.217643	0.216278	0.601311	0.000169175	0.158764	0.369813	-0.287496	0.0992111	0.732545	8.42691e-07
ENSG00000140632	GLYR1	84656	bisque4	-0.289328	0.0969814	-0.106359	0.549386	0.326688	0.0593275	-0.465227	0.00556386	-0.649021	3.29378e-05	0.396646	0.0202062	0.843843	3.65807e-10	0.177553	0.315095	-0.0669307	0.706847	-0.827095	1.64358e-09	0.791225	2.54451e-08	0.353766	0.0401169	0.674746	1.20612e-05	0.0437414	0.805967	-0.764251	1.43954e-07	-0.485911	0.00357492	0.163422	0.35575	-0.452238	0.00724765
ENSG00000247077	PGAM5	192111	bisque4	-0.0182976	0.918193	-0.00787506	0.964743	0.578318	0.000340464	-0.186566	0.29075	-0.534158	0.00113842	0.150741	0.394788	0.691667	5.89419e-06	0.100456	0.571884	0.157787	0.372803	-0.805908	8.8773e-09	0.664413	1.82664e-05	0.170835	0.334046	0.739399	5.87553e-07	0.0872713	0.623583	-0.72173	1.4569e-06	-0.462054	0.0059406	0.0245606	0.890339	-0.543165	0.000901933
ENSG00000138095	LRPPRC	10128	bisque4	0.0336203	0.850282	0.0892238	0.615807	0.519172	0.00165378	-0.32413	0.0614646	-0.418632	0.0137365	0.0586811	0.741663	0.714625	2.05936e-06	0.299702	0.0850666	-0.241148	0.169472	-0.641016	4.41916e-05	0.67879	1.02072e-05	0.194083	0.271394	0.462996	0.0058266	-0.0860241	0.628571	-0.666008	1.71503e-05	-0.655064	2.62347e-05	0.0882482	0.619687	-0.193823	0.27205
ENSG00000189423	USP32P3	NA	bisque4	0.0198366	0.911338	-0.18815	0.2866	-0.372726	0.0299339	-0.0349131	0.844593	0.201996	0.251947	-0.116436	0.511971	-0.514692	0.00184308	0.401709	0.0185278	-0.110196	0.53499	0.447384	0.00797979	-0.694186	5.2767e-06	-0.417969	0.0139024	-0.810834	6.11151e-09	0.126632	0.475444	0.847719	2.51981e-10	0.0129467	0.942068	-0.579742	0.000326524	0.580961	0.000314995
ENSG00000237484	AP000476.1	NA	bisque4	0.0447675	0.801505	-0.0903394	0.611382	-0.430219	0.0110962	0.043781	0.805795	0.222247	0.206479	-0.0359002	0.840255	-0.404231	0.0177362	0.192313	0.275875	-0.248548	0.156362	0.548285	0.000787811	-0.495844	0.00286257	-0.244188	0.163994	-0.649991	3.1767e-05	-0.176467	0.318112	0.533932	0.00114499	0.0979953	0.581385	-0.214398	0.223375	0.620517	9.04136e-05
ENSG00000080503	SMARCA2	6595	bisque4	0.0377717	0.832043	0.0830424	0.640562	0.41694	0.0141632	-0.301613	0.0829999	-0.426642	0.0118611	0.119416	0.501154	0.688186	6.85602e-06	0.349707	0.0426245	-0.272053	0.119586	-0.520285	0.00160951	0.567188	0.000468989	0.0192794	0.913819	0.36596	0.0332923	-0.287181	0.0995987	-0.628246	6.94394e-05	-0.657146	2.42287e-05	0.040265	0.821129	-0.0120054	0.946274
ENSG00000204308	RNF5	6048	bisque4	-0.436279	0.00989547	0.079359	0.6555	0.162382	0.358862	-0.489652	0.00329044	-0.600473	0.000173702	0.464006	0.00570633	0.865091	4.13606e-11	-0.0232571	0.896127	-0.224802	0.201174	-0.734635	7.55808e-07	0.91748	2.34251e-14	0.209487	0.234412	0.702338	3.65955e-06	0.0687873	0.699088	-0.868723	2.74635e-11	-0.304046	0.0804257	0.470256	0.00500885	-0.538365	0.0010219
ENSG00000214787	MS4A4E	643680	bisque4	0.126239	0.476827	-0.137553	0.437891	-0.234793	0.181343	-0.0489858	0.783228	0.193434	0.27303	-0.187071	0.289421	-0.495301	0.00289804	0.522668	0.00151814	-0.154227	0.38382	0.403017	0.0181136	-0.684968	7.87009e-06	-0.341558	0.0480392	-0.835595	7.82834e-10	-0.00688495	0.969174	0.871781	1.92718e-11	-0.150351	0.396028	-0.712232	2.30867e-06	0.677256	1.08775e-05
ENSG00000091592	NLRP1	22861	bisque4	0.118873	0.503116	-0.079675	0.654213	-0.208378	0.236955	0.099033	0.57737	0.279243	0.109743	-0.362093	0.0353459	-0.633125	5.85667e-05	0.336811	0.0514386	0.0892879	0.615552	0.389717	0.0227059	-0.740528	5.53099e-07	-0.276145	0.113906	-0.752045	2.93144e-07	0.178627	0.312129	0.938302	2.60038e-16	0.0528282	0.766677	-0.698045	4.44396e-06	0.407661	0.0167049
ENSG00000137075	RNF38	152006	bisque4	0.0285583	0.872624	-0.017026	0.923861	0.327574	0.0586007	-0.359031	0.0370436	-0.357539	0.0378946	0.26177	0.134786	0.674373	1.22468e-05	0.306447	0.0779464	-0.43008	0.0111251	-0.420927	0.0131754	0.58388	0.00028885	0.0911176	0.608303	0.325266	0.0605082	-0.256245	0.143517	-0.636848	5.13298e-05	-0.59043	0.000237092	0.187311	0.288793	0.0642406	0.71814
ENSG00000218226	TATDN2P2	NA	bisque4	0.379093	0.027032	-0.0456581	0.797638	-0.150519	0.395494	0.385411	0.0243847	0.486203	0.00355202	-0.474276	0.00460018	-0.758514	2.02121e-07	0.0924787	0.602934	0.0387725	0.827658	0.693722	5.38571e-06	-0.795928	1.83284e-08	-0.236434	0.178222	-0.708724	2.72421e-06	-0.100017	0.573574	0.797727	1.61311e-08	0.162208	0.359384	-0.420856	0.0131925	0.597284	0.000191955
ENSG00000075407	ZNF37A	7587	bisque4	-0.15704	0.375099	-0.307144	0.0772372	-0.494971	0.00291979	-0.19939	0.258247	0.0615627	0.72944	0.199592	0.257755	-0.360734	0.0360911	0.485551	0.00360342	-0.121801	0.49258	0.366293	0.0331201	-0.631349	6.23326e-05	-0.442858	0.0087186	-0.736432	6.87736e-07	-0.133451	0.451801	0.749118	3.45564e-07	0.0122344	0.94525	-0.61674	0.0001026	0.667837	1.59473e-05
ENSG00000141551	CSNK1D	1453	bisque4	0.0403747	0.82065	-0.0915841	0.60646	-0.463131	0.00581039	0.378852	0.0271375	0.38716	0.023691	-0.343069	0.0469958	-0.801279	1.24887e-08	-0.0964175	0.587513	0.243836	0.164622	0.684414	8.05785e-06	-0.797637	1.62352e-08	-0.176182	0.318906	-0.634592	5.56124e-05	0.00155519	0.993035	0.858299	8.62362e-11	0.466978	0.00536493	-0.367671	0.0324156	0.347118	0.0442884
ENSG00000156671	SAMD8	142891	bisque4	0.372201	0.0301842	0.0153222	0.931462	-0.334187	0.0533984	0.477522	0.00429137	0.725679	1.19644e-06	-0.349873	0.0425192	-0.879125	7.92391e-12	-0.128618	0.468494	0.10172	0.567032	0.902465	3.0432e-13	-0.890365	1.80731e-12	-0.240993	0.169756	-0.720797	1.52554e-06	-0.210632	0.231807	0.79553	1.88512e-08	0.475602	0.00447182	-0.199342	0.258363	0.57467	0.000378622
ENSG00000170266	GLB1	2720	bisque4	-0.323632	0.0618876	0.03739	0.833716	0.248691	0.156115	-0.309505	0.0748748	-0.492257	0.00310412	0.350979	0.0418258	0.771771	9.09147e-08	-0.183468	0.298978	-0.0510373	0.774379	-0.692368	5.71596e-06	0.863521	4.9188e-11	0.268382	0.124858	0.79974	1.39619e-08	0.0463586	0.794599	-0.87941	7.64623e-12	-0.182039	0.302823	0.52894	0.001299	-0.652398	2.90228e-05
ENSG00000279978	chr22-38_28785274-29006793.1	NA	bisque4	0.00919081	0.958857	-0.290698	0.0953388	-0.521883	0.00154772	0.15346	0.386218	0.310817	0.0735862	-0.107226	0.546118	-0.694419	5.22266e-06	0.136703	0.440752	0.0424618	0.811541	0.652701	2.86936e-05	-0.794449	2.03393e-08	-0.124832	0.481792	-0.745517	4.21842e-07	-0.0944675	0.595126	0.873639	1.54727e-11	0.305143	0.079286	-0.433068	0.0105173	0.574751	0.000377733
ENSG00000143457	GOLPH3L	55204	bisque4	-0.0344587	0.846592	-0.206506	0.241289	-0.216677	0.218375	-0.307634	0.0767428	-0.0295625	0.868184	0.0946881	0.594262	-0.228372	0.193922	0.698935	4.26973e-06	-0.172673	0.328792	0.117338	0.508682	-0.537	0.0010585	-0.453991	0.00699762	-0.724872	1.24593e-06	0.0901915	0.611968	0.738151	6.27941e-07	-0.282709	0.105223	-0.794995	1.95748e-08	0.581279	0.000312043
ENSG00000164776	PHKG1	5260	bisque4	0.251007	0.152171	-0.00757161	0.966101	-0.0990062	0.577474	0.231762	0.187206	0.445929	0.00821129	-0.339811	0.0492684	-0.63783	4.95596e-05	0.179438	0.309901	0.0123229	0.944855	0.514861	0.00183561	-0.702844	3.57594e-06	-0.409101	0.016287	-0.657445	2.3952e-05	0.106174	0.550086	0.761735	1.67252e-07	0.117916	0.506584	-0.438697	0.00944826	0.514788	0.00183883
ENSG00000212607	SNORA45B	677826	bisque4	0.0215926	0.903525	0.0892347	0.615763	-0.237616	0.175998	-0.0595913	0.737795	0.306213	0.0781854	-0.133431	0.45187	-0.451782	0.0073139	0.312831	0.0716413	-0.0906489	0.610156	0.342014	0.0477222	-0.567079	0.00047043	-0.248735	0.156039	-0.668244	1.56901e-05	0.0945233	0.594907	0.745269	4.27605e-07	0.0679741	0.702483	-0.450886	0.00744562	0.438957	0.00940118
ENSG00000105583	WDR83OS	51398	bisque4	-0.0320289	0.857294	0.215728	0.220447	0.190872	0.279558	0.115835	0.514166	-0.00650178	0.970889	0.103117	0.561692	0.32827	0.0580346	-0.625483	7.63719e-05	0.0623005	0.726321	-0.21233	0.227979	0.596379	0.000197436	0.286828	0.100034	0.700514	3.97605e-06	-0.040822	0.818695	-0.744785	4.39118e-07	0.214799	0.222489	0.82392	2.14633e-09	-0.610664	0.000125321
ENSG00000129467	ADCY4	196883	bisque4	0.105529	0.552525	-0.255002	0.145538	-0.34756	0.0440007	0.0659088	0.71113	0.300468	0.0842335	-0.182404	0.301839	-0.646532	3.61223e-05	0.318105	0.0667387	0.037005	0.835405	0.5009	0.00254987	-0.770584	9.78662e-08	-0.188035	0.286901	-0.790665	2.64438e-08	0.00828729	0.962899	0.919232	1.68293e-14	0.104141	0.55779	-0.619917	9.22573e-05	0.532584	0.00118491
ENSG00000100591	AHSA1	10598	bisque4	-0.291947	0.0938601	-0.0407315	0.819091	0.338532	0.0501841	-0.606657	0.000142675	-0.67239	1.32772e-05	0.411233	0.0156848	0.9118	6.51759e-14	0.343586	0.046643	-0.259323	0.138604	-0.867311	3.22496e-11	0.828981	1.3991e-09	0.16837	0.34117	0.564613	0.000504235	0.0634005	0.721679	-0.720116	1.5775e-06	-0.629402	6.67113e-05	0.103004	0.562123	-0.359292	0.036896
ENSG00000230163	RP5-997D16.2	NA	bisque4	0.226019	0.198681	-0.013705	0.938681	0.143304	0.418786	-0.0359971	0.839829	0.0739385	0.677721	-0.364494	0.0340589	-0.247362	0.158412	0.420977	0.0131635	-0.00256136	0.98853	-0.00193896	0.991317	-0.344949	0.0457226	-0.226285	0.198138	-0.45957	0.00625059	0.273917	0.116973	0.561209	0.00055445	-0.295789	0.0894211	-0.610494	0.000126017	0.189121	0.284075
ENSG00000073605	GSDMB	55876	bisque4	0.075461	0.671451	-0.107211	0.546176	-0.13553	0.444719	-0.115199	0.516495	0.154227	0.383819	-0.206271	0.241837	-0.435345	0.0100731	0.548837	0.000776304	-0.0686338	0.699729	0.218456	0.214526	-0.613384	0.000114645	-0.350959	0.0418378	-0.742647	4.93337e-07	0.202596	0.250512	0.856131	1.08174e-10	-0.162728	0.357824	-0.76246	1.60203e-07	0.477616	0.00428273
ENSG00000091157	WDR7	23335	bisque4	0.0576291	0.746141	0.243939	0.164437	0.363433	0.034623	-0.11059	0.533521	-0.271938	0.119748	0.129541	0.465282	0.5768	0.000355898	-0.014432	0.935435	-0.0808429	0.649466	-0.407733	0.0166838	0.525634	0.00141076	8.04251e-05	0.99964	0.511371	0.00199541	-0.182657	0.301155	-0.681527	9.10363e-06	-0.313756	0.0707619	0.292486	0.0932269	-0.22175	0.207521
ENSG00000124549	BTN2A3P	54718	bisque4	0.0832613	0.639679	-0.145665	0.411081	0.109292	0.538365	-0.375733	0.0285329	-0.127021	0.474081	0.102757	0.563066	0.00024521	0.998902	0.732733	8.34494e-07	-0.108762	0.540348	-0.215247	0.221503	-0.259969	0.137588	-0.245996	0.160798	-0.444826	0.00839053	0.174527	0.323546	0.477389	0.00430369	-0.495338	0.00289559	-0.777897	6.17233e-08	0.332416	0.0547536
ENSG00000140350	ANP32A	8125	bisque4	-0.163158	0.356539	0.122407	0.490412	0.315307	0.0693056	-0.310926	0.0734797	-0.400338	0.0189703	0.304912	0.0795242	0.748271	3.62277e-07	-0.0854726	0.630782	-0.231578	0.187567	-0.584129	0.000286711	0.821471	2.62724e-09	0.33946	0.0495187	0.672872	1.302e-05	-0.00781791	0.964999	-0.878982	8.06586e-12	-0.305299	0.0791248	0.528989	0.00129743	-0.416196	0.0143542
ENSG00000119703	ZC2HC1C	79696	bisque4	0.188564	0.285522	-0.161433	0.361715	-0.267987	0.125435	0.236355	0.178372	0.357638	0.0378372	-0.0691493	0.697579	-0.676132	1.13939e-05	0.0942436	0.596003	0.158167	0.371639	0.548148	0.000790683	-0.768379	1.12093e-07	-0.29225	0.093504	-0.593809	0.000213781	-0.135752	0.443968	0.776536	6.73392e-08	0.253054	0.148745	-0.482169	0.00388064	0.463528	0.00576304
ENSG00000162086	ZNF75A	7627	bisque4	-0.0613221	0.730458	-0.185322	0.294036	-0.354833	0.0394779	-0.256414	0.143245	0.150335	0.39608	0.0121689	0.945543	-0.365748	0.0334026	0.558845	0.000591878	-0.286418	0.100542	0.336284	0.0518274	-0.585764	0.000273022	-0.422954	0.0126959	-0.827246	1.6227e-09	0.0646735	0.716318	0.793659	2.14941e-08	-0.121371	0.49412	-0.584284	0.00028539	0.646483	3.61879e-05
ENSG00000186866	POFUT2	23275	bisque4	-0.0466466	0.79335	-0.0624122	0.725849	-0.587343	0.000260357	0.347529	0.0440209	0.498296	0.00270701	-0.234907	0.181125	-0.7967	1.73548e-08	-0.168956	0.339468	0.12627	0.47672	0.802206	1.1672e-08	-0.780898	5.08297e-08	-0.265659	0.128878	-0.655518	2.57854e-05	-0.101777	0.566816	0.789353	2.89263e-08	0.585917	0.000271769	-0.158838	0.369586	0.420169	0.0133587
ENSG00000090470	PDCD7	10081	bisque4	0.148067	0.403324	0.115873	0.514026	0.544715	0.000865932	-0.273927	0.11696	-0.309622	0.074759	0.112339	0.527029	0.702567	3.62147e-06	0.228504	0.193658	-0.227472	0.195733	-0.579801	0.000325951	0.649266	3.26388e-05	-0.0128299	0.94259	0.47059	0.00497381	-0.141111	0.426014	-0.713773	2.14514e-06	-0.611932	0.000120239	0.160619	0.364174	-0.185918	0.29246
ENSG00000170049	KCNAB3	9196	bisque4	0.0324448	0.855461	-0.124831	0.481796	-0.340968	0.0484518	0.0612122	0.730923	0.289901	0.0962917	-0.275537	0.114737	-0.644418	3.90419e-05	0.30478	0.0796613	0.0402835	0.821048	0.462278	0.00591334	-0.753771	2.65756e-07	-0.275255	0.115124	-0.794717	1.99611e-08	0.150432	0.395771	0.949724	1.06729e-17	0.132285	0.455799	-0.627188	7.20233e-05	0.47392	0.00463518
ENSG00000198520	C1orf228	339541	bisque4	0.148325	0.402496	-0.111186	0.531303	0.00944772	0.957708	0.272113	0.119501	0.252496	0.149674	-0.354634	0.0395969	-0.450939	0.00743777	-0.157869	0.372552	0.422189	0.0128752	0.117307	0.508797	-0.333565	0.0538709	0.118492	0.504494	-0.142768	0.420545	0.284841	0.102513	0.428447	0.0114698	0.247783	0.157681	-0.239528	0.172445	-0.197921	0.261842
ENSG00000175224	ATG13	9776	bisque4	-0.0564964	0.750971	-6.23525e-05	0.999721	0.320169	0.0648932	0.0714583	0.687979	-0.336547	0.0516327	0.318355	0.0665135	0.523174	0.00149932	-0.413371	0.0150995	0.268921	0.124074	-0.482256	0.00387324	0.613712	0.000113413	0.259105	0.138948	0.882475	5.18148e-12	-0.0872532	0.623655	-0.850061	2.00152e-10	0.0319011	0.857858	0.483593	0.00376171	-0.599541	0.000178873
ENSG00000260565	CTD-2270P14.1	NA	bisque4	0.0557247	0.754267	-0.137295	0.438758	-0.332171	0.0549438	-0.0114581	0.94872	0.306415	0.0779788	-0.165085	0.35081	-0.597236	0.000192241	0.354685	0.0395661	-0.0609403	0.732075	0.459357	0.0062778	-0.740721	5.47372e-07	-0.363083	0.0348107	-0.815634	4.20352e-09	0.11391	0.521229	0.926386	4.02152e-15	0.0877469	0.621685	-0.598249	0.00018626	0.534703	0.00112269
ENSG00000278976	NA	NA	bisque4	0.0283425	0.873579	-0.00925721	0.95856	-0.451796	0.00731176	0.176816	0.31714	0.377864	0.0275734	-0.219015	0.213325	-0.724355	1.27854e-06	0.142434	0.421645	0.0132497	0.940715	0.646786	3.57857e-05	-0.8013	1.24698e-08	-0.331975	0.0550959	-0.79012	2.74499e-08	0.0820362	0.64463	0.916948	2.58591e-14	0.300841	0.0838305	-0.452926	0.00714862	0.531835	0.00120762
ENSG00000245156	RP11-867G23.3	NA	bisque4	0.0482924	0.786225	-0.115524	0.515303	-0.361788	0.035512	0.0478546	0.788118	0.296186	0.0889709	-0.116936	0.510146	-0.634922	5.49662e-05	0.289352	0.0969527	0.00281024	0.987415	0.492316	0.00310001	-0.773461	8.1802e-08	-0.256729	0.142737	-0.793843	2.12204e-08	0.170073	0.336239	0.929746	1.95138e-15	0.152689	0.388639	-0.583226	0.000294532	0.535216	0.00110807
ENSG00000100347	SAMM50	25813	bisque4	-0.050164	0.778143	0.211574	0.229678	0.491309	0.00317084	-0.227404	0.19587	-0.411505	0.0156091	-0.0394022	0.824902	0.673069	1.29158e-05	-0.0363585	0.838243	-0.126346	0.476451	-0.67929	9.99679e-06	0.840009	5.23798e-10	0.526664	0.00137507	0.674538	1.21645e-05	0.114297	0.519805	-0.77498	7.43318e-08	-0.424531	0.0123331	0.357729	0.0377851	-0.552859	0.000696831
ENSG00000178761	FAM219B	57184	bisque4	0.00220159	0.990141	-0.153083	0.3874	-0.0355615	0.841743	-0.212057	0.228592	0.000636003	0.997152	-0.209951	0.233354	-0.17613	0.319052	0.449152	0.0077061	-0.0394853	0.824539	-0.0575511	0.746473	-0.239644	0.17223	-0.0555662	0.754945	-0.435006	0.0101382	0.145398	0.411949	0.511506	0.001989	-0.249786	0.154241	-0.552896	0.000696148	0.172018	0.330658
ENSG00000185215	TNFAIP2	7127	bisque4	0.0683053	0.7011	-0.163485	0.355562	-0.23314	0.184524	0.17888	0.311434	0.205103	0.244572	-0.159532	0.367471	-0.63559	5.36785e-05	0.190488	0.280544	0.349244	0.042918	0.311622	0.0728034	-0.753093	2.76213e-07	-0.214597	0.222935	-0.55707	0.000621431	0.207258	0.239542	0.86472	4.30939e-11	0.234273	0.18234	-0.70793	2.82722e-06	0.237265	0.176657
ENSG00000245532	NEAT1	NA	bisque4	0.0756889	0.670515	-0.131258	0.459337	-0.344268	0.0461808	0.0246695	0.889855	0.244822	0.162868	-0.222318	0.20633	-0.606819	0.000141935	0.395047	0.0207617	-0.102621	0.563584	0.502777	0.00244163	-0.750136	3.2643e-07	-0.254332	0.146636	-0.847966	2.45974e-10	0.0975683	0.583041	0.930523	1.64264e-15	0.0291955	0.869806	-0.629041	6.75525e-05	0.612403	0.000118398
ENSG00000268205	CTC-444N24.11	NA	bisque4	-0.0746211	0.674908	-0.281589	0.106667	-0.197786	0.262175	-0.395769	0.0205094	-0.167579	0.343477	0.0657601	0.711753	-0.0789438	0.657192	0.656229	2.5095e-05	-0.253951	0.147262	-0.0114336	0.948829	-0.322596	0.0627751	-0.322731	0.0626591	-0.631428	6.21605e-05	0.16859	0.34053	0.580648	0.000317918	-0.393083	0.0214614	-0.665361	1.75956e-05	0.434815	0.0101751
ENSG00000133466	C1QTNF6	114904	bisque4	0.0808538	0.649422	0.00318411	0.985741	-0.179402	0.309999	0.120094	0.498709	0.231379	0.187957	-0.32898	0.0574622	-0.556257	0.000635405	0.156874	0.375611	0.112193	0.52757	0.287938	0.0986702	-0.537276	0.00105102	-0.145103	0.412908	-0.55688	0.000624668	0.345657	0.0452506	0.770295	9.96302e-08	0.13072	0.461194	-0.505094	0.00231351	0.148809	0.400945
ENSG00000105855	ITGB8	3696	bisque4	0.126011	0.47763	-0.0447547	0.801561	-0.341749	0.0479065	0.385177	0.0244787	0.464695	0.00562555	-0.296985	0.0880722	-0.756833	2.22868e-07	-0.137099	0.439418	0.28228	0.105775	0.618617	9.63702e-05	-0.760967	1.75023e-07	-0.204946	0.244942	-0.554126	0.00067335	0.103037	0.561995	0.778096	6.09361e-08	0.461629	0.00599269	-0.297716	0.0872558	0.261667	0.134945
ENSG00000133063	CHIT1	1118	bisque4	-0.110973	0.532098	-0.178003	0.313849	-0.280438	0.108168	0.00430619	0.980717	0.0807733	0.649749	0.121953	0.492034	-0.374423	0.0291365	0.0782852	0.659879	0.231845	0.187045	0.184482	0.296269	-0.485089	0.00364027	0.000710459	0.996818	-0.309684	0.0746977	0.0465202	0.793898	0.556712	0.000627553	0.261561	0.135109	-0.404074	0.0177846	0.171123	0.333218
ENSG00000268575	RP1-283E3.8	NA	bisque4	0.363416	0.0346317	0.00174081	0.992204	-0.0968529	0.585819	0.166358	0.347055	0.408407	0.0164872	-0.407016	0.0168948	-0.601371	0.000168853	0.330762	0.0560446	-0.0847385	0.63373	0.515195	0.00182094	-0.694156	5.28361e-06	-0.295641	0.0895891	-0.776501	6.74862e-08	0.0602934	0.734816	0.792081	2.39839e-08	-0.0809569	0.649003	-0.541608	0.000939412	0.56076	0.000561392
ENSG00000109971	HSPA8	3312	bisque4	-0.328196	0.0580948	-0.00495926	0.977793	0.255675	0.144441	-0.3546	0.0396169	-0.571413	0.000415847	0.449085	0.00771633	0.821681	2.58249e-09	0.026079	0.883604	-0.039778	0.823258	-0.728192	1.05363e-06	0.775383	7.24585e-08	0.116415	0.512047	0.724482	1.2705e-06	-0.0432325	0.808183	-0.836598	7.15298e-10	-0.308153	0.0762211	0.293239	0.0923488	-0.467966	0.00525539
ENSG00000136710	CCDC115	84317	bisque4	-0.164749	0.351803	0.231417	0.187882	0.291767	0.0940722	-0.0983551	0.579992	-0.267726	0.125818	0.285019	0.102289	0.609471	0.00013028	-0.360704	0.0361076	-0.0242685	0.891635	-0.486367	0.00353919	0.75406	2.61398e-07	0.22834	0.193987	0.791154	2.55686e-08	-0.0112562	0.949622	-0.885345	3.56393e-12	-0.0192816	0.913809	0.65317	2.81892e-05	-0.551002	0.000732586
ENSG00000066923	STAG3	10734	bisque4	0.113796	0.52165	0.0274826	0.877385	-0.217865	0.2158	0.0345137	0.84635	0.245971	0.16084	-0.284478	0.10297	-0.521355	0.0015679	0.363683	0.0344895	-0.187377	0.288621	0.454881	0.00687357	-0.598399	0.00018539	-0.323535	0.0619701	-0.752997	2.77736e-07	0.0896221	0.614225	0.766916	1.22552e-07	-0.0668417	0.707219	-0.499953	0.00260604	0.590805	0.0002344
ENSG00000234329	RP11-767N6.2	NA	bisque4	0.454554	0.006919	0.0541772	0.76089	-0.140543	0.427898	0.368537	0.0319788	0.641946	4.27263e-05	-0.372138	0.0302142	-0.777321	6.40447e-08	0.0278655	0.87569	0.0338742	0.849164	0.706771	2.98397e-06	-0.780813	5.11102e-08	-0.244591	0.163277	-0.700961	3.89614e-06	-0.103945	0.558538	0.78704	3.3835e-08	0.233746	0.183355	-0.329851	0.0567662	0.546224	0.000832111
ENSG00000175455	CCDC14	64770	bisque4	0.0691436	0.697603	-0.11405	0.520712	-0.232156	0.186437	-0.130793	0.460941	0.189533	0.283008	-0.270269	0.122126	-0.477387	0.00430391	0.523435	0.00148969	-0.180421	0.307214	0.316153	0.0685214	-0.600838	0.000171721	-0.288253	0.0982855	-0.842083	4.3184e-10	0.189034	0.2843	0.887467	2.68511e-12	-0.159678	0.367027	-0.687156	7.16689e-06	0.523682	0.00148064
ENSG00000100749	VRK1	7443	bisque4	-0.053469	0.763927	0.238934	0.173543	0.00452418	0.979741	-0.21181	0.229147	-0.0113963	0.948996	0.192126	0.276351	0.351764	0.0413386	-0.0576289	0.746141	-0.461316	0.00603126	-0.0425307	0.81124	0.448511	0.00780442	0.0303024	0.864914	0.158821	0.369639	-0.189929	0.281984	-0.480166	0.00405335	-0.14506	0.413048	0.540536	0.000966012	0.0602092	0.735173
ENSG00000265681	RPL17	6139	bisque4	0.147666	0.404615	0.197482	0.262925	-0.235199	0.180567	0.275237	0.115149	0.481175	0.00396551	-0.304049	0.0804231	-0.682382	8.78158e-06	-0.102947	0.56234	0.133388	0.452017	0.526013	0.00139756	-0.626729	7.31714e-05	-0.311202	0.0732114	-0.539453	0.000993559	0.135565	0.444602	0.719093	1.65858e-06	0.395777	0.0205065	-0.2414	0.169013	0.215001	0.222045
ENSG00000128039	SRD5A3	79644	bisque4	-0.0686278	0.699754	0.0480738	0.78717	0.325716	0.0601323	-0.259411	0.138465	-0.37449	0.0291053	0.0245558	0.89036	0.561873	0.000544321	0.0978665	0.581884	-0.126756	0.47501	-0.537221	0.00105251	0.570573	0.000425972	0.00161939	0.992748	0.425595	0.0120933	-0.0657681	0.71172	-0.560291	0.000568723	-0.389728	0.0227019	0.172487	0.329323	-0.319281	0.0656825
ENSG00000251364	CTD-2516F10.2	100506258	bisque4	-0.0462028	0.795274	-0.307323	0.0770567	-0.323054	0.0623814	-0.100687	0.570996	0.0472512	0.790731	-0.0365186	0.837539	-0.382014	0.0257799	0.385758	0.0242456	-0.0967082	0.586382	0.288441	0.0980562	-0.518878	0.00166568	-0.453137	0.00711841	-0.638499	4.83851e-05	0.0496314	0.78044	0.69749	4.55587e-06	-0.0370865	0.835048	-0.545698	0.000843768	0.441056	0.00902834
ENSG00000123427	METTL21B	25895	bisque4	0.0296564	0.867769	0.0394479	0.824702	0.38883	0.023044	-0.257081	0.142171	-0.324578	0.0610861	0.056507	0.750926	0.608851	0.000132923	0.139171	0.432467	-0.210303	0.232554	-0.507844	0.00216905	0.570969	0.000421173	0.0094806	0.957561	0.409236	0.0162484	-0.103668	0.559591	-0.604053	0.000155081	-0.463989	0.00570833	0.210249	0.232676	-0.234529	0.181848
ENSG00000077713	SLC25A43	203427	bisque4	-0.205349	0.243994	-0.19753	0.262805	0.231023	0.188657	-0.321682	0.0635666	-0.42995	0.0111523	0.358093	0.0375766	0.669888	1.46895e-05	0.028952	0.870883	-0.094685	0.594275	-0.567738	0.000461738	0.640018	4.58137e-05	0.0972251	0.584373	0.583944	0.000288295	-0.180681	0.306506	-0.679642	9.85116e-06	-0.276026	0.114069	0.280302	0.108347	-0.286509	0.100429
ENSG00000065802	ASB1	51665	bisque4	0.202822	0.249973	-0.189181	0.28392	-0.21308	0.226303	0.237006	0.177145	0.305601	0.0788135	-0.296234	0.0889174	-0.636192	5.25424e-05	-0.0100928	0.954823	0.237567	0.17609	0.407293	0.0168131	-0.605897	0.000146201	0.00216863	0.990288	-0.487265	0.00346958	0.123286	0.487279	0.720343	1.55998e-06	0.254891	0.14572	-0.385129	0.0244981	0.166632	0.346249
ENSG00000101342	TLDC2	140711	bisque4	0.0478819	0.788	-0.125928	0.477922	-0.129429	0.465671	-0.20538	0.243923	-0.0165436	0.926012	-0.0211648	0.905427	-0.30439	0.0800669	0.660664	2.11522e-05	-0.111543	0.52998	0.125485	0.479485	-0.561456	0.00055066	-0.408191	0.0165501	-0.710915	2.4574e-06	0.171919	0.33094	0.779741	5.47992e-08	-0.299523	0.0852623	-0.847342	2.61388e-10	0.549156	0.000769718
ENSG00000167615	LENG8	114823	bisque4	0.0564562	0.751143	-0.127398	0.472759	-0.296803	0.0882763	0.229743	0.191186	0.267957	0.125479	-0.282117	0.105984	-0.723329	1.34576e-06	0.153888	0.384879	0.297336	0.0876794	0.435131	0.0101142	-0.794993	1.95771e-08	-0.235601	0.179803	-0.639626	4.64652e-05	0.169625	0.337531	0.940427	1.50709e-16	0.267778	0.125741	-0.671829	1.3583e-05	0.300295	0.0844211
ENSG00000067955	CBFB	865	bisque4	-0.0869563	0.624841	0.132322	0.455672	0.165404	0.349866	-0.108932	0.539713	-0.152412	0.389509	0.342428	0.0474359	0.563879	0.00051471	-0.294093	0.0913596	-0.126158	0.477114	-0.290968	0.0950178	0.598696	0.000183674	0.153121	0.38728	0.600079	0.000175874	-0.104346	0.557012	-0.817675	3.57313e-09	-0.0172175	0.923007	0.679608	9.86532e-06	-0.306104	0.0782966
ENSG00000204316	MRPL38	64978	bisque4	0.43792	0.00959009	0.0932594	0.599863	0.233512	0.183806	0.231417	0.187883	0.318661	0.0662382	-0.432012	0.0107288	-0.545066	0.000857964	0.275394	0.114933	0.233312	0.184191	0.17458	0.323396	-0.604147	0.000154617	-0.086021	0.628584	-0.468954	0.00514783	0.2538	0.14751	0.716604	1.87202e-06	-0.0723392	0.684329	-0.692024	5.80288e-06	0.211836	0.229088
ENSG00000263982	RP11-504I13.3	NA	bisque4	0.00821333	0.96323	-0.00481607	0.978434	-0.026635	0.88114	-0.139857	0.430178	-0.0311049	0.861371	-0.259831	0.137804	-0.153471	0.386185	0.45368	0.00704149	-0.214801	0.222485	0.0636003	0.720836	-0.235109	0.180739	0.0367365	0.836583	-0.459791	0.00622244	0.0655407	0.712675	0.454077	0.00698564	-0.278075	0.1113	-0.479388	0.00412218	0.370882	0.0308205
ENSG00000178852	EFCAB13	124989	bisque4	0.230925	0.18885	0.13536	0.445298	-0.00564507	0.974723	-0.101962	0.566107	0.258311	0.140205	-0.357414	0.0379665	-0.324248	0.061365	0.529327	0.00128646	-0.32723	0.0588822	0.25986	0.13776	-0.440666	0.0090968	-0.179255	0.310404	-0.749397	3.40226e-07	0.213079	0.226304	0.665119	1.77647e-05	-0.301541	0.0830777	-0.516912	0.00174706	0.531398	0.00122103
ENSG00000033050	ABCF2	10061	bisque4	-0.272045	0.119597	-0.172742	0.328595	0.350017	0.0424284	-0.342709	0.0472423	-0.636771	5.14702e-05	0.335353	0.0525203	0.794521	2.02371e-08	0.0779308	0.661327	0.0466374	0.79339	-0.811565	5.77707e-09	0.758491	2.02397e-07	0.258356	0.140133	0.745698	4.17654e-07	-0.0101407	0.954609	-0.780113	5.34925e-08	-0.396516	0.020251	0.175036	0.322113	-0.550202	0.000748486
ENSG00000136271	DDX56	54606	bisque4	0.112026	0.528189	-0.144578	0.414617	0.0320138	0.857361	-0.0546873	0.758705	0.0108893	0.951262	-0.16782	0.342773	-0.352523	0.0408718	0.474072	0.00462018	0.17313	0.327493	-0.00102021	0.995431	-0.524677	0.00144466	-0.309048	0.0753275	-0.497316	0.00276825	0.262636	0.133454	0.739243	5.92482e-07	-0.186105	0.291964	-0.838279	6.1399e-10	0.233926	0.183007
ENSG00000104907	TRMT1	55621	bisque4	0.354624	0.0396027	-0.00401338	0.982028	0.267296	0.126449	0.391373	0.0220865	0.304284	0.0801776	-0.486039	0.00356484	-0.548097	0.000791756	-0.0359909	0.839857	0.534613	0.00112526	0.0754479	0.671505	-0.476484	0.00438811	0.0626128	0.725002	-0.160406	0.364818	0.32852	0.0578326	0.551292	0.000726907	0.143853	0.416988	-0.526966	0.00136476	-0.175476	0.320879
ENSG00000088854	C20orf194	25943	bisque4	0.355091	0.0393251	0.104518	0.556358	-0.144317	0.41547	0.275453	0.114853	0.526656	0.00137535	-0.54724	0.000810006	-0.709834	2.58584e-06	0.218409	0.214626	-0.115405	0.515737	0.66624	1.69935e-05	-0.736721	6.77361e-07	-0.140509	0.42801	-0.801468	1.23178e-08	-0.0607771	0.732766	0.813778	4.86409e-09	0.0627409	0.724461	-0.419311	0.0135687	0.638976	4.75647e-05
ENSG00000132300	PTCD3	55037	bisque4	0.10571	0.551839	-0.113343	0.523319	-0.194229	0.271027	-0.16962	0.337547	0.216229	0.219351	-0.18209	0.302686	-0.439011	0.0093913	0.573642	0.000390042	-0.191733	0.277353	0.299416	0.0853793	-0.627588	7.10374e-05	-0.350352	0.0422177	-0.841876	4.40285e-10	0.0985316	0.579309	0.872095	1.85753e-11	-0.190328	0.280954	-0.693195	5.51207e-06	0.583249	0.000294327
ENSG00000134571	MYBPC3	4607	bisque4	0.0944006	0.595388	-0.145592	0.411318	-0.288652	0.0977998	0.0527949	0.76682	0.301927	0.082664	-0.152479	0.389297	-0.625479	7.63813e-05	0.332902	0.054379	0.0686086	0.699834	0.431154	0.0109033	-0.782295	4.63868e-08	-0.414627	0.0147642	-0.771495	9.24888e-08	0.118046	0.506111	0.929353	2.12765e-15	0.118254	0.505356	-0.662568	1.96384e-05	0.488669	0.00336325
ENSG00000185829	ARL17A	51326	bisque4	0.143045	0.419637	-0.130544	0.461804	-0.137047	0.439593	-0.0523525	0.768721	0.124577	0.482697	-0.191086	0.279007	-0.35112	0.0417378	0.470797	0.00495216	-0.146701	0.407726	0.303271	0.0812386	-0.550341	0.0007457	-0.235017	0.180914	-0.667369	1.62478e-05	-0.0910309	0.608645	0.689942	6.35439e-06	-0.196499	0.265357	-0.591009	0.000232946	0.575515	0.000369454
ENSG00000018280	SLC11A1	6556	bisque4	-0.103885	0.558764	-0.230144	0.190392	-0.572104	0.000407688	0.116733	0.510885	0.288808	0.0976105	-0.17682	0.317129	-0.65361	2.77237e-05	0.0547304	0.758521	0.0311373	0.861228	0.621427	8.76779e-05	-0.694169	5.28068e-06	-0.0802827	0.651741	-0.692478	5.68861e-06	-0.028392	0.87336	0.824725	2.00684e-09	0.348826	0.0431849	-0.310905	0.0735005	0.448028	0.00787922
ENSG00000136098	NEK3	4752	bisque4	-0.0784362	0.659263	-0.0453797	0.798846	-0.260545	0.136687	-0.303187	0.0813274	-0.0179612	0.919692	-0.0784585	0.659172	-0.206299	0.241772	0.459527	0.00625605	-0.397242	0.0200025	0.169724	0.337245	-0.276113	0.11395	-0.264349	0.130846	-0.655923	2.53894e-05	0.145575	0.411373	0.591803	0.000227359	-0.24306	0.166012	-0.406157	0.0171506	0.431086	0.0109173
ENSG00000229227	RP11-38L15.2	NA	bisque4	0.172481	0.32934	-0.221204	0.20867	-0.261878	0.134619	0.126262	0.476748	0.301548	0.0830701	-0.229773	0.191127	-0.615537	0.000106782	0.32092	0.0642318	0.0337947	0.849514	0.498321	0.00270544	-0.750572	3.18541e-07	-0.256355	0.14334	-0.738983	6.00754e-07	-0.086149	0.628071	0.84033	5.08438e-10	0.0561164	0.752593	-0.612358	0.000118573	0.54271	0.000912753
ENSG00000179886	TIGD5	84948	bisque4	0.108226	0.542359	0.0573154	0.747477	0.693377	5.46819e-06	-0.141849	0.423573	-0.446073	0.00818816	0.0490744	0.782845	0.655975	2.53399e-05	0.0672696	0.705429	0.155995	0.378324	-0.820258	2.90094e-09	0.675945	1.14817e-05	0.177762	0.314515	0.741818	5.15987e-07	0.121593	0.493324	-0.712987	2.22726e-06	-0.474662	0.00456251	0.0405666	0.819811	-0.577741	0.000346261
ENSG00000280347	AC000123.2	NA	bisque4	0.302276	0.0822928	0.089854	0.613305	-0.200815	0.25479	0.230031	0.190616	0.424279	0.0123906	-0.26527	0.129461	-0.666037	1.71309e-05	0.26515	0.12964	-0.0459697	0.796285	0.619811	9.25873e-05	-0.793624	2.15463e-08	-0.408333	0.0165089	-0.77979	5.46247e-08	-0.0568233	0.749576	0.822495	2.41517e-09	0.0805647	0.650596	-0.54103	0.000953658	0.701651	3.77599e-06
ENSG00000154258	ABCA9	10350	bisque4	0.0582927	0.743315	0.12976	0.464521	0.0110163	0.950695	-0.00377446	0.983098	0.0948336	0.593693	-0.440689	0.00909264	-0.256938	0.142401	0.279109	0.109921	-0.023026	0.897153	0.0709465	0.690103	-0.277902	0.111531	-0.239937	0.171691	-0.427339	0.0117088	0.241578	0.16869	0.508215	0.00215021	-0.173127	0.327503	-0.421879	0.0129485	0.104162	0.557712
ENSG00000113552	GNPDA1	10007	bisque4	-0.367707	0.0323971	0.0368155	0.836237	0.258057	0.140609	-0.421816	0.0129633	-0.625673	7.58746e-05	0.33107	0.0558024	0.843692	3.7109e-10	-0.0219286	0.902031	-0.0930464	0.600701	-0.805775	8.9657e-09	0.904015	2.38193e-13	0.311232	0.0731822	0.751542	3.01598e-07	0.118297	0.505202	-0.8435	3.77873e-10	-0.331342	0.0555891	0.360193	0.0363916	-0.620873	8.93337e-05
ENSG00000116237	ICMT	23463	bisque4	-0.0529002	0.766368	0.0291752	0.869896	0.541235	0.000948598	-0.33556	0.052365	-0.508257	0.00214805	0.213256	0.22591	0.796533	1.75609e-08	0.158657	0.370138	-0.0959324	0.589403	-0.785025	3.87234e-08	0.791333	2.52552e-08	0.297914	0.0870352	0.688794	6.67855e-06	0.0228177	0.898079	-0.805719	9.00326e-09	-0.553395	0.000686819	0.174832	0.322687	-0.393646	0.0212588
ENSG00000134900	TPP2	7174	bisque4	0.0667498	0.707604	-0.114411	0.519386	-0.445096	0.00834632	0.0688861	0.698676	0.388597	0.0231334	-0.176947	0.316777	-0.671901	1.35435e-05	0.278096	0.111271	-0.102812	0.562855	0.634671	5.54557e-05	-0.817935	3.49957e-09	-0.384251	0.0248541	-0.900213	4.3123e-13	0.0542397	0.760622	0.945527	3.73514e-17	0.178296	0.313042	-0.501894	0.00249201	0.641222	4.3863e-05
ENSG00000186354	C9orf47	286223	bisque4	0.0399294	0.822596	-0.137363	0.438528	-0.331806	0.055227	0.107529	0.544978	0.14066	0.42751	-0.124653	0.482426	-0.481489	0.00393853	0.242449	0.167112	0.0359704	0.839947	0.436329	0.00988616	-0.647913	3.43228e-05	-0.285014	0.102294	-0.613565	0.000113963	-0.110051	0.535532	0.686412	7.39922e-06	0.0950712	0.592764	-0.495691	0.00287254	0.504414	0.00235047
ENSG00000143224	PPOX	5498	bisque4	0.00199212	0.991079	0.085952	0.62886	0.0951398	0.592497	-0.16963	0.337516	-0.104666	0.555797	-0.398495	0.0195793	-0.118393	0.504853	0.349382	0.0428308	-0.0280115	0.875044	-0.207799	0.23829	-0.0612281	0.730856	-0.0205093	0.908344	-0.313525	0.0709803	0.514966	0.001831	0.42754	0.011665	-0.31307	0.0714133	-0.4878	0.00342872	-0.119337	0.501437
ENSG00000089248	ERP29	10961	bisque4	-0.0178457	0.920207	0.296596	0.0885089	0.2519	0.15067	0.143528	0.418052	-0.0136635	0.938866	0.0257372	0.885119	0.393389	0.0213512	-0.615185	0.000108031	0.0359529	0.840024	-0.241633	0.16859	0.678966	1.01328e-05	0.295391	0.0898726	0.752656	2.83171e-07	-0.0432195	0.80824	-0.841836	4.41954e-10	0.184663	0.295788	0.850538	1.90884e-10	-0.611555	0.000121728
ENSG00000168214	RBPJ	3516	bisque4	0.0954481	0.591292	-0.0827486	0.641749	-0.483774	0.00374683	0.23516	0.180641	0.487903	0.00342093	-0.270846	0.1213	-0.753035	2.77127e-07	0.00160394	0.992817	-0.00589095	0.973623	0.749332	3.41468e-07	-0.790127	2.74376e-08	-0.170365	0.335398	-0.779786	5.46406e-08	-0.00752701	0.966301	0.863172	5.11045e-11	0.379435	0.0268827	-0.266631	0.127432	0.524245	0.0014602
ENSG00000116096	SPR	6697	bisque4	0.123724	0.485723	0.31193	0.0725058	0.468448	0.00520271	0.220343	0.210494	0.0301669	0.865513	-0.126788	0.474896	0.288005	0.0985883	-0.36761	0.0324465	0.173207	0.327276	-0.289	0.097378	0.441012	0.00903618	0.163085	0.356756	0.617494	0.000100054	0.120595	0.496906	-0.607882	0.000137155	0.0306233	0.863497	0.42213	0.0128891	-0.474551	0.00457332
ENSG00000234420	ZNF37BP	100129482	bisque4	0.0513229	0.773149	-0.169557	0.337728	-0.260147	0.137309	-0.176384	0.318342	0.183628	0.298549	-0.108212	0.54241	-0.447317	0.00799047	0.587995	0.000255275	-0.174984	0.322261	0.318038	0.0667995	-0.652139	2.93083e-05	-0.369176	0.0316594	-0.852737	1.53108e-10	0.134298	0.448909	0.888766	2.25164e-12	-0.157563	0.373491	-0.727946	1.0669e-06	0.619374	9.3954e-05
[truncated: 13,526 more rows]
