# Supplementary material for: Characterization of Long Non-Coding RNAs in Systemic Sclerosis Monocytes: A Potential Role for PSMB8-AS1 in Altered Cytokine Secretion
Source: Int J Mol Sci. 2021 Apr 22;22(9):4365. doi: 10.3390/ijms22094365 (PMC8122435; doi:10.3390/ijms22094365)
Supplement: Supplementary file 1 [file ijms-22-04365-s001.zip › SupplementaryTable_3.xlsx]

## Sheet: Overlap_total
EnsembleID	IntraModularConnectivity_Definite	IntraModularConnectivity_Noncutaneous	GeneName	bioType	Module_Definite	Module_Noncutaneous
ENSG00000198821	16.0291	32.7442	CD247	processed_transcript	darkslateblue	cyan
ENSG00000113263	14.505	27.7285	ITK	protein_coding	darkslateblue	cyan
ENSG00000127152	14.4941	29.7121	BCL11B	protein_coding	darkslateblue	cyan
ENSG00000180644	13.8729	26.2941	PRF1	protein_coding	darkslateblue	cyan
ENSG00000153283	13.8554	29.0843	CD96	protein_coding	darkslateblue	cyan
ENSG00000111796	13.4078	19.7145	KLRB1	protein_coding	darkslateblue	cyan
ENSG00000182866	13.3812	32.4552	LCK	protein_coding	darkslateblue	cyan
ENSG00000107742	12.6882	32.436	SPOCK2	protein_coding	darkslateblue	cyan
ENSG00000163564	12.5455	27.5234	PYHIN1	protein_coding	darkslateblue	cyan
ENSG00000197540	12.2638	24.2355	GZMM	protein_coding	darkslateblue	cyan
ENSG00000100385	12.2232	29.3229	IL2RB	protein_coding	darkslateblue	cyan
ENSG00000211772	12.0704	31.1315	TRBC2	TR_C_gene	darkslateblue	cyan
ENSG00000115085	11.9808	34.6112	ZAP70	protein_coding	darkslateblue	cyan
ENSG00000034053	11.7055	11.5217	APBA2	protein_coding	darkslateblue	cyan
ENSG00000073861	11.5887	28.9695	TBX21	protein_coding	darkslateblue	cyan
ENSG00000134539	11.4475	24.8814	KLRD1	protein_coding	darkslateblue	cyan
ENSG00000198851	11.249	34.3831	CD3E	protein_coding	darkslateblue	cyan
ENSG00000167984	11.202	26.1981	NLRC3	protein_coding	darkslateblue	cyan
ENSG00000134954	10.9015	28.5308	ETS1	protein_coding	darkslateblue	cyan
ENSG00000168685	10.824	20.3712	IL7R	protein_coding	darkslateblue	cyan
ENSG00000124203	10.7799	20.7053	ZNF831	protein_coding	darkslateblue	cyan
ENSG00000115523	10.5369	16.595	GNLY	retained_intron	darkslateblue	cyan
ENSG00000277734	10.4638	28.3446	TRAC	TR_C_gene	darkslateblue	cyan
ENSG00000141293	10.2275	29.0713	SKAP1	protein_coding	darkslateblue	cyan
ENSG00000081059	10.0737	17.1235	TCF7	protein_coding	darkslateblue	cyan
ENSG00000013725	9.66004	23.8162	CD6	protein_coding	darkslateblue	cyan
ENSG00000172543	9.61323	24.3968	CTSW	protein_coding	darkslateblue	cyan
ENSG00000205336	9.33315	22.3748	GPR56	protein_coding	darkslateblue	cyan
ENSG00000099204	8.51524	18.0434	ABLIM1	protein_coding	darkslateblue	cyan
ENSG00000027869	7.99731	14.9245	SH2D2A	protein_coding	darkslateblue	cyan
ENSG00000159674	7.94651	10.0931	SPON2	protein_coding	darkslateblue	cyan
ENSG00000167286	7.4663	26.2305	CD3D	protein_coding	darkslateblue	cyan
ENSG00000181036	7.35683	19.8237	FCRL6	retained_intron	darkslateblue	cyan
ENSG00000067840	7.17651	20.7376	PDZD4	protein_coding	darkslateblue	cyan
ENSG00000069667	6.89115	30.2128	RORA	protein_coding	darkslateblue	cyan
ENSG00000152495	6.66522	19.2227	CAMK4	protein_coding	darkslateblue	cyan
ENSG00000125731	6.617	7.48038	SH2D3A	processed_transcript	darkslateblue	cyan
ENSG00000165929	6.52511	28.4753	TC2N	protein_coding	darkslateblue	cyan
ENSG00000162894	6.22235	15.446	FAIM3	protein_coding	darkslateblue	cyan
ENSG00000150687	6.13608	10.2965	PRSS23	protein_coding	darkslateblue	cyan
ENSG00000204475	5.92703	8.41121	NCR3	processed_transcript	darkslateblue	cyan
ENSG00000162892	5.45369	4.29695	IL24	protein_coding	darkslateblue	cyan
ENSG00000126353	5.25942	6.6866	CCR7	protein_coding	darkslateblue	cyan
ENSG00000008517	5.18957	26.985	IL32	protein_coding	darkslateblue	cyan
ENSG00000171476	5.13085	19.0644	HOPX	protein_coding	darkslateblue	cyan
ENSG00000172575	4.91464	24.7411	RASGRP1	protein_coding	darkslateblue	cyan
ENSG00000178562	4.88064	15.1875	CD28	protein_coding	darkslateblue	cyan
ENSG00000143515	4.6061	25.5136	ATP8B2	protein_coding	darkslateblue	cyan
ENSG00000069702	4.53368	16.7915	TGFBR3	nonsense_mediated_decay	darkslateblue	cyan
ENSG00000109452	4.3247	12.6383	INPP4B	protein_coding	darkslateblue	cyan
ENSG00000030419	4.19601	9.679	IKZF2	protein_coding	darkslateblue	cyan
ENSG00000074966	4.12123	6.57216	TXK	protein_coding	darkslateblue	cyan
ENSG00000138378	3.948	13.8352	STAT4	protein_coding	darkslateblue	cyan
ENSG00000172508	3.92593	3.76806	CARNS1	processed_transcript	darkslateblue	cyan
ENSG00000159753	3.77412	11.2843	RLTPR	protein_coding	darkslateblue	cyan
ENSG00000271503	3.58054	17.8779	CCL5	protein_coding	darkslateblue	cyan
ENSG00000137502	3.50963	9.59256	RAB30	protein_coding	darkslateblue	cyan
ENSG00000116824	3.4937	10.3962	CD2	protein_coding	darkslateblue	cyan
ENSG00000124243	3.42193	8.15727	BCAS4	protein_coding	darkslateblue	cyan
ENSG00000111674	3.30269	16.0532	ENO2	protein_coding	darkslateblue	cyan
ENSG00000065675	3.29156	23.9792	PRKCQ	protein_coding	darkslateblue	cyan
ENSG00000237943	2.72188	5.27548	PRKCQ-AS1	lincRNA	darkslateblue	cyan
ENSG00000186854	2.59559	8.65121	TRABD2A	protein_coding	darkslateblue	cyan
ENSG00000172116	2.43566	27.0538	CD8B	protein_coding	darkslateblue	cyan
ENSG00000007264	2.39237	19.3153	MATK	protein_coding	darkslateblue	cyan
ENSG00000007402	2.23817	2.2997	CACNA2D2	protein_coding	darkslateblue	cyan
ENSG00000185697	2.20184	20.7429	MYBL1	protein_coding	darkslateblue	cyan
ENSG00000165272	2.13249	8.07941	AQP3	protein_coding	darkslateblue	cyan
ENSG00000101096	2.02455	17.154	NFATC2	protein_coding	darkslateblue	cyan
ENSG00000153563	1.83111	30.7709	CD8A	protein_coding	darkslateblue	cyan
ENSG00000078596	1.7512	9.45888	ITM2A	protein_coding	darkslateblue	cyan
ENSG00000198780	1.60142	13.0562	FAM169A	nonsense_mediated_decay	darkslateblue	cyan
ENSG00000078589	1.46079	20.1727	P2RY10	processed_transcript	darkslateblue	cyan
ENSG00000110448	1.24955	18.0941	CD5	protein_coding	darkslateblue	cyan
ENSG00000091409	1.08854	11.798	ITGA6	protein_coding	darkslateblue	cyan
ENSG00000027075	0.900744	8.47024	PRKCH	protein_coding	darkslateblue	cyan
ENSG00000054654	0.801417	22.6376	SYNE2	protein_coding	darkslateblue	cyan
ENSG00000071575	0.594251	7.48423	TRIB2	protein_coding	darkslateblue	cyan
ENSG00000198286	3.71338	13.8424	CARD11	protein_coding	honeydew1	cyan
ENSG00000197635	2.49012	4.88545	DPP4	protein_coding	honeydew1	cyan
ENSG00000145247	2.31812	4.25418	OCIAD2	protein_coding	honeydew1	cyan
ENSG00000105926	1.93259	3.74446	MPP6	protein_coding	honeydew1	cyan
ENSG00000122224	1.86624	3.67594	LY9	protein_coding	honeydew1	cyan
ENSG00000111371	1.51826	16.3716	SLC38A1	protein_coding	honeydew1	cyan
ENSG00000105426	9.30007	20.9786	PTPRS	processed_transcript	honeydew1	paleturquoise
ENSG00000239961	8.61179	19.4637	LILRA4	protein_coding	honeydew1	paleturquoise
ENSG00000100453	8.43892	15.7789	GZMB	protein_coding	honeydew1	paleturquoise
ENSG00000106537	8.21781	14.6316	TSPAN13	protein_coding	honeydew1	paleturquoise
ENSG00000135916	8.10907	21.0519	ITM2C	protein_coding	honeydew1	paleturquoise
ENSG00000269404	7.84704	13.5253	SPIB	protein_coding	honeydew1	paleturquoise
ENSG00000235162	7.08953	16.7815	C12orf75	processed_transcript	honeydew1	paleturquoise
ENSG00000198794	6.9652	17.1488	SCAMP5	nonsense_mediated_decay	honeydew1	paleturquoise
ENSG00000082438	5.24621	11.2817	COBLL1	processed_transcript	honeydew1	paleturquoise
ENSG00000107317	5.17465	8.67721	PTGDS	protein_coding	honeydew1	paleturquoise
ENSG00000166963	4.90219	14.6063	MAP1A	protein_coding	honeydew1	paleturquoise
ENSG00000117632	4.26299	4.67662	STMN1	processed_transcript	honeydew1	paleturquoise
ENSG00000107719	4.18647	14.5833	PALD1	protein_coding	honeydew1	paleturquoise
ENSG00000090530	4.12889	7.3622	LEPREL1	protein_coding	honeydew1	paleturquoise
ENSG00000167483	3.85713	17.4235	FAM129C	protein_coding	honeydew1	paleturquoise
ENSG00000111249	3.77251	17.2492	CUX2	protein_coding	honeydew1	paleturquoise
ENSG00000112655	3.66844	14.702	PTK7	protein_coding	honeydew1	paleturquoise
ENSG00000072858	3.63073	1.61191	SIDT1	protein_coding	honeydew1	paleturquoise
ENSG00000155367	3.1059	13.7401	PPM1J	nonsense_mediated_decay	honeydew1	paleturquoise
ENSG00000103056	3.08477	12.9427	SMPD3	protein_coding	honeydew1	paleturquoise
ENSG00000198178	2.95834	14.3519	CLEC4C	protein_coding	honeydew1	paleturquoise
ENSG00000166428	2.83672	4.40887	PLD4	protein_coding	honeydew1	paleturquoise
ENSG00000062524	2.70012	17.7442	LTK	protein_coding	honeydew1	paleturquoise
ENSG00000154928	2.29459	14.691	EPHB1	processed_transcript	honeydew1	paleturquoise
ENSG00000136425	2.02636	3.54236	CIB2	protein_coding	honeydew1	paleturquoise
ENSG00000185436	1.68669	7.74743	IFNLR1	protein_coding	honeydew1	paleturquoise
ENSG00000165617	1.55762	0.179806	DACT1	processed_transcript	honeydew1	paleturquoise
ENSG00000137265	1.43026	8.3089	IRF4	protein_coding	honeydew1	paleturquoise
ENSG00000130300	1.38526	2.26168	PLVAP	protein_coding	honeydew1	paleturquoise
ENSG00000112294	1.26824	6.47559	ALDH5A1	protein_coding	honeydew1	paleturquoise
ENSG00000121570	1.22332	9.27142	DPPA4	protein_coding	honeydew1	paleturquoise
ENSG00000159618	0.951148	5.9253	GPR114	protein_coding	honeydew1	paleturquoise
ENSG00000132465	0.425998	6.23421	IGJ	protein_coding	honeydew1	paleturquoise
ENSG00000132386	0.321789	11.4609	SERPINF1	protein_coding	honeydew1	paleturquoise
ENSG00000158691	11.5825	3.41517	ZSCAN12	protein_coding	brown4	darkorange
ENSG00000100335	10.8002	3.78159	MIEF1	processed_transcript	brown4	darkorange
ENSG00000170385	10.6946	3.33465	SLC30A1	protein_coding	brown4	darkorange
ENSG00000156735	9.21525	6.25407	BAG4	processed_transcript	brown4	darkorange
ENSG00000011007	8.53395	2.8041	TCEB3	protein_coding	brown4	darkorange
ENSG00000125484	7.83033	3.33579	GTF3C4	protein_coding	brown4	darkorange
ENSG00000081721	7.21507	4.74499	DUSP12	nonsense_mediated_decay	brown4	darkorange
ENSG00000172409	7.05694	2.50355	CLP1	protein_coding	brown4	darkorange
ENSG00000171150	5.86167	2.73471	SOCS5	protein_coding	brown4	darkorange
ENSG00000151458	5.63632	1.45376	ANKRD50	protein_coding	brown4	darkorange
ENSG00000165410	5.30307	1.65494	CFL2	protein_coding	brown4	darkorange
ENSG00000259623	4.67384	3.98555	RP11-156E6.1	sense_overlapping	brown4	darkorange
ENSG00000185798	4.18123	4.46858	WDR53	protein_coding	brown4	darkorange
ENSG00000214367	3.40215	2.22847	HAUS3	protein_coding	brown4	darkorange
ENSG00000117751	2.89779	6.07126	PPP1R8	protein_coding	brown4	darkorange
ENSG00000133193	1.01809	5.83372	FAM104A	protein_coding	brown4	darkorange
ENSG00000166860	9.69664	14.0376	ZBTB39	protein_coding	brown4	floralwhite
ENSG00000127334	7.39949	8.94731	DYRK2	protein_coding	brown4	floralwhite
ENSG00000183475	5.7943	9.98529	ASB7	protein_coding	brown4	floralwhite
ENSG00000102870	4.61026	3.76088	ZNF629	protein_coding	brown4	floralwhite
ENSG00000174151	4.32341	2.90874	CYB561D1	protein_coding	brown4	floralwhite
ENSG00000185298	4.01782	4.54303	CCDC137	protein_coding	brown4	floralwhite
ENSG00000171649	3.41764	1.62941	ZIK1	processed_transcript	brown4	floralwhite
ENSG00000177125	2.37822	11.0573	ZBTB34	protein_coding	brown4	floralwhite
ENSG00000162377	8.09598	9.37404	COA7	protein_coding	brown4	darkturquoise
ENSG00000151332	5.06349	9.20991	MBIP	protein_coding	brown4	darkturquoise
ENSG00000172315	4.27264	1.43144	TP53RK	protein_coding	brown4	darkturquoise
ENSG00000037637	4.14495	1.04195	FBXO42	protein_coding	brown4	darkturquoise
ENSG00000144231	3.78998	13.0946	POLR2D	protein_coding	brown4	darkturquoise
ENSG00000197579	2.89464	2.33185	TOPORS	protein_coding	brown4	darkturquoise
ENSG00000119950	2.40102	9.65646	MXI1	protein_coding	brown4	darkturquoise
ENSG00000244482	1.90869	1.40456	LILRA6	nonsense_mediated_decay	brown4	darkturquoise
ENSG00000198205	1.49694	1.89974	ZXDA	protein_coding	brown4	darkturquoise
ENSG00000214022	12.9036	18.7941	REPIN1	protein_coding	darkturquoise	saddlebrown
ENSG00000105516	11.3844	8.71615	DBP	protein_coding	darkturquoise	saddlebrown
ENSG00000088356	10.5513	3.82009	PDRG1	protein_coding	darkturquoise	saddlebrown
ENSG00000179041	9.70305	11.4268	RRS1	protein_coding	darkturquoise	saddlebrown
ENSG00000073536	8.55244	17.0718	NLE1	protein_coding	darkturquoise	saddlebrown
ENSG00000185112	7.84007	3.53047	FAM43A	protein_coding	darkturquoise	saddlebrown
ENSG00000166188	7.11907	10.2139	ZNF319	protein_coding	darkturquoise	saddlebrown
ENSG00000176371	6.88728	5.74942	ZSCAN2	protein_coding	darkturquoise	saddlebrown
ENSG00000163162	5.22696	16.4452	RNF149	processed_transcript	darkturquoise	saddlebrown
ENSG00000006576	5.17726	14.496	PHTF2	protein_coding	darkturquoise	saddlebrown
ENSG00000256269	4.61227	8.33015	HMBS	processed_transcript	darkturquoise	saddlebrown
ENSG00000153391	4.35377	20.4987	INO80C	protein_coding	darkturquoise	saddlebrown
ENSG00000137462	4.11635	14.4763	TLR2	protein_coding	darkturquoise	saddlebrown
ENSG00000173744	3.54729	27.153	AGFG1	protein_coding	darkturquoise	saddlebrown
ENSG00000177732	3.07072	1.39982	SOX12	protein_coding	darkturquoise	saddlebrown
ENSG00000161791	2.45315	7.86467	FMNL3	protein_coding	darkturquoise	saddlebrown
ENSG00000255080	1.82437	12.5202	RP11-1082L8.3	lincRNA	darkturquoise	saddlebrown
ENSG00000100321	1.68309	2.00336	SYNGR1	protein_coding	darkturquoise	saddlebrown
ENSG00000152804	16.7735	8.67301	HHEX	protein_coding	darkturquoise	darkorange
ENSG00000167447	12.8274	2.17121	SMG8	protein_coding	darkturquoise	darkorange
ENSG00000178307	11.1195	3.2688	TMEM11	protein_coding	darkturquoise	darkorange
ENSG00000265972	10.357	4.1893	TXNIP	protein_coding	darkturquoise	darkorange
ENSG00000142444	10.3245	4.7647	C19orf52	protein_coding	darkturquoise	darkorange
ENSG00000164284	9.68312	3.52773	GRPEL2	protein_coding	darkturquoise	darkorange
ENSG00000132825	8.70007	1.20367	PPP1R3D	protein_coding	darkturquoise	darkorange
ENSG00000213186	8.1312	0.513716	TRIM59	protein_coding	darkturquoise	darkorange
ENSG00000213859	7.87547	0.739743	KCTD11	processed_transcript	darkturquoise	darkorange
ENSG00000112996	7.32564	4.17172	MRPS30	protein_coding	darkturquoise	darkorange
ENSG00000178935	7.1271	2.95902	ZNF552	protein_coding	darkturquoise	darkorange
ENSG00000189369	7.07376	1.26497	GSPT2	protein_coding	darkturquoise	darkorange
ENSG00000164902	6.36664	4.20458	PHAX	protein_coding	darkturquoise	darkorange
ENSG00000101138	6.14379	1.03977	CSTF1	retained_intron	darkturquoise	darkorange
ENSG00000278869	5.37481	0.982411	CITF22-49E9.3	lincRNA	darkturquoise	darkorange
ENSG00000196466	3.49207	2.07673	ZNF799	retained_intron	darkturquoise	darkorange
ENSG00000187189	2.7478	0.585441	TSPYL4	protein_coding	darkturquoise	darkorange
ENSG00000093167	2.38208	0.460529	LRRFIP2	protein_coding	darkturquoise	darkorange
ENSG00000138231	2.29827	2.35152	DBR1	protein_coding	darkturquoise	darkorange
ENSG00000122687	18.1655	5.71289	FTSJ2	processed_transcript	darkturquoise	floralwhite
ENSG00000104221	14.9449	1.51437	BRF2	protein_coding	darkturquoise	floralwhite
ENSG00000123297	10.5433	9.29897	TSFM	protein_coding	darkturquoise	floralwhite
ENSG00000175087	9.78723	11.6945	PDIK1L	protein_coding	darkturquoise	floralwhite
ENSG00000134830	9.43872	6.07202	C5AR2	protein_coding	darkturquoise	floralwhite
ENSG00000141570	9.02171	11.7601	CBX8	protein_coding	darkturquoise	floralwhite
ENSG00000278600	7.49078	3.23085	RP11-81A1.6	sense_intronic	darkturquoise	floralwhite
ENSG00000197024	5.30876	10.4529	ZNF398	protein_coding	darkturquoise	floralwhite
ENSG00000163481	5.14766	15.5086	RNF25	protein_coding	darkturquoise	floralwhite
ENSG00000198551	4.98129	0.130996	ZNF627	processed_transcript	darkturquoise	floralwhite
ENSG00000188707	4.67561	11.9601	ZBED6CL	protein_coding	darkturquoise	floralwhite
ENSG00000187147	4.31612	4.4049	RNF220	protein_coding	darkturquoise	floralwhite
ENSG00000177311	4.29271	2.13743	ZBTB38	protein_coding	darkturquoise	floralwhite
ENSG00000123178	4.26486	5.13879	SPRYD7	protein_coding	darkturquoise	floralwhite
ENSG00000276900	3.93434	3.07816	RP11-467L13.7	antisense	darkturquoise	floralwhite
ENSG00000088812	3.2081	2.66912	ATRN	protein_coding	darkturquoise	floralwhite
ENSG00000003147	1.73404	0.240945	ICA1	protein_coding	darkturquoise	floralwhite
ENSG00000103512	0.899921	0.464133	NOMO1	protein_coding	darkturquoise	floralwhite
ENSG00000083817	4.73627	0.423659	ZNF416	protein_coding	darkturquoise	plum1
ENSG00000231770	3.53077	0.430002	TMEM44-AS1	antisense	darkturquoise	plum1
ENSG00000173214	3.50273	0.832461	KIAA1919	protein_coding	darkturquoise	plum1
ENSG00000185614	2.70611	0.22765	FAM212A	protein_coding	darkturquoise	plum1
ENSG00000267475	2.43475	0.552098	CTD-2538C1.2	lincRNA	darkturquoise	plum1
ENSG00000162889	31.061	105.949	MAPKAPK2	protein_coding	violet	darkolivegreen
ENSG00000122122	29.7805	30.2709	SASH3	processed_transcript	violet	darkolivegreen
ENSG00000178951	28.4889	90.2083	ZBTB7A	protein_coding	violet	darkolivegreen
ENSG00000129534	28.4851	41.3899	MIS18BP1	protein_coding	violet	darkolivegreen
ENSG00000156860	28.4609	118.135	FBRS	protein_coding	violet	darkolivegreen
ENSG00000139722	27.4769	87.5217	VPS37B	protein_coding	violet	darkolivegreen
ENSG00000173039	27.4506	130.147	RELA	protein_coding	violet	darkolivegreen
ENSG00000116786	27.0814	147.648	PLEKHM2	protein_coding	violet	darkolivegreen
ENSG00000138399	26.0898	82.5501	FASTKD1	protein_coding	violet	darkolivegreen
ENSG00000131408	25.6217	127.035	NR1H2	protein_coding	violet	darkolivegreen
ENSG00000170854	24.4014	78.4944	MINA	protein_coding	violet	darkolivegreen
ENSG00000141522	24.329	89.2554	ARHGDIA	processed_transcript	violet	darkolivegreen
ENSG00000100036	23.4354	33.3832	SLC35E4	protein_coding	violet	darkolivegreen
ENSG00000104856	22.3994	76.1981	RELB	protein_coding	violet	darkolivegreen
ENSG00000139517	22.0001	14.2178	LNX2	protein_coding	violet	darkolivegreen
ENSG00000125629	21.6462	105.079	INSIG2	nonsense_mediated_decay	violet	darkolivegreen
ENSG00000188229	21.5684	76.3401	TUBB4B	protein_coding	violet	darkolivegreen
ENSG00000079313	21.5148	145.216	REXO1	protein_coding	violet	darkolivegreen
ENSG00000100284	20.3643	159.493	TOM1	protein_coding	violet	darkolivegreen
ENSG00000160999	19.8977	38.5714	SH2B2	nonsense_mediated_decay	violet	darkolivegreen
ENSG00000104885	19.513	127.78	DOT1L	protein_coding	violet	darkolivegreen
ENSG00000166801	18.5579	43.6636	FAM111A	protein_coding	violet	darkolivegreen
ENSG00000186017	17.8164	14.4497	ZNF566	protein_coding	violet	darkolivegreen
ENSG00000127452	17.4538	59.5726	FBXL12	protein_coding	violet	darkolivegreen
ENSG00000176170	16.5007	55.1457	SPHK1	protein_coding	violet	darkolivegreen
ENSG00000254470	16.2756	18.757	AP5B1	protein_coding	violet	darkolivegreen
ENSG00000138942	16.2288	30.3624	RNF185	retained_intron	violet	darkolivegreen
ENSG00000225190	15.9339	72.6532	PLEKHM1	protein_coding	violet	darkolivegreen
ENSG00000136877	15.8861	108.323	FPGS	processed_transcript	violet	darkolivegreen
ENSG00000088451	14.9087	78.0316	TGDS	protein_coding	violet	darkolivegreen
ENSG00000148719	14.4387	127.355	DNAJB12	protein_coding	violet	darkolivegreen
ENSG00000165416	14.205	108.627	SUGT1	processed_transcript	violet	darkolivegreen
ENSG00000196923	14.136	60.9386	PDLIM7	nonsense_mediated_decay	violet	darkolivegreen
ENSG00000213722	12.9373	69.4242	DDAH2	protein_coding	violet	darkolivegreen
ENSG00000183484	12.8795	74.8983	GPR132	protein_coding	violet	darkolivegreen
ENSG00000163104	12.5755	27.6055	SMARCAD1	protein_coding	violet	darkolivegreen
ENSG00000175595	12.0602	52.9632	ERCC4	protein_coding	violet	darkolivegreen
ENSG00000114867	12.0141	54.7759	EIF4G1	protein_coding	violet	darkolivegreen
ENSG00000178789	11.6257	9.59254	CD300LB	protein_coding	violet	darkolivegreen
ENSG00000101695	11.6221	88.0691	RNF125	protein_coding	violet	darkolivegreen
ENSG00000073150	11.5621	26.6868	PANX2	protein_coding	violet	darkolivegreen
ENSG00000198420	11.52	105.457	FAM115A	protein_coding	violet	darkolivegreen
ENSG00000145332	11.4708	67.6684	KLHL8	protein_coding	violet	darkolivegreen
ENSG00000115841	11.4068	66.5633	RMDN2	protein_coding	violet	darkolivegreen
ENSG00000163002	11.2757	15.0473	NUP35	protein_coding	violet	darkolivegreen
ENSG00000176055	10.5887	123.022	MBLAC2	protein_coding	violet	darkolivegreen
ENSG00000001630	10.2551	16.765	CYP51A1	protein_coding	violet	darkolivegreen
ENSG00000132570	9.79572	66.5055	PCBD2	protein_coding	violet	darkolivegreen
ENSG00000197122	9.41521	24.9072	SRC	processed_transcript	violet	darkolivegreen
ENSG00000104549	8.85207	35.4178	SQLE	protein_coding	violet	darkolivegreen
ENSG00000133641	8.81304	13.1533	C12orf29	processed_transcript	violet	darkolivegreen
ENSG00000137824	8.64452	2.92332	RMDN3	protein_coding	violet	darkolivegreen
ENSG00000160691	8.48557	110.234	SHC1	protein_coding	violet	darkolivegreen
ENSG00000272016	8.41861	19.5349	RP11-215G15.5	lincRNA	violet	darkolivegreen
ENSG00000100083	8.35341	93.3008	GGA1	protein_coding	violet	darkolivegreen
ENSG00000170653	7.8374	55.1406	ATF7	protein_coding	violet	darkolivegreen
ENSG00000108055	7.13048	24.2222	SMC3	protein_coding	violet	darkolivegreen
ENSG00000107263	6.62802	42.8257	RAPGEF1	protein_coding	violet	darkolivegreen
ENSG00000143971	6.62089	64.5888	ETAA1	protein_coding	violet	darkolivegreen
ENSG00000149573	6.36033	7.70666	MPZL2	protein_coding	violet	darkolivegreen
ENSG00000178105	6.28324	42.1556	DDX10	protein_coding	violet	darkolivegreen
ENSG00000130202	5.27921	5.87557	PVRL2	protein_coding	violet	darkolivegreen
ENSG00000120837	5.06189	25.2583	NFYB	protein_coding	violet	darkolivegreen
ENSG00000023516	5.00743	65.6742	AKAP11	protein_coding	violet	darkolivegreen
ENSG00000101752	4.91693	36.5074	MIB1	processed_transcript	violet	darkolivegreen
ENSG00000186448	4.10007	23.2927	ZNF197	protein_coding	violet	darkolivegreen
ENSG00000182175	3.98354	1.10792	RGMA	protein_coding	violet	darkolivegreen
ENSG00000256594	3.97501	2.47568	RP11-705C15.2	processed_transcript	violet	darkolivegreen
ENSG00000103351	3.74237	10.7239	CLUAP1	protein_coding	violet	darkolivegreen
ENSG00000271888	3.30027	1.96548	RP11-560J1.2	lincRNA	violet	darkolivegreen
ENSG00000271270	2.43057	10.2056	TMCC1-AS1	antisense	violet	darkolivegreen
ENSG00000166788	2.31661	17.2703	SAAL1	processed_transcript	violet	darkolivegreen
ENSG00000151779	1.90734	5.02365	NBAS	protein_coding	violet	darkolivegreen
ENSG00000166938	1.62275	31.9889	DIS3L	protein_coding	violet	darkolivegreen
ENSG00000140406	30.5089	12.886	MESDC1	protein_coding	violet	pink
ENSG00000253276	26.1256	3.24327	CCDC71L	protein_coding	violet	pink
ENSG00000112658	24.7376	9.52648	SRF	protein_coding	violet	pink
ENSG00000167996	19.3134	12.1292	FTH1	protein_coding	violet	pink
ENSG00000259863	15.2025	1.29327	SH3RF3-AS1	lincRNA	violet	pink
ENSG00000167470	13.9691	5.56527	MIDN	protein_coding	violet	pink
ENSG00000117298	13.3329	0.738216	ECE1	protein_coding	violet	pink
ENSG00000129911	11.5205	9.90185	KLF16	nonsense_mediated_decay	violet	pink
ENSG00000104447	11.3244	2.94408	TRPS1	protein_coding	violet	pink
ENSG00000172780	11.2292	11.4837	RAB43	protein_coding	violet	pink
ENSG00000121957	10.9676	1.51741	GPSM2	protein_coding	violet	pink
ENSG00000273604	10.699	1.92826	C17orf96	protein_coding	violet	pink
ENSG00000271303	10.6239	1.65726	SRXN1	protein_coding	violet	pink
ENSG00000148344	10.5898	1.27096	PTGES	processed_transcript	violet	pink
ENSG00000184602	6.94809	3.88225	SNN	protein_coding	violet	pink
ENSG00000131242	6.14405	3.34258	RAB11FIP4	protein_coding	violet	pink
ENSG00000101460	2.78953	3.4225	MAP1LC3A	protein_coding	violet	pink
ENSG00000184371	28.6654	10.4555	CSF1	protein_coding	violet	brown4
ENSG00000136997	15.7637	1.77012	MYC	protein_coding	violet	brown4
ENSG00000127666	11.1104	10.375	TICAM1	protein_coding	violet	brown4
ENSG00000099860	7.64269	1.32432	GADD45B	retained_intron	violet	brown4
ENSG00000196865	7.18778	4.12537	NHLRC2	protein_coding	violet	brown4
ENSG00000170468	5.73364	2.25384	C14orf169	protein_coding	violet	brown4
ENSG00000137496	5.66725	8.93196	IL18BP	protein_coding	violet	brown4
ENSG00000167384	5.03968	8.80398	ZNF180	protein_coding	violet	brown4
ENSG00000104825	27.6906	7.68159	NFKBIB	protein_coding	violet	yellowgreen
ENSG00000131669	26.7224	11.7606	NINJ1	protein_coding	violet	yellowgreen
ENSG00000110047	23.7127	9.25378	EHD1	protein_coding	violet	yellowgreen
ENSG00000181649	14.579	8.26741	PHLDA2	protein_coding	violet	yellowgreen
ENSG00000183513	13.5651	4.65346	COA5	protein_coding	violet	yellowgreen
ENSG00000116514	8.01383	5.67645	RNF19B	protein_coding	violet	yellowgreen
ENSG00000112787	25.0183	63.5463	FBRSL1	protein_coding	lightgreen	darkolivegreen
ENSG00000100241	19.4303	35.9109	SBF1	protein_coding	lightgreen	darkolivegreen
ENSG00000172534	19.3666	85.4598	HCFC1	protein_coding	lightgreen	darkolivegreen
ENSG00000079432	18.4421	159.129	CIC	protein_coding	lightgreen	darkolivegreen
ENSG00000162298	18.1207	112.225	SYVN1	retained_intron	lightgreen	darkolivegreen
ENSG00000160741	17.6416	52.5701	CRTC2	nonsense_mediated_decay	lightgreen	darkolivegreen
ENSG00000184922	16.7893	111.813	FMNL1	processed_transcript	lightgreen	darkolivegreen
ENSG00000076924	16.4645	121.143	XAB2	protein_coding	lightgreen	darkolivegreen
ENSG00000196498	13.8852	32.2923	NCOR2	protein_coding	lightgreen	darkolivegreen
ENSG00000123124	13.2578	53.7428	WWP1	protein_coding	lightgreen	darkolivegreen
ENSG00000131759	13.0346	85.6006	RARA	protein_coding	lightgreen	darkolivegreen
ENSG00000178209	12.3831	65.3537	PLEC	protein_coding	lightgreen	darkolivegreen
ENSG00000151292	12.2868	20.9232	CSNK1G3	processed_transcript	lightgreen	darkolivegreen
ENSG00000197136	11.1225	85.0348	PCNXL3	protein_coding	lightgreen	darkolivegreen
ENSG00000169710	11.12	27.7858	FASN	protein_coding	lightgreen	darkolivegreen
ENSG00000139725	10.9765	22.2602	RHOF	protein_coding	lightgreen	darkolivegreen
ENSG00000078061	10.9159	135.143	ARAF	protein_coding	lightgreen	darkolivegreen
ENSG00000109736	10.9109	59.2665	MFSD10	protein_coding	lightgreen	darkolivegreen
ENSG00000262246	10.7372	55.3152	CORO7	protein_coding	lightgreen	darkolivegreen
ENSG00000102858	10.6783	42.5838	MGRN1	protein_coding	lightgreen	darkolivegreen
ENSG00000137871	10.2561	83.5812	ZNF280D	nonsense_mediated_decay	lightgreen	darkolivegreen
ENSG00000132361	9.68562	9.72995	CLUH	protein_coding	lightgreen	darkolivegreen
ENSG00000072310	9.58857	44.2819	SREBF1	nonsense_mediated_decay	lightgreen	darkolivegreen
ENSG00000101152	8.87887	88.8414	DNAJC5	protein_coding	lightgreen	darkolivegreen
ENSG00000163848	8.55751	54.9963	ZNF148	protein_coding	lightgreen	darkolivegreen
ENSG00000089639	8.45827	21.6731	GMIP	protein_coding	lightgreen	darkolivegreen
ENSG00000090020	8.3086	10.0829	SLC9A1	retained_intron	lightgreen	darkolivegreen
ENSG00000161202	8.26994	20.0487	DVL3	protein_coding	lightgreen	darkolivegreen
ENSG00000141867	8.26711	163.037	BRD4	protein_coding	lightgreen	darkolivegreen
ENSG00000198792	8.09661	72.5417	TMEM184B	protein_coding	lightgreen	darkolivegreen
ENSG00000168944	8.00758	76.5337	CEP120	protein_coding	lightgreen	darkolivegreen
ENSG00000105135	7.89606	63.2244	ILVBL	retained_intron	lightgreen	darkolivegreen
ENSG00000132964	7.55151	50.0275	CDK8	protein_coding	lightgreen	darkolivegreen
ENSG00000126858	7.49605	6.36385	RHOT1	protein_coding	lightgreen	darkolivegreen
ENSG00000072786	7.18875	61.5461	STK10	protein_coding	lightgreen	darkolivegreen
ENSG00000054282	6.70638	21.6278	SDCCAG8	processed_transcript	lightgreen	darkolivegreen
ENSG00000181222	6.68469	81.1396	POLR2A	protein_coding	lightgreen	darkolivegreen
ENSG00000169288	6.4526	53.101	MRPL1	protein_coding	lightgreen	darkolivegreen
ENSG00000174177	5.86436	8.80473	CTU2	protein_coding	lightgreen	darkolivegreen
ENSG00000014164	5.78972	13.8658	ZC3H3	protein_coding	lightgreen	darkolivegreen
ENSG00000115808	5.78221	36.2324	STRN	protein_coding	lightgreen	darkolivegreen
ENSG00000187815	5.58247	21.8085	ZFP69	protein_coding	lightgreen	darkolivegreen
ENSG00000182923	5.13254	15.9821	CEP63	protein_coding	lightgreen	darkolivegreen
ENSG00000135723	4.81203	9.16865	FHOD1	retained_intron	lightgreen	darkolivegreen
ENSG00000160785	4.78296	60.0844	SLC25A44	protein_coding	lightgreen	darkolivegreen
ENSG00000074660	4.66272	5.4655	SCARF1	protein_coding	lightgreen	darkolivegreen
ENSG00000125843	4.57832	29.1848	AP5S1	protein_coding	lightgreen	darkolivegreen
ENSG00000129933	4.23909	42.4117	MAU2	protein_coding	lightgreen	darkolivegreen
ENSG00000187764	4.23714	7.6377	SEMA4D	protein_coding	lightgreen	darkolivegreen
ENSG00000106443	4.19499	24.2187	PHF14	nonsense_mediated_decay	lightgreen	darkolivegreen
ENSG00000169131	3.67923	40.988	ZNF354A	protein_coding	lightgreen	darkolivegreen
ENSG00000151422	3.5571	34.1696	FER	protein_coding	lightgreen	darkolivegreen
ENSG00000136286	3.53081	42.5567	MYO1G	nonsense_mediated_decay	lightgreen	darkolivegreen
ENSG00000086200	3.25072	53.1922	IPO11	protein_coding	lightgreen	darkolivegreen
ENSG00000102226	2.63245	36.5536	USP11	protein_coding	lightgreen	darkolivegreen
ENSG00000137073	2.37668	9.01431	UBAP2	protein_coding	lightgreen	darkolivegreen
ENSG00000180155	1.68434	1.5939	LYNX1	protein_coding	lightgreen	darkolivegreen
ENSG00000177666	21.1781	17.696	PNPLA2	protein_coding	lightgreen	darkred
ENSG00000090372	19.9462	16.8756	STRN4	protein_coding	lightgreen	darkred
ENSG00000164880	19.4657	15.4852	INTS1	protein_coding	lightgreen	darkred
ENSG00000011451	18.7189	11.679	WIZ	protein_coding	lightgreen	darkred
ENSG00000133250	18.271	13.8648	ZNF414	protein_coding	lightgreen	darkred
ENSG00000204673	17.9319	17.9069	AKT1S1	protein_coding	lightgreen	darkred
ENSG00000173020	17.2097	21.0637	ADRBK1	protein_coding	lightgreen	darkred
ENSG00000142002	15.4065	14.348	DPP9	protein_coding	lightgreen	darkred
ENSG00000130758	15.1321	9.89684	MAP3K10	protein_coding	lightgreen	darkred
ENSG00000129968	15.1259	23.9774	ABHD17A	protein_coding	lightgreen	darkred
ENSG00000085872	14.4657	8.86873	CHERP	protein_coding	lightgreen	darkred
ENSG00000125912	13.5384	9.84325	NCLN	protein_coding	lightgreen	darkred
ENSG00000169718	13.5186	19.2243	DUS1L	protein_coding	lightgreen	darkred
ENSG00000178691	13.1487	7.86365	SUZ12	protein_coding	lightgreen	darkred
ENSG00000153443	13.066	16.1157	UBALD1	protein_coding	lightgreen	darkred
ENSG00000104205	12.7366	8.21344	SGK3	protein_coding	lightgreen	darkred
ENSG00000105556	12.5875	8.12369	MIER2	protein_coding	lightgreen	darkred
ENSG00000141905	11.2796	4.36921	NFIC	protein_coding	lightgreen	darkred
ENSG00000197483	10.5541	10.8855	ZNF628	protein_coding	lightgreen	darkred
ENSG00000133275	10.249	27.0248	CSNK1G2	protein_coding	lightgreen	darkred
ENSG00000134030	9.98284	7.74526	CTIF	protein_coding	lightgreen	darkred
ENSG00000105738	9.88895	10.5585	SIPA1L3	protein_coding	lightgreen	darkred
ENSG00000160209	9.7594	7.98338	PDXK	protein_coding	lightgreen	darkred
ENSG00000081870	9.42485	1.92145	HSPB11	protein_coding	lightgreen	darkred
ENSG00000125375	8.75659	3.75259	ATP5S	processed_transcript	lightgreen	darkred
ENSG00000257704	7.95961	14.7587	INAFM1	protein_coding	lightgreen	darkred
ENSG00000148411	7.7632	13.3012	NACC2	protein_coding	lightgreen	darkred
ENSG00000177051	7.7025	4.03079	FBXO46	protein_coding	lightgreen	darkred
ENSG00000145725	7.25705	8.49892	PPIP5K2	protein_coding	lightgreen	darkred
ENSG00000127054	6.92143	19.2906	CPSF3L	retained_intron	lightgreen	darkred
ENSG00000070614	6.21682	3.30096	NDST1	protein_coding	lightgreen	darkred
ENSG00000185000	6.13348	14.2725	DGAT1	protein_coding	lightgreen	darkred
ENSG00000198925	5.91397	4.81122	ATG9A	nonsense_mediated_decay	lightgreen	darkred
ENSG00000140320	5.89187	2.06551	BAHD1	protein_coding	lightgreen	darkred
ENSG00000124313	5.74907	3.85838	IQSEC2	protein_coding	lightgreen	darkred
ENSG00000090565	5.62419	6.16967	RAB11FIP3	protein_coding	lightgreen	darkred
ENSG00000108557	4.63818	5.9432	RAI1	protein_coding	lightgreen	darkred
ENSG00000004399	4.6004	3.80198	PLXND1	protein_coding	lightgreen	darkred
ENSG00000171813	4.58652	6.48053	PWWP2B	protein_coding	lightgreen	darkred
ENSG00000100034	3.85919	1.46818	PPM1F	protein_coding	lightgreen	darkred
ENSG00000165802	3.72907	2.138	NSMF	protein_coding	lightgreen	darkred
ENSG00000148688	2.99307	4.65435	RPP30	protein_coding	lightgreen	darkred
ENSG00000182318	2.95572	1.53556	ZSCAN22	protein_coding	lightgreen	darkred
ENSG00000167291	2.23229	0.317687	TBC1D16	protein_coding	lightgreen	darkred
ENSG00000185800	2.1421	0.980448	DMWD	protein_coding	lightgreen	darkred
ENSG00000107954	1.94461	2.03744	NEURL1	protein_coding	lightgreen	darkred
ENSG00000149182	1.91763	3.62479	ARFGAP2	protein_coding	lightgreen	darkred
ENSG00000076201	16.6366	21.1155	PTPN23	nonsense_mediated_decay	lightgreen	green
ENSG00000131725	11.5541	6.4775	WDR44	protein_coding	lightgreen	green
ENSG00000146282	9.38345	7.33911	RARS2	protein_coding	lightgreen	green
ENSG00000169696	8.013	26.7706	ASPSCR1	protein_coding	lightgreen	green
ENSG00000179364	7.2881	23.828	PACS2	protein_coding	lightgreen	green
ENSG00000175471	6.62454	18.2156	MCTP1	processed_transcript	lightgreen	green
ENSG00000115541	5.66309	10.7729	HSPE1	protein_coding	lightgreen	green
ENSG00000106948	4.70934	18.1204	AKNA	protein_coding	lightgreen	green
ENSG00000099917	4.63259	9.69314	MED15	protein_coding	lightgreen	green
ENSG00000132005	4.56882	8.75892	HGNC:9982	protein_coding	lightgreen	green
ENSG00000172232	4.48065	4.80751	AZU1	protein_coding	lightgreen	green
ENSG00000141524	3.92618	25.0593	TMC6	protein_coding	lightgreen	green
ENSG00000186625	3.48458	14.6142	KATNA1	protein_coding	lightgreen	green
ENSG00000099308	2.7982	5.95258	MAST3	protein_coding	lightgreen	green
ENSG00000205758	12.9838	7.65175	CRYZL1	protein_coding	lightgreen	pink
ENSG00000115947	10.9872	3.52076	ORC4	protein_coding	lightgreen	pink
ENSG00000125351	10.6613	5.89589	UPF3B	protein_coding	lightgreen	pink
ENSG00000117620	8.38288	6.77495	SLC35A3	protein_coding	lightgreen	pink
ENSG00000149480	7.16618	0.832676	MTA2	protein_coding	lightgreen	pink
ENSG00000167395	6.69729	2.12085	ZNF646	protein_coding	lightgreen	pink
ENSG00000168884	5.72141	8.02284	TNIP2	protein_coding	lightgreen	pink
ENSG00000275832	5.03874	3.62133	ARHGAP23	protein_coding	lightgreen	pink
ENSG00000225470	4.97379	4.47809	JPX	lincRNA	lightgreen	pink
ENSG00000143772	4.17275	1.8868	ITPKB	protein_coding	lightgreen	pink
ENSG00000147119	3.92387	2.81915	CHST7	protein_coding	lightgreen	pink
ENSG00000090006	3.7516	2.01501	LTBP4	nonsense_mediated_decay	lightgreen	pink
ENSG00000130940	2.55796	6.51645	CASZ1	protein_coding	lightgreen	pink
ENSG00000033100	12.6213	4.08162	CHPF2	protein_coding	lightgreen	lightcyan1
ENSG00000218891	11.5546	1.07445	ZNF579	protein_coding	lightgreen	lightcyan1
ENSG00000156858	11.4648	1.72165	PRR14	retained_intron	lightgreen	lightcyan1
ENSG00000213015	10.5696	1.23972	ZNF580	protein_coding	lightgreen	lightcyan1
ENSG00000147251	8.31882	2.13328	DOCK11	protein_coding	lightgreen	lightcyan1
ENSG00000135049	4.22706	2.55314	AGTPBP1	protein_coding	lightgreen	lightcyan1
ENSG00000160813	3.67999	1.62097	PPP1R35	retained_intron	lightgreen	lightcyan1
ENSG00000126746	2.93008	0.607089	ZNF384	protein_coding	lightgreen	lightcyan1
ENSG00000144744	29.0866	134.125	UBA3	protein_coding	yellowgreen	darkolivegreen
ENSG00000158411	22.7985	75.8056	MITD1	processed_transcript	yellowgreen	darkolivegreen
ENSG00000151665	20.6488	18.9412	PIGF	protein_coding	yellowgreen	darkolivegreen
ENSG00000116001	20.3523	119.017	TIA1	protein_coding	yellowgreen	darkolivegreen
ENSG00000116871	20.154	39.3781	MAP7D1	protein_coding	yellowgreen	darkolivegreen
ENSG00000136699	18.9882	70.9768	SMPD4	nonsense_mediated_decay	yellowgreen	darkolivegreen
ENSG00000171604	18.6288	23.7644	CXXC5	protein_coding	yellowgreen	darkolivegreen
ENSG00000167491	17.8596	82.7483	GATAD2A	protein_coding	yellowgreen	darkolivegreen
ENSG00000088035	17.7467	33.6957	ALG6	protein_coding	yellowgreen	darkolivegreen
ENSG00000143493	17.7092	47.8145	INTS7	nonsense_mediated_decay	yellowgreen	darkolivegreen
ENSG00000122033	17.4665	35.4792	MTIF3	protein_coding	yellowgreen	darkolivegreen
ENSG00000272391	17.1963	31.5517	POM121C	retained_intron	yellowgreen	darkolivegreen
ENSG00000121067	15.1295	3.50626	SPOP	protein_coding	yellowgreen	darkolivegreen
ENSG00000116957	15.0327	73.1843	TBCE	protein_coding	yellowgreen	darkolivegreen
ENSG00000134152	15.0225	105.249	KATNBL1	protein_coding	yellowgreen	darkolivegreen
ENSG00000108423	14.9359	29.91	TUBD1	protein_coding	yellowgreen	darkolivegreen
ENSG00000164975	14.8924	42.3759	SNAPC3	protein_coding	yellowgreen	darkolivegreen
ENSG00000164187	14.6089	74.4067	LMBRD2	protein_coding	yellowgreen	darkolivegreen
ENSG00000188636	13.9	60.7226	LDOC1L	protein_coding	yellowgreen	darkolivegreen
ENSG00000130150	13.512	2.23631	MOSPD2	protein_coding	yellowgreen	darkolivegreen
ENSG00000138286	13.1437	20.5302	FAM149B1	protein_coding	yellowgreen	darkolivegreen
ENSG00000176095	11.9673	49.2956	IP6K1	protein_coding	yellowgreen	darkolivegreen
ENSG00000110435	11.4834	32.0273	PDHX	protein_coding	yellowgreen	darkolivegreen
ENSG00000109066	10.077	86.5305	TMEM104	protein_coding	yellowgreen	darkolivegreen
ENSG00000149115	9.72154	44.9866	TNKS1BP1	nonsense_mediated_decay	yellowgreen	darkolivegreen
ENSG00000183137	9.50154	11.2377	CEP57L1	protein_coding	yellowgreen	darkolivegreen
ENSG00000115840	8.915	2.85581	SLC25A12	protein_coding	yellowgreen	darkolivegreen
ENSG00000157933	8.08714	97.1391	SKI	protein_coding	yellowgreen	darkolivegreen
ENSG00000152942	7.82784	90.4888	RAD17	processed_transcript	yellowgreen	darkolivegreen
ENSG00000124782	7.54782	8.77246	RREB1	protein_coding	yellowgreen	darkolivegreen
ENSG00000080603	7.0791	50.9262	SRCAP	protein_coding	yellowgreen	darkolivegreen
ENSG00000004534	6.62219	8.85975	RBM6	protein_coding	yellowgreen	darkolivegreen
ENSG00000101945	6.52735	5.63533	SUV39H1	protein_coding	yellowgreen	darkolivegreen
ENSG00000152127	6.3184	15.4561	MGAT5	processed_transcript	yellowgreen	darkolivegreen
ENSG00000112033	6.26326	87.9763	PPARD	protein_coding	yellowgreen	darkolivegreen
ENSG00000225614	4.63361	4.41778	ZNF469	protein_coding	yellowgreen	darkolivegreen
ENSG00000163644	2.63587	10.5099	PPM1K	protein_coding	yellowgreen	darkolivegreen
ENSG00000099381	28.688	7.62344	SETD1A	protein_coding	yellowgreen	darkred
ENSG00000023041	16.5403	1.61564	ZDHHC6	protein_coding	yellowgreen	darkred
ENSG00000063169	16.2695	12.3116	GLTSCR1	protein_coding	yellowgreen	darkred
ENSG00000182919	15.0548	7.87896	C11orf54	protein_coding	yellowgreen	darkred
ENSG00000138190	14.181	3.56624	EXOC6	protein_coding	yellowgreen	darkred
ENSG00000111237	13.1528	5.50636	VPS29	protein_coding	yellowgreen	darkred
ENSG00000150990	12.6805	12.3599	DHX37	retained_intron	yellowgreen	darkred
ENSG00000165804	12.405	10.0651	ZNF219	protein_coding	yellowgreen	darkred
ENSG00000104412	10.5817	2.70381	EMC2	protein_coding	yellowgreen	darkred
ENSG00000172366	9.44021	8.29631	FAM195A	processed_transcript	yellowgreen	darkred
ENSG00000273247	9.11081	1.4424	RP11-83A24.2	antisense	yellowgreen	darkred
ENSG00000116525	7.73444	5.1977	TRIM62	protein_coding	yellowgreen	darkred
ENSG00000139974	6.47284	1.89946	SLC38A6	protein_coding	yellowgreen	darkred
ENSG00000109062	6.13596	0.922743	SLC9A3R1	protein_coding	yellowgreen	darkred
ENSG00000258711	6.03785	0.658077	RP11-218E20.3	lincRNA	yellowgreen	darkred
ENSG00000027847	5.88132	8.13461	B4GALT7	protein_coding	yellowgreen	darkred
ENSG00000100413	5.03138	4.15126	POLR3H	protein_coding	yellowgreen	darkred
ENSG00000079805	4.89422	19.9446	DNM2	protein_coding	yellowgreen	darkred
ENSG00000143537	3.47919	4.38806	ADAM15	processed_transcript	yellowgreen	darkred
ENSG00000188779	3.4291	5.88199	SKOR1	protein_coding	yellowgreen	darkred
ENSG00000167487	18.4058	2.78304	KLHL26	protein_coding	yellowgreen	lightcyan1
ENSG00000188807	14.9913	2.61597	TMEM201	protein_coding	yellowgreen	lightcyan1
ENSG00000110324	14.5795	2.07778	IL10RA	protein_coding	yellowgreen	lightcyan1
ENSG00000198909	8.20719	2.87669	MAP3K3	protein_coding	yellowgreen	lightcyan1
ENSG00000091039	4.81022	2.62095	OSBPL8	protein_coding	yellowgreen	lightcyan1
ENSG00000162711	85.4645	7.25689	NLRP3	protein_coding	darkorange2	brown4
ENSG00000124177	73.9028	6.44032	CHD6	protein_coding	darkorange2	brown4
ENSG00000121797	68.7989	17.894	CCRL2	protein_coding	darkorange2	brown4
ENSG00000163661	66.3766	17.9041	PTX3	protein_coding	darkorange2	brown4
ENSG00000081041	58.1831	17.6463	CXCL2	protein_coding	darkorange2	brown4
ENSG00000122641	57.2718	0.851476	INHBA	protein_coding	darkorange2	brown4
ENSG00000011422	56.4615	1.76373	PLAUR	protein_coding	darkorange2	brown4
ENSG00000103353	56.3784	2.67566	UBFD1	protein_coding	darkorange2	brown4
ENSG00000124882	55.9517	2.82004	EREG	protein_coding	darkorange2	brown4
ENSG00000163734	52.0563	13.7127	CXCL3	protein_coding	darkorange2	brown4
ENSG00000112149	46.9458	12.7921	CD83	protein_coding	darkorange2	brown4
ENSG00000173451	42.2034	13.1944	THAP2	protein_coding	darkorange2	brown4
ENSG00000117525	40.4276	20.9451	F3	protein_coding	darkorange2	brown4
ENSG00000124216	39.8416	3.53783	SNAI1	protein_coding	darkorange2	brown4
ENSG00000138166	39.5525	2.1381	DUSP5	protein_coding	darkorange2	brown4
ENSG00000198106	39.2714	1.59442	SNX29P2	lincRNA	darkorange2	brown4
ENSG00000119508	38.1816	7.6108	NR4A3	protein_coding	darkorange2	brown4
ENSG00000271614	32.0619	1.87969	LINC00936	lincRNA	darkorange2	brown4
ENSG00000233058	30.7804	1.49087	LINC00884	antisense	darkorange2	brown4
ENSG00000163739	29.6164	2.01067	CXCL1	processed_transcript	darkorange2	brown4
ENSG00000178409	28.7629	2.76402	BEND3	protein_coding	darkorange2	brown4
ENSG00000169981	24.3676	0.787578	ZNF35	protein_coding	darkorange2	brown4
ENSG00000260273	22.3859	0.589222	RP11-425D10.10	antisense	darkorange2	brown4
ENSG00000125538	19.8075	17.0792	IL1B	protein_coding	darkorange2	brown4
ENSG00000177096	18.8439	3.32103	FAM109B	protein_coding	darkorange2	brown4
ENSG00000255398	15.9241	3.53023	HCAR3	protein_coding	darkorange2	brown4
ENSG00000134909	12.1683	1.76088	ARHGAP32	protein_coding	darkorange2	brown4
ENSG00000169951	9.72828	5.36053	ZNF764	protein_coding	darkorange2	brown4
ENSG00000130164	9.48787	8.77411	LDLR	protein_coding	darkorange2	brown4
ENSG00000258082	5.6257	0.949363	RP11-443B7.3	lincRNA	darkorange2	brown4
ENSG00000143514	141.376	290.467	TP53BP2	protein_coding	darkorange2	blue
ENSG00000132912	140.99	377.038	DCTN4	protein_coding	darkorange2	blue
ENSG00000138081	137.451	286.859	FBXO11	nonsense_mediated_decay	darkorange2	blue
ENSG00000122482	133.76	340.15	ZNF644	protein_coding	darkorange2	blue
ENSG00000167258	131.571	48.423	CDK12	protein_coding	darkorange2	blue
ENSG00000162924	131.38	145.194	REL	protein_coding	darkorange2	blue
ENSG00000094975	125.817	208.165	SUCO	protein_coding	darkorange2	blue
ENSG00000152484	125.459	373.587	USP12	protein_coding	darkorange2	blue
ENSG00000272886	124.046	319.14	DCP1A	protein_coding	darkorange2	blue
ENSG00000139697	122.546	160.02	SBNO1	protein_coding	darkorange2	blue
ENSG00000072364	121.051	320.011	AFF4	protein_coding	darkorange2	blue
ENSG00000104983	120.584	179.84	CCDC61	retained_intron	darkorange2	blue
ENSG00000120616	120.297	168.386	EPC1	protein_coding	darkorange2	blue
ENSG00000159921	119.592	225.759	GNE	protein_coding	darkorange2	blue
ENSG00000164134	119.384	120.094	NAA15	protein_coding	darkorange2	blue
ENSG00000185728	119.268	229.273	YTHDF3	protein_coding	darkorange2	blue
ENSG00000109756	117.212	269.953	RAPGEF2	protein_coding	darkorange2	blue
ENSG00000141446	117.06	146.239	ESCO1	protein_coding	darkorange2	blue
ENSG00000170852	116.926	345.029	KBTBD2	protein_coding	darkorange2	blue
ENSG00000008083	114.899	230.548	JARID2	protein_coding	darkorange2	blue
ENSG00000213079	114.114	282.749	SCAF8	protein_coding	darkorange2	blue
ENSG00000116747	113.272	177.313	TROVE2	protein_coding	darkorange2	blue
ENSG00000169016	111.699	199.036	E2F6	nonsense_mediated_decay	darkorange2	blue
ENSG00000100281	111.019	302.346	HMGXB4	protein_coding	darkorange2	blue
ENSG00000147526	109.898	177.661	TACC1	protein_coding	darkorange2	blue
ENSG00000123066	109.312	277.95	MED13L	protein_coding	darkorange2	blue
ENSG00000163788	109.14	264.931	SNRK	protein_coding	darkorange2	blue
ENSG00000113013	109.102	362.946	HSPA9	protein_coding	darkorange2	blue
ENSG00000131381	109.001	171.458	ZFYVE20	protein_coding	darkorange2	blue
ENSG00000120063	108.865	200.84	GNA13	protein_coding	darkorange2	blue
ENSG00000122257	108.25	172.46	RBBP6	protein_coding	darkorange2	blue
ENSG00000083799	107.305	327.11	CYLD	protein_coding	darkorange2	blue
ENSG00000101544	106.672	297.151	ADNP2	protein_coding	darkorange2	blue
ENSG00000136603	106.153	262.807	SKIL	processed_transcript	darkorange2	blue
ENSG00000173276	104.74	48.0073	ZBTB21	protein_coding	darkorange2	blue
ENSG00000006634	104.277	241.473	DBF4	nonsense_mediated_decay	darkorange2	blue
ENSG00000178927	103.632	148.76	C17orf62	protein_coding	darkorange2	blue
ENSG00000115137	103.523	29.1686	DNAJC27	protein_coding	darkorange2	blue
ENSG00000187555	103.162	382.578	USP7	protein_coding	darkorange2	blue
ENSG00000169967	102.782	253.137	MAP3K2	protein_coding	darkorange2	blue
ENSG00000100393	101.447	167.35	EP300	protein_coding	darkorange2	blue
ENSG00000160218	101.36	139.184	TRAPPC10	protein_coding	darkorange2	blue
ENSG00000166822	101.042	375.052	TMEM170A	protein_coding	darkorange2	blue
ENSG00000155545	101.005	42.5406	MIER3	protein_coding	darkorange2	blue
ENSG00000117139	101.005	45.4105	KDM5B	protein_coding	darkorange2	blue
ENSG00000112406	100.871	290.804	HECA	protein_coding	darkorange2	blue
ENSG00000138073	100.629	181.939	PREB	retained_intron	darkorange2	blue
ENSG00000146457	100.489	264.457	WTAP	protein_coding	darkorange2	blue
ENSG00000101782	100.48	384.638	RIOK3	protein_coding	darkorange2	blue
ENSG00000124788	100.25	80.9364	ATXN1	protein_coding	darkorange2	blue
ENSG00000224531	100.012	73.279	SMIM13	protein_coding	darkorange2	blue
ENSG00000257702	99.8552	54.0452	LBX2-AS1	antisense	darkorange2	blue
ENSG00000165943	99.651	129.668	MOAP1	protein_coding	darkorange2	blue
ENSG00000120705	98.8894	345.816	ETF1	protein_coding	darkorange2	blue
ENSG00000067900	98.7542	320.558	ROCK1	protein_coding	darkorange2	blue
ENSG00000138069	98.5366	339.99	RAB1A	processed_transcript	darkorange2	blue
ENSG00000083642	98.1383	231.834	PDS5B	protein_coding	darkorange2	blue
ENSG00000106299	97.4916	141.113	WASL	protein_coding	darkorange2	blue
ENSG00000117523	96.8218	213.445	PRRC2C	processed_transcript	darkorange2	blue
ENSG00000145241	96.2503	187.663	CENPC	protein_coding	darkorange2	blue
ENSG00000160908	95.8793	204.654	ZNF394	processed_transcript	darkorange2	blue
ENSG00000113742	95.8533	58.3763	CPEB4	protein_coding	darkorange2	blue
ENSG00000165355	95.7999	46.0755	FBXO33	protein_coding	darkorange2	blue
ENSG00000065548	95.7515	289.195	ZC3H15	protein_coding	darkorange2	blue
ENSG00000164164	95.66	41.6804	OTUD4	processed_transcript	darkorange2	blue
ENSG00000157540	95.5897	352.323	DYRK1A	processed_transcript	darkorange2	blue
ENSG00000178607	95.1667	173.655	ERN1	protein_coding	darkorange2	blue
ENSG00000151893	95.132	171.723	CACUL1	processed_transcript	darkorange2	blue
ENSG00000092148	95.0597	122.158	HECTD1	protein_coding	darkorange2	blue
ENSG00000145916	94.7735	249.044	RMND5B	protein_coding	darkorange2	blue
ENSG00000110721	94.717	237.105	CHKA	protein_coding	darkorange2	blue
ENSG00000156650	94.6686	170.425	KAT6B	protein_coding	darkorange2	blue
ENSG00000169375	94.4144	270.251	SIN3A	protein_coding	darkorange2	blue
ENSG00000115520	94.3474	196.97	COQ10B	protein_coding	darkorange2	blue
ENSG00000113712	94.3118	300.508	CSNK1A1	protein_coding	darkorange2	blue
ENSG00000197780	93.3763	92.5808	TAF13	nonsense_mediated_decay	darkorange2	blue
ENSG00000169251	93.2229	155.104	NMD3	protein_coding	darkorange2	blue
ENSG00000172845	93.1885	291.647	SP3	protein_coding	darkorange2	blue
ENSG00000105705	92.9792	146.7	SUGP1	nonsense_mediated_decay	darkorange2	blue
ENSG00000165219	92.4453	194.524	GAPVD1	nonsense_mediated_decay	darkorange2	blue
ENSG00000166920	92.3246	115.206	C15orf48	protein_coding	darkorange2	blue
ENSG00000143409	91.9898	159.025	FAM63A	protein_coding	darkorange2	blue
ENSG00000113448	91.969	90.2579	PDE4D	protein_coding	darkorange2	blue
ENSG00000100711	91.1879	48.2824	ZFYVE21	protein_coding	darkorange2	blue
ENSG00000137055	90.8257	338.893	PLAA	protein_coding	darkorange2	blue
ENSG00000196233	90.4448	148.251	LCOR	protein_coding	darkorange2	blue
ENSG00000198900	89.3812	375.992	TOP1	protein_coding	darkorange2	blue
ENSG00000146676	89.2212	146.845	PURB	protein_coding	darkorange2	blue
ENSG00000005812	89.0823	324.046	FBXL3	processed_transcript	darkorange2	blue
ENSG00000005483	88.8272	233.381	KMT2E	protein_coding	darkorange2	blue
ENSG00000137947	88.5924	143.575	GTF2B	protein_coding	darkorange2	blue
ENSG00000162923	88.2666	252.561	WDR26	protein_coding	darkorange2	blue
ENSG00000197535	88.0758	80.4776	MYO5A	protein_coding	darkorange2	blue
ENSG00000165813	87.9649	146.191	CCDC186	protein_coding	darkorange2	blue
ENSG00000105835	87.5874	237.652	NAMPT	protein_coding	darkorange2	blue
ENSG00000114439	87.4721	85.9054	BBX	protein_coding	darkorange2	blue
ENSG00000101413	87.1232	259.508	RPRD1B	protein_coding	darkorange2	blue
ENSG00000166579	87.0369	56.5168	NDEL1	protein_coding	darkorange2	blue
ENSG00000155304	87.0312	373.809	HSPA13	protein_coding	darkorange2	blue
ENSG00000169895	86.8931	140.618	SYAP1	protein_coding	darkorange2	blue
ENSG00000108840	86.1173	23.8151	HDAC5	protein_coding	darkorange2	blue
ENSG00000121274	86.01	18.1504	PAPD5	protein_coding	darkorange2	blue
ENSG00000102977	85.871	65.1651	ACD	protein_coding	darkorange2	blue
ENSG00000252061	85.6884	83.767	RNU6-415P	snRNA	darkorange2	blue
ENSG00000151532	85.0742	286.85	VTI1A	processed_transcript	darkorange2	blue
ENSG00000158793	85.0698	91.5394	NIT1	processed_transcript	darkorange2	blue
ENSG00000198815	84.9476	223.781	FOXJ3	protein_coding	darkorange2	blue
ENSG00000008130	84.4976	61.9702	NADK	protein_coding	darkorange2	blue
ENSG00000089195	83.9218	195.189	TRMT6	processed_transcript	darkorange2	blue
ENSG00000101654	83.5199	245.579	RNMT	protein_coding	darkorange2	blue
ENSG00000171612	83.4724	223.358	SLC25A33	protein_coding	darkorange2	blue
ENSG00000165006	83.2813	254.576	UBAP1	protein_coding	darkorange2	blue
ENSG00000100796	82.511	340.196	SMEK1	protein_coding	darkorange2	blue
ENSG00000155096	81.814	271.815	AZIN1	protein_coding	darkorange2	blue
ENSG00000175104	81.7462	144.175	TRAF6	protein_coding	darkorange2	blue
ENSG00000196646	81.5102	73.2843	ZNF136	protein_coding	darkorange2	blue
ENSG00000126524	81.3826	82.3812	SBDS	protein_coding	darkorange2	blue
ENSG00000134077	80.9837	98.5547	THUMPD3	protein_coding	darkorange2	blue
ENSG00000120690	80.8726	178.566	ELF1	processed_transcript	darkorange2	blue
ENSG00000019995	80.6457	308.108	ZRANB1	protein_coding	darkorange2	blue
ENSG00000145675	80.3531	32.0743	PIK3R1	protein_coding	darkorange2	blue
ENSG00000127804	79.793	28.6453	METTL16	processed_transcript	darkorange2	blue
ENSG00000043093	79.1284	79.9216	DCUN1D1	protein_coding	darkorange2	blue
ENSG00000110048	79.0811	331.517	OSBP	protein_coding	darkorange2	blue
ENSG00000080371	78.8626	380.173	RAB21	protein_coding	darkorange2	blue
ENSG00000186431	78.663	153.395	FCAR	protein_coding	darkorange2	blue
ENSG00000125812	78.6396	159.898	GZF1	protein_coding	darkorange2	blue
ENSG00000213380	78.613	174.647	COG8	processed_transcript	darkorange2	blue
ENSG00000105993	78.5104	285.507	DNAJB6	protein_coding	darkorange2	blue
ENSG00000118689	78.1241	139.892	FOXO3	protein_coding	darkorange2	blue
ENSG00000178718	77.9519	182.645	RPP25	protein_coding	darkorange2	blue
ENSG00000215301	77.6896	207.572	DDX3X	processed_transcript	darkorange2	blue
ENSG00000156875	77.0312	343.442	HIAT1	protein_coding	darkorange2	blue
ENSG00000176597	76.9794	39.121	B3GNT5	protein_coding	darkorange2	blue
ENSG00000143303	76.5179	156.41	RRNAD1	protein_coding	darkorange2	blue
ENSG00000182957	76.2313	139.524	SPATA13	protein_coding	darkorange2	blue
ENSG00000143751	76.2081	165.878	SDE2	protein_coding	darkorange2	blue
ENSG00000086589	76.2067	321.623	RBM22	retained_intron	darkorange2	blue
ENSG00000110367	75.5326	343.203	DDX6	protein_coding	darkorange2	blue
ENSG00000173575	75.2523	217.72	CHD2	protein_coding	darkorange2	blue
ENSG00000177426	75.1949	103.535	TGIF1	protein_coding	darkorange2	blue
ENSG00000059758	75.1126	89.3391	CDK17	protein_coding	darkorange2	blue
ENSG00000132286	74.8887	192.384	TIMM10B	protein_coding	darkorange2	blue
ENSG00000230844	74.8598	162.421	ZNF674-AS1	lincRNA	darkorange2	blue
ENSG00000141385	74.6759	152.675	AFG3L2	protein_coding	darkorange2	blue
ENSG00000163602	74.4685	306.592	RYBP	protein_coding	darkorange2	blue
ENSG00000165650	73.9171	63.0352	PDZD8	protein_coding	darkorange2	blue
ENSG00000131873	73.8962	125.177	CHSY1	protein_coding	darkorange2	blue
ENSG00000198369	73.5513	188.96	SPRED2	protein_coding	darkorange2	blue
ENSG00000105053	73.4168	45.0148	VRK3	protein_coding	darkorange2	blue
ENSG00000174327	72.8892	32.1393	SLC16A13	protein_coding	darkorange2	blue
ENSG00000110713	72.7634	318.272	NUP98	protein_coding	darkorange2	blue
ENSG00000179115	72.759	89.9771	FARSA	protein_coding	darkorange2	blue
ENSG00000101417	72.7033	184.578	PXMP4	protein_coding	darkorange2	blue
ENSG00000186660	72.5557	381.966	ZFP91	protein_coding	darkorange2	blue
ENSG00000117500	72.2344	389.249	TMED5	protein_coding	darkorange2	blue
ENSG00000174738	72.1073	266.517	NR1D2	protein_coding	darkorange2	blue
ENSG00000187231	71.9992	257.601	SESTD1	protein_coding	darkorange2	blue
ENSG00000096401	71.2867	161.061	CDC5L	protein_coding	darkorange2	blue
ENSG00000268734	70.3976	214.369	CTB-61M7.2	lincRNA	darkorange2	blue
ENSG00000083520	70.3099	108.763	DIS3	protein_coding	darkorange2	blue
ENSG00000010017	70.1446	275.114	RANBP9	protein_coding	darkorange2	blue
ENSG00000008952	69.0571	362.361	SEC62	processed_transcript	darkorange2	blue
ENSG00000164219	69.0358	83.912	PGGT1B	protein_coding	darkorange2	blue
ENSG00000170836	67.8027	131.803	PPM1D	protein_coding	darkorange2	blue
ENSG00000135018	67.7124	243.726	UBQLN1	protein_coding	darkorange2	blue
ENSG00000151012	67.6413	157.637	SLC7A11	protein_coding	darkorange2	blue
ENSG00000135241	67.105	283.942	PNPLA8	protein_coding	darkorange2	blue
ENSG00000115946	66.913	102.887	PNO1	protein_coding	darkorange2	blue
ENSG00000112242	66.8554	170.128	E2F3	protein_coding	darkorange2	blue
ENSG00000145414	66.7967	70.5804	NAF1	protein_coding	darkorange2	blue
ENSG00000196850	66.0296	36.6742	PPTC7	protein_coding	darkorange2	blue
ENSG00000182578	65.5873	34.5294	CSF1R	nonsense_mediated_decay	darkorange2	blue
ENSG00000100221	65.5352	148.243	JOSD1	protein_coding	darkorange2	blue
ENSG00000139154	65.4606	148.013	AEBP2	protein_coding	darkorange2	blue
ENSG00000176542	64.925	286.397	KIAA2018	protein_coding	darkorange2	blue
ENSG00000187688	64.9198	46.7376	TRPV2	protein_coding	darkorange2	blue
ENSG00000260708	64.6394	20.6633	CTA-29F11.1	antisense	darkorange2	blue
ENSG00000143554	64.3323	101.367	SLC27A3	protein_coding	darkorange2	blue
ENSG00000109381	63.9694	123.263	ELF2	processed_transcript	darkorange2	blue
ENSG00000136504	63.7578	13.8221	KAT7	protein_coding	darkorange2	blue
ENSG00000108510	62.7556	110.987	MED13	protein_coding	darkorange2	blue
ENSG00000123983	62.5429	120.575	ACSL3	protein_coding	darkorange2	blue
ENSG00000163349	62.4318	130.405	HIPK1	protein_coding	darkorange2	blue
ENSG00000180530	62.4058	122.439	NRIP1	protein_coding	darkorange2	blue
ENSG00000166997	62.1586	88.575	CNPY4	protein_coding	darkorange2	blue
ENSG00000067334	61.7816	190.084	DNTTIP2	protein_coding	darkorange2	blue
ENSG00000100614	61.5372	267.555	PPM1A	protein_coding	darkorange2	blue
ENSG00000011132	61.313	189.191	APBA3	retained_intron	darkorange2	blue
ENSG00000151239	61.2705	156.238	TWF1	protein_coding	darkorange2	blue
ENSG00000166128	61.1689	370.686	RAB8B	protein_coding	darkorange2	blue
ENSG00000143442	61.1324	165.707	POGZ	protein_coding	darkorange2	blue
ENSG00000111859	61.0643	37.401	NEDD9	protein_coding	darkorange2	blue
ENSG00000169508	61.0086	104.79	GPR183	protein_coding	darkorange2	blue
ENSG00000213064	60.9356	15.8862	SFT2D2	processed_transcript	darkorange2	blue
ENSG00000109686	60.4745	33.1137	SH3D19	processed_transcript	darkorange2	blue
ENSG00000113811	60.3264	233.292	SELK	protein_coding	darkorange2	blue
ENSG00000170445	60.0902	122.983	HARS	protein_coding	darkorange2	blue
ENSG00000139946	59.9349	105.802	PELI2	protein_coding	darkorange2	blue
ENSG00000244459	59.8838	32.2772	RP11-1398P2.1	lincRNA	darkorange2	blue
ENSG00000169826	59.3969	329.241	CSGALNACT2	protein_coding	darkorange2	blue
ENSG00000116044	59.363	168.509	NFE2L2	protein_coding	darkorange2	blue
ENSG00000118007	58.6252	15.7402	STAG1	protein_coding	darkorange2	blue
ENSG00000225648	58.5947	48.0564	SBDSP1	processed_transcript	darkorange2	blue
ENSG00000096717	57.8597	167.395	SIRT1	protein_coding	darkorange2	blue
ENSG00000138386	57.2359	30.9163	NAB1	protein_coding	darkorange2	blue
ENSG00000110075	56.8735	343.931	PPP6R3	processed_transcript	darkorange2	blue
ENSG00000122912	56.8223	111.193	SLC25A16	processed_transcript	darkorange2	blue
ENSG00000152700	56.7596	147.541	SAR1B	protein_coding	darkorange2	blue
ENSG00000269982	56.4266	167.848	RP11-1020A11.2	antisense	darkorange2	blue
ENSG00000114098	56.2919	144.055	ARMC8	protein_coding	darkorange2	blue
ENSG00000178074	55.8555	146.046	C2orf69	protein_coding	darkorange2	blue
ENSG00000085998	55.6876	188.111	POMGNT1	protein_coding	darkorange2	blue
ENSG00000065526	55.3076	96.7607	SPEN	protein_coding	darkorange2	blue
ENSG00000015676	55.2203	146.354	NUDCD3	protein_coding	darkorange2	blue
ENSG00000135503	55.1707	67.4285	ACVR1B	protein_coding	darkorange2	blue
ENSG00000101361	55.1322	61.7382	NOP56	protein_coding	darkorange2	blue
ENSG00000107968	55.1091	110.275	MAP3K8	protein_coding	darkorange2	blue
ENSG00000274818	55.0359	31.8663	RP1-292L20.3	lincRNA	darkorange2	blue
ENSG00000128928	54.8571	153.946	IVD	protein_coding	darkorange2	blue
ENSG00000155640	54.7419	159.521	C10orf12	protein_coding	darkorange2	blue
ENSG00000107863	54.6614	61.036	ARHGAP21	protein_coding	darkorange2	blue
ENSG00000089902	54.638	211.2	RCOR1	protein_coding	darkorange2	blue
ENSG00000122882	54.5663	330.747	ECD	protein_coding	darkorange2	blue
ENSG00000171791	54.0567	78.9719	BCL2	protein_coding	darkorange2	blue
ENSG00000179456	53.9419	2.28434	ZBTB18	protein_coding	darkorange2	blue
ENSG00000196396	53.6144	119.139	PTPN1	protein_coding	darkorange2	blue
ENSG00000232559	53.4443	21.4022	GS1-124K5.12	unprocessed_pseudogene	darkorange2	blue
ENSG00000152520	53.3936	230.709	PAN3	retained_intron	darkorange2	blue
ENSG00000124731	53.237	38.4062	TREM1	protein_coding	darkorange2	blue
ENSG00000138593	53.2178	182.48	SECISBP2L	protein_coding	darkorange2	blue
ENSG00000168175	53.1299	294.536	MAPK1IP1L	protein_coding	darkorange2	blue
ENSG00000246731	52.9814	53.8216	MGC16275	antisense	darkorange2	blue
ENSG00000065613	52.9686	211.784	SLK	protein_coding	darkorange2	blue
ENSG00000123728	52.7165	251.821	RAP2C	protein_coding	darkorange2	blue
ENSG00000166451	52.661	96.7752	CENPN	protein_coding	darkorange2	blue
ENSG00000169439	52.6245	240.263	SDC2	protein_coding	darkorange2	blue
ENSG00000140259	51.8107	121.797	MFAP1	protein_coding	darkorange2	blue
ENSG00000119801	51.1466	140.21	YPEL5	protein_coding	darkorange2	blue
ENSG00000101126	50.9983	308.571	ADNP	protein_coding	darkorange2	blue
ENSG00000170759	49.9735	275.635	KIF5B	protein_coding	darkorange2	blue
ENSG00000276008	49.2976	5.41225	RP11-137H15.4	lincRNA	darkorange2	blue
ENSG00000165685	49.2612	109.741	TMEM52B	protein_coding	darkorange2	blue
ENSG00000126456	49.119	241.292	IRF3	processed_transcript	darkorange2	blue
ENSG00000174839	48.7411	148.339	DENND6A	protein_coding	darkorange2	blue
ENSG00000187626	48.6962	130.102	ZKSCAN4	protein_coding	darkorange2	blue
ENSG00000116704	48.3853	32.5752	SLC35D1	protein_coding	darkorange2	blue
ENSG00000137177	47.9626	78.5799	KIF13A	protein_coding	darkorange2	blue
ENSG00000008838	47.369	152.422	MED24	protein_coding	darkorange2	blue
ENSG00000146872	46.9803	229.629	TLK2	protein_coding	darkorange2	blue
ENSG00000167034	46.7681	15.207	NKX3-1	protein_coding	darkorange2	blue
ENSG00000137267	46.6788	56.861	TUBB2A	protein_coding	darkorange2	blue
ENSG00000138018	46.3773	55.0448	EPT1	protein_coding	darkorange2	blue
ENSG00000150456	46.3499	13.3931	N6AMT2	protein_coding	darkorange2	blue
ENSG00000095794	46.2471	48.9408	CREM	protein_coding	darkorange2	blue
ENSG00000134955	46.1228	15.0939	SLC37A2	protein_coding	darkorange2	blue
ENSG00000067064	46.063	194.676	IDI1	protein_coding	darkorange2	blue
ENSG00000131871	45.8311	267.363	VIMP	protein_coding	darkorange2	blue
ENSG00000182827	45.6535	339.623	ACBD3	protein_coding	darkorange2	blue
ENSG00000120053	45.4136	24.3434	GOT1	protein_coding	darkorange2	blue
ENSG00000198382	45.3571	57.7685	UVRAG	protein_coding	darkorange2	blue
ENSG00000138670	45.042	121.691	RASGEF1B	protein_coding	darkorange2	blue
ENSG00000057704	44.919	87.2334	TMCC3	protein_coding	darkorange2	blue
ENSG00000159140	44.9167	257.635	SON	protein_coding	darkorange2	blue
ENSG00000123575	44.5953	160.742	FAM199X	protein_coding	darkorange2	blue
ENSG00000156273	44.5283	193.118	BACH1	protein_coding	darkorange2	blue
ENSG00000178385	44.2372	37.0146	PLEKHM3	protein_coding	darkorange2	blue
ENSG00000099910	44.2031	28.4384	KLHL22	protein_coding	darkorange2	blue
ENSG00000105856	44.1122	258.93	HBP1	protein_coding	darkorange2	blue
ENSG00000080345	44.0786	100.439	RIF1	protein_coding	darkorange2	blue
ENSG00000109111	44.0015	156.669	SUPT6H	protein_coding	darkorange2	blue
ENSG00000115540	43.9786	54.5274	MOB4	protein_coding	darkorange2	blue
ENSG00000120137	43.6844	158.377	PANK3	protein_coding	darkorange2	blue
ENSG00000145979	43.679	162.634	TBC1D7	protein_coding	darkorange2	blue
ENSG00000120688	43.5658	167.913	WBP4	protein_coding	darkorange2	blue
ENSG00000204178	43.4293	308.156	TMEM57	protein_coding	darkorange2	blue
ENSG00000183826	43.4004	163.144	BTBD9	protein_coding	darkorange2	blue
ENSG00000130921	43.3877	110.788	C12orf65	protein_coding	darkorange2	blue
ENSG00000138750	43.2567	301.418	NUP54	retained_intron	darkorange2	blue
ENSG00000132953	42.6513	74.0836	XPO4	protein_coding	darkorange2	blue
ENSG00000122644	41.4611	53.4492	ARL4A	protein_coding	darkorange2	blue
ENSG00000254901	41.2546	68.6613	MEF2BNB	nonsense_mediated_decay	darkorange2	blue
ENSG00000112195	41.1652	47.8753	TREML2	protein_coding	darkorange2	blue
ENSG00000161921	40.8552	98.15	CXCL16	protein_coding	darkorange2	blue
ENSG00000059804	40.841	2.17389	SLC2A3	protein_coding	darkorange2	blue
ENSG00000139826	40.8276	27.9475	ABHD13	protein_coding	darkorange2	blue
ENSG00000129450	40.7825	22.2688	SIGLEC9	protein_coding	darkorange2	blue
ENSG00000115956	39.9553	112.494	PLEK	protein_coding	darkorange2	blue
ENSG00000168438	39.8336	30.3751	CDC40	retained_intron	darkorange2	blue
ENSG00000005889	39.7635	240.091	ZFX	processed_transcript	darkorange2	blue
ENSG00000090520	39.5891	237.159	DNAJB11	protein_coding	darkorange2	blue
ENSG00000166225	39.4909	35.5836	FRS2	protein_coding	darkorange2	blue
ENSG00000116455	39.393	18.3202	WDR77	protein_coding	darkorange2	blue
ENSG00000006744	38.6747	92.1636	ELAC2	retained_intron	darkorange2	blue
ENSG00000164758	38.3129	115.255	MED30	protein_coding	darkorange2	blue
ENSG00000139613	38.2125	282.984	SMARCC2	protein_coding	darkorange2	blue
ENSG00000115816	38.0292	192.848	CEBPZ	protein_coding	darkorange2	blue
ENSG00000113734	38.0147	17.7685	BNIP1	protein_coding	darkorange2	blue
ENSG00000035928	37.6999	17.3253	RFC1	protein_coding	darkorange2	blue
ENSG00000094914	37.2112	65.1795	AAAS	protein_coding	darkorange2	blue
ENSG00000078747	37.0893	293.974	ITCH	protein_coding	darkorange2	blue
ENSG00000135999	36.9981	163.707	EPC2	protein_coding	darkorange2	blue
ENSG00000087206	36.886	155.587	UIMC1	protein_coding	darkorange2	blue
ENSG00000137700	36.8617	11.4066	SLC37A4	processed_transcript	darkorange2	blue
ENSG00000033327	36.6499	152.566	GAB2	protein_coding	darkorange2	blue
ENSG00000267080	36.161	21.2686	ASB16-AS1	antisense	darkorange2	blue
ENSG00000154781	35.9788	133.137	CCDC174	retained_intron	darkorange2	blue
ENSG00000198380	35.9464	19.9773	GFPT1	protein_coding	darkorange2	blue
ENSG00000153827	35.5878	231.43	TRIP12	protein_coding	darkorange2	blue
ENSG00000234636	35.3235	140.057	MED14OS	antisense	darkorange2	blue
ENSG00000140455	35.2505	208.866	USP3	protein_coding	darkorange2	blue
ENSG00000184857	35.1754	65.7289	TMEM186	processed_transcript	darkorange2	blue
ENSG00000158615	35.1609	67.3838	PPP1R15B	protein_coding	darkorange2	blue
ENSG00000116285	34.5431	15.5395	ERRFI1	protein_coding	darkorange2	blue
ENSG00000273951	34.542	68.1395	RP4-620E11.8	sense_intronic	darkorange2	blue
ENSG00000164944	34.2388	24.5212	KIAA1429	protein_coding	darkorange2	blue
ENSG00000136270	34.2279	57.5591	TBRG4	protein_coding	darkorange2	blue
ENSG00000121879	34.0087	92.953	PIK3CA	protein_coding	darkorange2	blue
ENSG00000171475	33.9918	139.575	WIPF2	protein_coding	darkorange2	blue
ENSG00000156052	33.6039	44.0907	GNAQ	protein_coding	darkorange2	blue
ENSG00000204524	32.9954	14.94	ZNF805	protein_coding	darkorange2	blue
ENSG00000197405	32.6816	27.3209	C5AR1	processed_transcript	darkorange2	blue
ENSG00000124486	32.5421	337.447	USP9X	protein_coding	darkorange2	blue
ENSG00000175536	32.4702	6.98804	LIPT2	protein_coding	darkorange2	blue
ENSG00000157625	31.4216	164.391	TAB3	protein_coding	darkorange2	blue
ENSG00000142556	30.956	154.509	ZNF614	protein_coding	darkorange2	blue
ENSG00000042445	30.8656	86.1235	RETSAT	nonsense_mediated_decay	darkorange2	blue
ENSG00000144591	30.7643	83.0555	GMPPA	protein_coding	darkorange2	blue
ENSG00000149743	30.524	18.0848	TRPT1	protein_coding	darkorange2	blue
ENSG00000115275	30.4233	242.897	MOGS	protein_coding	darkorange2	blue
ENSG00000249252	30.1539	28.0525	RP11-665G4.1	antisense	darkorange2	blue
ENSG00000152409	30.0453	123.213	JMY	protein_coding	darkorange2	blue
ENSG00000172262	29.8951	156.682	ZNF131	retained_intron	darkorange2	blue
ENSG00000124496	29.6	2.53192	TRERF1	protein_coding	darkorange2	blue
ENSG00000112081	28.4656	283.296	SRSF3	nonsense_mediated_decay	darkorange2	blue
ENSG00000168152	28.4208	70.9521	THAP9	nonsense_mediated_decay	darkorange2	blue
ENSG00000007944	28.165	3.42131	MYLIP	protein_coding	darkorange2	blue
ENSG00000142867	28.0365	35.446	BCL10	protein_coding	darkorange2	blue
ENSG00000229644	27.6027	3.08743	NAMPTL	processed_pseudogene	darkorange2	blue
ENSG00000134461	27.4824	58.4805	ANKRD16	protein_coding	darkorange2	blue
ENSG00000065060	27.3521	59.3337	UHRF1BP1	protein_coding	darkorange2	blue
ENSG00000162852	26.0615	136.407	CNST	processed_transcript	darkorange2	blue
ENSG00000153187	25.9923	32.4734	HNRNPU	protein_coding	darkorange2	blue
ENSG00000178726	25.883	27.3606	THBD	protein_coding	darkorange2	blue
ENSG00000156675	25.6034	103.1	RAB11FIP1	protein_coding	darkorange2	blue
ENSG00000183020	25.1712	114.01	AP2A2	processed_transcript	darkorange2	blue
ENSG00000240859	25.1249	38.7763	AC093627.10	lincRNA	darkorange2	blue
ENSG00000197070	25.0307	64.6951	ARRDC1	protein_coding	darkorange2	blue
ENSG00000153406	25.0061	35.6641	NMRAL1	protein_coding	darkorange2	blue
ENSG00000114062	24.7145	348.207	UBE3A	protein_coding	darkorange2	blue
ENSG00000008513	24.7136	163.135	ST3GAL1	protein_coding	darkorange2	blue
ENSG00000012822	24.6185	147.559	CALCOCO1	protein_coding	darkorange2	blue
ENSG00000198363	24.2055	7.10575	ASPH	protein_coding	darkorange2	blue
ENSG00000238133	24.1832	10.018	MLK7-AS1	antisense	darkorange2	blue
ENSG00000134086	23.9929	149.482	VHL	protein_coding	darkorange2	blue
ENSG00000138398	23.9022	282.329	PPIG	protein_coding	darkorange2	blue
ENSG00000025800	23.8453	99.183	KPNA6	protein_coding	darkorange2	blue
ENSG00000197150	23.4469	41.5318	ABCB8	protein_coding	darkorange2	blue
ENSG00000180822	23.03	115.446	PSMG4	nonsense_mediated_decay	darkorange2	blue
ENSG00000134352	22.7851	36.186	IL6ST	protein_coding	darkorange2	blue
ENSG00000232098	22.4999	48.7652	CTD-2619J13.14	lincRNA	darkorange2	blue
ENSG00000197321	22.4744	32.2795	SVIL	protein_coding	darkorange2	blue
ENSG00000197557	22.2192	3.43958	TTC30A	protein_coding	darkorange2	blue
ENSG00000247572	22.2126	45.5706	CKMT2-AS1	antisense	darkorange2	blue
ENSG00000116062	22.0631	6.81186	MSH6	processed_transcript	darkorange2	blue
ENSG00000175105	21.7398	85.7594	ZNF654	protein_coding	darkorange2	blue
ENSG00000092929	21.6189	65.0211	UNC13D	protein_coding	darkorange2	blue
ENSG00000188825	21.3835	27.4266	LINC00910	lincRNA	darkorange2	blue
ENSG00000141485	21.2697	118.975	SLC13A5	protein_coding	darkorange2	blue
ENSG00000116095	20.6037	182.501	PLEKHA3	protein_coding	darkorange2	blue
ENSG00000198917	20.1892	176.558	C9orf114	protein_coding	darkorange2	blue
ENSG00000167578	19.7027	19.5415	RAB4B	protein_coding	darkorange2	blue
ENSG00000272686	19.651	40.9305	RP11-390E23.6	antisense	darkorange2	blue
ENSG00000160602	19.418	20.7196	NEK8	protein_coding	darkorange2	blue
ENSG00000115042	19.3168	33.385	FAHD2A	protein_coding	darkorange2	blue
ENSG00000270062	19.2953	3.22077	RP11-248J18.3	sense_intronic	darkorange2	blue
ENSG00000135439	19.2131	31.2377	AGAP2	protein_coding	darkorange2	blue
ENSG00000272267	18.9286	19.5731	RP11-375N15.2	antisense	darkorange2	blue
ENSG00000163785	18.6869	140.591	RYK	processed_transcript	darkorange2	blue
ENSG00000128908	18.4654	102.1	INO80	protein_coding	darkorange2	blue
ENSG00000163624	18.0863	71.5902	CDS1	protein_coding	darkorange2	blue
ENSG00000084764	18.0517	10.2991	MAPRE3	protein_coding	darkorange2	blue
ENSG00000173928	18.0107	71.4632	SWSAP1	protein_coding	darkorange2	blue
ENSG00000101109	17.9187	58.1843	STK4	protein_coding	darkorange2	blue
ENSG00000141664	17.8875	24.754	ZCCHC2	protein_coding	darkorange2	blue
ENSG00000159761	17.7142	62.3045	C16orf86	retained_intron	darkorange2	blue
ENSG00000113555	17.538	7.38439	PCDH12	protein_coding	darkorange2	blue
ENSG00000115129	17.3109	12.8499	TP53I3	protein_coding	darkorange2	blue
ENSG00000138964	17.2688	144.937	PARVG	processed_transcript	darkorange2	blue
ENSG00000257108	17.2671	13.0968	NHLRC4	protein_coding	darkorange2	blue
ENSG00000147872	17.1753	29.9503	PLIN2	processed_transcript	darkorange2	blue
ENSG00000128694	16.9061	40.7152	OSGEPL1	protein_coding	darkorange2	blue
ENSG00000138463	16.7236	140.661	DIRC2	protein_coding	darkorange2	blue
ENSG00000225177	15.6048	31.5873	FLJ46906	antisense	darkorange2	blue
ENSG00000170909	15.2002	11.073	OSCAR	protein_coding	darkorange2	blue
ENSG00000131023	14.85	40.9327	LATS1	protein_coding	darkorange2	blue
ENSG00000148399	14.8329	198.37	DPH7	processed_transcript	darkorange2	blue
ENSG00000138032	14.3915	207.367	PPM1B	protein_coding	darkorange2	blue
ENSG00000119138	14.2765	58.544	KLF9	protein_coding	darkorange2	blue
ENSG00000153147	13.5743	77.3032	SMARCA5	protein_coding	darkorange2	blue
ENSG00000125122	13.0664	10.52	LRRC29	protein_coding	darkorange2	blue
ENSG00000279086	12.8596	86.9187	RP11-667F14.1	TEC	darkorange2	blue
ENSG00000161920	12.7365	7.02004	MED11	protein_coding	darkorange2	blue
ENSG00000169994	12.5338	2.95684	MYO7B	protein_coding	darkorange2	blue
ENSG00000068971	12.4403	107.662	PPP2R5B	processed_transcript	darkorange2	blue
ENSG00000163681	12.3081	282.759	SLMAP	processed_transcript	darkorange2	blue
ENSG00000182481	12.2489	23.3897	KPNA2	protein_coding	darkorange2	blue
ENSG00000137098	12.0406	67.4726	SPAG8	retained_intron	darkorange2	blue
ENSG00000154429	12.0311	45.0571	CCSAP	protein_coding	darkorange2	blue
ENSG00000168434	11.9031	14.2663	COG7	protein_coding	darkorange2	blue
ENSG00000112531	11.5088	252.03	QKI	nonsense_mediated_decay	darkorange2	blue
ENSG00000167393	11.172	94.6013	PPP2R3B	protein_coding	darkorange2	blue
ENSG00000104881	10.7887	8.22516	PPP1R13L	protein_coding	darkorange2	blue
ENSG00000115207	9.55117	31.0421	GTF3C2	protein_coding	darkorange2	blue
ENSG00000168874	9.14483	5.34179	ATOH8	processed_transcript	darkorange2	blue
ENSG00000084774	9.06827	257.582	CAD	protein_coding	darkorange2	blue
ENSG00000272839	8.29999	25.9246	RP11-452C13.1	antisense	darkorange2	blue
ENSG00000110848	8.27558	25.9468	CD69	protein_coding	darkorange2	blue
ENSG00000132170	7.79068	12.1511	PPARG	protein_coding	darkorange2	blue
ENSG00000186352	7.74448	31.216	ANKRD37	processed_transcript	darkorange2	blue
ENSG00000143434	7.71665	74.7972	SEMA6C	protein_coding	darkorange2	blue
ENSG00000114315	7.57102	63.8446	HES1	protein_coding	darkorange2	blue
ENSG00000136634	7.47971	42.2705	IL10	protein_coding	darkorange2	blue
ENSG00000011114	7.42521	52.7823	BTBD7	nonsense_mediated_decay	darkorange2	blue
ENSG00000115590	7.39321	41.6646	IL1R2	protein_coding	darkorange2	blue
ENSG00000229124	6.86136	21.9552	VIM-AS1	antisense	darkorange2	blue
ENSG00000123358	6.2266	49.4918	NR4A1	protein_coding	darkorange2	blue
ENSG00000115318	5.35915	6.27001	LOXL3	retained_intron	darkorange2	blue
ENSG00000183597	4.74003	36.8333	TANGO2	retained_intron	darkorange2	blue
ENSG00000104738	3.64668	13.7367	MCM4	protein_coding	darkorange2	blue
ENSG00000189067	3.4184	54.6364	LITAF	protein_coding	darkorange2	blue
ENSG00000198455	14.3229	3.72412	ZXDB	protein_coding	palevioletred3	blue
ENSG00000136451	14.2721	160.16	VEZF1	protein_coding	palevioletred3	blue
ENSG00000177485	14.2352	133.884	ZBTB33	protein_coding	palevioletred3	blue
ENSG00000084093	14.0133	126.998	REST	protein_coding	palevioletred3	blue
ENSG00000143756	12.4801	19.1169	FBXO28	protein_coding	palevioletred3	blue
ENSG00000215251	11.8801	45.8258	FASTKD5	protein_coding	palevioletred3	blue
ENSG00000168092	11.874	180.898	PAFAH1B2	protein_coding	palevioletred3	blue
ENSG00000170677	11.8368	177.292	SOCS6	protein_coding	palevioletred3	blue
ENSG00000162775	11.4021	73.9657	RBM15	protein_coding	palevioletred3	blue
ENSG00000169641	11.3731	72.5924	LUZP1	protein_coding	palevioletred3	blue
ENSG00000204560	11.3155	177.483	DHX16	protein_coding	palevioletred3	blue
ENSG00000198492	11.0665	46.7473	YTHDF2	protein_coding	palevioletred3	blue
ENSG00000179833	11.0206	20.1929	SERTAD2	protein_coding	palevioletred3	blue
ENSG00000147679	10.9654	74.1849	UTP23	protein_coding	palevioletred3	blue
ENSG00000166170	10.868	129.765	BAG5	protein_coding	palevioletred3	blue
ENSG00000126804	10.6777	73.1897	ZBTB1	processed_transcript	palevioletred3	blue
ENSG00000149658	9.9055	198.103	YTHDF1	protein_coding	palevioletred3	blue
ENSG00000101665	9.8112	106.218	SMAD7	protein_coding	palevioletred3	blue
ENSG00000117133	9.71508	73.1434	RPF1	protein_coding	palevioletred3	blue
ENSG00000213762	9.35714	5.94579	ZNF134	processed_transcript	palevioletred3	blue
ENSG00000175376	9.02728	37.0928	EIF1AD	protein_coding	palevioletred3	blue
ENSG00000186767	8.79687	39.2644	SPIN4	protein_coding	palevioletred3	blue
ENSG00000253251	8.77845	41.9241	CTC-534A2.2	protein_coding	palevioletred3	blue
ENSG00000124688	8.57514	50.9279	MAD2L1BP	protein_coding	palevioletred3	blue
ENSG00000174579	8.15656	86.1765	MSL2	protein_coding	palevioletred3	blue
ENSG00000101246	8.09062	64.3471	ARFRP1	protein_coding	palevioletred3	blue
ENSG00000136159	7.52045	111.976	NUDT15	protein_coding	palevioletred3	blue
ENSG00000198093	7.52036	4.17444	ZNF649	protein_coding	palevioletred3	blue
ENSG00000107362	7.2832	12.5146	ABHD17B	protein_coding	palevioletred3	blue
ENSG00000144580	7.22751	213.234	RQCD1	protein_coding	palevioletred3	blue
ENSG00000152443	7.05646	12.195	ZNF776	protein_coding	palevioletred3	blue
ENSG00000168612	6.95306	70.4774	ZSWIM1	protein_coding	palevioletred3	blue
ENSG00000123505	6.93324	125.826	AMD1	protein_coding	palevioletred3	blue
ENSG00000146757	6.58785	94.3434	ZNF92	protein_coding	palevioletred3	blue
ENSG00000214106	6.19577	13.0307	PAXIP1OS	antisense	palevioletred3	blue
ENSG00000176715	5.87562	85.3942	ACSF3	protein_coding	palevioletred3	blue
ENSG00000168876	5.70604	108.433	ANKRD49	protein_coding	palevioletred3	blue
ENSG00000146192	5.61156	101.346	FGD2	retained_intron	palevioletred3	blue
ENSG00000189266	5.55936	384.161	PNRC2	protein_coding	palevioletred3	blue
ENSG00000261609	5.49443	123.643	GAN	protein_coding	palevioletred3	blue
ENSG00000115738	5.48405	22.6868	ID2	protein_coding	palevioletred3	blue
ENSG00000214517	5.20669	16.3287	PPME1	protein_coding	palevioletred3	blue
ENSG00000101019	5.20133	6.65344	UQCC1	retained_intron	palevioletred3	blue
ENSG00000177479	4.33139	104.73	ARIH2	protein_coding	palevioletred3	blue
ENSG00000100104	4.2095	4.01926	SRRD	protein_coding	palevioletred3	blue
ENSG00000172466	3.74982	107.346	ZNF24	protein_coding	palevioletred3	blue
ENSG00000198642	3.53587	27.7525	KLHL9	protein_coding	palevioletred3	blue
ENSG00000162972	3.2695	133.446	C2orf47	protein_coding	palevioletred3	blue
ENSG00000115266	3.15509	52.5677	APC2	protein_coding	palevioletred3	blue
ENSG00000150316	3.00145	91.0463	CWC15	protein_coding	palevioletred3	blue
ENSG00000198783	2.76084	17.2486	ZNF830	protein_coding	palevioletred3	blue
ENSG00000178974	2.72973	160.677	FBXO34	protein_coding	palevioletred3	blue
ENSG00000143367	2.67116	210.687	TUFT1	protein_coding	palevioletred3	blue
ENSG00000170364	2.38142	22.4397	SETMAR	protein_coding	palevioletred3	blue
ENSG00000234771	516.571	12.8988	SLC25A25-AS1	antisense	bisque4	salmon
ENSG00000266714	487.423	8.43966	MYO15B	processed_transcript	bisque4	salmon
ENSG00000221978	483.837	5.4684	CCNL2	retained_intron	bisque4	salmon
ENSG00000075826	417.921	7.20932	SEC31B	protein_coding	bisque4	salmon
ENSG00000129467	382.07	9.61196	ADCY4	protein_coding	bisque4	salmon
ENSG00000129219	366.946	10.6764	PLD2	protein_coding	bisque4	salmon
ENSG00000065427	355.385	7.17073	KARS	protein_coding	bisque4	salmon
ENSG00000185024	353.989	15.1691	BRF1	protein_coding	bisque4	salmon
ENSG00000185101	341.47	1.54831	ANO9	retained_intron	bisque4	salmon
ENSG00000198556	324.344	5.44628	ZNF789	protein_coding	bisque4	salmon
ENSG00000108474	314.757	2.02122	PIGL	retained_intron	bisque4	salmon
ENSG00000246575	299.758	1.27335	AC093162.5	unprocessed_pseudogene	bisque4	salmon
ENSG00000279207	263.649	1.4741	RP11-159D12.8	TEC	bisque4	salmon
ENSG00000180902	256.184	2.69845	D2HGDH	protein_coding	bisque4	salmon
ENSG00000100197	254.123	7.27856	CYP2D6	nonsense_mediated_decay	bisque4	salmon
ENSG00000162576	242.72	5.74679	MXRA8	retained_intron	bisque4	salmon
ENSG00000164040	241.13	3.56032	PGRMC2	protein_coding	bisque4	salmon
ENSG00000267096	240.616	3.01532	CTD-2537I9.13	sense_intronic	bisque4	salmon
ENSG00000227741	238.368	4.18707	RP11-536C5.7	antisense	bisque4	salmon
ENSG00000148110	222.697	0.627599	HIATL1	protein_coding	bisque4	salmon
ENSG00000205423	218.838	0.939422	CNEP1R1	protein_coding	bisque4	salmon
ENSG00000143320	217.174	2.97127	CRABP2	protein_coding	bisque4	salmon
ENSG00000171421	208.673	0.935062	MRPL36	protein_coding	bisque4	salmon
ENSG00000101194	207.121	3.74695	SLC17A9	protein_coding	bisque4	salmon
ENSG00000185245	200.265	5.37797	GP1BA	protein_coding	bisque4	salmon
ENSG00000136271	198.302	3.27898	DDX56	protein_coding	bisque4	salmon
ENSG00000145545	179.759	2.99799	SRD5A1	protein_coding	bisque4	salmon
ENSG00000133678	172.946	3.17012	TMEM254	processed_transcript	bisque4	salmon
ENSG00000270015	172.773	1.04458	RP11-540B6.6	sense_intronic	bisque4	salmon
ENSG00000225889	171.858	0.586076	AC074289.1	antisense	bisque4	salmon
ENSG00000107262	157.337	7.13218	BAG1	processed_transcript	bisque4	salmon
ENSG00000048828	153.601	5.94162	FAM120A	protein_coding	bisque4	salmon
ENSG00000100568	144.873	8.29569	VTI1B	protein_coding	bisque4	salmon
ENSG00000118705	142.869	5.94964	RPN2	protein_coding	bisque4	salmon
ENSG00000104660	141.471	0.969959	LEPROTL1	protein_coding	bisque4	salmon
ENSG00000269751	138.236	2.50563	CTC-273B12.8	lincRNA	bisque4	salmon
ENSG00000141096	132.621	3.76218	DPEP3	protein_coding	bisque4	salmon
ENSG00000167701	130.988	7.54039	GPT	protein_coding	bisque4	salmon
ENSG00000265681	113.318	0.721036	RPL17	protein_coding	bisque4	salmon
ENSG00000141527	102.343	1.0817	CARD14	protein_coding	bisque4	salmon
ENSG00000158428	101.252	0.624793	CATIP	protein_coding	bisque4	salmon
ENSG00000134049	97.112	7.87449	IER3IP1	protein_coding	bisque4	salmon
ENSG00000107611	96.0358	1.44177	CUBN	protein_coding	bisque4	salmon
ENSG00000257176	91.4623	1.02085	RP11-996F15.2	antisense	bisque4	salmon
ENSG00000144635	90.3853	9.35775	DYNC1LI1	protein_coding	bisque4	salmon
ENSG00000225973	89.7162	0.692694	PIGBOS1	protein_coding	bisque4	salmon
ENSG00000258123	87.2634	2.59676	RP11-314D7.2	lincRNA	bisque4	salmon
ENSG00000213199	83.4663	3.36685	ASIC3	protein_coding	bisque4	salmon
ENSG00000120437	76.3733	0.946397	ACAT2	protein_coding	bisque4	salmon
ENSG00000204634	75.7562	2.06014	TBC1D8	protein_coding	bisque4	salmon
ENSG00000040487	73.1329	4.964	PQLC2	protein_coding	bisque4	salmon
ENSG00000116852	67.3698	4.79912	KIF21B	protein_coding	bisque4	salmon
ENSG00000136828	64.2589	1.3704	RALGPS1	protein_coding	bisque4	salmon
ENSG00000134013	60.7901	0.248638	LOXL2	protein_coding	bisque4	salmon
ENSG00000152291	58.4096	3.07918	TGOLN2	protein_coding	bisque4	salmon
ENSG00000082701	54.9315	1.46681	GSK3B	protein_coding	bisque4	salmon
ENSG00000104177	53.2282	3.35063	MYEF2	protein_coding	bisque4	salmon
ENSG00000264269	52.8566	0.481153	RP11-15F12.1	antisense	bisque4	salmon
ENSG00000189350	50.8087	2.50814	FAM179A	protein_coding	bisque4	salmon
ENSG00000135002	48.9477	2.93826	RFK	protein_coding	bisque4	salmon
ENSG00000188130	46.3579	1.64182	MAPK12	processed_transcript	bisque4	salmon
ENSG00000135776	45.8883	5.69796	ABCB10	protein_coding	bisque4	salmon
ENSG00000019102	45.4775	3.19181	VSIG2	protein_coding	bisque4	salmon
ENSG00000164342	44.9598	0.256576	TLR3	protein_coding	bisque4	salmon
ENSG00000165300	44.6561	1.04709	SLITRK5	protein_coding	bisque4	salmon
ENSG00000162804	15.71	1.5171	SNED1	protein_coding	bisque4	salmon
ENSG00000158106	13.7403	1.53626	RHPN1	protein_coding	bisque4	salmon
ENSG00000198742	455.413	135.57	SMURF1	protein_coding	bisque4	darkolivegreen
ENSG00000105576	442.549	29.8921	TNPO2	protein_coding	bisque4	darkolivegreen
ENSG00000213928	439.754	19.6495	IRF9	protein_coding	bisque4	darkolivegreen
ENSG00000185619	434.31	15.5412	PCGF3	protein_coding	bisque4	darkolivegreen
ENSG00000104957	431.087	37.0428	CCDC130	retained_intron	bisque4	darkolivegreen
ENSG00000103168	429.646	33.3253	TAF1C	protein_coding	bisque4	darkolivegreen
ENSG00000152117	426.227	93.5849	AC093838.4	transcribed_processed_pseudogene	bisque4	darkolivegreen
ENSG00000254995	425.247	15.0072	STX16-NPEPL1	nonsense_mediated_decay	bisque4	darkolivegreen
ENSG00000104859	425.2	64.6425	CLASRP	protein_coding	bisque4	darkolivegreen
ENSG00000100099	418.648	40.8101	HPS4	processed_transcript	bisque4	darkolivegreen
ENSG00000125834	415.844	71.591	STK35	protein_coding	bisque4	darkolivegreen
ENSG00000134571	415.637	28.3743	MYBPC3	protein_coding	bisque4	darkolivegreen
ENSG00000268218	414.995	52.0986	AC137932.4	antisense	bisque4	darkolivegreen
ENSG00000140400	410.656	22.538	MAN2C1	protein_coding	bisque4	darkolivegreen
ENSG00000147471	410.389	101.824	PROSC	protein_coding	bisque4	darkolivegreen
ENSG00000141258	408.546	61.5778	SGSM2	nonsense_mediated_decay	bisque4	darkolivegreen
ENSG00000165782	408.259	134.182	TMEM55B	protein_coding	bisque4	darkolivegreen
ENSG00000187775	402.018	53.6254	DNAH17	nonsense_mediated_decay	bisque4	darkolivegreen
ENSG00000198799	400.48	6.86492	LRIG2	protein_coding	bisque4	darkolivegreen
ENSG00000198218	398.226	99.2385	QRICH1	protein_coding	bisque4	darkolivegreen
ENSG00000011021	397.532	72.0689	CLCN6	protein_coding	bisque4	darkolivegreen
ENSG00000006007	395.99	44.6126	GDE1	protein_coding	bisque4	darkolivegreen
ENSG00000260841	395.31	1.49481	CTC-205M6.5	sense_overlapping	bisque4	darkolivegreen
ENSG00000146830	393.911	49.3746	GIGYF1	protein_coding	bisque4	darkolivegreen
ENSG00000198026	393.866	93.3022	ZNF335	protein_coding	bisque4	darkolivegreen
ENSG00000158773	390.827	27.5948	USF1	protein_coding	bisque4	darkolivegreen
ENSG00000087266	387.924	91.9363	SH3BP2	protein_coding	bisque4	darkolivegreen
ENSG00000236017	387.364	26.5588	ASMTL-AS1	antisense	bisque4	darkolivegreen
ENSG00000145990	381.965	53.3797	GFOD1	protein_coding	bisque4	darkolivegreen
ENSG00000100918	379.898	33.814	REC8	protein_coding	bisque4	darkolivegreen
ENSG00000102225	373.454	118.915	CDK16	processed_transcript	bisque4	darkolivegreen
ENSG00000179335	369.561	18.4022	CLK3	processed_transcript	bisque4	darkolivegreen
ENSG00000272734	367.369	16.3019	ADIRF-AS1	retained_intron	bisque4	darkolivegreen
ENSG00000187239	366.484	31.2011	FNBP1	protein_coding	bisque4	darkolivegreen
ENSG00000132300	366.255	17.3273	PTCD3	protein_coding	bisque4	darkolivegreen
ENSG00000243650	366.114	11.9009	RN7SL834P	misc_RNA	bisque4	darkolivegreen
ENSG00000162521	365.704	89.6239	RBBP4	protein_coding	bisque4	darkolivegreen
ENSG00000260005	359.362	45.371	AC027601.1	antisense	bisque4	darkolivegreen
ENSG00000101199	357.286	76.4801	ARFGAP1	protein_coding	bisque4	darkolivegreen
ENSG00000170515	356.894	38.3935	PA2G4	protein_coding	bisque4	darkolivegreen
ENSG00000047578	354.43	53.9412	KIAA0556	retained_intron	bisque4	darkolivegreen
ENSG00000122203	354.123	38.2017	KIAA1191	protein_coding	bisque4	darkolivegreen
ENSG00000054967	351.855	109.183	RELT	protein_coding	bisque4	darkolivegreen
ENSG00000196547	351.847	14.487	MAN2A2	protein_coding	bisque4	darkolivegreen
ENSG00000158805	351.766	54.4455	ZNF276	nonsense_mediated_decay	bisque4	darkolivegreen
ENSG00000161265	347.687	26.4511	U2AF1L4	nonsense_mediated_decay	bisque4	darkolivegreen
ENSG00000064547	345.28	13.4349	LPAR2	protein_coding	bisque4	darkolivegreen
ENSG00000116809	338.495	114.973	ZBTB17	processed_transcript	bisque4	darkolivegreen
ENSG00000173480	337.942	20.1263	ZNF417	protein_coding	bisque4	darkolivegreen
ENSG00000123472	333.712	90.9404	ATPAF1	protein_coding	bisque4	darkolivegreen
ENSG00000164663	332.345	1.2998	USP49	protein_coding	bisque4	darkolivegreen
ENSG00000259529	331.781	32.2134	IRF9	nonsense_mediated_decay	bisque4	darkolivegreen
ENSG00000105875	330.782	50.8964	WDR91	protein_coding	bisque4	darkolivegreen
ENSG00000105339	326.409	95.9285	DENND3	protein_coding	bisque4	darkolivegreen
ENSG00000275700	326.089	14.7396	AATF	protein_coding	bisque4	darkolivegreen
ENSG00000054116	325.912	79.6889	TRAPPC3	protein_coding	bisque4	darkolivegreen
ENSG00000168710	325.008	17.4783	AHCYL1	protein_coding	bisque4	darkolivegreen
ENSG00000132463	322.215	122.776	GRSF1	protein_coding	bisque4	darkolivegreen
ENSG00000031698	321.888	20.6794	SARS	protein_coding	bisque4	darkolivegreen
ENSG00000120314	321.52	56.7093	WDR55	protein_coding	bisque4	darkolivegreen
ENSG00000253200	321.514	55.1808	RP11-582J16.5	antisense	bisque4	darkolivegreen
ENSG00000137817	316.502	69.4038	PARP6	protein_coding	bisque4	darkolivegreen
ENSG00000218809	312.498	20.7209	RP1-229K20.5	unprocessed_pseudogene	bisque4	darkolivegreen
ENSG00000168395	311.069	38.3355	ING5	retained_intron	bisque4	darkolivegreen
ENSG00000188211	309.047	70.045	NCR3LG1	protein_coding	bisque4	darkolivegreen
ENSG00000159658	308.286	8.65227	EFCAB14	protein_coding	bisque4	darkolivegreen
ENSG00000111540	304.83	83.8956	RAB5B	protein_coding	bisque4	darkolivegreen
ENSG00000184682	303.815	45.4841	PRR33	protein_coding	bisque4	darkolivegreen
ENSG00000185215	303.545	10.2462	TNFAIP2	processed_transcript	bisque4	darkolivegreen
ENSG00000113552	302.811	3.92051	GNPDA1	protein_coding	bisque4	darkolivegreen
ENSG00000139636	301.152	9.27197	LMBR1L	protein_coding	bisque4	darkolivegreen
ENSG00000140350	299.51	94.6402	ANP32A	protein_coding	bisque4	darkolivegreen
ENSG00000156709	298.183	72.9124	AIFM1	protein_coding	bisque4	darkolivegreen
ENSG00000141551	297.697	127.383	CSNK1D	nonsense_mediated_decay	bisque4	darkolivegreen
ENSG00000234290	291.69	7.9053	AC116366.6	antisense	bisque4	darkolivegreen
ENSG00000152234	288.945	21.0806	ATP5A1	protein_coding	bisque4	darkolivegreen
ENSG00000067704	281.864	134.263	IARS2	protein_coding	bisque4	darkolivegreen
ENSG00000101266	281.065	32.6678	CSNK2A1	protein_coding	bisque4	darkolivegreen
ENSG00000116161	275.377	62.559	CACYBP	protein_coding	bisque4	darkolivegreen
ENSG00000187735	275.334	49.337	TCEA1	protein_coding	bisque4	darkolivegreen
ENSG00000101079	274.384	23.6845	NDRG3	protein_coding	bisque4	darkolivegreen
ENSG00000183397	273.033	68.3249	C19orf71	protein_coding	bisque4	darkolivegreen
ENSG00000174871	272.863	37.6965	CNIH2	protein_coding	bisque4	darkolivegreen
ENSG00000094916	272.401	7.52613	CBX5	protein_coding	bisque4	darkolivegreen
ENSG00000176915	272.243	11.3585	ANKLE2	protein_coding	bisque4	darkolivegreen
ENSG00000167604	270.313	81.4801	NFKBID	nonsense_mediated_decay	bisque4	darkolivegreen
ENSG00000163875	265.787	94.5848	MEAF6	protein_coding	bisque4	darkolivegreen
ENSG00000197021	265.024	115.672	CXorf40B	protein_coding	bisque4	darkolivegreen
ENSG00000232956	264.467	29.7224	SNHG15	lincRNA	bisque4	darkolivegreen
ENSG00000112763	263.626	0.861885	BTN2A1	nonsense_mediated_decay	bisque4	darkolivegreen
ENSG00000108468	263.205	108.814	CBX1	protein_coding	bisque4	darkolivegreen
ENSG00000279821	262.913	14.8665	RP11-1334A24.5	TEC	bisque4	darkolivegreen
ENSG00000279838	260.986	13.9121	RP4-635A23.6	TEC	bisque4	darkolivegreen
ENSG00000175166	260.806	5.25082	PSMD2	protein_coding	bisque4	darkolivegreen
ENSG00000127081	258.453	3.5516	ZNF484	protein_coding	bisque4	darkolivegreen
ENSG00000017797	258.132	83.3501	RALBP1	protein_coding	bisque4	darkolivegreen
ENSG00000186298	257.696	81.1965	PPP1CC	protein_coding	bisque4	darkolivegreen
ENSG00000188554	257.144	153.999	NBR1	protein_coding	bisque4	darkolivegreen
ENSG00000121060	256.929	25.1968	TRIM25	protein_coding	bisque4	darkolivegreen
ENSG00000071994	256.787	35.4932	PDCD2	protein_coding	bisque4	darkolivegreen
ENSG00000186866	255.485	81.362	POFUT2	processed_transcript	bisque4	darkolivegreen
ENSG00000177000	254.958	121.757	MTHFR	protein_coding	bisque4	darkolivegreen
ENSG00000256053	254.398	22.5023	APOPT1	protein_coding	bisque4	darkolivegreen
ENSG00000113108	253.654	25.1177	APBB3	retained_intron	bisque4	darkolivegreen
ENSG00000214753	252.921	91.5919	HNRNPUL2	protein_coding	bisque4	darkolivegreen
ENSG00000150867	247.582	66.2952	PIP4K2A	protein_coding	bisque4	darkolivegreen
ENSG00000161204	247.103	15.6123	ABCF3	protein_coding	bisque4	darkolivegreen
ENSG00000244165	246.894	19.1305	P2RY11	protein_coding	bisque4	darkolivegreen
ENSG00000101452	246.624	8.13961	DHX35	protein_coding	bisque4	darkolivegreen
ENSG00000153179	245.621	9.31727	RASSF3	nonsense_mediated_decay	bisque4	darkolivegreen
ENSG00000143799	245.323	63.3417	PARP1	protein_coding	bisque4	darkolivegreen
ENSG00000261490	245.25	2.32161	RP11-448G15.3	sense_overlapping	bisque4	darkolivegreen
ENSG00000197818	245.009	138.296	SLC9A8	protein_coding	bisque4	darkolivegreen
ENSG00000103544	242.066	47.1505	C16orf62	protein_coding	bisque4	darkolivegreen
ENSG00000187531	240.011	49.7859	SIRT7	retained_intron	bisque4	darkolivegreen
ENSG00000177119	238.492	12.4769	ANO6	processed_transcript	bisque4	darkolivegreen
ENSG00000119616	238.358	56.5484	FCF1	protein_coding	bisque4	darkolivegreen
ENSG00000105321	237.244	119.167	CCDC9	processed_transcript	bisque4	darkolivegreen
ENSG00000116337	236.867	75.3198	AMPD2	protein_coding	bisque4	darkolivegreen
ENSG00000167676	235.356	41.4312	PLIN4	protein_coding	bisque4	darkolivegreen
ENSG00000270647	234.41	31.5792	TAF15	retained_intron	bisque4	darkolivegreen
ENSG00000100888	234.261	18.344	CHD8	protein_coding	bisque4	darkolivegreen
ENSG00000163354	233.954	1.86407	DCST2	nonsense_mediated_decay	bisque4	darkolivegreen
ENSG00000012963	233.57	47.9004	UBR7	protein_coding	bisque4	darkolivegreen
ENSG00000261371	233.497	4.12287	PECAM1	protein_coding	bisque4	darkolivegreen
ENSG00000159063	231.775	34.2326	ALG8	protein_coding	bisque4	darkolivegreen
ENSG00000125166	231.538	25.0479	GOT2	protein_coding	bisque4	darkolivegreen
ENSG00000119929	230.25	70.739	CUTC	processed_transcript	bisque4	darkolivegreen
ENSG00000089050	227.777	58.4988	RBBP9	protein_coding	bisque4	darkolivegreen
ENSG00000006118	227.408	35.003	TMEM132A	processed_transcript	bisque4	darkolivegreen
ENSG00000109063	227.387	9.87835	MYH3	retained_intron	bisque4	darkolivegreen
ENSG00000115561	226.701	28.3439	CHMP3	protein_coding	bisque4	darkolivegreen
ENSG00000162384	226.559	55.0753	C1orf123	protein_coding	bisque4	darkolivegreen
ENSG00000118655	223.403	6.1495	DCLRE1B	protein_coding	bisque4	darkolivegreen
ENSG00000155287	222.301	17.3621	SLC25A28	protein_coding	bisque4	darkolivegreen
ENSG00000087263	218.004	33.0493	OGFOD1	protein_coding	bisque4	darkolivegreen
ENSG00000171307	217.649	53.9218	ZDHHC16	protein_coding	bisque4	darkolivegreen
ENSG00000136878	217.41	19.037	USP20	processed_transcript	bisque4	darkolivegreen
ENSG00000260196	215.235	65.1281	RP1-239B22.5	antisense	bisque4	darkolivegreen
ENSG00000101751	214.408	20.1812	POLI	protein_coding	bisque4	darkolivegreen
ENSG00000231721	213.359	46.5272	LINC-PINT	antisense	bisque4	darkolivegreen
ENSG00000005379	211.655	17.3779	BZRAP1	retained_intron	bisque4	darkolivegreen
ENSG00000106554	211	52.4846	CHCHD3	protein_coding	bisque4	darkolivegreen
ENSG00000129351	210.098	106.351	ILF3	retained_intron	bisque4	darkolivegreen
ENSG00000153790	209.433	18.7946	C7orf31	protein_coding	bisque4	darkolivegreen
ENSG00000151702	208.664	85.2542	FLI1	nonsense_mediated_decay	bisque4	darkolivegreen
ENSG00000144589	208.295	51.8985	STK11IP	protein_coding	bisque4	darkolivegreen
ENSG00000197976	207.775	40.573	AKAP17A	protein_coding	bisque4	darkolivegreen
ENSG00000186010	207.007	6.94821	NDUFA13	nonsense_mediated_decay	bisque4	darkolivegreen
ENSG00000136807	205.262	73.1719	CDK9	protein_coding	bisque4	darkolivegreen
ENSG00000170632	204.686	88.7269	ARMC10	protein_coding	bisque4	darkolivegreen
ENSG00000173473	204.563	34.6872	SMARCC1	protein_coding	bisque4	darkolivegreen
ENSG00000163933	203.143	54.9073	RFT1	protein_coding	bisque4	darkolivegreen
ENSG00000166260	201.966	66.2198	COX11	nonsense_mediated_decay	bisque4	darkolivegreen
ENSG00000147454	201.878	56.489	SLC25A37	protein_coding	bisque4	darkolivegreen
ENSG00000184163	201.527	30.937	FAM132A	retained_intron	bisque4	darkolivegreen
ENSG00000247121	201.088	20.3493	CTD-2260A17.2	antisense	bisque4	darkolivegreen
ENSG00000229598	199.974	11.0776	PRDX3P1	processed_pseudogene	bisque4	darkolivegreen
ENSG00000150768	198.517	91.49	DLAT	protein_coding	bisque4	darkolivegreen
ENSG00000185359	198.398	98.4772	HGS	protein_coding	bisque4	darkolivegreen
ENSG00000135457	197.581	138.076	TFCP2	protein_coding	bisque4	darkolivegreen
ENSG00000100462	196.757	58.6113	PRMT5	protein_coding	bisque4	darkolivegreen
ENSG00000272821	194.531	8.13273	CTA-384D8.36	antisense	bisque4	darkolivegreen
ENSG00000165675	193.961	67.2863	ENOX2	protein_coding	bisque4	darkolivegreen
ENSG00000185808	193.536	3.46477	PIGP	protein_coding	bisque4	darkolivegreen
ENSG00000070444	192.349	71.5082	MNT	protein_coding	bisque4	darkolivegreen
ENSG00000112511	192.243	125.237	PHF1	protein_coding	bisque4	darkolivegreen
ENSG00000087157	191.759	64.9617	PGS1	protein_coding	bisque4	darkolivegreen
ENSG00000136932	191.272	50.1387	C9orf156	protein_coding	bisque4	darkolivegreen
ENSG00000181790	188.338	2.25063	BAI1	protein_coding	bisque4	darkolivegreen
ENSG00000272667	188.02	5.56389	RP11-395A13.2	lincRNA	bisque4	darkolivegreen
ENSG00000169740	186.959	58.9717	ZNF32	protein_coding	bisque4	darkolivegreen
ENSG00000273253	186.508	18.453	RP3-402G11.26	lincRNA	bisque4	darkolivegreen
ENSG00000275131	185.608	43.4805	CH17-472G23.4	unprocessed_pseudogene	bisque4	darkolivegreen
ENSG00000115170	183.17	8.06622	ACVR1	protein_coding	bisque4	darkolivegreen
ENSG00000077150	182.538	72.5546	NFKB2	processed_transcript	bisque4	darkolivegreen
ENSG00000174945	180.08	24.028	AMZ1	protein_coding	bisque4	darkolivegreen
ENSG00000171862	179.205	81.0815	PTEN	protein_coding	bisque4	darkolivegreen
ENSG00000272669	178.773	31.6729	RP3-508I15.21	antisense	bisque4	darkolivegreen
ENSG00000119711	178.166	39.0585	ALDH6A1	protein_coding	bisque4	darkolivegreen
ENSG00000124251	177.114	35.5977	TP53TG5	protein_coding	bisque4	darkolivegreen
ENSG00000150776	176.337	28.6003	C11orf57	protein_coding	bisque4	darkolivegreen
ENSG00000168792	174.372	34.0248	ABHD15	protein_coding	bisque4	darkolivegreen
ENSG00000122223	174.313	41.3203	CD244	protein_coding	bisque4	darkolivegreen
ENSG00000118855	174.156	9.74837	MFSD1	protein_coding	bisque4	darkolivegreen
ENSG00000129675	173.639	61.9062	ARHGEF6	protein_coding	bisque4	darkolivegreen
ENSG00000139597	173.594	65.4483	N4BP2L1	protein_coding	bisque4	darkolivegreen
ENSG00000161904	173.594	104.471	LEMD2	protein_coding	bisque4	darkolivegreen
ENSG00000164048	173.483	1.63119	ZNF589	protein_coding	bisque4	darkolivegreen
ENSG00000140829	173.318	89.1652	DHX38	protein_coding	bisque4	darkolivegreen
ENSG00000177169	172.881	63.7556	ULK1	protein_coding	bisque4	darkolivegreen
ENSG00000152642	170.881	42.3842	GPD1L	protein_coding	bisque4	darkolivegreen
ENSG00000225828	170.587	46.2963	FAM229A	protein_coding	bisque4	darkolivegreen
ENSG00000234585	170.514	1.9929	CCT6P3	retained_intron	bisque4	darkolivegreen
ENSG00000181610	169.993	93.7205	MRPS23	protein_coding	bisque4	darkolivegreen
ENSG00000155256	169.826	100.838	ZFYVE27	protein_coding	bisque4	darkolivegreen
ENSG00000075702	165.513	24.3895	WDR62	processed_transcript	bisque4	darkolivegreen
ENSG00000106049	164.625	44.3631	HIBADH	protein_coding	bisque4	darkolivegreen
ENSG00000172977	164.497	117.195	KAT5	protein_coding	bisque4	darkolivegreen
ENSG00000136628	164.355	142.392	EPRS	protein_coding	bisque4	darkolivegreen
ENSG00000185189	163.462	10.1122	NRBP2	retained_intron	bisque4	darkolivegreen
ENSG00000265806	159.745	1.57737	MIR4292	miRNA	bisque4	darkolivegreen
ENSG00000149591	159.58	4.35298	TAGLN	protein_coding	bisque4	darkolivegreen
ENSG00000212743	158.387	18.9331	RP11-563J2.3	lincRNA	bisque4	darkolivegreen
ENSG00000038358	158.135	32.5343	EDC4	protein_coding	bisque4	darkolivegreen
ENSG00000114999	157.126	73.5157	TTL	protein_coding	bisque4	darkolivegreen
ENSG00000073584	157.03	11.029	SMARCE1	protein_coding	bisque4	darkolivegreen
ENSG00000168237	154.991	9.51551	GLYCTK	protein_coding	bisque4	darkolivegreen
ENSG00000159917	154.3	18.5569	ZNF235	nonsense_mediated_decay	bisque4	darkolivegreen
ENSG00000112992	153.77	117.225	NNT	protein_coding	bisque4	darkolivegreen
ENSG00000166452	153.741	56.4134	AKIP1	protein_coding	bisque4	darkolivegreen
ENSG00000244479	153.535	19.3083	OR2A1-AS1	antisense	bisque4	darkolivegreen
ENSG00000016864	153.374	163.947	GLT8D1	protein_coding	bisque4	darkolivegreen
ENSG00000042062	153.014	24.6858	FAM65C	protein_coding	bisque4	darkolivegreen
ENSG00000131374	152.937	17.3167	TBC1D5	protein_coding	bisque4	darkolivegreen
ENSG00000168904	152.531	4.57977	LRRC28	protein_coding	bisque4	darkolivegreen
ENSG00000119703	152.081	0.83329	ZC2HC1C	protein_coding	bisque4	darkolivegreen
ENSG00000108561	151.426	36.3007	C1QBP	protein_coding	bisque4	darkolivegreen
ENSG00000125354	151.221	24.4196	2006-09-01	protein_coding	bisque4	darkolivegreen
ENSG00000068796	151.135	16.8613	KIF2A	protein_coding	bisque4	darkolivegreen
ENSG00000122729	149.263	35.9057	ACO1	protein_coding	bisque4	darkolivegreen
ENSG00000116005	147.671	66.4627	PCYOX1	protein_coding	bisque4	darkolivegreen
ENSG00000141644	147.305	91.4139	MBD1	protein_coding	bisque4	darkolivegreen
ENSG00000185414	146.635	38.3866	MRPL30	protein_coding	bisque4	darkolivegreen
ENSG00000146833	146.357	4.89055	TRIM4	protein_coding	bisque4	darkolivegreen
ENSG00000131844	145.792	103.407	MCCC2	nonsense_mediated_decay	bisque4	darkolivegreen
ENSG00000248996	144.173	73.8799	RP11-1334A24.6	antisense	bisque4	darkolivegreen
ENSG00000163626	143.698	31.2939	COX18	protein_coding	bisque4	darkolivegreen
ENSG00000266891	143.631	4.69766	RP11-692N5.2	processed_pseudogene	bisque4	darkolivegreen
ENSG00000144136	143.411	1.91061	SLC20A1	protein_coding	bisque4	darkolivegreen
ENSG00000205981	143.239	64.8403	DNAJC19	protein_coding	bisque4	darkolivegreen
ENSG00000169857	143.036	4.39742	AVEN	protein_coding	bisque4	darkolivegreen
ENSG00000074696	142.732	9.73044	PTPLAD1	protein_coding	bisque4	darkolivegreen
ENSG00000144711	140.612	175.261	IQSEC1	protein_coding	bisque4	darkolivegreen
ENSG00000213557	140.256	3.21962	RP11-240E2.2	processed_pseudogene	bisque4	darkolivegreen
ENSG00000176871	137.975	5.78415	WSB2	protein_coding	bisque4	darkolivegreen
ENSG00000154222	136.922	51.2273	CC2D1B	processed_transcript	bisque4	darkolivegreen
ENSG00000144029	136.721	85.1174	MRPS5	protein_coding	bisque4	darkolivegreen
ENSG00000178338	136.331	16.8812	ZNF354B	protein_coding	bisque4	darkolivegreen
ENSG00000110060	135.394	7.38909	PUS3	protein_coding	bisque4	darkolivegreen
ENSG00000120253	134.12	19.6183	NUP43	protein_coding	bisque4	darkolivegreen
ENSG00000224195	133.842	2.33845	RP11-574K11.5	antisense	bisque4	darkolivegreen
ENSG00000260401	133.485	2.38866	RP11-800A3.4	sense_overlapping	bisque4	darkolivegreen
ENSG00000164877	133.02	25.1042	MICALL2	retained_intron	bisque4	darkolivegreen
ENSG00000018510	132.873	24.1647	AGPS	protein_coding	bisque4	darkolivegreen
ENSG00000100836	132.548	10.5183	PABPN1	protein_coding	bisque4	darkolivegreen
ENSG00000136261	132.524	60.6673	BZW2	protein_coding	bisque4	darkolivegreen
ENSG00000153774	132.381	9.7561	CFDP1	processed_transcript	bisque4	darkolivegreen
ENSG00000134815	131.802	72.6345	DHX34	protein_coding	bisque4	darkolivegreen
ENSG00000176986	130.941	67.4839	SEC24C	nonsense_mediated_decay	bisque4	darkolivegreen
ENSG00000138796	129.606	49.3945	HADH	protein_coding	bisque4	darkolivegreen
ENSG00000175387	128.59	83.0335	SMAD2	protein_coding	bisque4	darkolivegreen
ENSG00000175564	128.57	1.38476	UCP3	protein_coding	bisque4	darkolivegreen
ENSG00000100024	127.345	43.7839	UPB1	nonsense_mediated_decay	bisque4	darkolivegreen
ENSG00000230581	126.945	47.9657	ACTG1P14	processed_pseudogene	bisque4	darkolivegreen
ENSG00000109220	126.849	16.0811	CHIC2	protein_coding	bisque4	darkolivegreen
ENSG00000115598	124.744	7.36514	IL1RL2	protein_coding	bisque4	darkolivegreen
ENSG00000259717	124.238	7.90109	LINC00677	lincRNA	bisque4	darkolivegreen
ENSG00000147439	123.977	115.497	BIN3	protein_coding	bisque4	darkolivegreen
ENSG00000215256	122.899	62.4269	DHRS4-AS1	antisense	bisque4	darkolivegreen
ENSG00000134070	122.852	86.4554	IRAK2	protein_coding	bisque4	darkolivegreen
ENSG00000132780	120.113	47.464	NASP	protein_coding	bisque4	darkolivegreen
ENSG00000144283	119.973	16.9738	PKP4	nonsense_mediated_decay	bisque4	darkolivegreen
ENSG00000176641	119.671	60.2602	RNF152	protein_coding	bisque4	darkolivegreen
ENSG00000181027	119.476	35.1629	FKRP	processed_transcript	bisque4	darkolivegreen
ENSG00000165688	118.68	96.9639	PMPCA	protein_coding	bisque4	darkolivegreen
ENSG00000184992	117.287	71.8361	BRI3BP	protein_coding	bisque4	darkolivegreen
ENSG00000144401	114.565	12.9238	METTL21A	protein_coding	bisque4	darkolivegreen
ENSG00000122884	114.239	33.2945	P4HA1	protein_coding	bisque4	darkolivegreen
ENSG00000103496	113.791	43.1859	STX4	protein_coding	bisque4	darkolivegreen
ENSG00000149474	112.787	89.1131	CSRP2BP	protein_coding	bisque4	darkolivegreen
ENSG00000138430	112.634	23.9606	OLA1	protein_coding	bisque4	darkolivegreen
ENSG00000154832	111.983	13.8105	CXXC1	protein_coding	bisque4	darkolivegreen
ENSG00000173762	111.141	68.9415	CD7	protein_coding	bisque4	darkolivegreen
ENSG00000159055	110.007	26.6702	MIS18A	protein_coding	bisque4	darkolivegreen
ENSG00000154920	109.324	30.4205	EME1	protein_coding	bisque4	darkolivegreen
ENSG00000280195	107.051	5.77208	XX-FW83563B9.5	TEC	bisque4	darkolivegreen
ENSG00000138175	106.636	10.4468	ARL3	protein_coding	bisque4	darkolivegreen
ENSG00000154473	106.592	22.4233	BUB3	protein_coding	bisque4	darkolivegreen
ENSG00000163322	105.891	8.71197	FAM175A	protein_coding	bisque4	darkolivegreen
ENSG00000137409	105.77	138.234	MTCH1	protein_coding	bisque4	darkolivegreen
ENSG00000141503	104.962	57.8804	MINK1	protein_coding	bisque4	darkolivegreen
ENSG00000158545	104.498	45.8055	ZC3H18	protein_coding	bisque4	darkolivegreen
ENSG00000146904	104.331	35.1213	EPHA1	processed_transcript	bisque4	darkolivegreen
ENSG00000204920	103.8	0.763079	ZNF155	protein_coding	bisque4	darkolivegreen
ENSG00000149657	103.167	6.63165	LSM14B	protein_coding	bisque4	darkolivegreen
ENSG00000151876	102.111	39.9205	FBXO4	nonsense_mediated_decay	bisque4	darkolivegreen
ENSG00000185883	101.476	17.6389	ATP6V0C	protein_coding	bisque4	darkolivegreen
ENSG00000182973	100.089	118.042	CNOT10	protein_coding	bisque4	darkolivegreen
ENSG00000277449	98.6196	5.53442	CEBPB-AS1	antisense	bisque4	darkolivegreen
ENSG00000153936	96.8556	58.3148	HS2ST1	protein_coding	bisque4	darkolivegreen
ENSG00000142892	96.3476	18.1554	PIGK	protein_coding	bisque4	darkolivegreen
ENSG00000123136	94.8682	49.7583	DDX39A	retained_intron	bisque4	darkolivegreen
ENSG00000099251	94.7492	2.50462	HSD17B7P2	processed_transcript	bisque4	darkolivegreen
ENSG00000080503	94.2521	68.1685	SMARCA2	protein_coding	bisque4	darkolivegreen
ENSG00000157992	94.2482	0.591294	KRTCAP3	protein_coding	bisque4	darkolivegreen
ENSG00000157593	92.0679	22.678	SLC35B2	processed_transcript	bisque4	darkolivegreen
ENSG00000073169	91.7203	44.6417	SELO	protein_coding	bisque4	darkolivegreen
ENSG00000178425	90.7943	51.0344	NT5DC1	protein_coding	bisque4	darkolivegreen
ENSG00000204344	89.4816	80.2946	STK19	retained_intron	bisque4	darkolivegreen
ENSG00000206527	87.9794	41.561	PTPLB	processed_transcript	bisque4	darkolivegreen
ENSG00000167397	87.6523	3.69259	VKORC1	protein_coding	bisque4	darkolivegreen
ENSG00000187601	87.0282	50.9737	MAGEH1	protein_coding	bisque4	darkolivegreen
ENSG00000130363	86.8345	37.7087	RSPH3	protein_coding	bisque4	darkolivegreen
ENSG00000117481	86.3314	66.3439	NSUN4	protein_coding	bisque4	darkolivegreen
ENSG00000223891	86.313	17.7781	OSER1-AS1	lincRNA	bisque4	darkolivegreen
ENSG00000242802	85.4684	58.5743	AP5Z1	protein_coding	bisque4	darkolivegreen
ENSG00000217801	85.448	110.846	RP11-465B22.3	processed_transcript	bisque4	darkolivegreen
ENSG00000235488	84.6507	1.10579	JARID2-AS1	antisense	bisque4	darkolivegreen
ENSG00000182541	84.5193	66.9534	LIMK2	retained_intron	bisque4	darkolivegreen
ENSG00000169955	83.126	47.186	ZNF747	protein_coding	bisque4	darkolivegreen
ENSG00000269271	82.132	12.8091	CTB-83J4.2	lincRNA	bisque4	darkolivegreen
ENSG00000077713	81.7205	20.6986	SLC25A43	protein_coding	bisque4	darkolivegreen
ENSG00000173226	81.5687	1.6779	IQCB1	protein_coding	bisque4	darkolivegreen
ENSG00000129749	80.7241	11.2745	CHRNA10	protein_coding	bisque4	darkolivegreen
ENSG00000170638	79.0821	56.7892	TRABD	protein_coding	bisque4	darkolivegreen
ENSG00000103249	78.3487	16.9183	CLCN7	retained_intron	bisque4	darkolivegreen
ENSG00000264538	75.3193	17.0112	SUZ12P1	processed_transcript	bisque4	darkolivegreen
ENSG00000198890	75.2316	18.6948	PRMT6	protein_coding	bisque4	darkolivegreen
ENSG00000061794	74.9362	47.5296	MRPS35	protein_coding	bisque4	darkolivegreen
ENSG00000204104	74.126	62.7434	TRAF3IP1	protein_coding	bisque4	darkolivegreen
ENSG00000091157	72.8134	6.24031	WDR7	protein_coding	bisque4	darkolivegreen
ENSG00000164603	72.7484	70.5658	C7orf60	protein_coding	bisque4	darkolivegreen
ENSG00000267288	71.4316	3.07896	RP13-890H12.2	antisense	bisque4	darkolivegreen
ENSG00000123106	70.3197	24.9662	CCDC91	protein_coding	bisque4	darkolivegreen
ENSG00000177189	69.8214	46.4432	RPS6KA3	protein_coding	bisque4	darkolivegreen
ENSG00000107816	69.7717	28.5013	LZTS2	protein_coding	bisque4	darkolivegreen
ENSG00000167272	69.6283	35.8098	POP5	protein_coding	bisque4	darkolivegreen
ENSG00000099901	69.1431	35.4828	RANBP1	protein_coding	bisque4	darkolivegreen
ENSG00000261353	68.9212	4.64141	CTA-14H9.5	lincRNA	bisque4	darkolivegreen
ENSG00000164574	68.8745	4.97802	GALNT10	protein_coding	bisque4	darkolivegreen
ENSG00000178026	66.1574	8.21599	LRRC75B	protein_coding	bisque4	darkolivegreen
ENSG00000157873	65.74	29.8844	TNFRSF14	protein_coding	bisque4	darkolivegreen
ENSG00000115112	65.6458	3.74025	TFCP2L1	protein_coding	bisque4	darkolivegreen
ENSG00000085982	65.2225	1.31417	USP40	retained_intron	bisque4	darkolivegreen
ENSG00000075399	64.5887	9.53674	VPS9D1	protein_coding	bisque4	darkolivegreen
ENSG00000158850	63.8017	45.2307	B4GALT3	protein_coding	bisque4	darkolivegreen
ENSG00000177548	63.6833	19.796	RABEP2	protein_coding	bisque4	darkolivegreen
ENSG00000267106	62.2109	5.36908	ZNF561-AS1	antisense	bisque4	darkolivegreen
ENSG00000112357	62.0907	4.40159	PEX7	protein_coding	bisque4	darkolivegreen
ENSG00000121892	61.3727	14.478	PDS5A	protein_coding	bisque4	darkolivegreen
ENSG00000261428	60.9605	5.48234	RP11-16P6.1	antisense	bisque4	darkolivegreen
ENSG00000124570	59.5494	7.44181	SERPINB6	protein_coding	bisque4	darkolivegreen
ENSG00000146094	59.1113	95.0796	DOK3	protein_coding	bisque4	darkolivegreen
ENSG00000235313	59.0791	22.094	HM13-IT1	sense_intronic	bisque4	darkolivegreen
ENSG00000173275	58.9604	21.1469	ZNF449	protein_coding	bisque4	darkolivegreen
ENSG00000112685	58.3227	5.35958	EXOC2	protein_coding	bisque4	darkolivegreen
ENSG00000177406	57.9138	29.9075	RP11-218M22.1	antisense	bisque4	darkolivegreen
ENSG00000204618	56.7864	14.483	RNF39	protein_coding	bisque4	darkolivegreen
ENSG00000158467	56.0485	68.7469	AHCYL2	protein_coding	bisque4	darkolivegreen
ENSG00000187630	55.6473	11.1784	DHRS4L2	protein_coding	bisque4	darkolivegreen
ENSG00000147586	55.465	11.257	MRPS28	protein_coding	bisque4	darkolivegreen
ENSG00000178301	54.9603	9.49556	AQP11	processed_transcript	bisque4	darkolivegreen
ENSG00000010219	54.6571	20.5012	DYRK4	protein_coding	bisque4	darkolivegreen
ENSG00000220785	54.5731	22.1985	MTMR9LP	processed_transcript	bisque4	darkolivegreen
ENSG00000159496	54.5145	44.7547	RGL4	nonsense_mediated_decay	bisque4	darkolivegreen
ENSG00000066651	54.193	3.31718	TRMT11	nonsense_mediated_decay	bisque4	darkolivegreen
ENSG00000107669	53.6803	85.3883	ATE1	protein_coding	bisque4	darkolivegreen
ENSG00000108405	52.9827	8.20568	P2RX1	retained_intron	bisque4	darkolivegreen
ENSG00000131788	52.7229	15.9585	PIAS3	retained_intron	bisque4	darkolivegreen
ENSG00000226419	52.38	10.867	SLC16A1-AS1	antisense	bisque4	darkolivegreen
ENSG00000089060	50.586	23.6311	SLC8B1	protein_coding	bisque4	darkolivegreen
ENSG00000169032	48.3667	4.12587	MAP2K1	protein_coding	bisque4	darkolivegreen
ENSG00000147905	48.25	72.9892	ZCCHC7	protein_coding	bisque4	darkolivegreen
ENSG00000047230	47.7229	45.2064	CTPS2	protein_coding	bisque4	darkolivegreen
ENSG00000159842	47.0475	49.0768	ABR	protein_coding	bisque4	darkolivegreen
ENSG00000156017	46.3486	87.1431	C9orf41	protein_coding	bisque4	darkolivegreen
ENSG00000145743	46.2305	10.1441	FBXL17	protein_coding	bisque4	darkolivegreen
ENSG00000100991	46.1934	35.4848	TRPC4AP	protein_coding	bisque4	darkolivegreen
ENSG00000235674	45.9358	15.0962	LDHAP2	processed_pseudogene	bisque4	darkolivegreen
ENSG00000158941	44.843	145.35	CCAR2	protein_coding	bisque4	darkolivegreen
ENSG00000179826	44.7429	3.53601	MRGPRX3	protein_coding	bisque4	darkolivegreen
ENSG00000154822	44.0223	3.33226	PLCL2	processed_transcript	bisque4	darkolivegreen
ENSG00000105708	43.973	0.678871	ZNF14	protein_coding	bisque4	darkolivegreen
ENSG00000279406	43.7504	15.3637	RP11-327E2.5	TEC	bisque4	darkolivegreen
ENSG00000113719	43.3905	30.9356	ERGIC1	protein_coding	bisque4	darkolivegreen
ENSG00000203879	43.1182	72.7036	GDI1	protein_coding	bisque4	darkolivegreen
ENSG00000159023	42.3266	6.28513	EPB41	processed_transcript	bisque4	darkolivegreen
ENSG00000168758	41.8647	28.0187	SEMA4C	protein_coding	bisque4	darkolivegreen
ENSG00000280020	41.7158	27.0042	CTD-2095E4.4	TEC	bisque4	darkolivegreen
ENSG00000157734	39.9709	20.0077	SNX22	retained_intron	bisque4	darkolivegreen
ENSG00000133740	39.2656	2.18321	E2F5	protein_coding	bisque4	darkolivegreen
ENSG00000138617	38.7036	23.9904	PARP16	nonsense_mediated_decay	bisque4	darkolivegreen
ENSG00000101868	38.6996	17.3836	POLA1	protein_coding	bisque4	darkolivegreen
ENSG00000248333	36.662	31.3731	CDK11B	protein_coding	bisque4	darkolivegreen
ENSG00000009335	35.6562	17.6517	UBE3C	protein_coding	bisque4	darkolivegreen
ENSG00000162341	35.5059	33.6527	TPCN2	protein_coding	bisque4	darkolivegreen
ENSG00000128039	35.2489	1.23779	SRD5A3	protein_coding	bisque4	darkolivegreen
ENSG00000145833	35.1589	42.2165	DDX46	nonsense_mediated_decay	bisque4	darkolivegreen
ENSG00000052841	34.3583	81.6044	TTC17	protein_coding	bisque4	darkolivegreen
ENSG00000127080	33.8248	23.5583	IPPK	protein_coding	bisque4	darkolivegreen
ENSG00000155906	32.8478	22.1088	RMND1	protein_coding	bisque4	darkolivegreen
ENSG00000182405	32.4401	10.2544	PGBD4	protein_coding	bisque4	darkolivegreen
ENSG00000269990	30.5827	9.8671	CTD-3074O7.12	lincRNA	bisque4	darkolivegreen
ENSG00000028310	30.4613	62.3972	BRD9	retained_intron	bisque4	darkolivegreen
ENSG00000138640	29.8926	24.619	FAM13A	protein_coding	bisque4	darkolivegreen
ENSG00000168556	29.2665	8.23718	ING2	protein_coding	bisque4	darkolivegreen
ENSG00000165915	28.1089	28.3568	SLC39A13	protein_coding	bisque4	darkolivegreen
ENSG00000005700	27.7597	54.1877	IBTK	protein_coding	bisque4	darkolivegreen
ENSG00000134146	27.3979	6.38344	DPH6	processed_transcript	bisque4	darkolivegreen
ENSG00000141447	27.1177	4.25084	OSBPL1A	protein_coding	bisque4	darkolivegreen
ENSG00000272825	26.8658	2.94389	LL21NC02-1C16.2	antisense	bisque4	darkolivegreen
ENSG00000181982	25.7268	13.2788	CCDC149	protein_coding	bisque4	darkolivegreen
ENSG00000276171	25.4536	0.967951	AC114498.1	miRNA	bisque4	darkolivegreen
ENSG00000131187	25.2296	3.60804	F12	protein_coding	bisque4	darkolivegreen
ENSG00000214456	24.1193	25.3985	PLIN5	protein_coding	bisque4	darkolivegreen
ENSG00000107833	23.7539	3.72806	NPM3	protein_coding	bisque4	darkolivegreen
ENSG00000166501	23.6847	3.19519	PRKCB	protein_coding	bisque4	darkolivegreen
ENSG00000154059	23.1565	37.7285	IMPACT	protein_coding	bisque4	darkolivegreen
ENSG00000171469	22.799	13.1971	ZNF561	nonsense_mediated_decay	bisque4	darkolivegreen
ENSG00000126249	21.1643	12.8462	PDCD2L	protein_coding	bisque4	darkolivegreen
ENSG00000171100	19.4291	12.6802	MTM1	protein_coding	bisque4	darkolivegreen
ENSG00000172765	19.1582	76.3369	TMCC1	protein_coding	bisque4	darkolivegreen
ENSG00000172731	18.3739	11.7638	LRRC20	protein_coding	bisque4	darkolivegreen
ENSG00000128829	17.7299	3.99802	EIF2AK4	protein_coding	bisque4	darkolivegreen
ENSG00000115211	16.5057	22.889	EIF2B4	protein_coding	bisque4	darkolivegreen
ENSG00000184575	15.9684	37.9283	XPOT	protein_coding	bisque4	darkolivegreen
ENSG00000107242	13.9413	2.74615	PIP5K1B	protein_coding	bisque4	darkolivegreen
ENSG00000168476	13.3274	18.0497	REEP4	protein_coding	bisque4	darkolivegreen
ENSG00000116120	12.8677	8.29331	FARSB	protein_coding	bisque4	darkolivegreen
ENSG00000176623	12.171	5.87162	RMDN1	protein_coding	bisque4	darkolivegreen
ENSG00000043514	9.13227	13.5024	TRIT1	protein_coding	bisque4	darkolivegreen
ENSG00000197971	8.91529	23.6915	MBP	protein_coding	bisque4	darkolivegreen
ENSG00000173540	8.46959	35.3401	GMPPB	protein_coding	bisque4	darkolivegreen
ENSG00000236088	6.2983	24.6964	COX10-AS1	antisense	bisque4	darkolivegreen
ENSG00000095564	541.318	32.7988	BTAF1	protein_coding	bisque4	saddlebrown
ENSG00000117360	485.555	35.5938	PRPF3	protein_coding	bisque4	saddlebrown
ENSG00000248124	456.62	13.4193	RRN3P1	processed_transcript	bisque4	saddlebrown
ENSG00000227671	436.286	17.6195	MIR3916	transcribed_unprocessed_pseudogene	bisque4	saddlebrown
ENSG00000110172	430.467	34.9993	CHORDC1	protein_coding	bisque4	saddlebrown
ENSG00000275764	429.625	22.3097	RP11-582E3.6	lincRNA	bisque4	saddlebrown
ENSG00000163867	428.61	34.3153	ZMYM6	processed_transcript	bisque4	saddlebrown
ENSG00000162601	427.086	63.3894	MYSM1	protein_coding	bisque4	saddlebrown
ENSG00000131876	426.925	38.7767	SNRPA1	protein_coding	bisque4	saddlebrown
ENSG00000145495	412.094	64.1681	MARCH6	protein_coding	bisque4	saddlebrown
ENSG00000108528	407.558	66.6036	SLC25A11	protein_coding	bisque4	saddlebrown
ENSG00000188529	403.056	54.7931	SRSF10	protein_coding	bisque4	saddlebrown
ENSG00000111011	399.801	57.5945	RSRC2	protein_coding	bisque4	saddlebrown
ENSG00000204392	398.916	20.2951	LSM2	processed_transcript	bisque4	saddlebrown
ENSG00000066427	388.919	37.853	ATXN3	protein_coding	bisque4	saddlebrown
ENSG00000082258	388.227	45.8629	CCNT2	nonsense_mediated_decay	bisque4	saddlebrown
ENSG00000163257	386.244	36.2197	DCAF16	protein_coding	bisque4	saddlebrown
ENSG00000162664	386.091	57.2272	ZNF326	nonsense_mediated_decay	bisque4	saddlebrown
ENSG00000091947	377.98	6.88982	TMEM101	protein_coding	bisque4	saddlebrown
ENSG00000136925	371.055	27.1761	TSTD2	retained_intron	bisque4	saddlebrown
ENSG00000110429	367.076	10.0721	FBXO3	protein_coding	bisque4	saddlebrown
ENSG00000125633	364.209	37.383	CCDC93	protein_coding	bisque4	saddlebrown
ENSG00000173141	361.646	39.0307	MRPL57	protein_coding	bisque4	saddlebrown
ENSG00000089916	361.442	34.8131	GPATCH2L	nonsense_mediated_decay	bisque4	saddlebrown
ENSG00000182180	355.534	30.9598	MRPS16	processed_transcript	bisque4	saddlebrown
ENSG00000239305	350.692	52.407	RNF103	protein_coding	bisque4	saddlebrown
ENSG00000114933	342.627	48.5542	INO80D	protein_coding	bisque4	saddlebrown
ENSG00000180979	341.57	1.66545	LRRC57	protein_coding	bisque4	saddlebrown
ENSG00000136541	334.688	41.9652	ERMN	protein_coding	bisque4	saddlebrown
ENSG00000132383	328.668	26.5871	RPA1	protein_coding	bisque4	saddlebrown
ENSG00000147383	322.644	3.62292	NSDHL	protein_coding	bisque4	saddlebrown
ENSG00000161542	321.324	31.5409	PRPSAP1	protein_coding	bisque4	saddlebrown
ENSG00000101247	320.165	3.16266	NDUFAF5	protein_coding	bisque4	saddlebrown
ENSG00000131473	316.884	17.1031	ACLY	protein_coding	bisque4	saddlebrown
ENSG00000115661	316.291	28.5225	STK16	protein_coding	bisque4	saddlebrown
ENSG00000241975	315.17	32.0971	TCEB1P19	processed_pseudogene	bisque4	saddlebrown
ENSG00000273284	315.03	32.6017	RP11-888D10.4	sense_intronic	bisque4	saddlebrown
ENSG00000204599	311.973	24.9375	TRIM39	protein_coding	bisque4	saddlebrown
ENSG00000165392	311.628	15.2288	WRN	protein_coding	bisque4	saddlebrown
ENSG00000165494	309.993	12.0695	PCF11	protein_coding	bisque4	saddlebrown
ENSG00000211450	309.683	29.2512	C11orf31	protein_coding	bisque4	saddlebrown
ENSG00000242689	308.599	28.7923	CNTF	protein_coding	bisque4	saddlebrown
ENSG00000206573	308.114	47.478	THUMPD3-AS1	antisense	bisque4	saddlebrown
ENSG00000112640	306.952	26.4705	PPP2R5D	protein_coding	bisque4	saddlebrown
ENSG00000167862	290.122	23.9297	ICT1	protein_coding	bisque4	saddlebrown
ENSG00000100319	282.637	19.2887	ZMAT5	protein_coding	bisque4	saddlebrown
ENSG00000276517	281.217	7.60601	AL133243.2	sense_intronic	bisque4	saddlebrown
ENSG00000033011	276.236	23.8067	ALG1	retained_intron	bisque4	saddlebrown
ENSG00000169188	265.792	30.999	APEX2	protein_coding	bisque4	saddlebrown
ENSG00000156990	265.455	49.2237	RPUSD3	protein_coding	bisque4	saddlebrown
ENSG00000169410	265.118	28.3607	PTPN9	protein_coding	bisque4	saddlebrown
ENSG00000103415	260.583	24.1057	HMOX2	protein_coding	bisque4	saddlebrown
ENSG00000129472	257.763	24.744	RAB2B	protein_coding	bisque4	saddlebrown
ENSG00000279133	257.505	28.2679	RP11-342K2.1	TEC	bisque4	saddlebrown
ENSG00000181924	257.003	14.8963	COA4	protein_coding	bisque4	saddlebrown
ENSG00000100441	255.417	31.316	KHNYN	protein_coding	bisque4	saddlebrown
ENSG00000132334	255.417	20.8809	PTPRE	protein_coding	bisque4	saddlebrown
ENSG00000262919	255.157	31.9232	FAM58A	protein_coding	bisque4	saddlebrown
ENSG00000054277	253.455	14.4014	OPN3	processed_transcript	bisque4	saddlebrown
ENSG00000167674	253.19	18.7962	HDGFRP2	protein_coding	bisque4	saddlebrown
ENSG00000130312	252.838	20.371	MRPL34	protein_coding	bisque4	saddlebrown
ENSG00000132646	252.201	23.9534	PCNA	protein_coding	bisque4	saddlebrown
ENSG00000231611	249.255	2.21969	AP006216.11	lincRNA	bisque4	saddlebrown
ENSG00000180667	248.24	4.73198	YOD1	protein_coding	bisque4	saddlebrown
ENSG00000196544	243.212	40.0658	C17orf59	protein_coding	bisque4	saddlebrown
ENSG00000122986	242.147	19.1046	HVCN1	protein_coding	bisque4	saddlebrown
ENSG00000280341	238.532	2.96956	LA16c-60D12.1	lincRNA	bisque4	saddlebrown
ENSG00000198825	232.326	6.489	INPP5F	protein_coding	bisque4	saddlebrown
ENSG00000164077	229.303	36.7082	MON1A	protein_coding	bisque4	saddlebrown
ENSG00000161526	229.094	20.7263	SAP30BP	protein_coding	bisque4	saddlebrown
ENSG00000253710	227.988	8.2065	ALG11	protein_coding	bisque4	saddlebrown
ENSG00000213073	219.729	20.9082	RP11-288H12.3	processed_transcript	bisque4	saddlebrown
ENSG00000175556	216.556	41.2334	LONRF3	nonsense_mediated_decay	bisque4	saddlebrown
ENSG00000167085	215.258	28.0976	PHB	protein_coding	bisque4	saddlebrown
ENSG00000204498	213.726	9.32297	NFKBIL1	protein_coding	bisque4	saddlebrown
ENSG00000258297	207.174	2.48219	RP11-658F2.8	antisense	bisque4	saddlebrown
ENSG00000158042	206.483	29.6489	MRPL17	protein_coding	bisque4	saddlebrown
ENSG00000272065	205.576	1.10995	U91328.20	lincRNA	bisque4	saddlebrown
ENSG00000234329	198.825	2.05628	RP11-767N6.2	processed_pseudogene	bisque4	saddlebrown
ENSG00000172269	195.1	28.1147	DPAGT1	protein_coding	bisque4	saddlebrown
ENSG00000229833	194.013	4.76496	PET100	protein_coding	bisque4	saddlebrown
ENSG00000125901	192.812	40.1044	MRPS26	protein_coding	bisque4	saddlebrown
ENSG00000247077	188.698	51.2136	PGAM5	protein_coding	bisque4	saddlebrown
ENSG00000272483	185.711	9.92923	RP11-169K17.3	antisense	bisque4	saddlebrown
ENSG00000100347	183.042	20.3151	SAMM50	protein_coding	bisque4	saddlebrown
ENSG00000277972	181.531	45.3201	CISD3	protein_coding	bisque4	saddlebrown
ENSG00000235106	180.9	18.8931	LINC00094	antisense	bisque4	saddlebrown
ENSG00000184047	172.911	24.3299	DIABLO	protein_coding	bisque4	saddlebrown
ENSG00000140263	172.4	8.05904	SORD	protein_coding	bisque4	saddlebrown
ENSG00000148300	168.265	39.2928	REXO4	protein_coding	bisque4	saddlebrown
ENSG00000140995	158.976	9.34678	DEF8	protein_coding	bisque4	saddlebrown
ENSG00000198246	158.572	12.4078	SLC29A3	protein_coding	bisque4	saddlebrown
ENSG00000005882	152.829	12.0979	PDK2	protein_coding	bisque4	saddlebrown
ENSG00000130699	144.138	15.3769	TAF4	protein_coding	bisque4	saddlebrown
ENSG00000167112	143.347	37.8834	TRUB2	protein_coding	bisque4	saddlebrown
ENSG00000135446	142.757	15.0438	CDK4	protein_coding	bisque4	saddlebrown
ENSG00000185477	138.37	7.80017	GPRIN3	protein_coding	bisque4	saddlebrown
ENSG00000167642	135.609	11.9763	SPINT2	protein_coding	bisque4	saddlebrown
ENSG00000141510	134.753	8.59541	TP53	protein_coding	bisque4	saddlebrown
ENSG00000065057	131.708	17.9701	NTHL1	protein_coding	bisque4	saddlebrown
ENSG00000059377	130.518	2.37394	TBXAS1	processed_transcript	bisque4	saddlebrown
ENSG00000113494	125.968	12.9202	PRLR	protein_coding	bisque4	saddlebrown
ENSG00000143891	125.619	7.4844	GALM	protein_coding	bisque4	saddlebrown
ENSG00000102606	119.918	29.1135	ARHGEF7	processed_transcript	bisque4	saddlebrown
ENSG00000130299	113.66	8.79184	GTPBP3	protein_coding	bisque4	saddlebrown
ENSG00000204922	113.479	9.86377	UQCC3	protein_coding	bisque4	saddlebrown
ENSG00000104998	113.207	23.9938	IL27RA	protein_coding	bisque4	saddlebrown
ENSG00000181274	112.062	12.6531	FRAT2	protein_coding	bisque4	saddlebrown
ENSG00000006756	111.444	2.14133	ARSD	protein_coding	bisque4	saddlebrown
ENSG00000259758	111.282	39.0044	CASC7	lincRNA	bisque4	saddlebrown
ENSG00000275070	107.174	0.276041	Metazoa_SRP	misc_RNA	bisque4	saddlebrown
ENSG00000089280	107.128	34.6607	FUS	protein_coding	bisque4	saddlebrown
ENSG00000162482	105.353	0.845736	AKR7A3	protein_coding	bisque4	saddlebrown
ENSG00000163517	104.527	1.54186	HDAC11	protein_coding	bisque4	saddlebrown
ENSG00000221990	94.0088	0.309802	C5orf55	antisense	bisque4	saddlebrown
ENSG00000214827	93.7625	6.00248	MTCP1	nonsense_mediated_decay	bisque4	saddlebrown
ENSG00000135617	92.7039	16.1016	PRADC1	protein_coding	bisque4	saddlebrown
ENSG00000237298	79.7141	7.10717	TTN-AS1	antisense	bisque4	saddlebrown
ENSG00000215305	79.3026	17.6676	VPS16	protein_coding	bisque4	saddlebrown
ENSG00000010244	77.7425	53.5291	ZNF207	protein_coding	bisque4	saddlebrown
ENSG00000108039	72.8643	38.059	XPNPEP1	retained_intron	bisque4	saddlebrown
ENSG00000132153	70.8648	11.3969	DHX30	retained_intron	bisque4	saddlebrown
ENSG00000123159	69.4136	2.86084	GIPC1	protein_coding	bisque4	saddlebrown
ENSG00000130332	69.2401	22.0172	LSM7	protein_coding	bisque4	saddlebrown
ENSG00000185909	68.7645	9.09189	KLHDC8B	protein_coding	bisque4	saddlebrown
ENSG00000130703	67.2518	24.4	OSBPL2	processed_transcript	bisque4	saddlebrown
ENSG00000215244	64.1847	4.24599	RP11-563J2.2	lincRNA	bisque4	saddlebrown
ENSG00000232324	63.1029	10.8244	AC008440.10	lincRNA	bisque4	saddlebrown
ENSG00000104907	62.3294	20.887	TRMT1	protein_coding	bisque4	saddlebrown
ENSG00000152256	61.7654	14.0576	PDK1	protein_coding	bisque4	saddlebrown
ENSG00000164050	60.3748	3.48731	PLXNB1	protein_coding	bisque4	saddlebrown
ENSG00000233429	58.8739	6.5803	HOTAIRM1	antisense	bisque4	saddlebrown
ENSG00000183779	53.2851	3.33259	ZNF703	protein_coding	bisque4	saddlebrown
ENSG00000249459	50.6127	5.9875	ZNF286B	protein_coding	bisque4	saddlebrown
ENSG00000163703	49.5553	13.7535	CRELD1	protein_coding	bisque4	saddlebrown
ENSG00000123427	48.1146	2.87462	METTL21B	protein_coding	bisque4	saddlebrown
ENSG00000116096	45.6719	7.37302	SPR	protein_coding	bisque4	saddlebrown
ENSG00000267796	43.7813	1.29771	LIN37	retained_intron	bisque4	saddlebrown
ENSG00000256092	42.0183	0.727179	MIR8072	lincRNA	bisque4	saddlebrown
ENSG00000241732	38.8898	8.16038	RP11-38P22.2	lincRNA	bisque4	saddlebrown
ENSG00000258944	34.4045	2.48634	RP4-647C14.3	antisense	bisque4	saddlebrown
ENSG00000214046	32.5409	2.96888	SMIM7	processed_transcript	bisque4	saddlebrown
ENSG00000100726	31.1076	13.0847	TELO2	nonsense_mediated_decay	bisque4	saddlebrown
ENSG00000161217	25.3814	18.1883	PCYT1A	protein_coding	bisque4	saddlebrown
ENSG00000142046	15.1719	2.08495	TMEM91	protein_coding	bisque4	saddlebrown
ENSG00000130244	14.3381	24.0812	FAM98C	protein_coding	bisque4	saddlebrown
ENSG00000160883	13.7962	21.2282	HK3	retained_intron	bisque4	saddlebrown
ENSG00000174749	7.54133	9.34508	C4orf32	protein_coding	bisque4	saddlebrown
ENSG00000167302	484.813	20.7005	ENTHD2	retained_intron	bisque4	green
ENSG00000269352	476.967	11.6865	AC018766.5	antisense	bisque4	green
ENSG00000168970	459.007	39.311	JMJD7-PLA2G4B	retained_intron	bisque4	green
ENSG00000255031	453.267	24.0354	RP11-802E16.3	antisense	bisque4	green
ENSG00000100416	449.749	18.4437	TRMU	processed_transcript	bisque4	green
ENSG00000184465	430.885	22.2309	WDR27	processed_transcript	bisque4	green
ENSG00000112659	430.281	35.4382	CUL9	protein_coding	bisque4	green
ENSG00000138834	412.017	33.3145	MAPK8IP3	protein_coding	bisque4	green
ENSG00000146067	407.256	26.6402	FAM193B	protein_coding	bisque4	green
ENSG00000137070	400.768	21.3836	IL11RA	protein_coding	bisque4	green
ENSG00000185513	395.991	26.4637	L3MBTL1	protein_coding	bisque4	green
ENSG00000223959	393.05	7.68212	AFG3L1P	processed_transcript	bisque4	green
ENSG00000215375	389.289	24.7074	MYL5	protein_coding	bisque4	green
ENSG00000274272	380.908	36.5379	RP11-44M6.7	retained_intron	bisque4	green
ENSG00000177084	364.418	27.2572	POLE	retained_intron	bisque4	green
ENSG00000176155	361.579	6.71867	CCDC57	processed_transcript	bisque4	green
ENSG00000101104	360.67	24.2065	PABPC1L	protein_coding	bisque4	green
ENSG00000254419	359.719	7.62541	RP11-261P9.4	sense_intronic	bisque4	green
ENSG00000142552	358.928	29.1363	RCN3	protein_coding	bisque4	green
ENSG00000161996	350.003	24.0776	WDR90	retained_intron	bisque4	green
ENSG00000215440	348.705	32.1747	NPEPL1	protein_coding	bisque4	green
ENSG00000162572	346.816	9.80753	SCNN1D	protein_coding	bisque4	green
ENSG00000073605	344.865	14.1179	GSDMB	retained_intron	bisque4	green
ENSG00000243696	344.595	3.29124	RP5-966M1.6	nonsense_mediated_decay	bisque4	green
ENSG00000114270	343.835	13.5091	COL7A1	processed_transcript	bisque4	green
ENSG00000167702	340.234	26.1848	KIFC2	protein_coding	bisque4	green
ENSG00000158062	334.041	9.51596	UBXN11	protein_coding	bisque4	green
ENSG00000136240	328.868	16.0837	KDELR2	processed_transcript	bisque4	green
ENSG00000134285	323.58	12.5969	FKBP11	retained_intron	bisque4	green
ENSG00000151006	322.841	8.29216	PRSS53	protein_coding	bisque4	green
ENSG00000131584	319.487	37.981	ACAP3	protein_coding	bisque4	green
ENSG00000108515	312.634	13.0766	ENO3	protein_coding	bisque4	green
ENSG00000197774	311.951	8.91347	EME2	protein_coding	bisque4	green
ENSG00000205702	301.715	12.7107	CYP2D7P	nonsense_mediated_decay	bisque4	green
ENSG00000177943	300.442	33.6386	MAMDC4	processed_transcript	bisque4	green
ENSG00000005206	300.064	39.131	SPPL2B	processed_transcript	bisque4	green
ENSG00000087302	296.46	29.0512	C14orf166	protein_coding	bisque4	green
ENSG00000102878	296.021	11.5535	HSF4	retained_intron	bisque4	green
ENSG00000239779	294.07	10.1675	WBP1	protein_coding	bisque4	green
ENSG00000228784	293.96	9.61404	LINC00954	lincRNA	bisque4	green
ENSG00000176248	292.871	33.3735	ANAPC2	retained_intron	bisque4	green
ENSG00000104960	287.911	32.3111	PTOV1	protein_coding	bisque4	green
ENSG00000160781	273.111	3.70232	PAQR6	processed_transcript	bisque4	green
ENSG00000132792	269.089	11.3154	CTNNBL1	protein_coding	bisque4	green
ENSG00000108465	266.881	16.8529	CDK5RAP3	protein_coding	bisque4	green
ENSG00000104852	263.771	30.8732	SNRNP70	nonsense_mediated_decay	bisque4	green
ENSG00000044115	260.754	3.11535	CTNNA1	protein_coding	bisque4	green
ENSG00000204859	254.708	31.7646	ZBTB48	protein_coding	bisque4	green
ENSG00000108799	253.819	11.2284	EZH1	protein_coding	bisque4	green
ENSG00000160796	246.83	30.025	NBEAL2	protein_coding	bisque4	green
ENSG00000188566	244.845	40.0518	NDOR1	protein_coding	bisque4	green
ENSG00000258461	242.043	8.54463	RP11-164J13.1	processed_transcript	bisque4	green
ENSG00000110274	240.566	12.0076	CEP164	protein_coding	bisque4	green
ENSG00000235316	238.403	9.44649	DUSP8P5	processed_pseudogene	bisque4	green
ENSG00000262370	236.612	2.11979	RP11-473M20.9	lincRNA	bisque4	green
ENSG00000167280	233.798	5.98734	ENGASE	nonsense_mediated_decay	bisque4	green
ENSG00000255050	219.535	5.56405	RP11-661A12.9	antisense	bisque4	green
ENSG00000160917	213.669	14.7561	CPSF4	protein_coding	bisque4	green
ENSG00000067955	211.739	39.7	CBFB	protein_coding	bisque4	green
ENSG00000179832	209.944	41.1652	MROH1	retained_intron	bisque4	green
ENSG00000105887	208.909	39.4224	MTPN	protein_coding	bisque4	green
ENSG00000105397	207.951	39.7498	TYK2	protein_coding	bisque4	green
ENSG00000092529	207.927	12.442	CAPN3	protein_coding	bisque4	green
ENSG00000122965	207.09	7.41062	RBM19	processed_transcript	bisque4	green
ENSG00000111145	202.163	7.38204	ELK3	protein_coding	bisque4	green
ENSG00000108773	197.884	17.2014	KAT2A	protein_coding	bisque4	green
ENSG00000161912	195.233	1.86073	ADCY10P1	transcribed_unprocessed_pseudogene	bisque4	green
ENSG00000228486	194.764	8.3917	LINC01125	antisense	bisque4	green
ENSG00000268575	193.403	1.04219	RP1-283E3.8	processed_transcript	bisque4	green
ENSG00000198690	189.334	2.32797	FAN1	protein_coding	bisque4	green
ENSG00000145191	187.458	3.57675	EIF2B5	retained_intron	bisque4	green
ENSG00000178922	186.083	10.534	HYI	retained_intron	bisque4	green
ENSG00000076513	183.64	6.96667	ANKRD13A	nonsense_mediated_decay	bisque4	green
ENSG00000131931	181.932	2.53497	THAP1	protein_coding	bisque4	green
ENSG00000065882	179.472	4.03132	TBC1D1	protein_coding	bisque4	green
ENSG00000256537	176.617	12.8679	RP11-785H5.1	lincRNA	bisque4	green
ENSG00000267493	174.326	16.698	CIRBP-AS1	antisense	bisque4	green
ENSG00000261207	171.974	21.3762	LA16c-361A3.3	antisense	bisque4	green
ENSG00000170035	171.146	7.24683	UBE2E3	protein_coding	bisque4	green
ENSG00000139190	167.006	2.92799	VAMP1	protein_coding	bisque4	green
ENSG00000127586	165.378	3.26189	CHTF18	retained_intron	bisque4	green
ENSG00000010327	164.076	11.4435	STAB1	protein_coding	bisque4	green
ENSG00000265982	159.522	22.7331	RP11-927P21.4	unprocessed_pseudogene	bisque4	green
ENSG00000239127	156.296	6.61808	SNORD125	snoRNA	bisque4	green
ENSG00000100445	150.018	0.831872	SDR39U1	retained_intron	bisque4	green
ENSG00000145217	148.559	4.77567	SLC26A1	protein_coding	bisque4	green
ENSG00000078814	145.687	6.9109	MYH7B	protein_coding	bisque4	green
ENSG00000229873	145.017	3.73057	OGFR-AS1	antisense	bisque4	green
ENSG00000183963	142.738	7.1863	SMTN	protein_coding	bisque4	green
ENSG00000196187	141.064	13.7315	TMEM63A	protein_coding	bisque4	green
ENSG00000180628	138.16	23.7059	PCGF5	processed_transcript	bisque4	green
ENSG00000168255	135.016	4.07111	POLR2J3	nonsense_mediated_decay	bisque4	green
ENSG00000204316	131.561	2.28751	MRPL38	protein_coding	bisque4	green
ENSG00000139651	129.954	4.38153	ZNF740	protein_coding	bisque4	green
ENSG00000262877	126.634	1.81874	RP11-1055B8.4	lincRNA	bisque4	green
ENSG00000167081	125.099	7.07937	PBX3	protein_coding	bisque4	green
ENSG00000255587	124.586	5.59496	RAB44	protein_coding	bisque4	green
ENSG00000223473	122.685	1.14907	GS1-124K5.3	lincRNA	bisque4	green
ENSG00000099840	120.578	3.09756	IZUMO4	retained_intron	bisque4	green
ENSG00000147649	120.136	33.1079	MTDH	protein_coding	bisque4	green
ENSG00000225697	117.416	15.3348	SLC26A6	protein_coding	bisque4	green
ENSG00000249115	117.257	4.57373	HAUS5	nonsense_mediated_decay	bisque4	green
ENSG00000130714	112.632	23.7137	POMT1	protein_coding	bisque4	green
ENSG00000196700	112.111	5.5997	ZNF512B	protein_coding	bisque4	green
ENSG00000110455	111.545	0.338532	ACCS	processed_transcript	bisque4	green
ENSG00000212123	106.44	4.1535	PRR22	protein_coding	bisque4	green
ENSG00000129055	106.284	12.4987	ANAPC13	protein_coding	bisque4	green
ENSG00000197182	105.823	5.00115	MIRLET7BHG	lincRNA	bisque4	green
ENSG00000183401	104.575	18.9876	CCDC159	processed_transcript	bisque4	green
ENSG00000204839	99.3894	12.5275	MROH6	protein_coding	bisque4	green
ENSG00000099889	98.4413	9.1485	ARVCF	protein_coding	bisque4	green
ENSG00000274808	96.7042	10.9194	TBC1D3B	protein_coding	bisque4	green
ENSG00000149564	91.6456	5.02982	ESAM	protein_coding	bisque4	green
ENSG00000204351	91.3266	12.3353	SKIV2L	protein_coding	bisque4	green
ENSG00000099899	90.5931	11.976	TRMT2A	protein_coding	bisque4	green
ENSG00000102001	89.7986	1.21663	CACNA1F	protein_coding	bisque4	green
ENSG00000149527	87.9084	5.61006	PLCH2	protein_coding	bisque4	green
ENSG00000196476	86.0711	3.83043	C20orf96	protein_coding	bisque4	green
ENSG00000131067	85.6627	7.26386	GGT7	protein_coding	bisque4	green
ENSG00000167535	84.8587	1.93788	CACNB3	retained_intron	bisque4	green
ENSG00000107331	84.2699	21.7953	ABCA2	protein_coding	bisque4	green
ENSG00000181666	82.8835	1.61236	HKR1	protein_coding	bisque4	green
ENSG00000065029	81.3744	9.82157	ZNF76	retained_intron	bisque4	green
ENSG00000226321	80.2938	8.22224	AC104809.3	protein_coding	bisque4	green
ENSG00000184381	79.8651	4.0247	PLA2G6	protein_coding	bisque4	green
ENSG00000127415	79.3862	33.7916	IDUA	protein_coding	bisque4	green
ENSG00000149499	77.3069	26.1942	EML3	protein_coding	bisque4	green
ENSG00000260077	74.2986	0.315711	RP11-254F7.2	lincRNA	bisque4	green
ENSG00000188747	71.118	7.62723	NOXA1	protein_coding	bisque4	green
ENSG00000185495	69.9026	12.8412	SEPT7P9	processed_transcript	bisque4	green
ENSG00000160051	68.8999	8.35564	IQCC	protein_coding	bisque4	green
ENSG00000204272	65.9919	2.80679	LINC01420	antisense	bisque4	green
ENSG00000106976	64.87	1.55769	DNM1	protein_coding	bisque4	green
ENSG00000204348	64.6066	7.24322	DXO	retained_intron	bisque4	green
ENSG00000069275	63.9454	5.58015	NUCKS1	protein_coding	bisque4	green
ENSG00000102241	60.6367	22.4369	HTATSF1	protein_coding	bisque4	green
ENSG00000103888	60.0131	4.16973	CEMIP	protein_coding	bisque4	green
ENSG00000075790	57.8931	14.205	BCAP29	protein_coding	bisque4	green
ENSG00000058453	57.4103	6.98988	CROCC	processed_transcript	bisque4	green
ENSG00000121964	57.1427	5.5524	GTDC1	protein_coding	bisque4	green
ENSG00000122678	55.8127	12.4962	POLM	protein_coding	bisque4	green
ENSG00000255529	51.6049	17.3229	POLR2M	protein_coding	bisque4	green
ENSG00000162734	49.8514	2.51347	PEA15	protein_coding	bisque4	green
ENSG00000165458	48.3539	24.5979	INPPL1	protein_coding	bisque4	green
ENSG00000187715	47.5668	0.604383	KBTBD12	protein_coding	bisque4	green
ENSG00000089685	47.1162	3.37942	BIRC5	protein_coding	bisque4	green
ENSG00000120093	46.9159	1.92848	HOXB3	protein_coding	bisque4	green
ENSG00000064726	46.4866	23.3963	BTBD1	protein_coding	bisque4	green
ENSG00000013561	45.9742	4.32362	RNF14	protein_coding	bisque4	green
ENSG00000009830	44.854	15.6934	POMT2	protein_coding	bisque4	green
ENSG00000231160	41.6497	2.73922	KLF3-AS1	antisense	bisque4	green
ENSG00000213366	35.3203	1.04024	GSTM2	protein_coding	bisque4	green
ENSG00000127419	27.6185	22.57	TMEM175	protein_coding	bisque4	green
ENSG00000278999	23.7056	2.77181	AC008985.1	TEC	bisque4	green
ENSG00000145029	17.4426	5.88946	NICN1	protein_coding	bisque4	green
ENSG00000149809	12.8978	3.60375	TM7SF2	protein_coding	bisque4	green
ENSG00000100239	12.5887	11.0284	PPP6R2	protein_coding	bisque4	green
ENSG00000168781	12.2056	1.29162	PPIP5K1	protein_coding	bisque4	green
ENSG00000261373	425.704	12.4615	VPS9D1-AS1	antisense	bisque4	darkturquoise
ENSG00000186088	402.603	3.66176	GSAP	retained_intron	bisque4	darkturquoise
ENSG00000120370	395.652	0.747855	GORAB	protein_coding	bisque4	darkturquoise
ENSG00000115484	385.872	17.1234	CCT4	protein_coding	bisque4	darkturquoise
ENSG00000122705	380.05	6.92239	CLTA	protein_coding	bisque4	darkturquoise
ENSG00000102057	364.236	11.8736	KCND1	protein_coding	bisque4	darkturquoise
ENSG00000197948	357.111	17.3253	FCHSD1	protein_coding	bisque4	darkturquoise
ENSG00000177483	349.7	2.01673	RBM44	retained_intron	bisque4	darkturquoise
ENSG00000143418	343.646	1.98864	CERS2	retained_intron	bisque4	darkturquoise
ENSG00000134597	322.89	30.7116	RBMX2	protein_coding	bisque4	darkturquoise
ENSG00000235958	321.393	1.34486	UBOX5-AS1	antisense	bisque4	darkturquoise
ENSG00000156471	316.674	10.7621	PTDSS1	protein_coding	bisque4	darkturquoise
ENSG00000239883	309.251	1.85334	PARPG1	processed_transcript	bisque4	darkturquoise
ENSG00000226091	278.253	0.982615	LINC00937	lincRNA	bisque4	darkturquoise
ENSG00000100353	277.094	16.4681	EIF3D	protein_coding	bisque4	darkturquoise
ENSG00000228804	267.876	2.36317	RP11-211G3.3	antisense	bisque4	darkturquoise
ENSG00000119335	267.847	25.899	SET	protein_coding	bisque4	darkturquoise
ENSG00000163655	257.599	16.4126	GMPS	protein_coding	bisque4	darkturquoise
ENSG00000100380	257.428	35.0973	ST13	protein_coding	bisque4	darkturquoise
ENSG00000185862	256.412	20.2674	EVI2B	protein_coding	bisque4	darkturquoise
ENSG00000103342	250.61	2.03484	GSPT1	protein_coding	bisque4	darkturquoise
ENSG00000159596	247.278	5.92832	TMEM69	protein_coding	bisque4	darkturquoise
ENSG00000084754	246.068	22.4282	HADHA	protein_coding	bisque4	darkturquoise
ENSG00000110911	245.778	9.94957	SLC11A2	nonsense_mediated_decay	bisque4	darkturquoise
ENSG00000196123	241.4	16.3244	KIAA0895L	processed_transcript	bisque4	darkturquoise
ENSG00000230724	240.803	9.56568	LINC01001	lincRNA	bisque4	darkturquoise
ENSG00000113269	240.327	17.6538	RNF130	protein_coding	bisque4	darkturquoise
ENSG00000101342	237.827	8.64847	TLDC2	protein_coding	bisque4	darkturquoise
ENSG00000100439	235.064	0.432911	ABHD4	protein_coding	bisque4	darkturquoise
ENSG00000187726	231.334	8.0879	DNAJB13	protein_coding	bisque4	darkturquoise
ENSG00000226312	230.404	12.8669	CFLAR-AS1	antisense	bisque4	darkturquoise
ENSG00000185104	225.939	9.18117	FAF1	protein_coding	bisque4	darkturquoise
ENSG00000215021	221.869	16.1952	PHB2	retained_intron	bisque4	darkturquoise
ENSG00000090924	221.202	11.6741	PLEKHG2	protein_coding	bisque4	darkturquoise
ENSG00000237094	219.044	9.01548	RP4-669L17.10	lincRNA	bisque4	darkturquoise
ENSG00000136938	208.478	34.3126	ANP32B	protein_coding	bisque4	darkturquoise
ENSG00000276488	207.982	3.41738	CTD-2537I9.18	antisense	bisque4	darkturquoise
ENSG00000280011	204.219	1.86009	RP4-671O14.7	antisense	bisque4	darkturquoise
ENSG00000258424	201.685	1.22779	RP11-471B22.2	antisense	bisque4	darkturquoise
ENSG00000237522	200.277	9.37121	NONOP2	processed_pseudogene	bisque4	darkturquoise
ENSG00000100216	200.061	13.3511	TOMM22	protein_coding	bisque4	darkturquoise
ENSG00000250575	199.214	6.93769	RP4-669L17.8	unprocessed_pseudogene	bisque4	darkturquoise
ENSG00000143457	191.977	2.22656	GOLPH3L	protein_coding	bisque4	darkturquoise
ENSG00000237399	188.978	0.918886	PITRM1-AS1	antisense	bisque4	darkturquoise
ENSG00000146731	185.17	20.5421	CCT6A	protein_coding	bisque4	darkturquoise
ENSG00000127022	181.838	10.9278	CANX	protein_coding	bisque4	darkturquoise
ENSG00000268030	180.567	8.02486	AC005253.2	antisense	bisque4	darkturquoise
ENSG00000261351	164.581	4.99718	CTD-3185P2.1	antisense	bisque4	darkturquoise
ENSG00000269981	161.782	5.75098	RP11-34P13.16	processed_pseudogene	bisque4	darkturquoise
ENSG00000280007	154.781	4.96095	AC008079.10	antisense	bisque4	darkturquoise
ENSG00000086189	152.537	8.93425	DIMT1	protein_coding	bisque4	darkturquoise
ENSG00000148824	151.955	1.81254	MTG1	protein_coding	bisque4	darkturquoise
ENSG00000245149	151.092	5.54054	RNF139-AS1	lincRNA	bisque4	darkturquoise
ENSG00000154217	150.604	5.86964	PITPNC1	protein_coding	bisque4	darkturquoise
ENSG00000168404	145.351	7.69584	MLKL	protein_coding	bisque4	darkturquoise
ENSG00000233750	137.645	4.66846	CICP27	processed_pseudogene	bisque4	darkturquoise
ENSG00000148730	134.923	5.1093	EIF4EBP2	protein_coding	bisque4	darkturquoise
ENSG00000260929	132.808	1.82064	RP11-327F22.1	antisense	bisque4	darkturquoise
ENSG00000130741	132.098	23.3484	EIF2S3	protein_coding	bisque4	darkturquoise
ENSG00000212607	131.106	1.05981	SNORA45B	snoRNA	bisque4	darkturquoise
ENSG00000271913	127.108	1.13822	RP1-111C20.4	antisense	bisque4	darkturquoise
ENSG00000132305	126.575	1.83946	IMMT	protein_coding	bisque4	darkturquoise
ENSG00000104341	124.177	2.65709	LAPTM4B	protein_coding	bisque4	darkturquoise
ENSG00000091831	123.475	1.95791	ESR1	processed_transcript	bisque4	darkturquoise
ENSG00000262222	117.251	1.80577	RP11-876N24.4	antisense	bisque4	darkturquoise
ENSG00000263069	115.729	10.4362	CTD-2047H16.4	antisense	bisque4	darkturquoise
ENSG00000214135	115.638	0.307194	AC024560.3	processed_transcript	bisque4	darkturquoise
ENSG00000266028	109.907	4.26768	SRGAP2	protein_coding	bisque4	darkturquoise
ENSG00000134717	107.089	29.588	BTF3L4	protein_coding	bisque4	darkturquoise
ENSG00000144381	106.412	14.8627	HSPD1	protein_coding	bisque4	darkturquoise
ENSG00000163950	102.689	12.3615	SLBP	protein_coding	bisque4	darkturquoise
ENSG00000144867	102.37	9.82972	SRPRB	protein_coding	bisque4	darkturquoise
ENSG00000181322	101.975	0.935553	NME9	protein_coding	bisque4	darkturquoise
ENSG00000122034	101.886	10.6407	GTF3A	protein_coding	bisque4	darkturquoise
ENSG00000146556	100.137	2.04669	WASH2P	transcribed_unprocessed_pseudogene	bisque4	darkturquoise
ENSG00000180509	99.4382	4.49649	KCNE1	protein_coding	bisque4	darkturquoise
ENSG00000162888	99.0826	3.87885	C1orf147	antisense	bisque4	darkturquoise
ENSG00000184154	98.1861	1.13359	LRTOMT	protein_coding	bisque4	darkturquoise
ENSG00000143127	98.0444	4.55161	ITGA10	protein_coding	bisque4	darkturquoise
ENSG00000240710	97.7784	1.04738	RP11-430C7.4	antisense	bisque4	darkturquoise
ENSG00000133392	96.8592	4.34771	MYH11	protein_coding	bisque4	darkturquoise
ENSG00000255893	94.2413	0.913278	RP11-685N10.1	antisense	bisque4	darkturquoise
ENSG00000197958	93.2085	15.3909	RPL12	protein_coding	bisque4	darkturquoise
ENSG00000093134	92.4373	0.426902	VNN3	protein_coding	bisque4	darkturquoise
ENSG00000111142	89.9608	34.5969	METAP2	nonsense_mediated_decay	bisque4	darkturquoise
ENSG00000114745	89.6782	8.27842	GORASP1	retained_intron	bisque4	darkturquoise
ENSG00000175309	89.3878	7.43697	PHYKPL	protein_coding	bisque4	darkturquoise
ENSG00000159403	87.4805	0.847925	C1R	protein_coding	bisque4	darkturquoise
ENSG00000161647	83.085	1.23912	MPP3	protein_coding	bisque4	darkturquoise
ENSG00000146223	81.7983	9.79081	RPL7L1	processed_transcript	bisque4	darkturquoise
ENSG00000105176	81.3519	6.96488	URI1	protein_coding	bisque4	darkturquoise
ENSG00000135387	80.9081	12.255	CAPRIN1	protein_coding	bisque4	darkturquoise
ENSG00000224796	80.2479	0.683747	RPL32P1	processed_pseudogene	bisque4	darkturquoise
ENSG00000253326	78.0515	1.13438	RP11-261C10.7	processed_pseudogene	bisque4	darkturquoise
ENSG00000268903	74.9245	3.13504	RP11-34P13.15	processed_pseudogene	bisque4	darkturquoise
ENSG00000268366	74.8358	1.06779	CTC-492K19.4	antisense	bisque4	darkturquoise
ENSG00000165526	74.467	8.33215	RPUSD4	protein_coding	bisque4	darkturquoise
ENSG00000148356	74.3076	12.6405	LRSAM1	protein_coding	bisque4	darkturquoise
ENSG00000099715	73.7965	0.299978	PCDH11Y	protein_coding	bisque4	darkturquoise
ENSG00000270083	71.326	0.676038	RP1-257I20.14	sense_intronic	bisque4	darkturquoise
ENSG00000204584	68.6808	1.84839	RP11-304F15.3	antisense	bisque4	darkturquoise
ENSG00000167202	65.0418	5.82494	TBC1D2B	protein_coding	bisque4	darkturquoise
ENSG00000145982	63.2179	1.50935	FARS2	protein_coding	bisque4	darkturquoise
ENSG00000008323	60.8146	1.13786	PLEKHG6	protein_coding	bisque4	darkturquoise
ENSG00000137054	59.9611	4.8181	POLR1E	protein_coding	bisque4	darkturquoise
ENSG00000152284	56.2893	0.817911	TCF7L1	protein_coding	bisque4	darkturquoise
ENSG00000167377	53.4063	1.38902	ZNF23	retained_intron	bisque4	darkturquoise
ENSG00000280033	52.3396	2.6099	CTD-2095E4.3	TEC	bisque4	darkturquoise
ENSG00000272086	51.8477	1.92649	CTD-2186M15.3	lincRNA	bisque4	darkturquoise
ENSG00000264573	50.6611	4.94214	RN7SL15P	misc_RNA	bisque4	darkturquoise
ENSG00000157999	50.0411	3.97892	ANKRD61	protein_coding	bisque4	darkturquoise
ENSG00000063046	48.2129	29.034	EIF4B	protein_coding	bisque4	darkturquoise
ENSG00000204991	47.8784	1.64283	SPIRE2	processed_transcript	bisque4	darkturquoise
ENSG00000259884	46.907	0.538229	RP11-1100L3.8	lincRNA	bisque4	darkturquoise
ENSG00000234062	43.8034	1.33744	RP11-308D16.2	processed_transcript	bisque4	darkturquoise
ENSG00000182179	41.8144	29.1534	UBA7	protein_coding	bisque4	darkturquoise
ENSG00000266340	40.7229	4.58902	RP11-848P1.4	antisense	bisque4	darkturquoise
ENSG00000189171	38.6943	0.761044	S100A13	processed_transcript	bisque4	darkturquoise
ENSG00000048991	38.4444	7.60066	R3HDM1	processed_transcript	bisque4	darkturquoise
ENSG00000237484	38.3715	2.71613	AP000476.1	lincRNA	bisque4	darkturquoise
ENSG00000119723	34.9296	1.73931	COQ6	protein_coding	bisque4	darkturquoise
ENSG00000135250	31.4465	5.39277	SRPK2	processed_transcript	bisque4	darkturquoise
ENSG00000236409	31.1266	0.815069	NRADDP	unitary_pseudogene	bisque4	darkturquoise
ENSG00000172465	29.0927	2.97353	TCEAL1	protein_coding	bisque4	darkturquoise
ENSG00000068976	27.1961	14.0829	PYGM	retained_intron	bisque4	darkturquoise
ENSG00000155508	26.5052	11.6254	CNOT8	processed_transcript	bisque4	darkturquoise
ENSG00000100749	21.6988	4.97134	VRK1	protein_coding	bisque4	darkturquoise
ENSG00000106333	21.1673	4.46124	PCOLCE	protein_coding	bisque4	darkturquoise
ENSG00000142082	20.3224	3.82176	SIRT3	protein_coding	bisque4	darkturquoise
ENSG00000267029	19.3392	1.16353	AC092299.7	transcribed_processed_pseudogene	bisque4	darkturquoise
ENSG00000240682	18.3312	3.6558	ISY1	protein_coding	bisque4	darkturquoise
ENSG00000096384	16.6477	13.7468	HSP90AB1	protein_coding	bisque4	darkturquoise
ENSG00000140859	14.4746	2.32363	KIFC3	protein_coding	bisque4	darkturquoise
ENSG00000021762	6.968	16.2262	OSBPL5	protein_coding	bisque4	darkturquoise
ENSG00000109606	498.68	214.719	DHX15	processed_transcript	bisque4	blue
ENSG00000134900	461.542	210.157	TPP2	protein_coding	bisque4	blue
ENSG00000103502	444.355	64.8094	CDIPT	protein_coding	bisque4	blue
ENSG00000234769	421.667	22.5331	WASH4P	protein_coding	bisque4	blue
ENSG00000156502	421.021	170.199	SUPV3L1	protein_coding	bisque4	blue
ENSG00000163902	410.376	112.304	RPN1	protein_coding	bisque4	blue
ENSG00000159588	410.308	19.3363	CCDC17	nonsense_mediated_decay	bisque4	blue
ENSG00000105519	401.65	75.026	CAPS	protein_coding	bisque4	blue
ENSG00000143612	396.876	36.7239	C1orf43	protein_coding	bisque4	blue
ENSG00000128159	383.478	116.053	TUBGCP6	protein_coding	bisque4	blue
ENSG00000241553	380.487	11.6755	ARPC4	protein_coding	bisque4	blue
ENSG00000128311	378.961	168.928	TST	protein_coding	bisque4	blue
ENSG00000075785	377.775	39.7138	RAB7A	protein_coding	bisque4	blue
ENSG00000236199	377.216	5.87874	RP11-264I13.2	antisense	bisque4	blue
ENSG00000124789	373.15	339.154	NUP153	protein_coding	bisque4	blue
ENSG00000106105	368.591	70.8205	GARS	protein_coding	bisque4	blue
ENSG00000187961	368.56	117.918	KLHL17	protein_coding	bisque4	blue
ENSG00000164338	366.44	64.2904	UTP15	protein_coding	bisque4	blue
ENSG00000204305	360.156	31.2086	AGER	retained_intron	bisque4	blue
ENSG00000117676	358.505	150.792	RPS6KA1	nonsense_mediated_decay	bisque4	blue
ENSG00000100483	358.382	279.042	VCPKMT	retained_intron	bisque4	blue
ENSG00000164062	358.326	257.532	APEH	protein_coding	bisque4	blue
ENSG00000167524	353.836	28.2326	SGK494	retained_intron	bisque4	blue
ENSG00000198393	353.773	33.5798	ZNF26	processed_transcript	bisque4	blue
ENSG00000166747	353.303	309.569	AP1G1	protein_coding	bisque4	blue
ENSG00000217128	352.616	279.332	FNIP1	protein_coding	bisque4	blue
ENSG00000113328	350.264	147.626	CCNG1	protein_coding	bisque4	blue
ENSG00000246922	347.938	46.0683	UBAP1L	protein_coding	bisque4	blue
ENSG00000078369	347.312	45.469	GNB1	protein_coding	bisque4	blue
ENSG00000179010	343.31	48.6767	MRFAP1	protein_coding	bisque4	blue
ENSG00000066422	343.124	158.077	ZBTB11	protein_coding	bisque4	blue
ENSG00000224470	342.979	226.941	ATXN1L	protein_coding	bisque4	blue
ENSG00000132155	342.752	206.039	RAF1	protein_coding	bisque4	blue
ENSG00000269343	338.301	6.34001	ZNF587B	protein_coding	bisque4	blue
ENSG00000105821	336.988	188.959	DNAJC2	protein_coding	bisque4	blue
[truncated: 7,829 more rows]
