# Supplementary material for: Characterization of Long Non-Coding RNAs in Systemic Sclerosis Monocytes: A Potential Role for PSMB8-AS1 in Altered Cytokine Secretion
Source: Int J Mol Sci. 2021 Apr 22;22(9):4365. doi: 10.3390/ijms22094365 (PMC8122435; doi:10.3390/ijms22094365)
Supplement: Supplementary file 1 [file ijms-22-04365-s001.zip › SupplementaryTable_4.xlsx]

## Sheet: Blad1
Definite cohort
	Cyclophosphamide	Methotrexate	Azathioprine	Mycophenolate mofetil	Prednisone	Hydroxychloroquine	Iloprost
ncSSc (7)	0	0	0	0	0	0	1
lcSSc (11)	1	0	1	0	0	0	0
dcSSc (7)	2	2	0	1	2	1	1
Non-cutaneous cohort
	Cyclophosphamide	Methotrexate	Azathioprine	Mycophenolate mofetil	Prednisone	Hydroxychloroquine	Iloprost
RP (9)	0	0	0	0	0	0	0
eaSSc (11)	0	0	0	0	0	1	0
ncSSc (10)	0	0	0	0	0	0	2
Replication cohort
	Cyclophosphamide	Methotrexate	Azathioprine	Mycophenolate mofetil	Prednisone	Hydroxychloroquine	Iloprost
eaSSc (5)	0	0	0	0	1	1	0
ncSSc (6)	0	2	0	0	0	1	0
lcSSc (10)	0	1	0	0	1	0	1
dcSSc (6)	0	2	1	2	1	0	0
